# Supplementary material
Source: PubMed Central journal article supplement (PMC4589495)

Mutant ENSDARG0000003025\_2

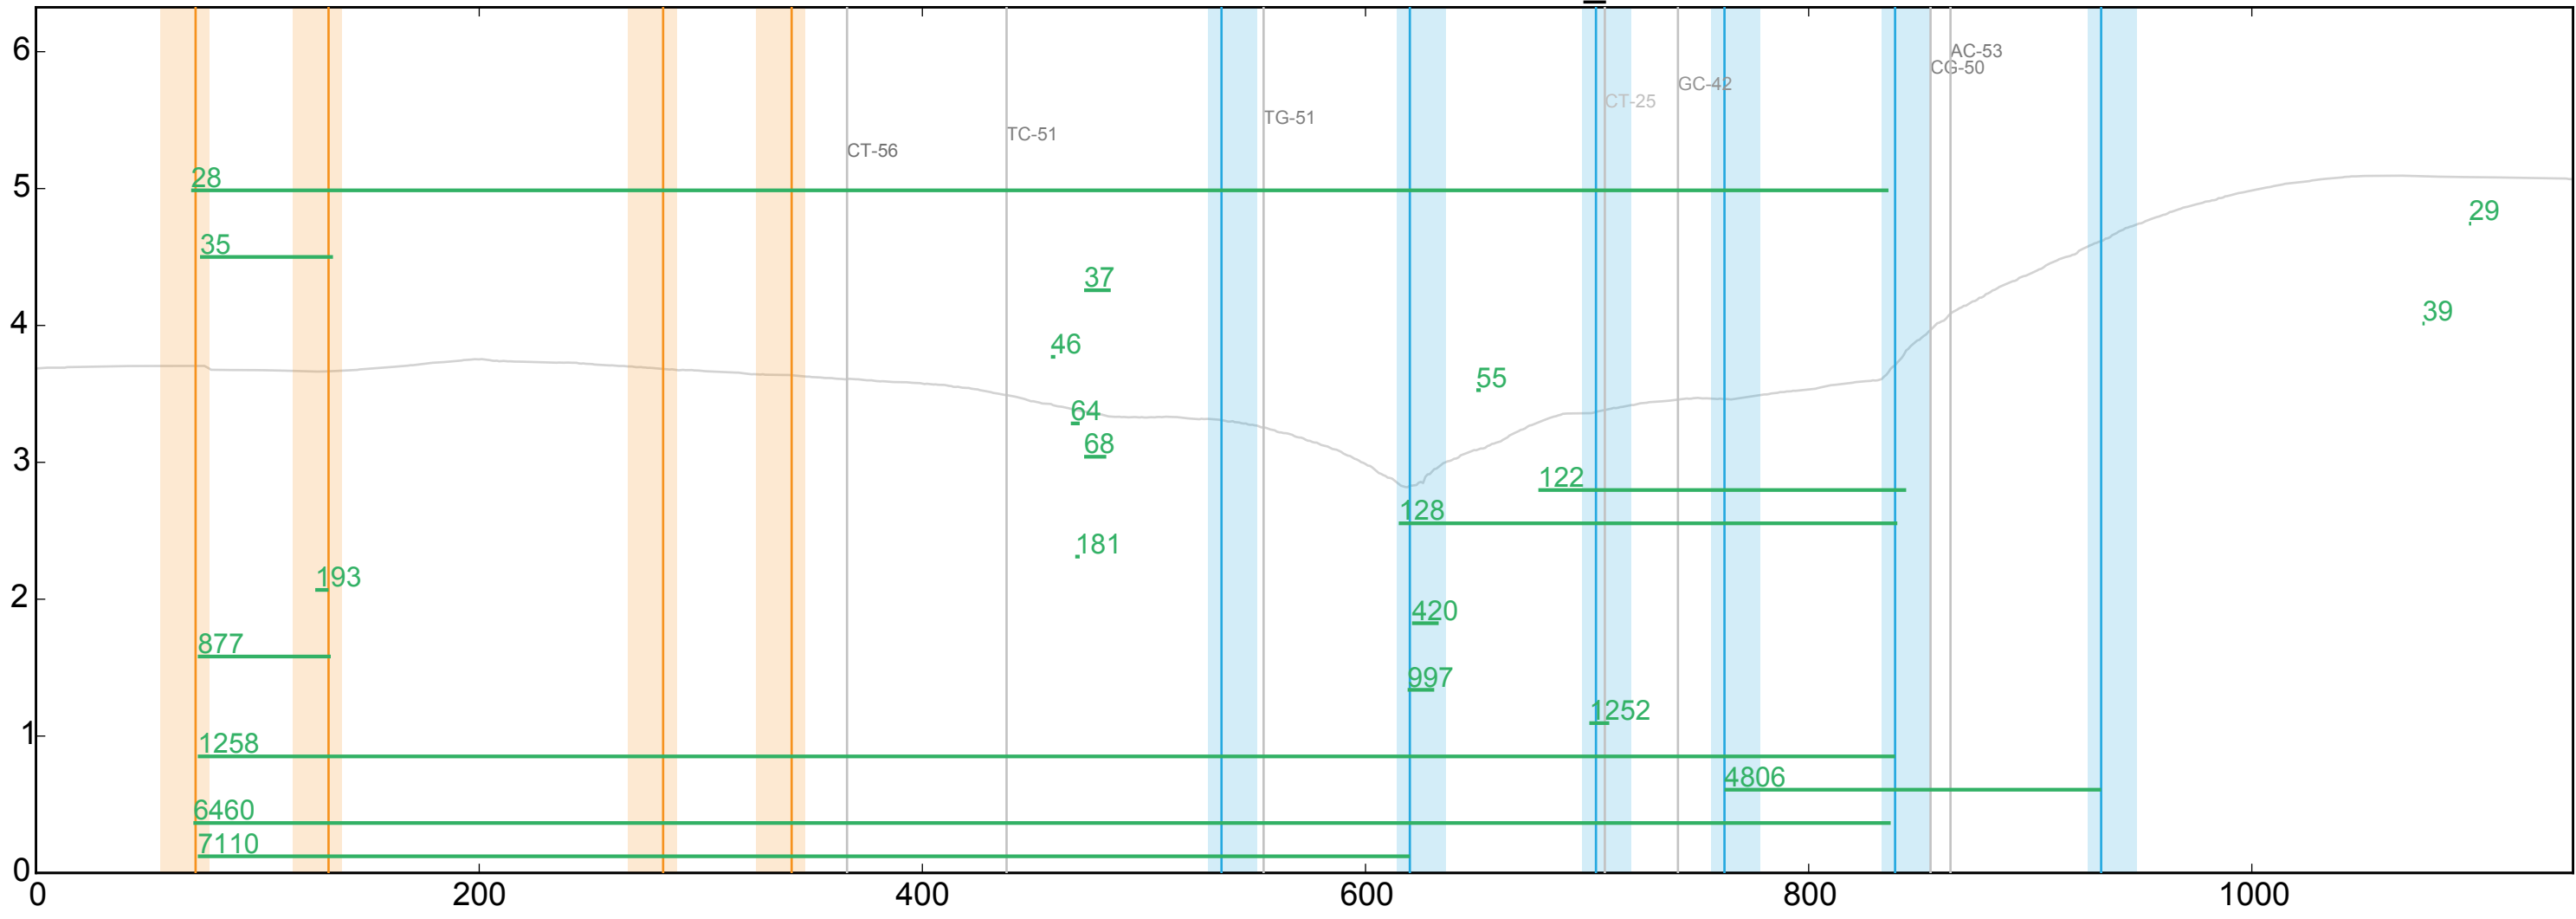

WT ENSDARG0000003025\_2

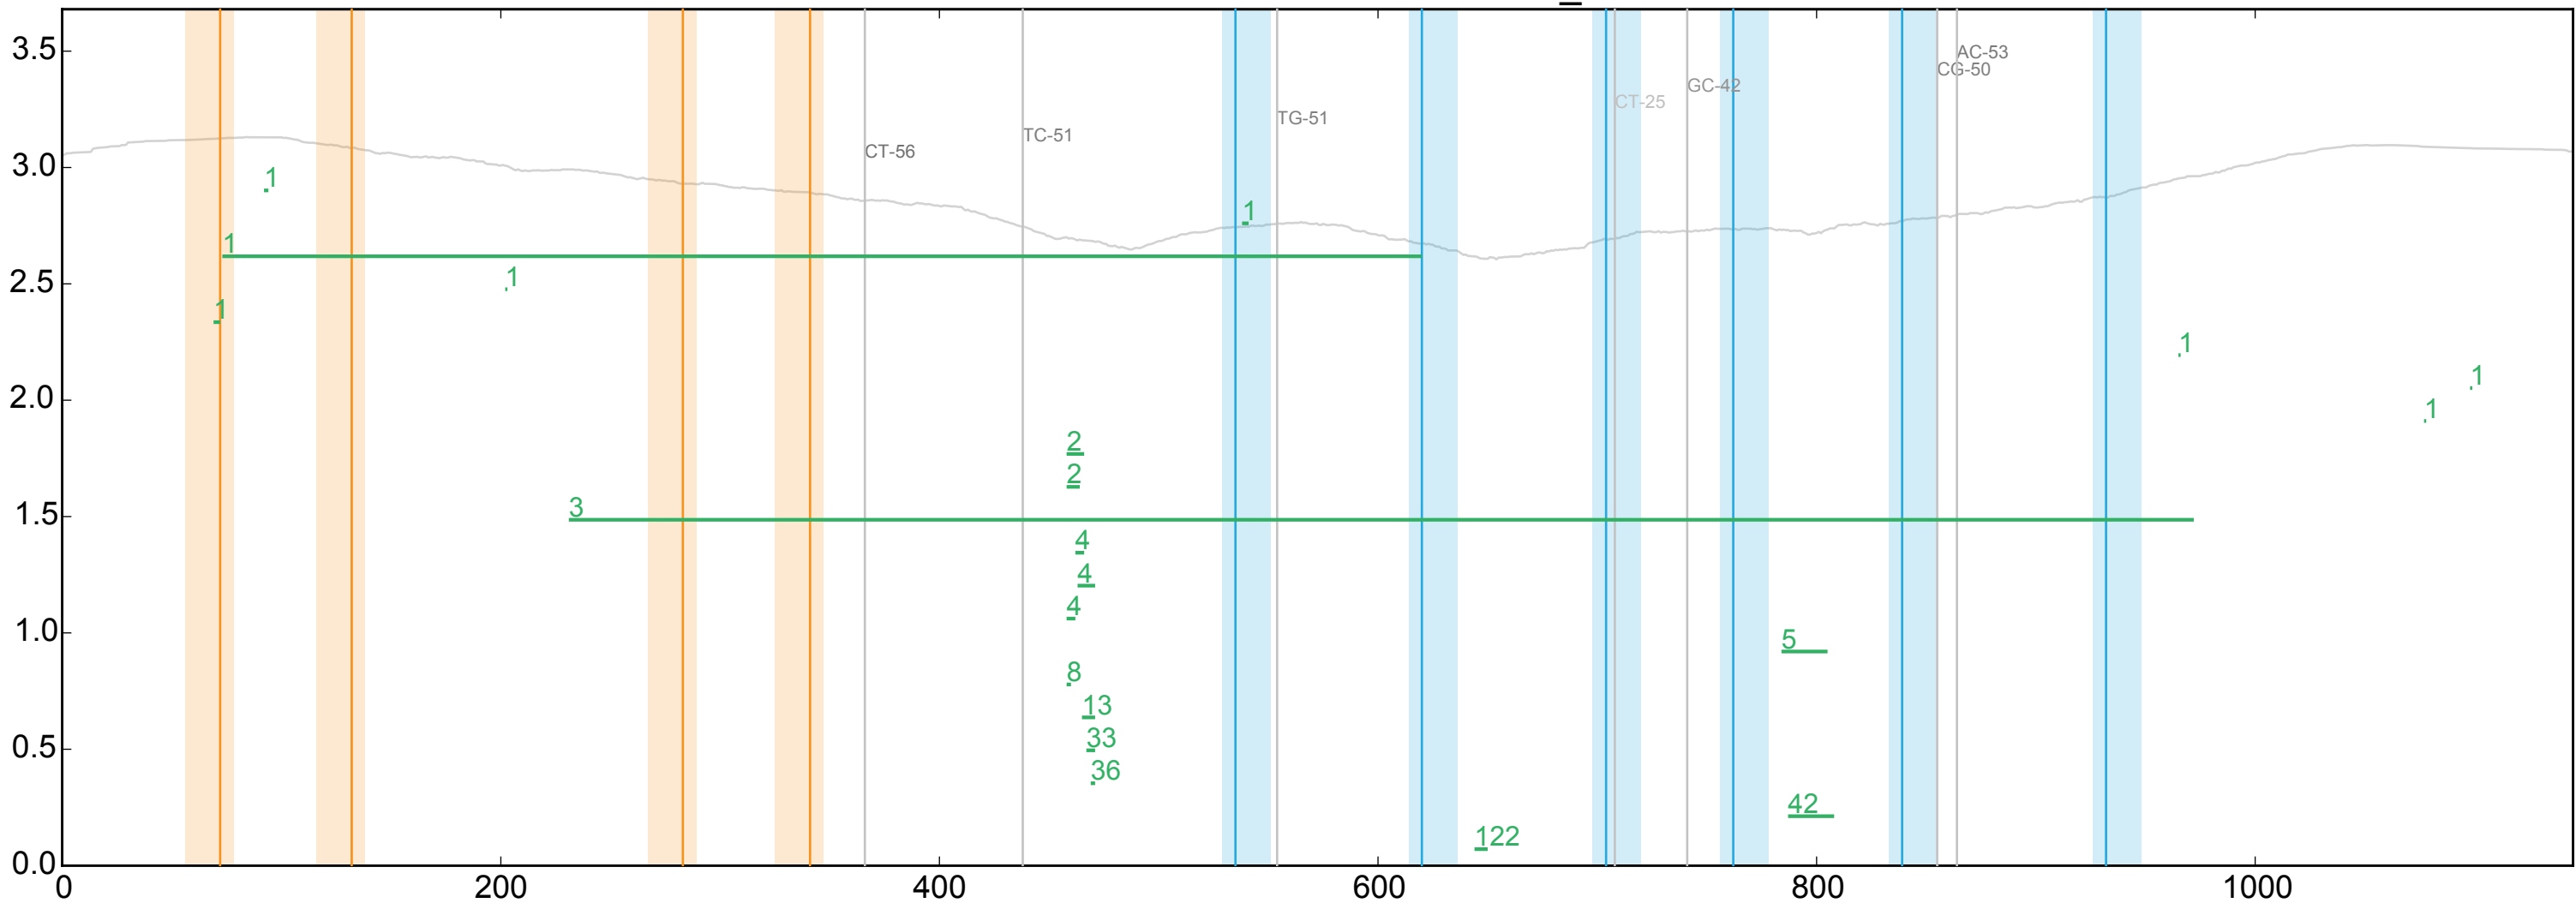

Mutant ENSDARG00000074474\_8

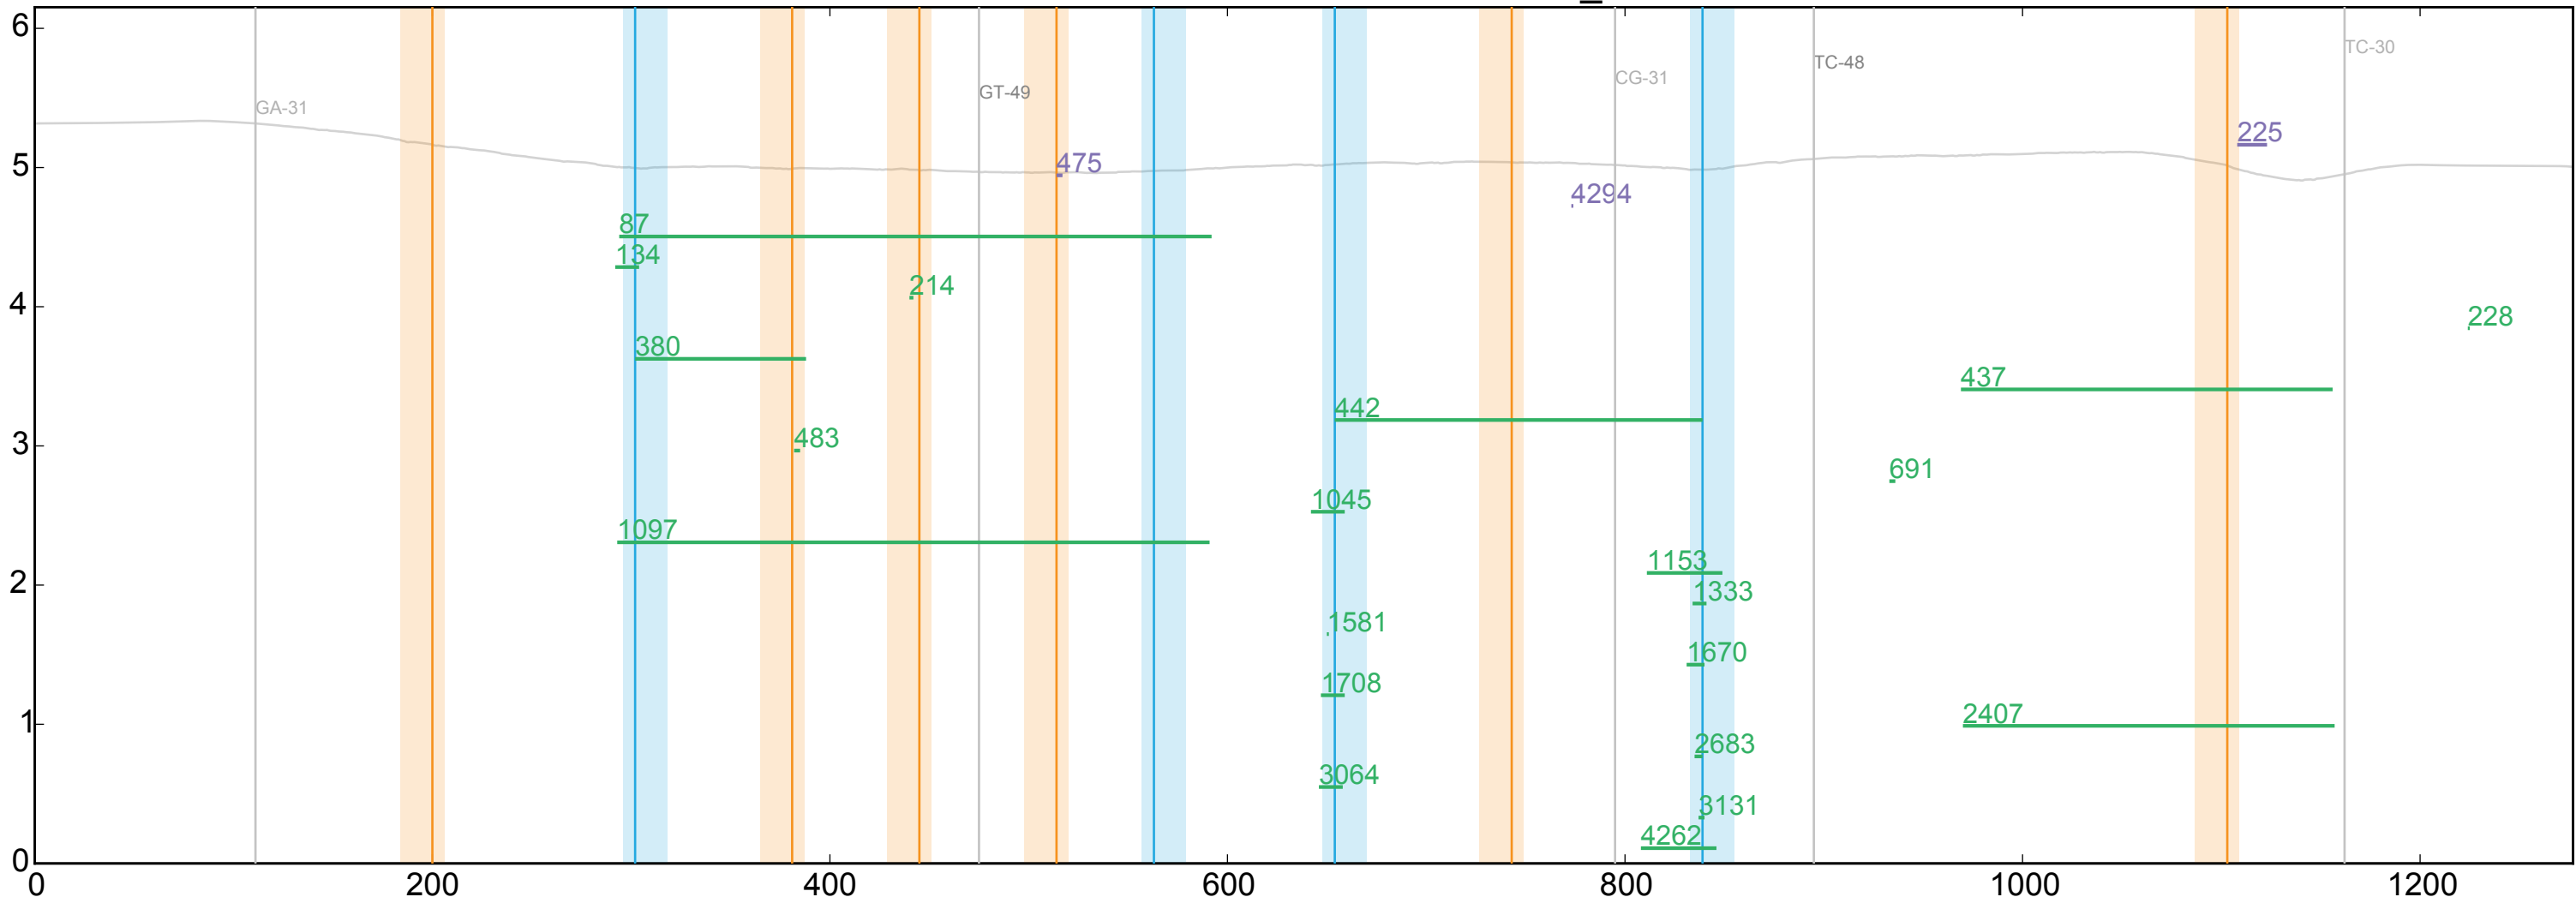

WT ENSDARG00000074474\_8

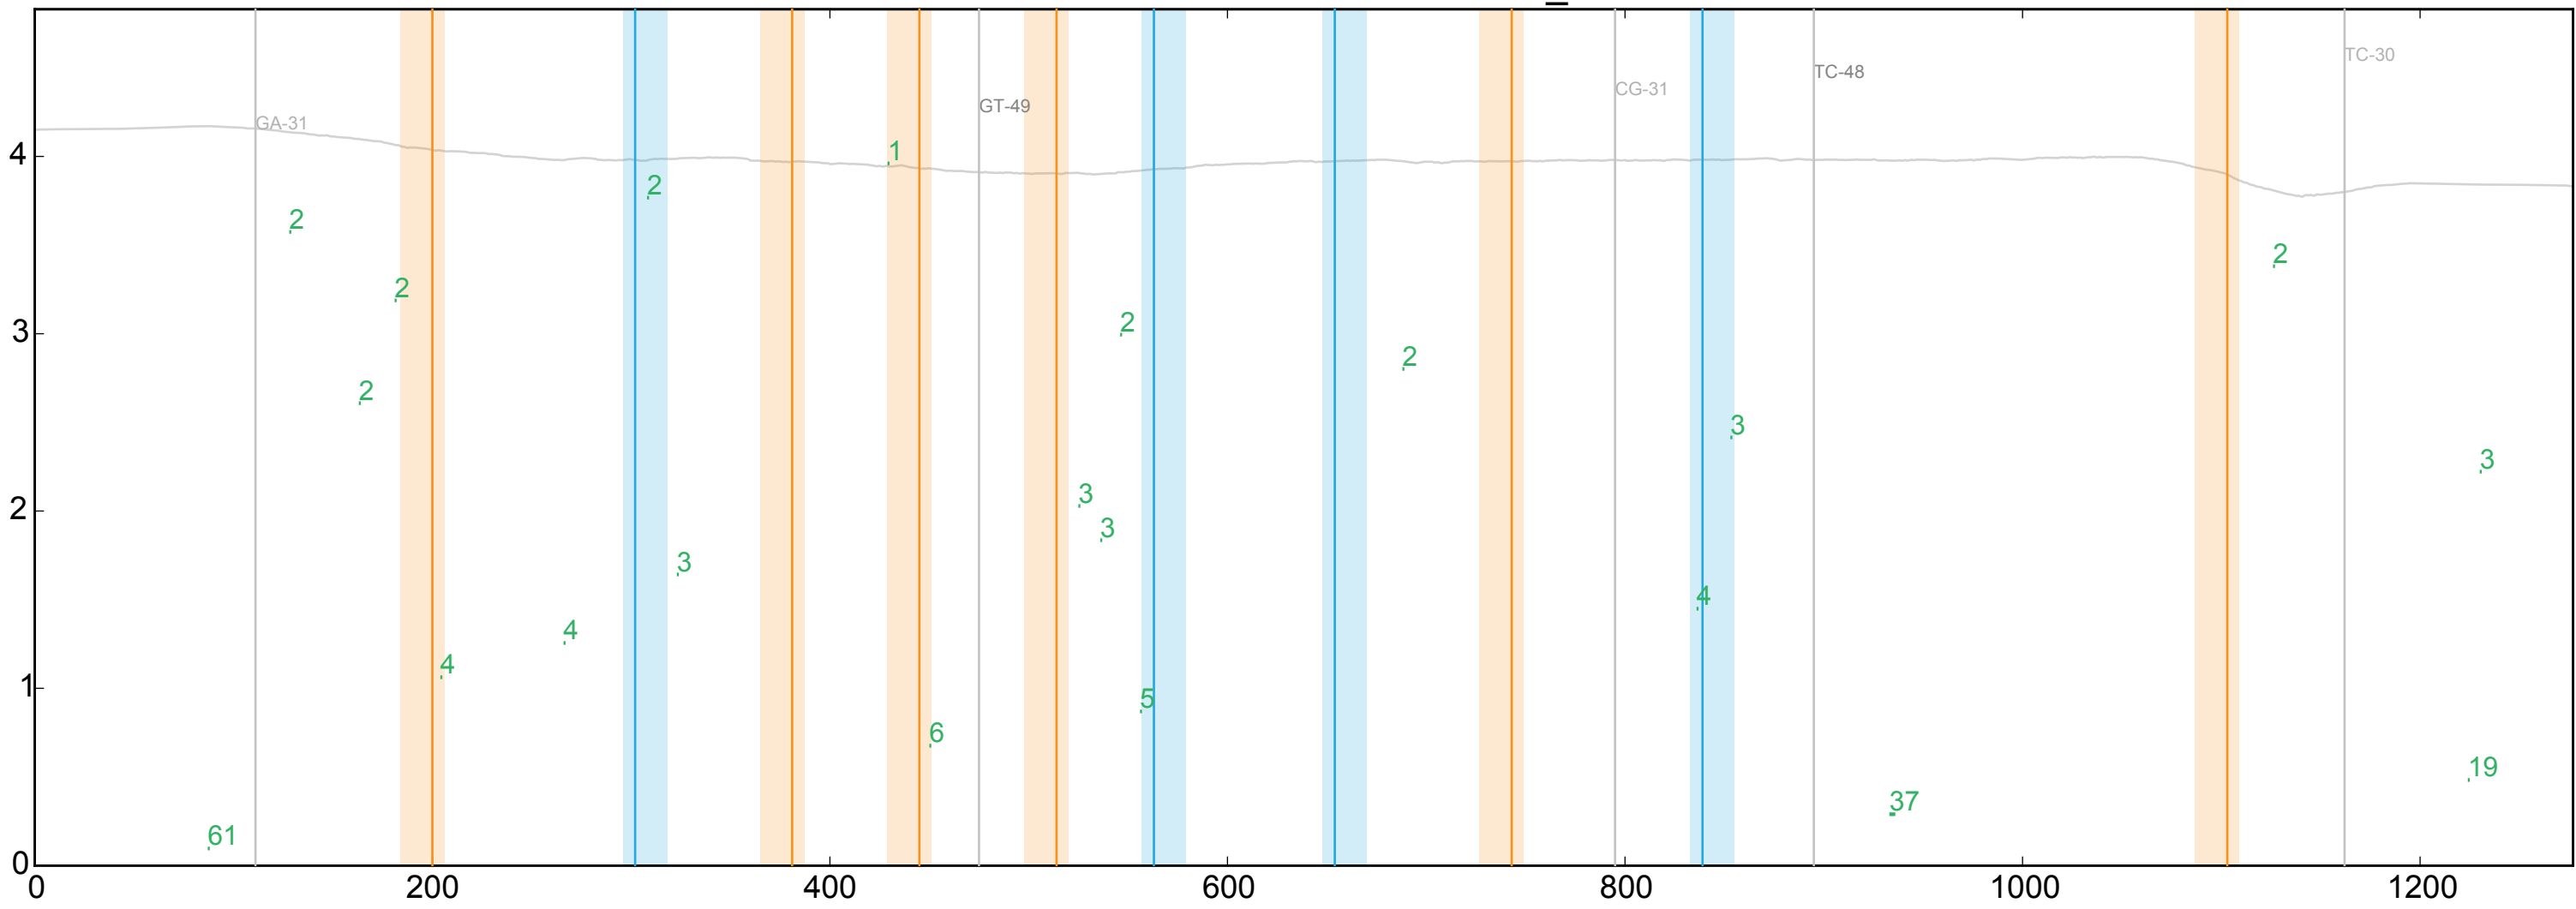

Mutant ENSDARG00000088347\_3

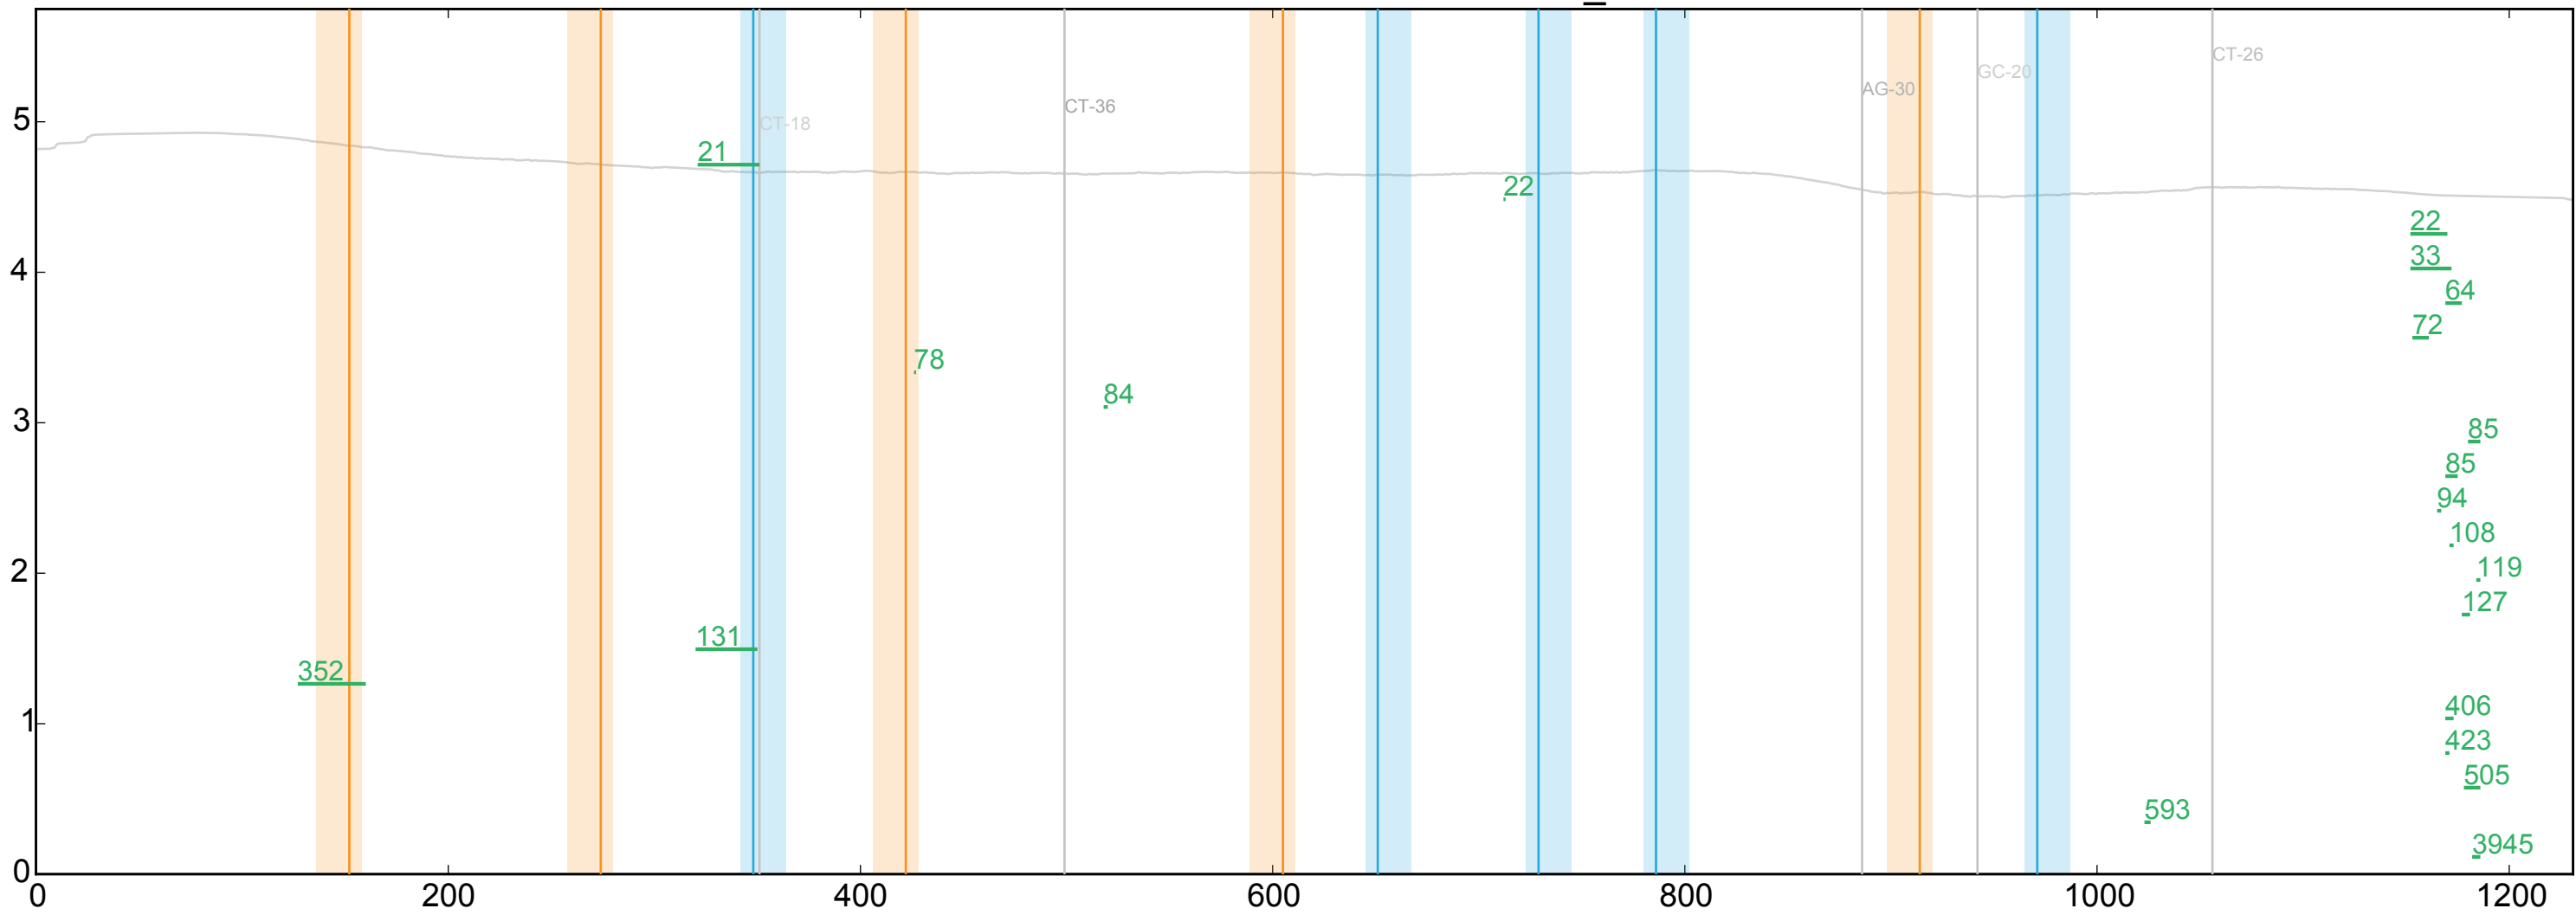

WT ENSDARG00000088347\_3

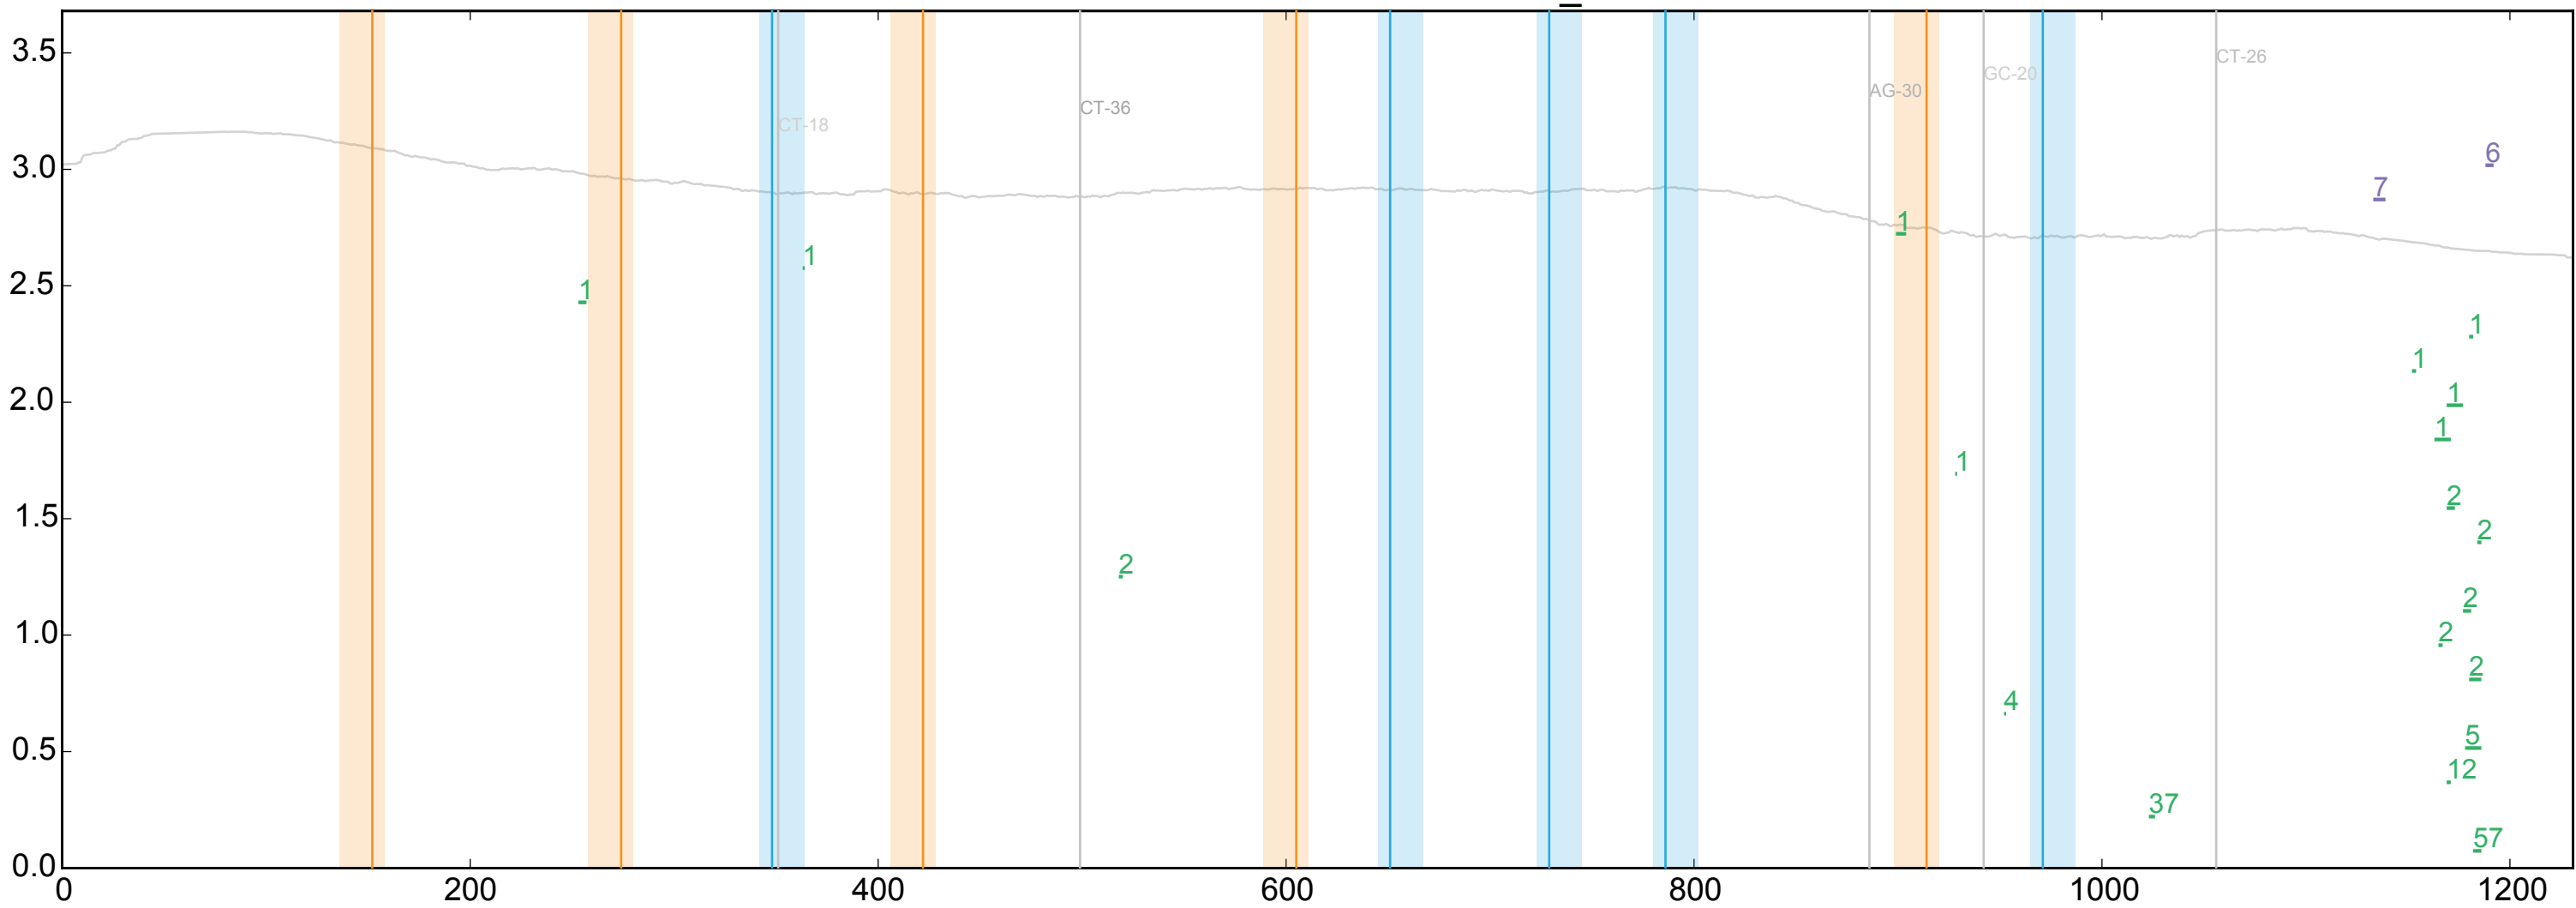



Mutant ENSDARG00000044671\_0

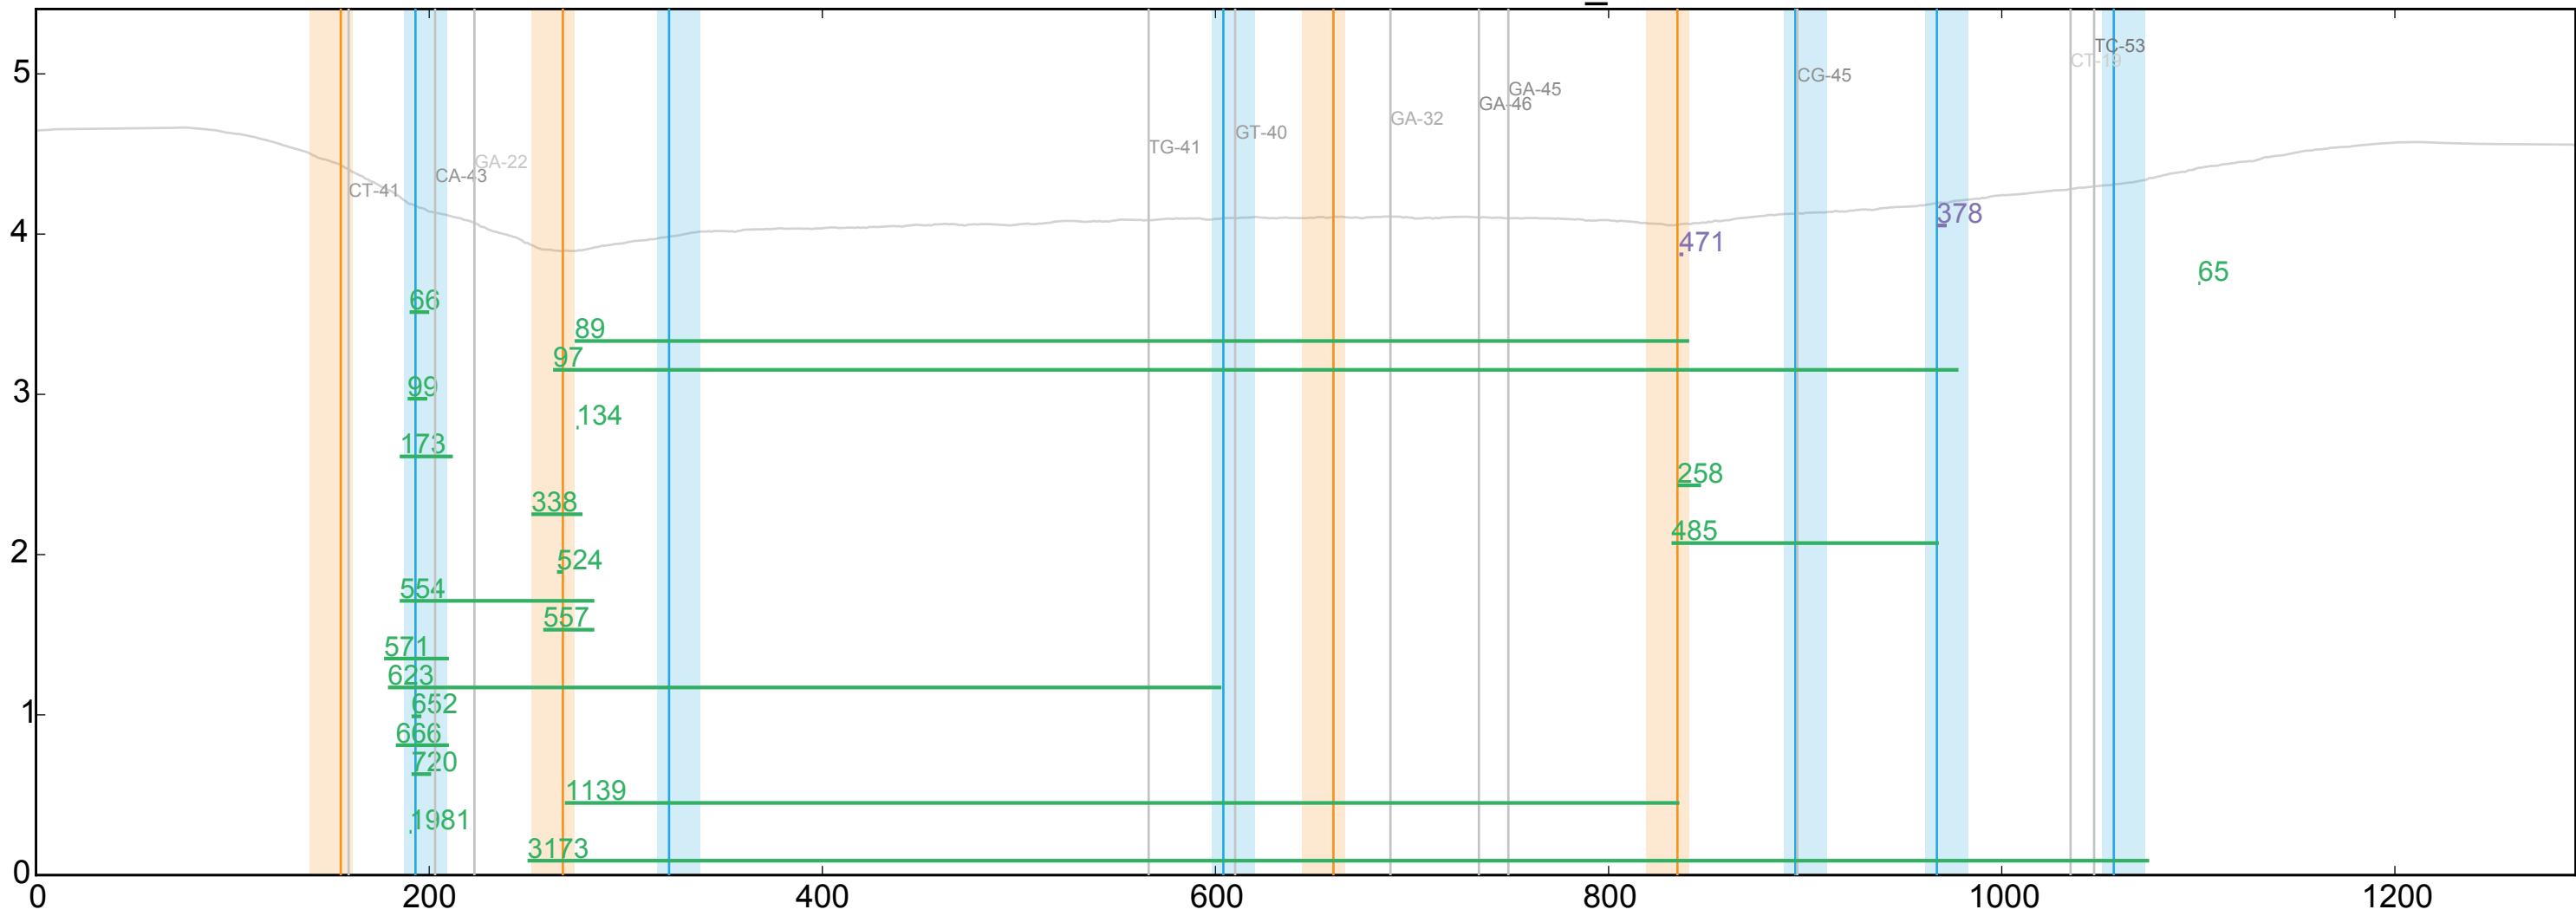

WT ENSDARG00000044671\_0

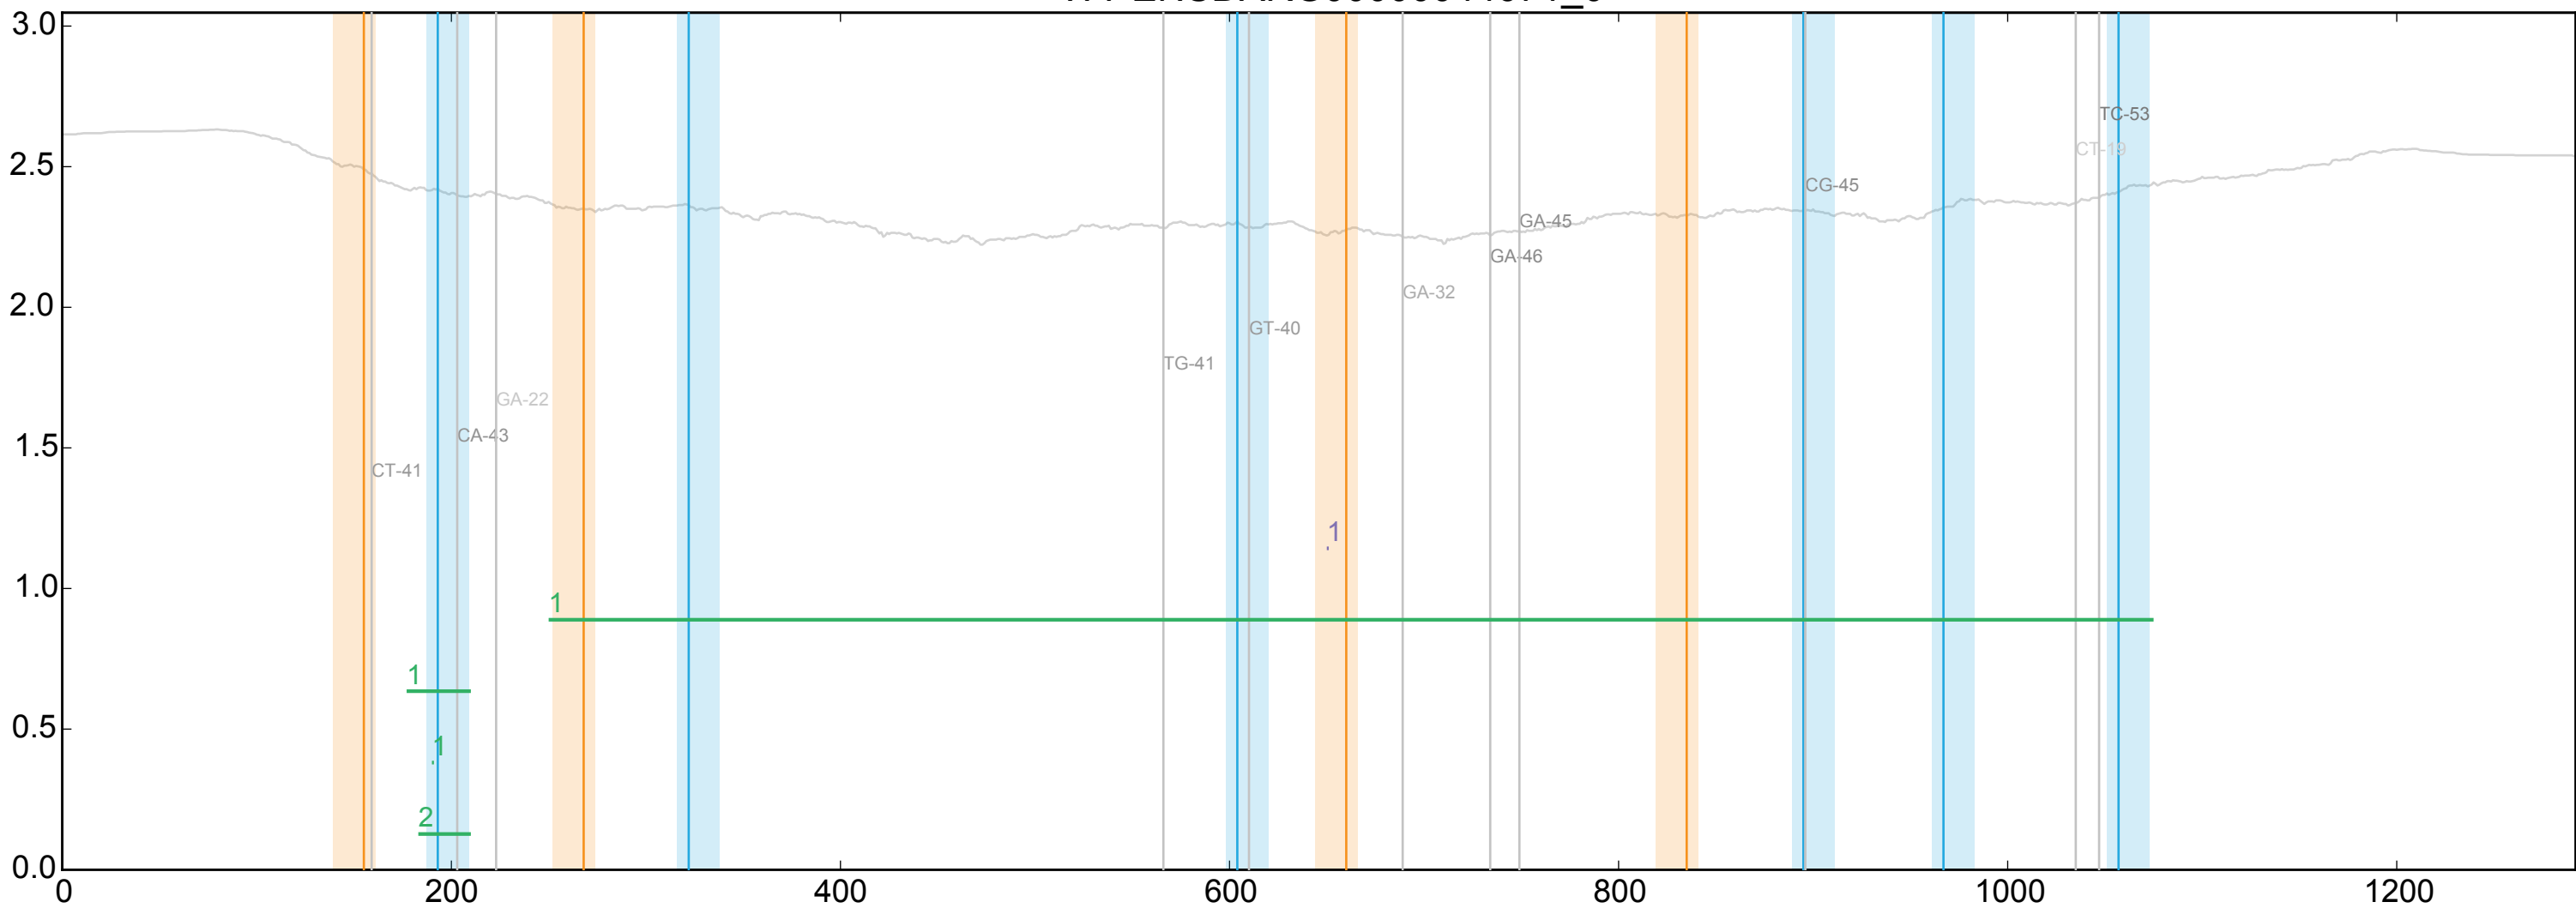





Mutant ENSDARG00000079475\_7

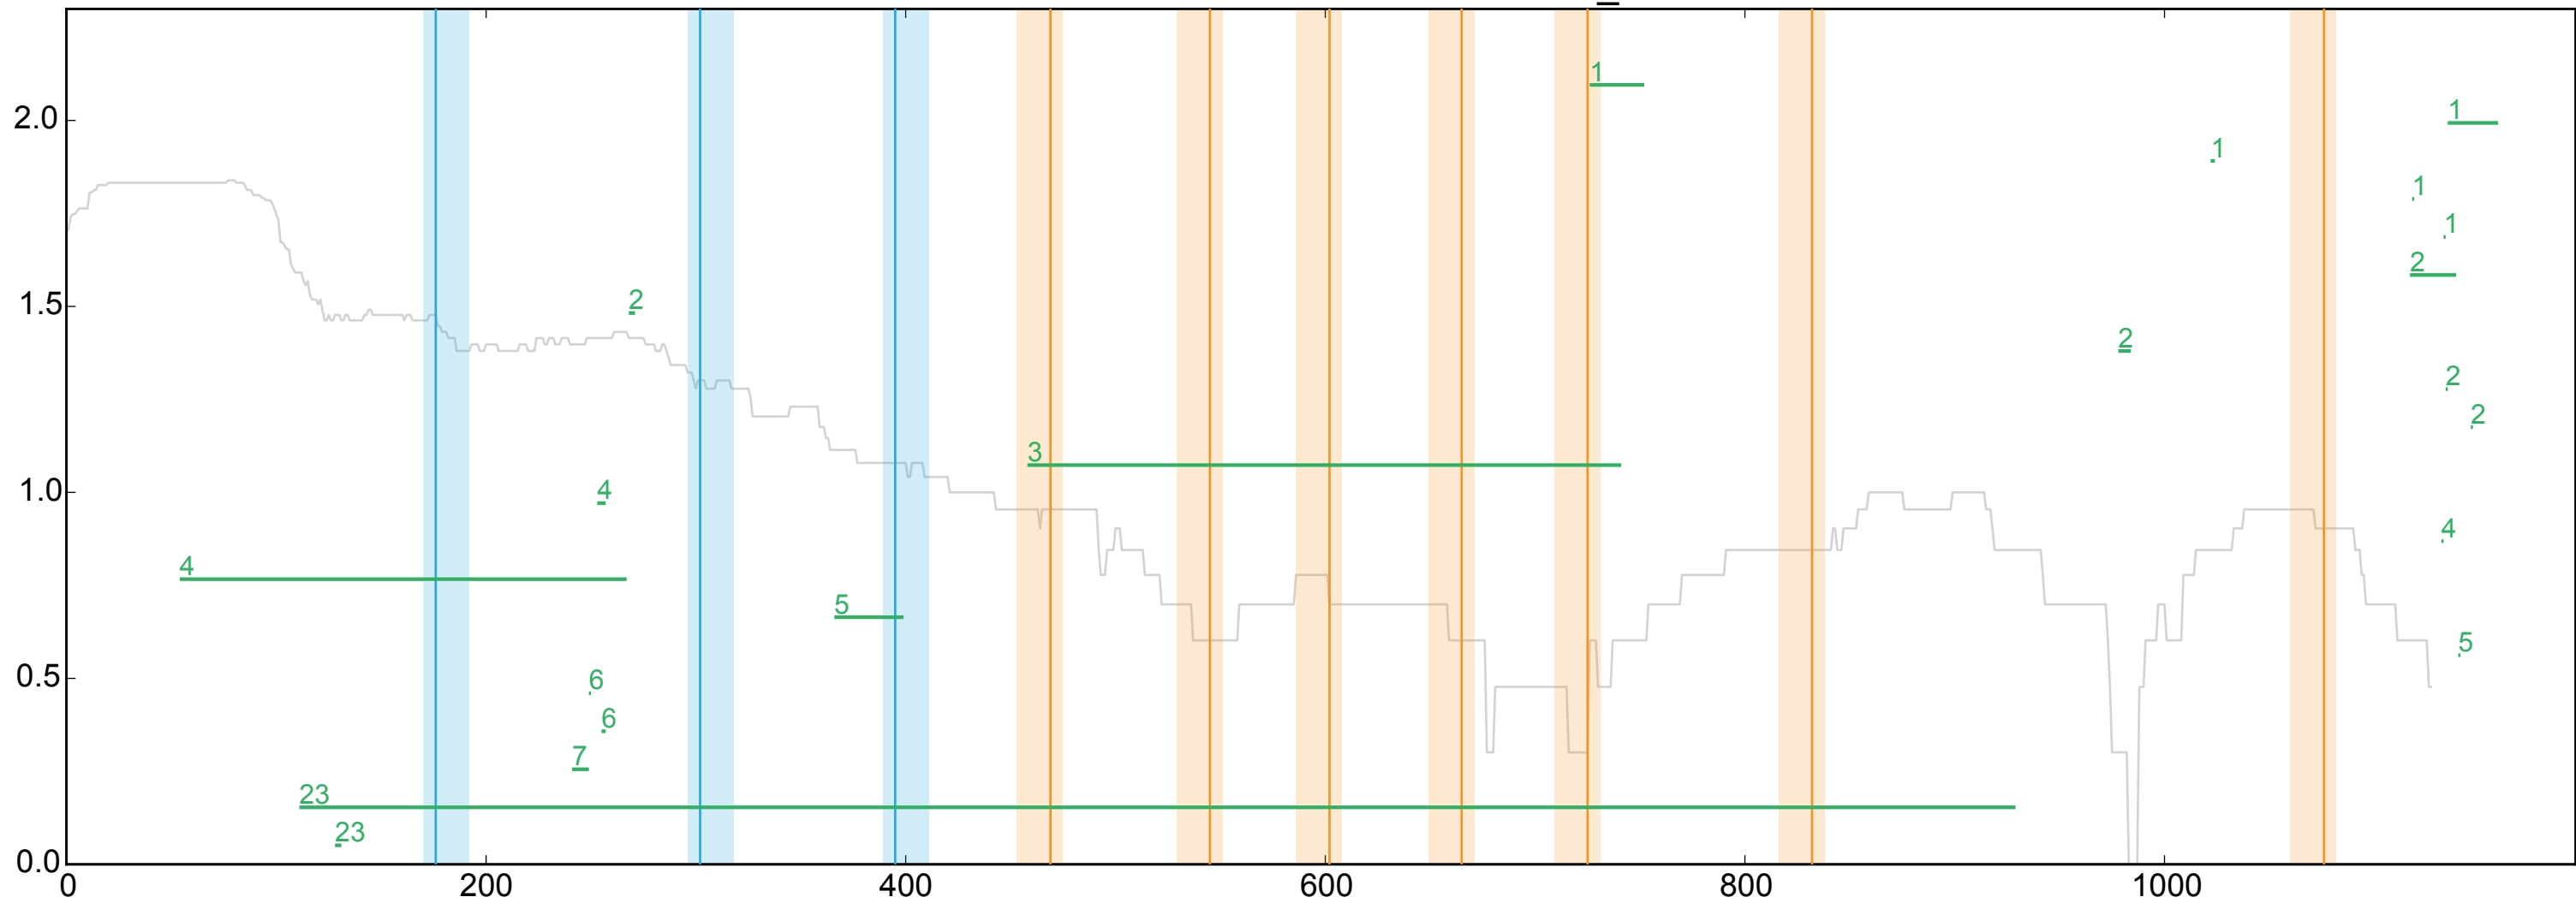

WT ENSDARG00000079475\_7

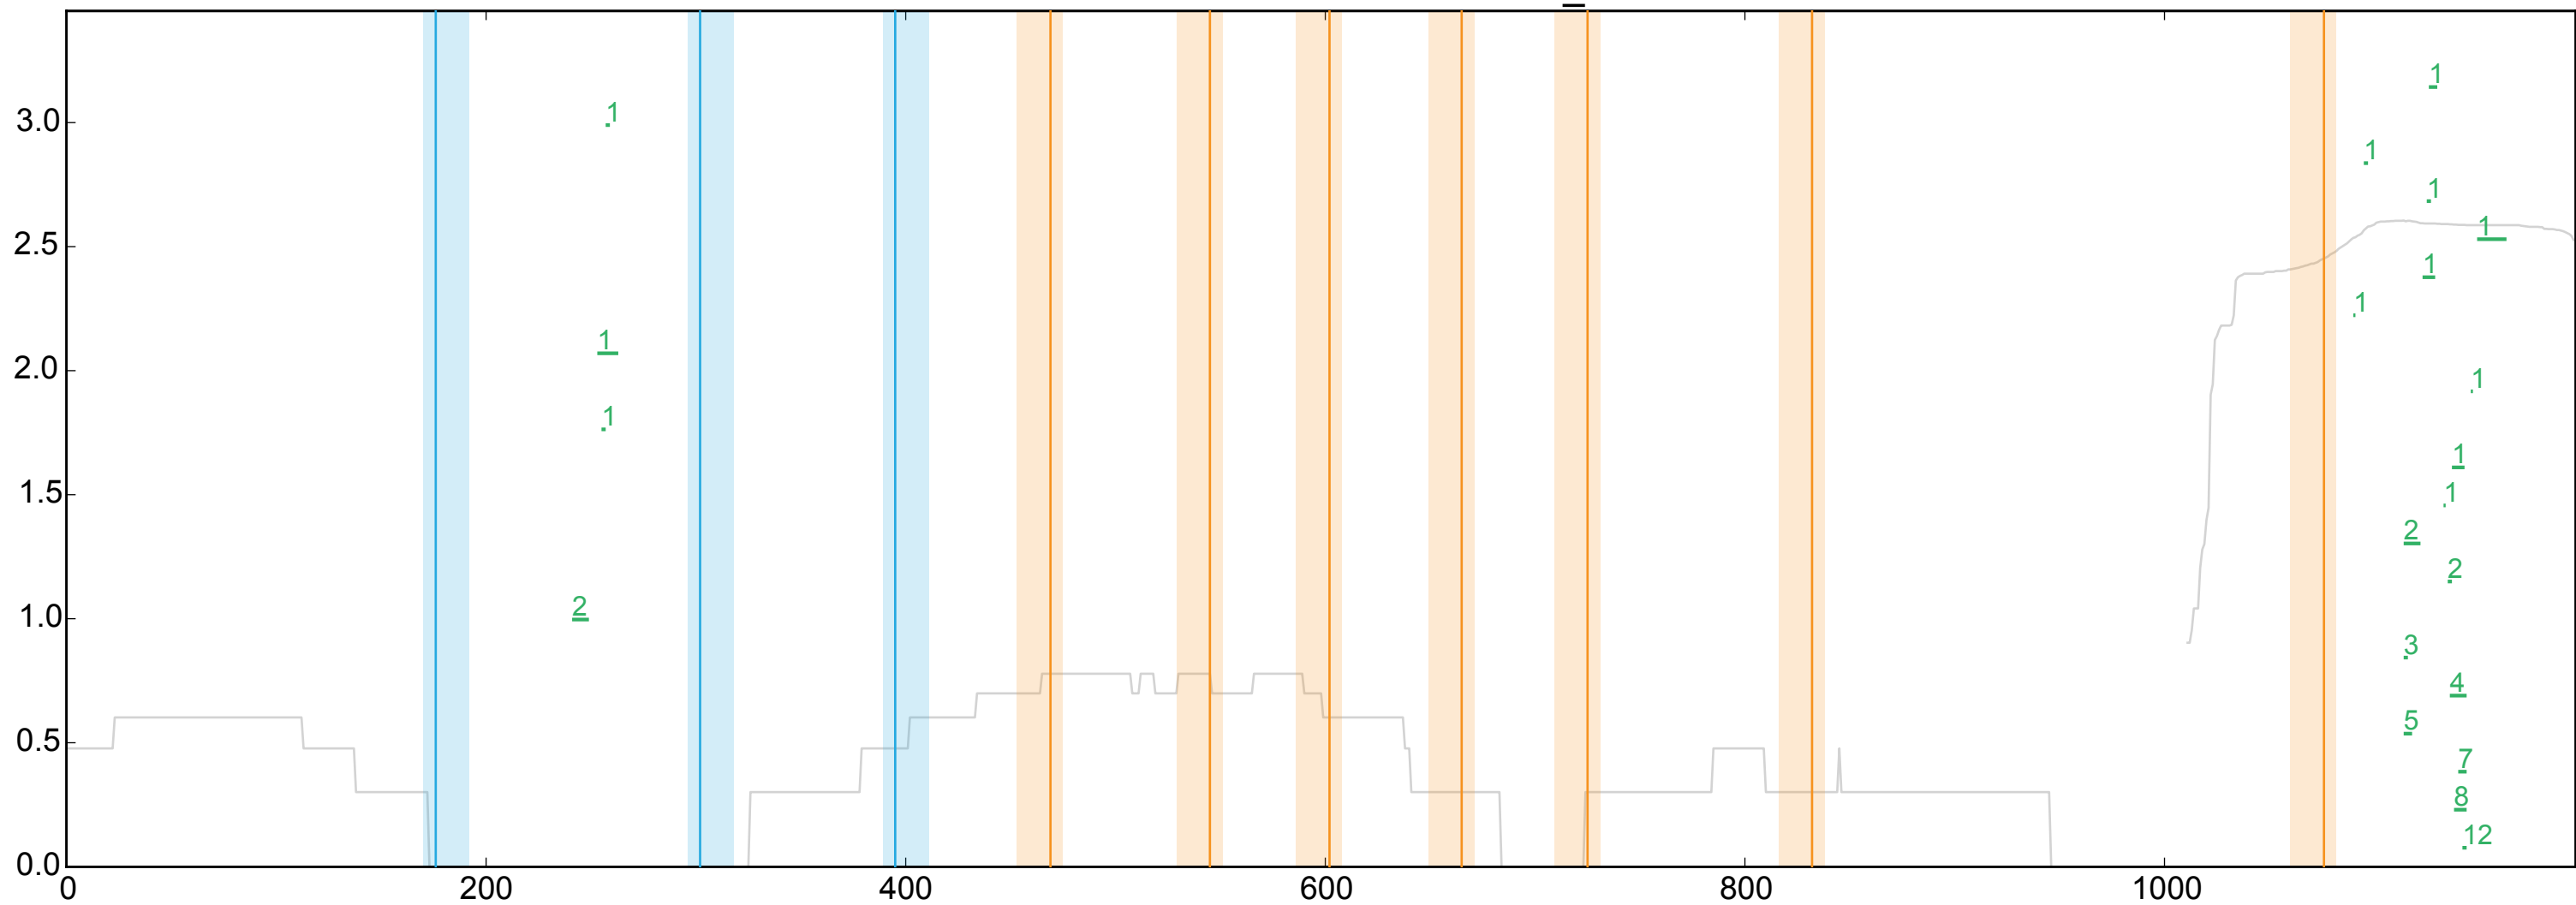



Mutant ENSDARG00000062646\_0

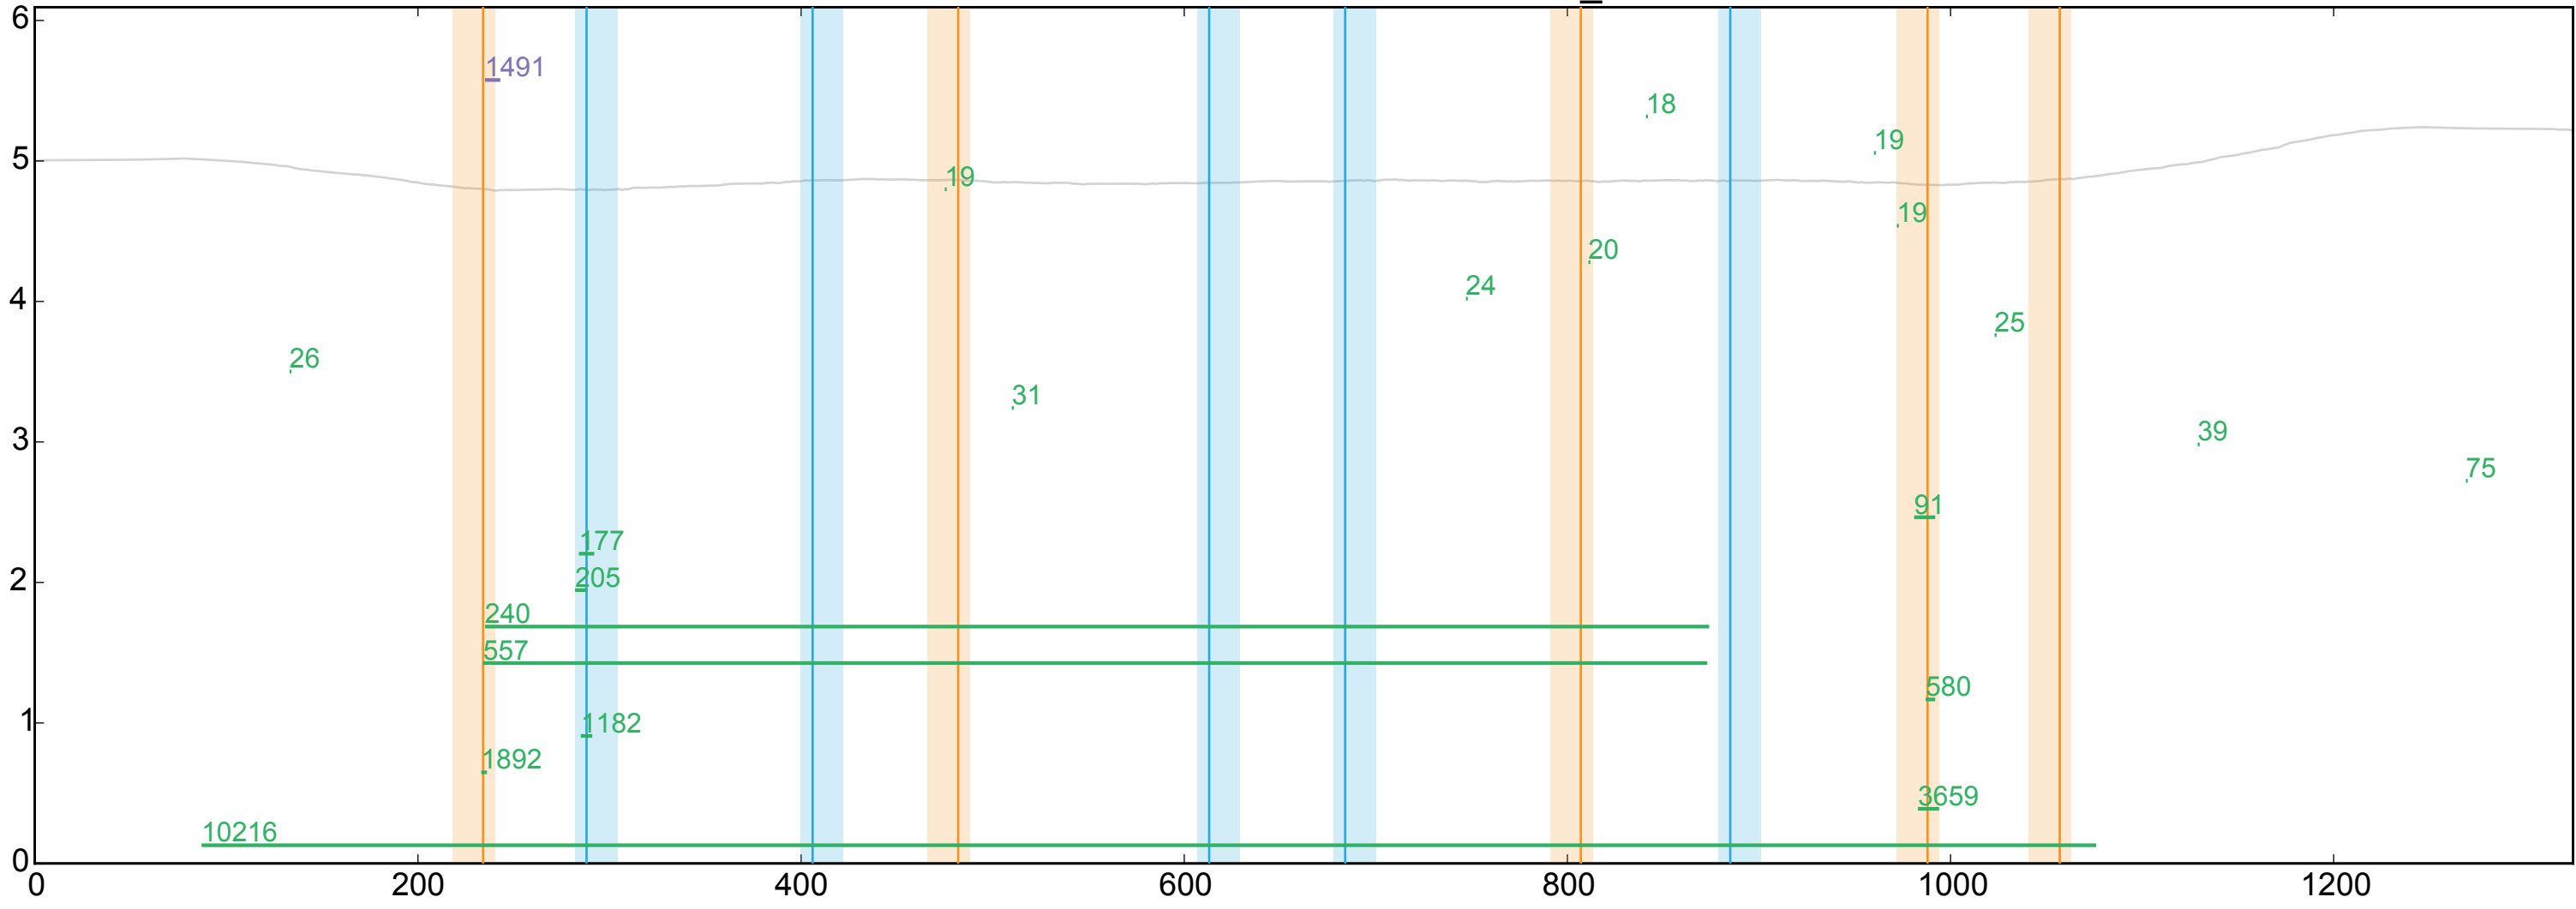

WT ENSDARG00000062646\_0

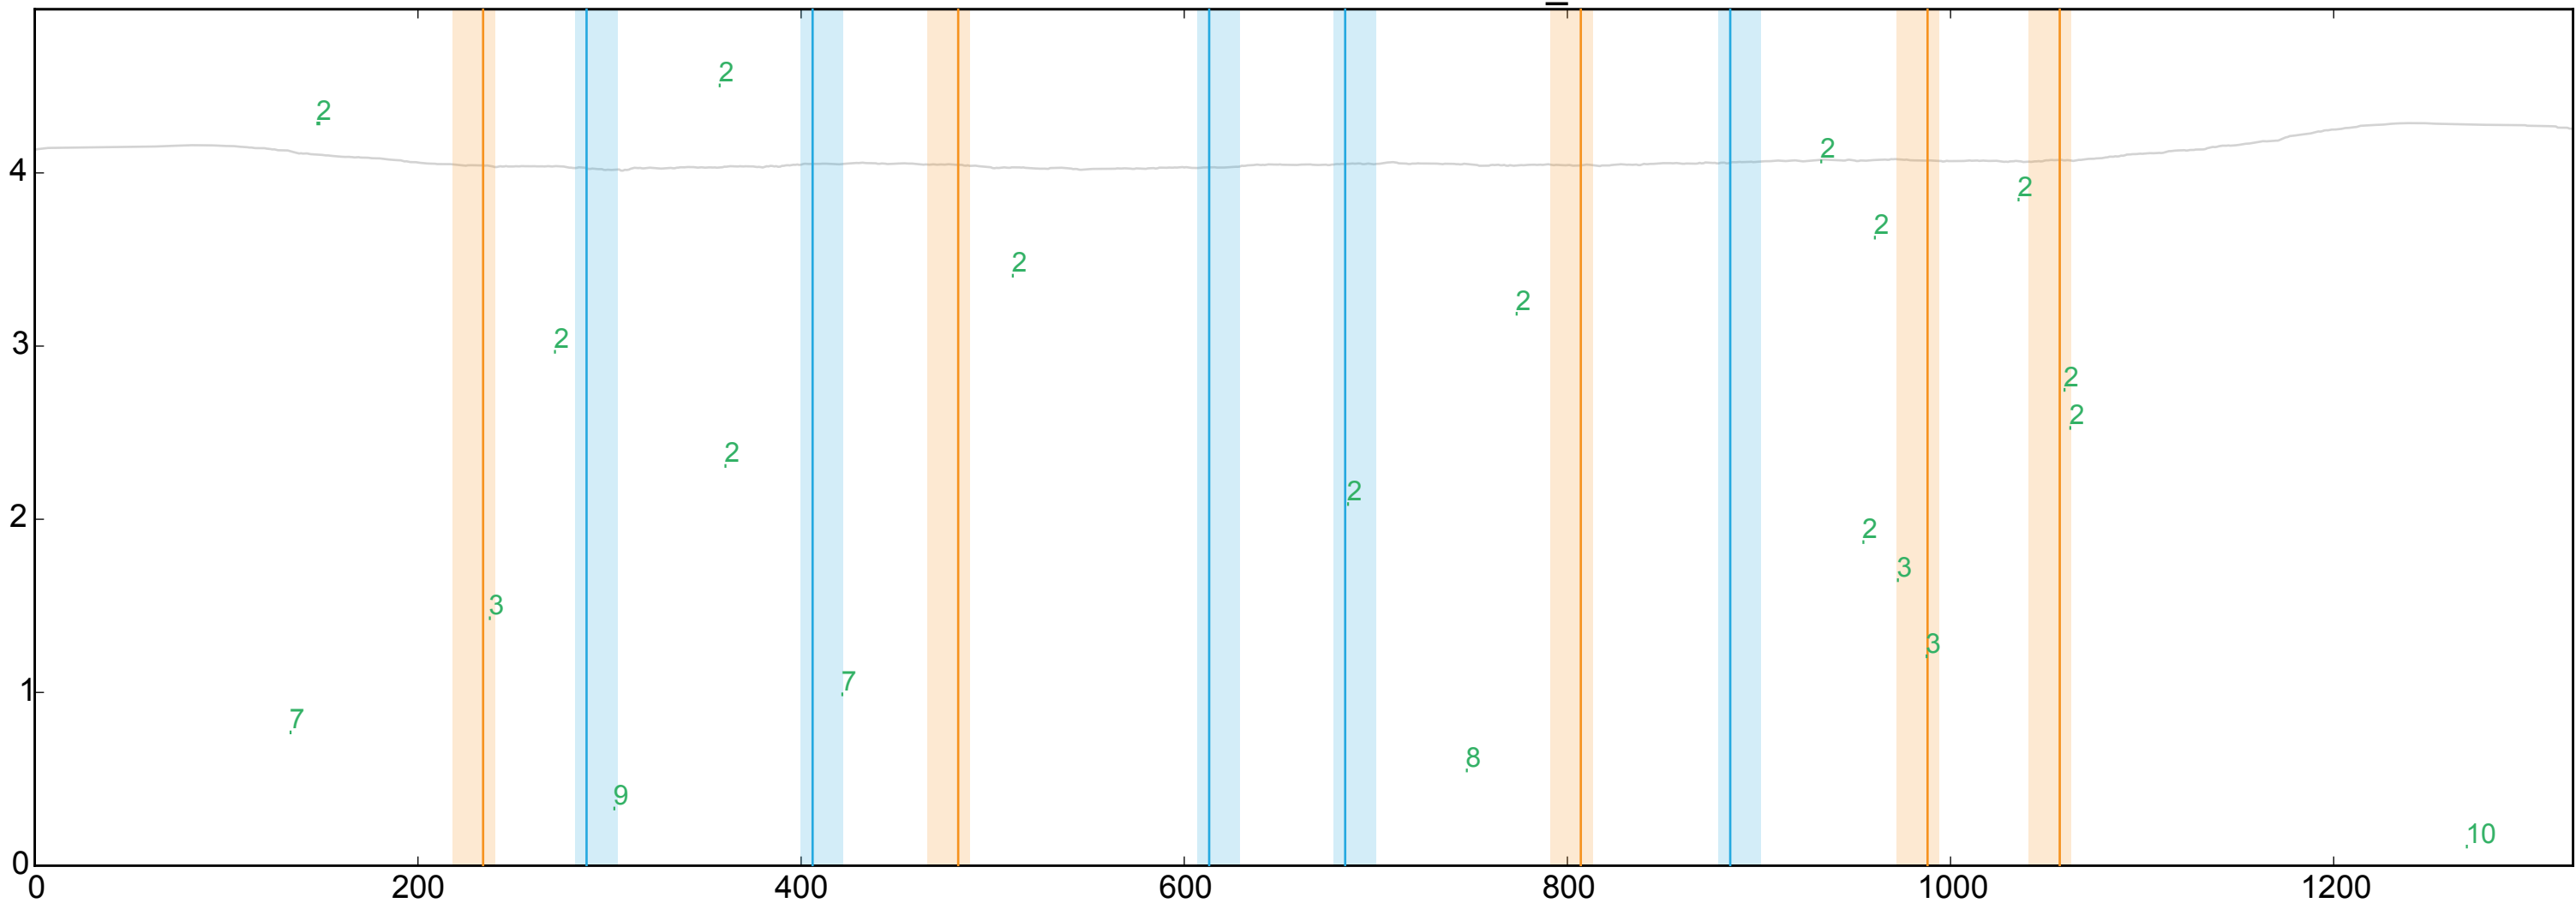

Mutant ENSDARG00000079850\_0

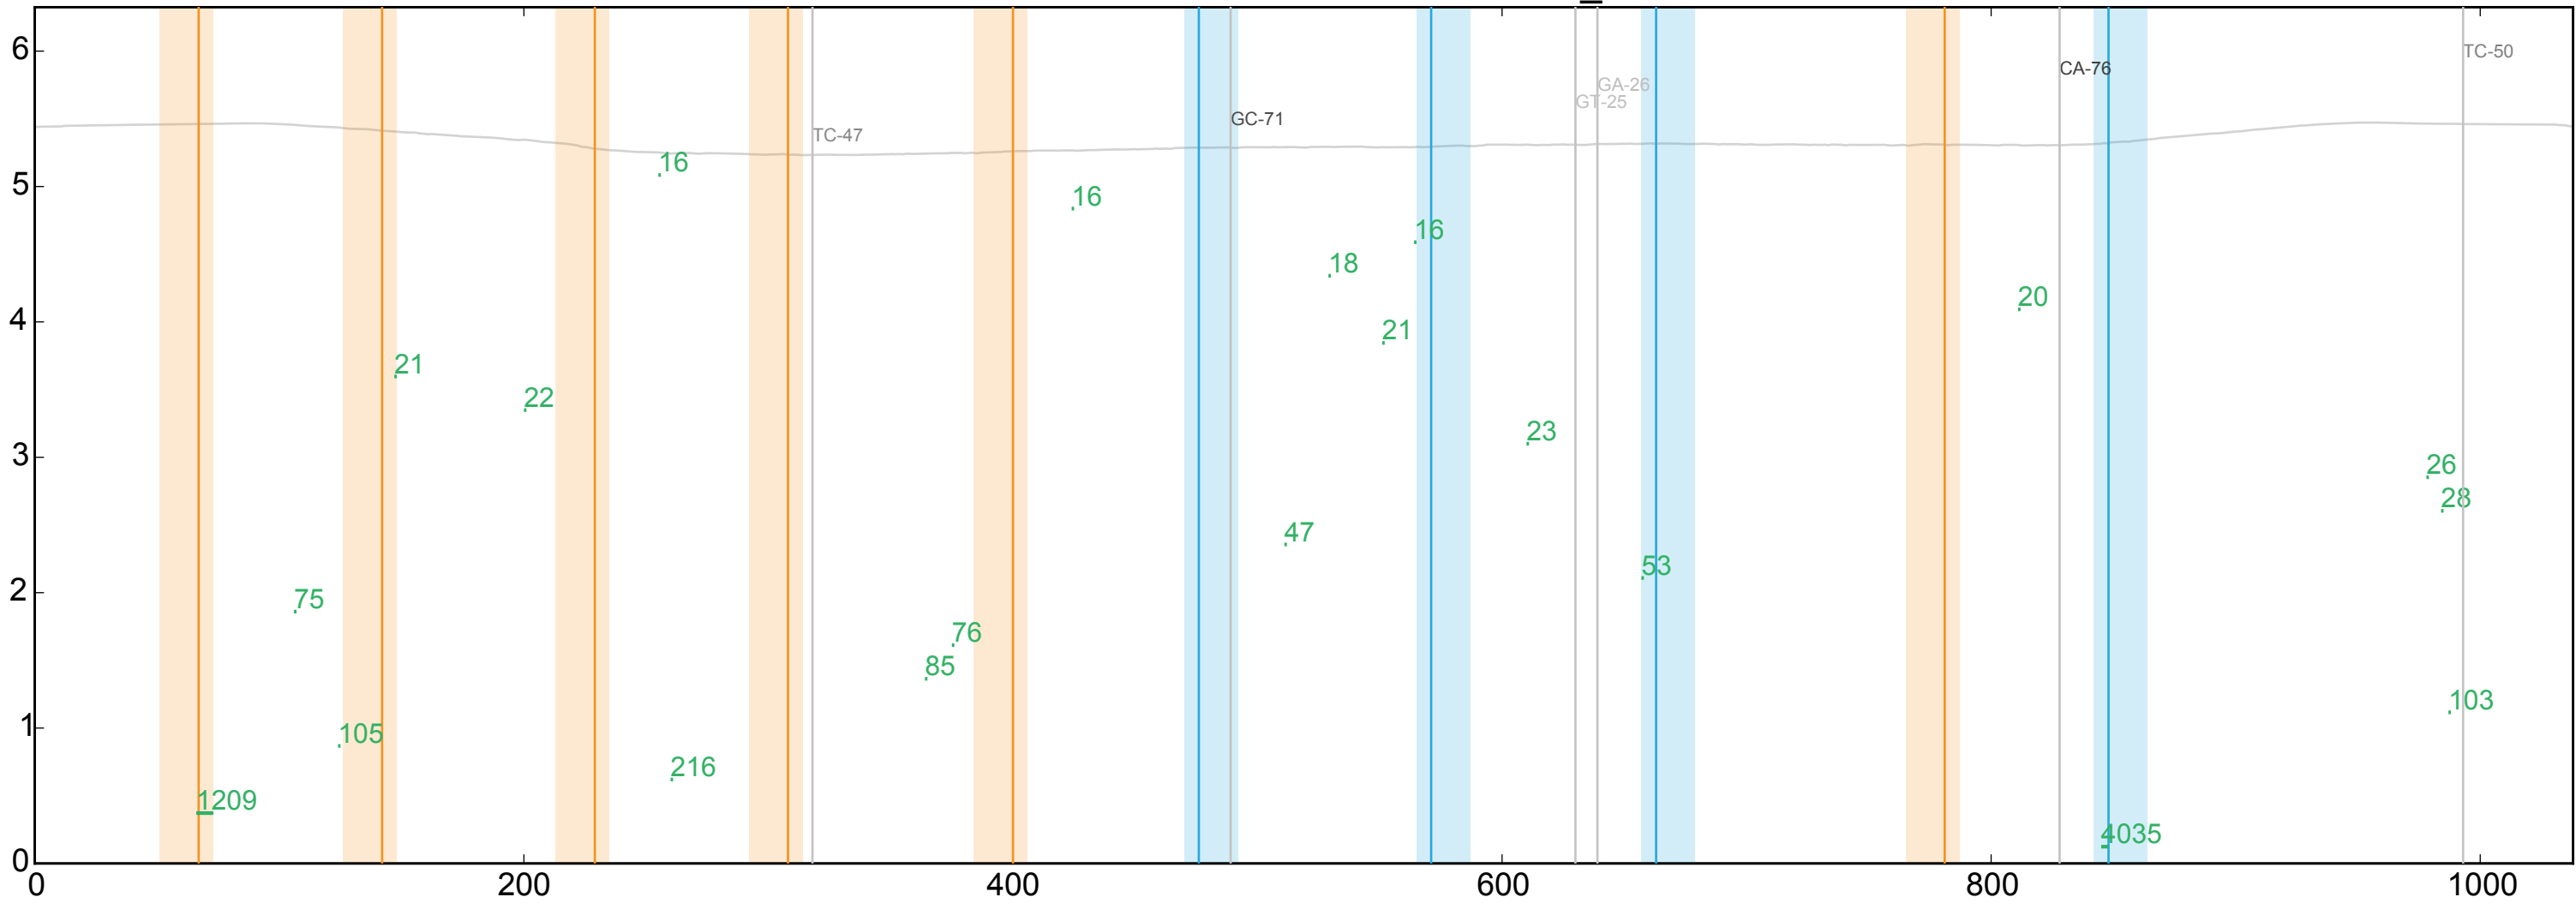

WT ENSDARG00000079850\_0

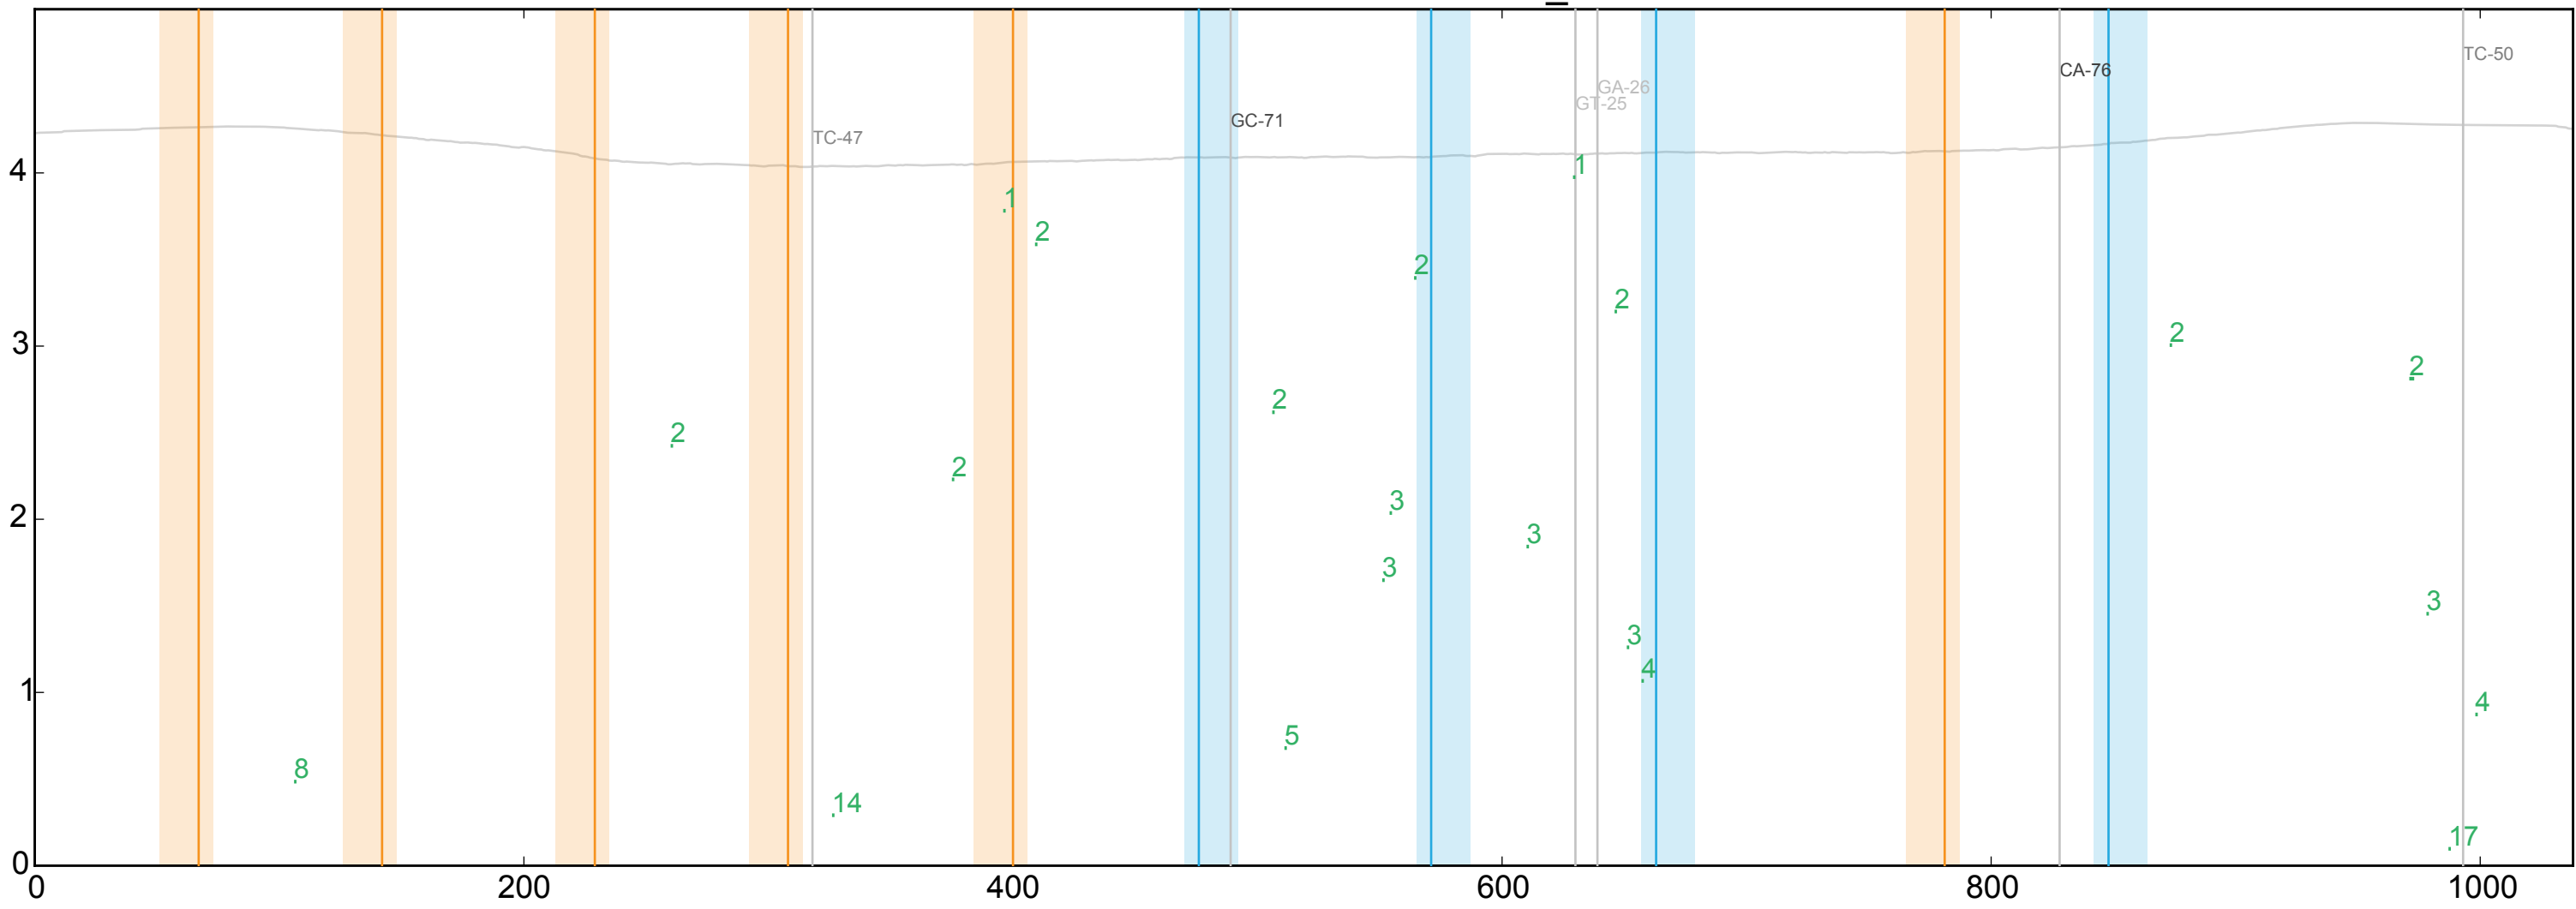

Mutant ENSDARG00000059961\_3

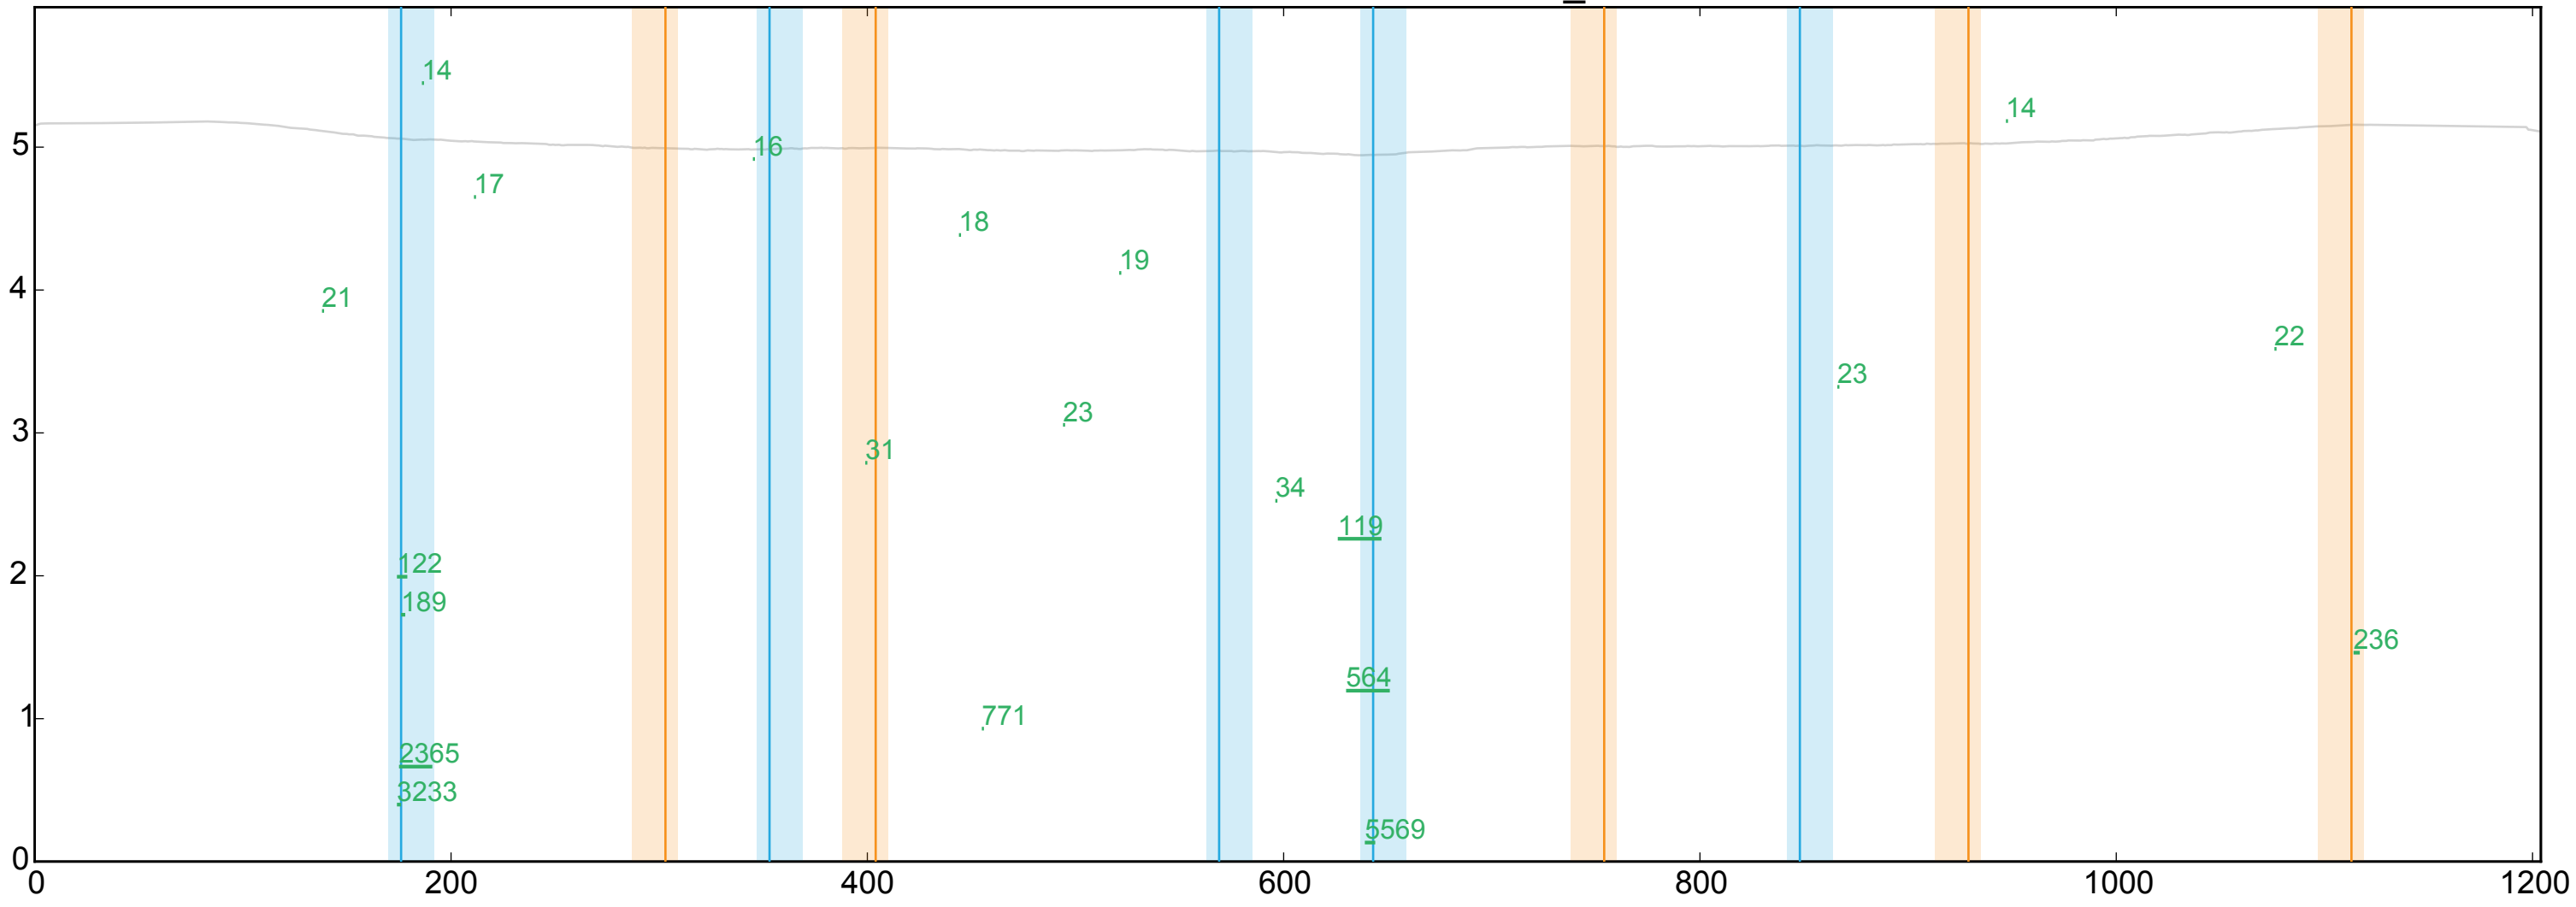

WT ENSDARG00000059961\_3

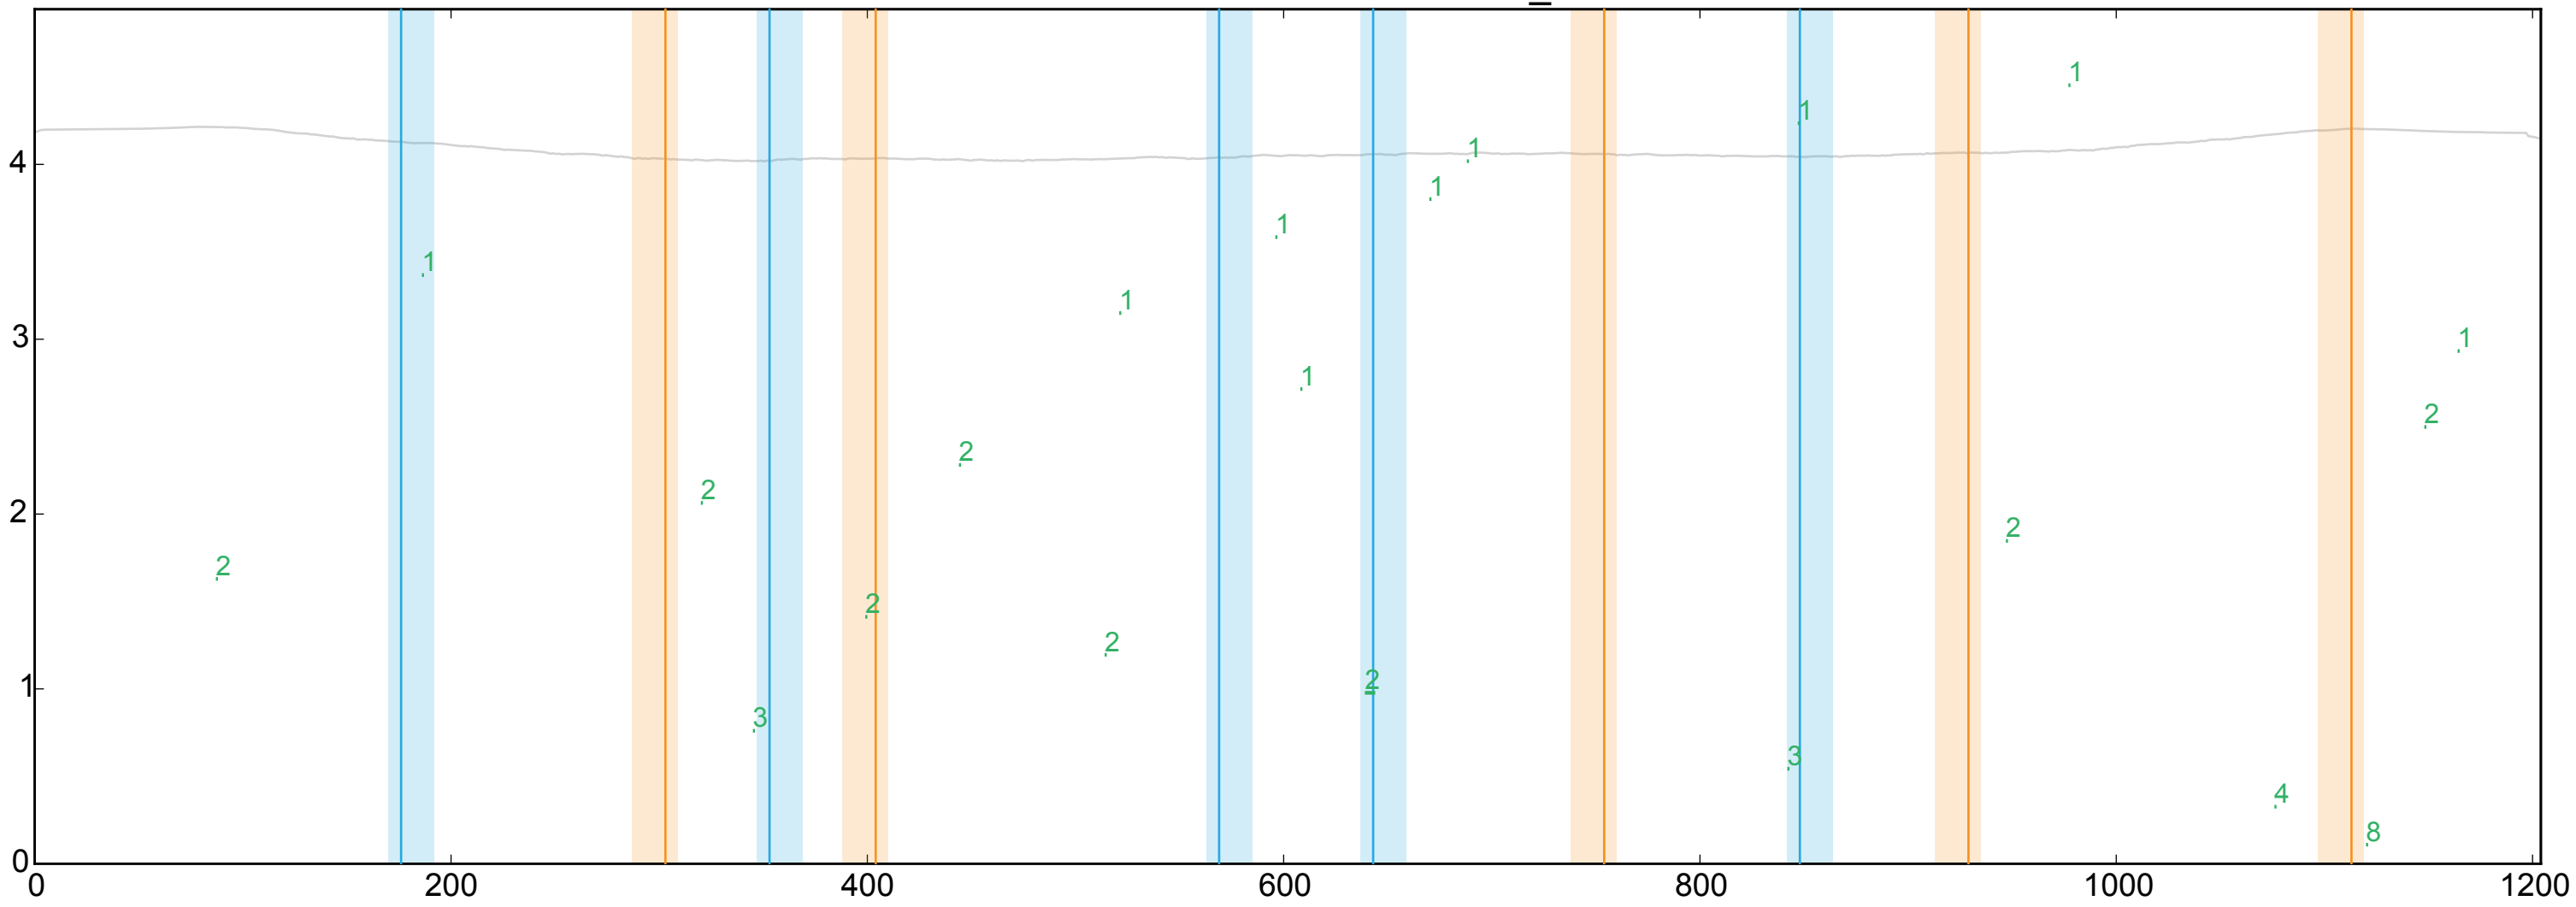



Mutant ENSDARG00000070419\_0

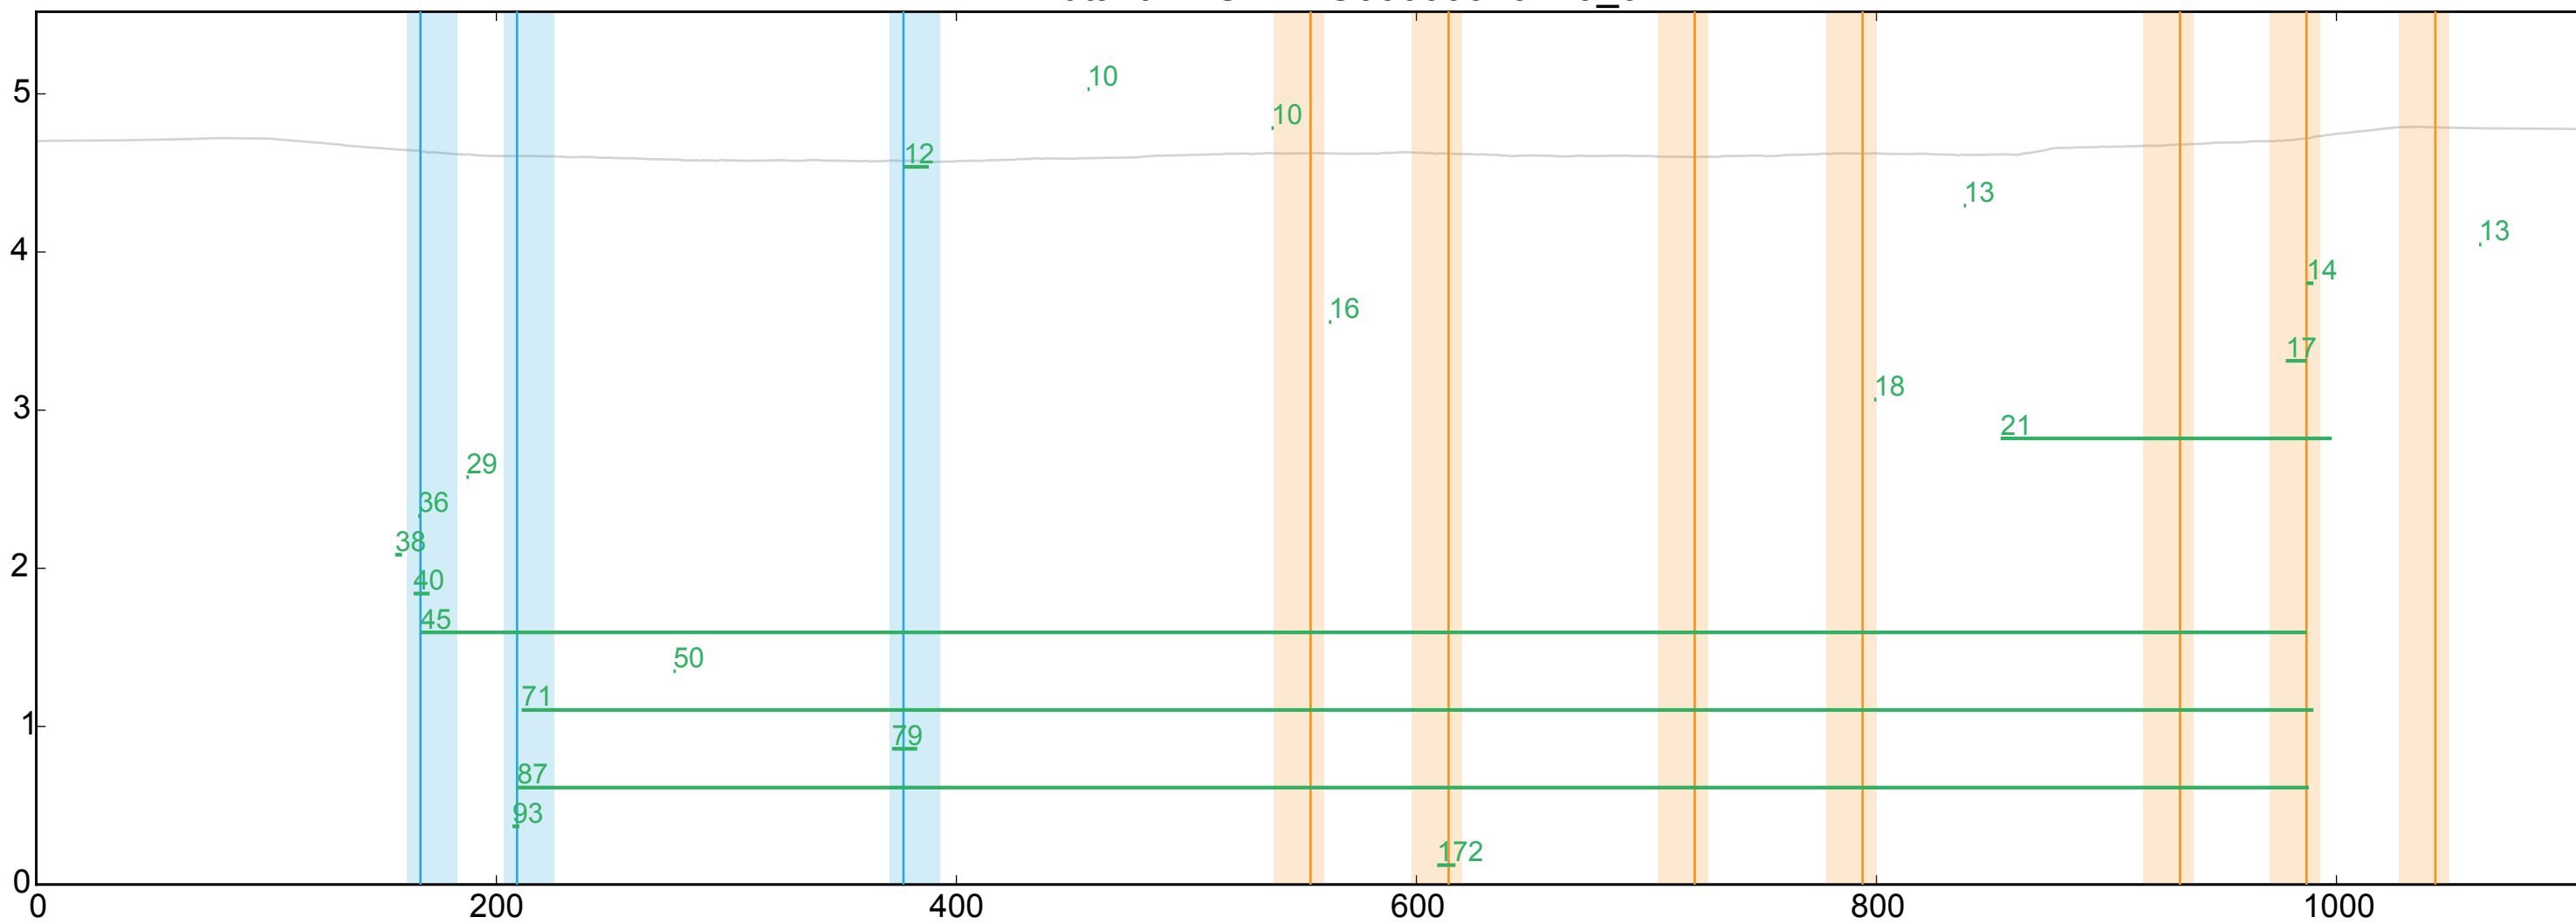

WT ENSDARG00000070419\_0

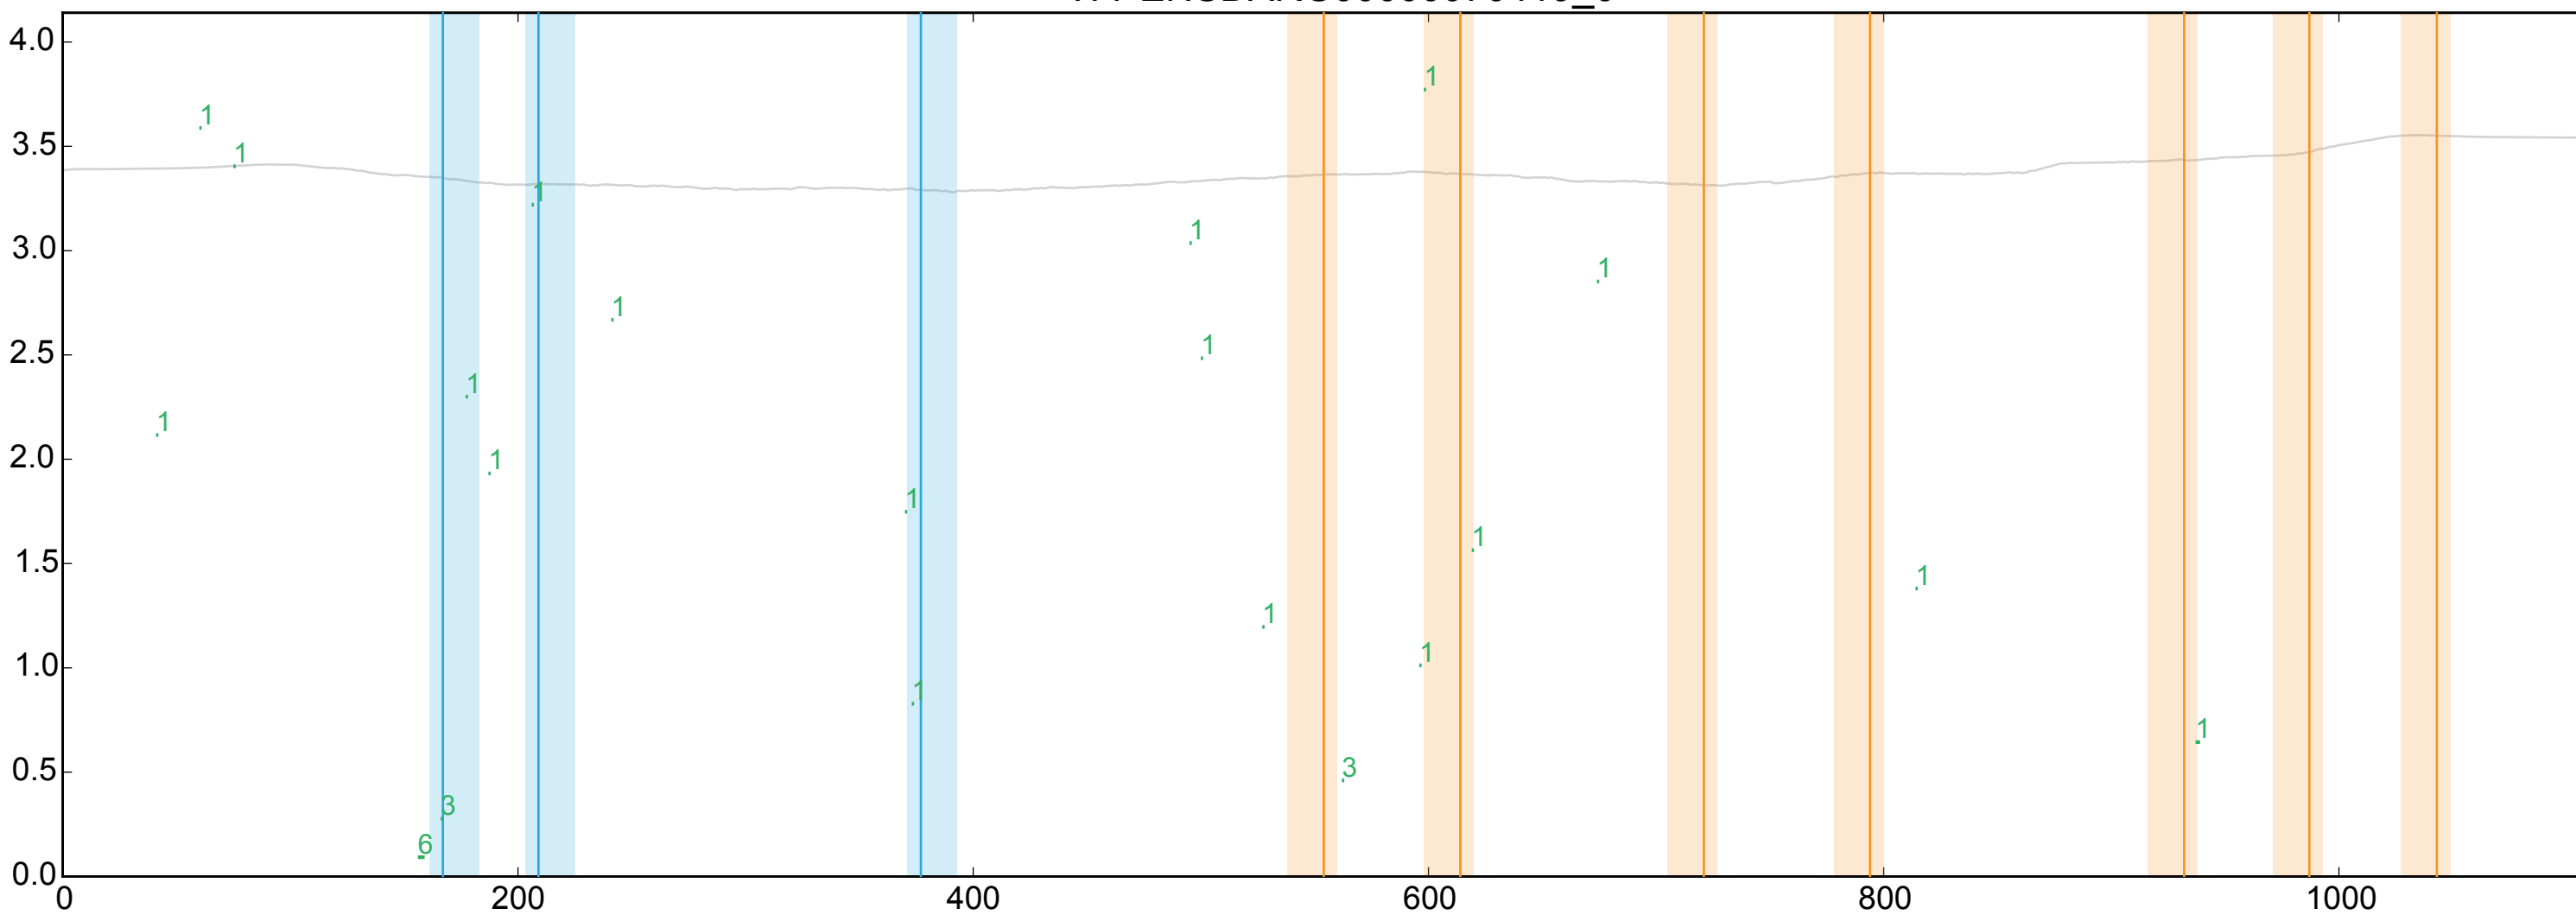

Mutant ENSDARG00000076045\_9

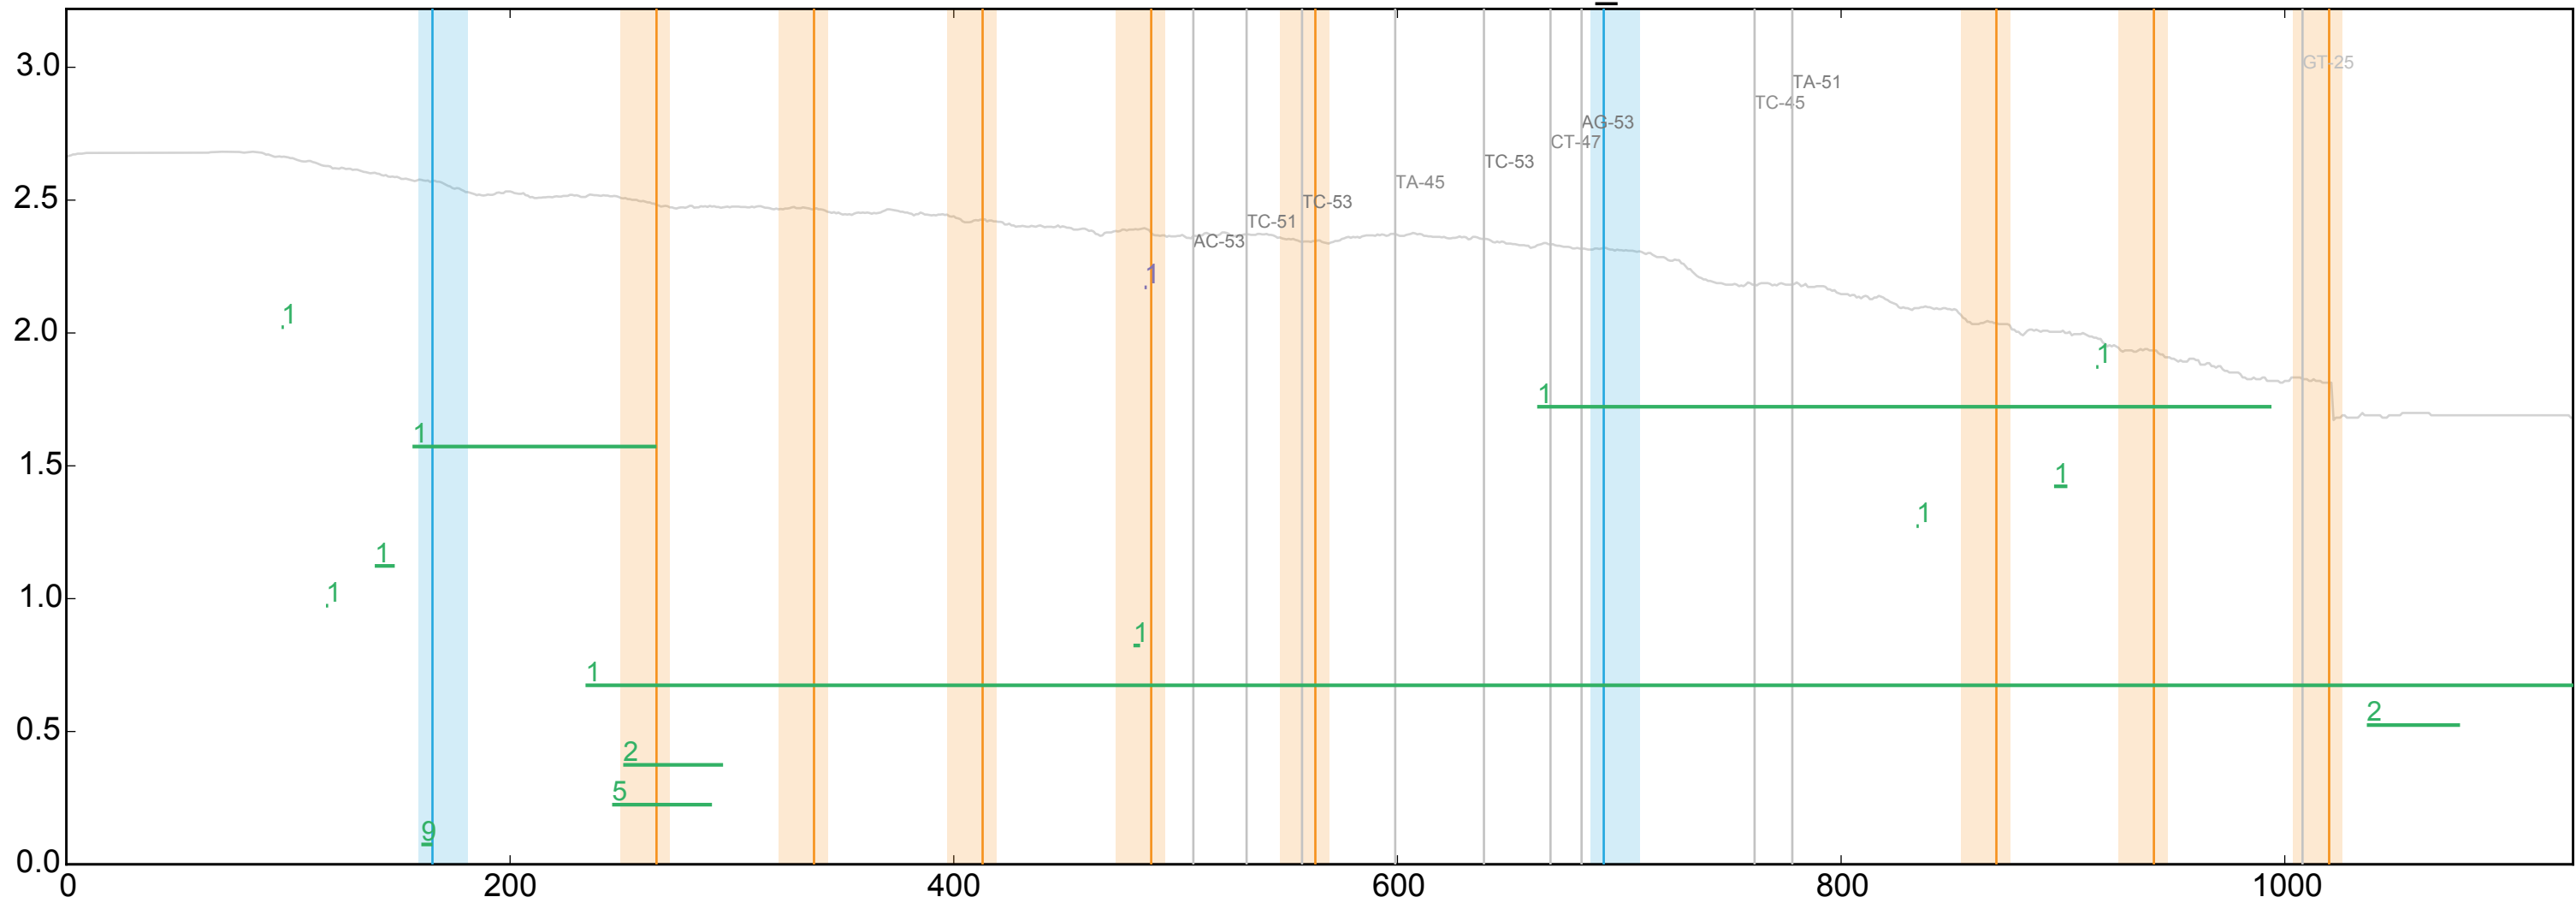

WT ENSDARG00000076045\_9

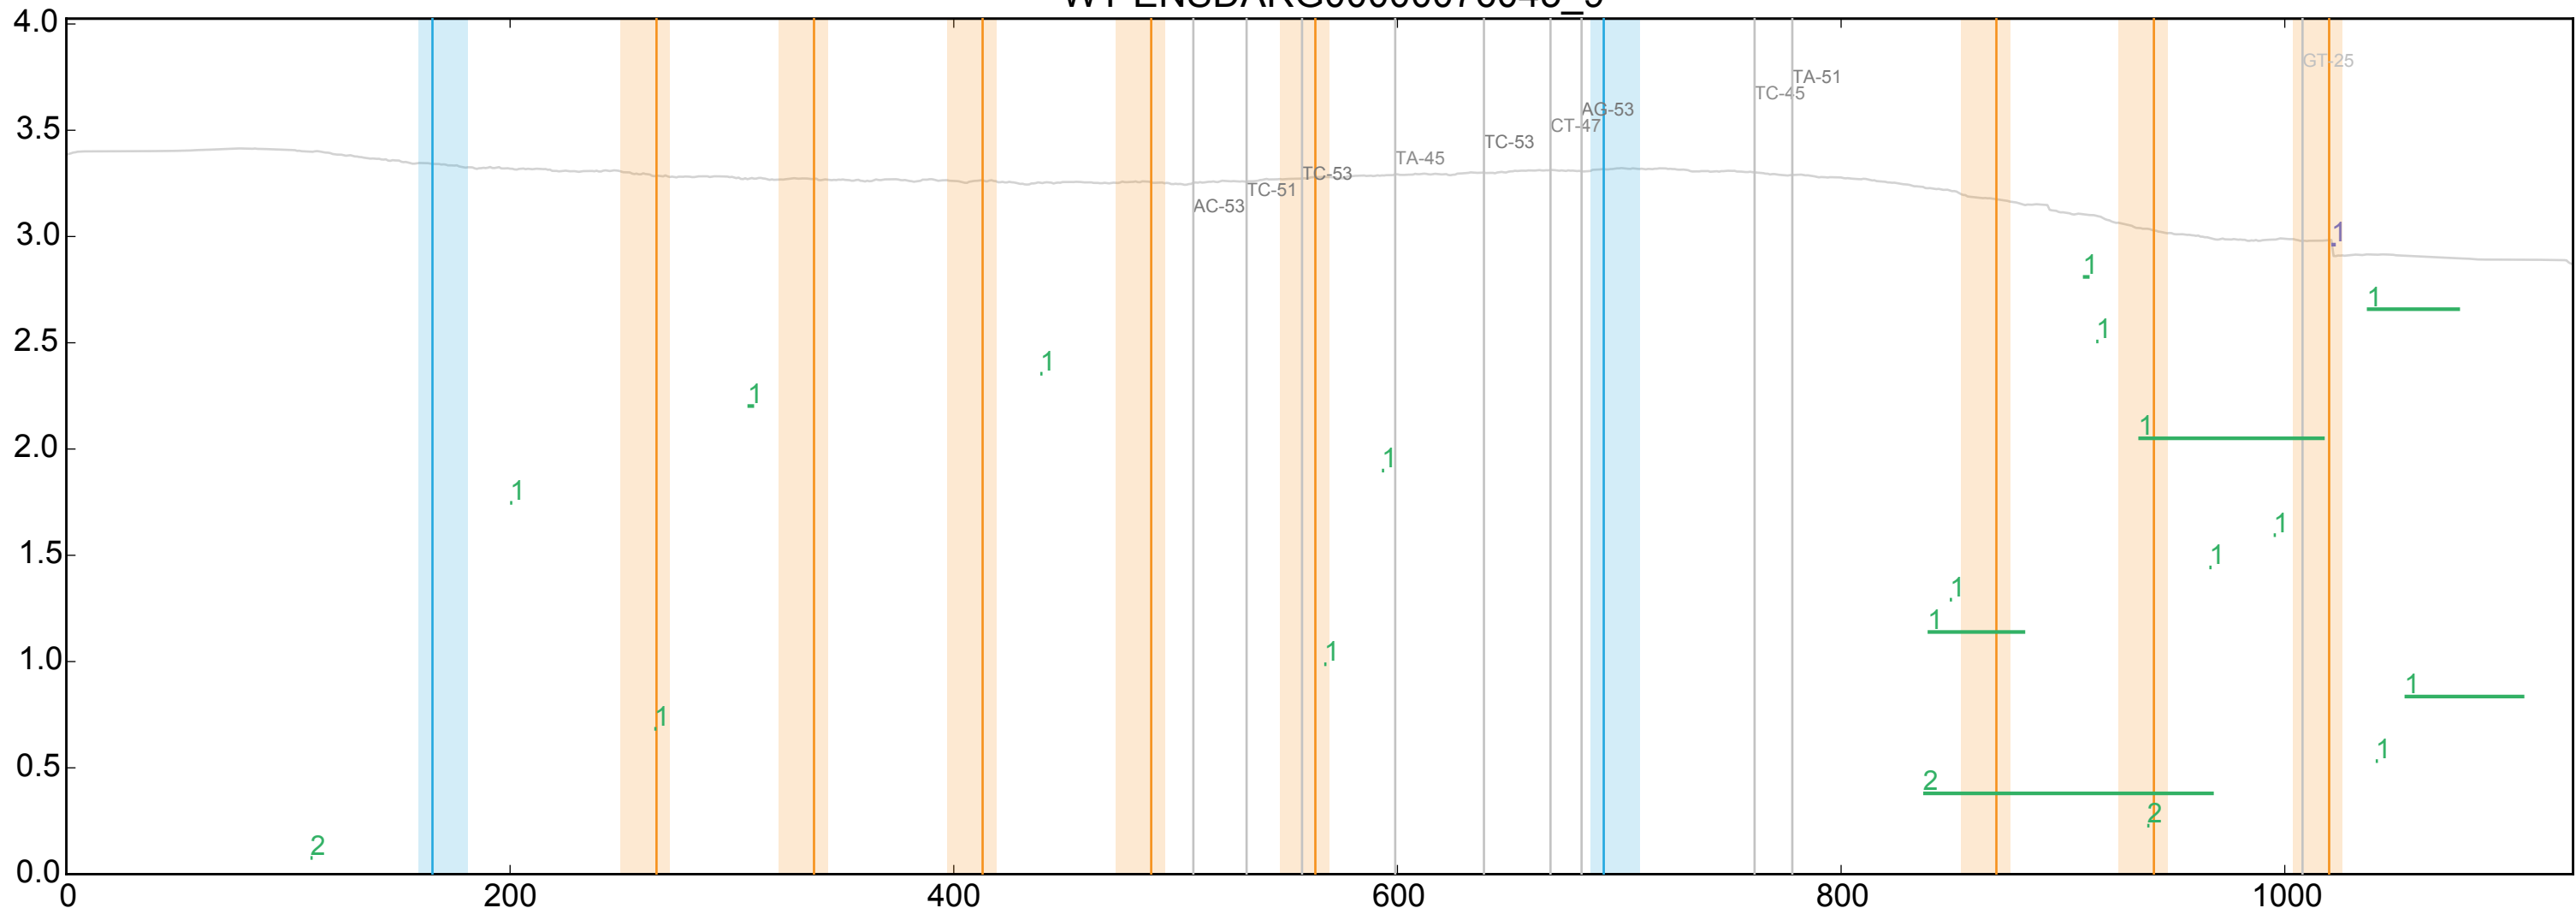

Mutant ENSDARG00000029472\_5

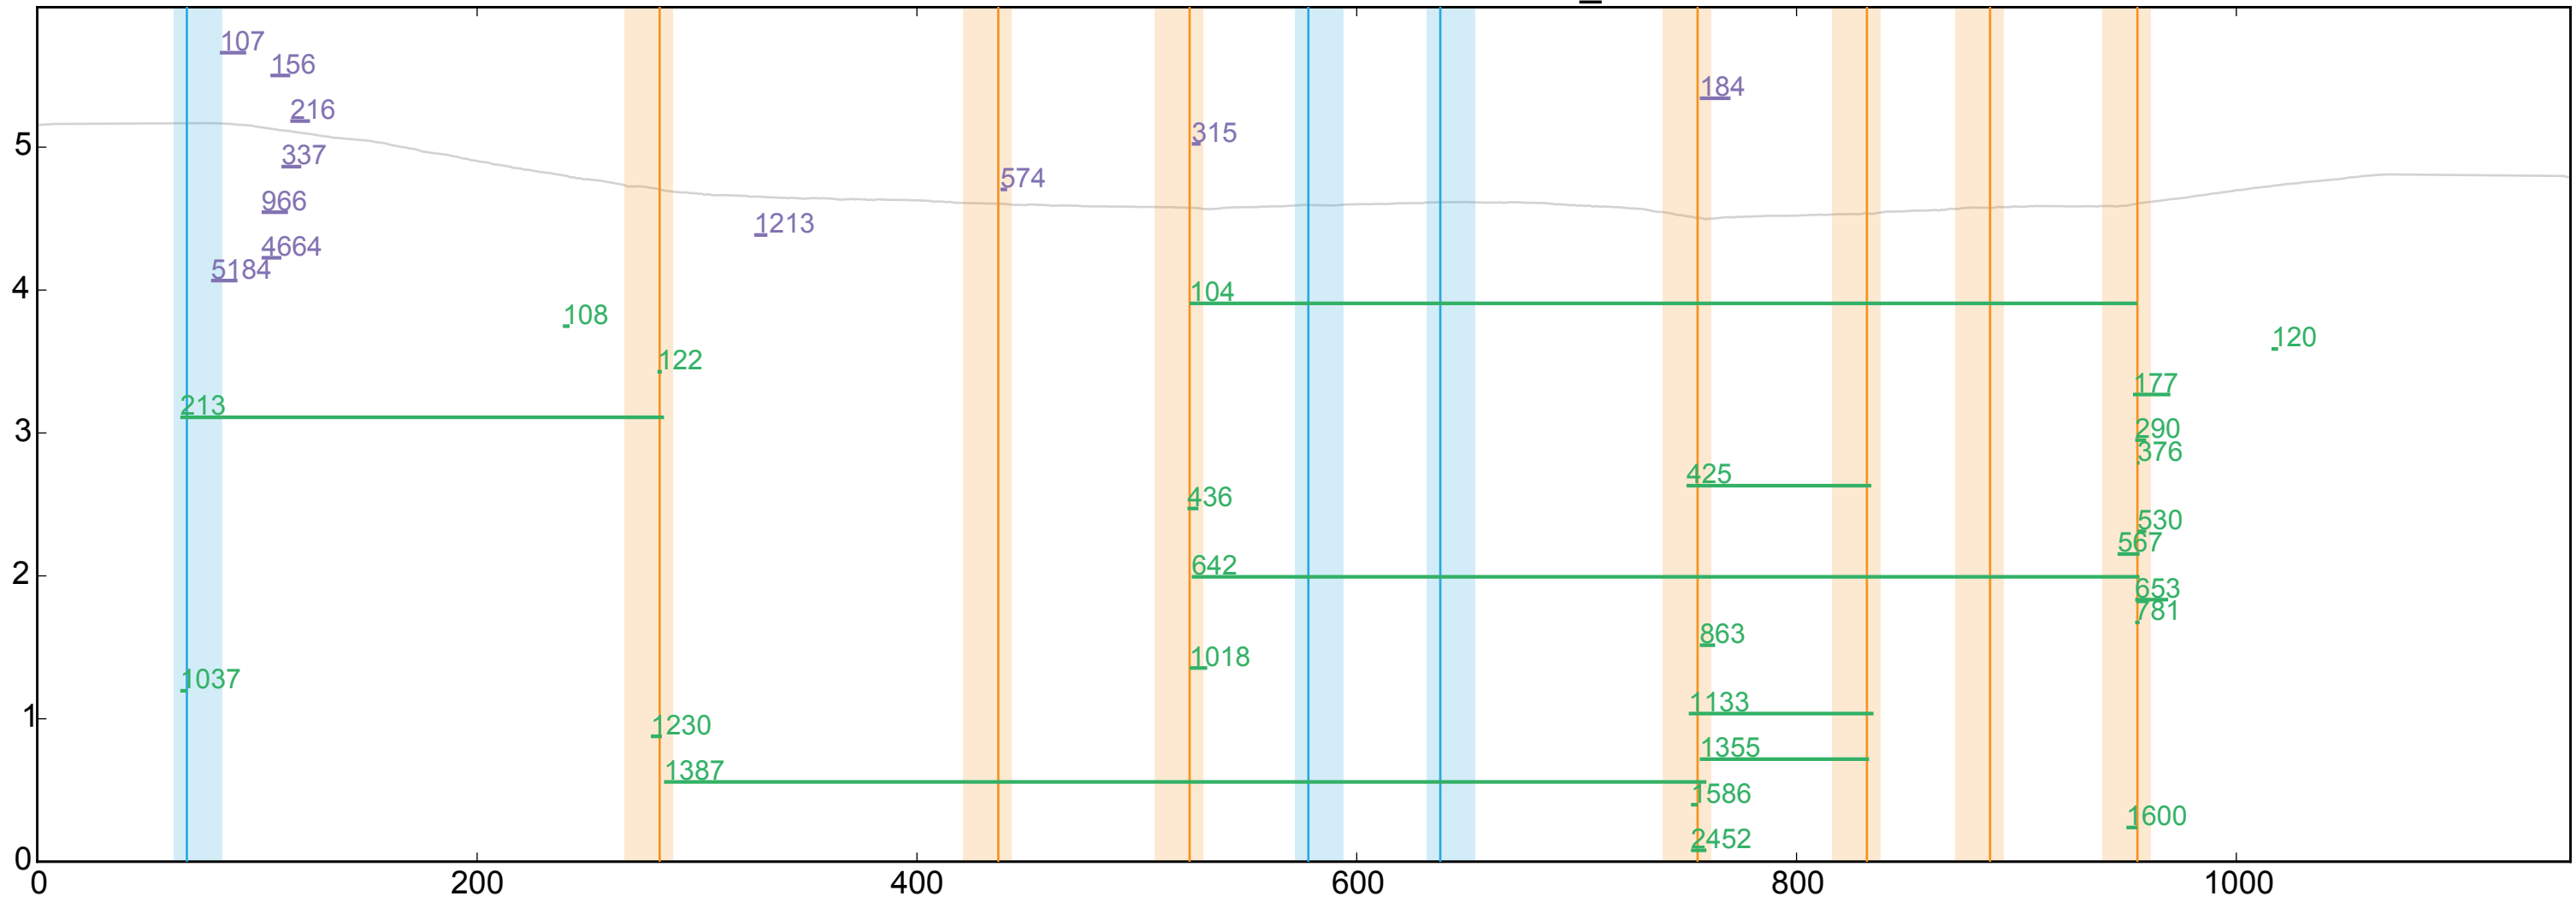

WT ENSDARG00000029472\_5

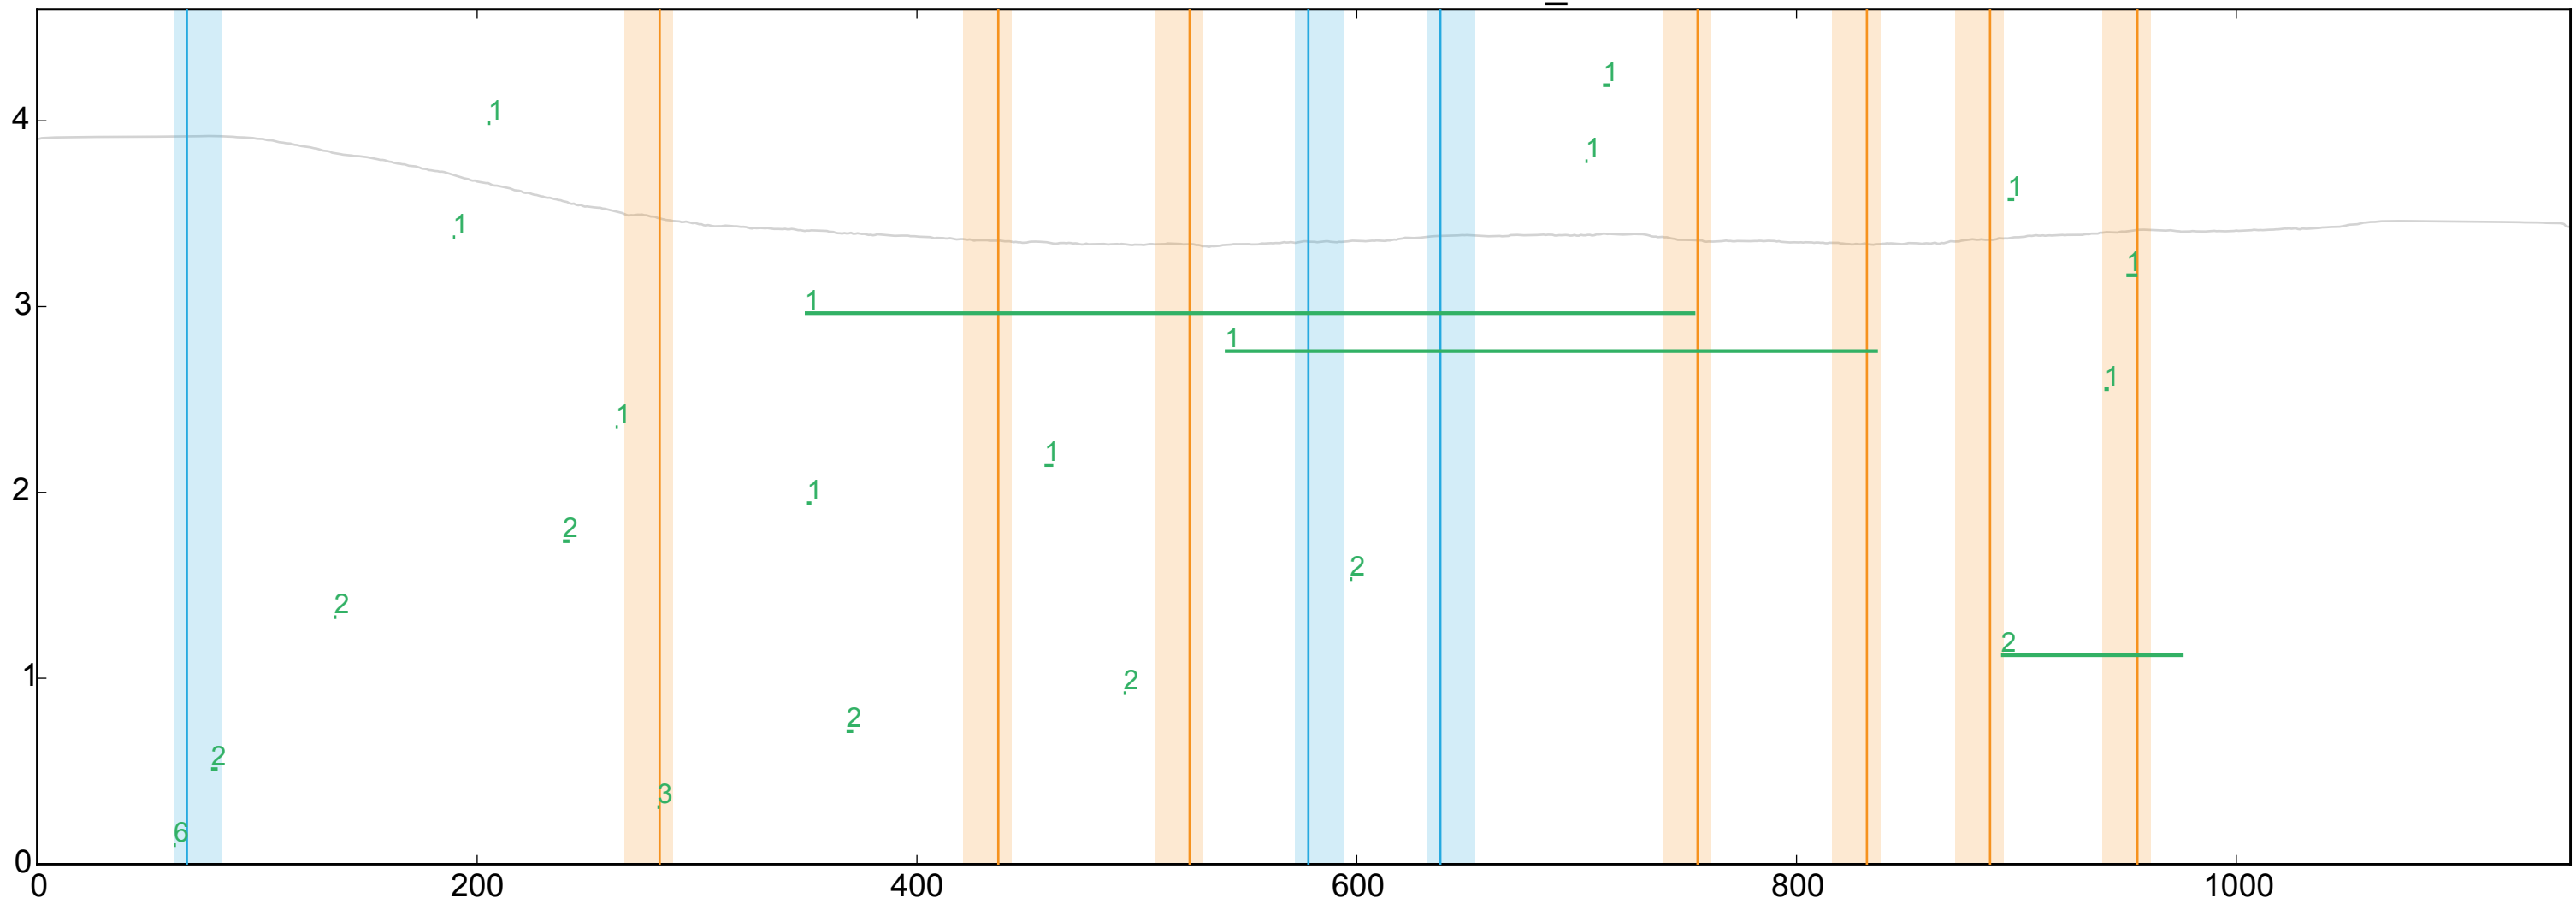

Mutant ENSDARG00000076485\_12

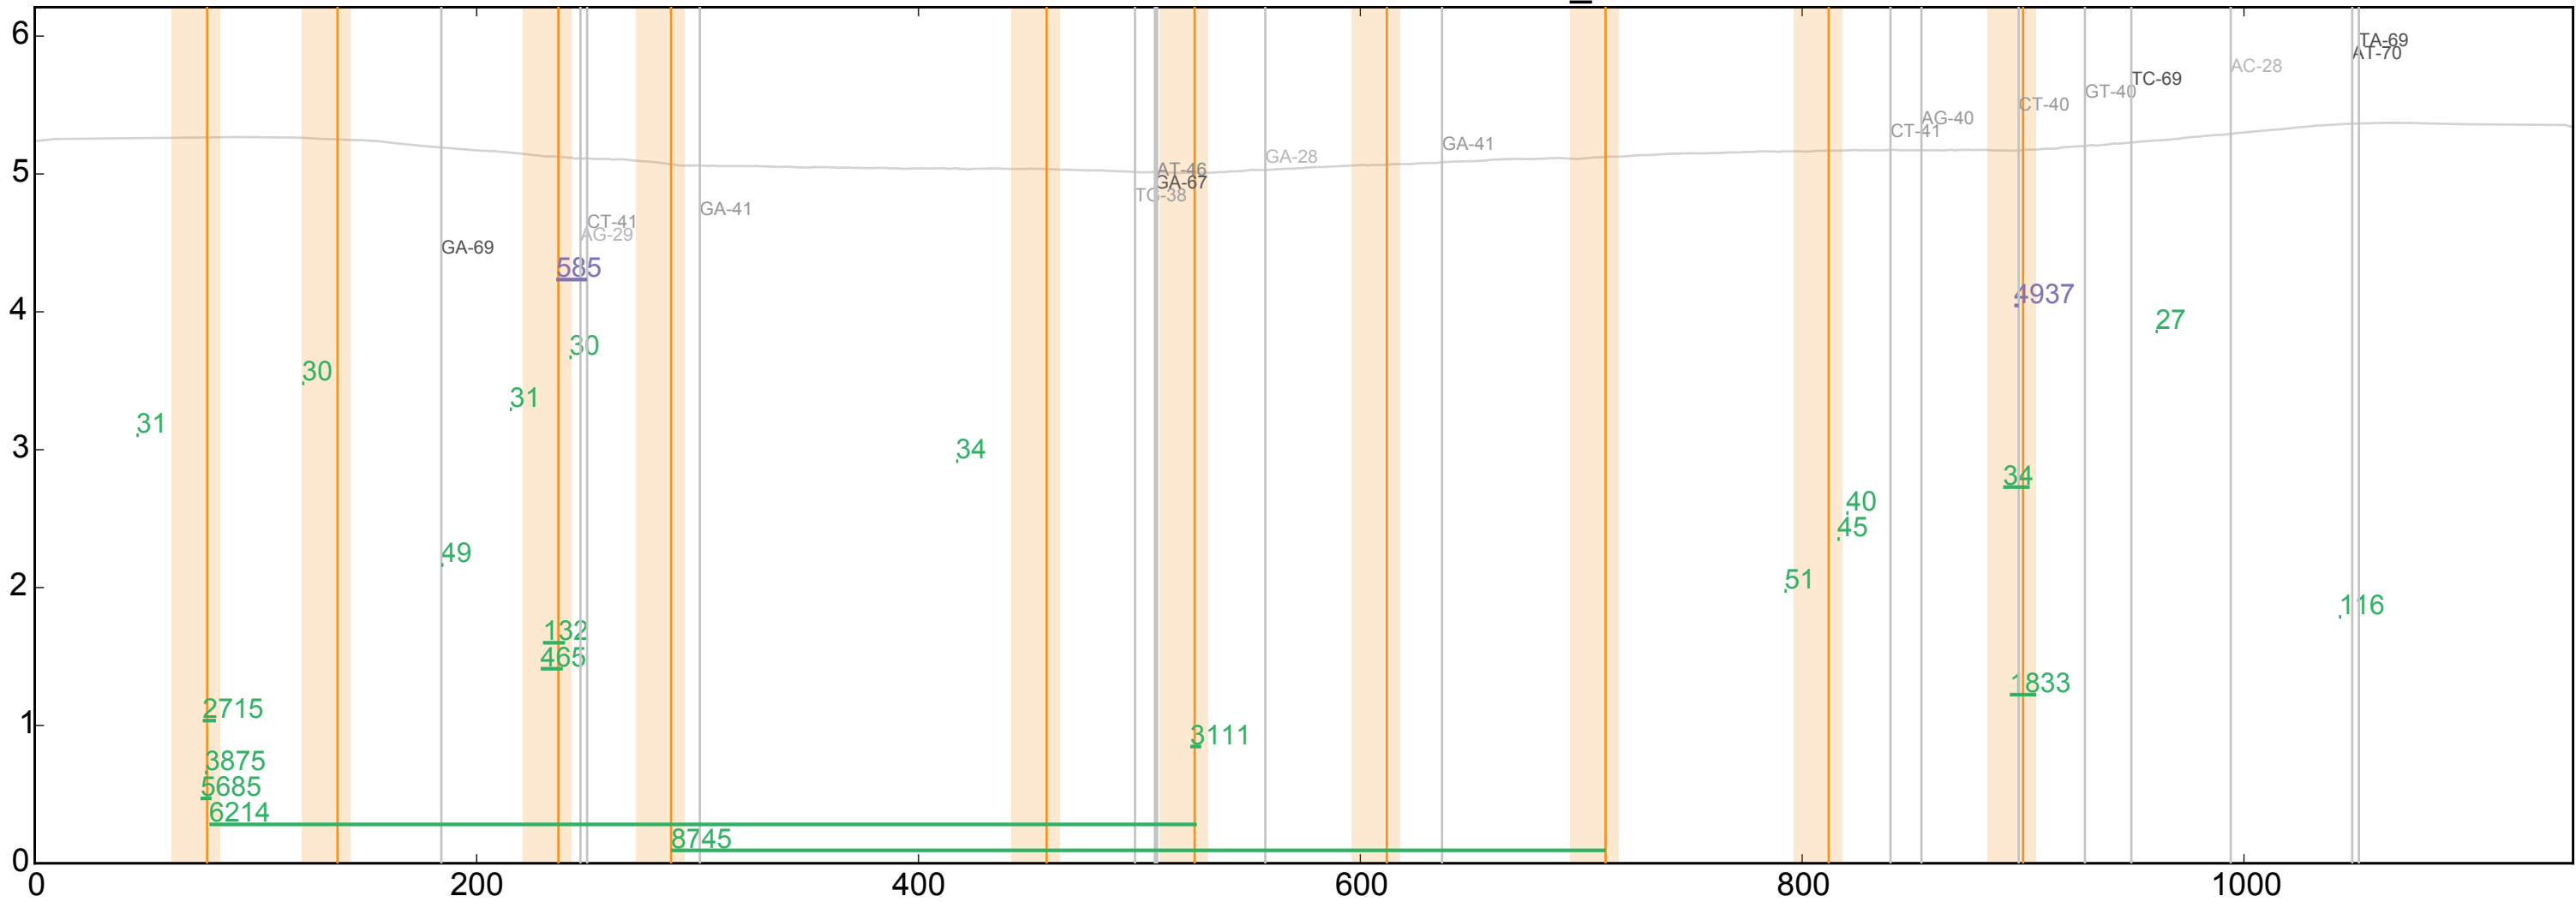

WT ENSDARG00000076485\_12

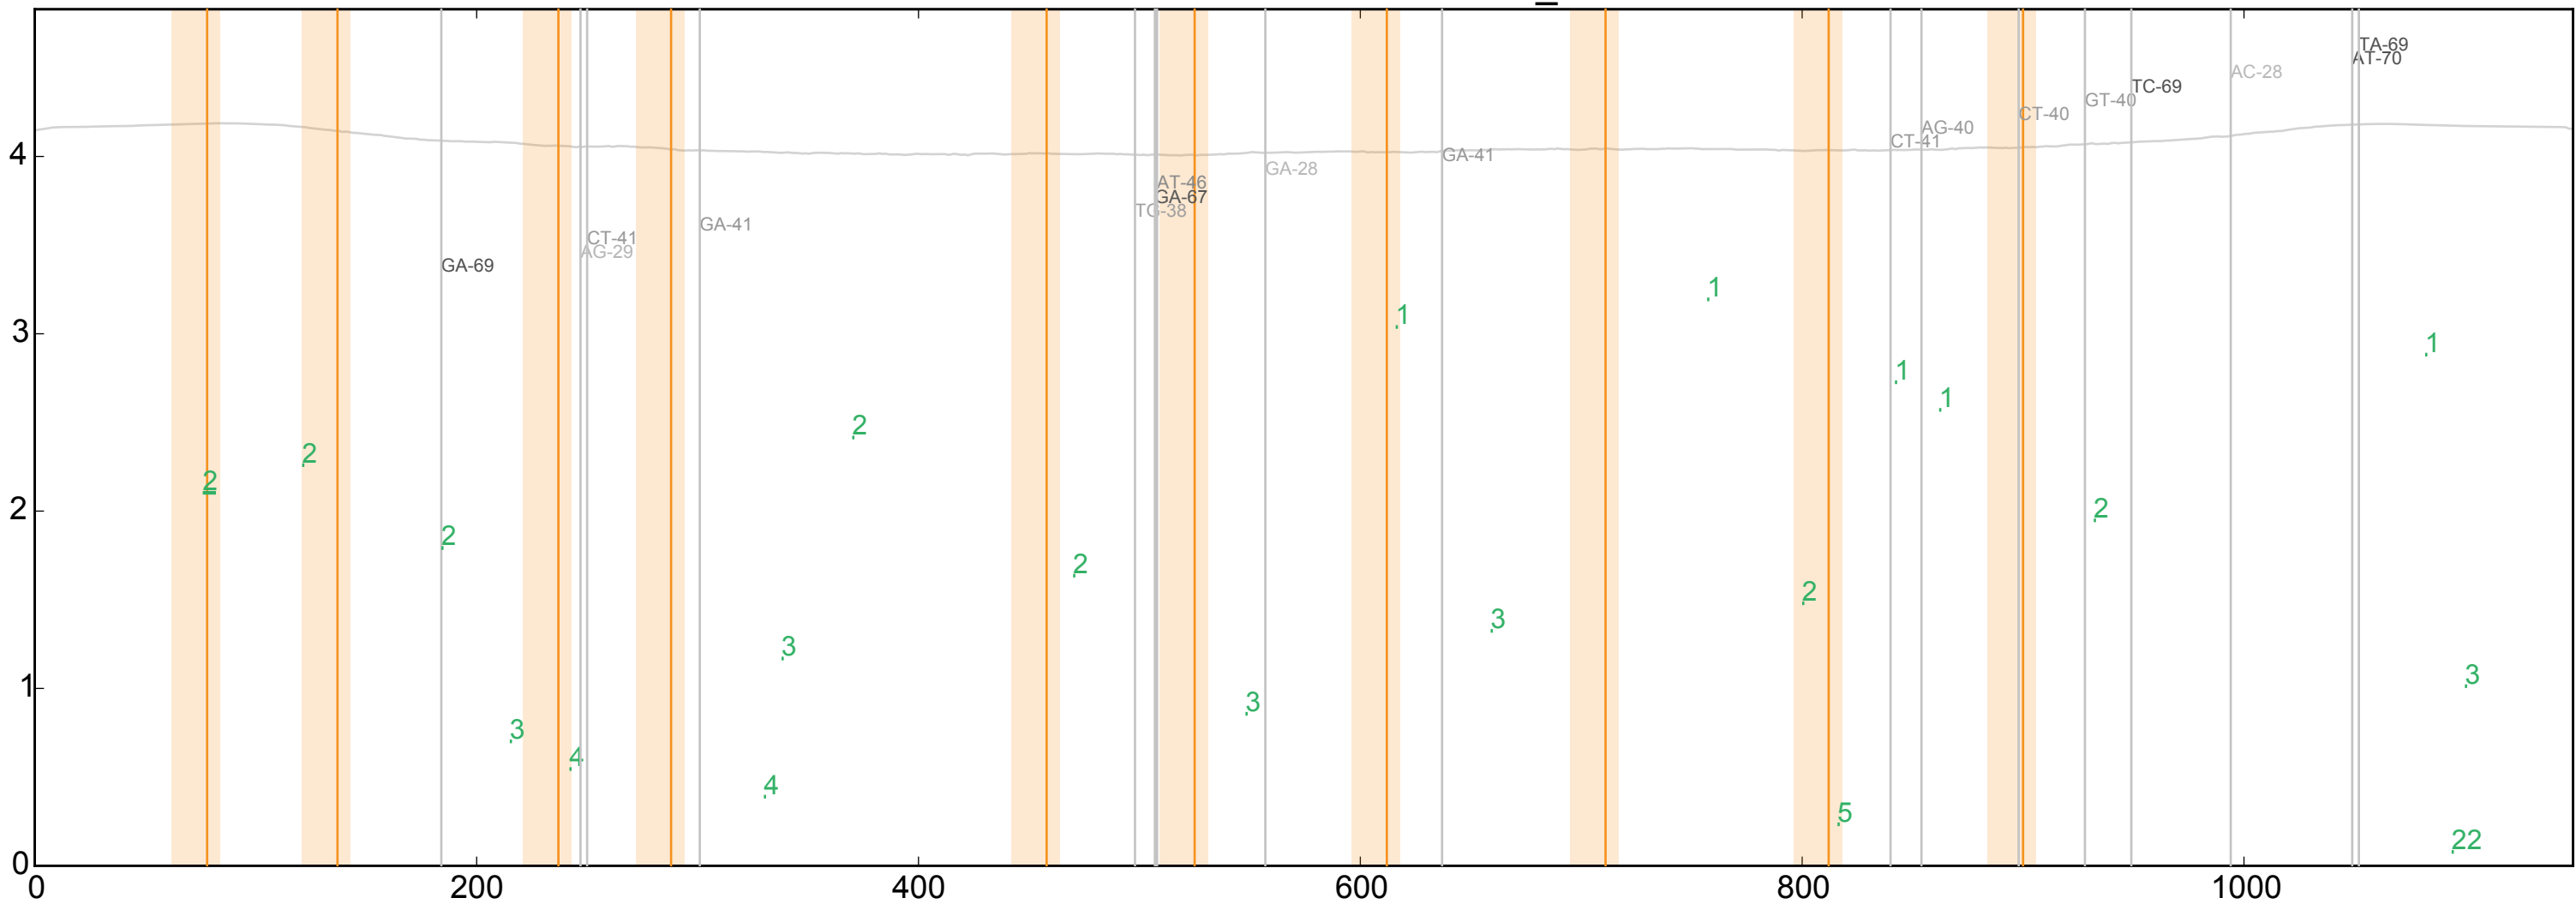



Mutant ENSDARG00000079738\_5

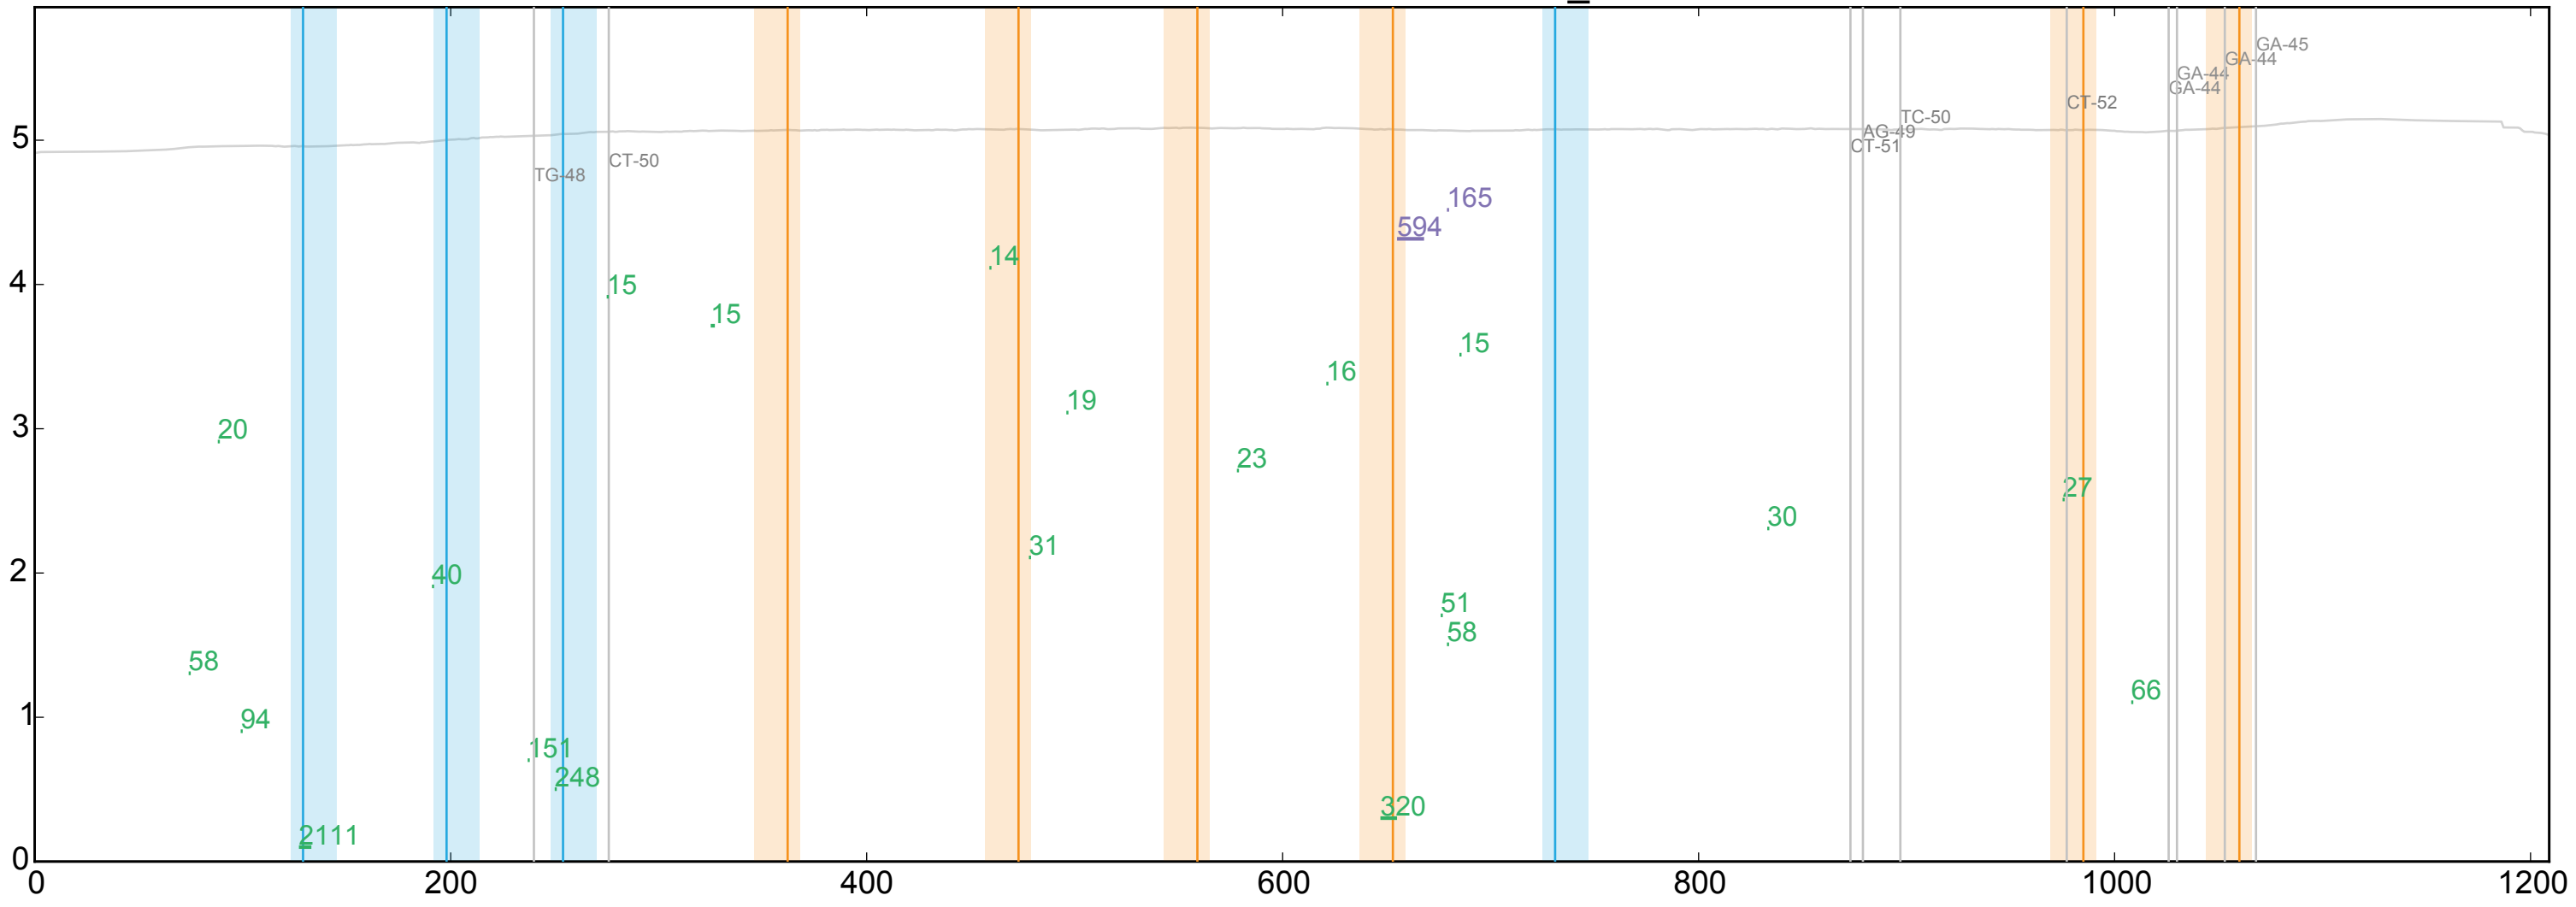

WT ENSDARG00000079738\_5

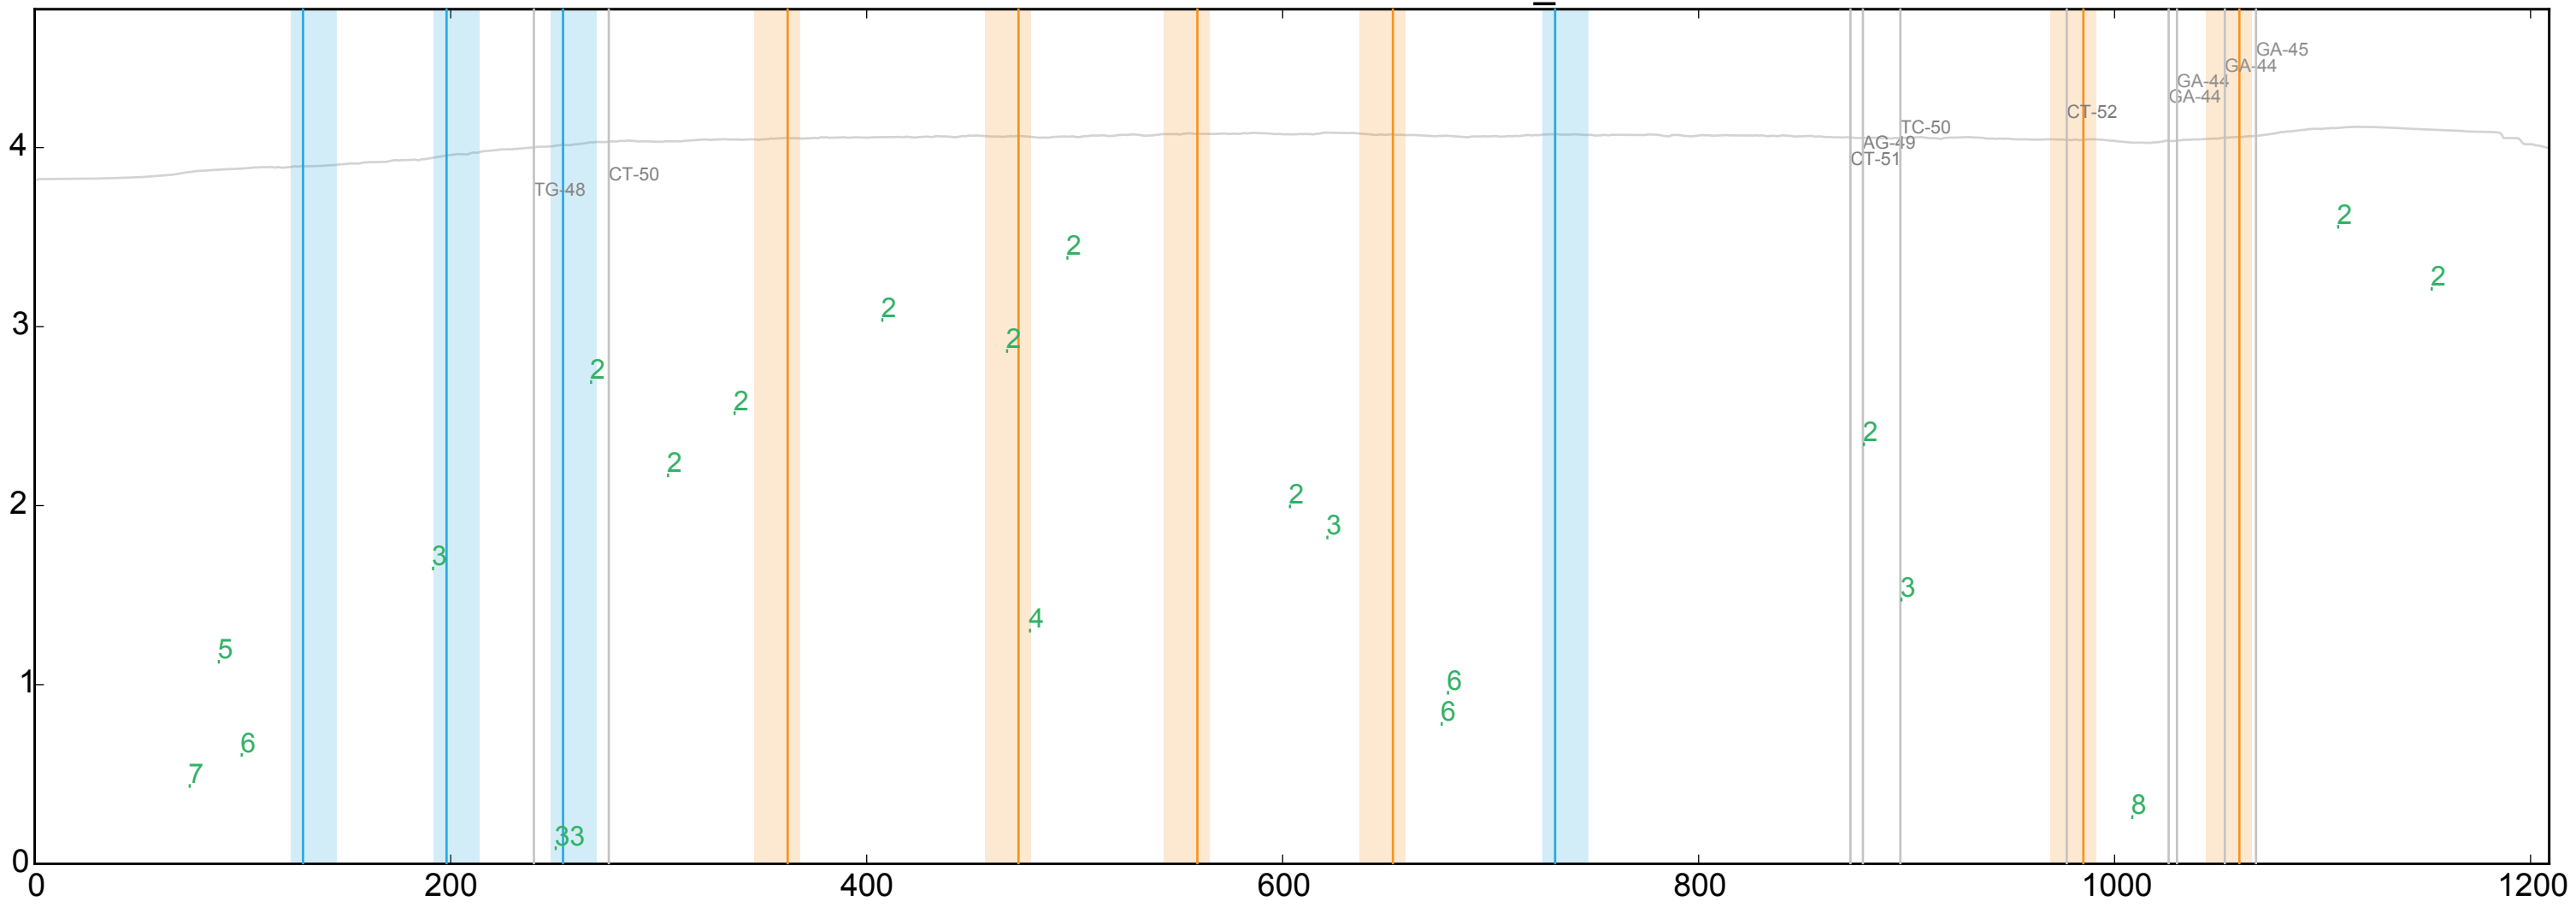

Mutant ENSDARG0000009136\_12

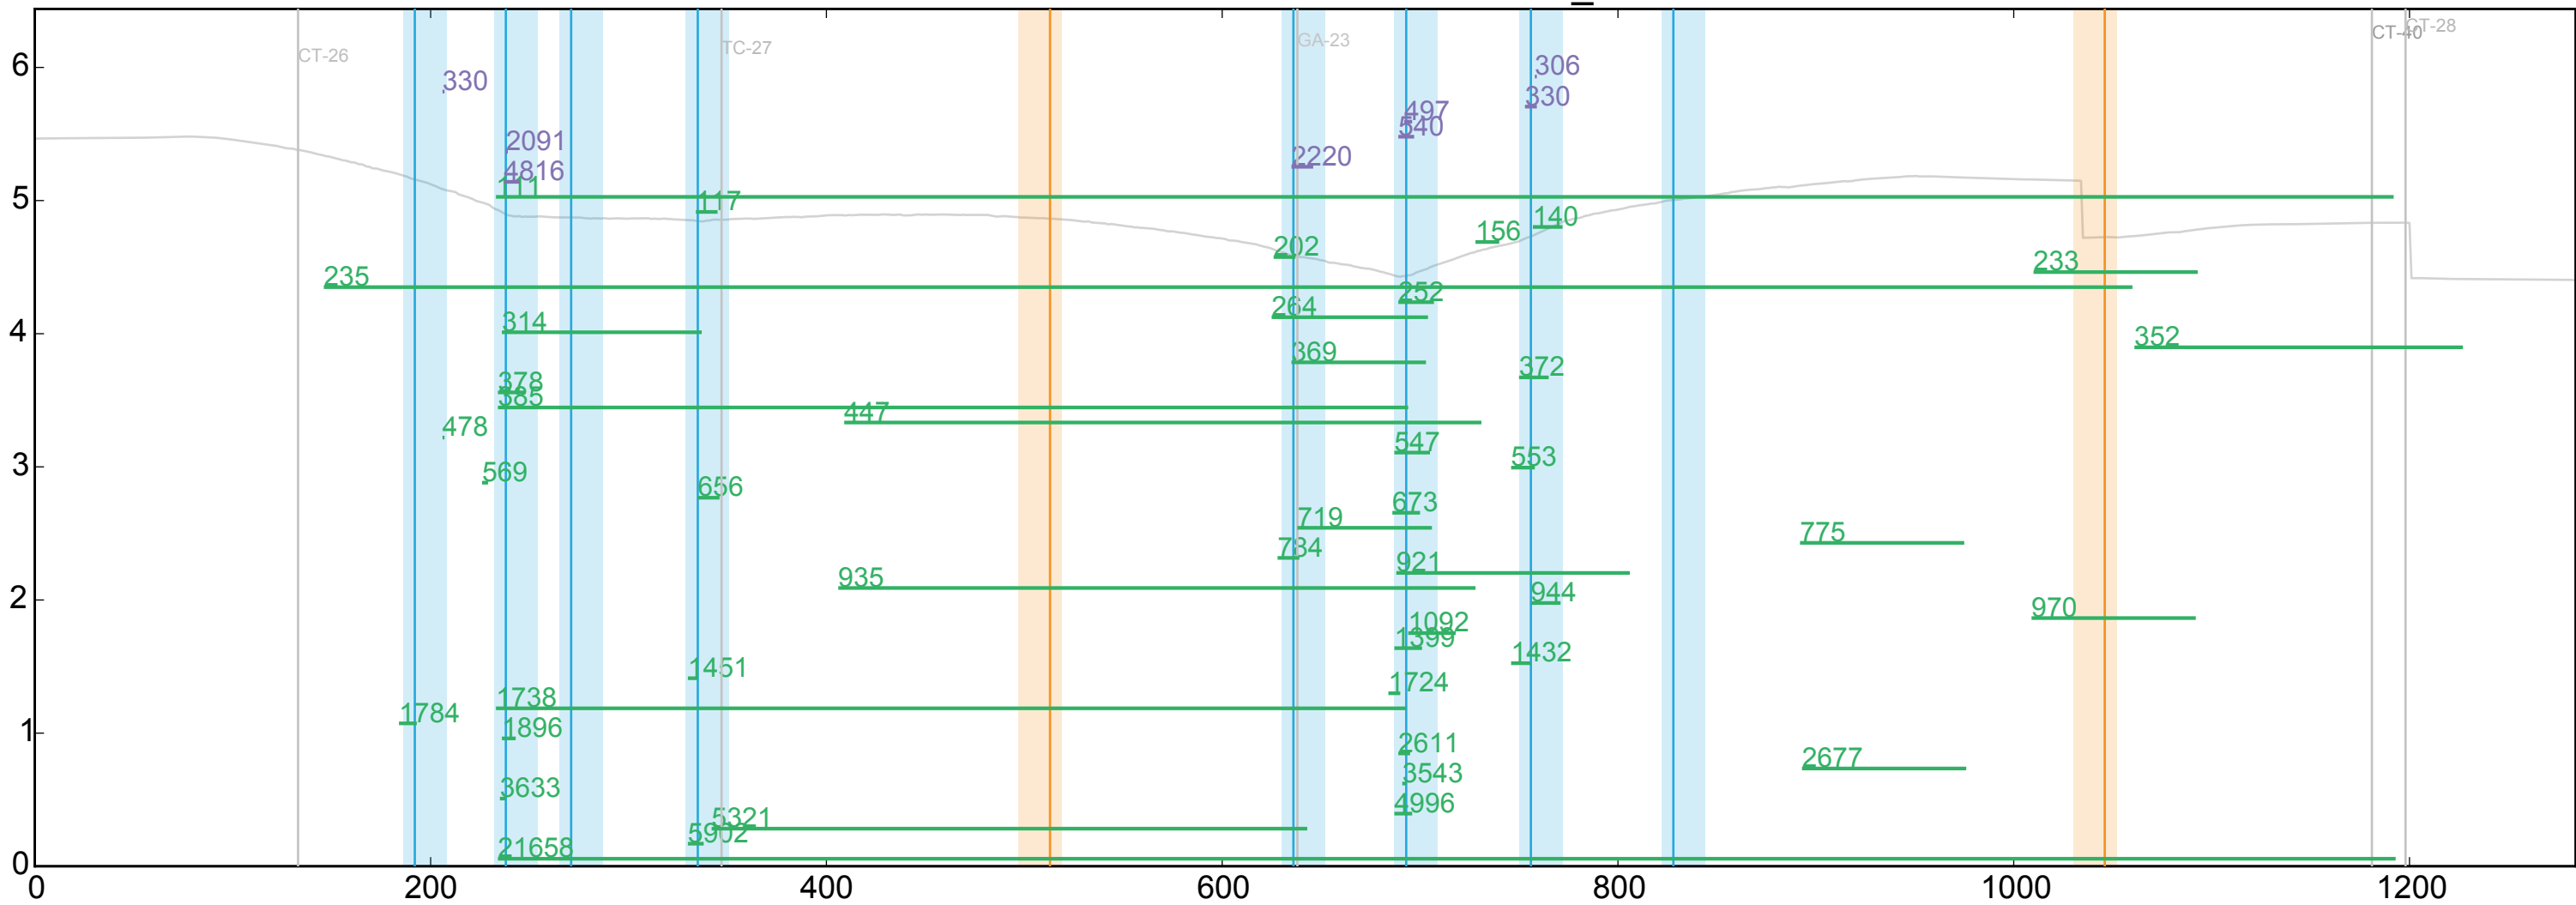

WT ENSDARG0000009136\_12

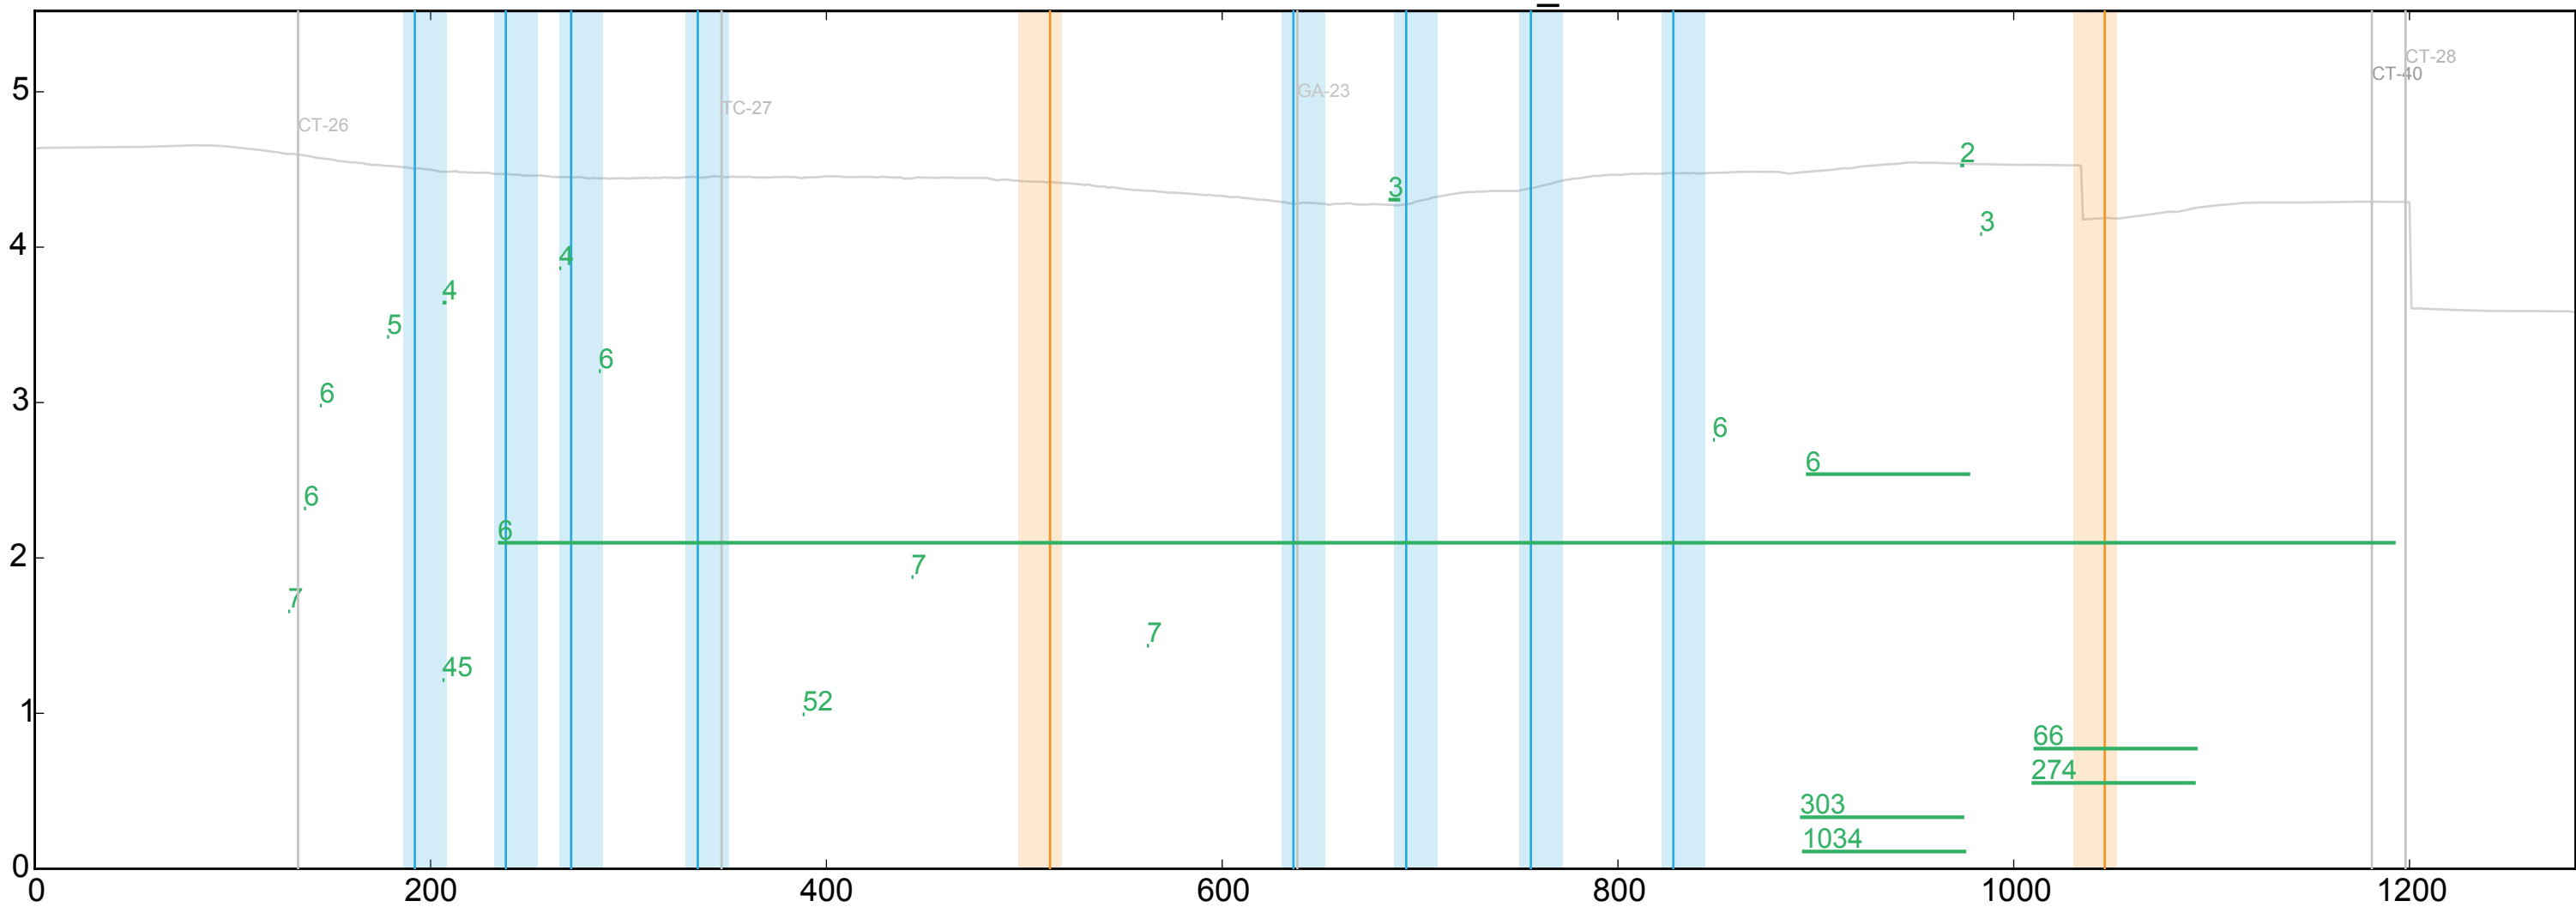

Mutant ENSDARG00000079969\_4

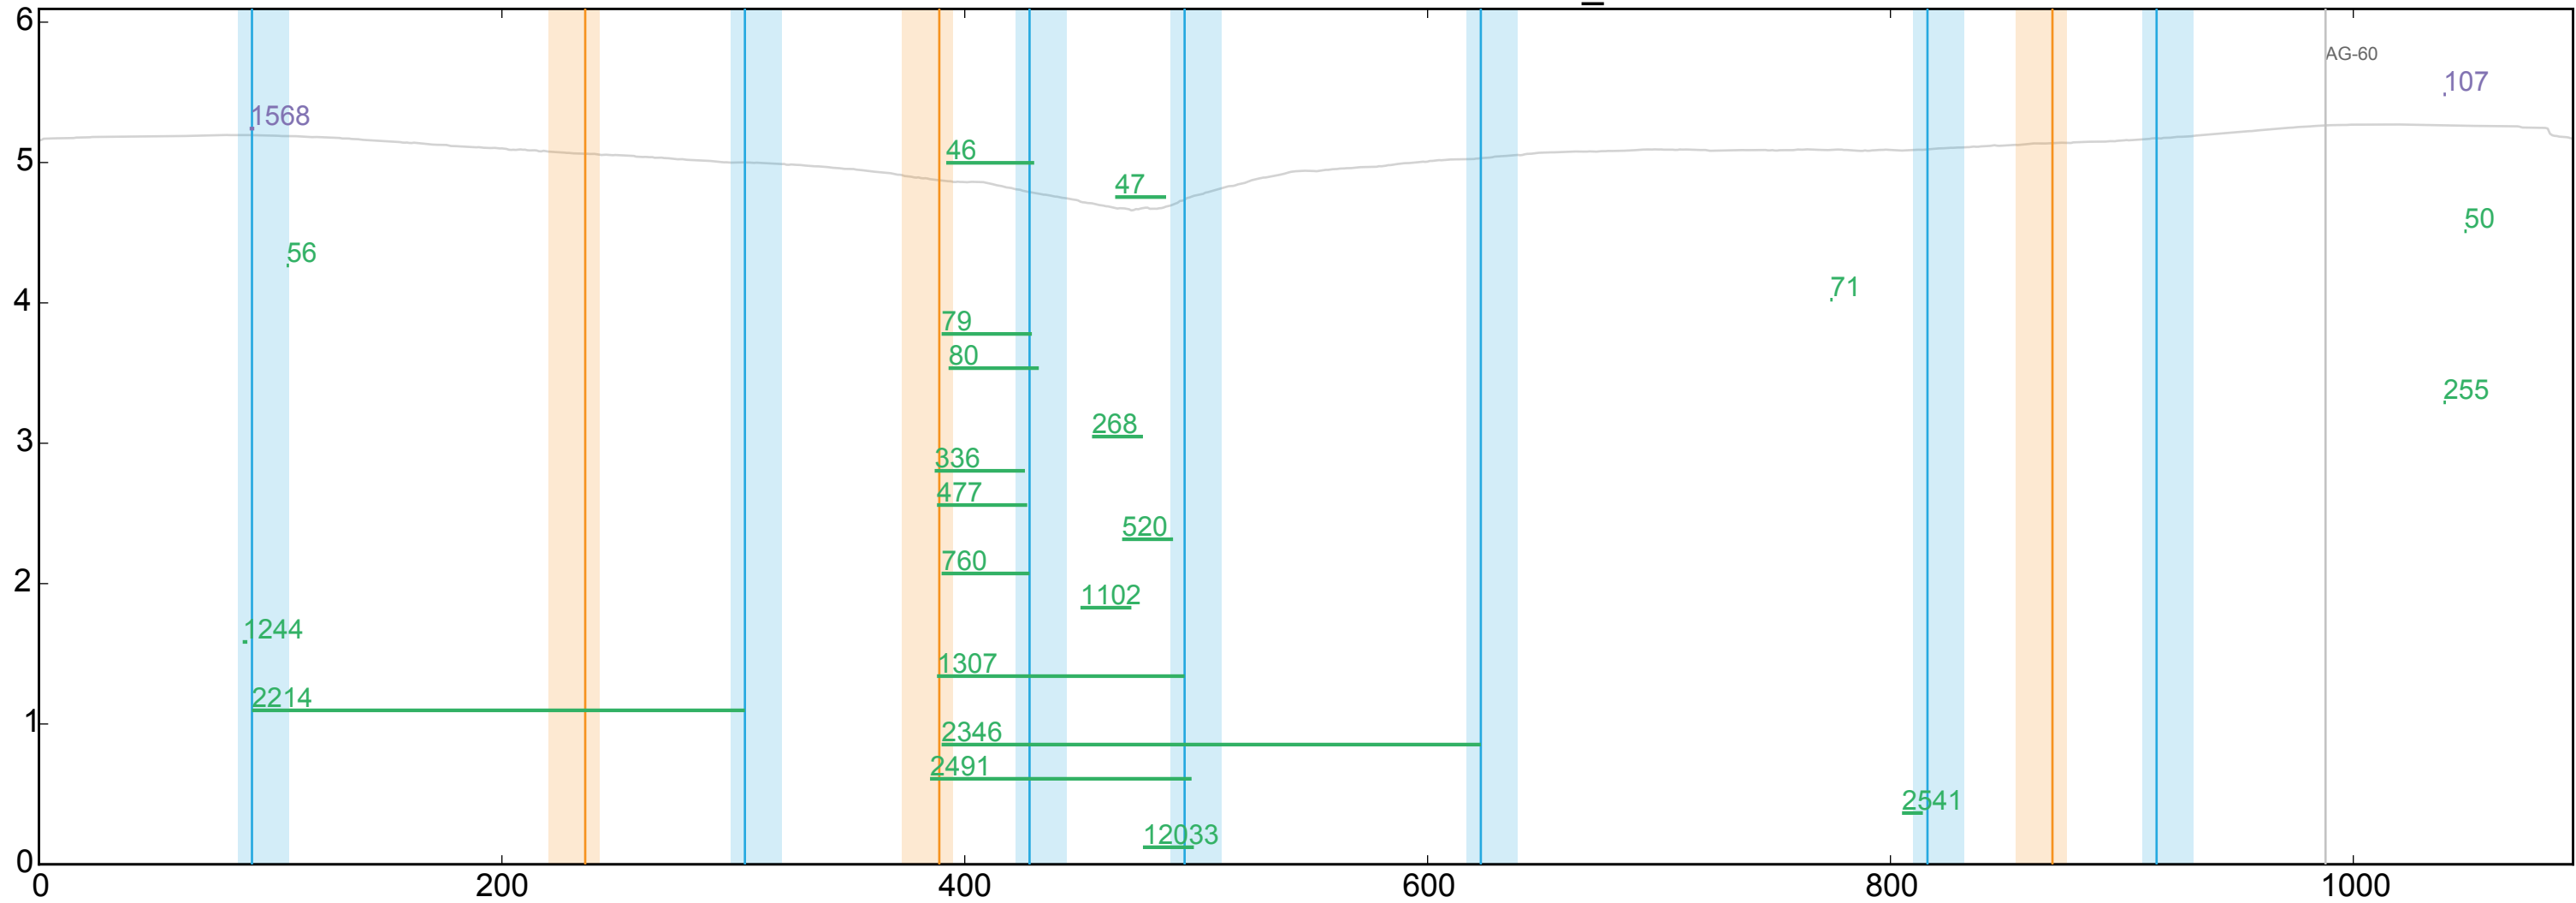

WT ENSDARG00000079969\_4

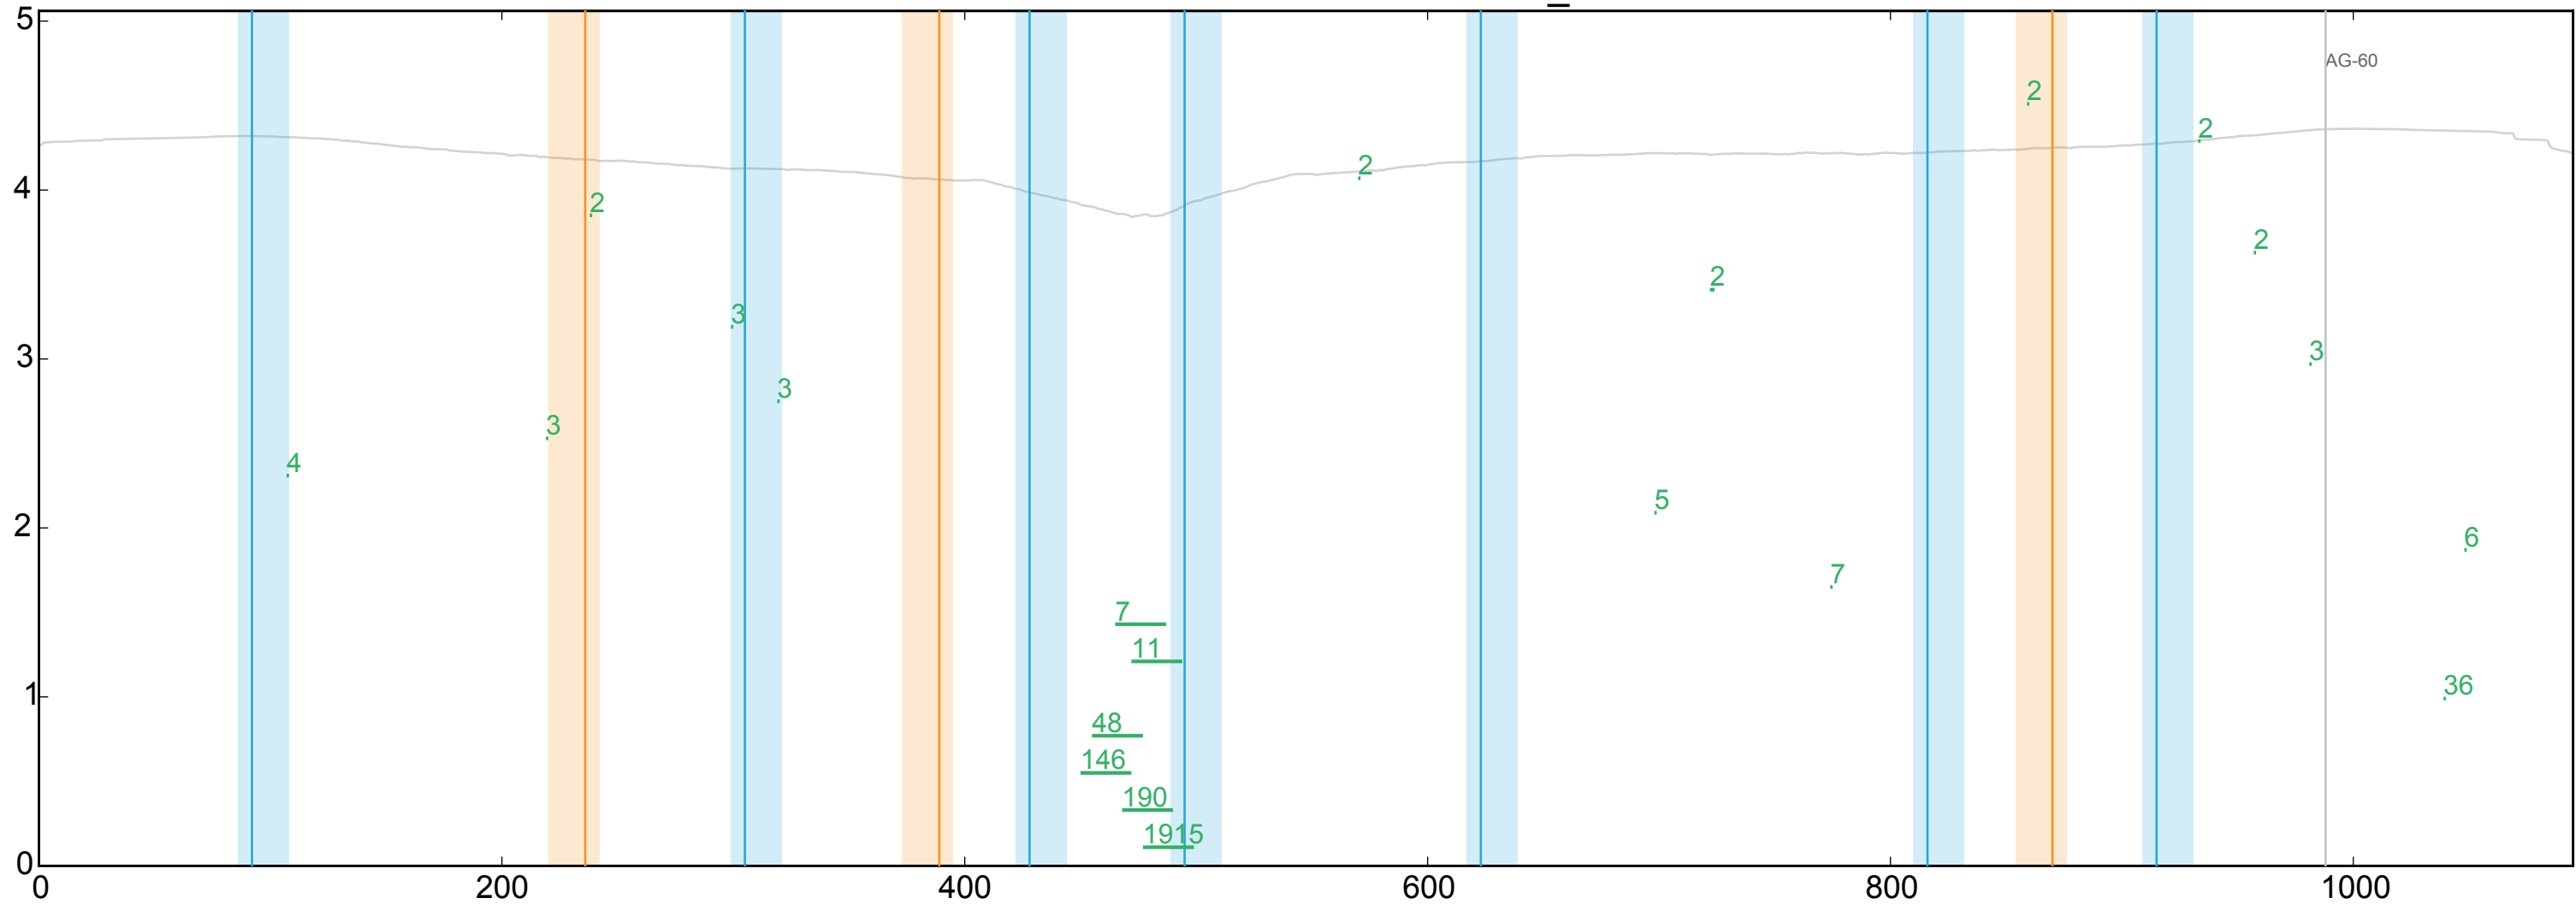





Mutant ENSDARG0000055132\_0

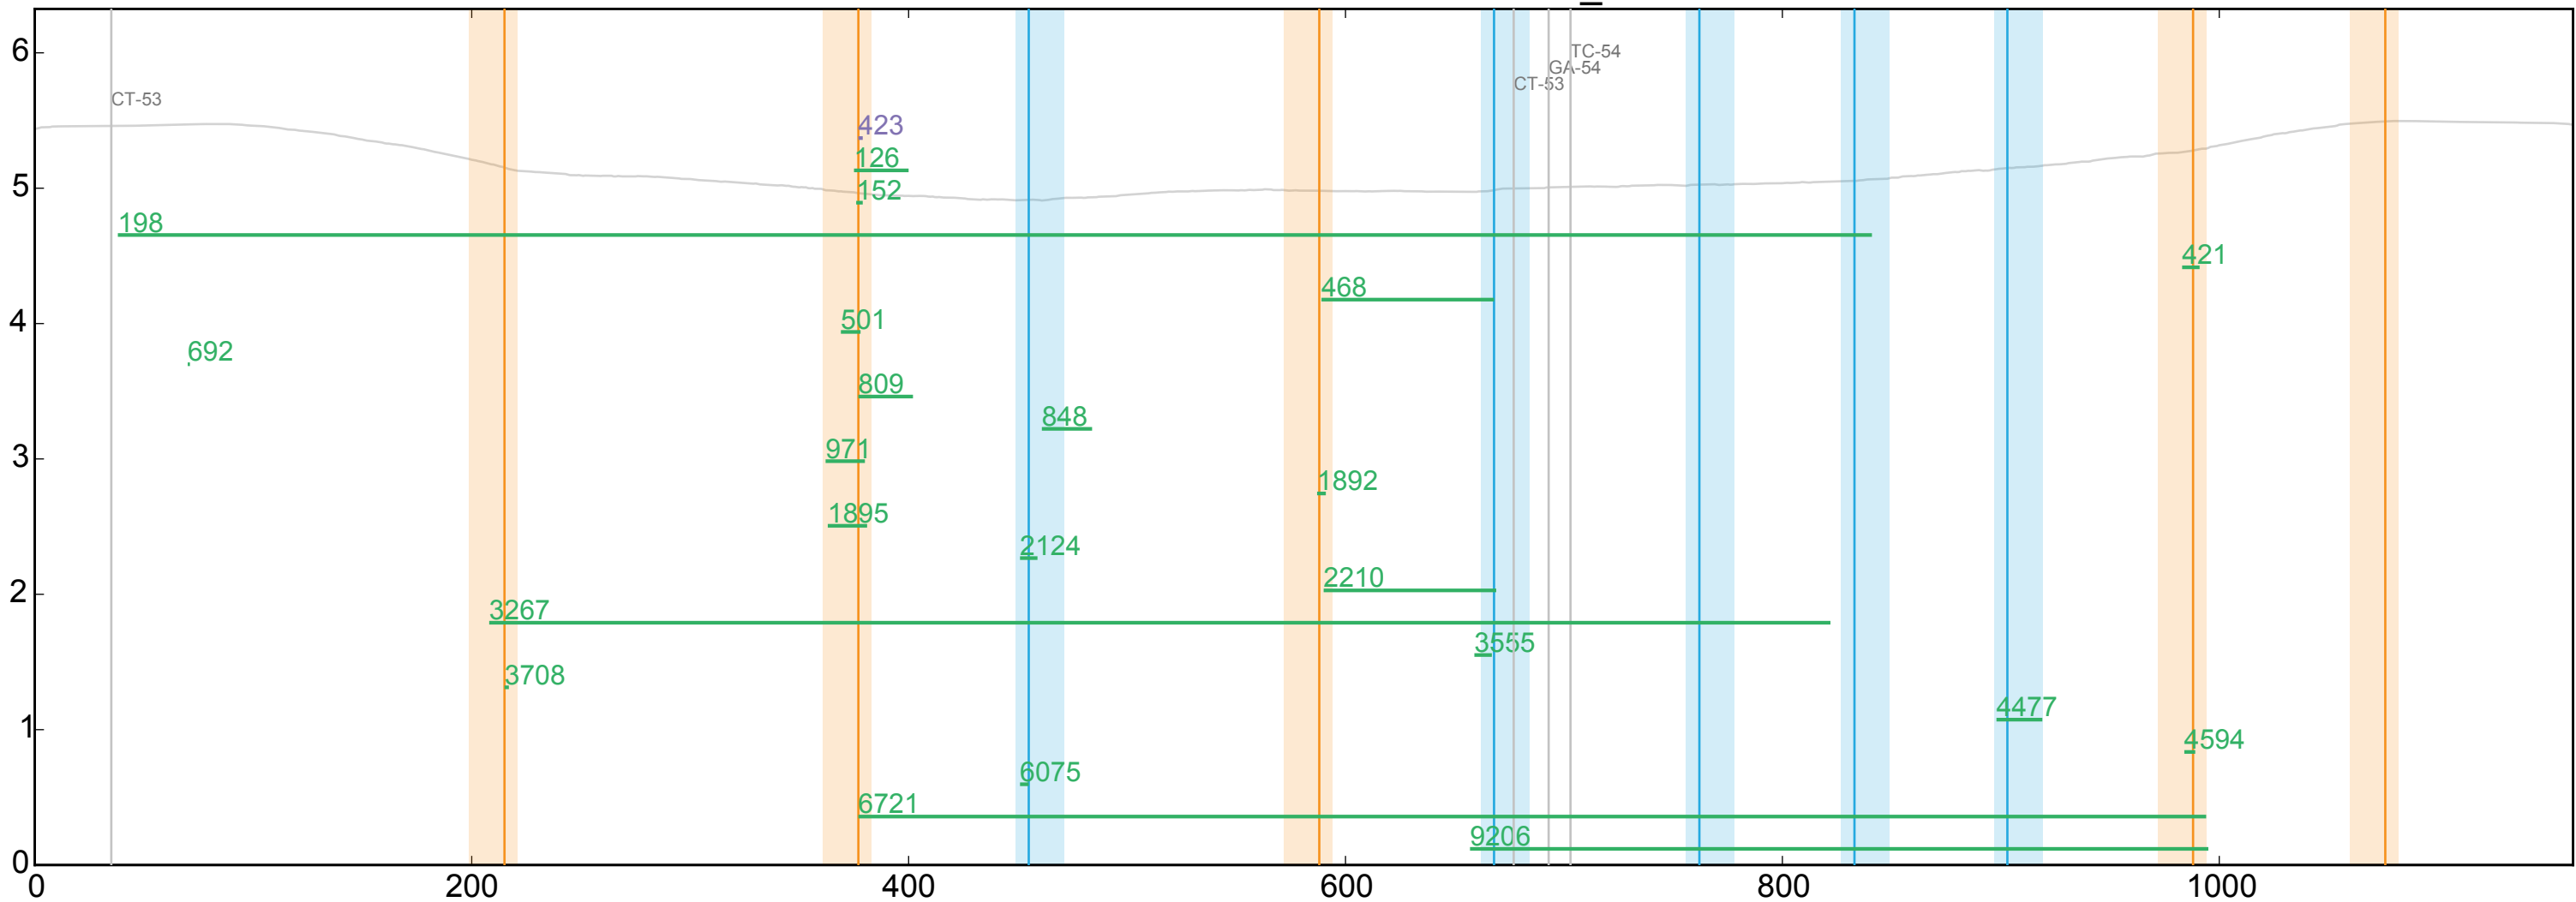

WT ENSDARG0000055132\_0

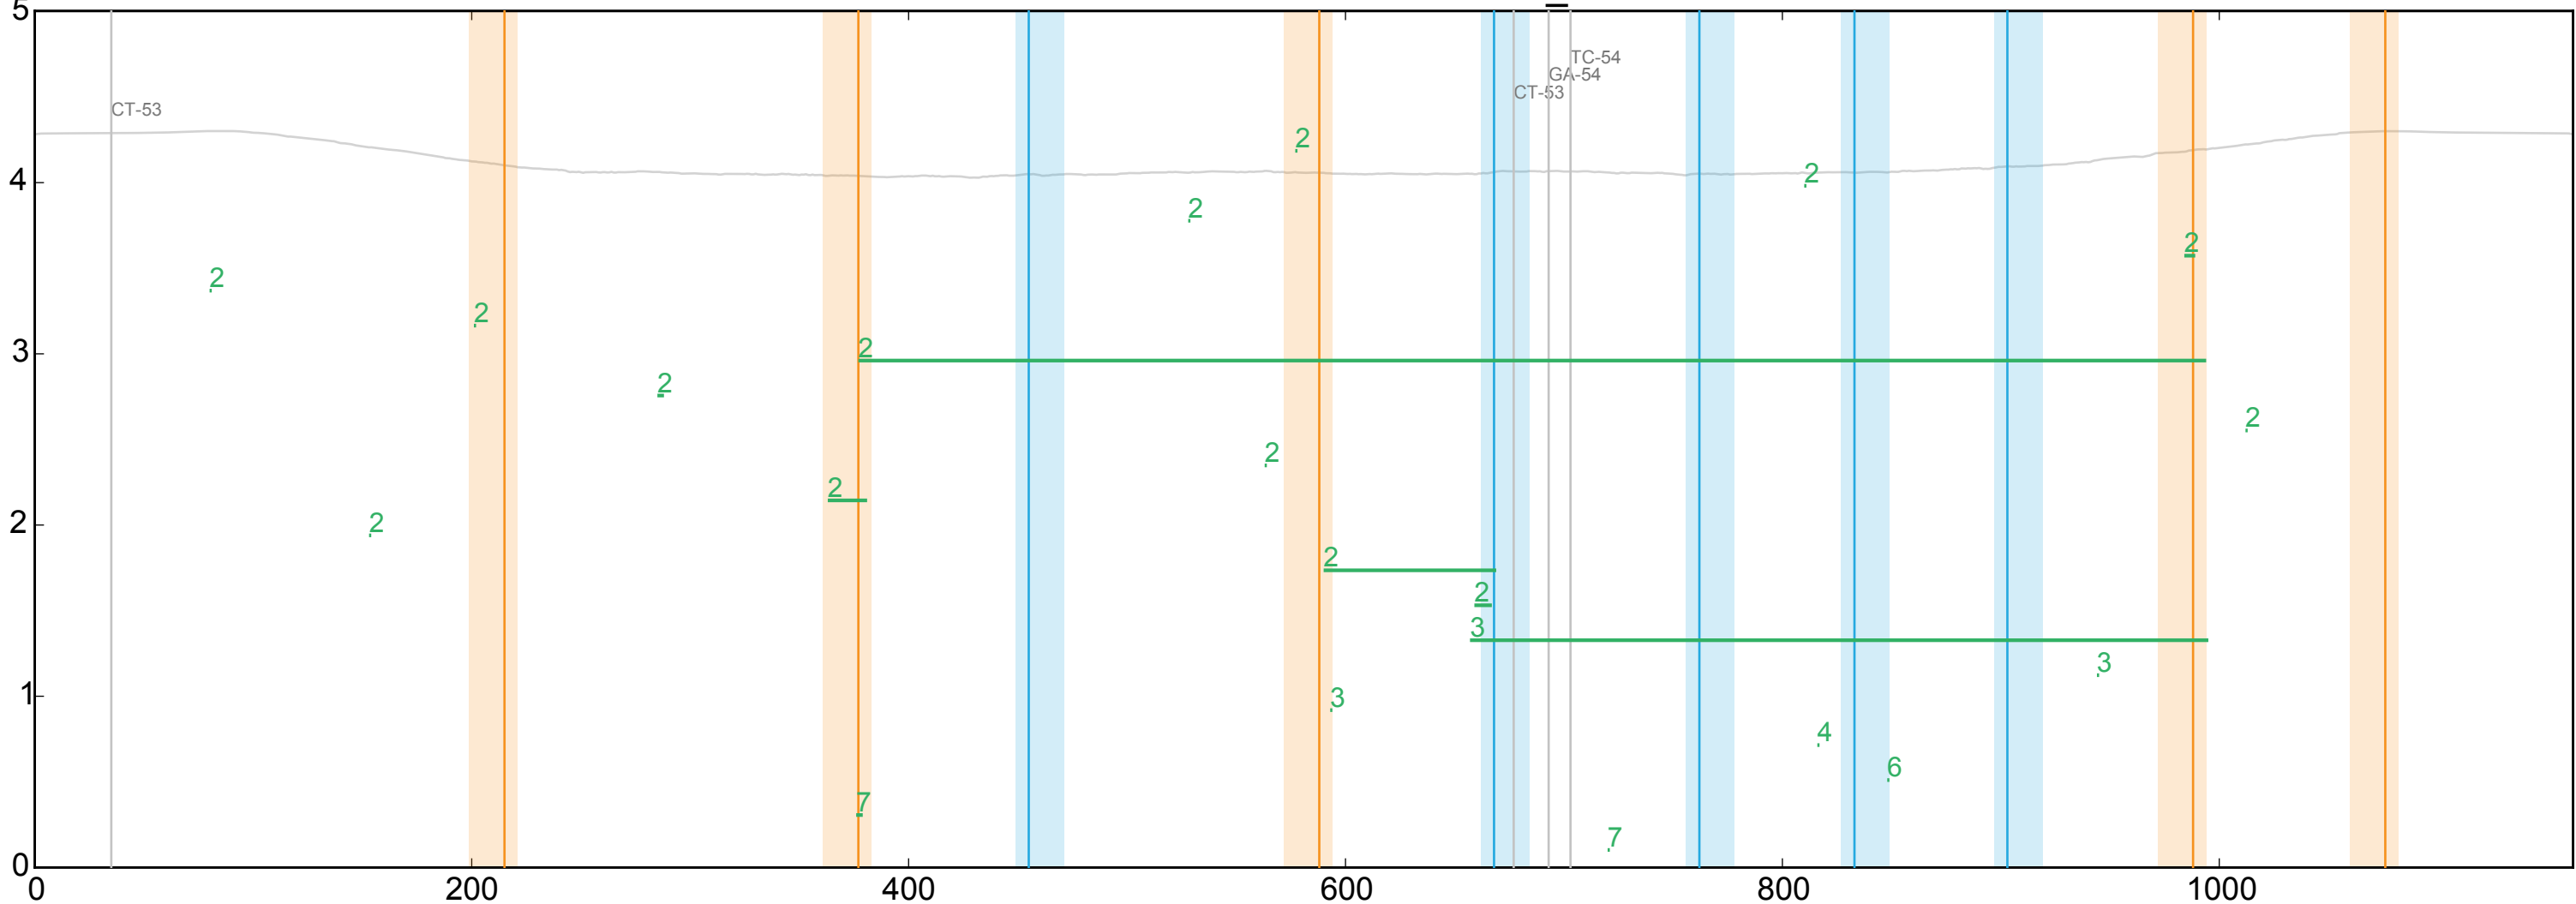

Mutant ENSDARG00000057792\_1

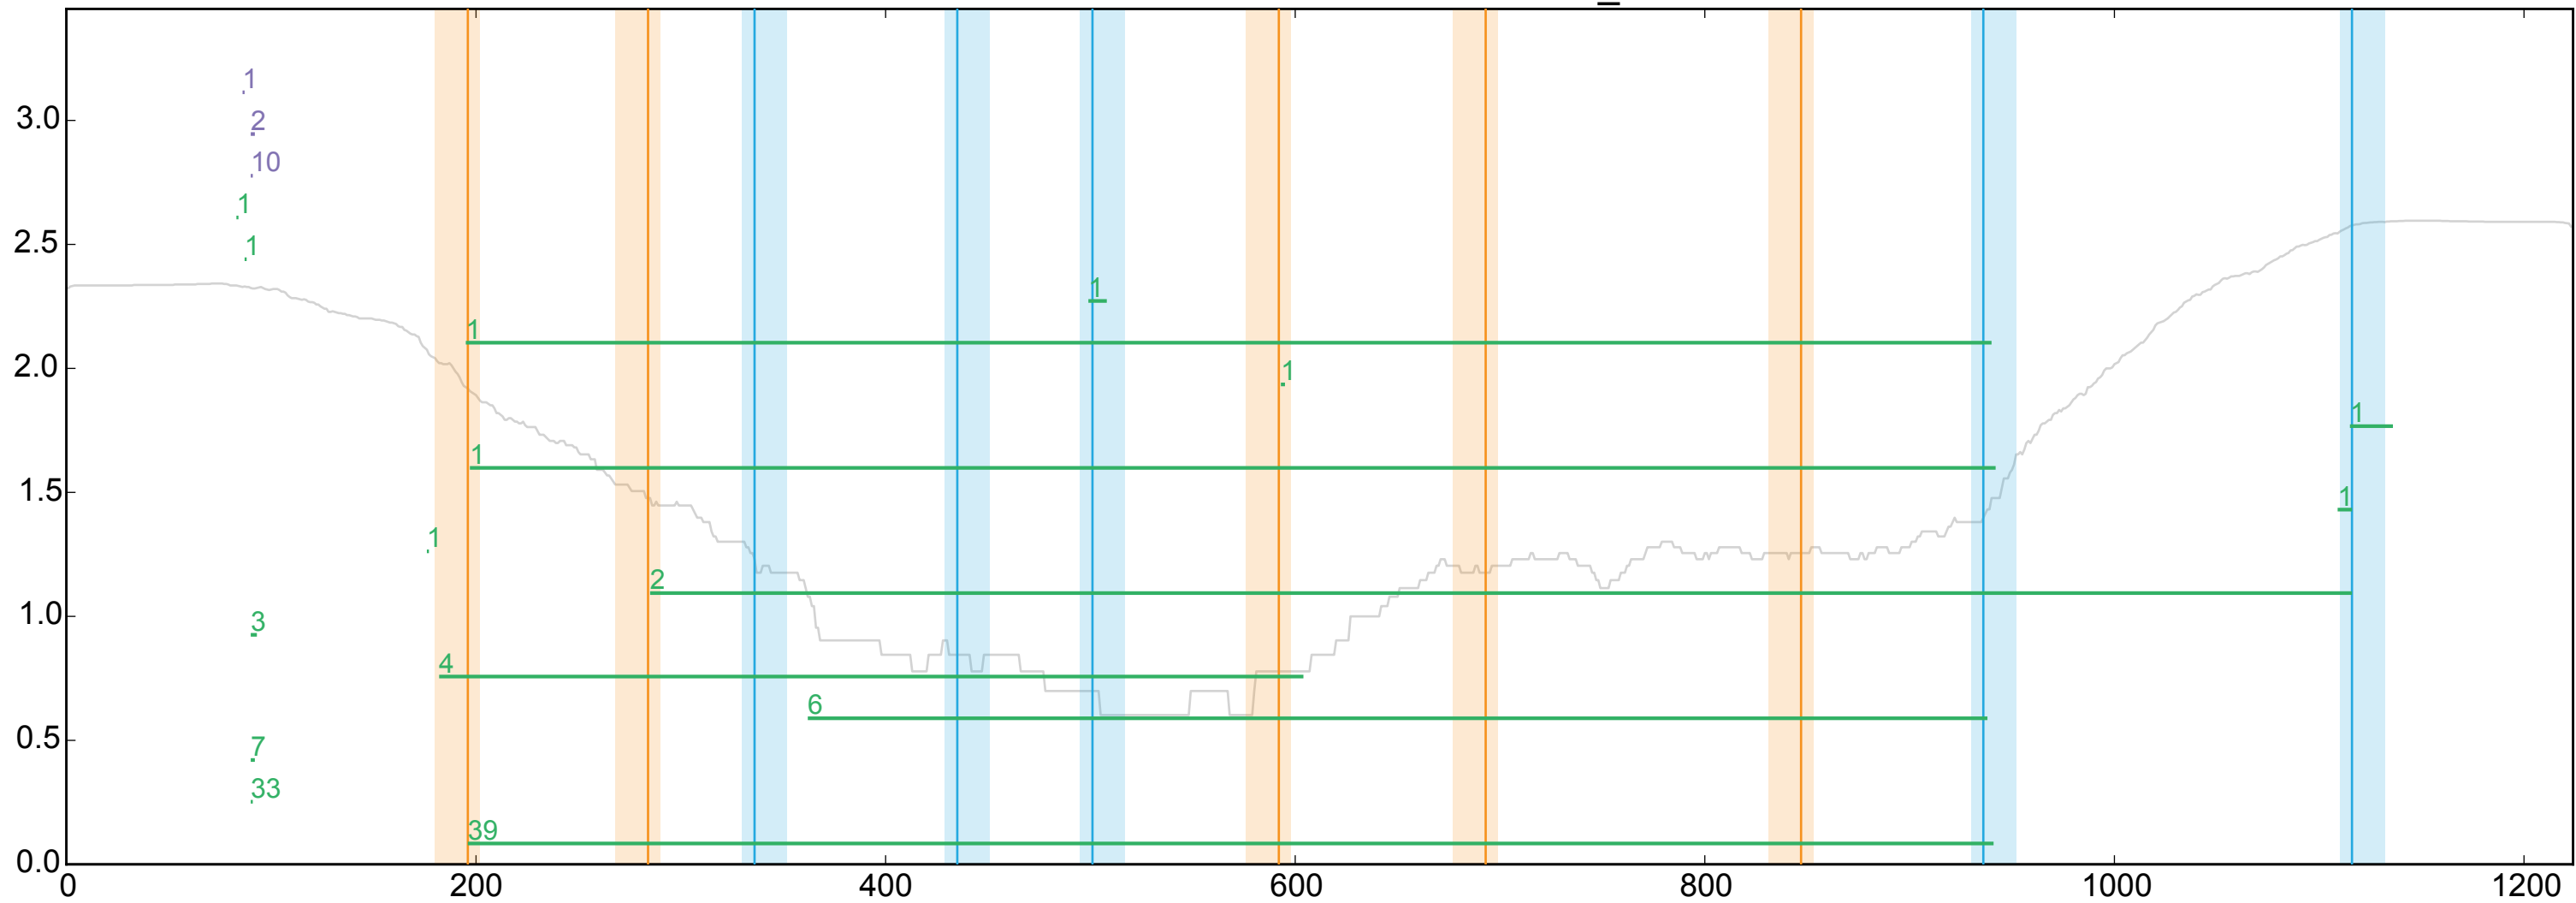

WT ENSDARG00000057792\_1

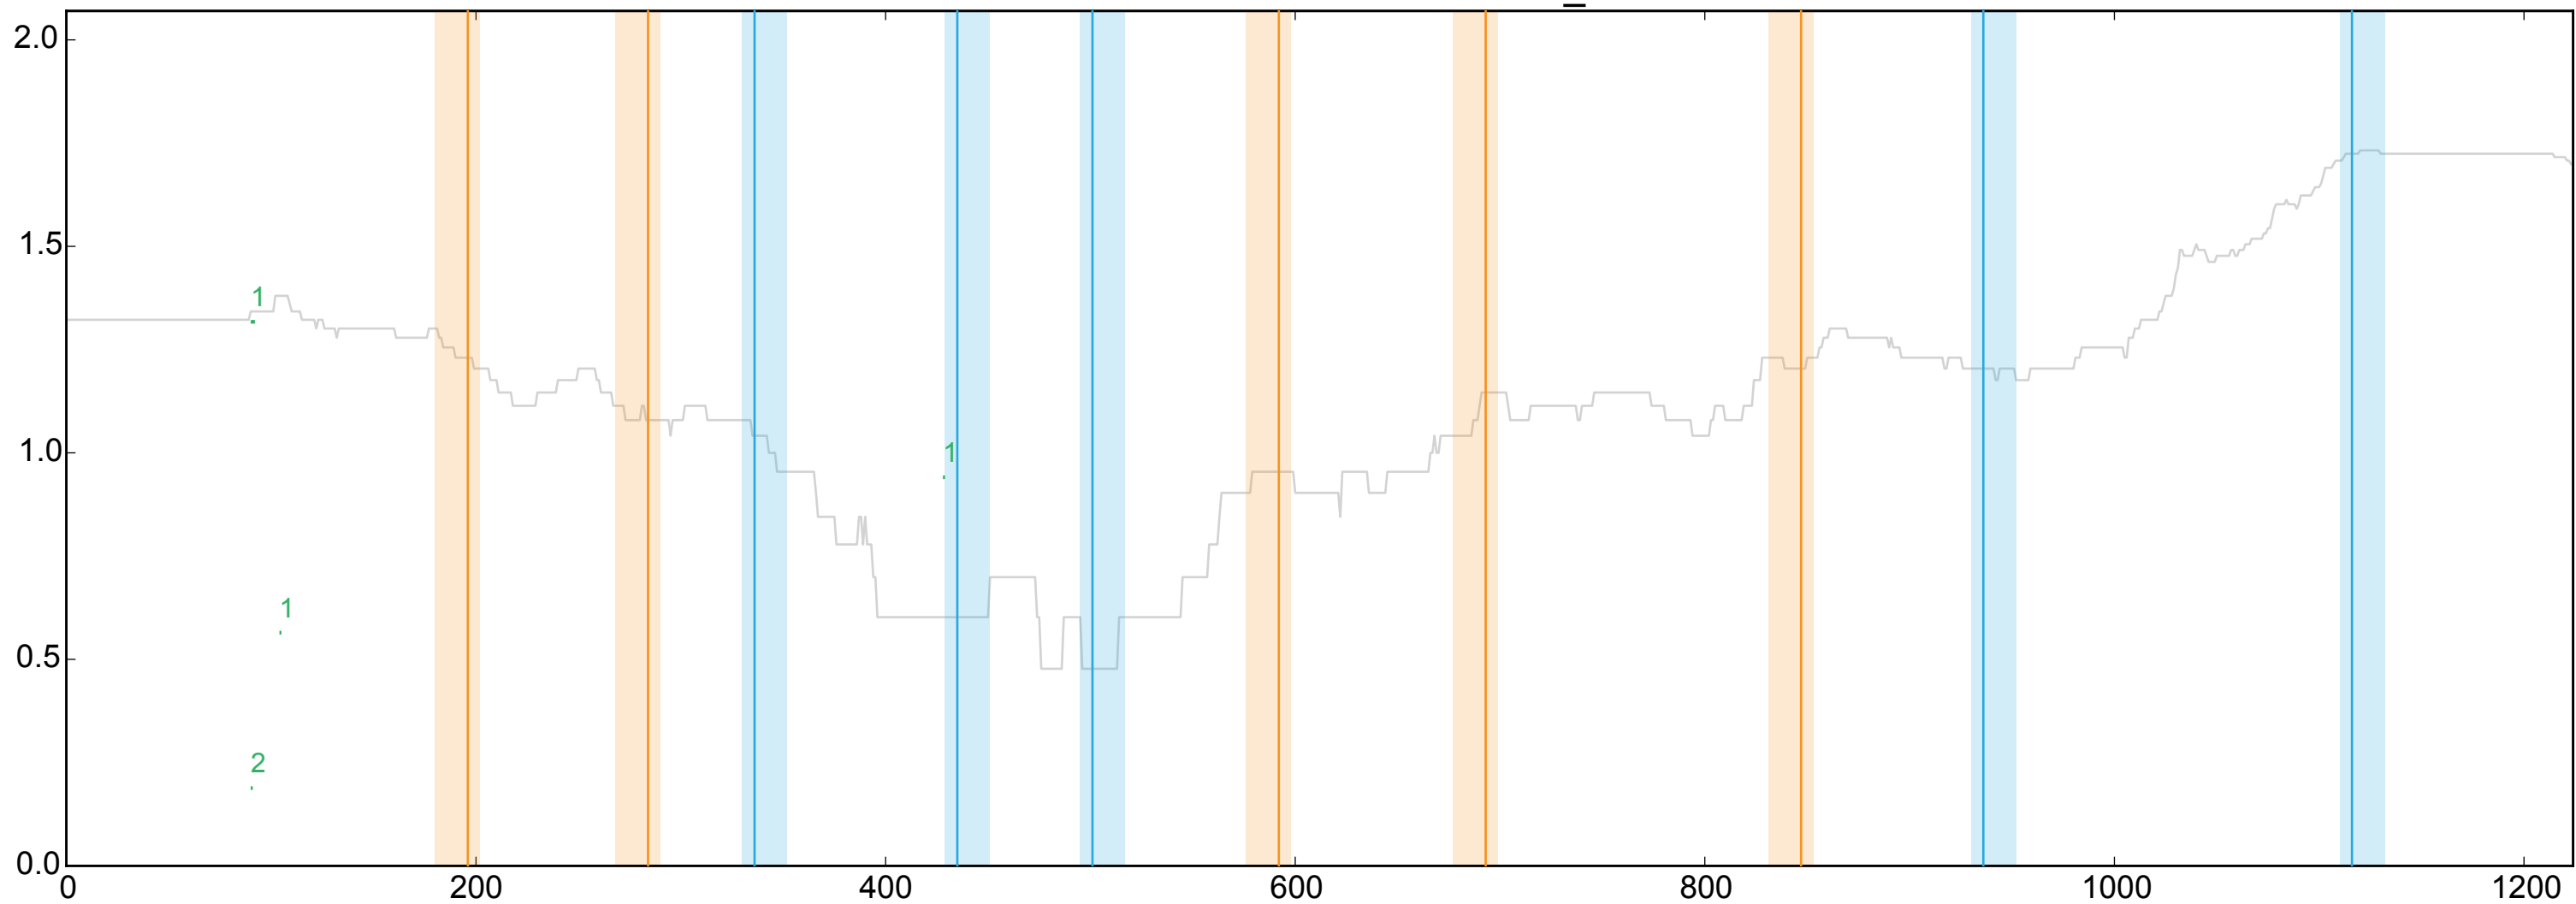

Mutant ENSDARG00000016532\_6

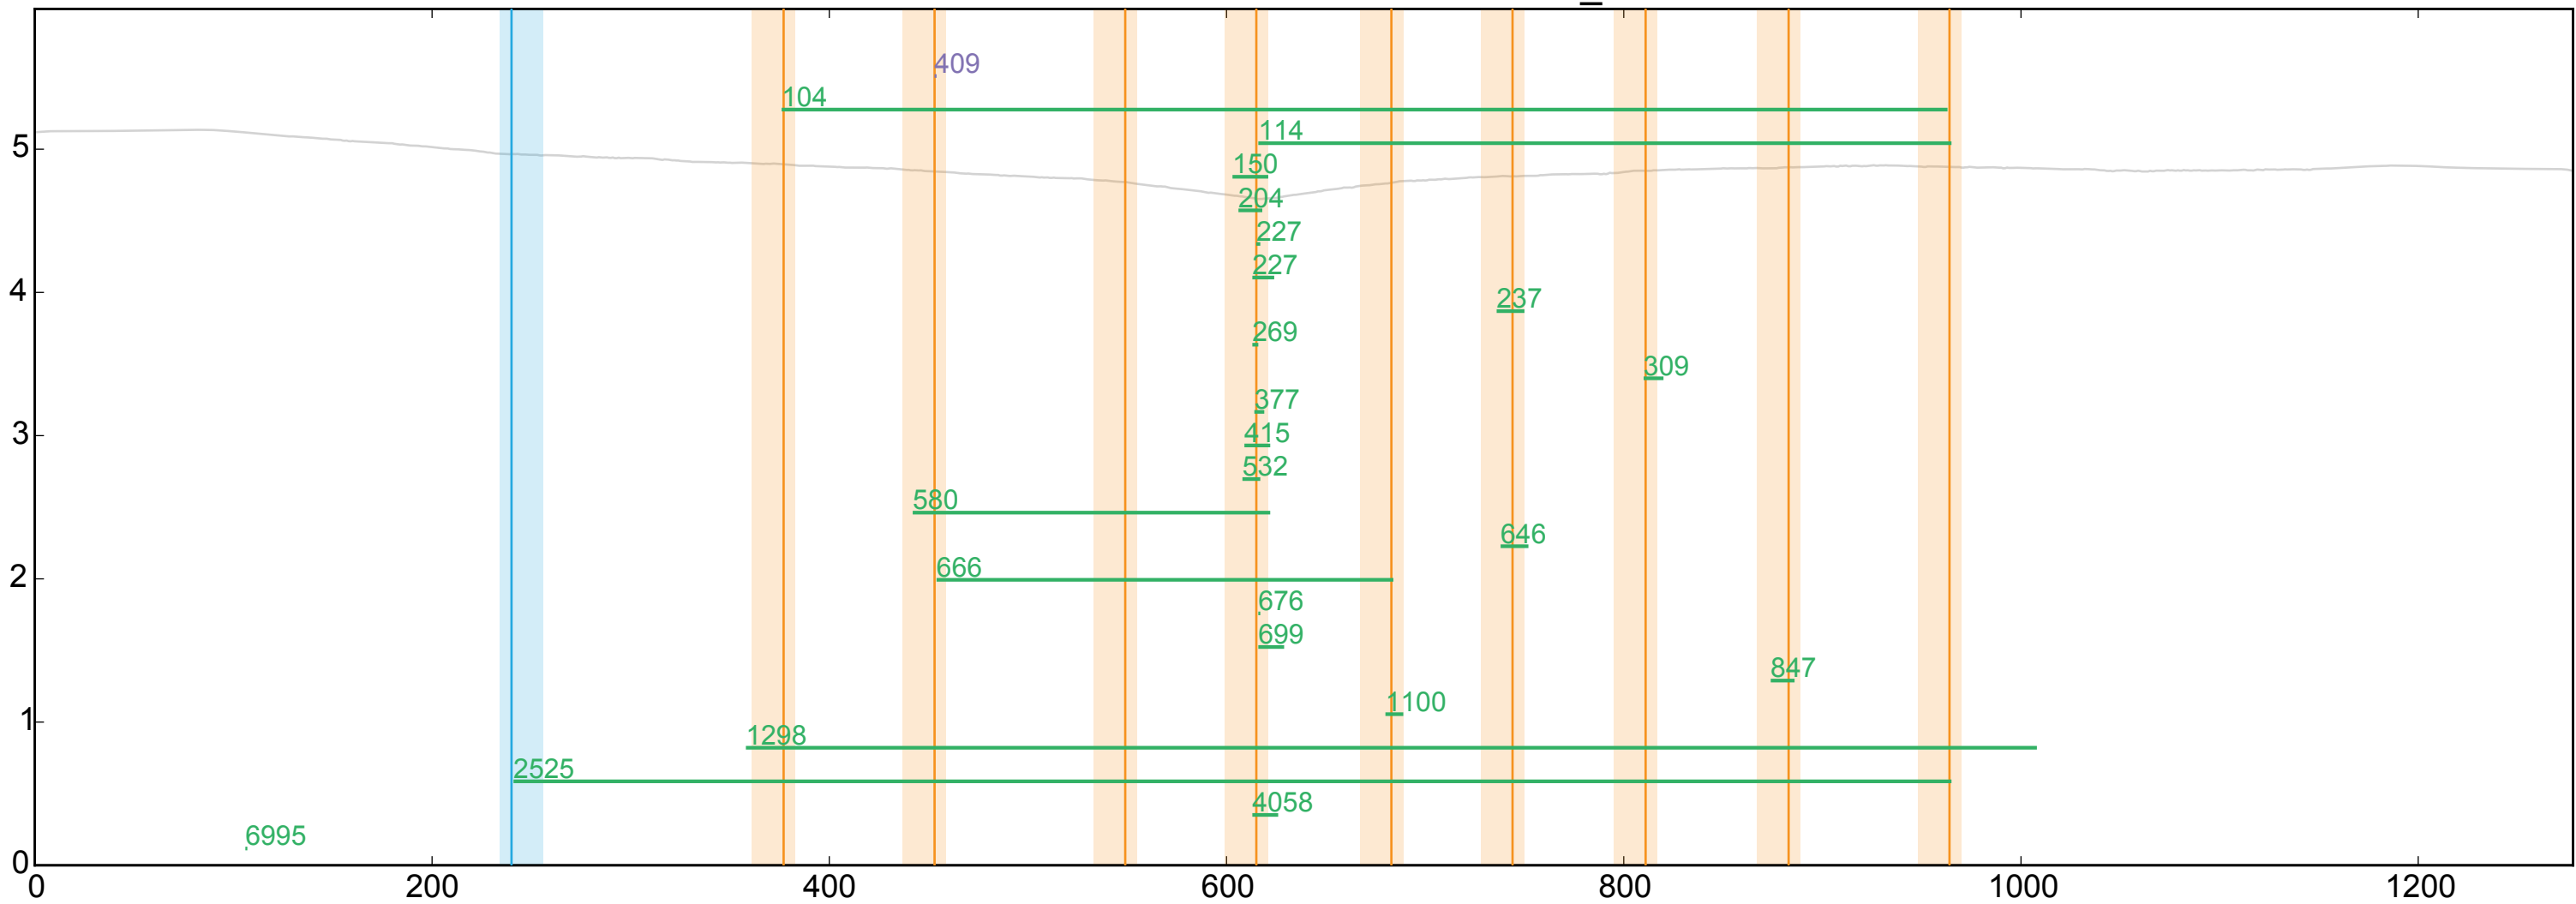

WT ENSDARG00000016532\_6

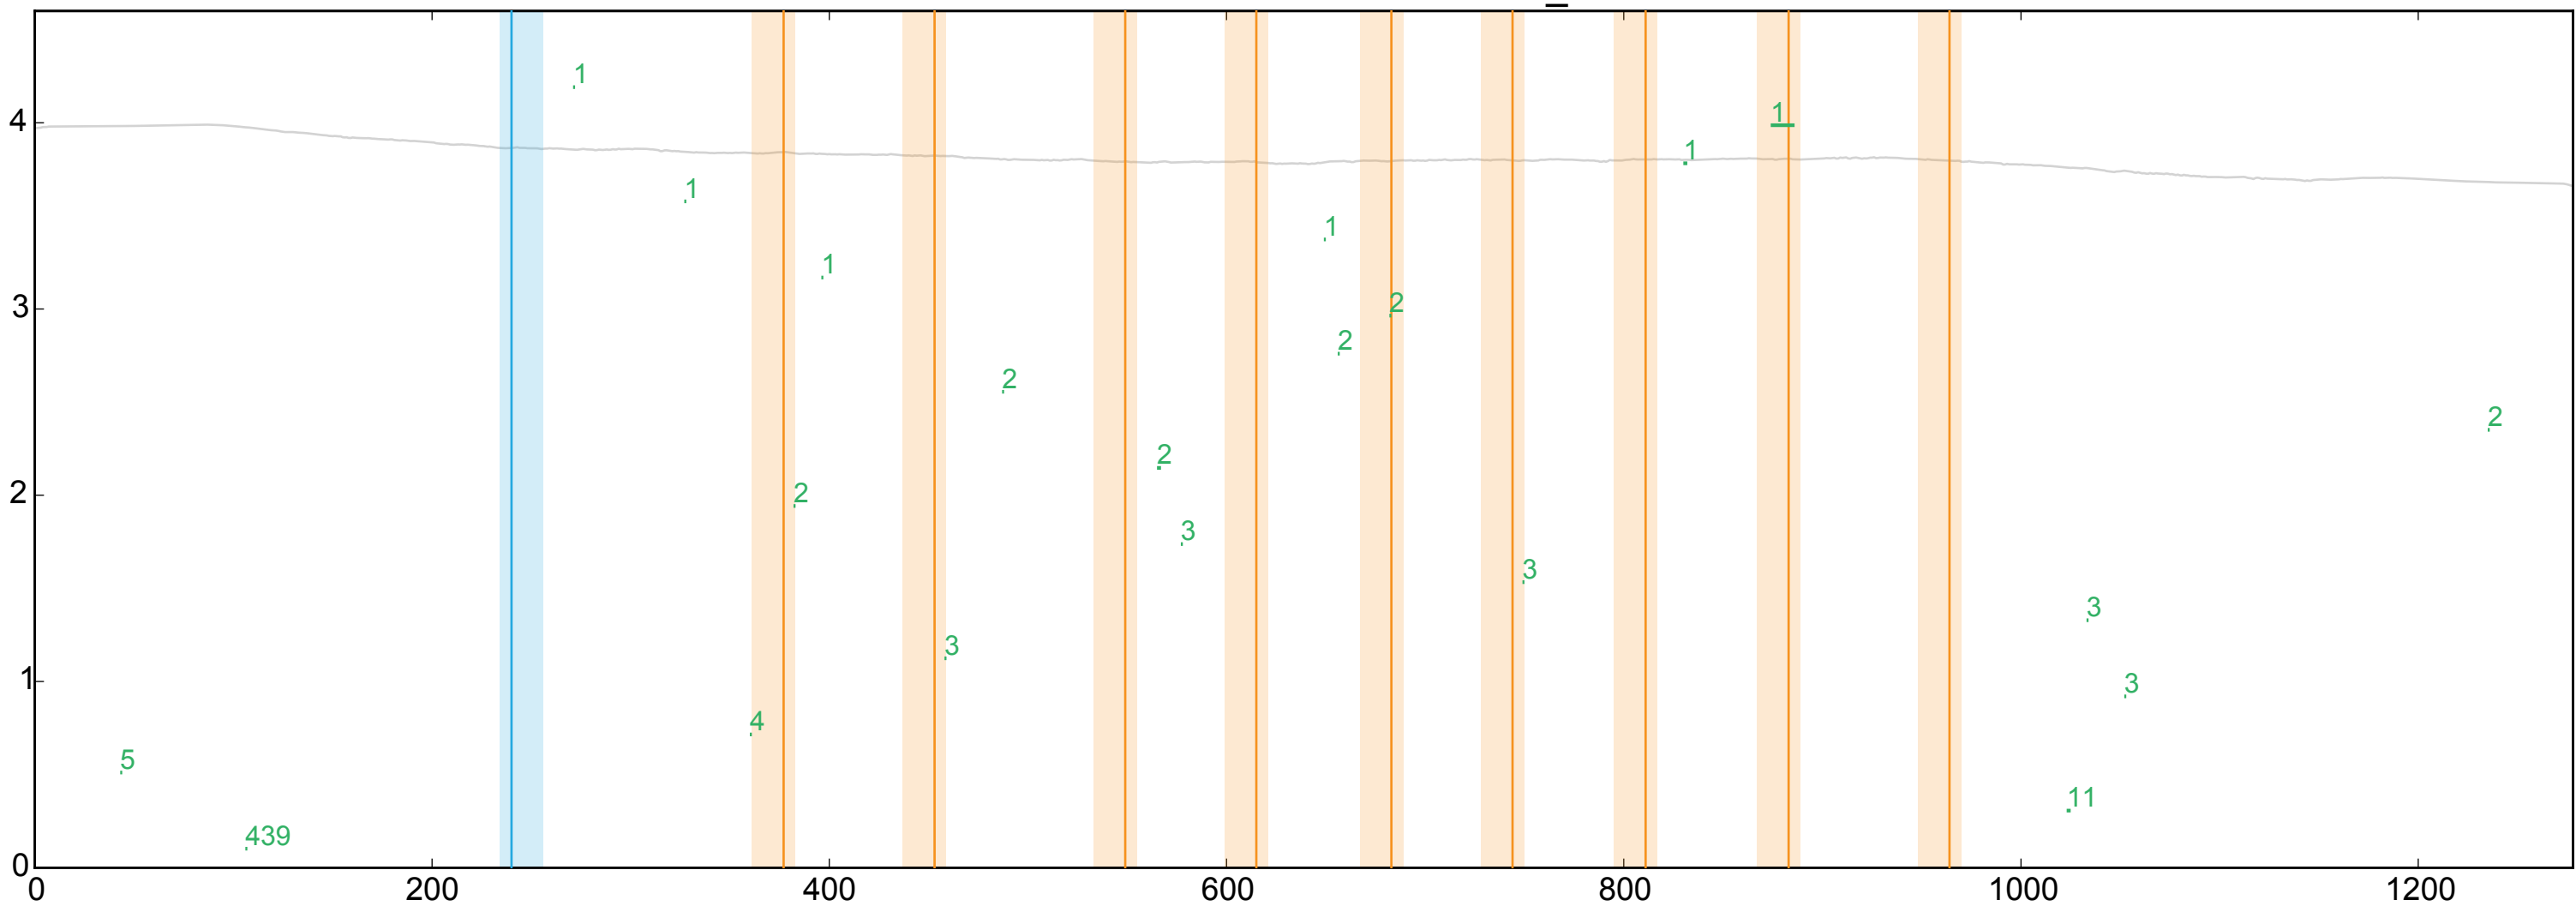



Mutant ENSDARG00000079302\_0

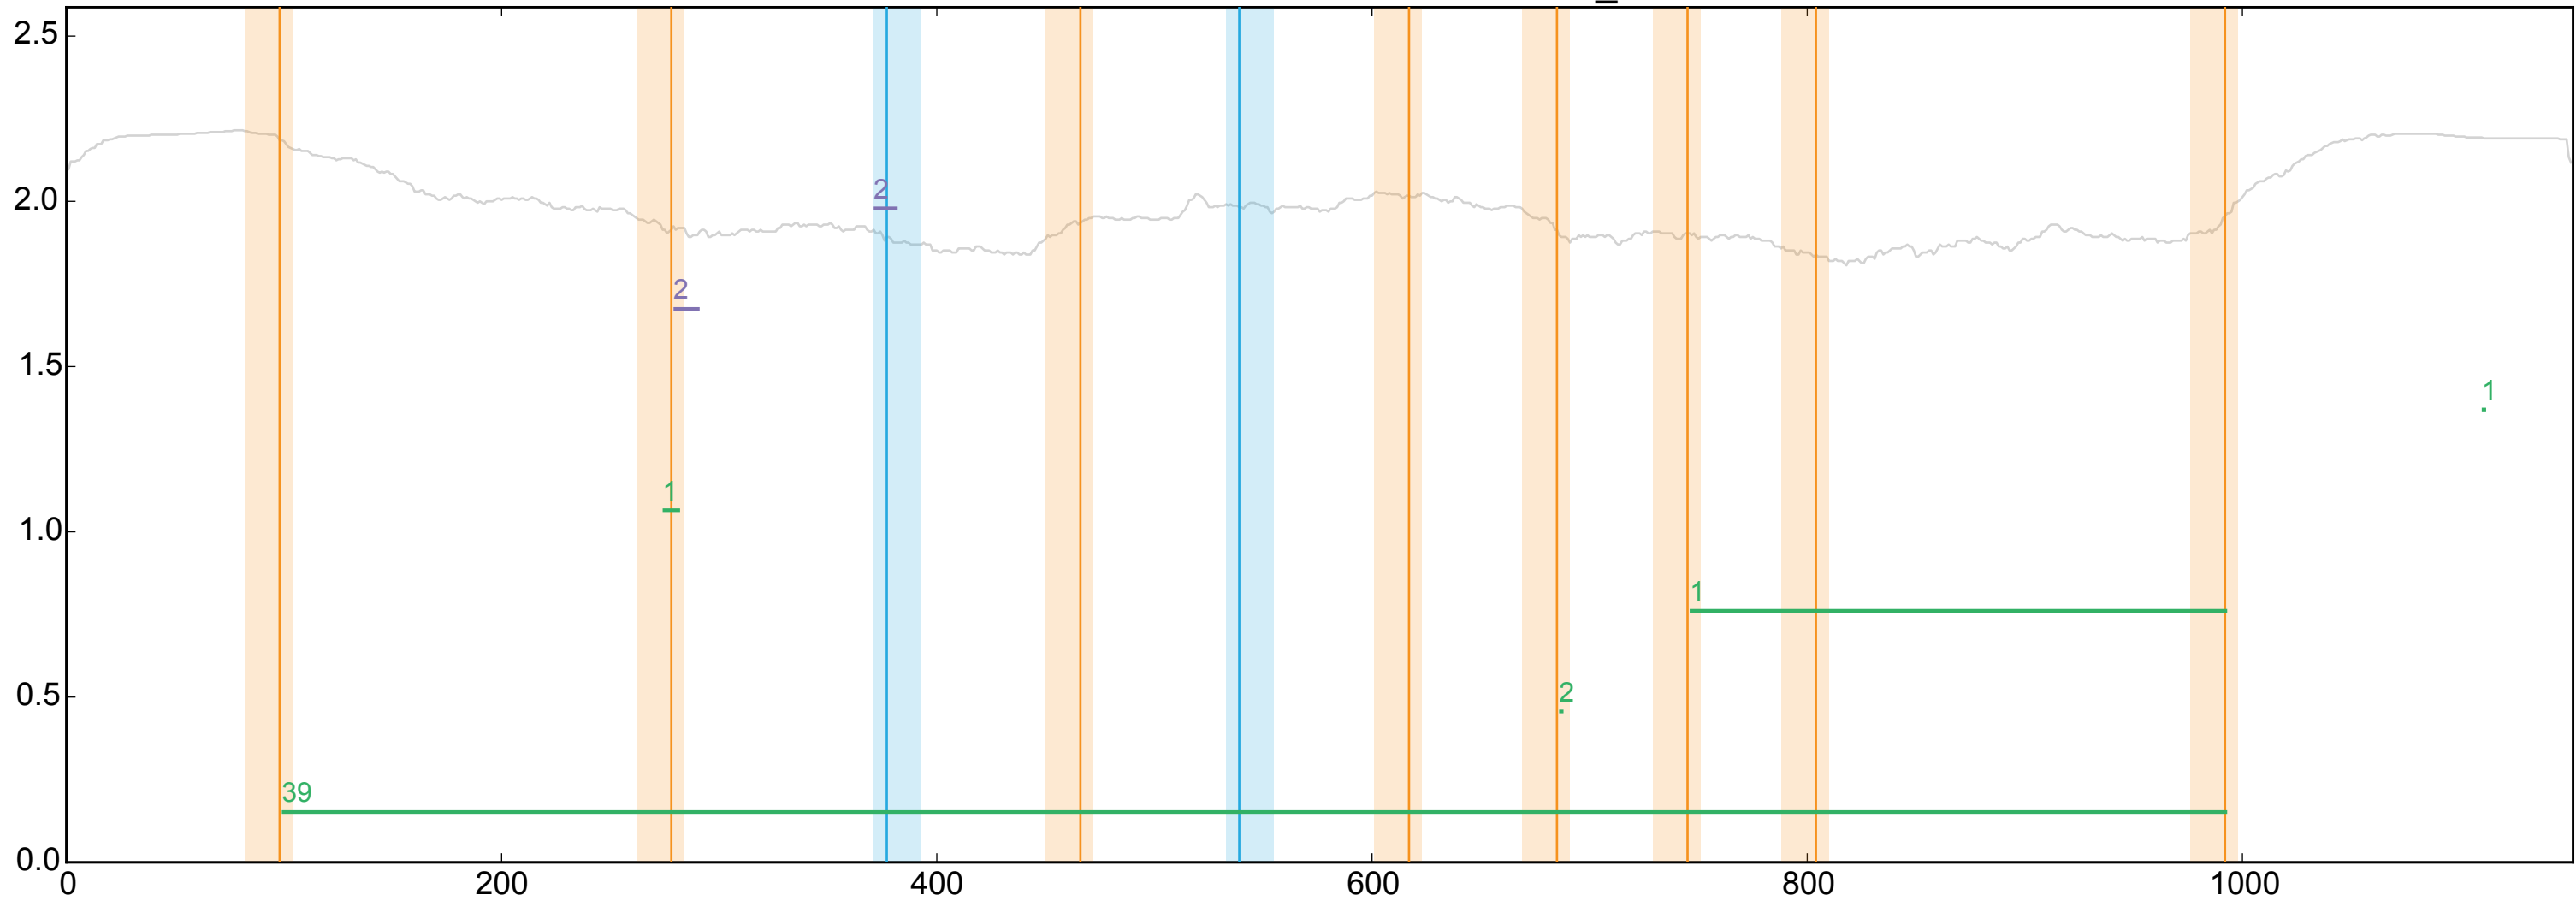

WT ENSDARG00000079302\_0

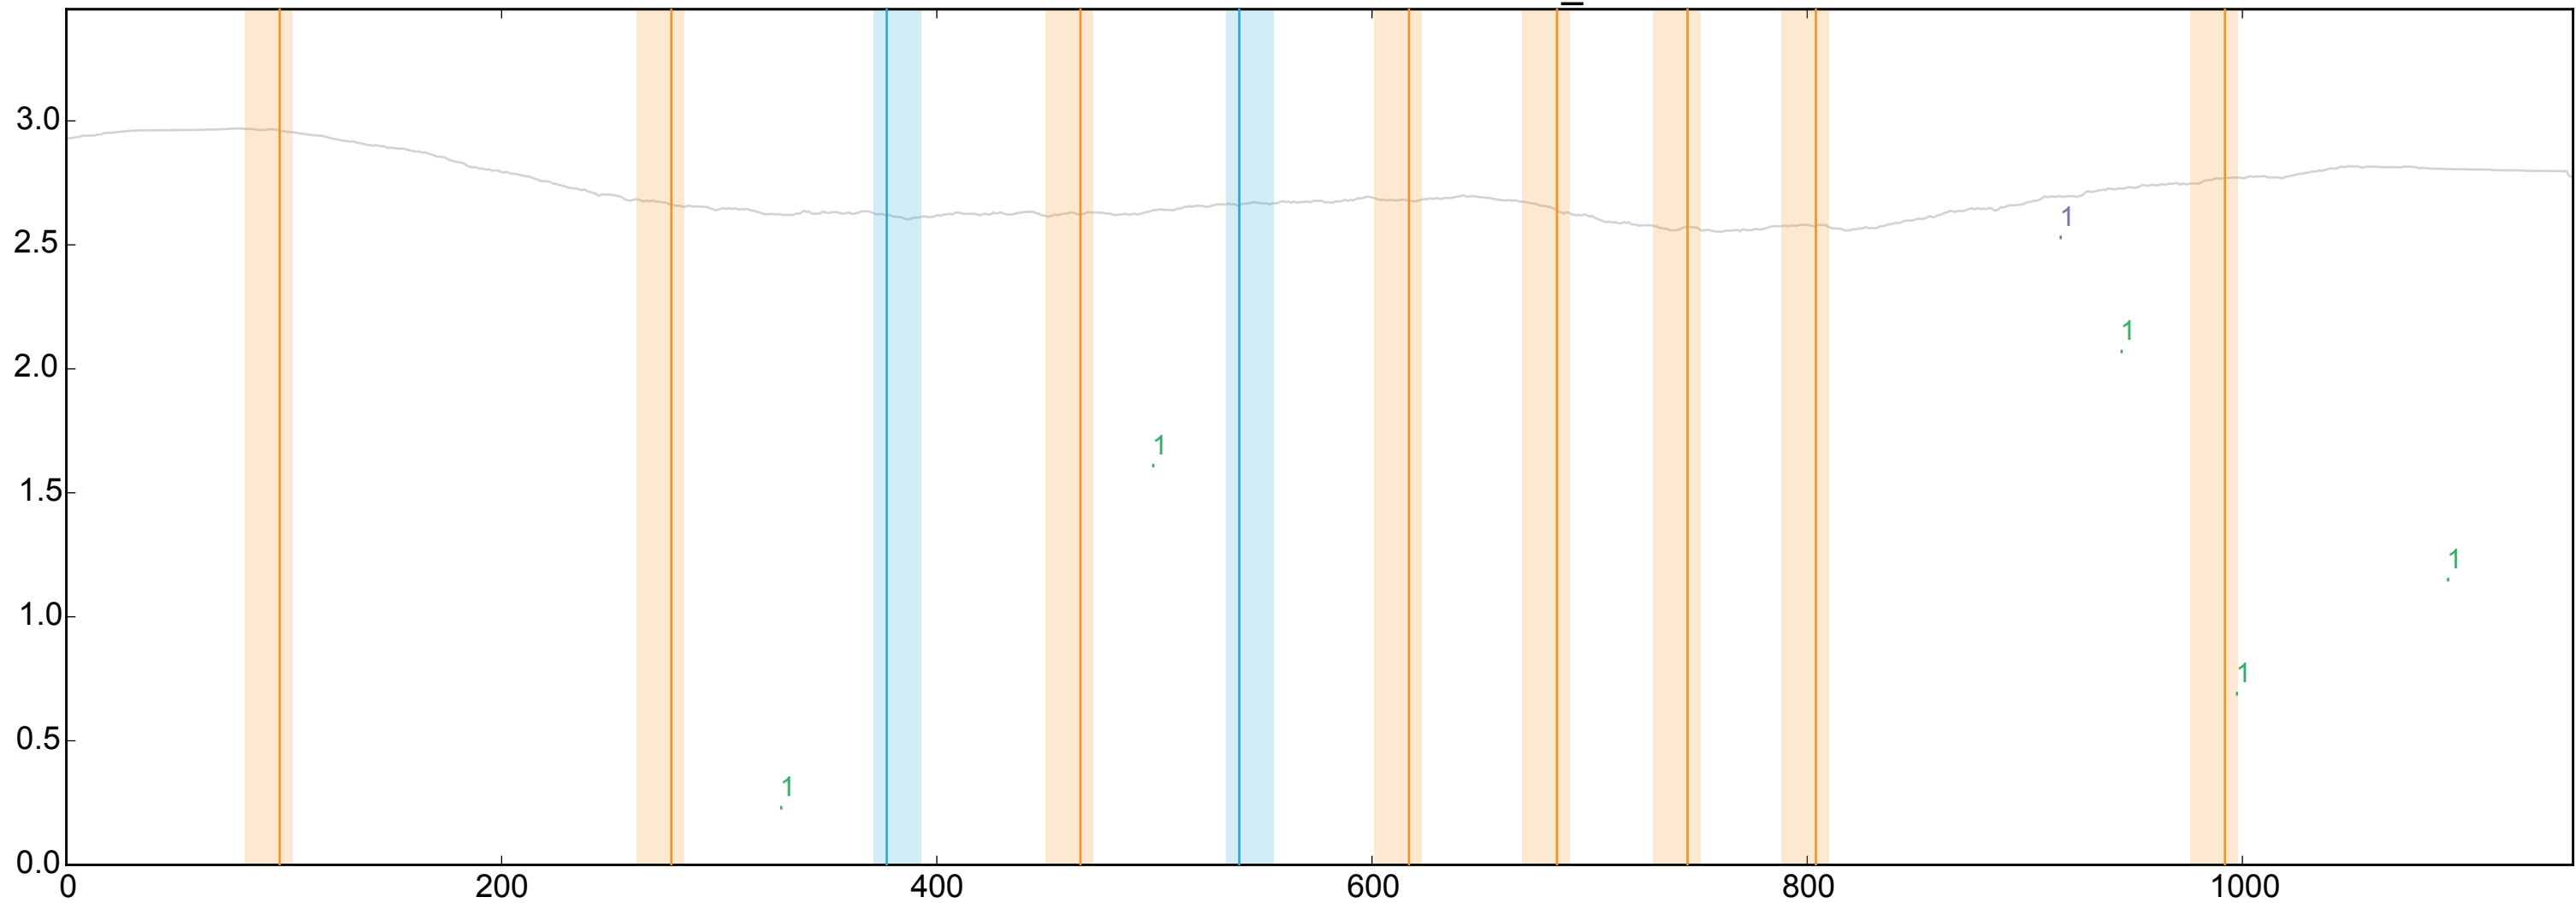

Mutant ENSDARG00000076292\_19

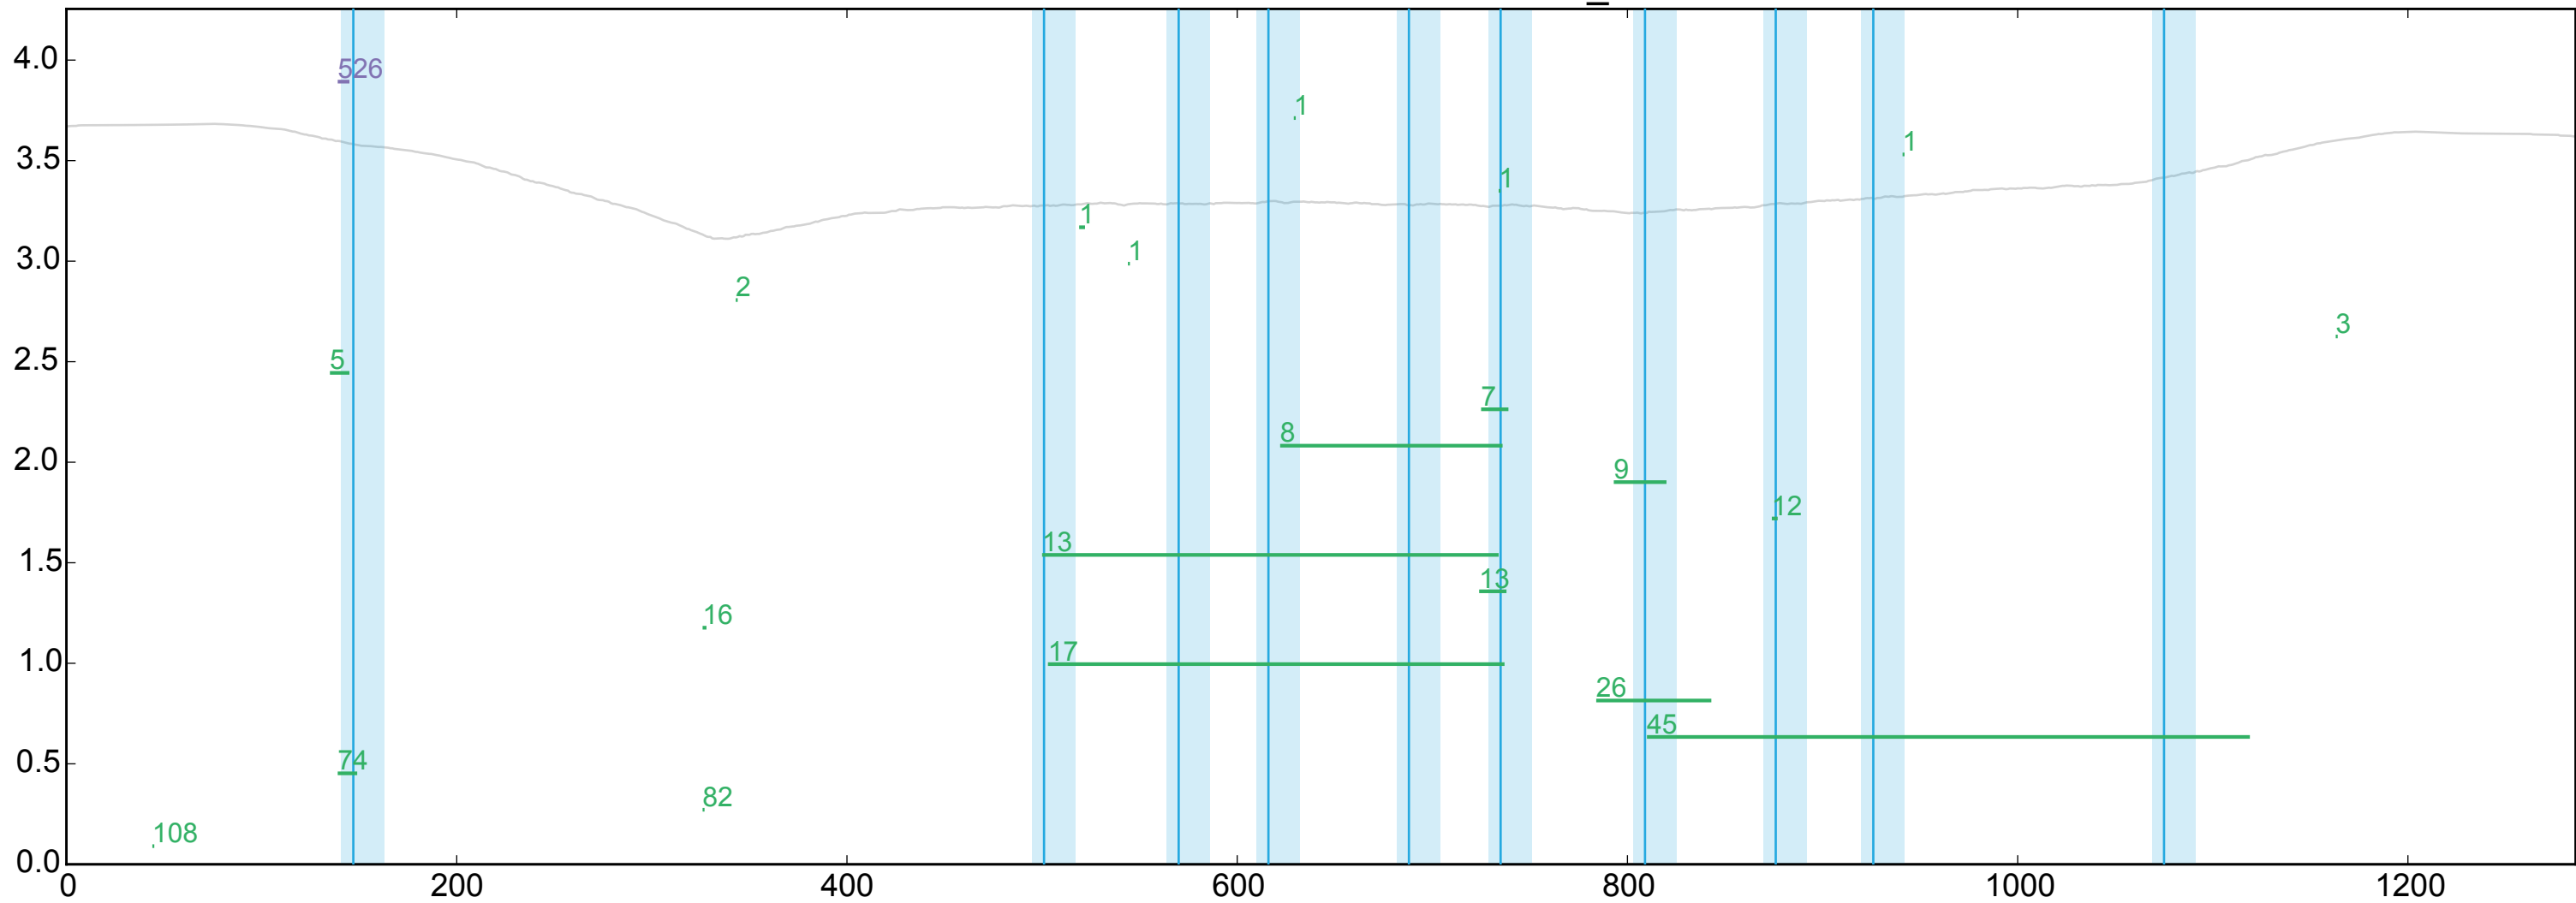

WT ENSDARG00000076292\_19

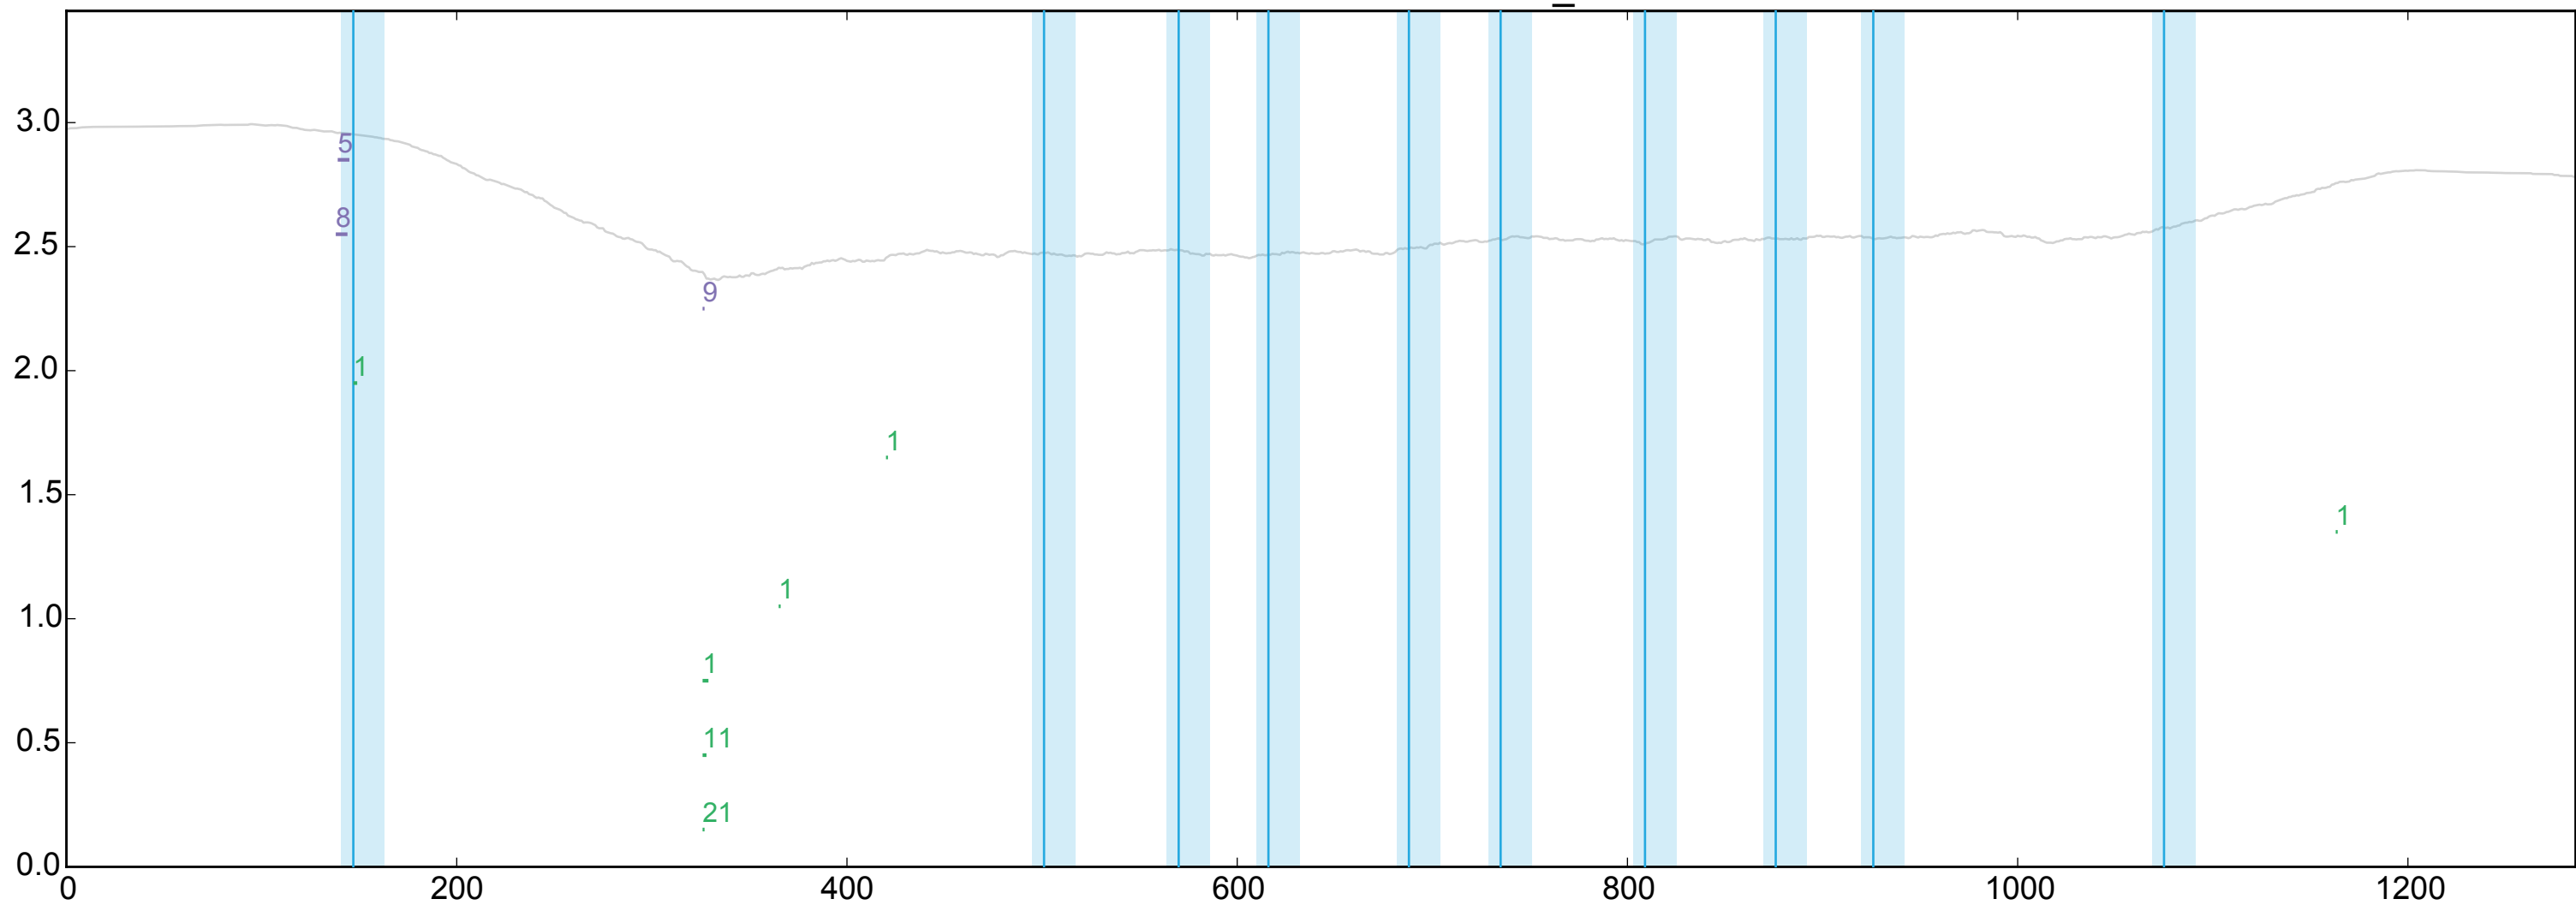

Mutant ENSDARG00000037060\_32

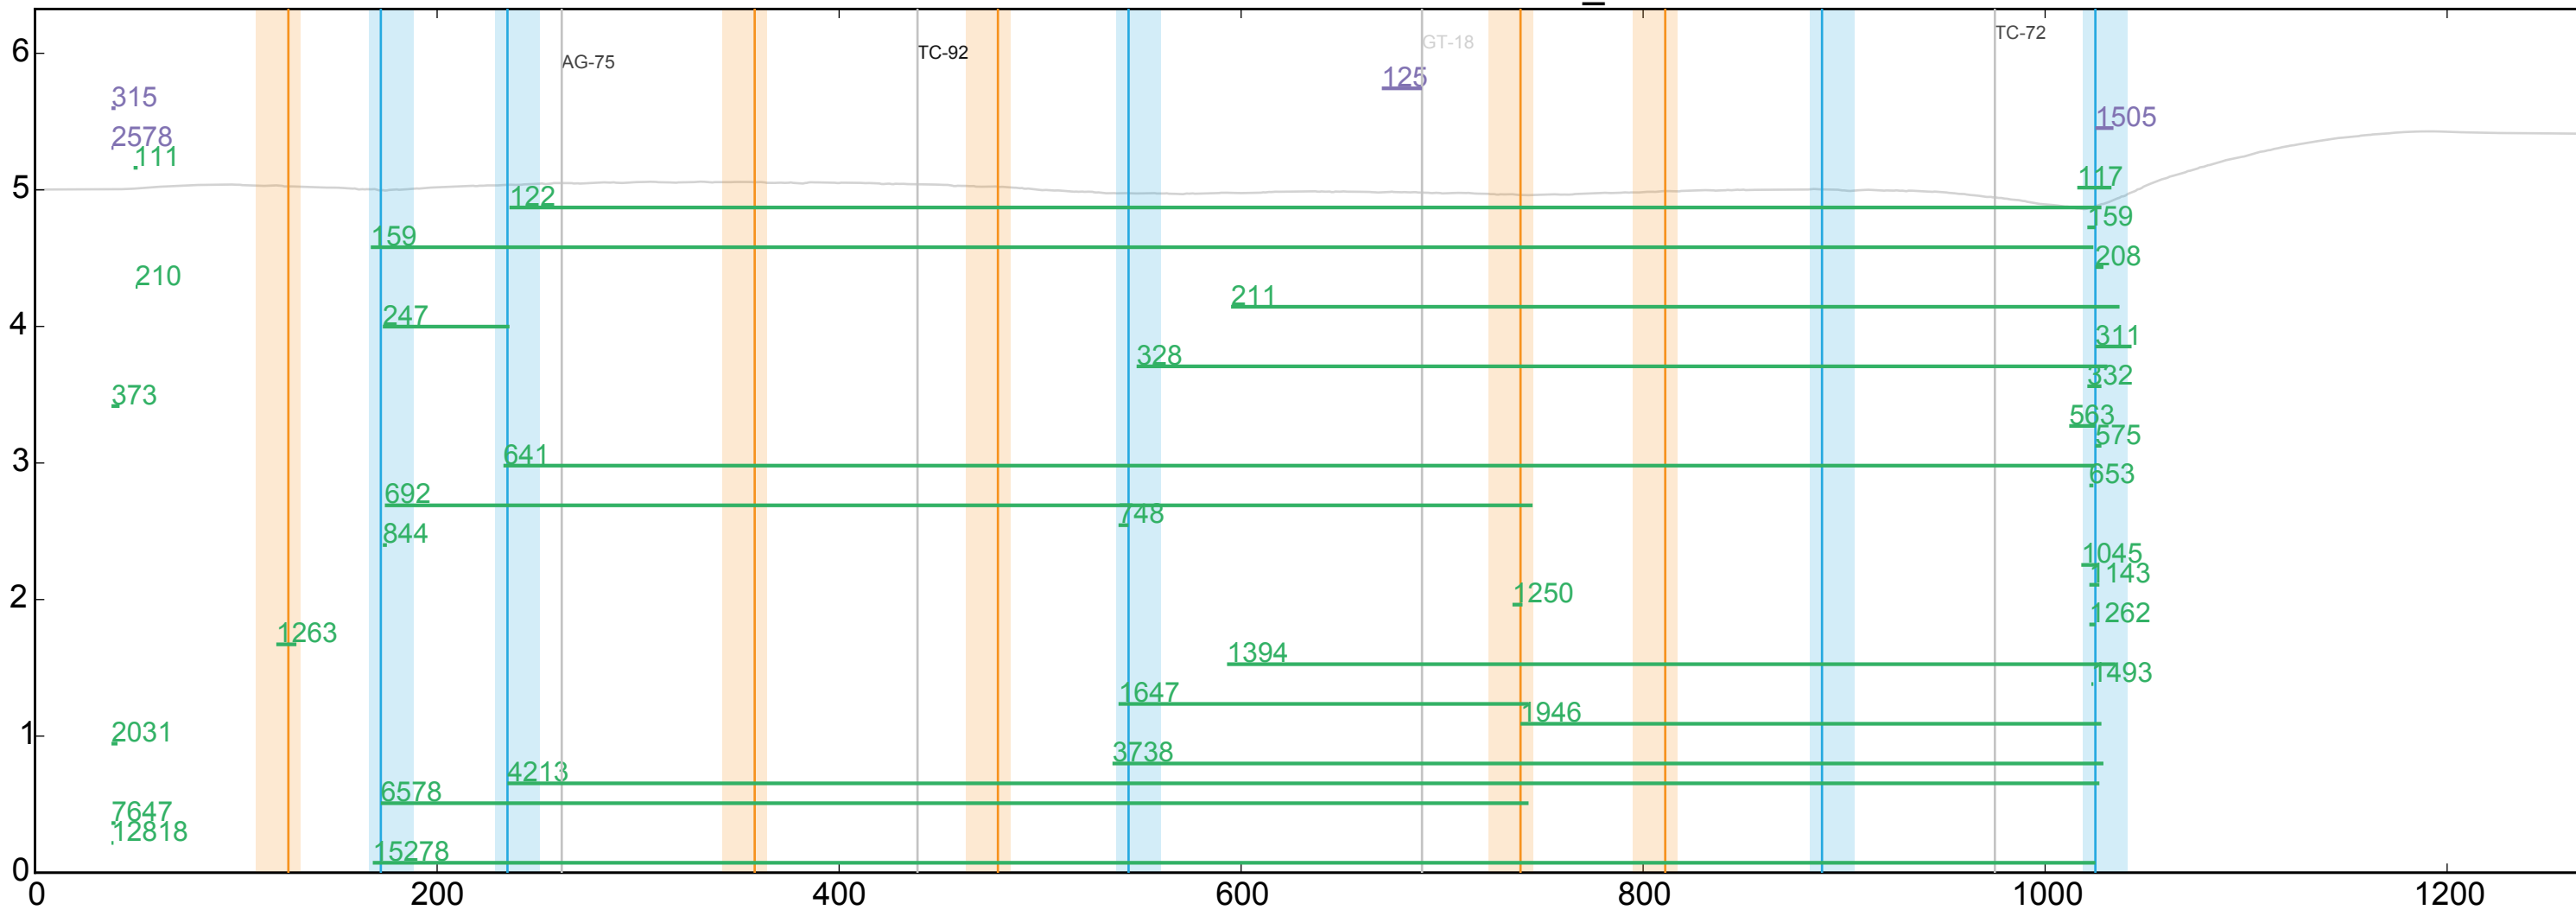

WT ENSDARG00000037060\_32

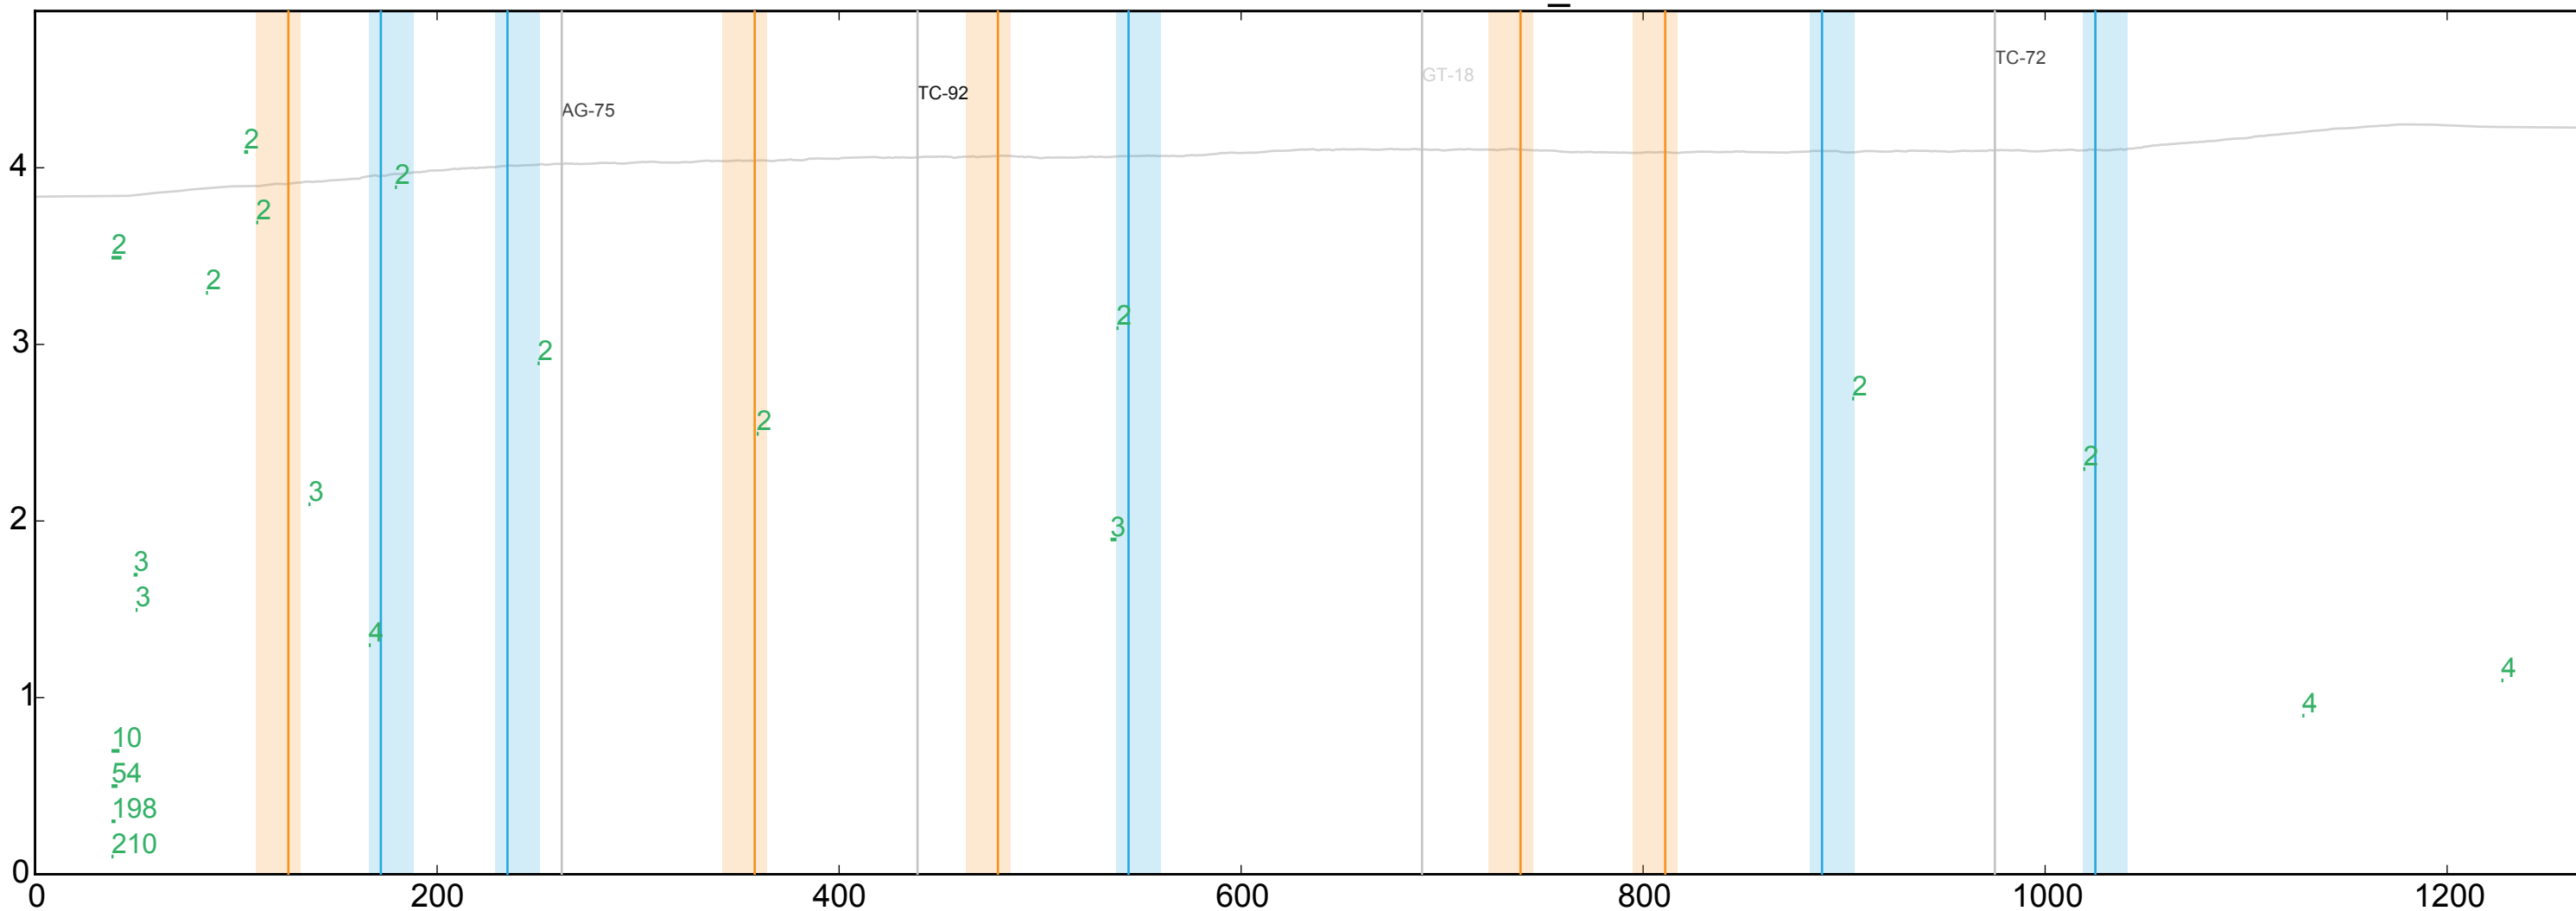

Mutant ENSDARG00000068397\_9

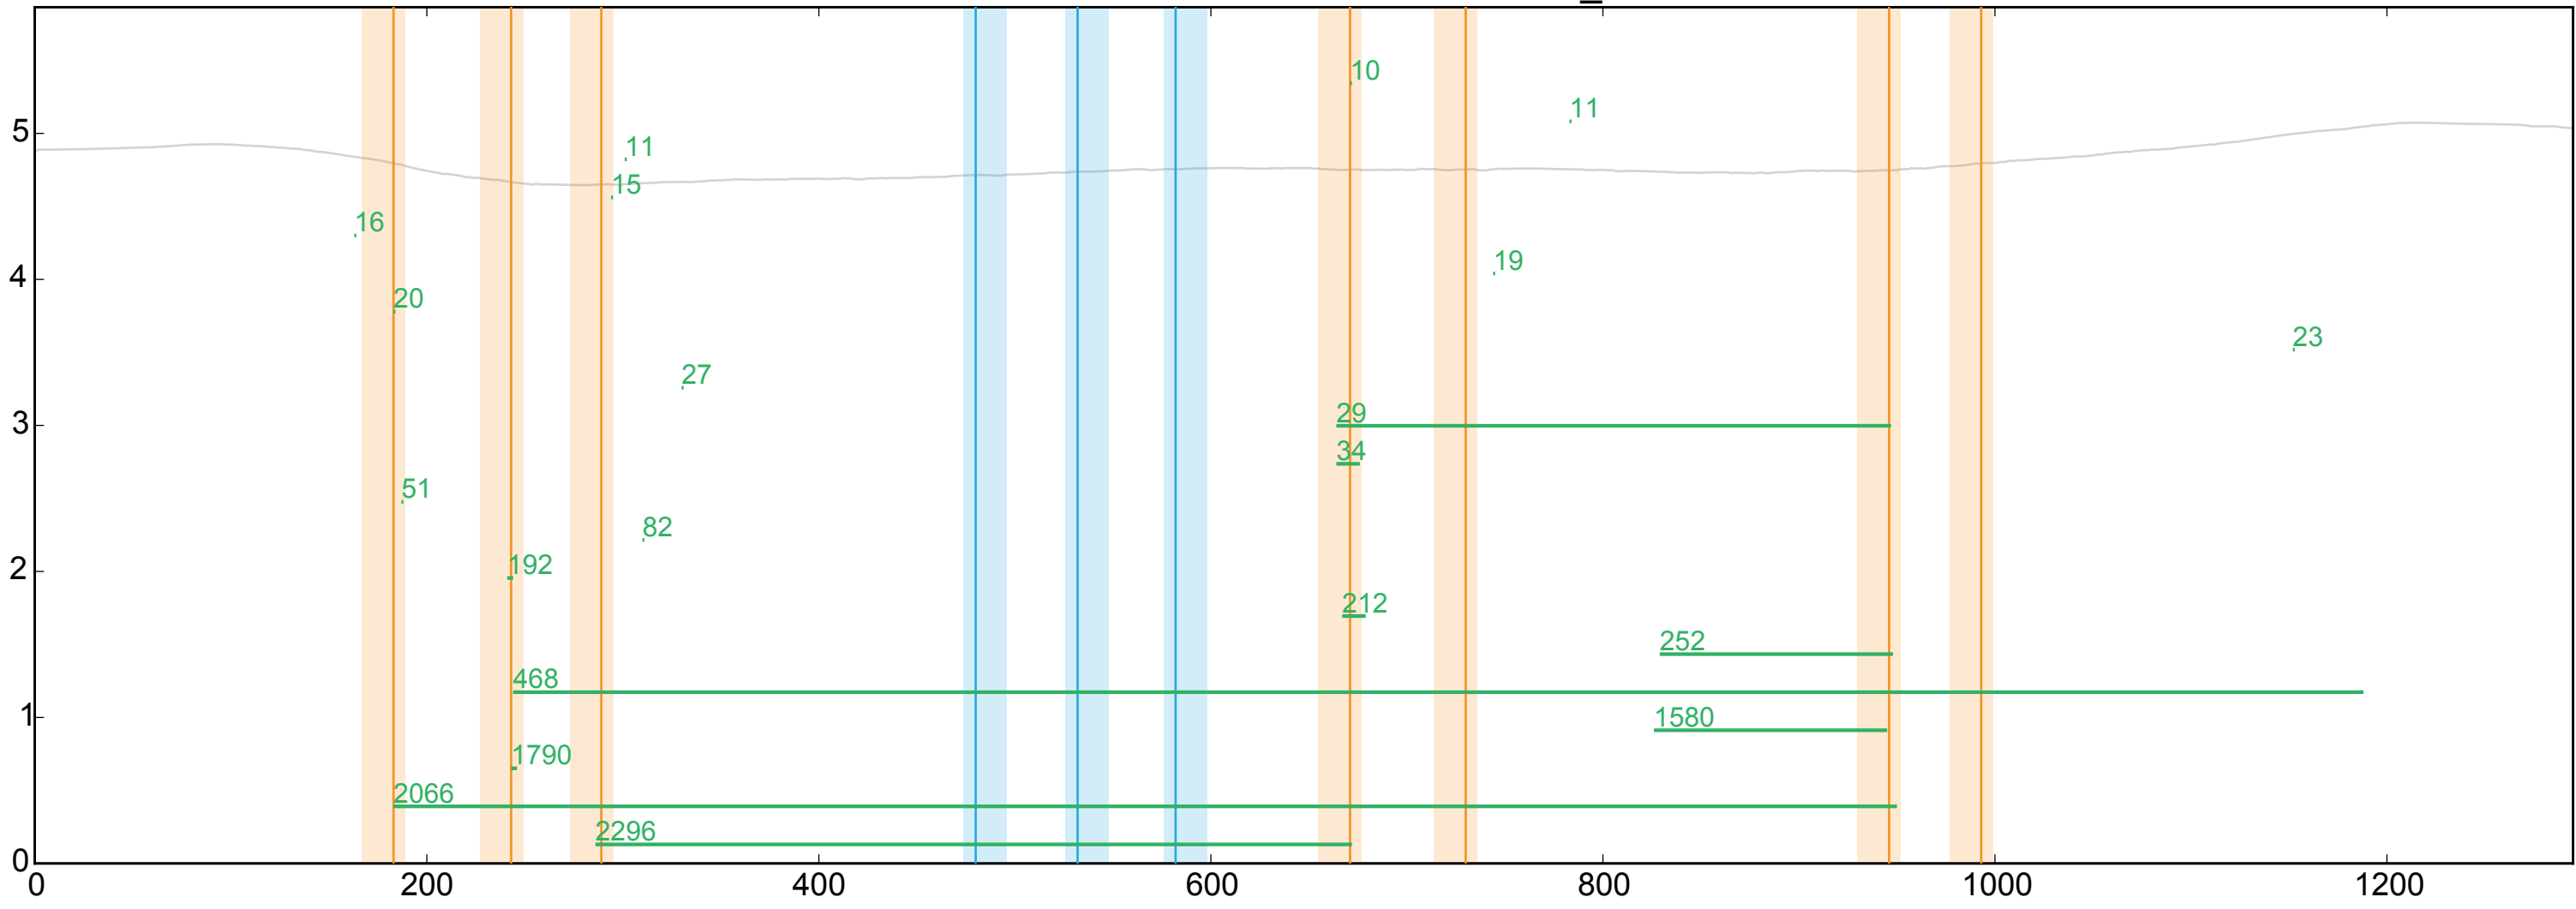

WT ENSDARG00000068397\_9

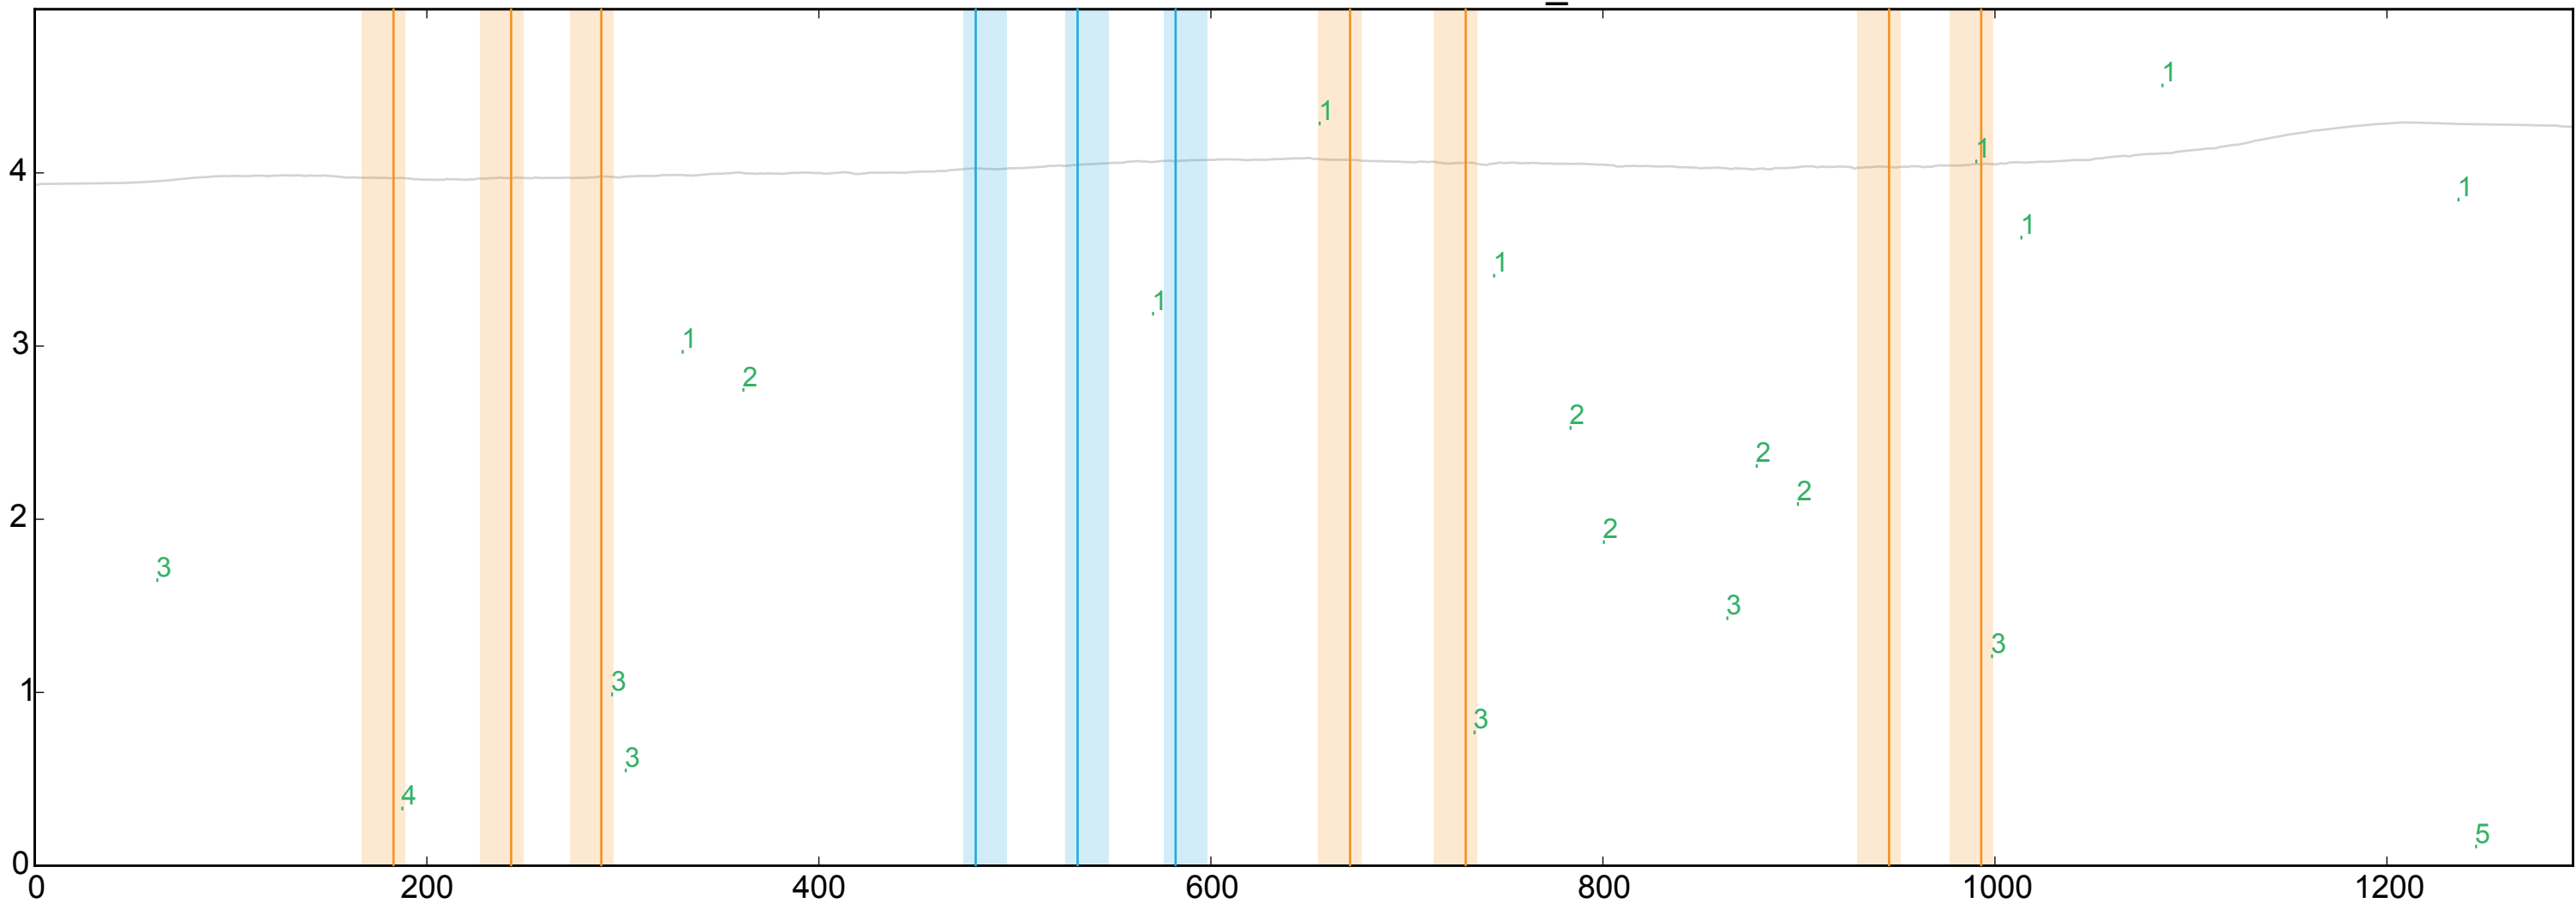

Mutant ENSDARG00000042032\_1

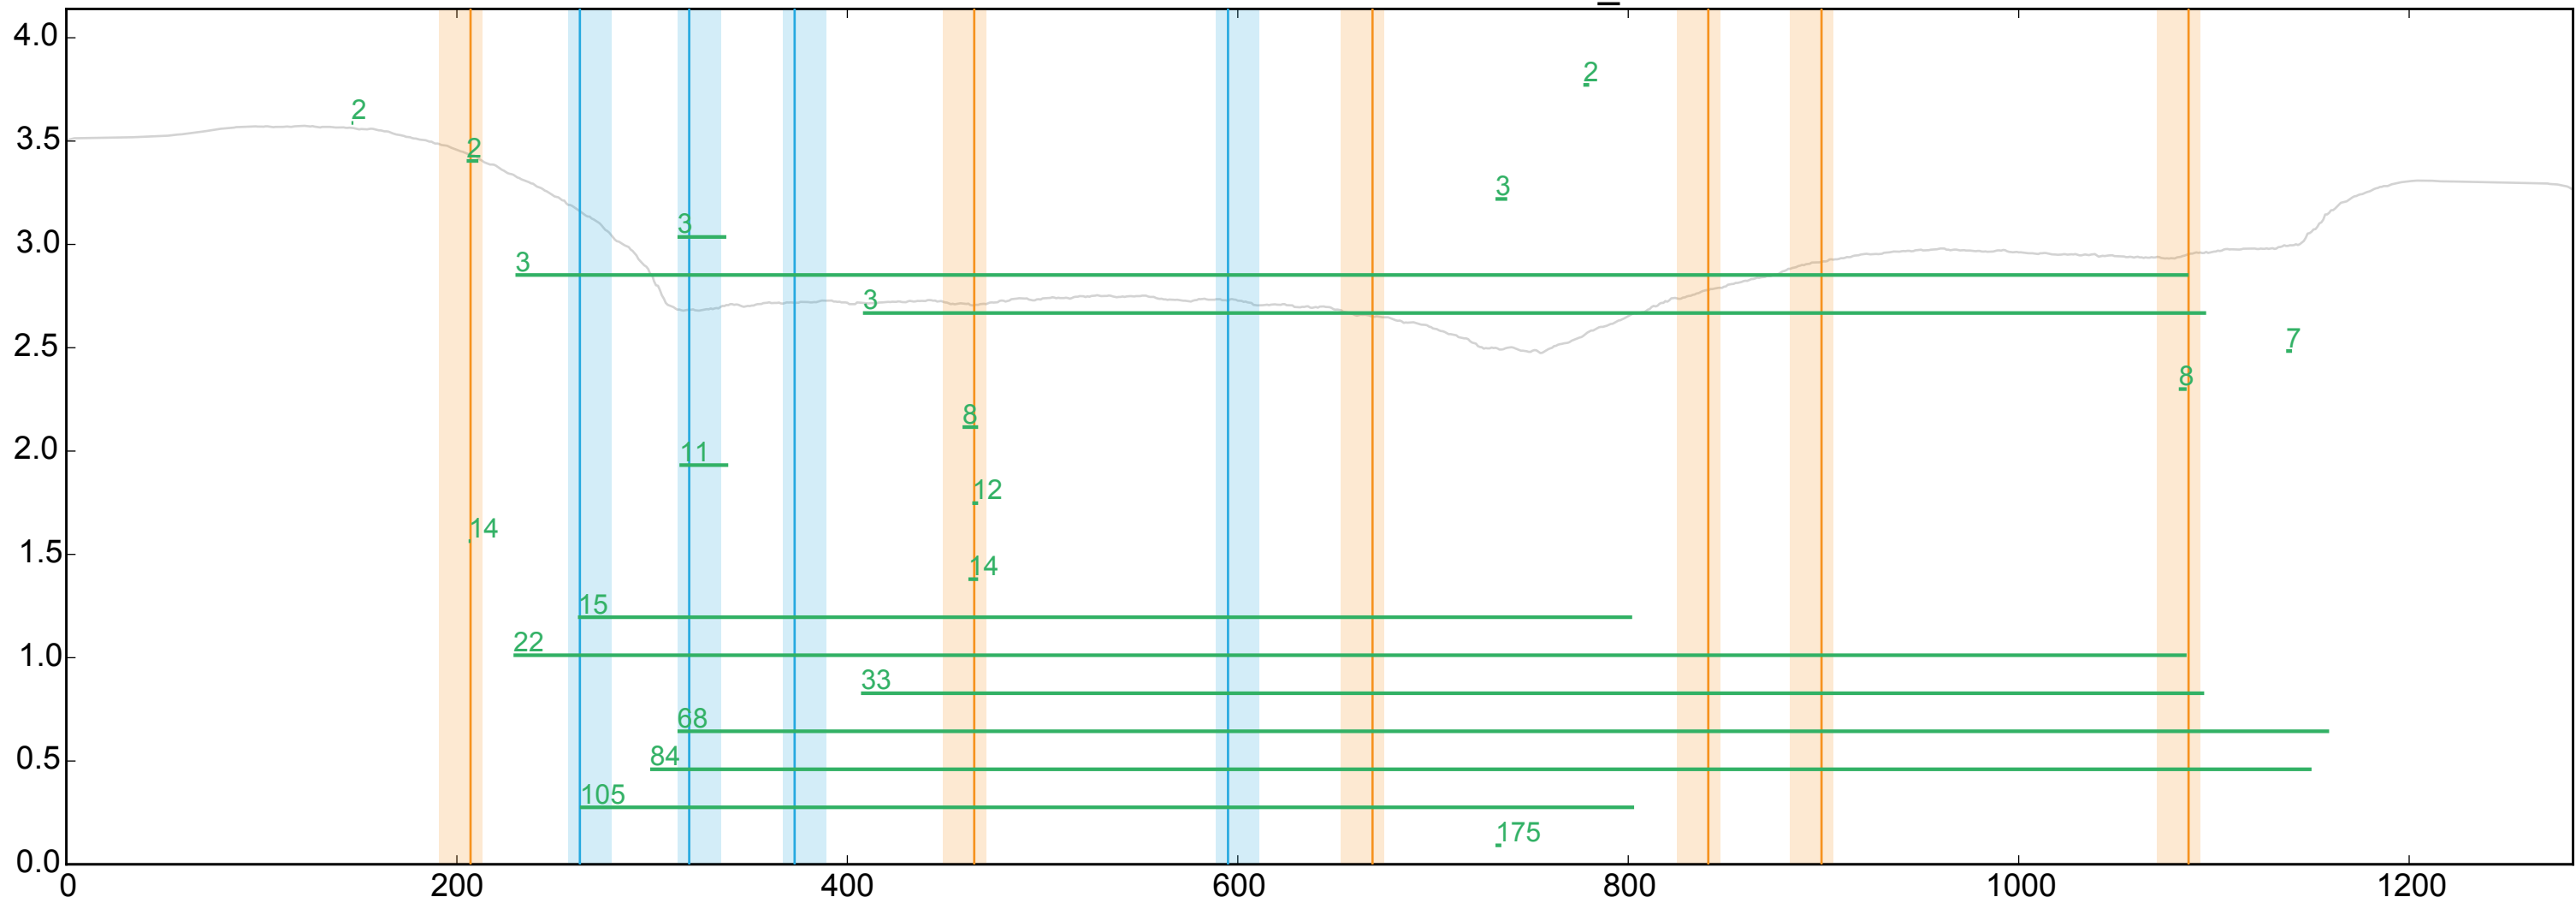

WT ENSDARG00000042032\_1

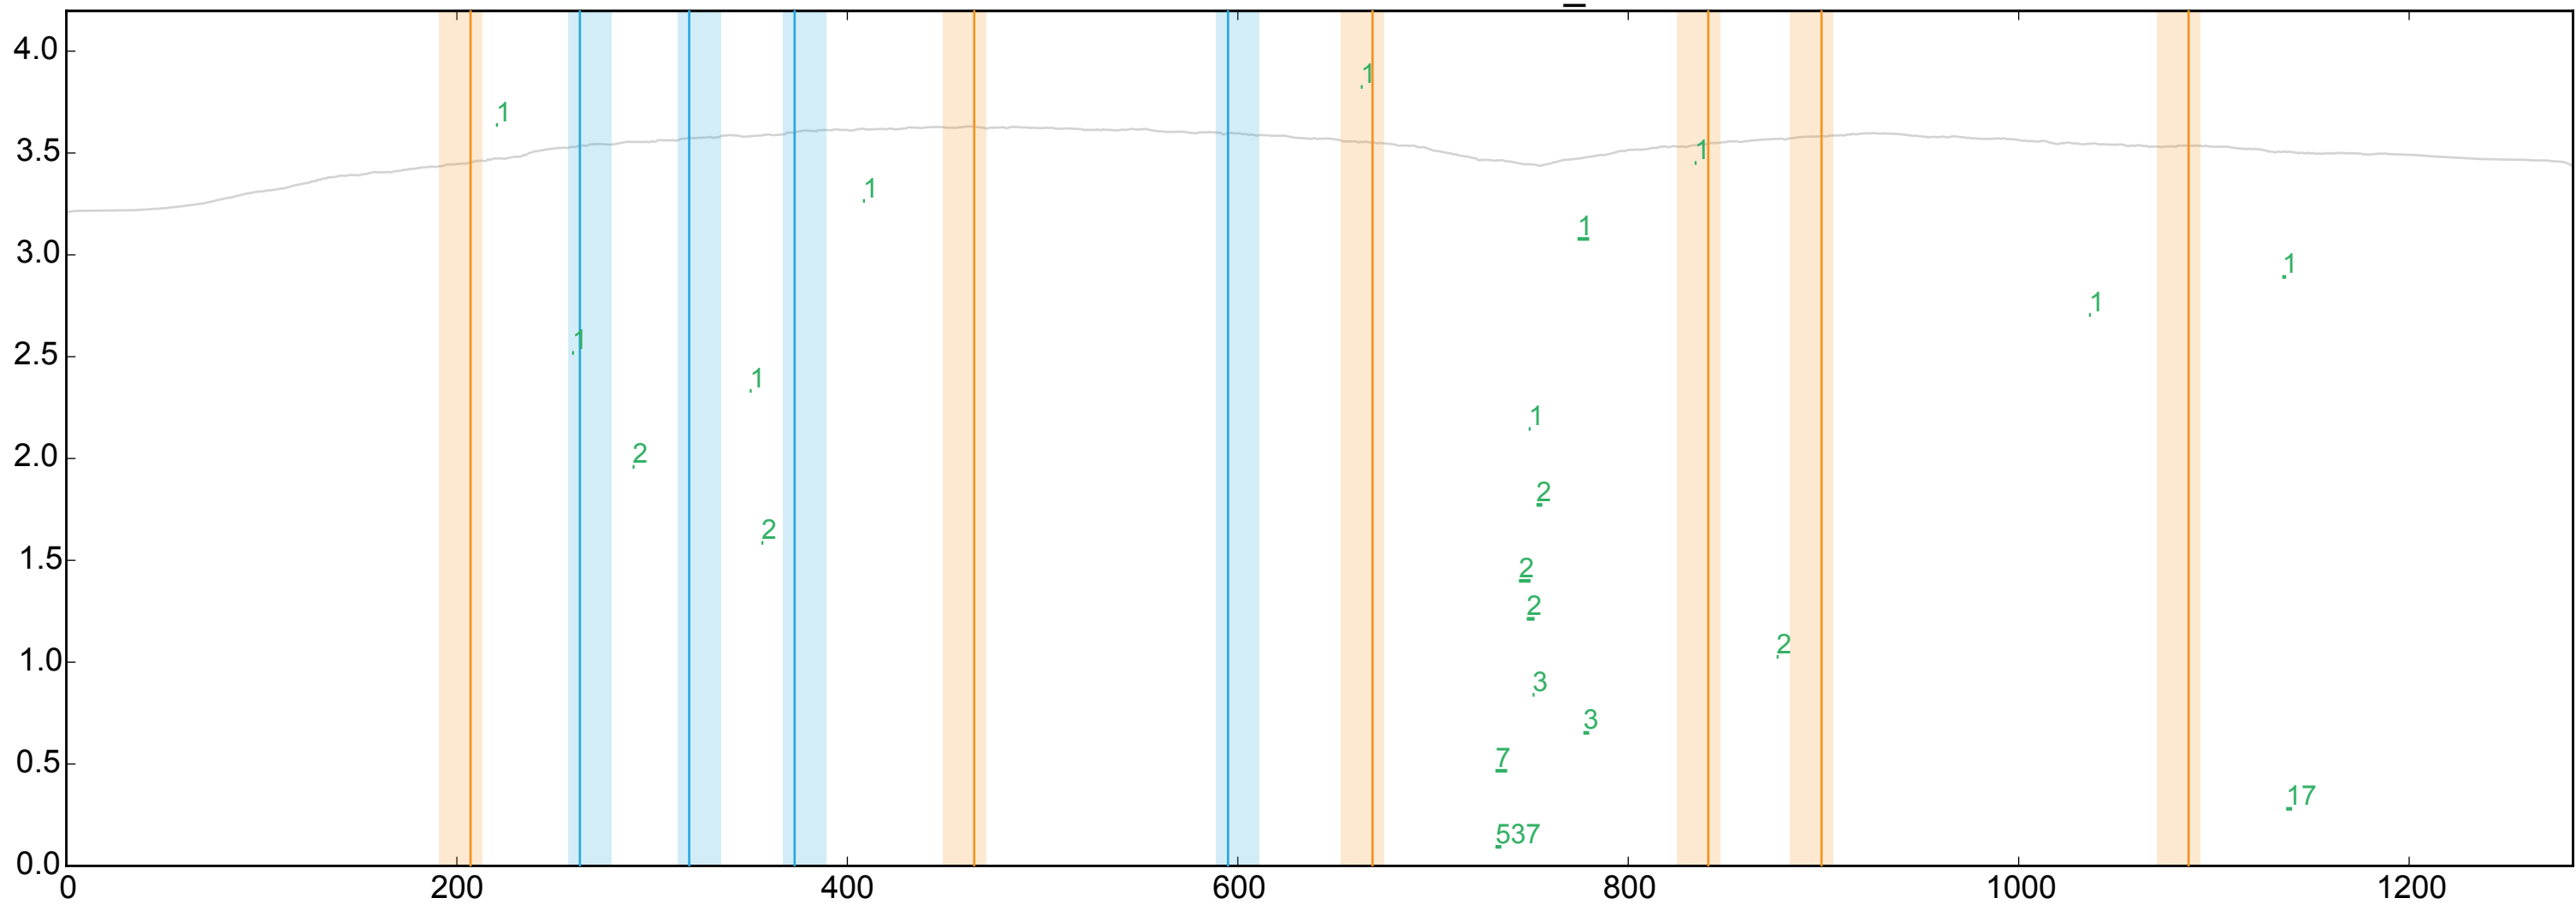



Mutant ENSDARG00000076177\_24

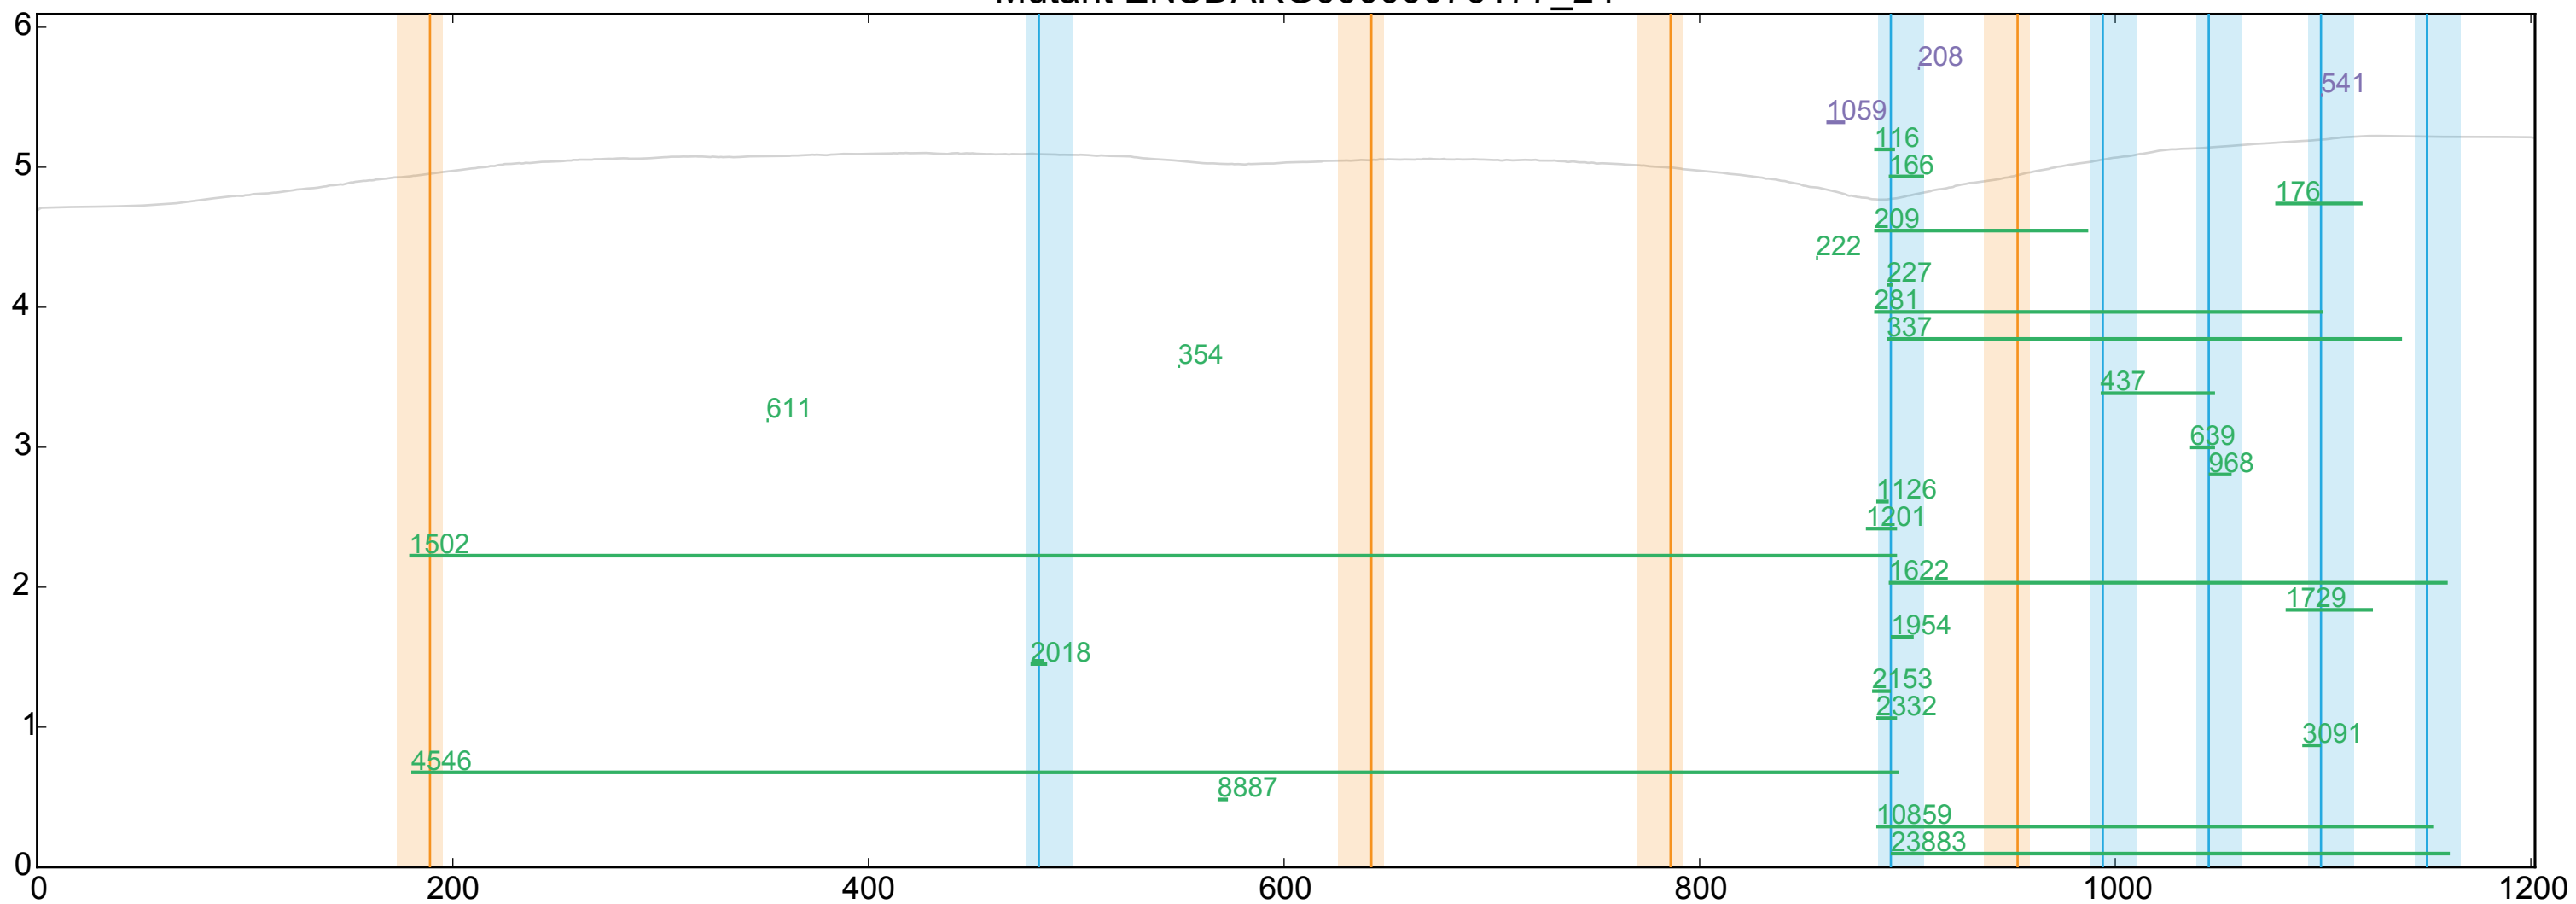

WT ENSDARG00000076177\_24

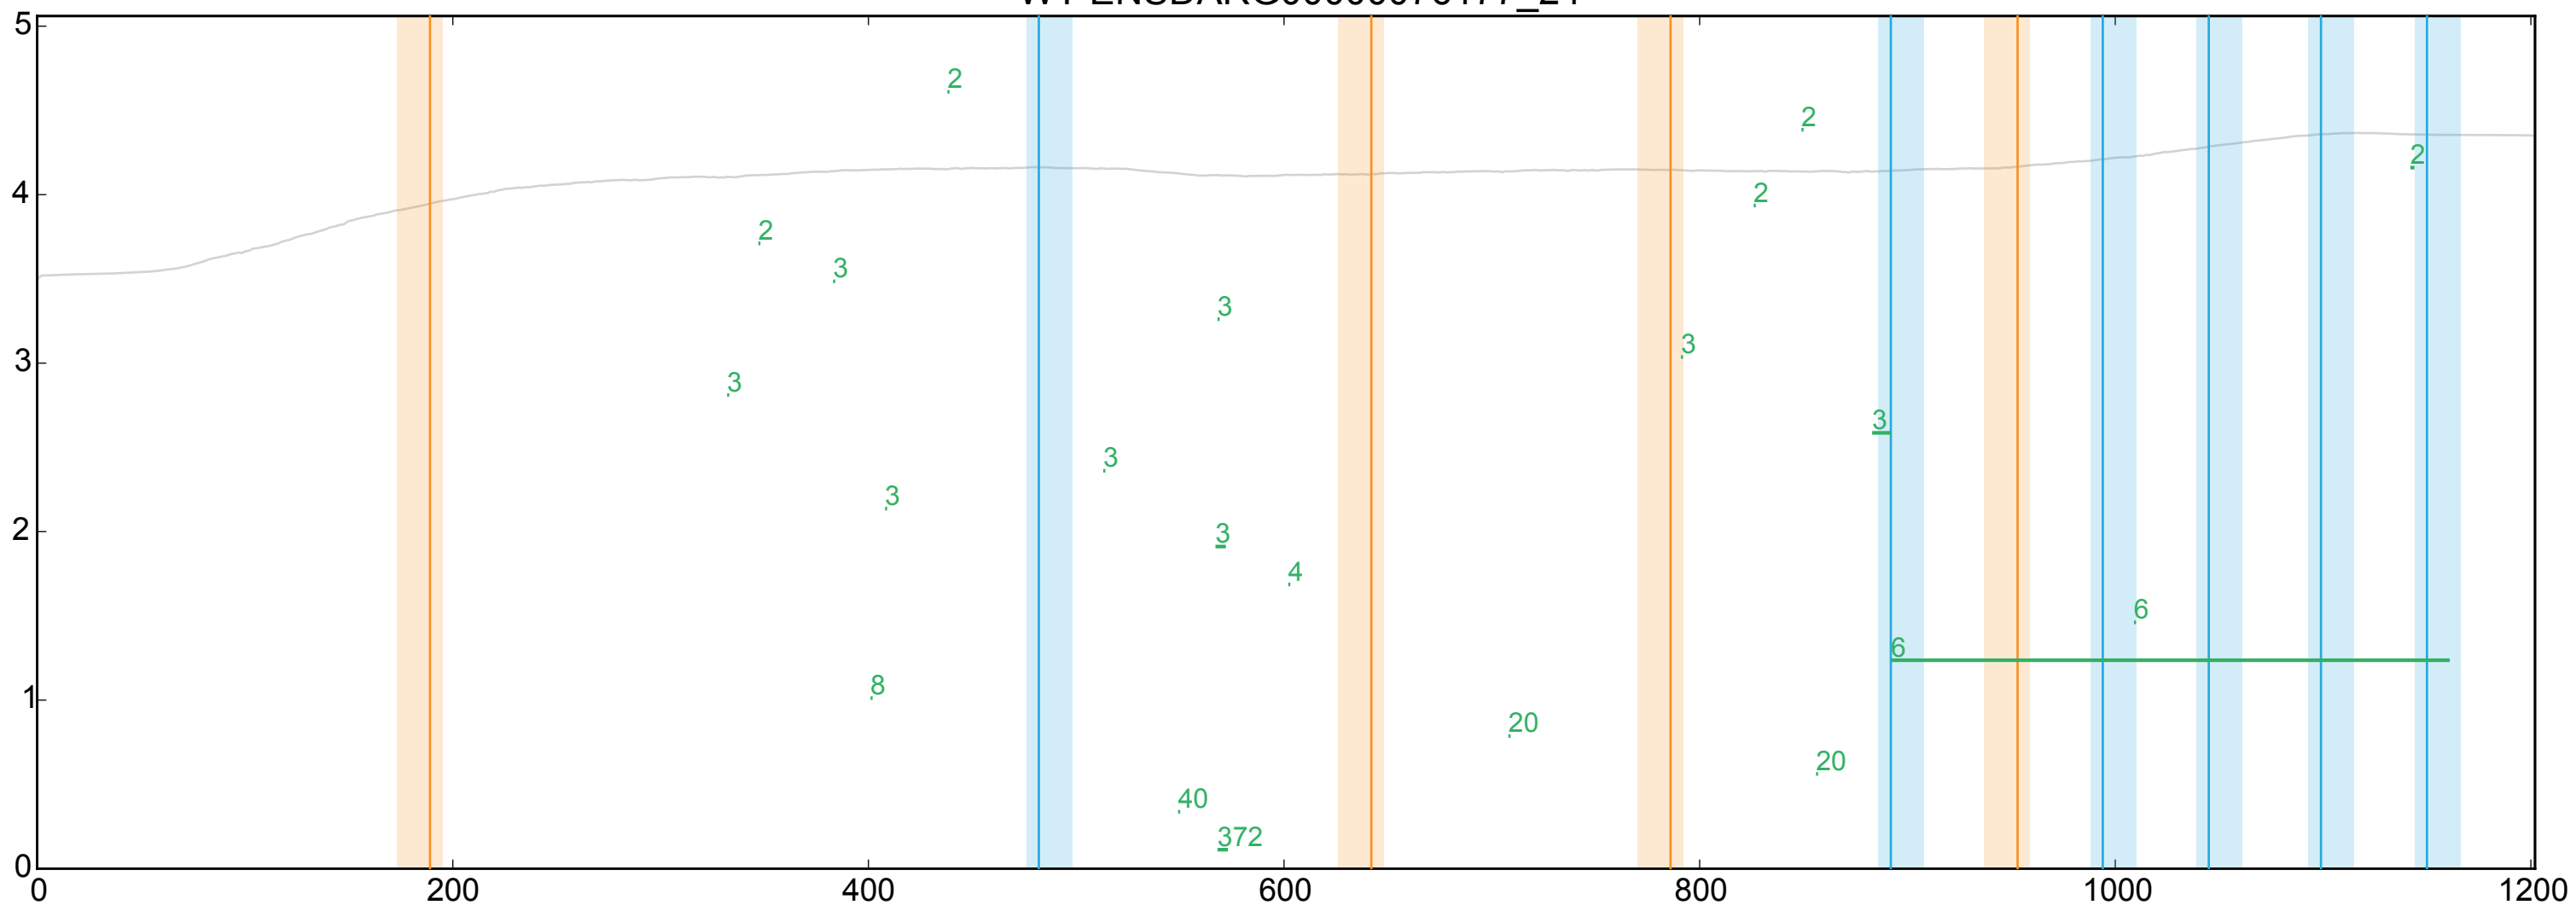

Mutant ENSDARG00000060697\_9

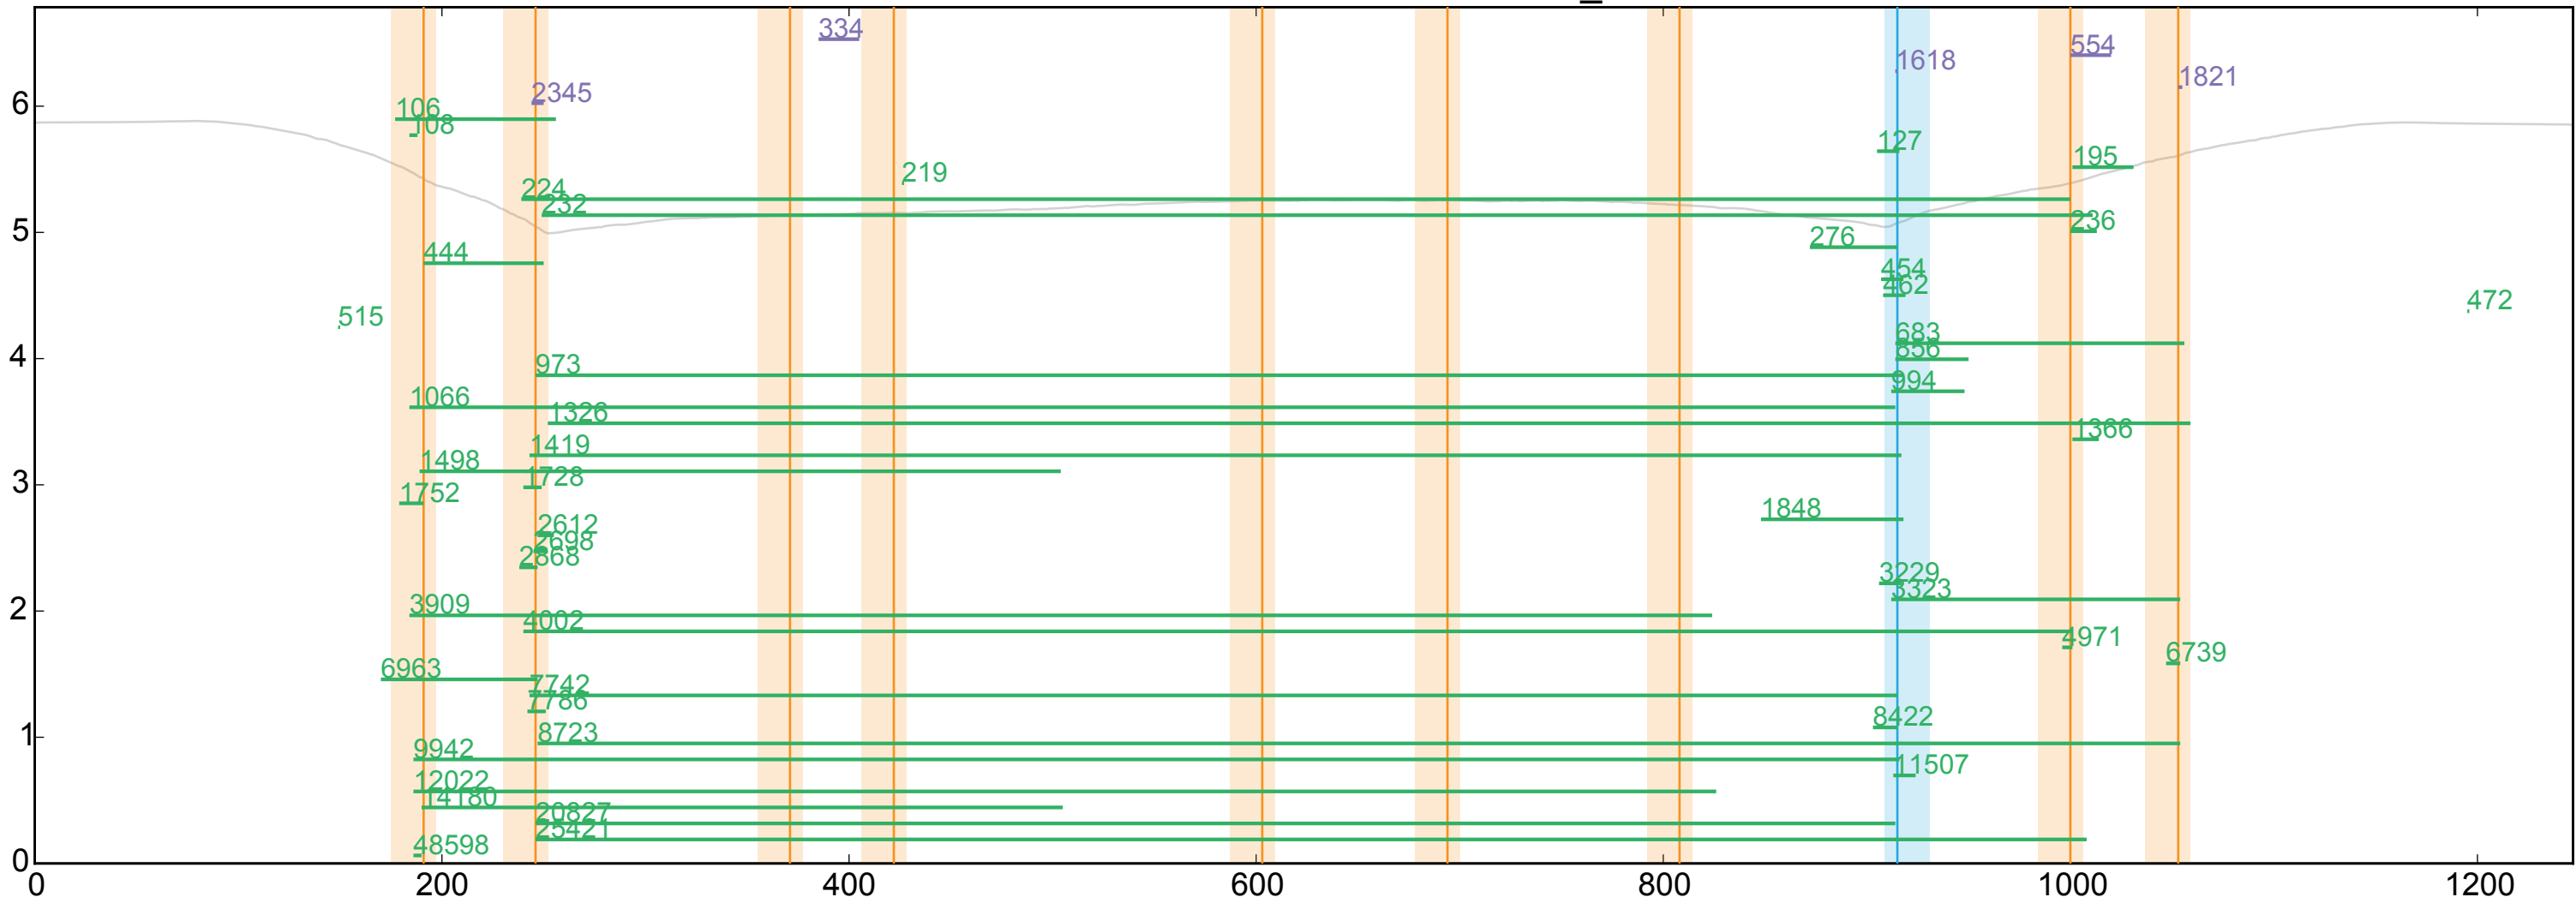

WT ENSDARG00000060697\_9

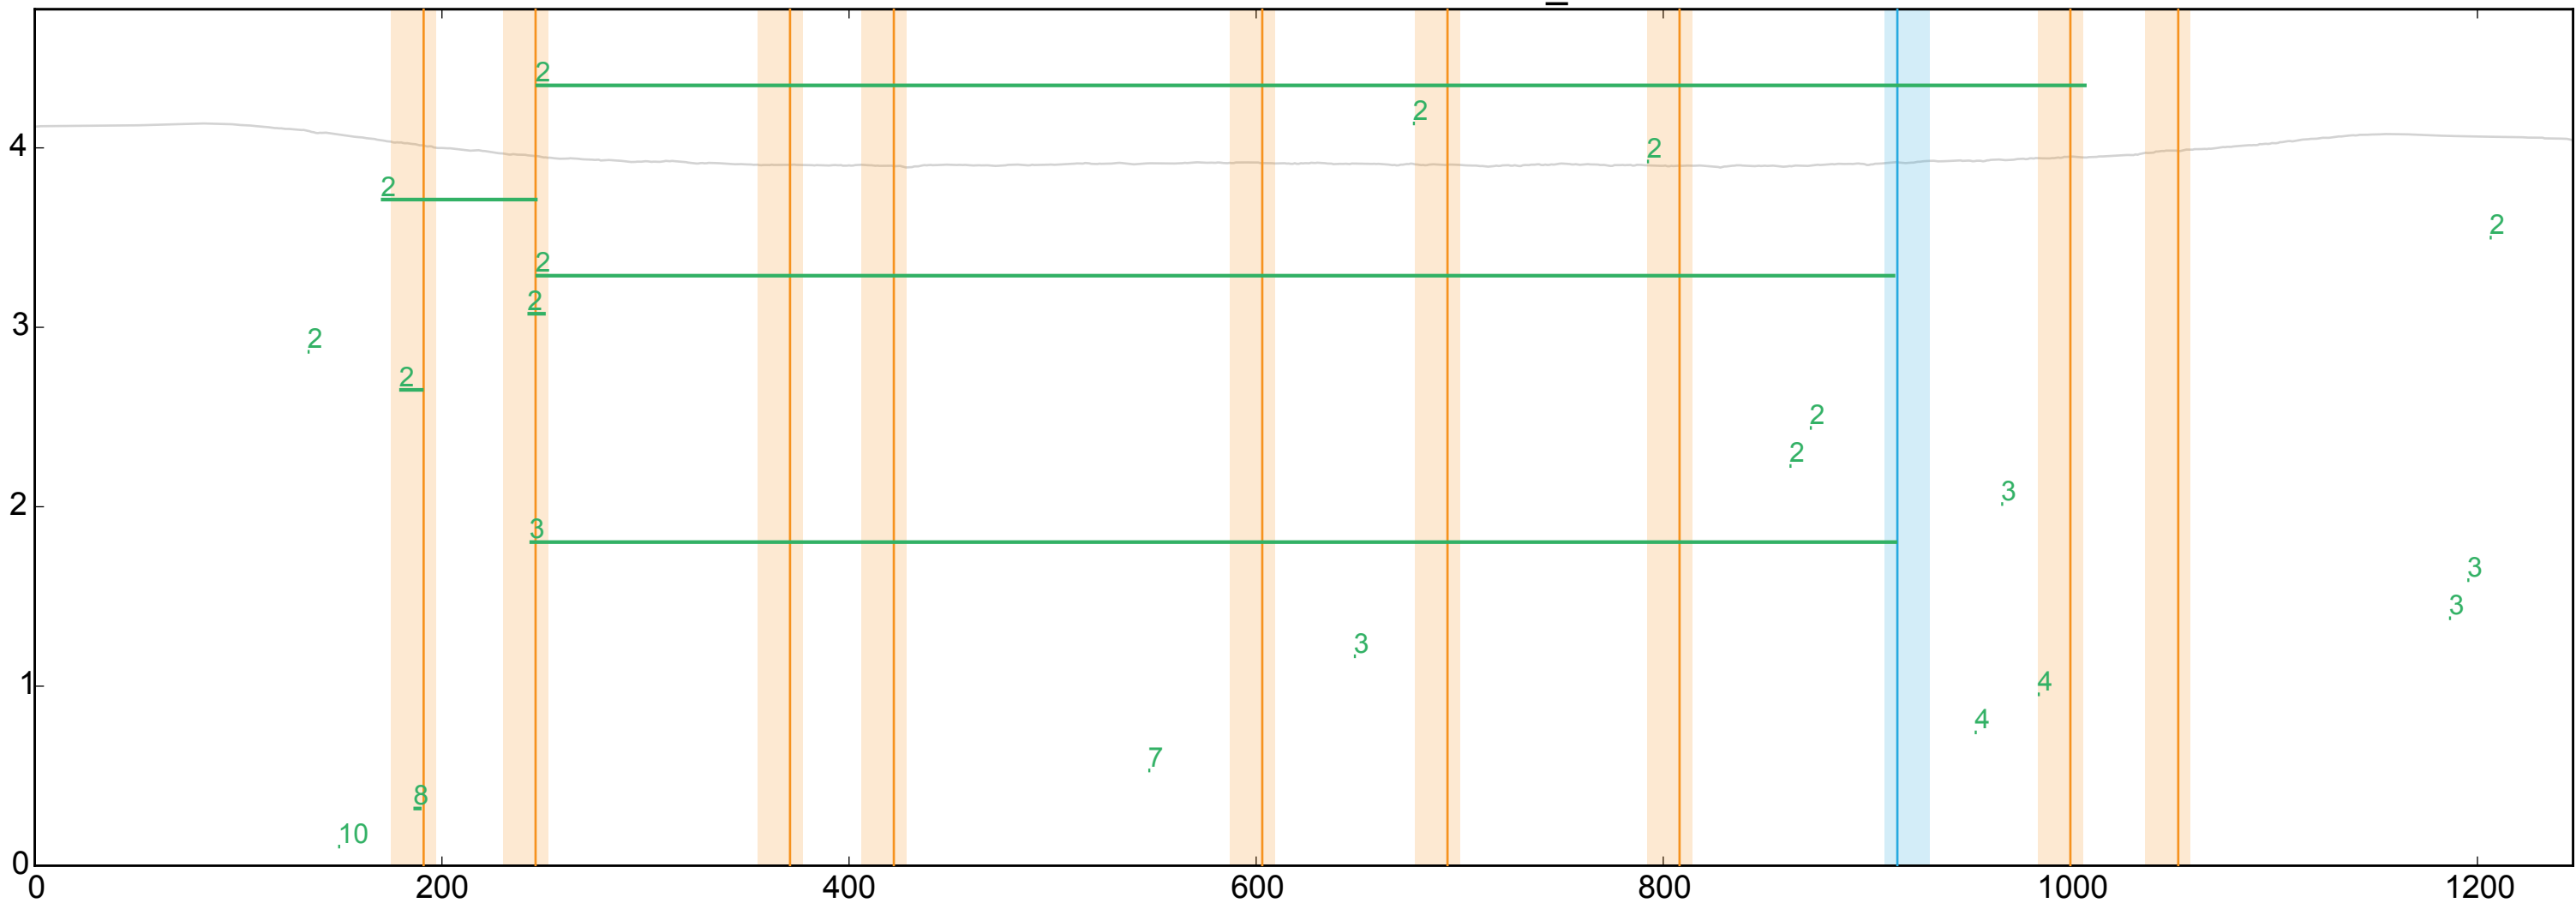



Mutant ENSDARG00000078578\_0

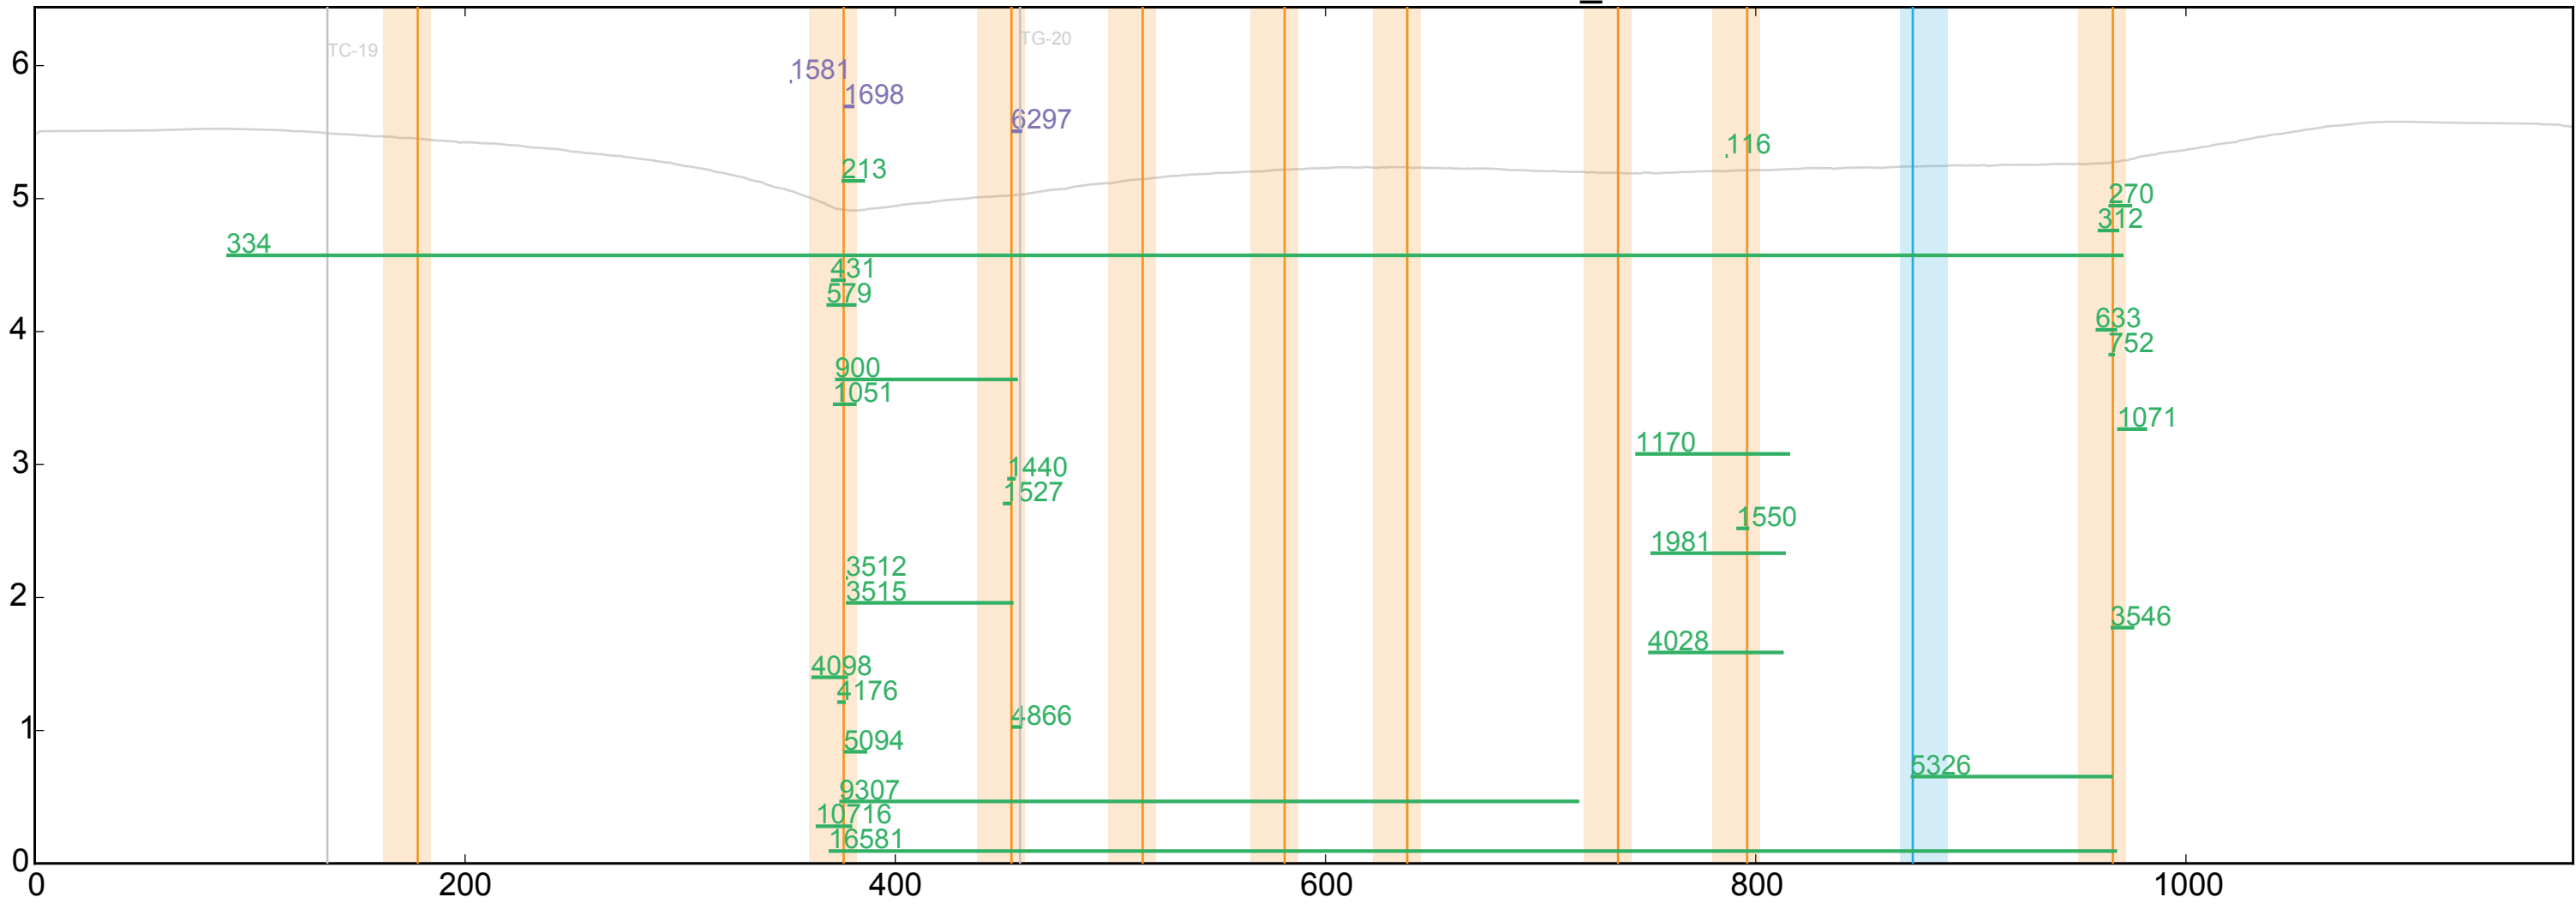

WT ENSDARG00000078578\_0

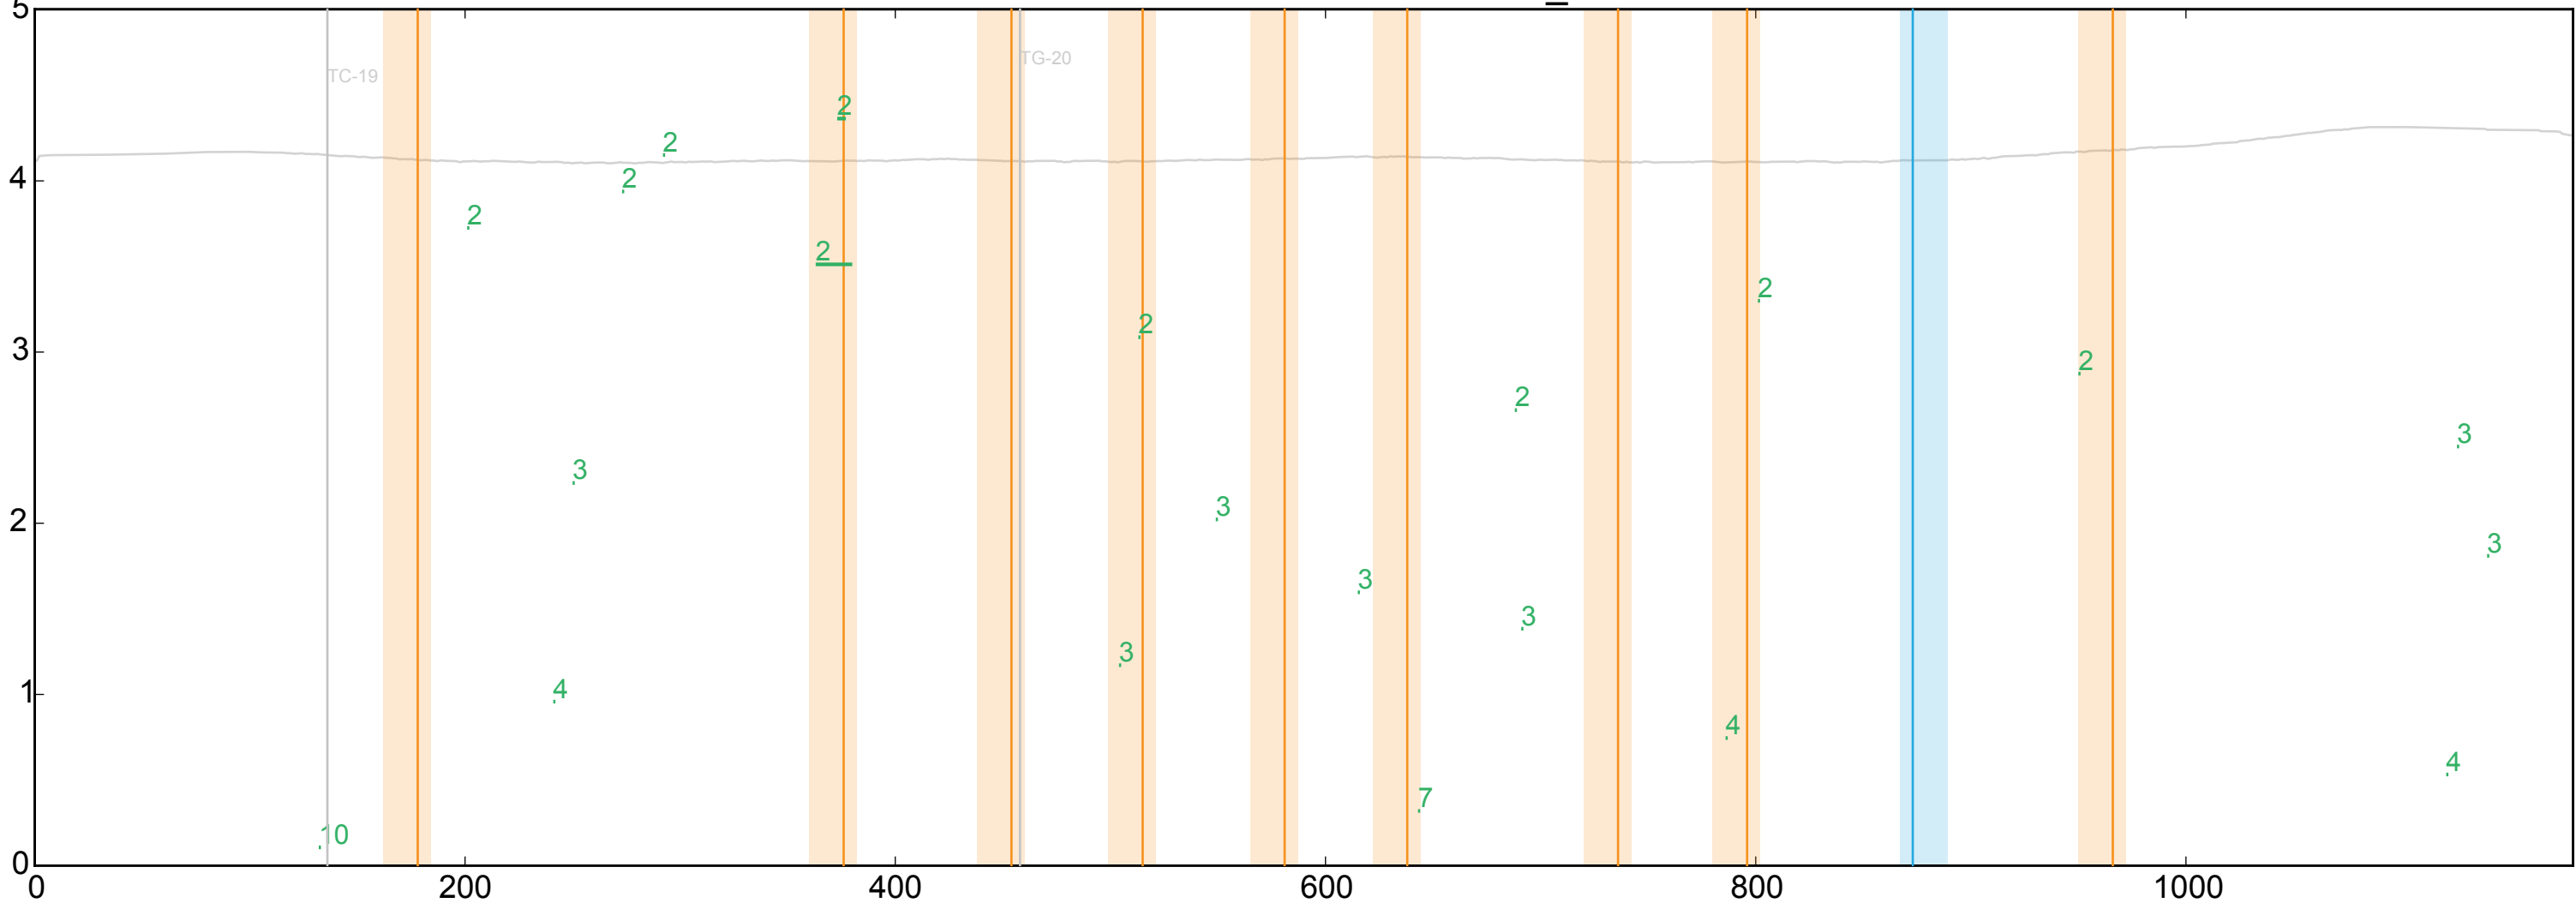

Mutant ENSDARG00000052232\_0

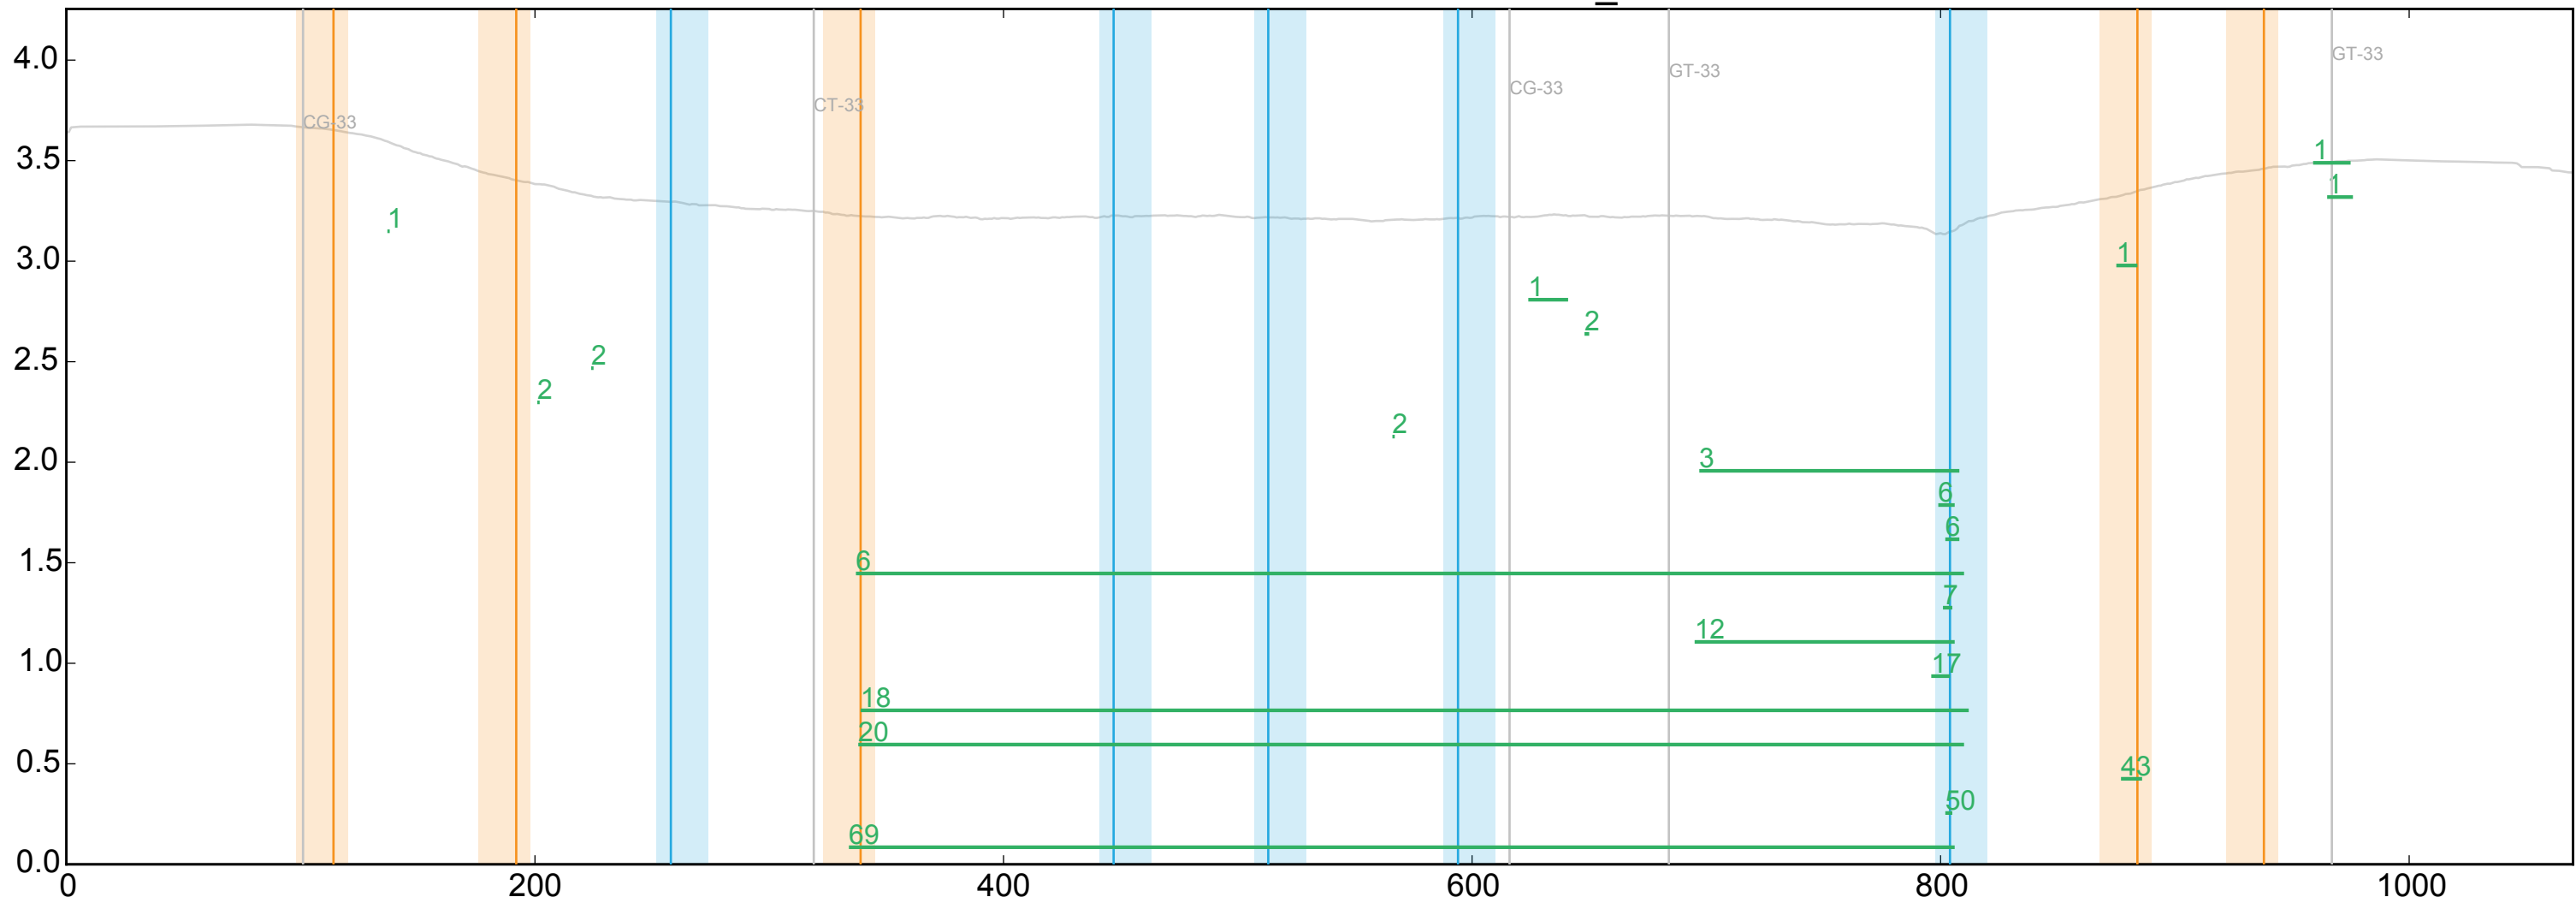

WT ENSDARG00000052232\_0

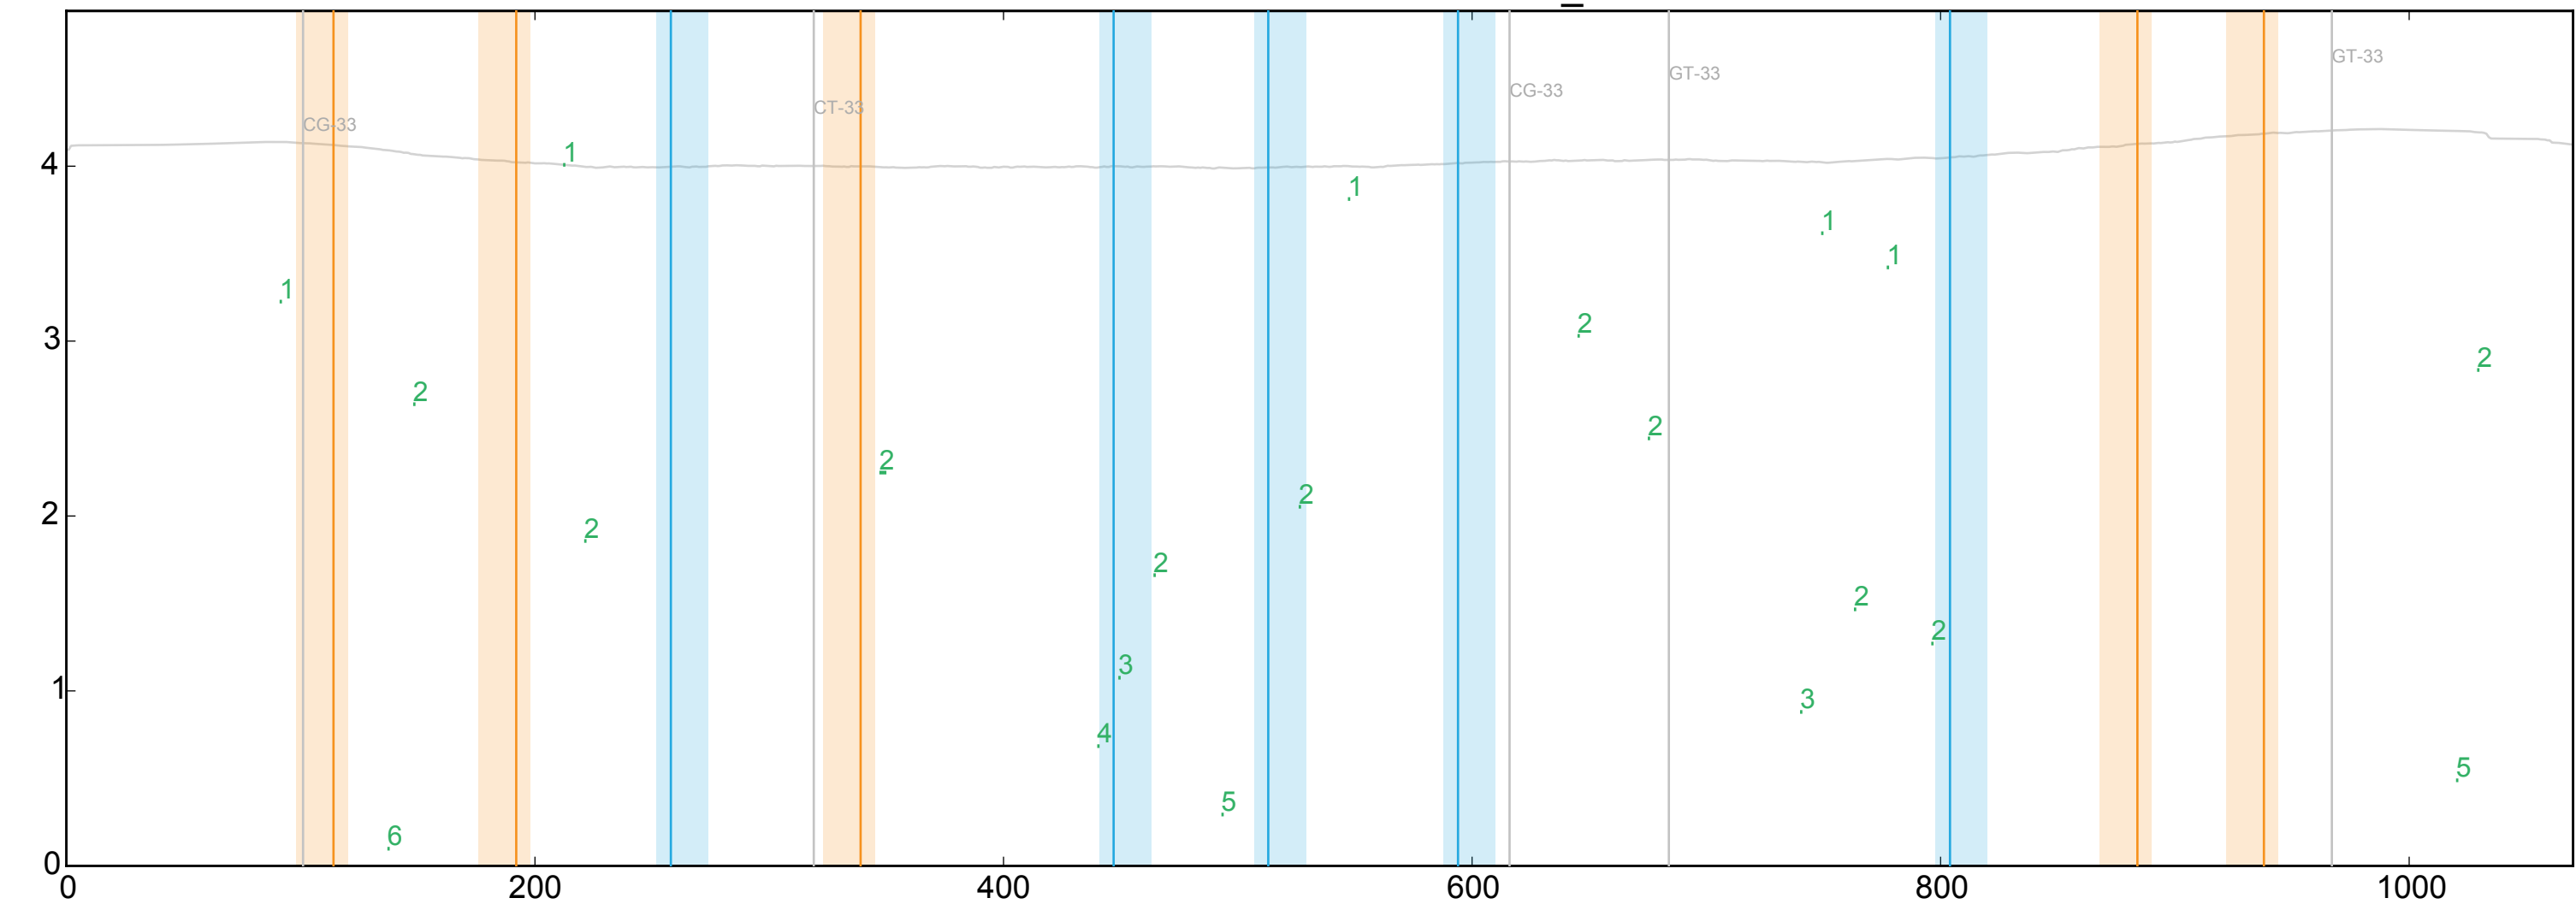



Mutant ENSDARG00000074739\_1

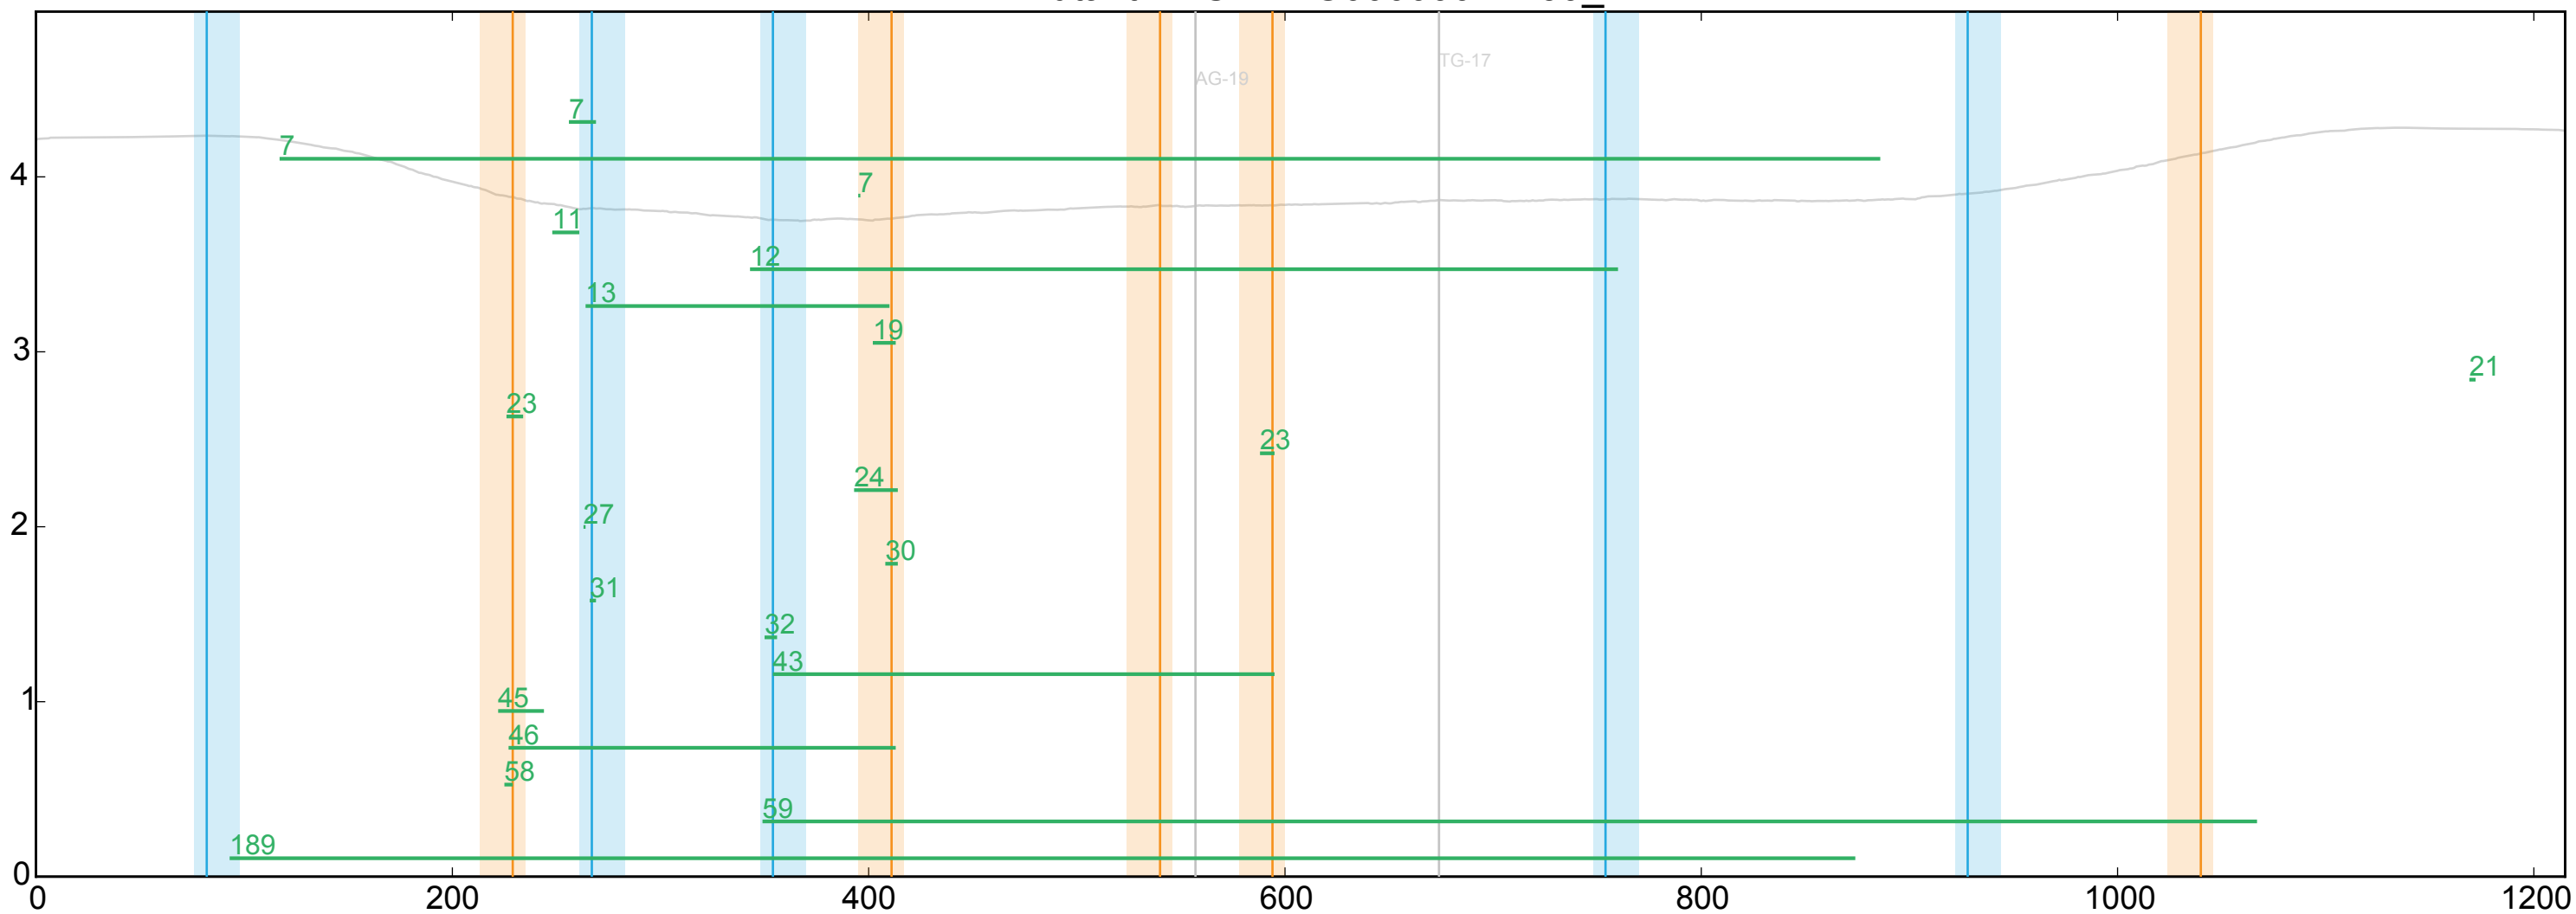

WT ENSDARG00000074739\_1

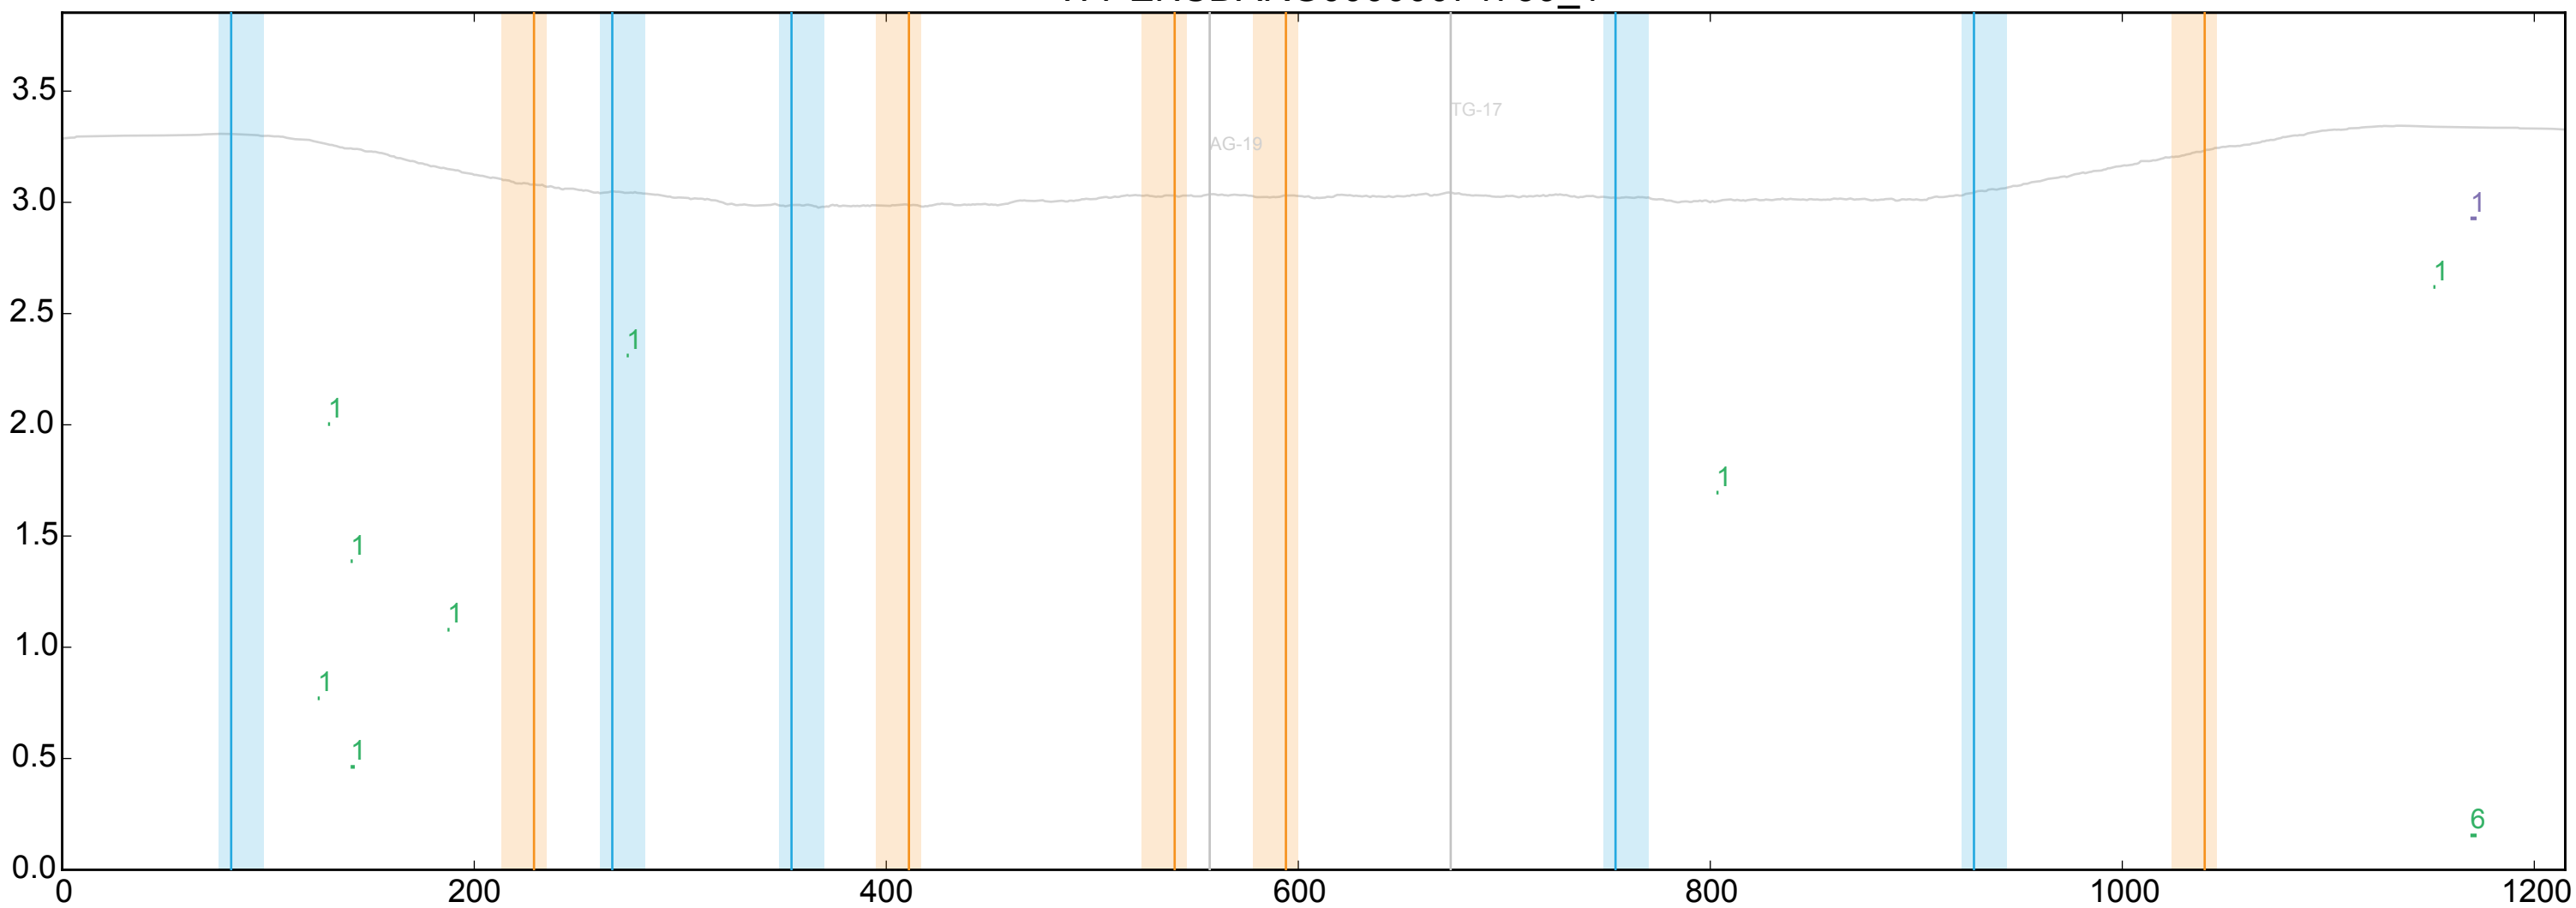



Mutant ENSDARG00000037421\_0

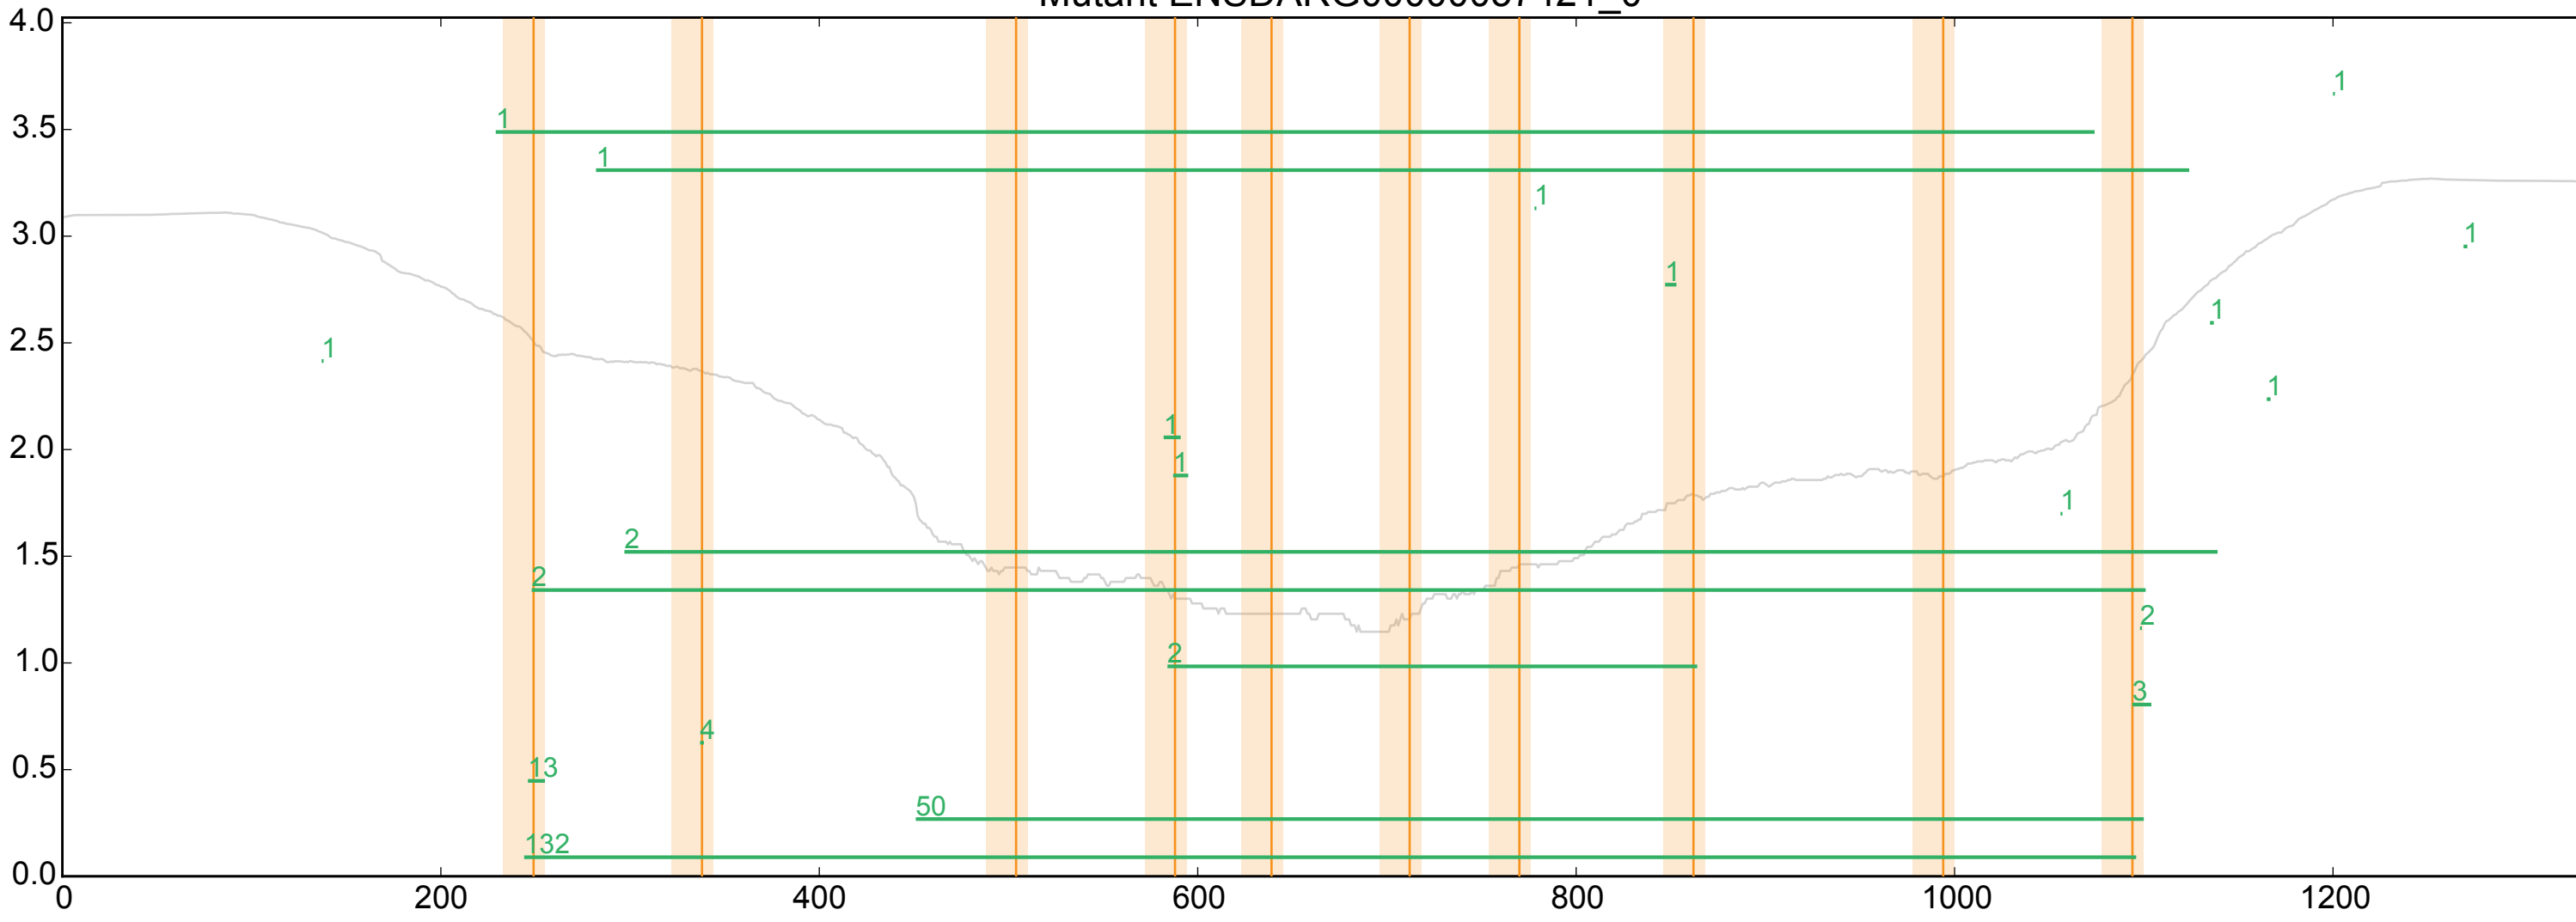

WT ENSDARG00000037421\_0

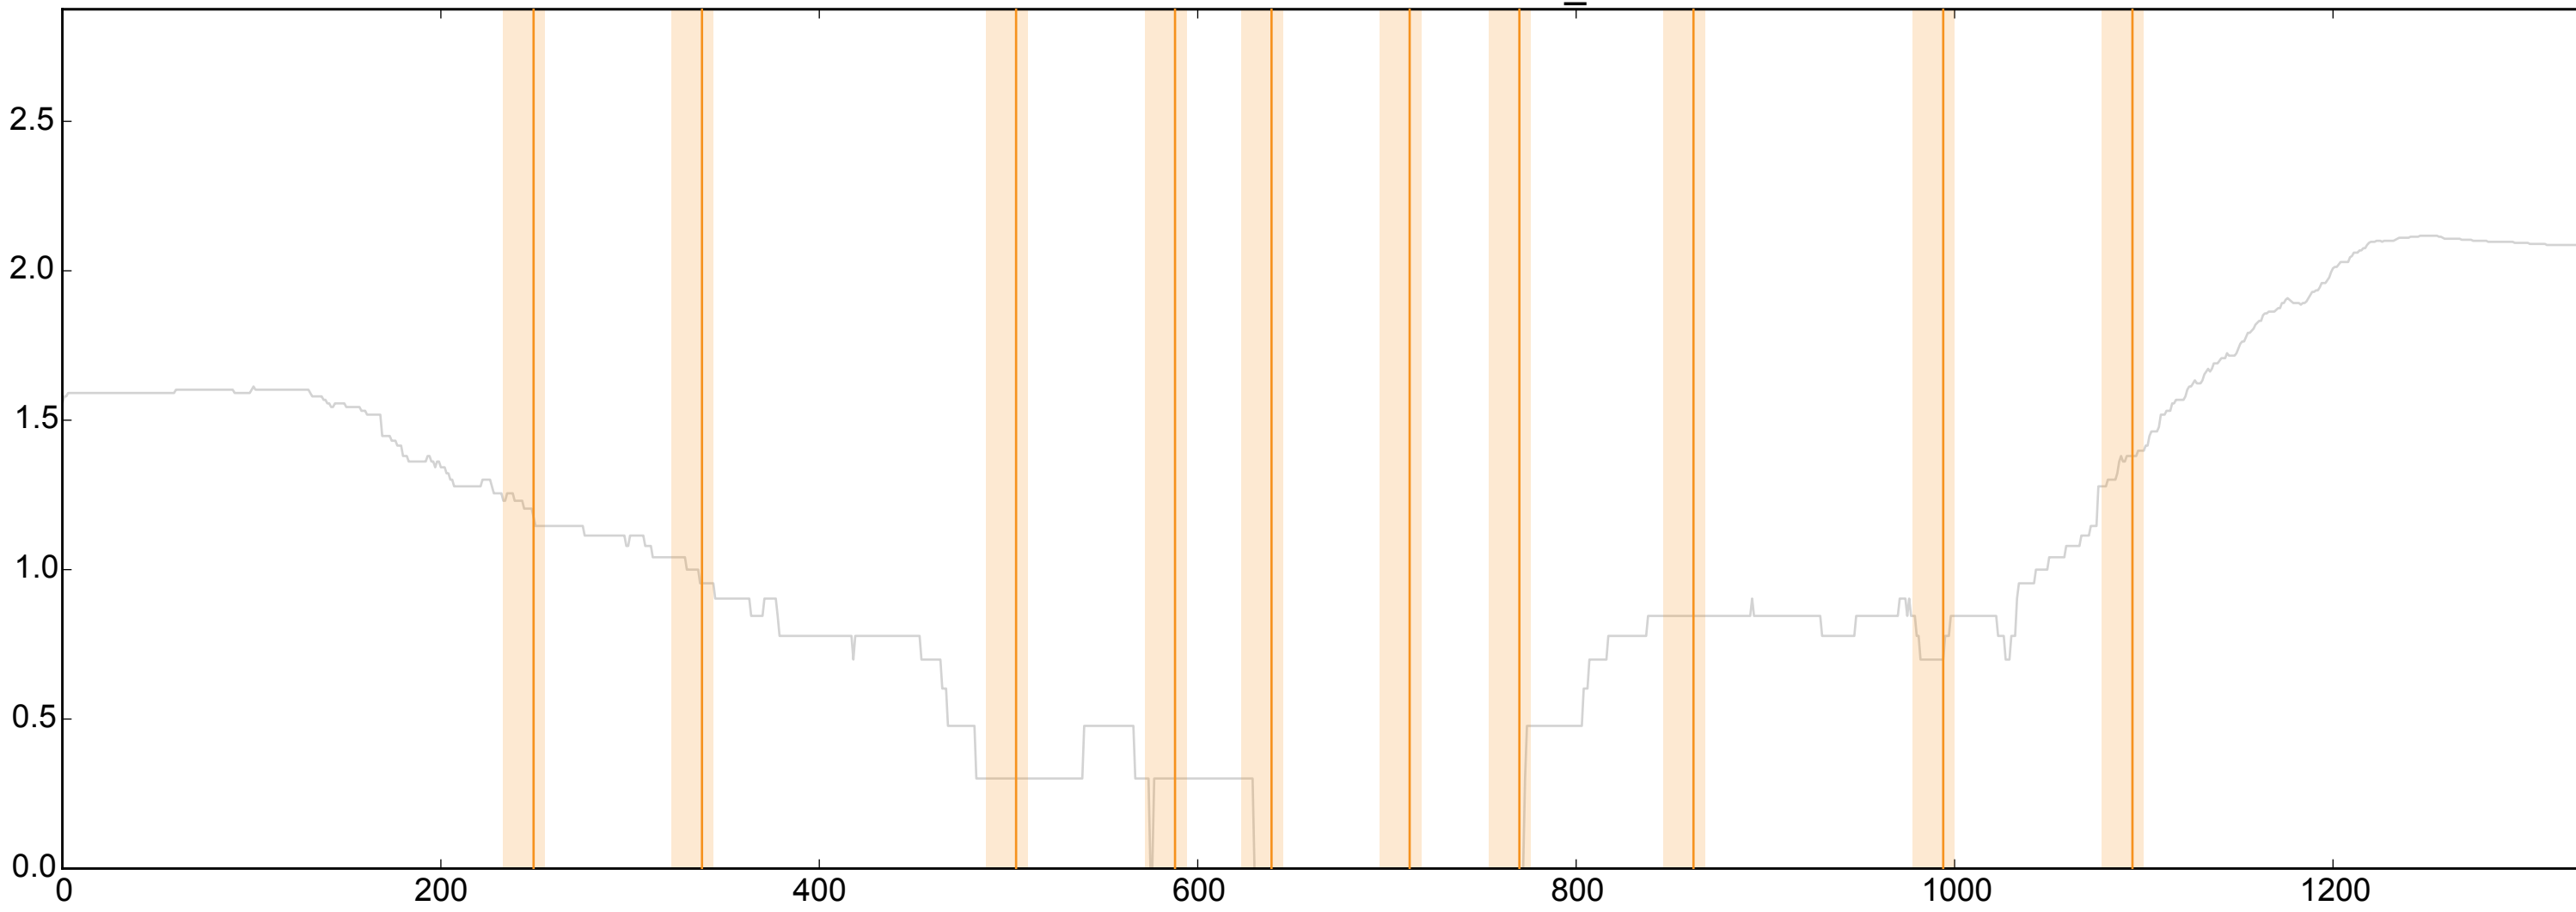

Mutant ENSDARG00000077860\_5

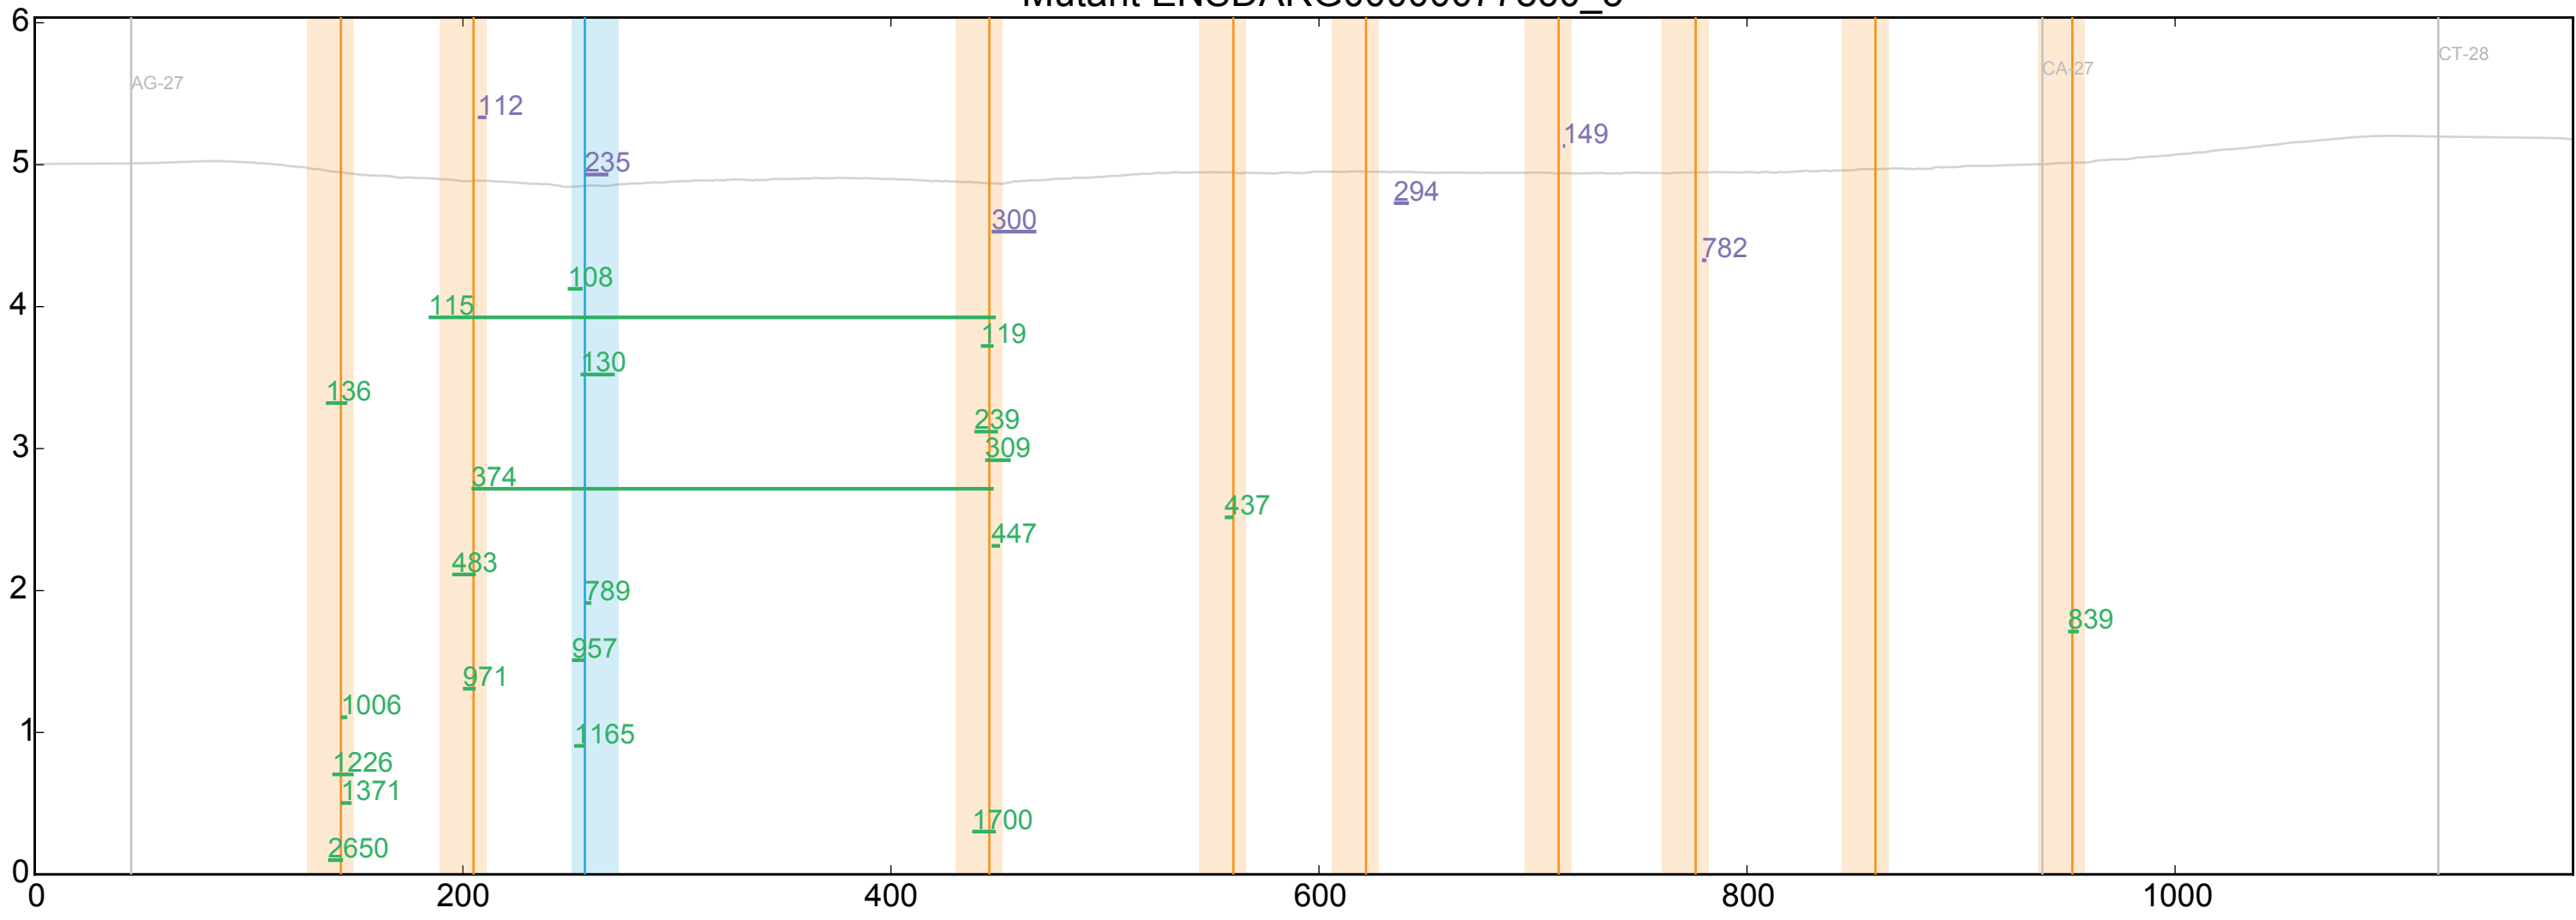

WT ENSDARG00000077860\_5

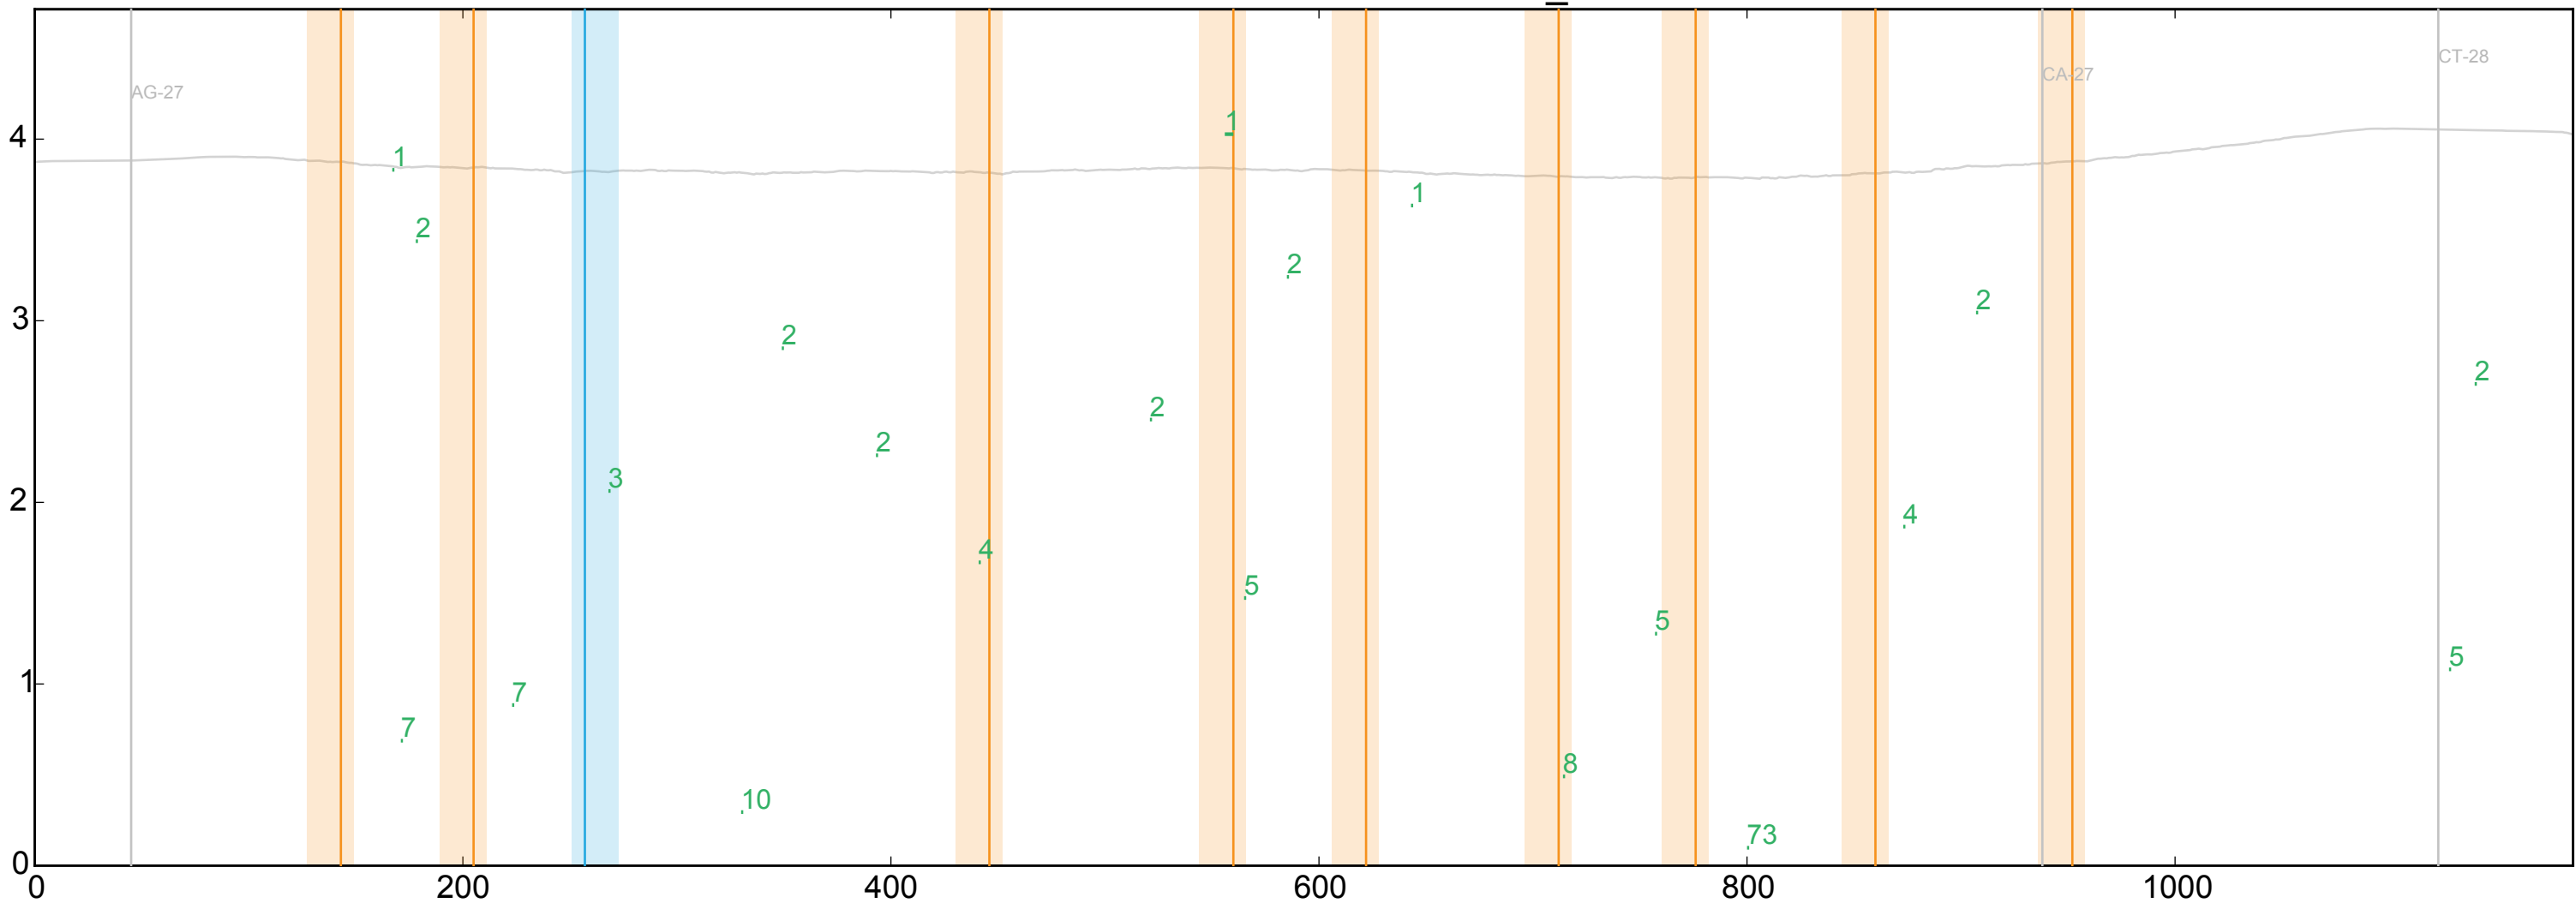

Mutant ENSDARG00000079656\_0

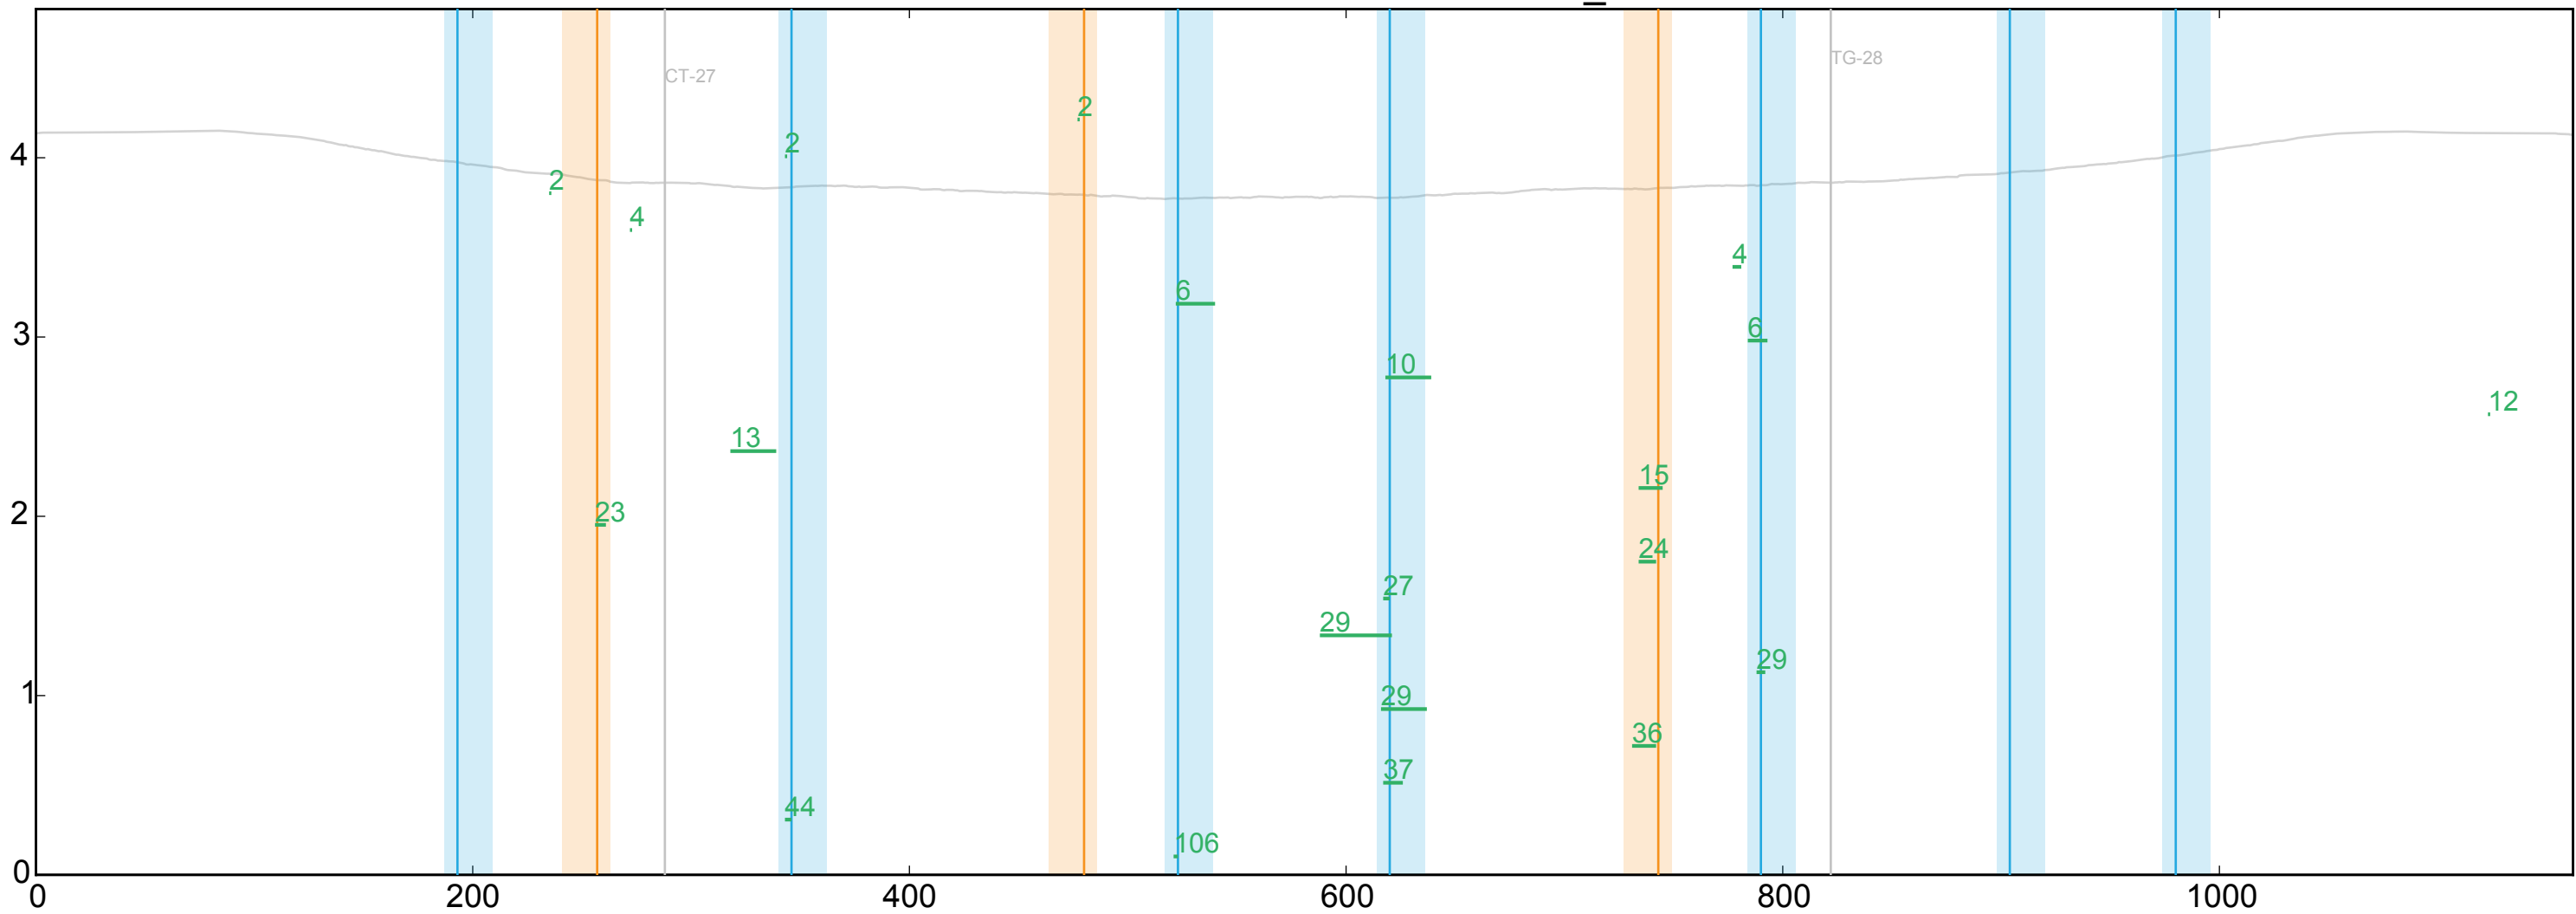

WT ENSDARG00000079656\_0

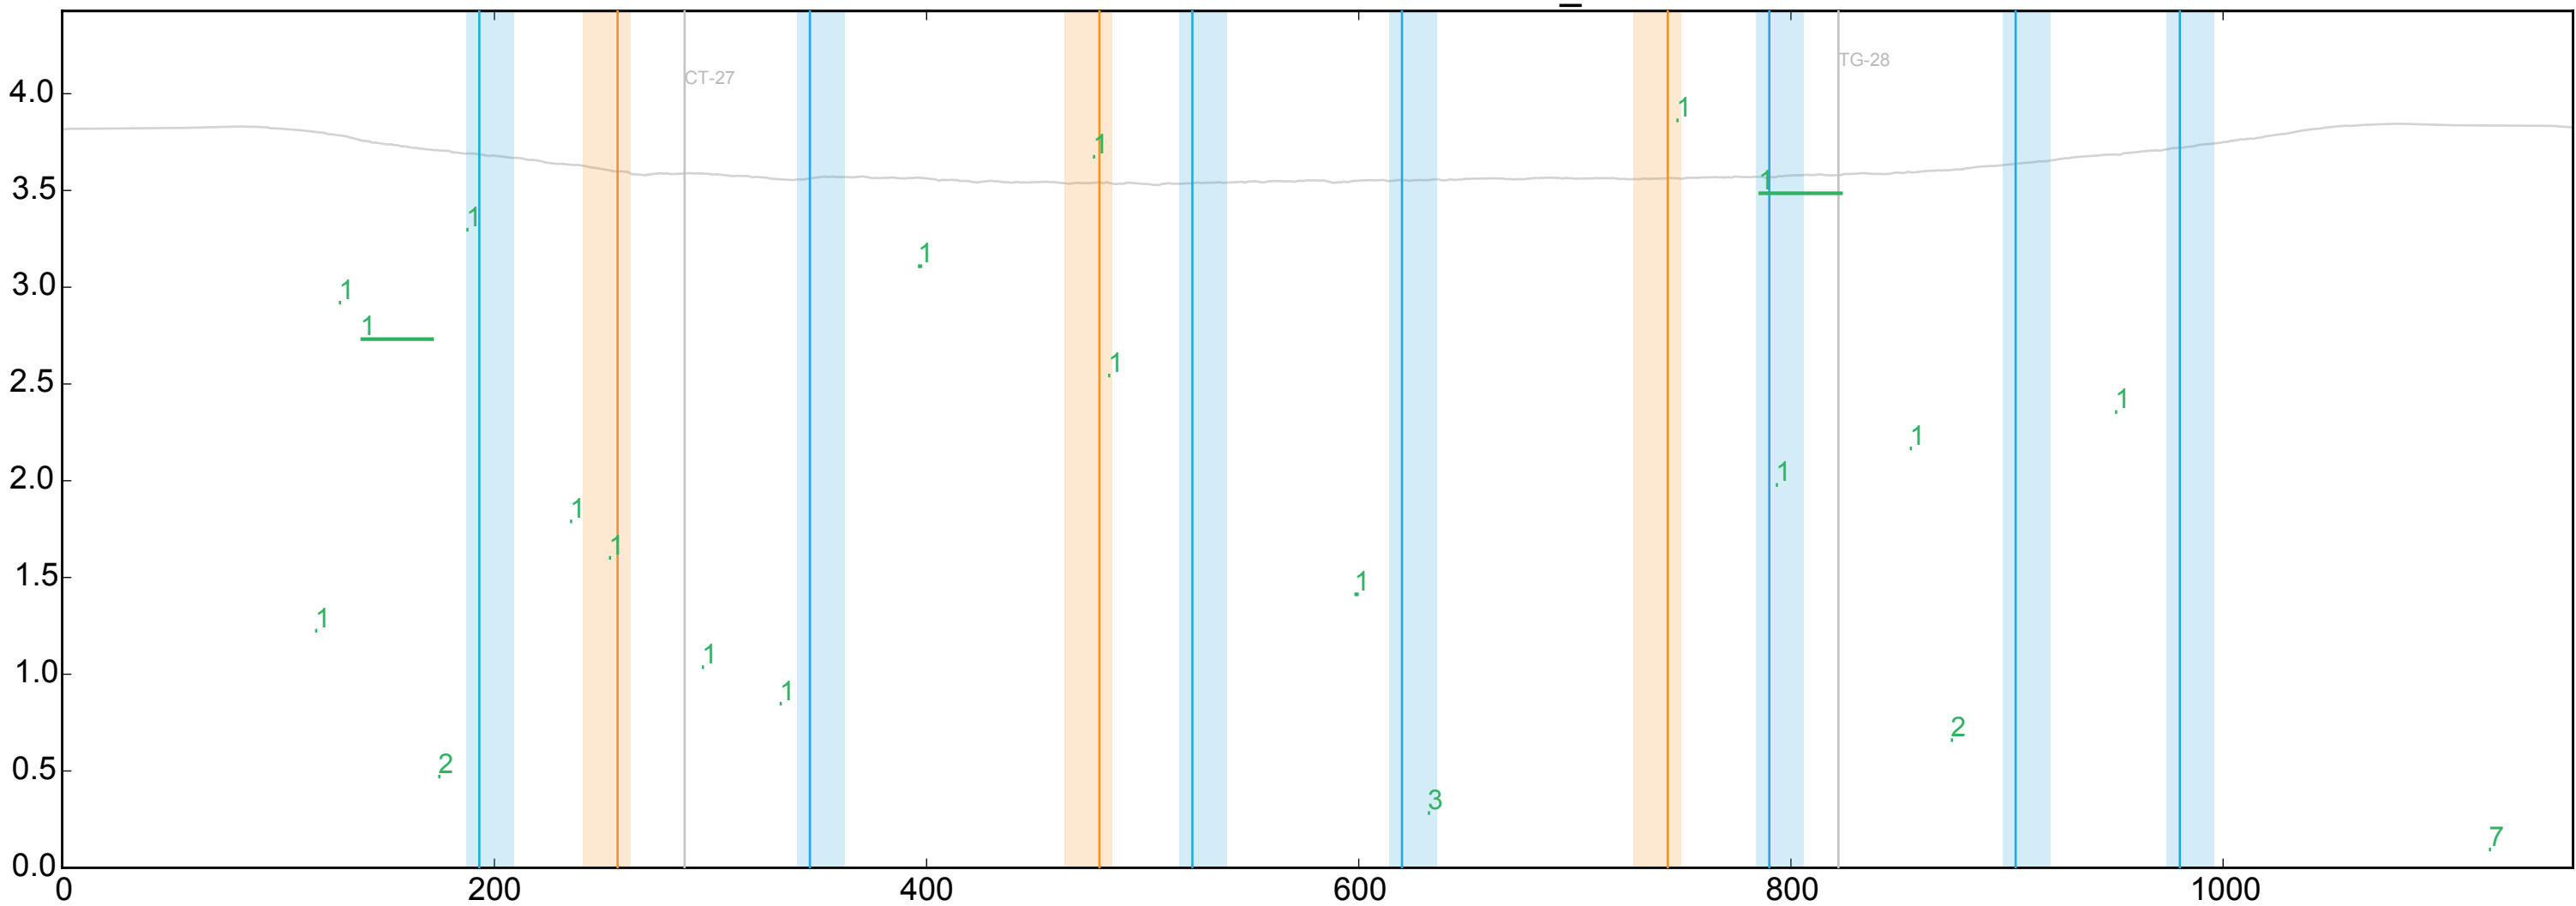



Mutant ENSDARG00000062976\_8

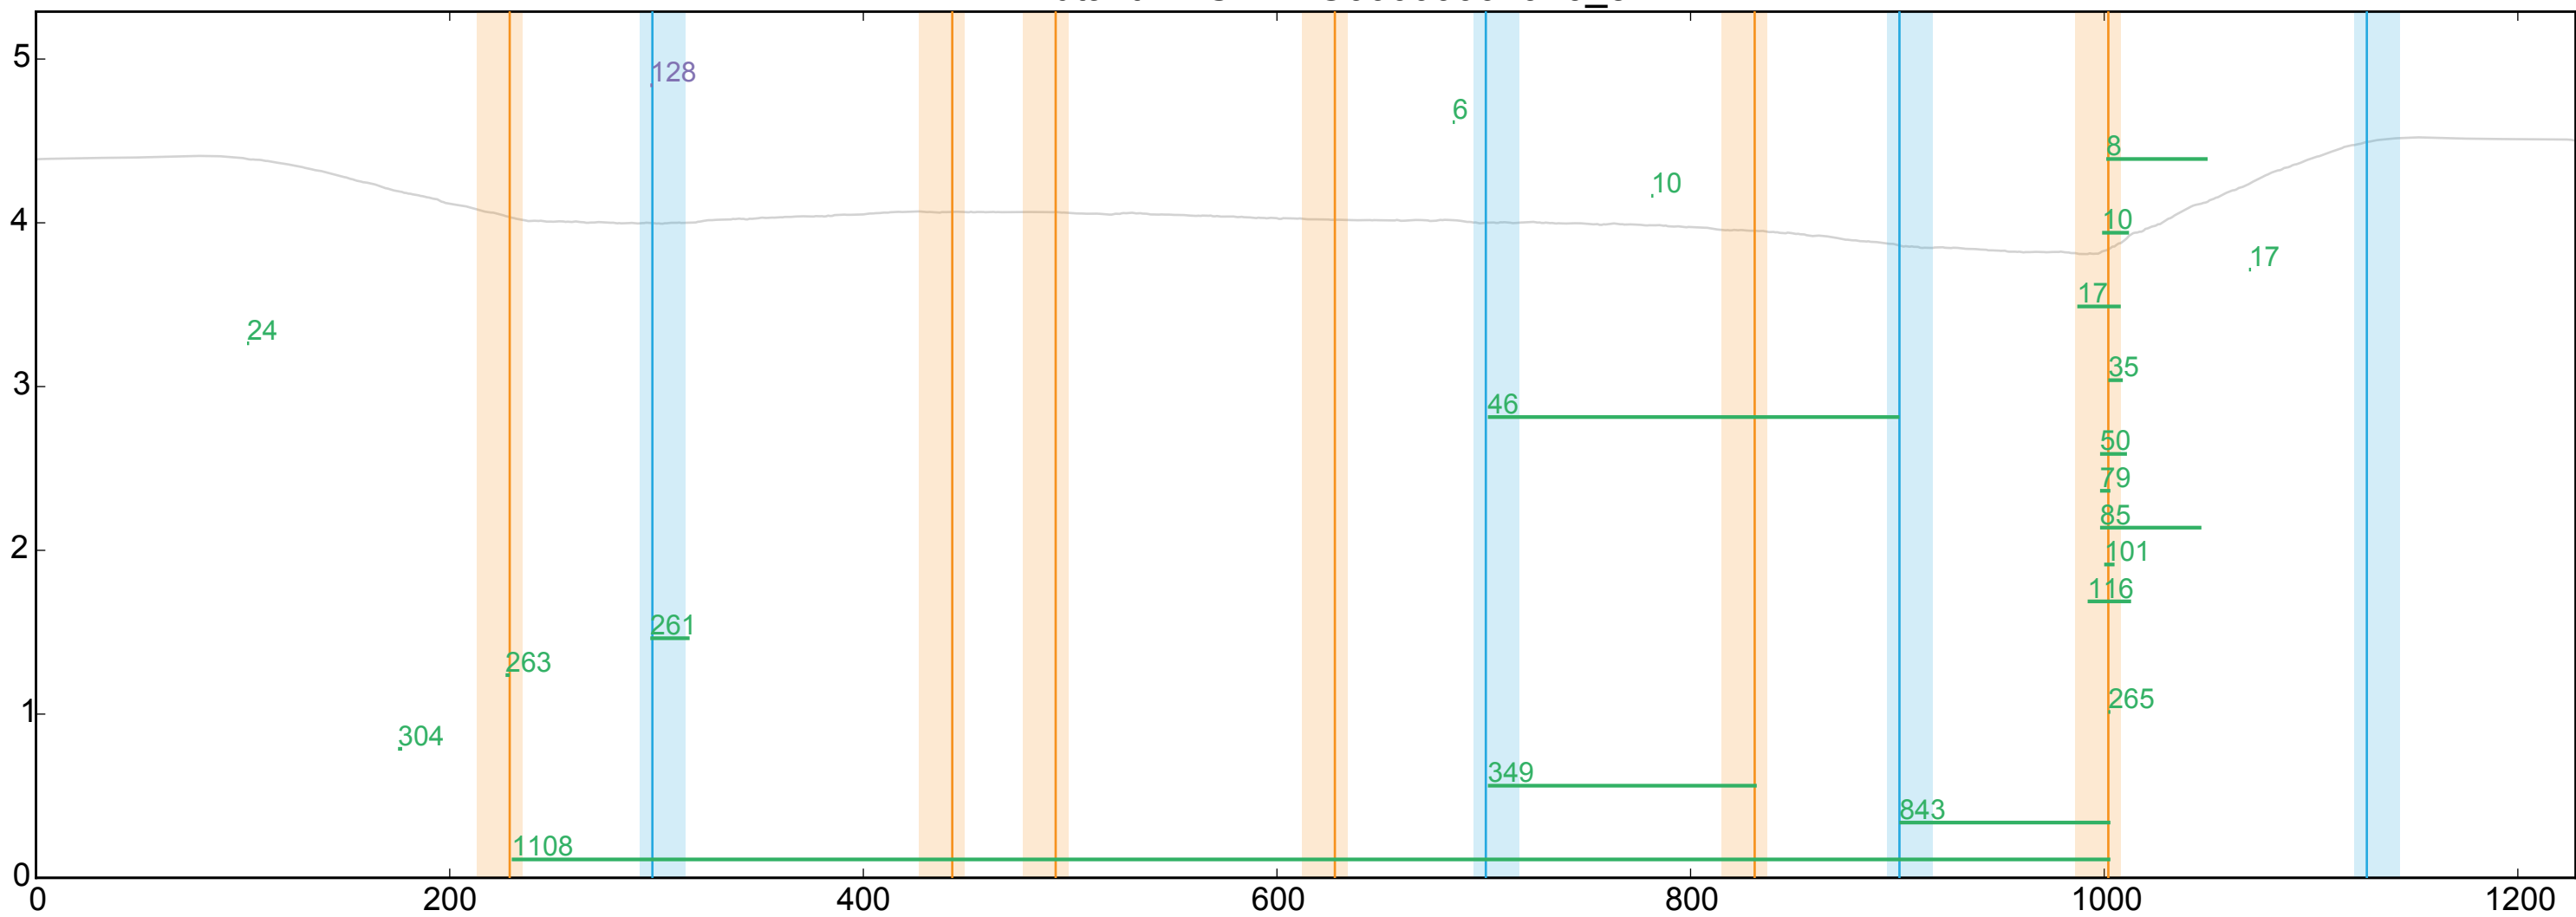

WT ENSDARG00000062976\_8

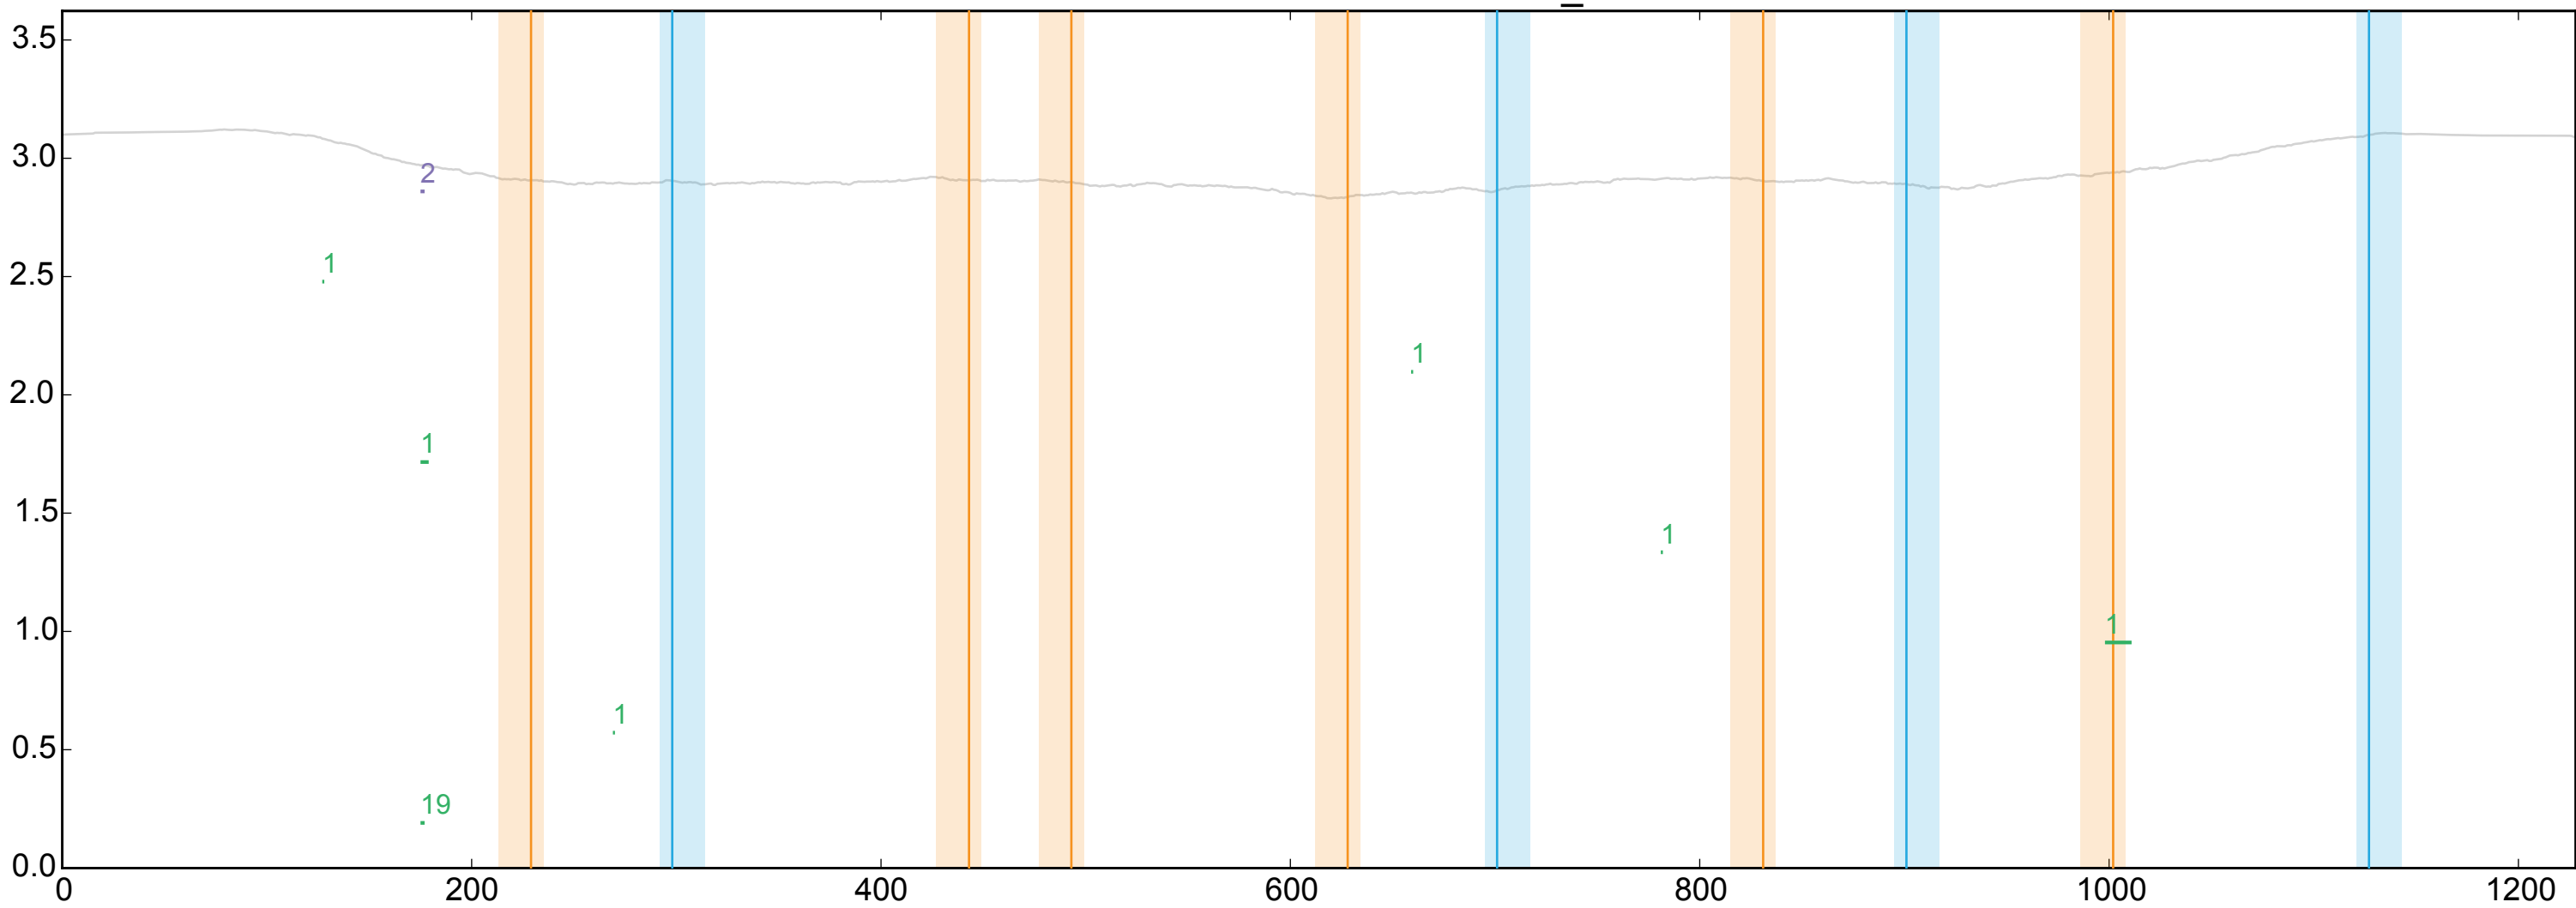

Mutant ENSDARG00000056836\_1

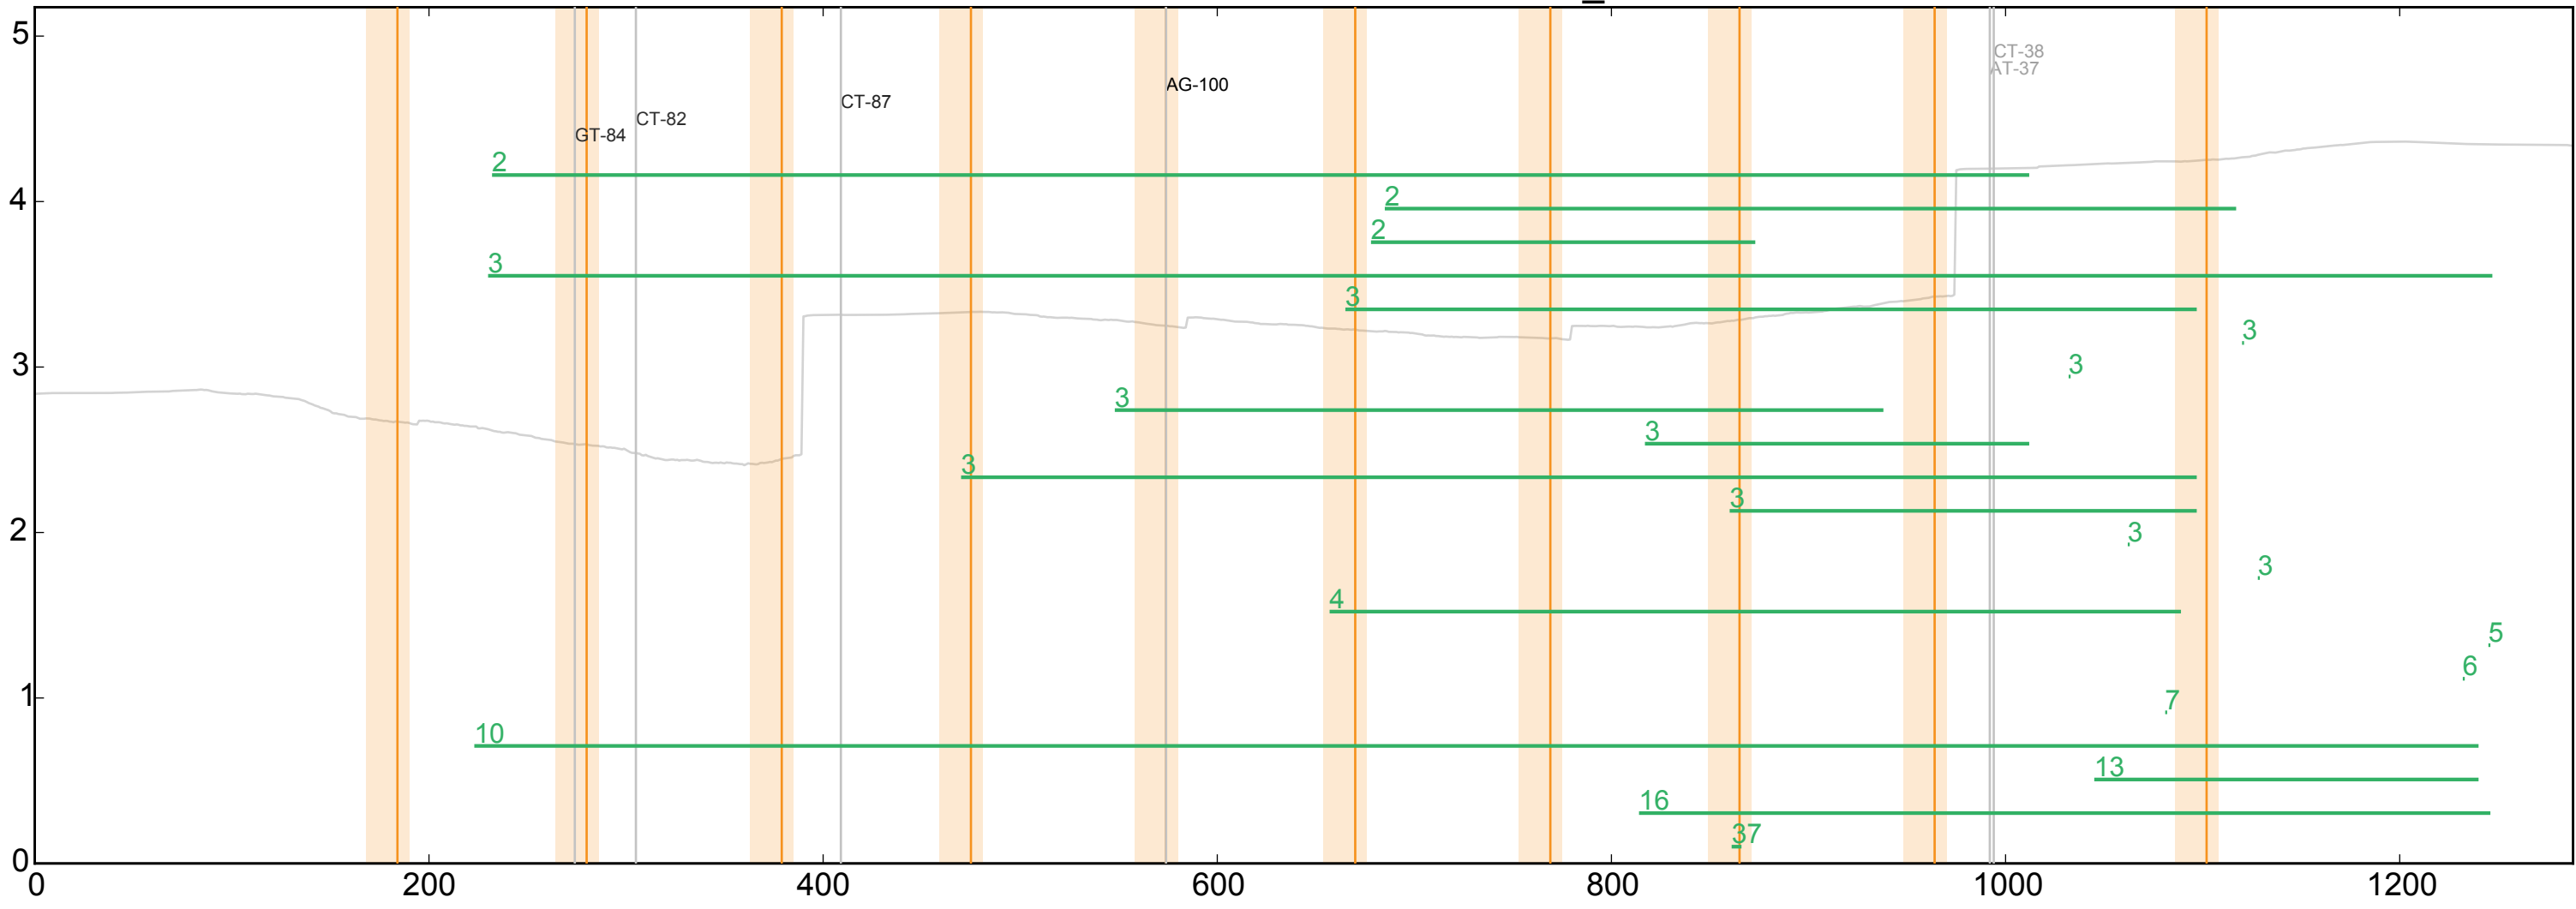

WT ENSDARG00000056836\_1

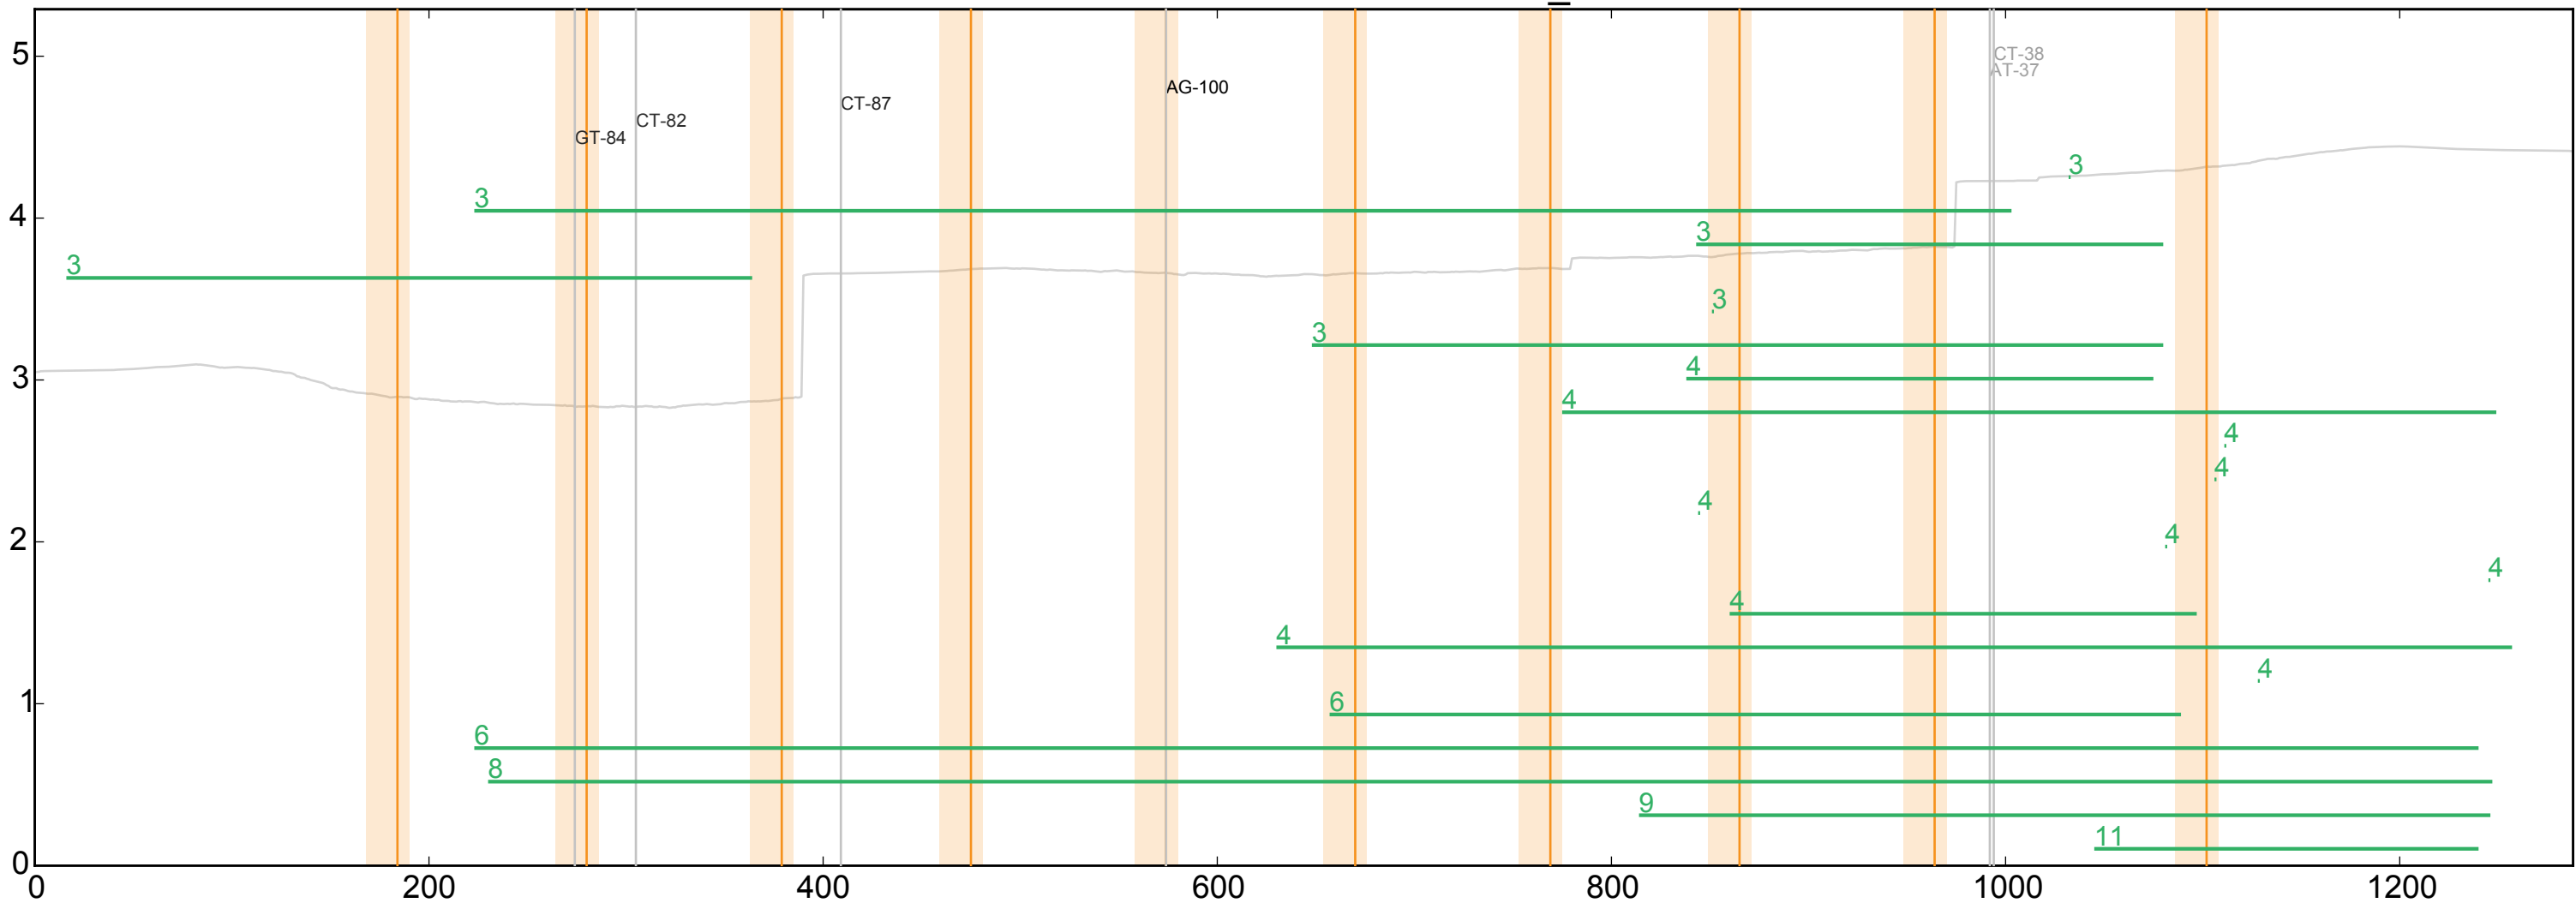

Mutant ENSDARG00000070029\_0

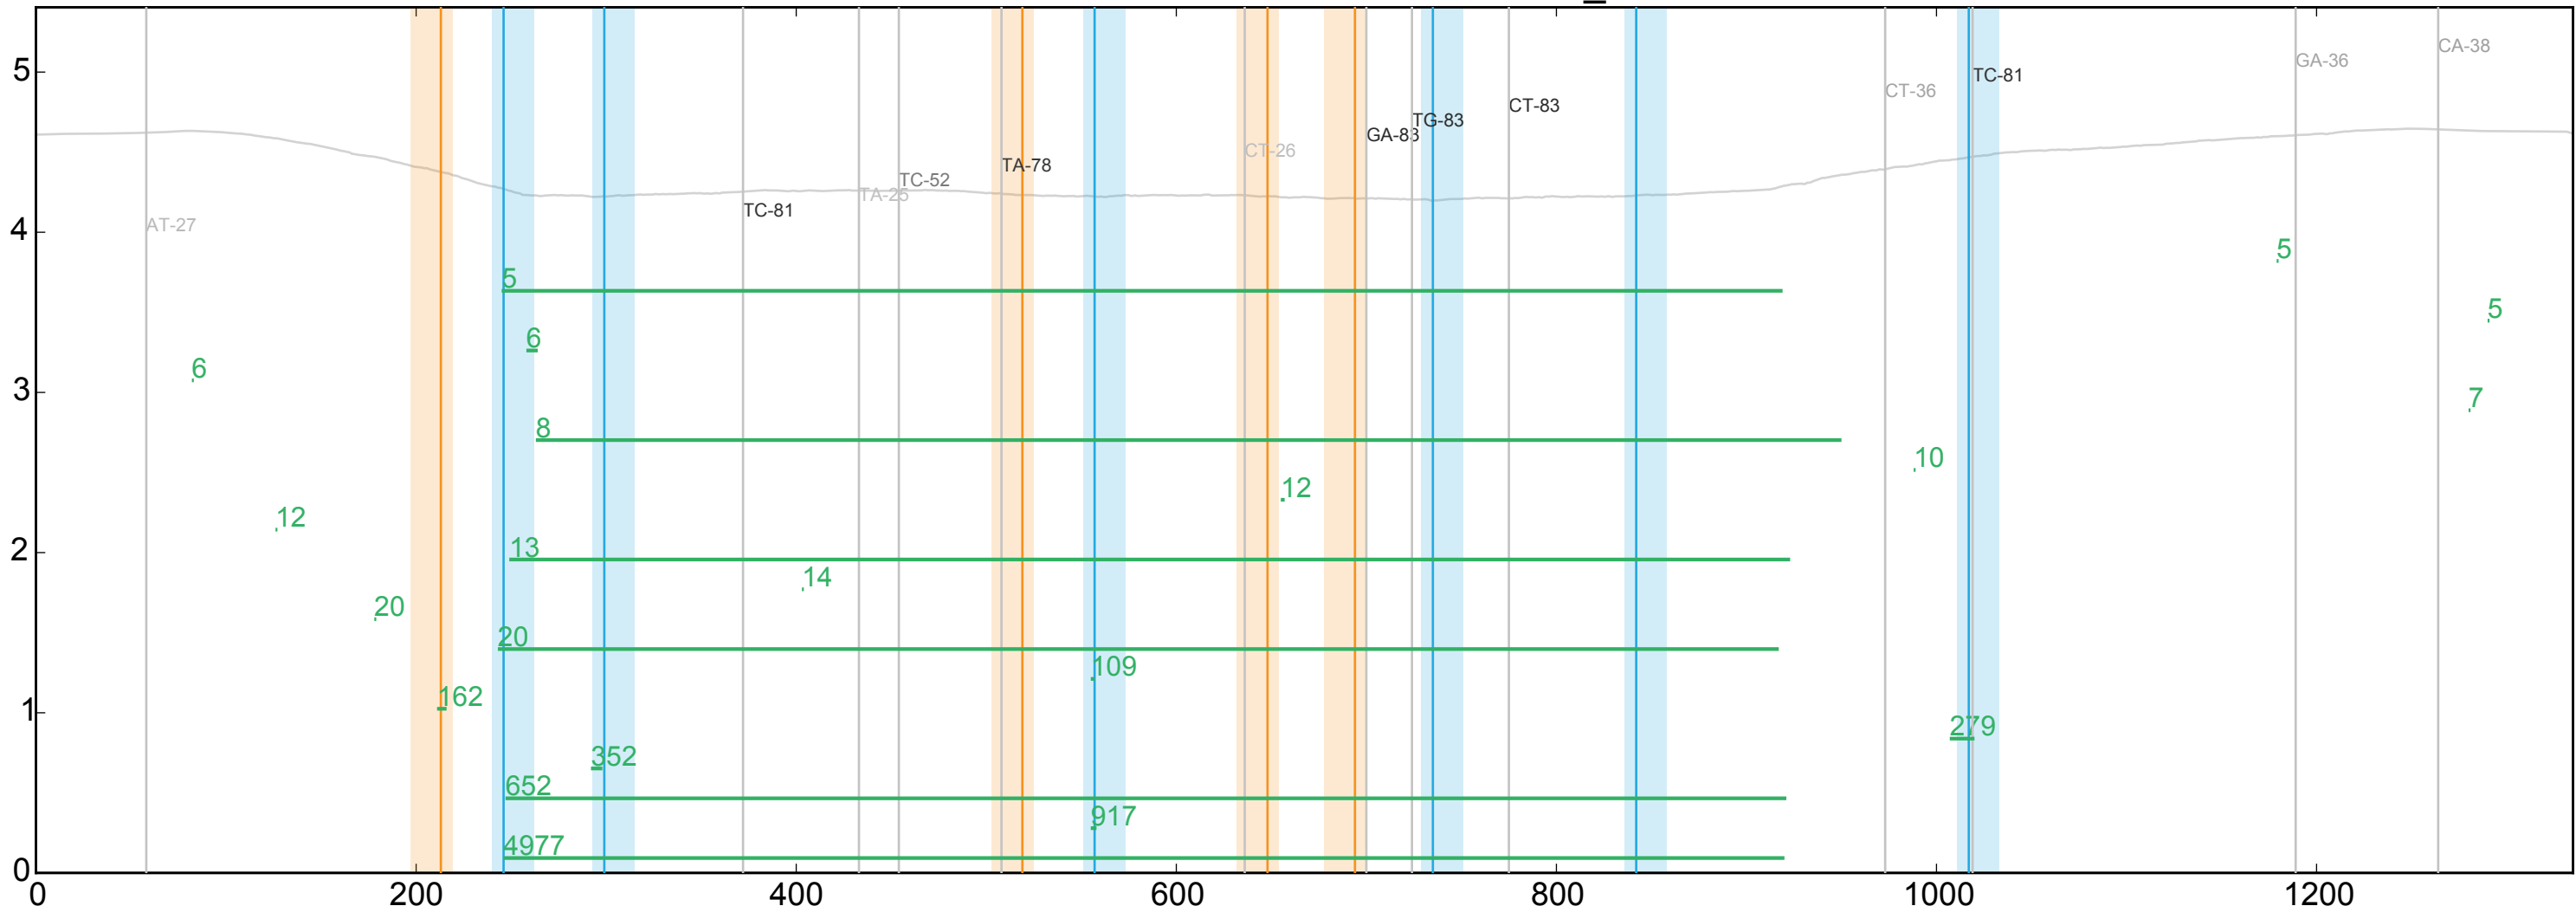

WT ENSDARG00000070029\_0

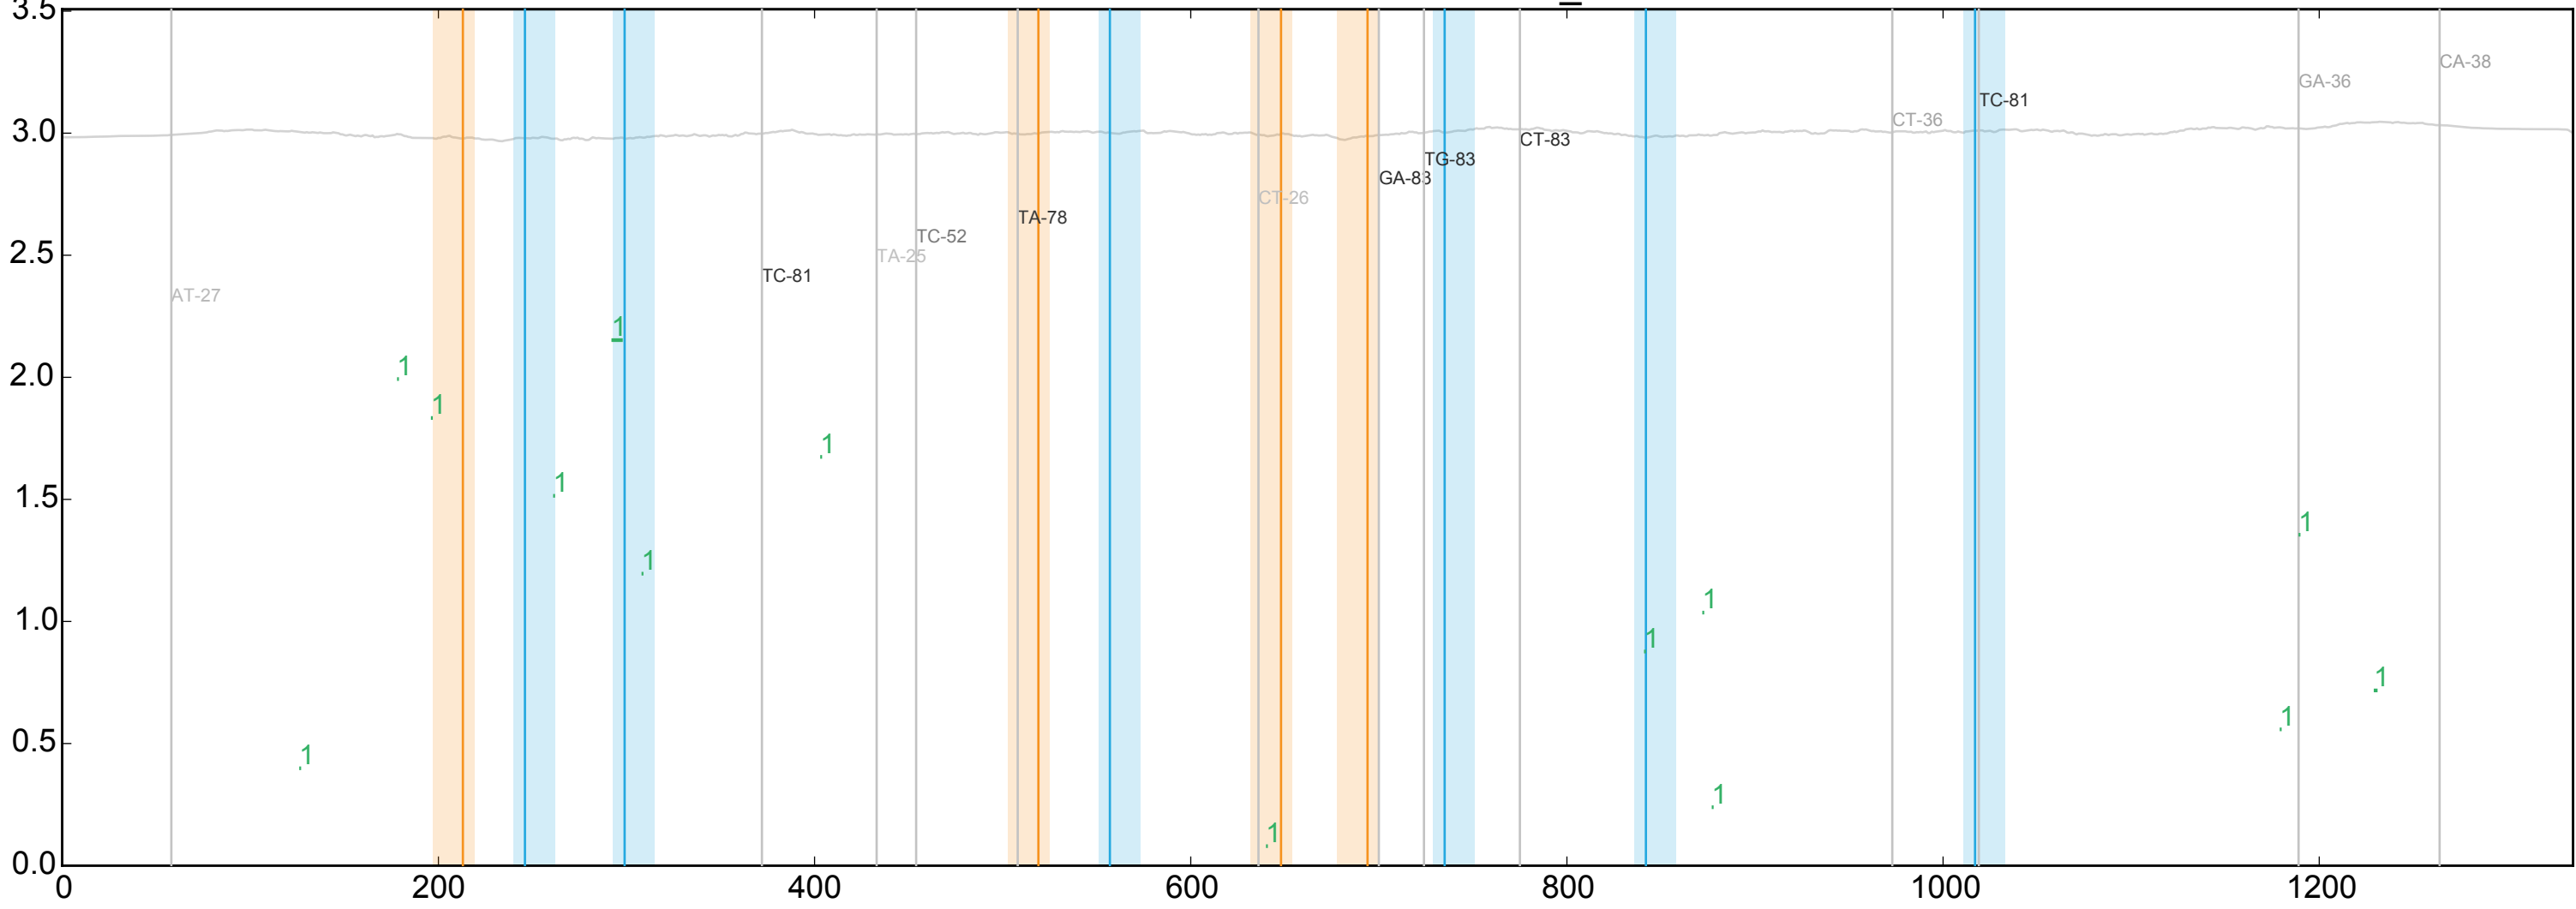

Mutant ENSDARG00000016871\_6

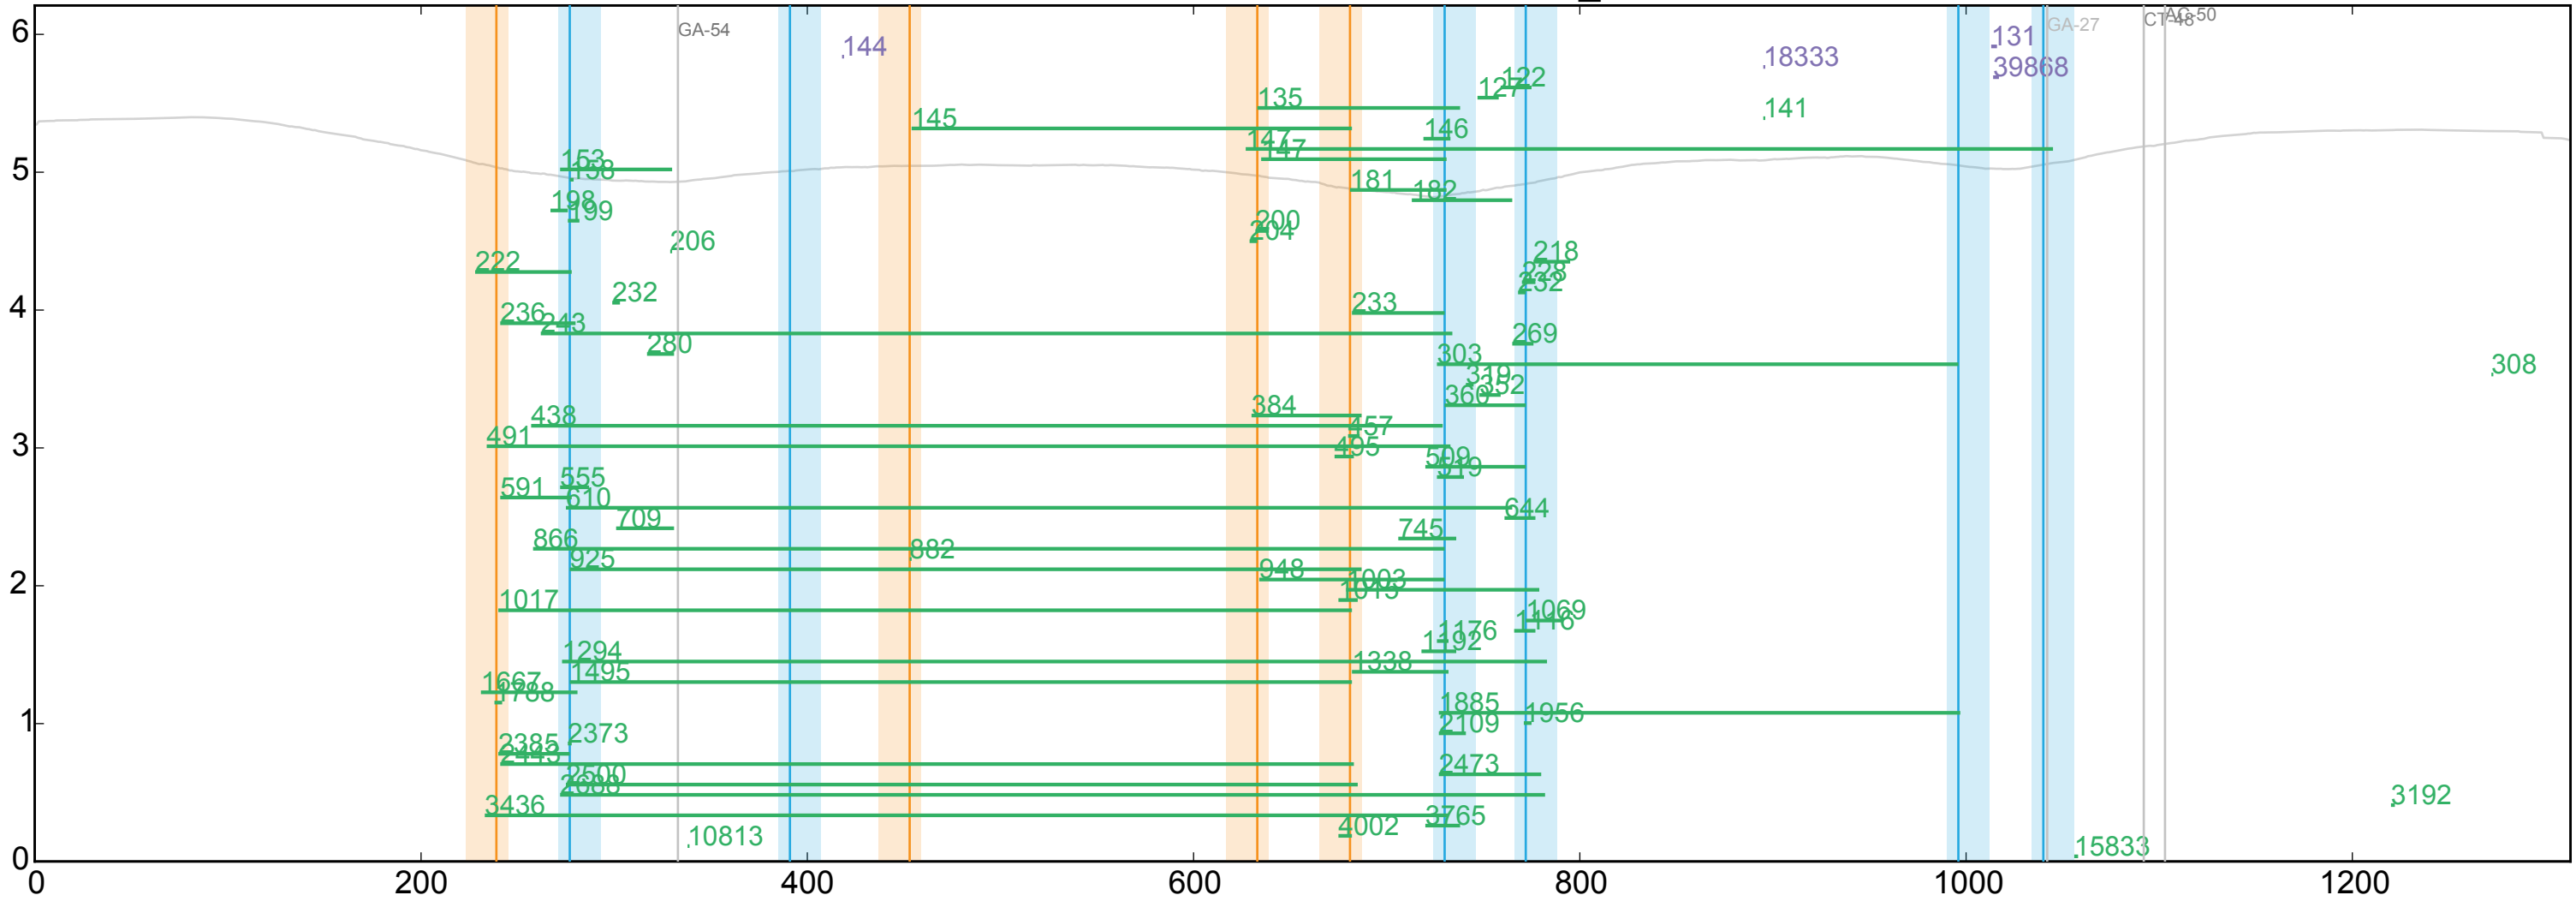

WT ENSDARG00000016871\_6

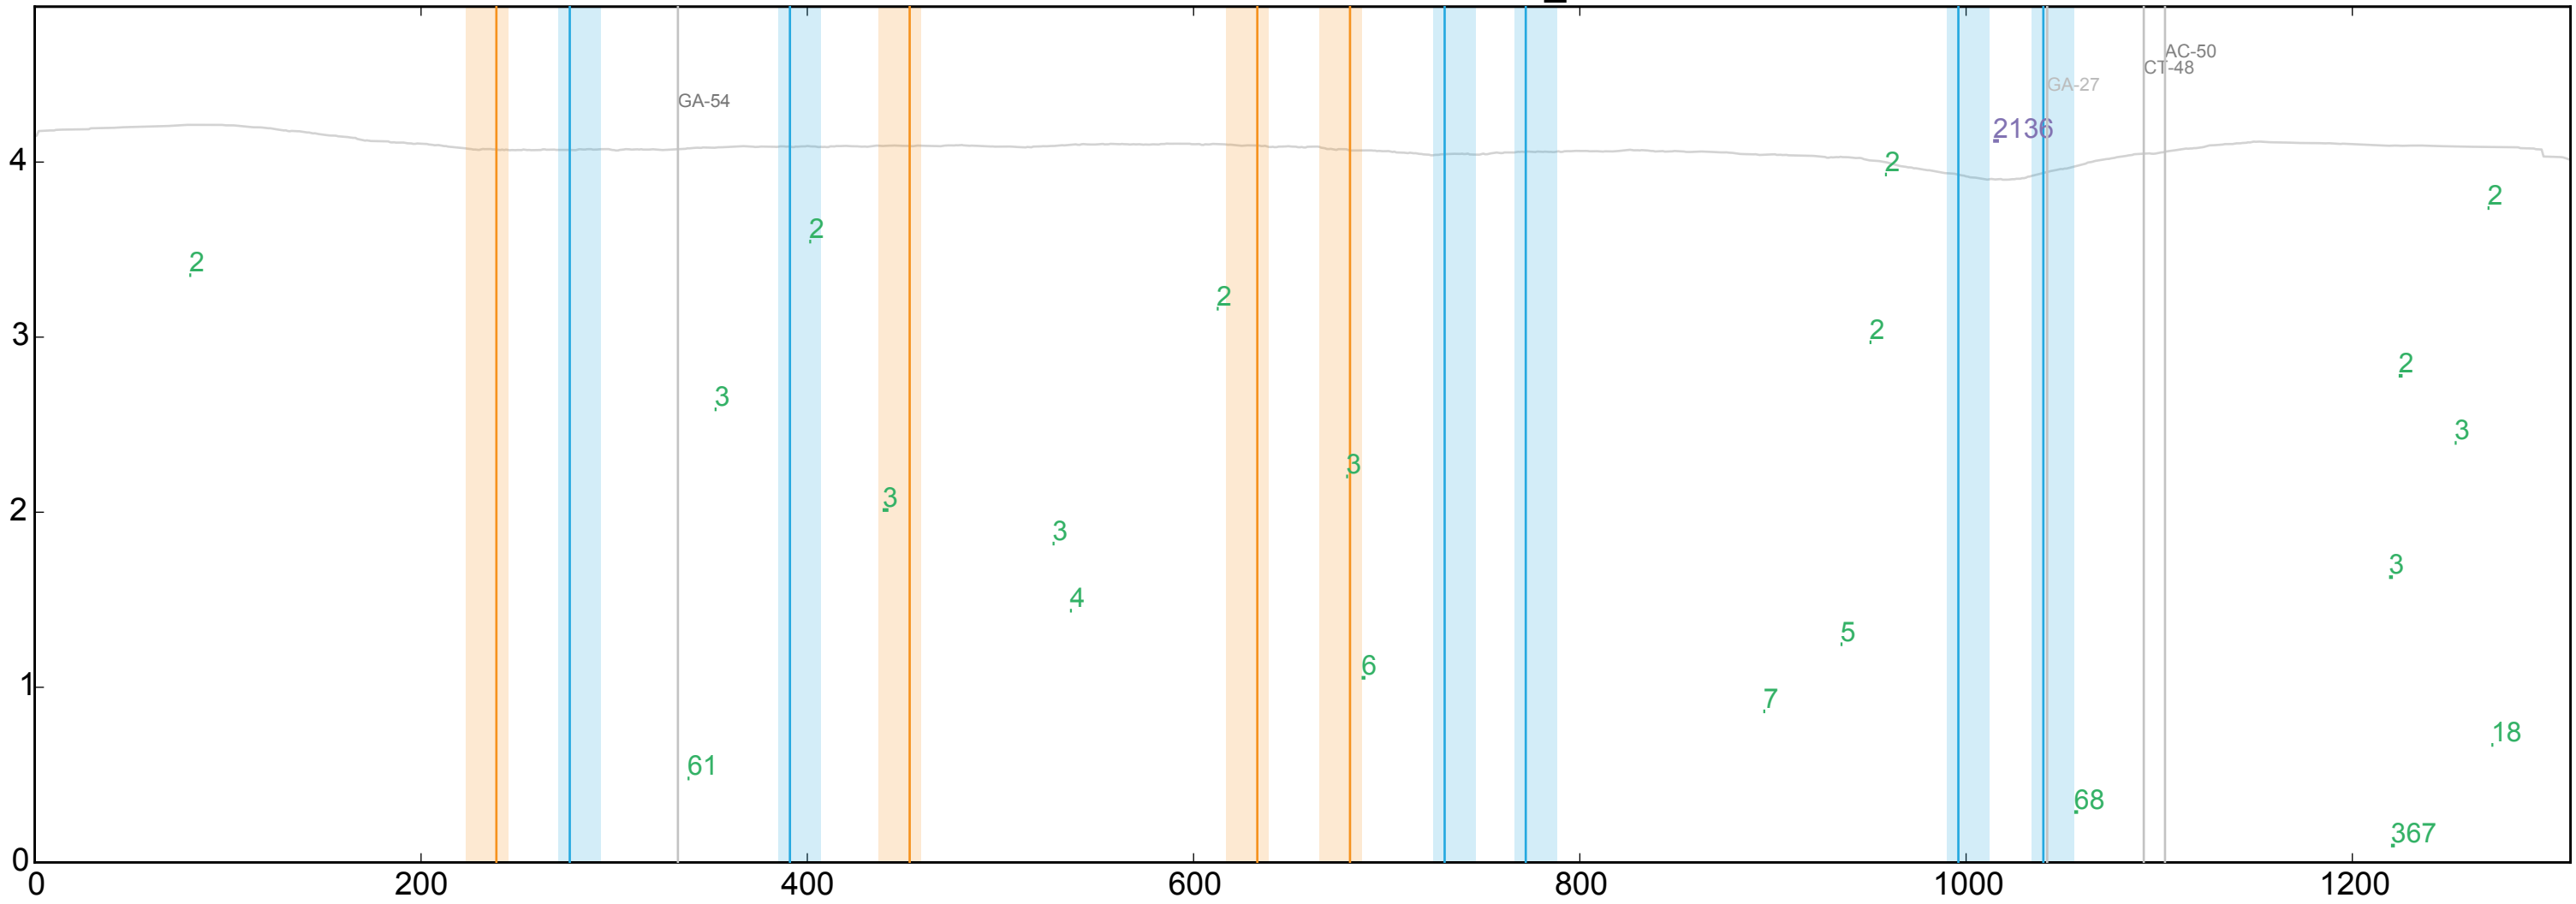

Mutant ENSDARG00000063258\_0

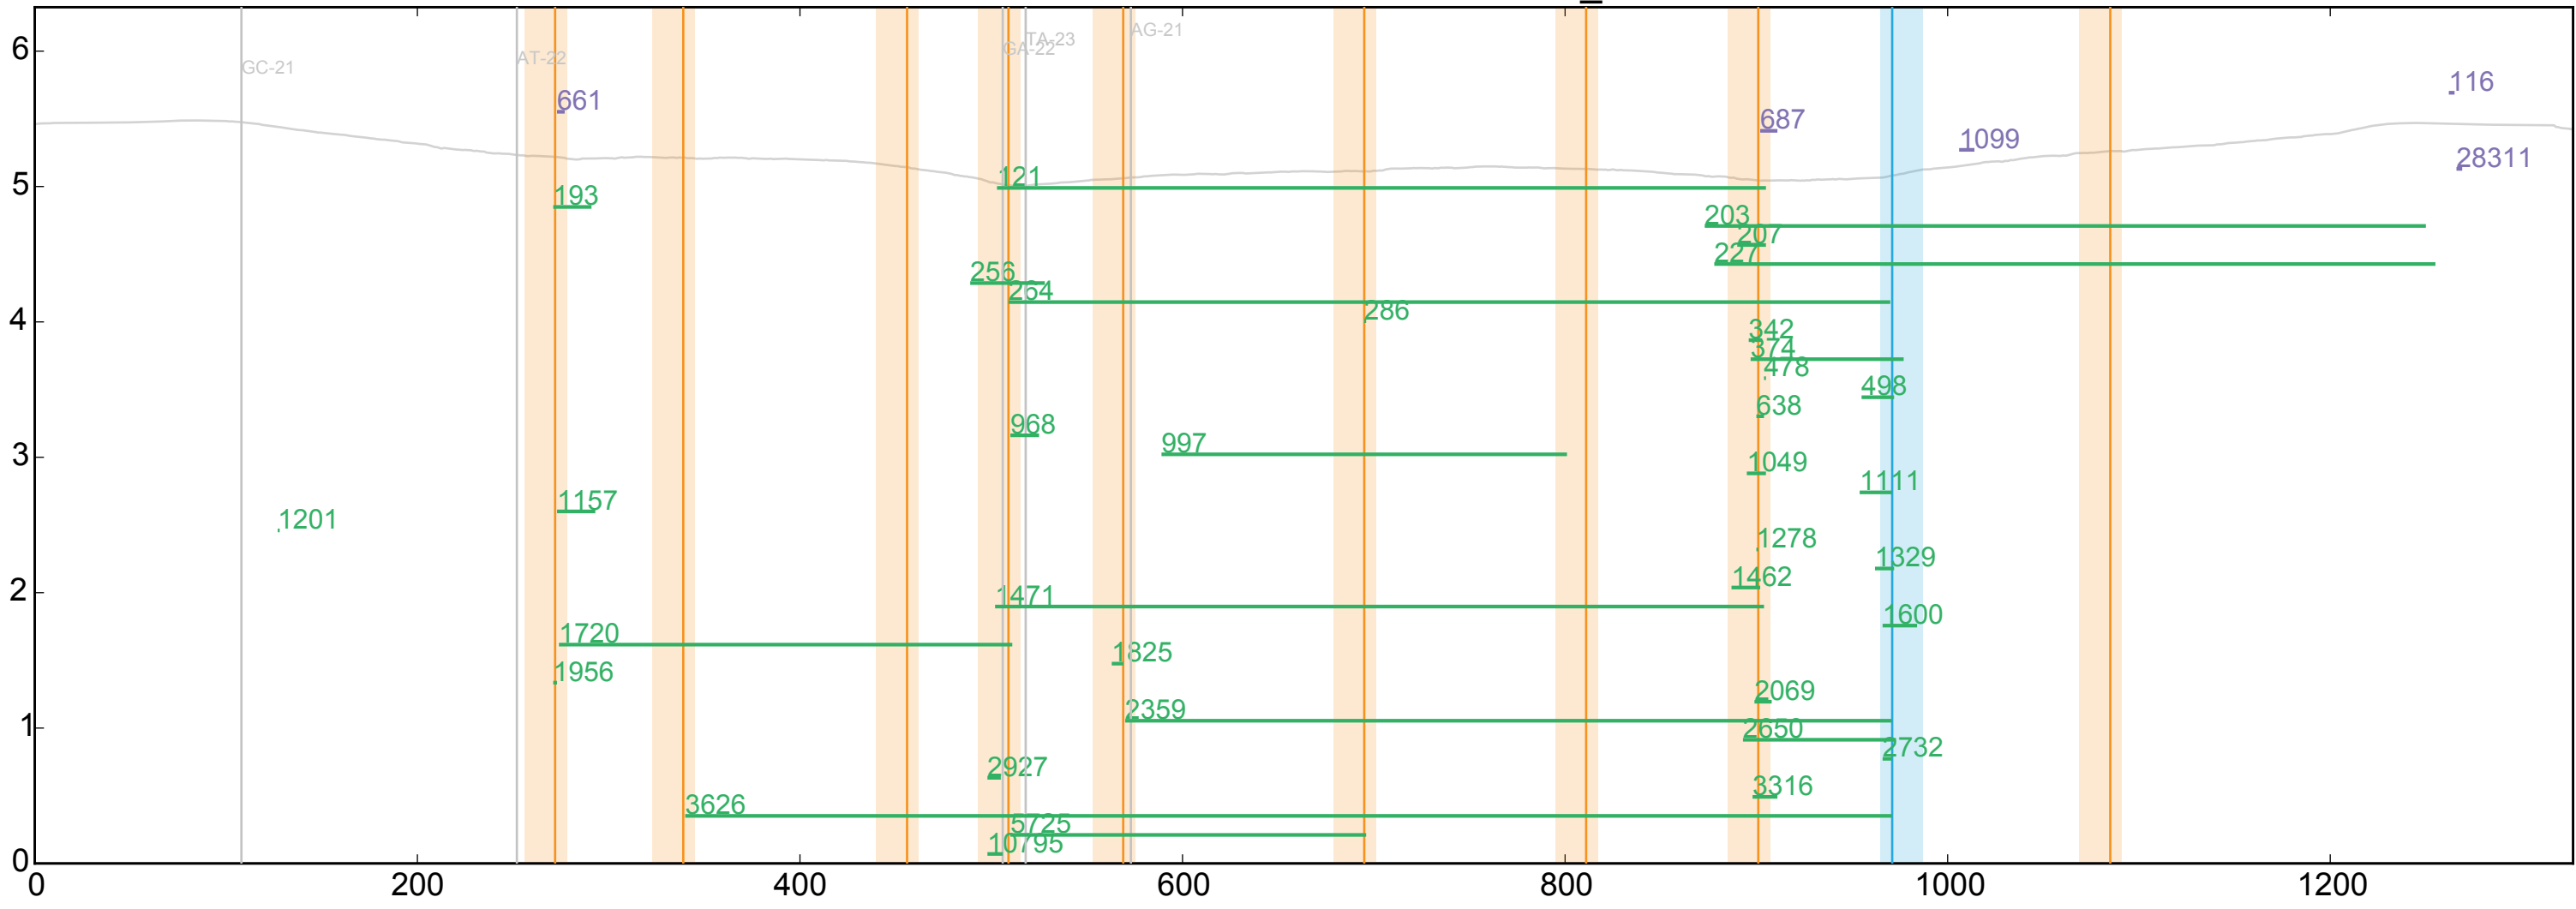

WT ENSDARG00000063258\_0

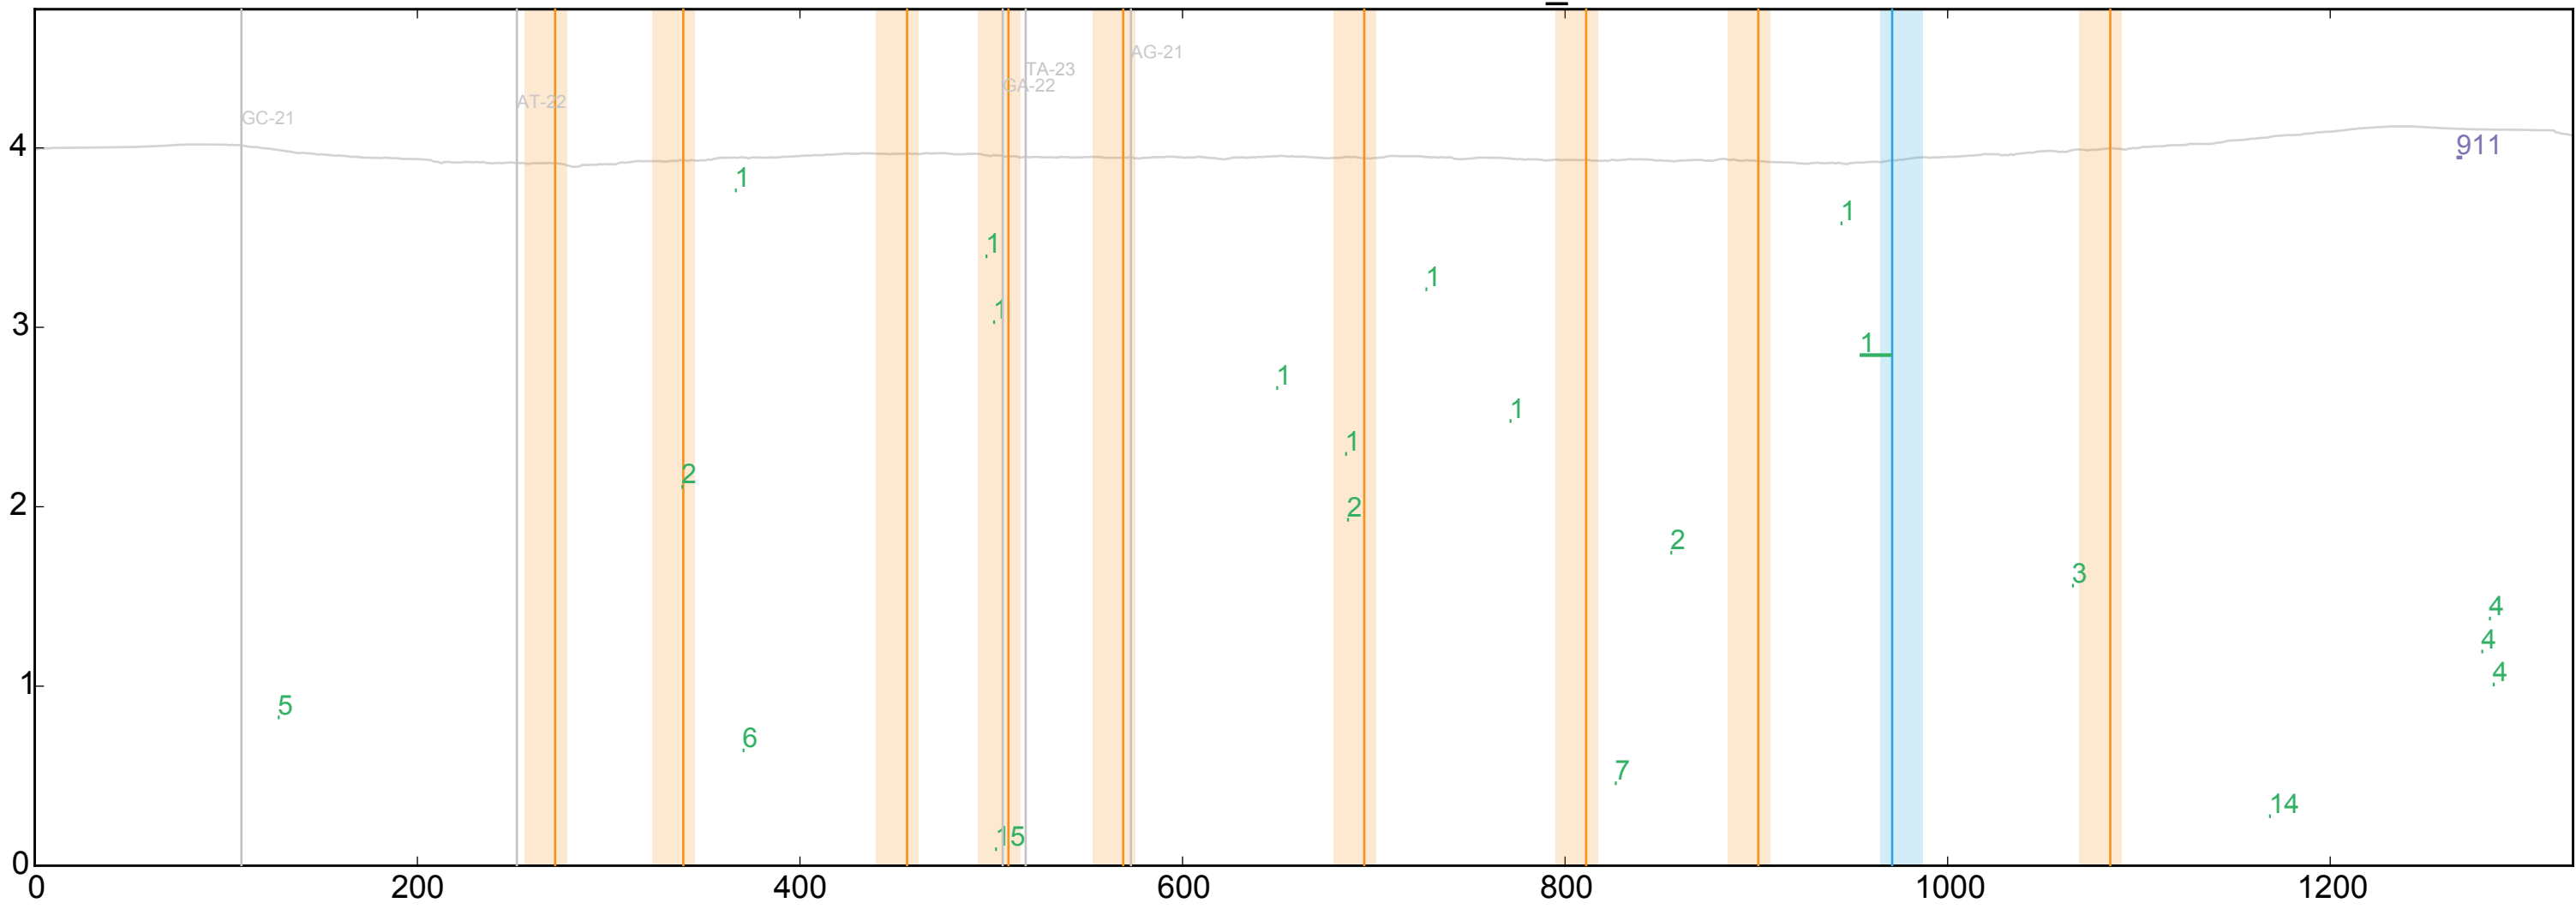

Mutant ENSDARG00000055054\_0

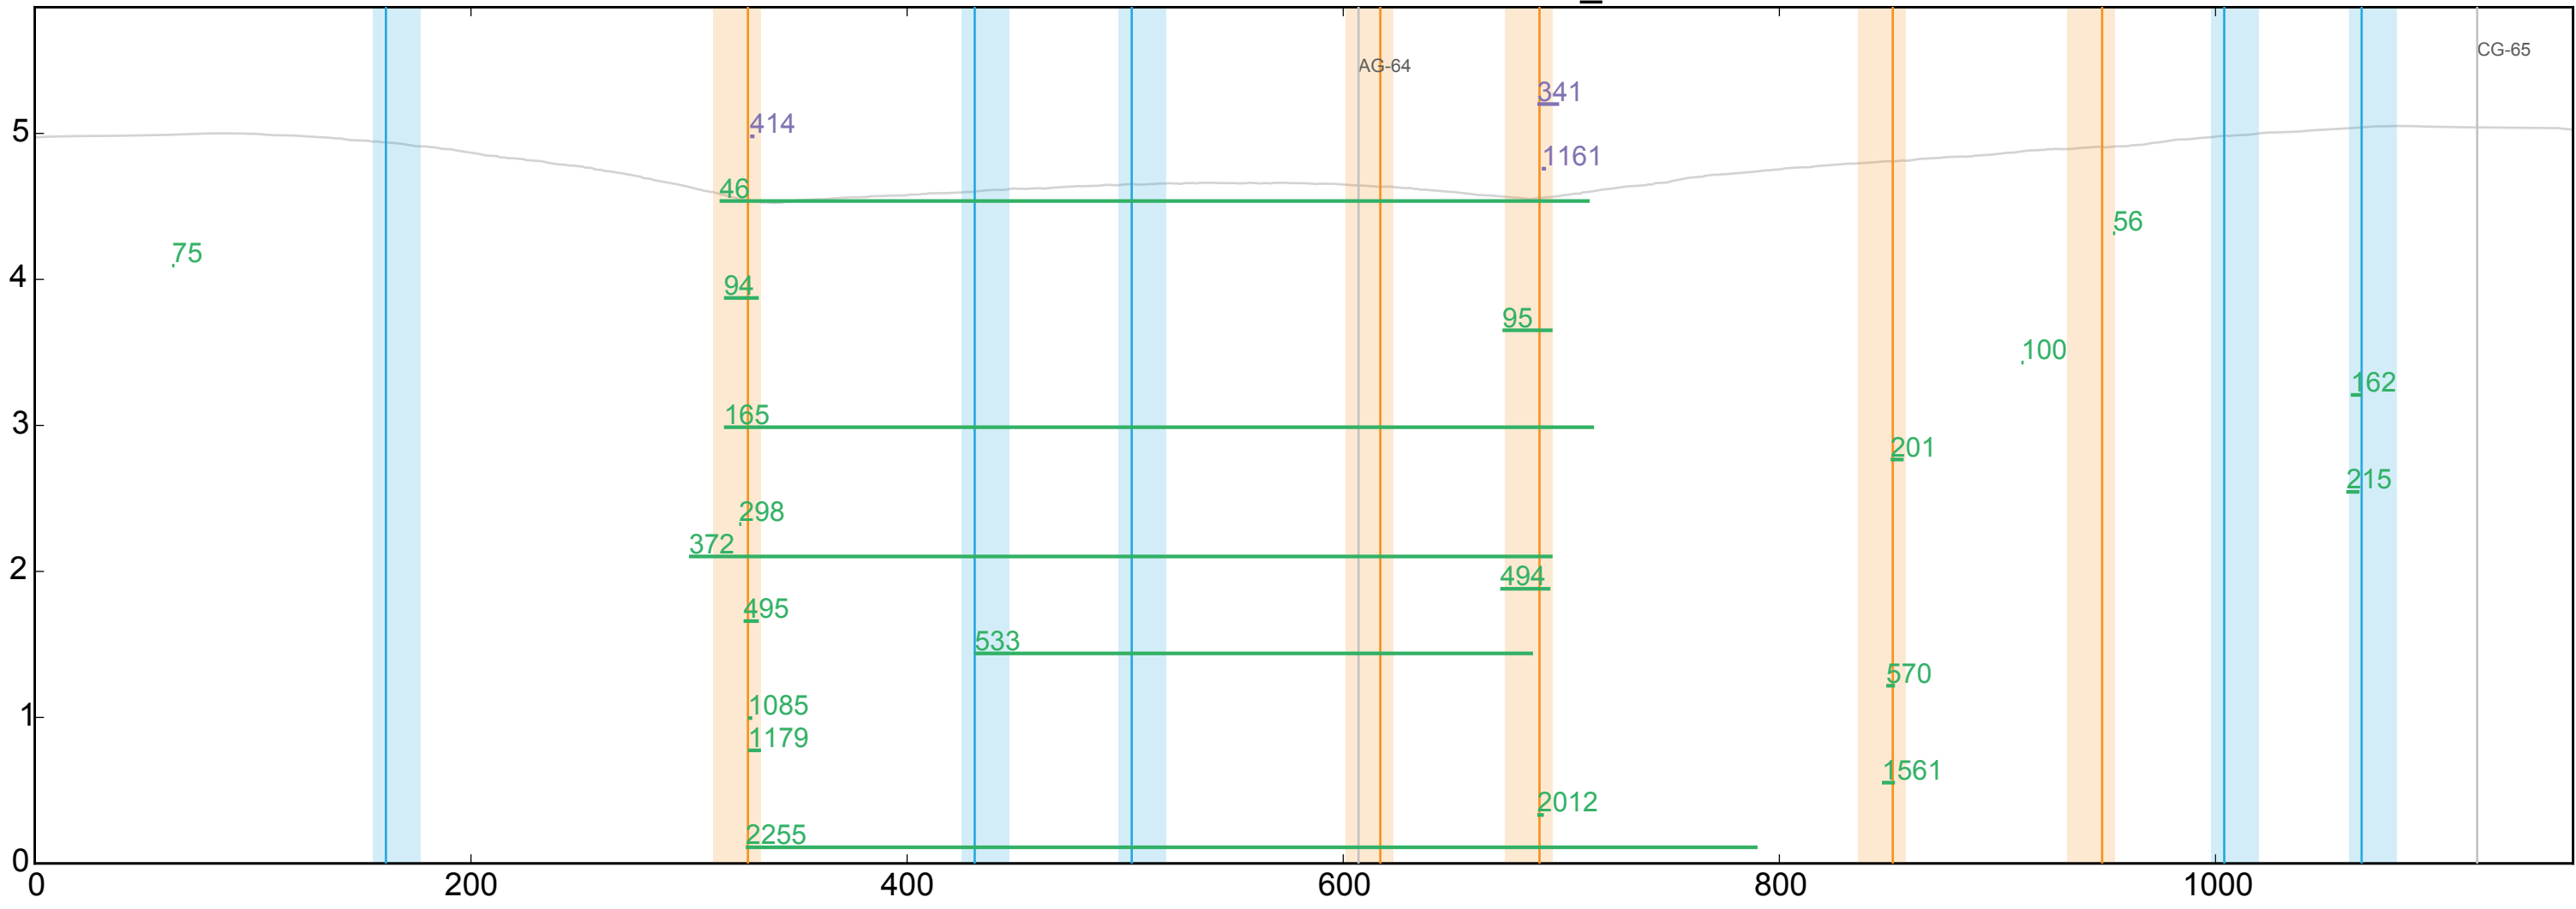

WT ENSDARG00000055054\_0

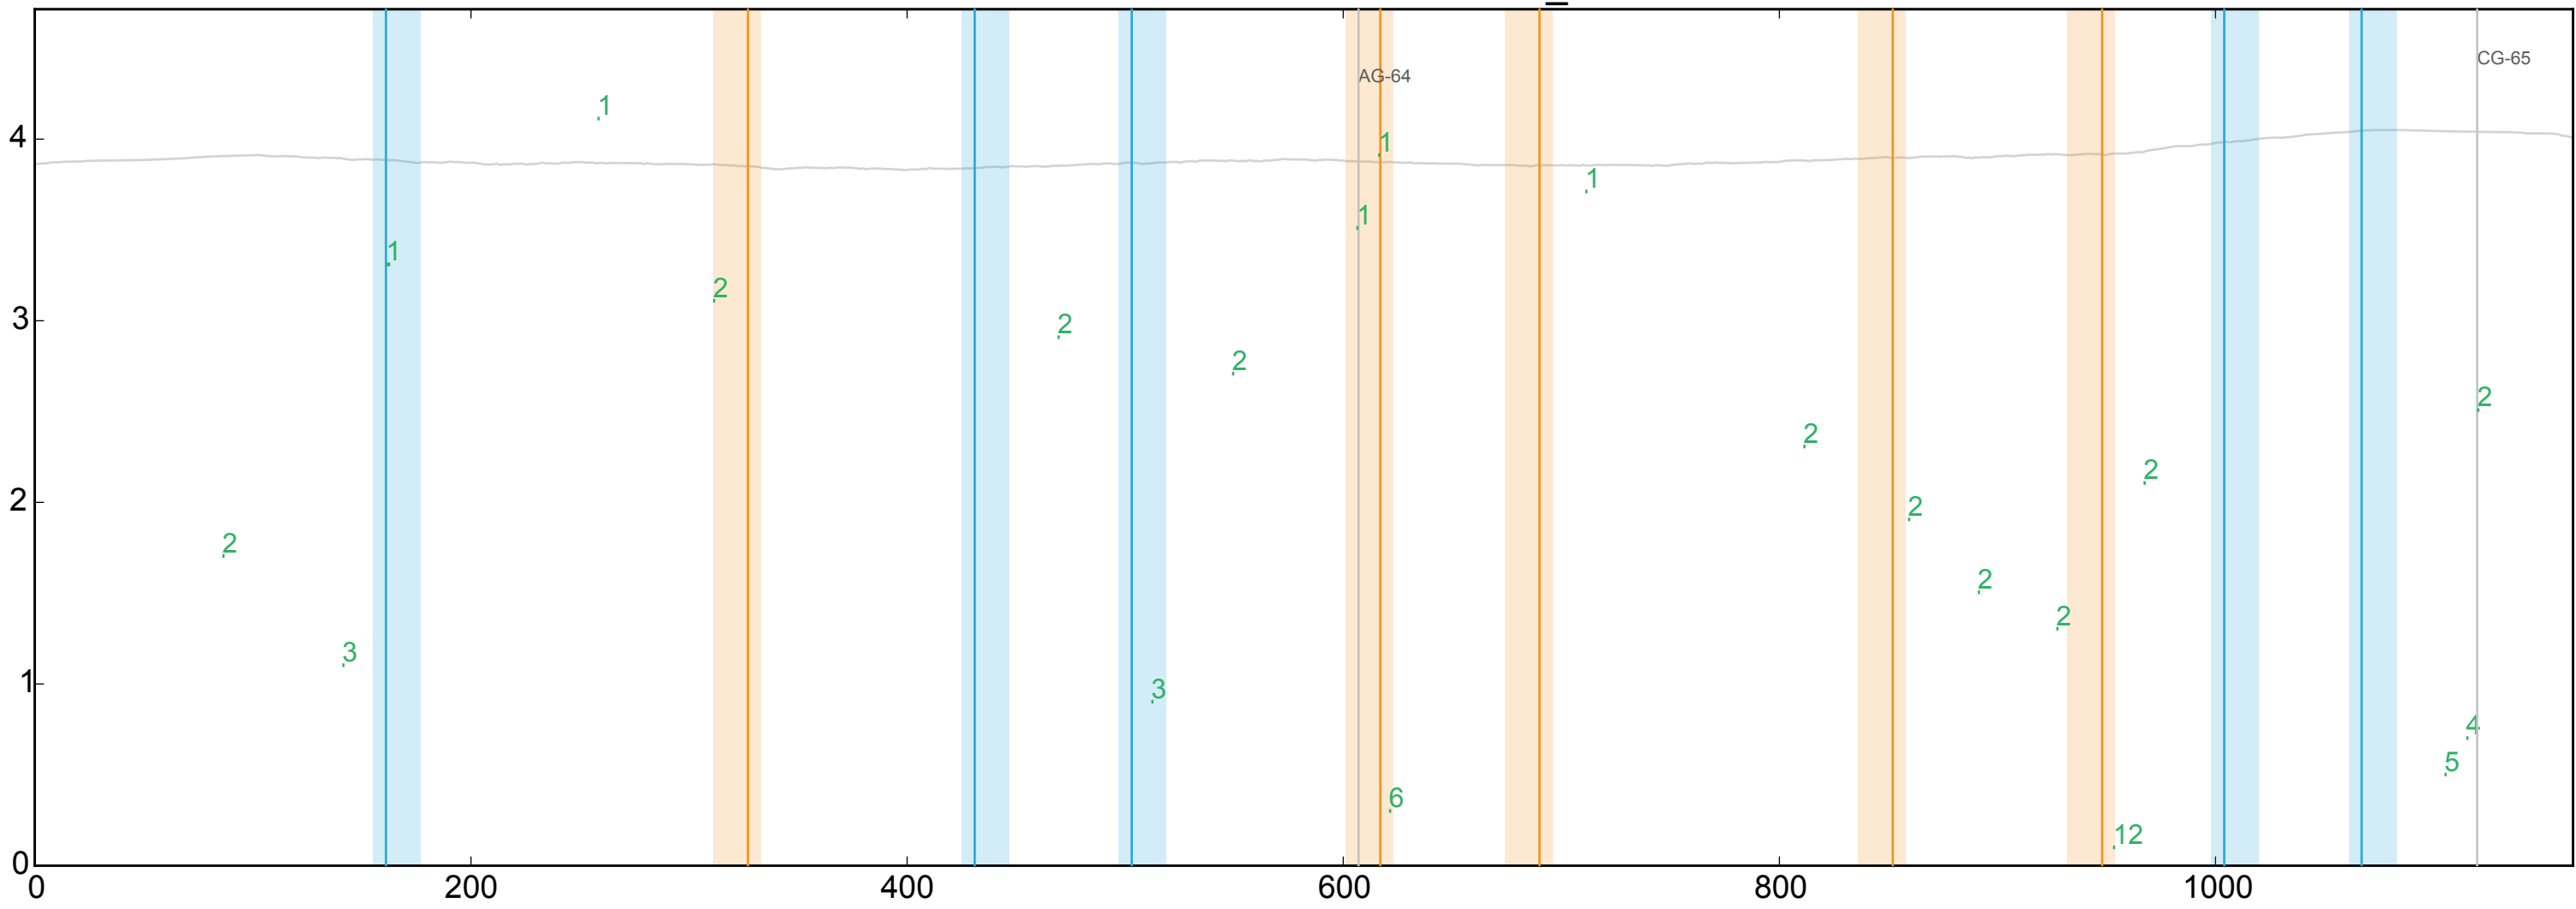

Mutant ENSDARG00000090470\_0

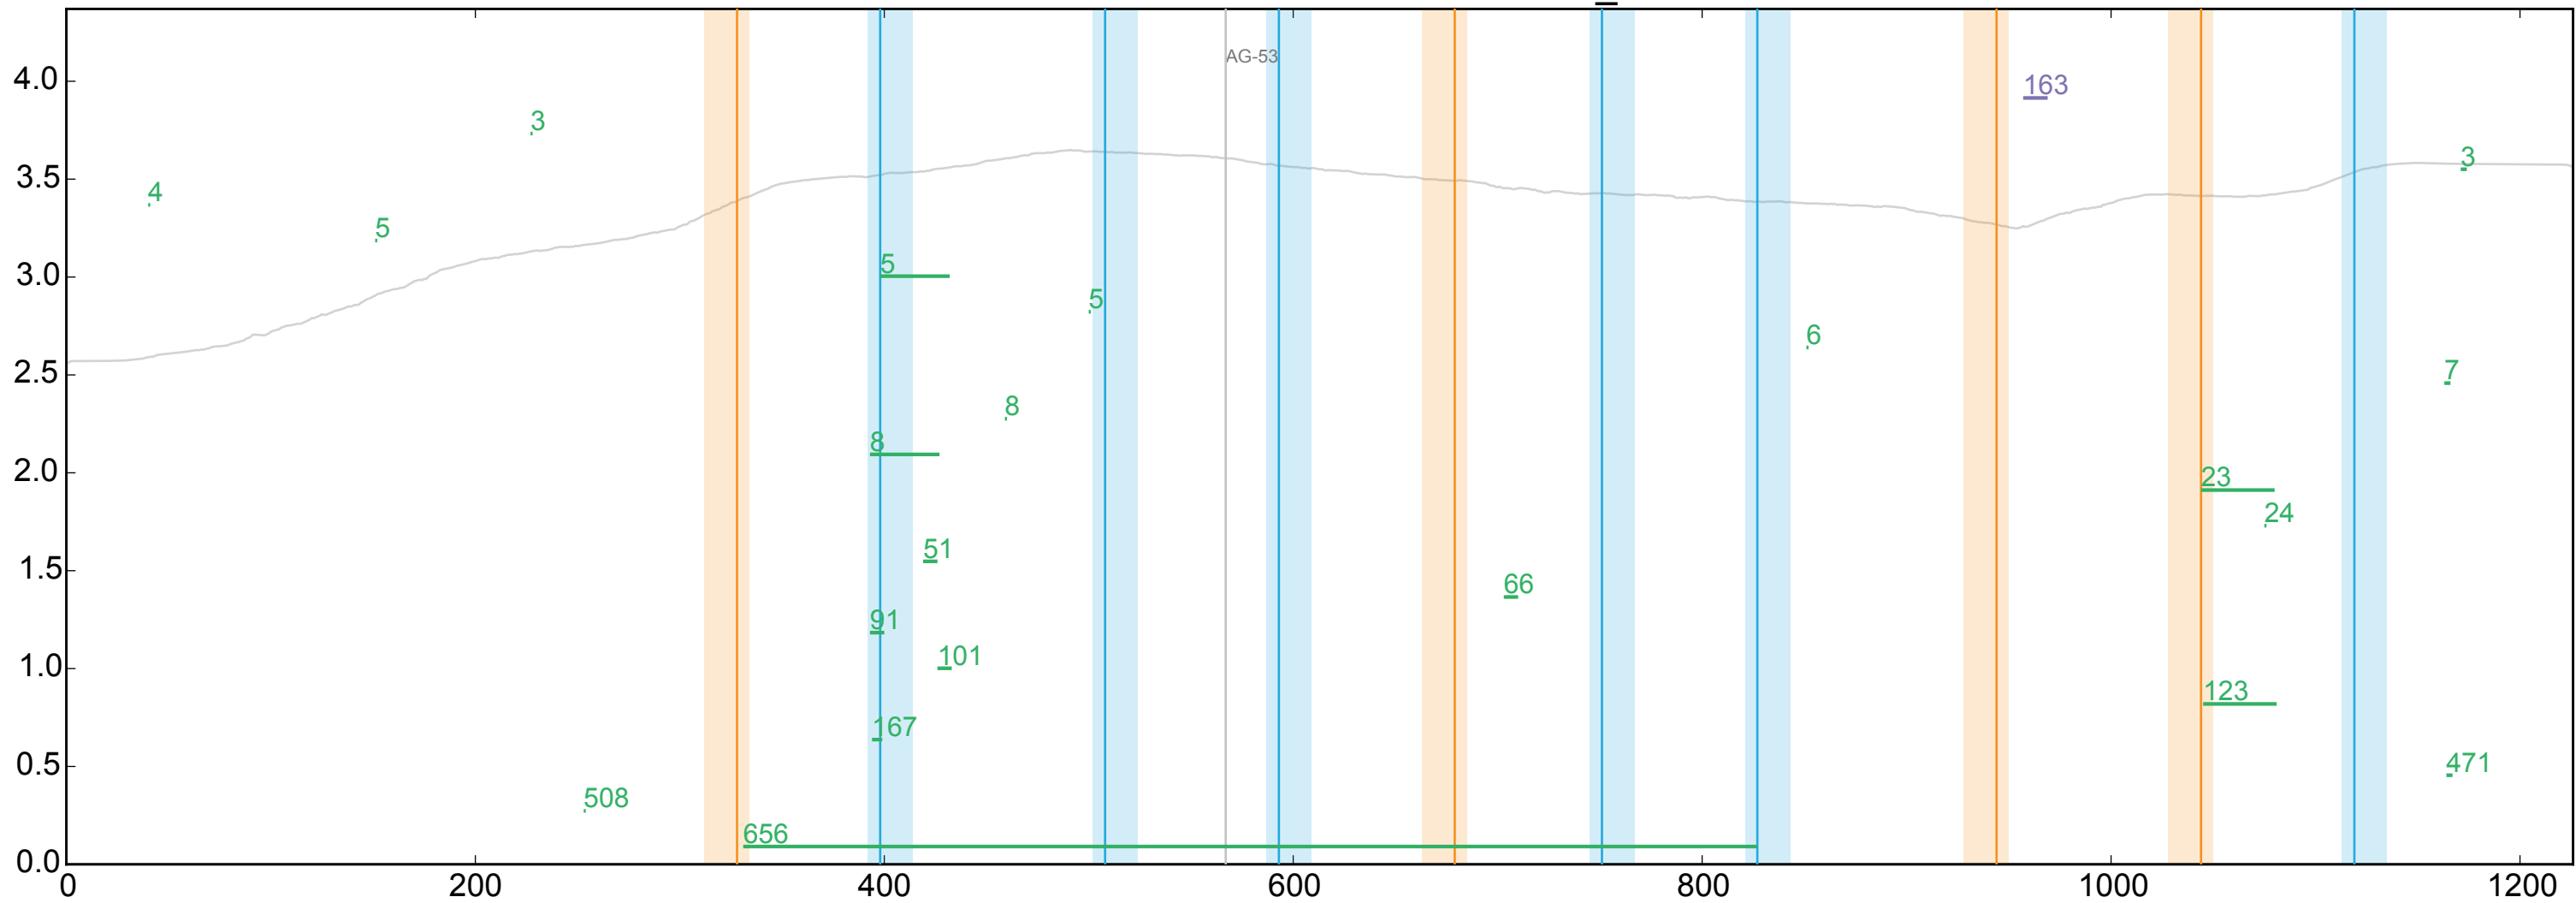

WT ENSDARG00000090470\_0

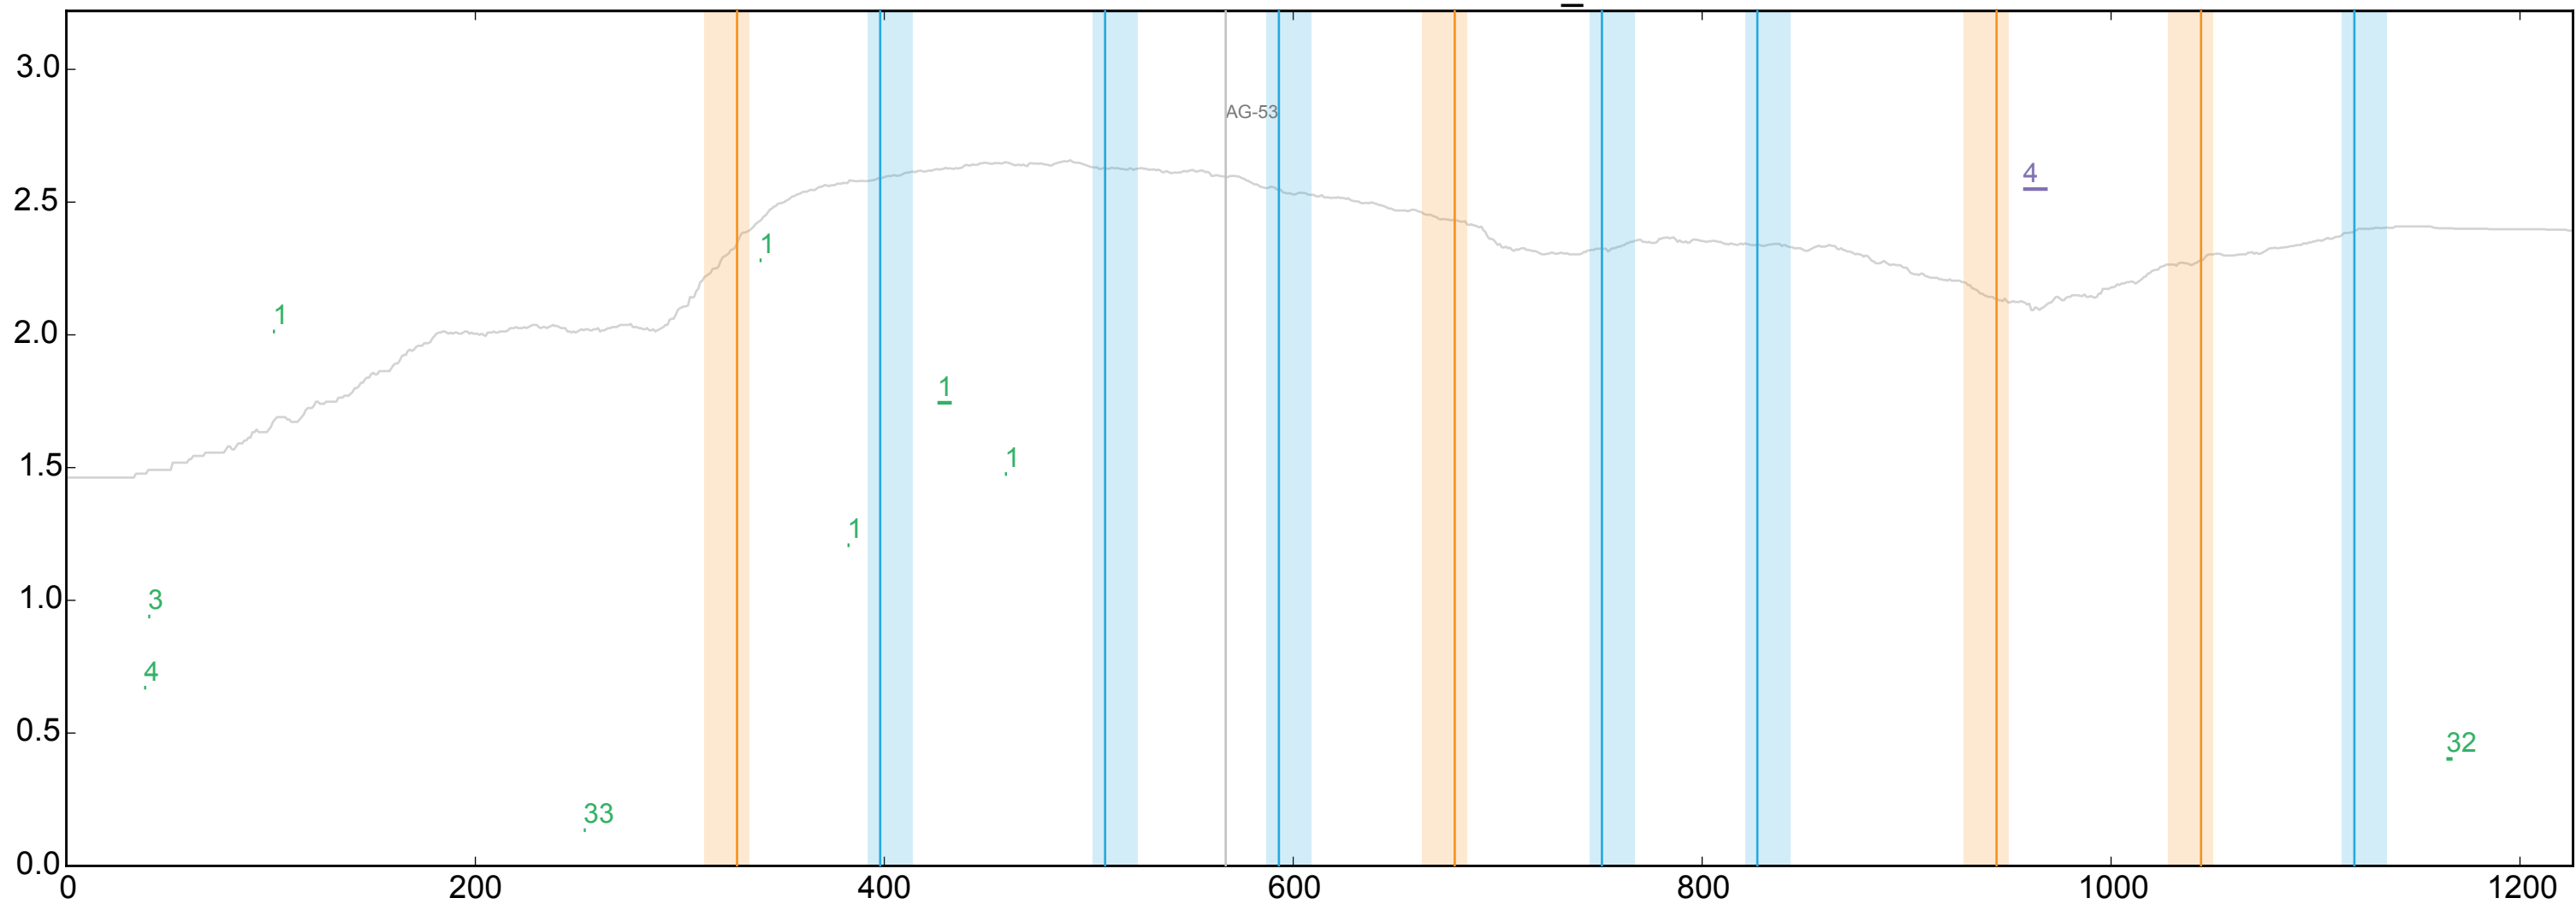

Mutant ENSDARG00000075593\_0

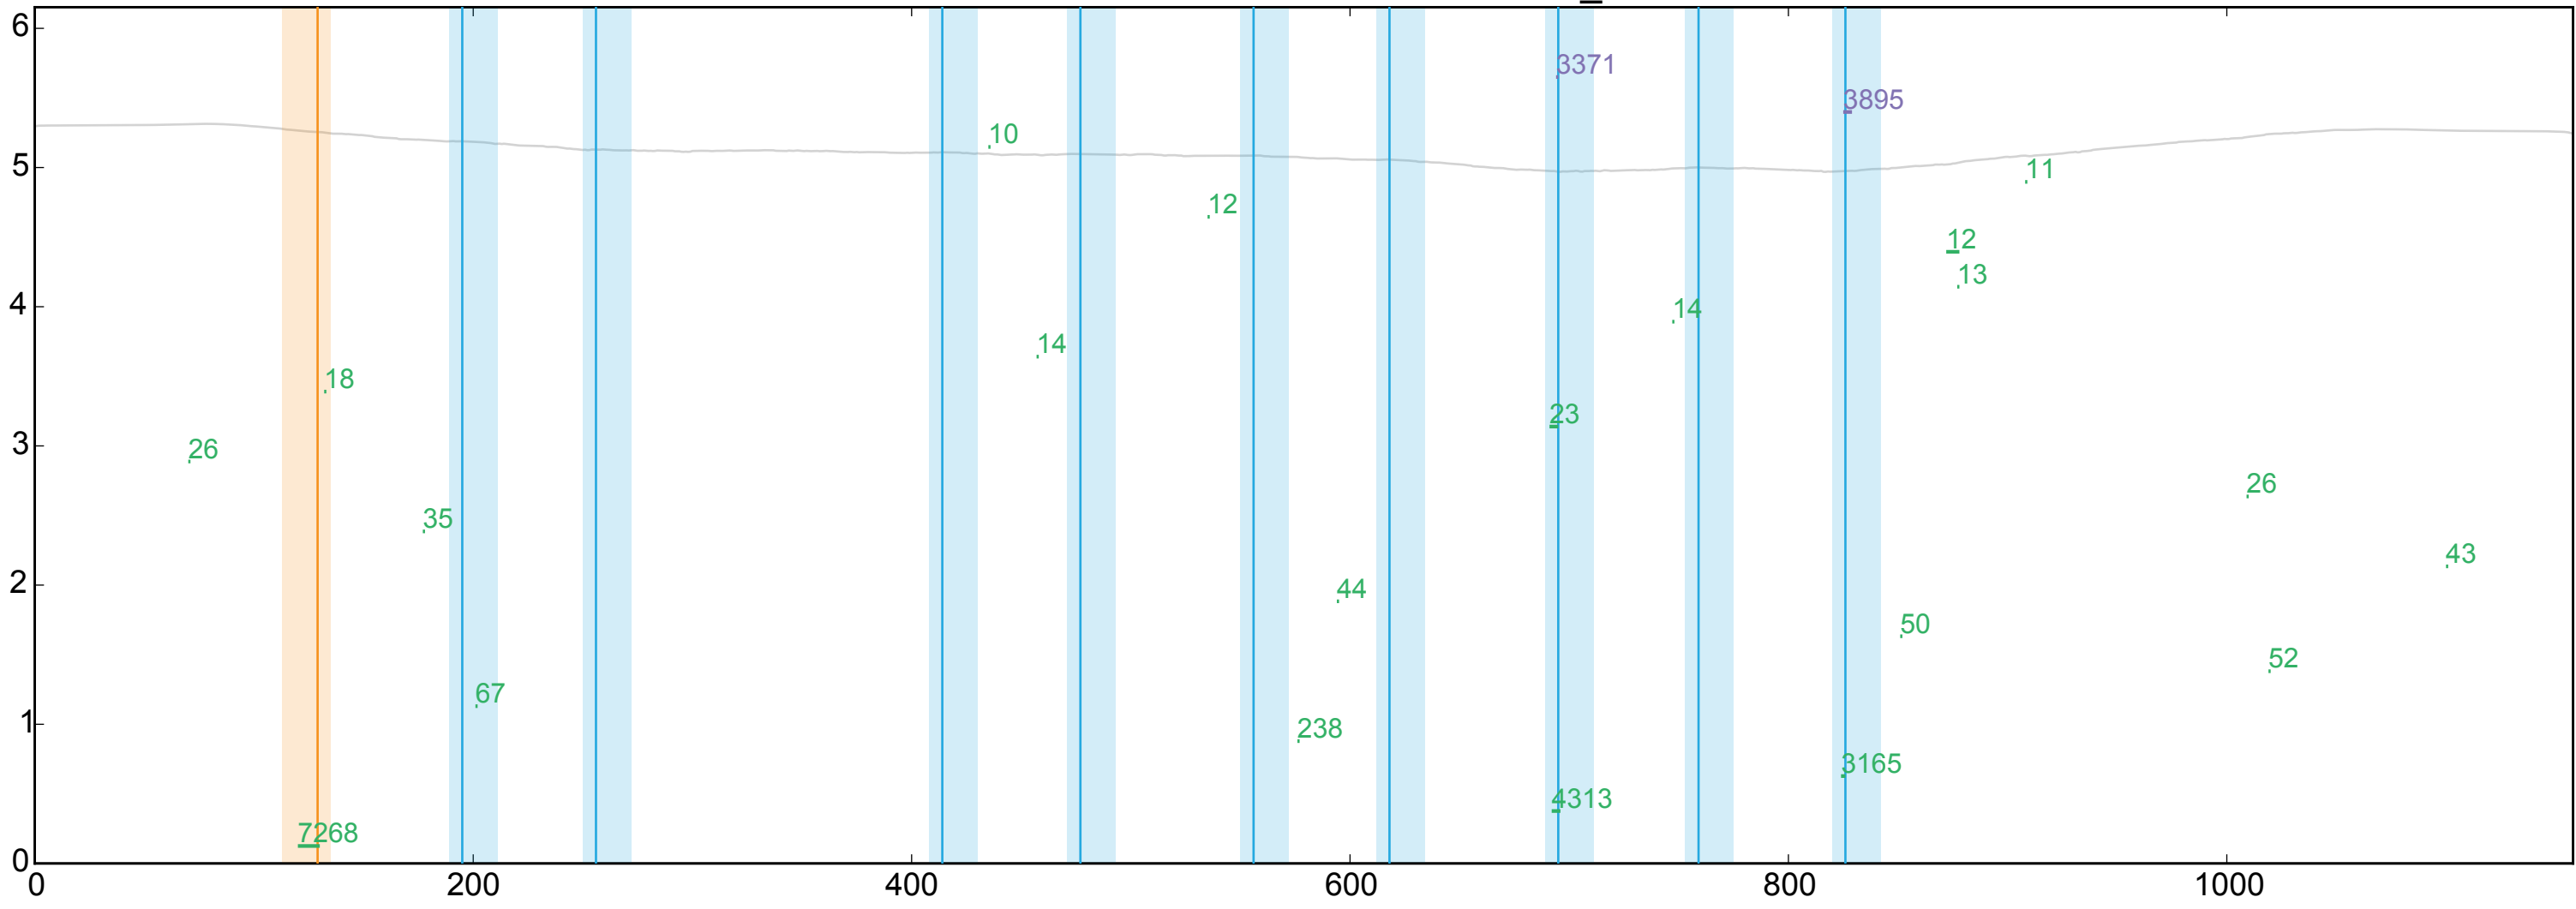

WT ENSDARG00000075593\_0

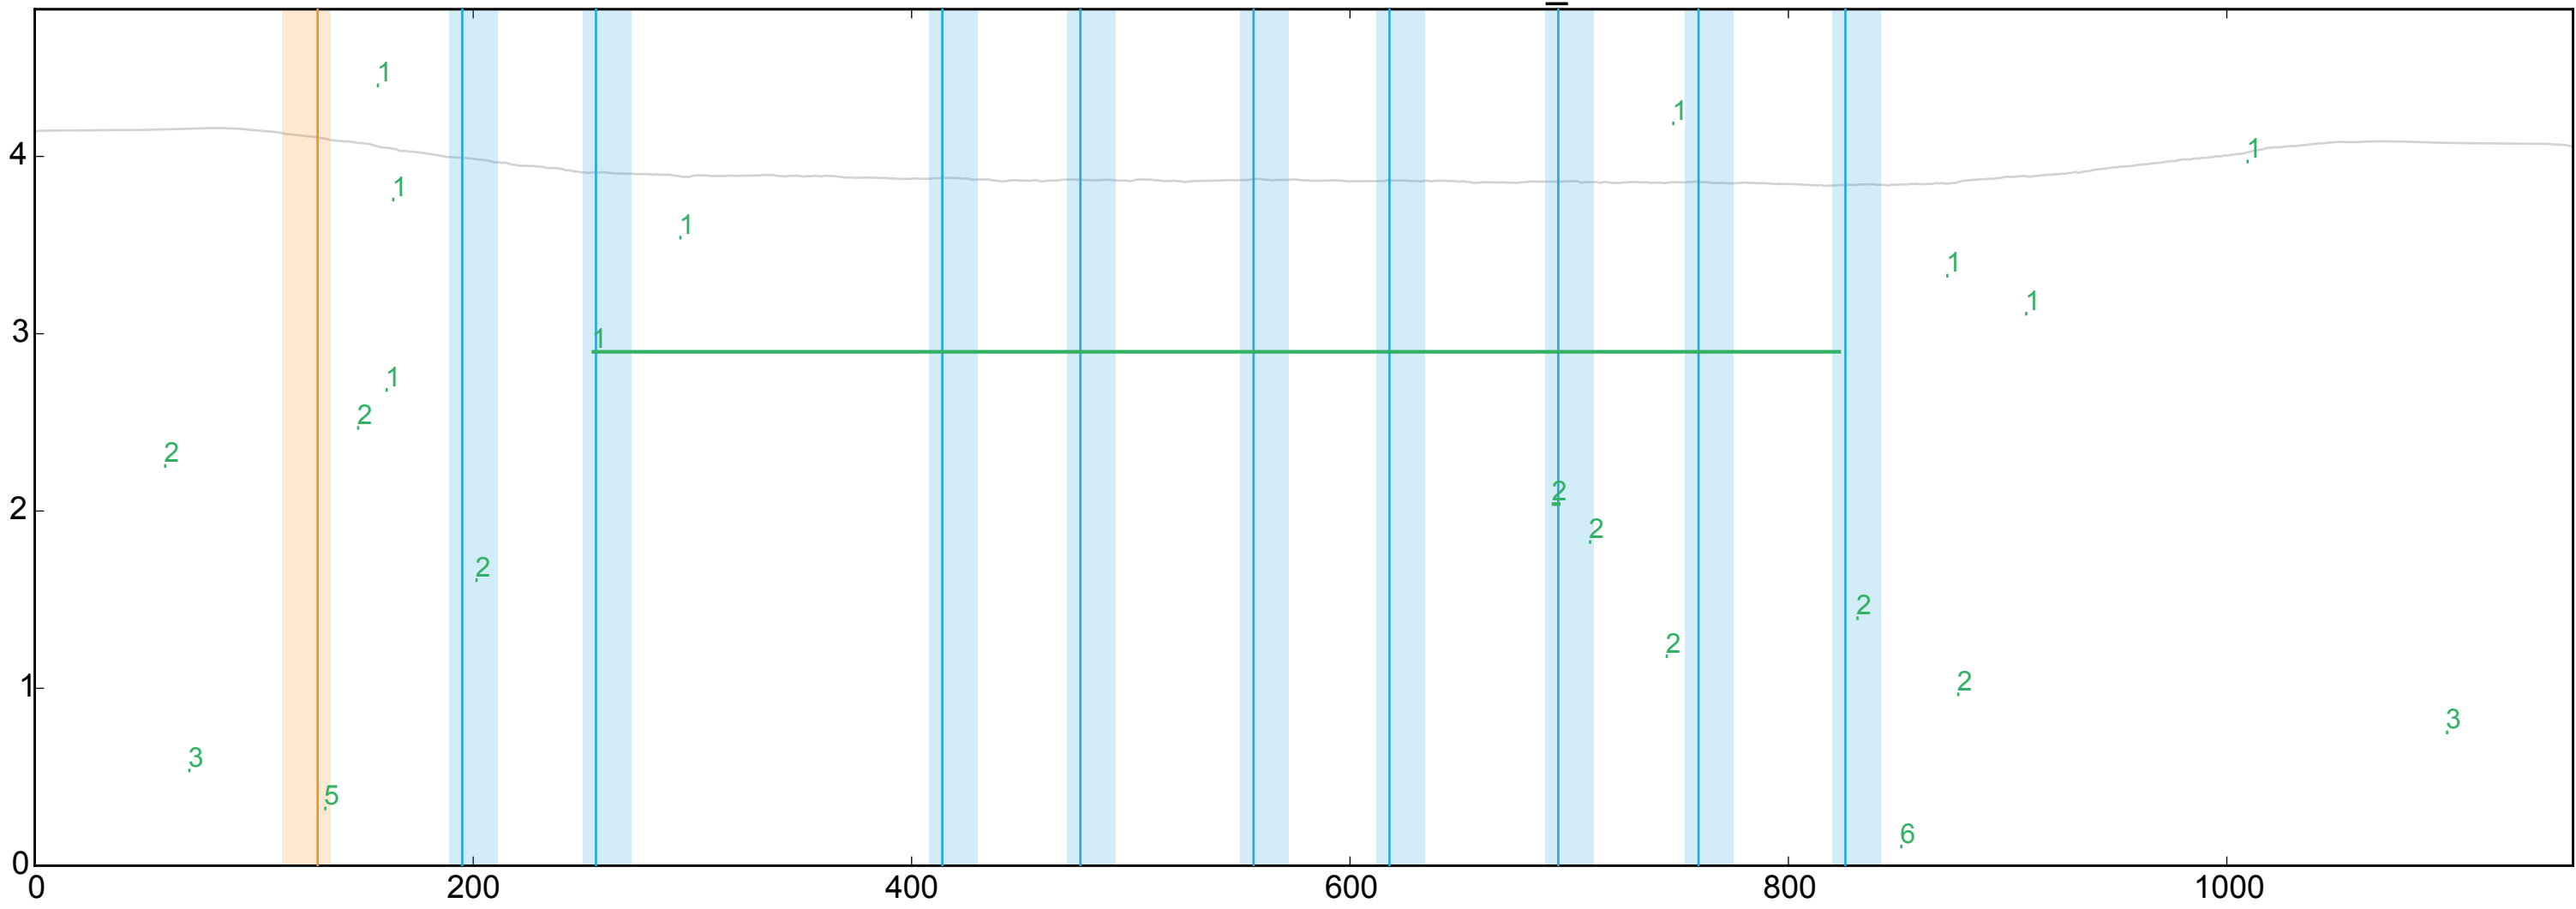



Mutant ENSDARG0000092067\_5

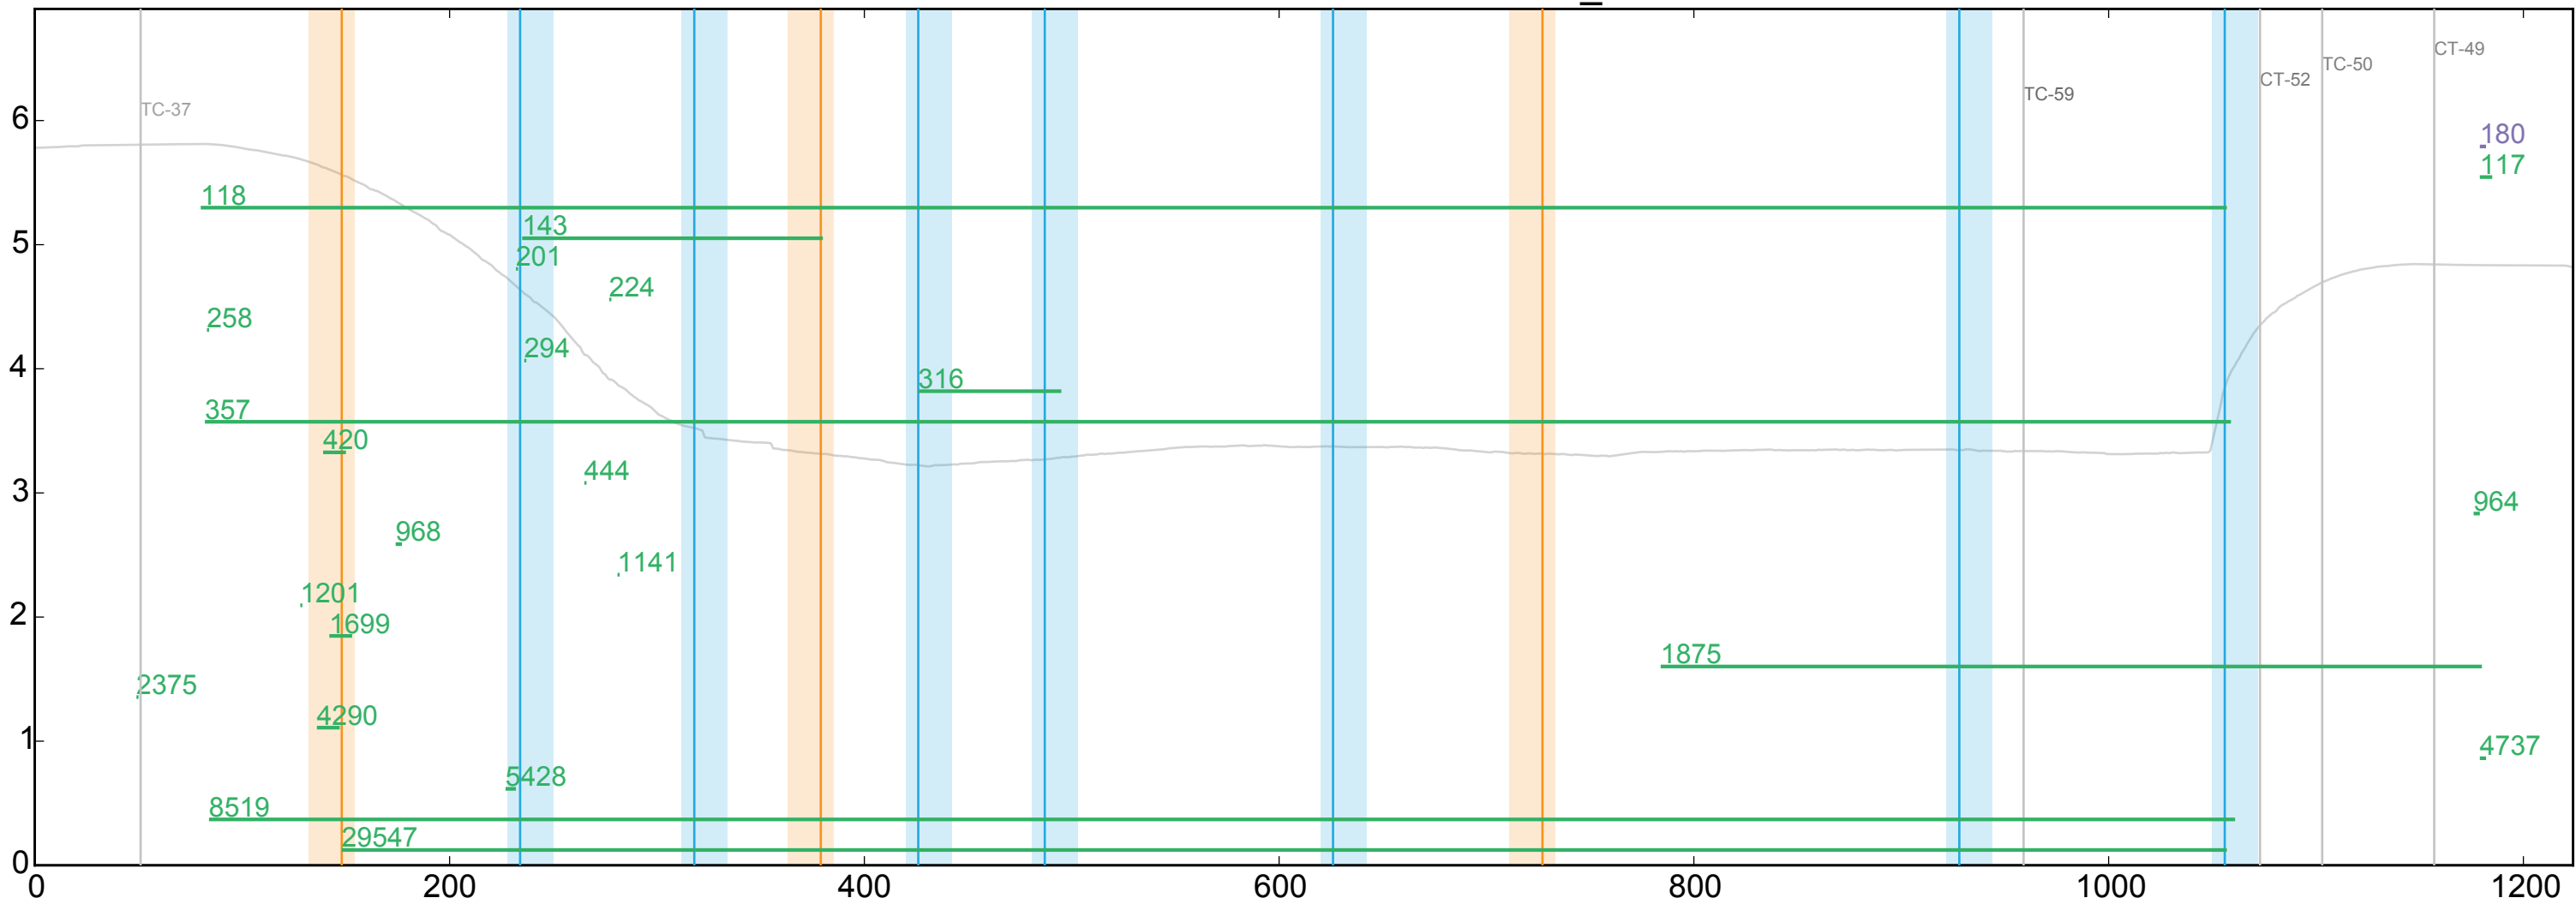

WT ENSDARG0000092067\_5

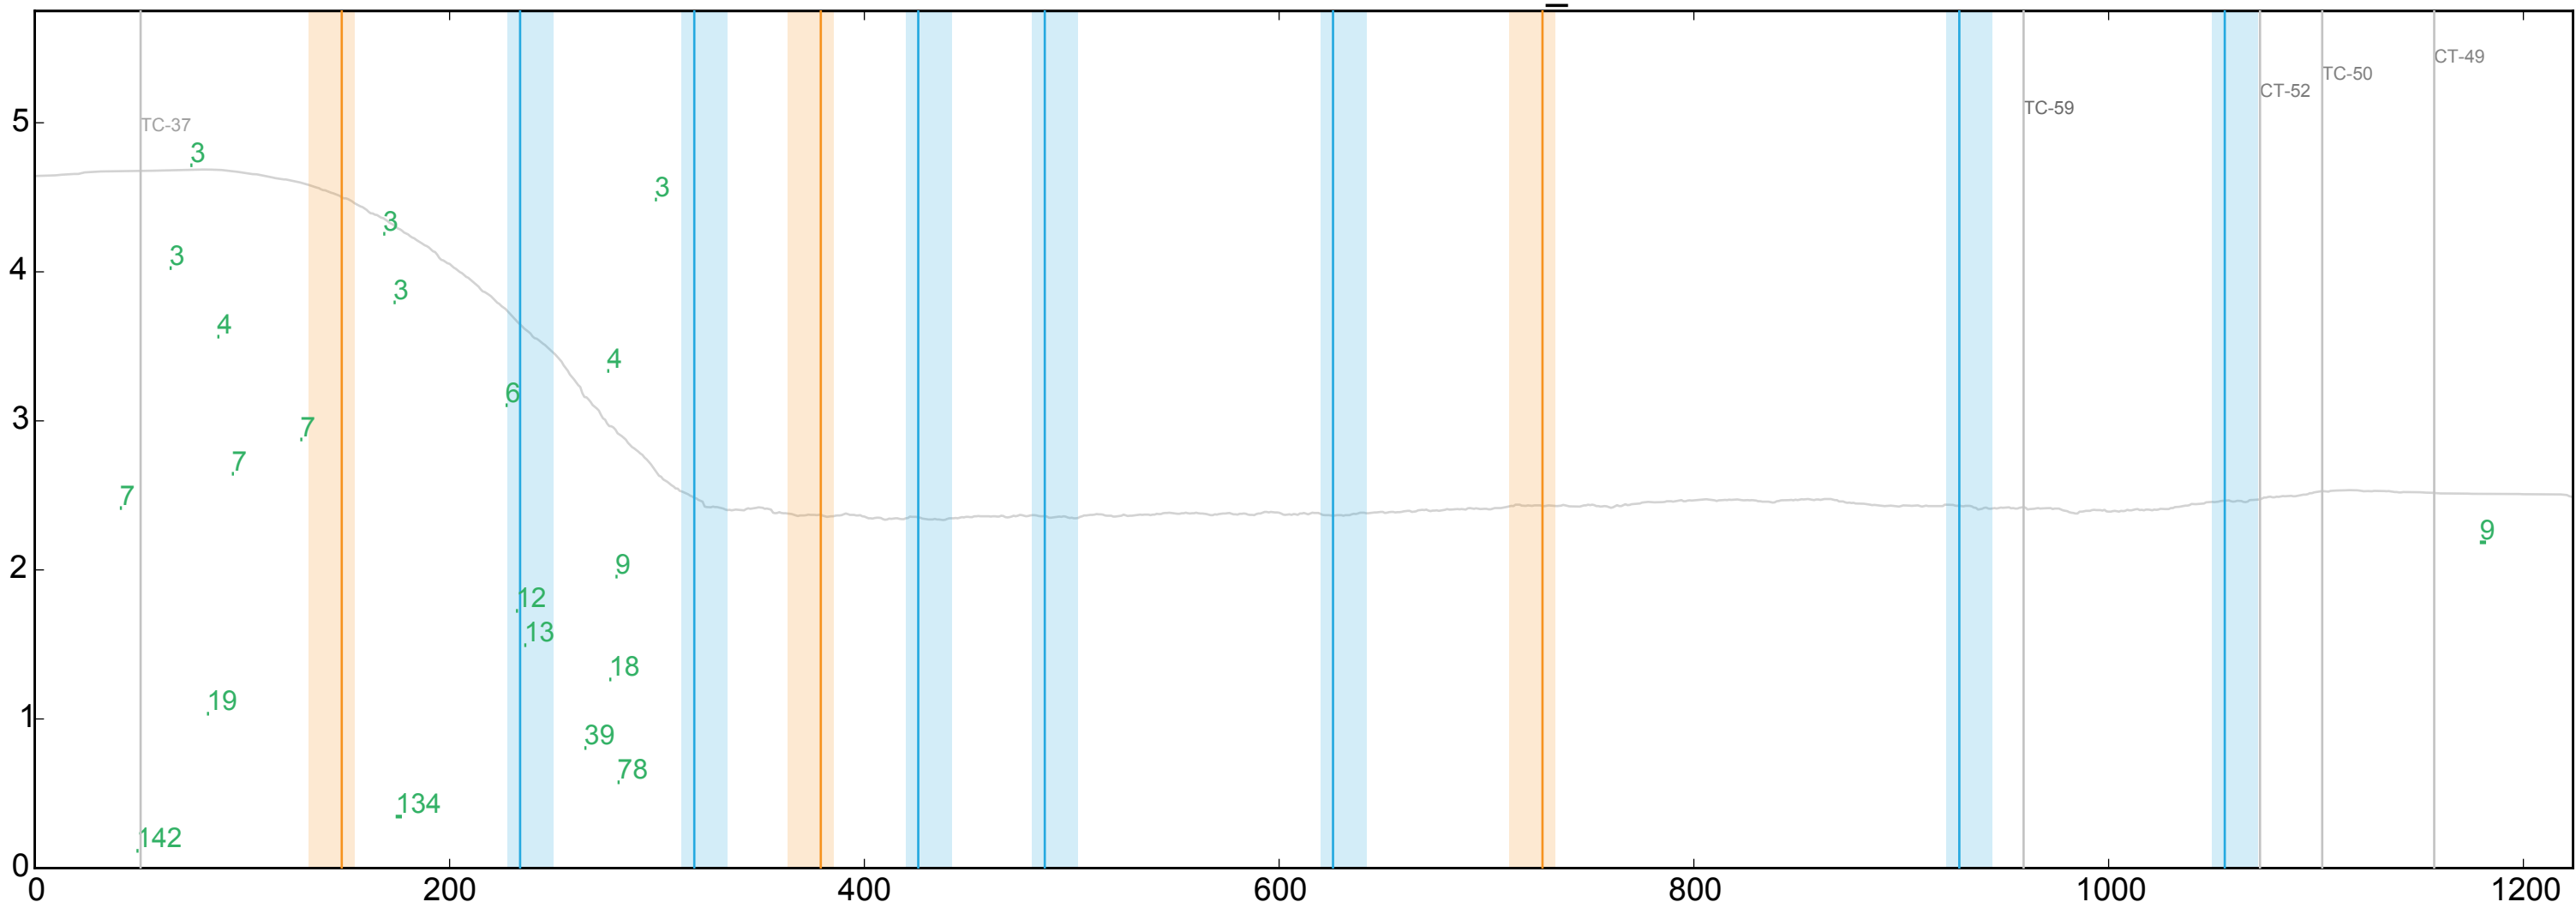

Mutant ENSDARG00000060785\_7

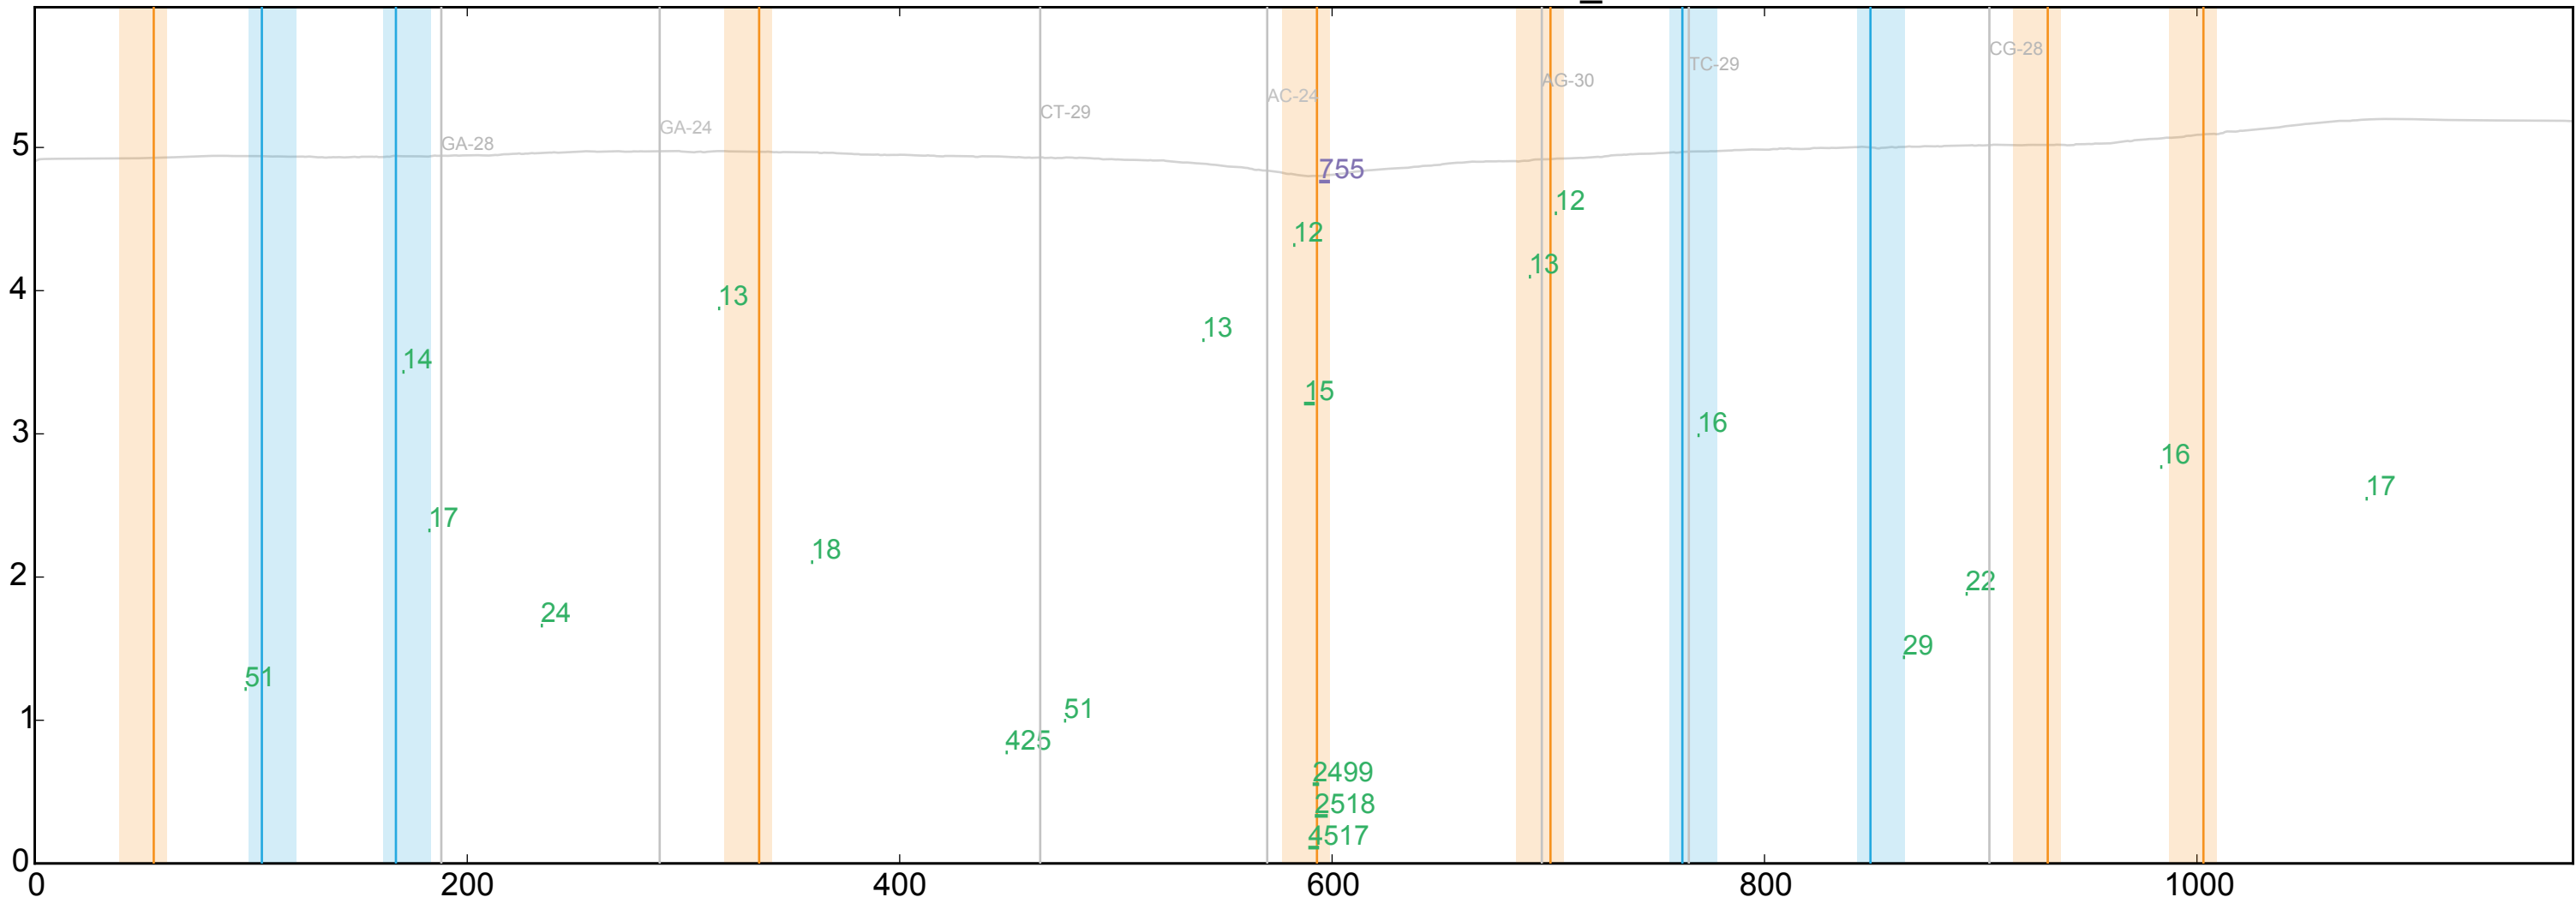

WT ENSDARG00000060785\_7

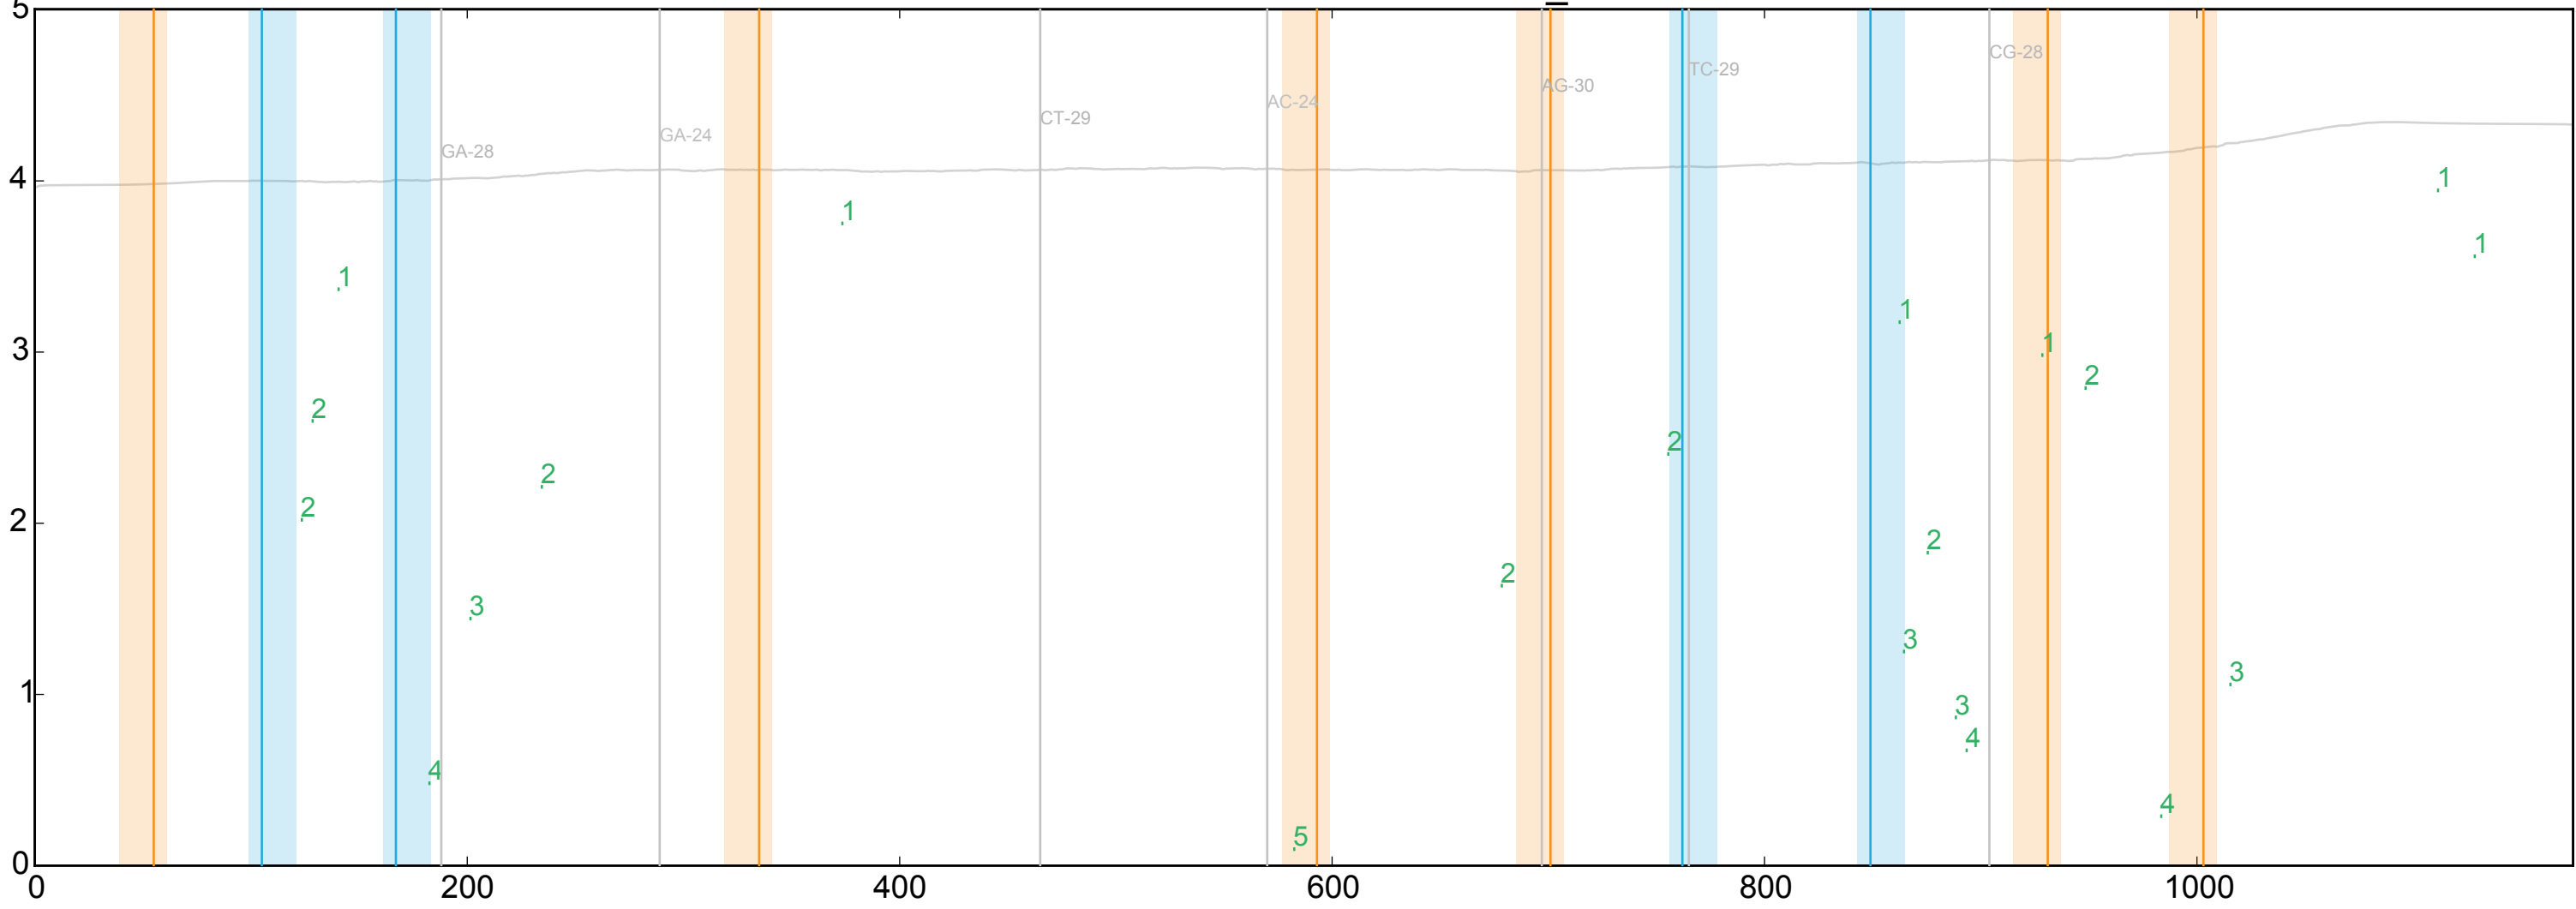

Mutant ENSDARG0000086034\_0

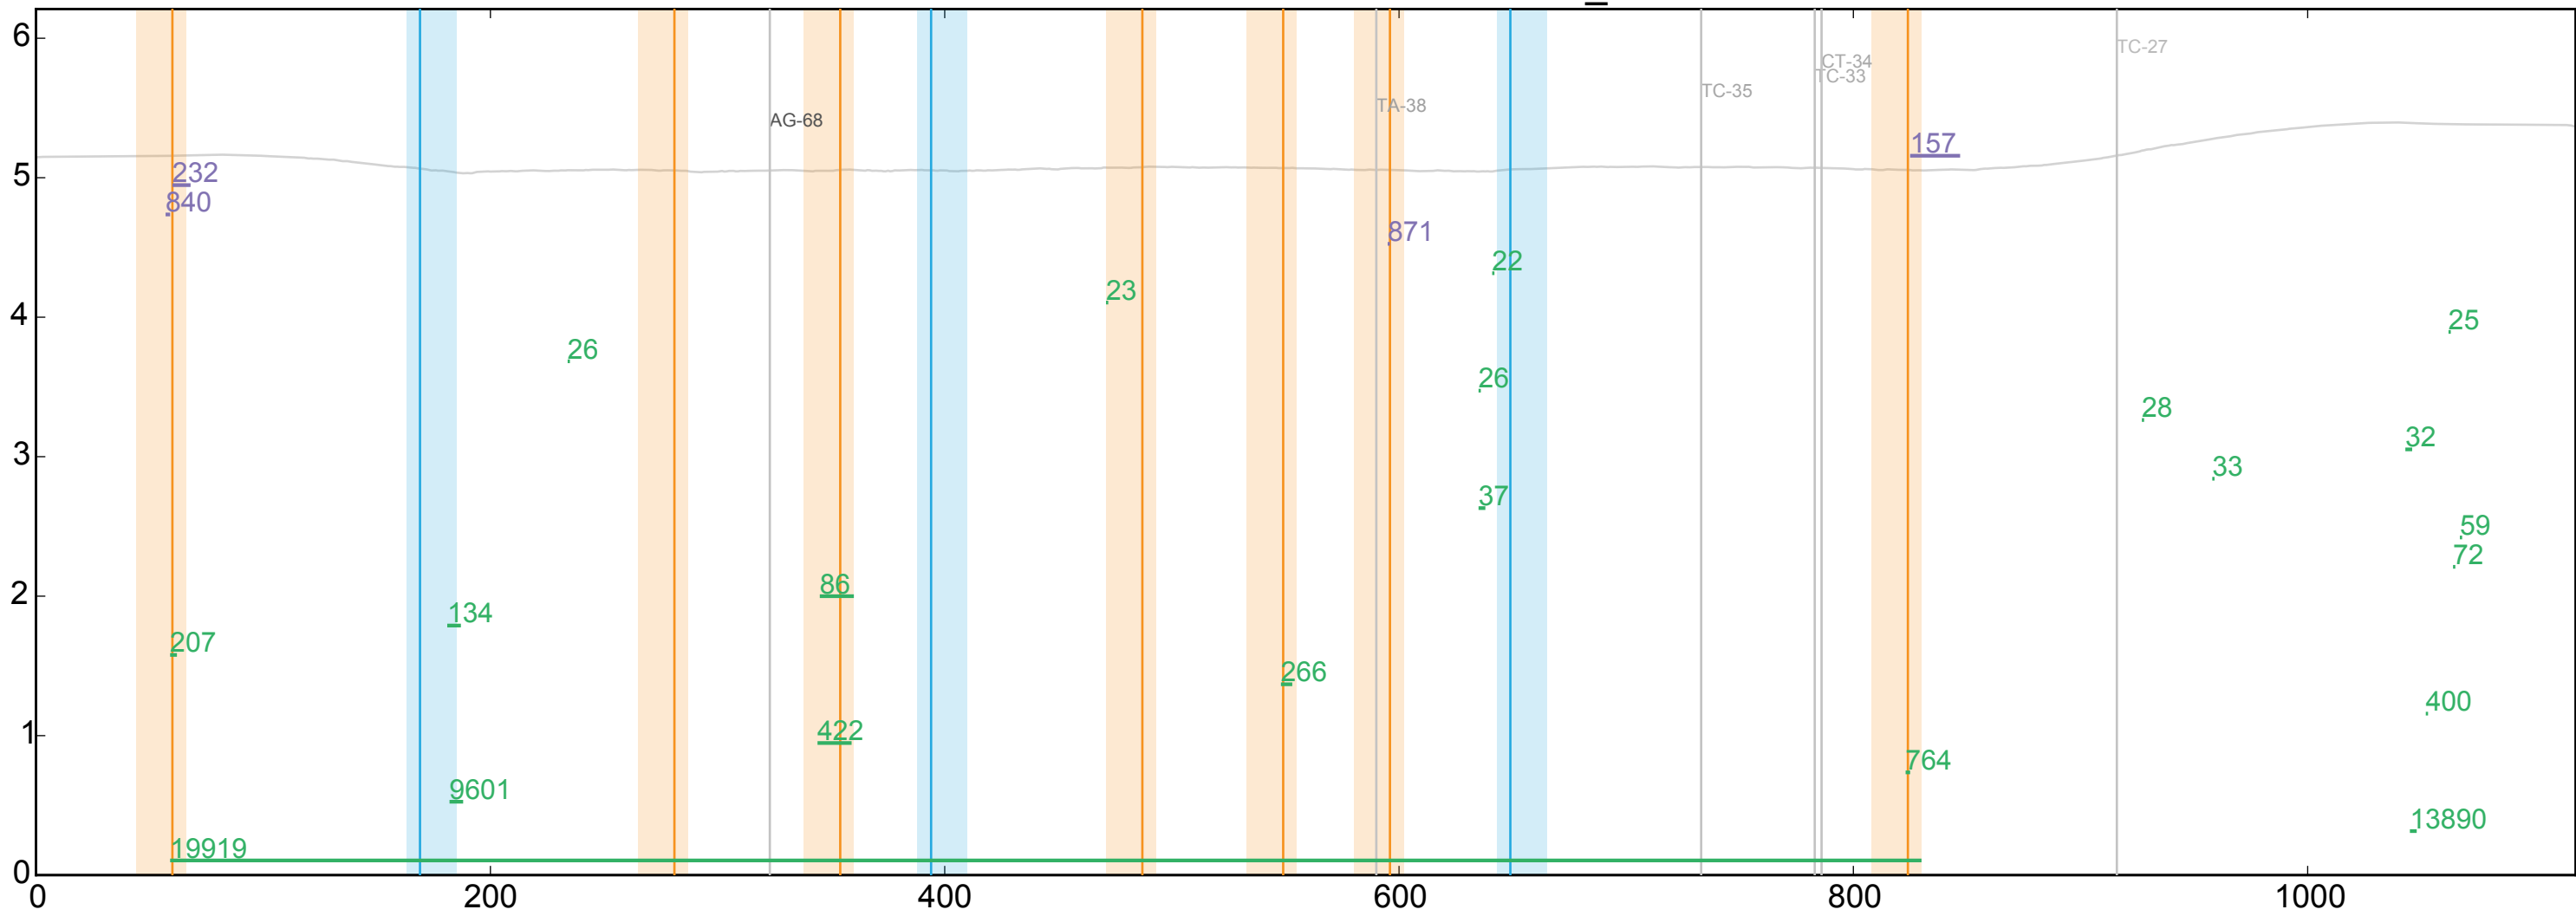

WT ENSDARG0000086034\_0

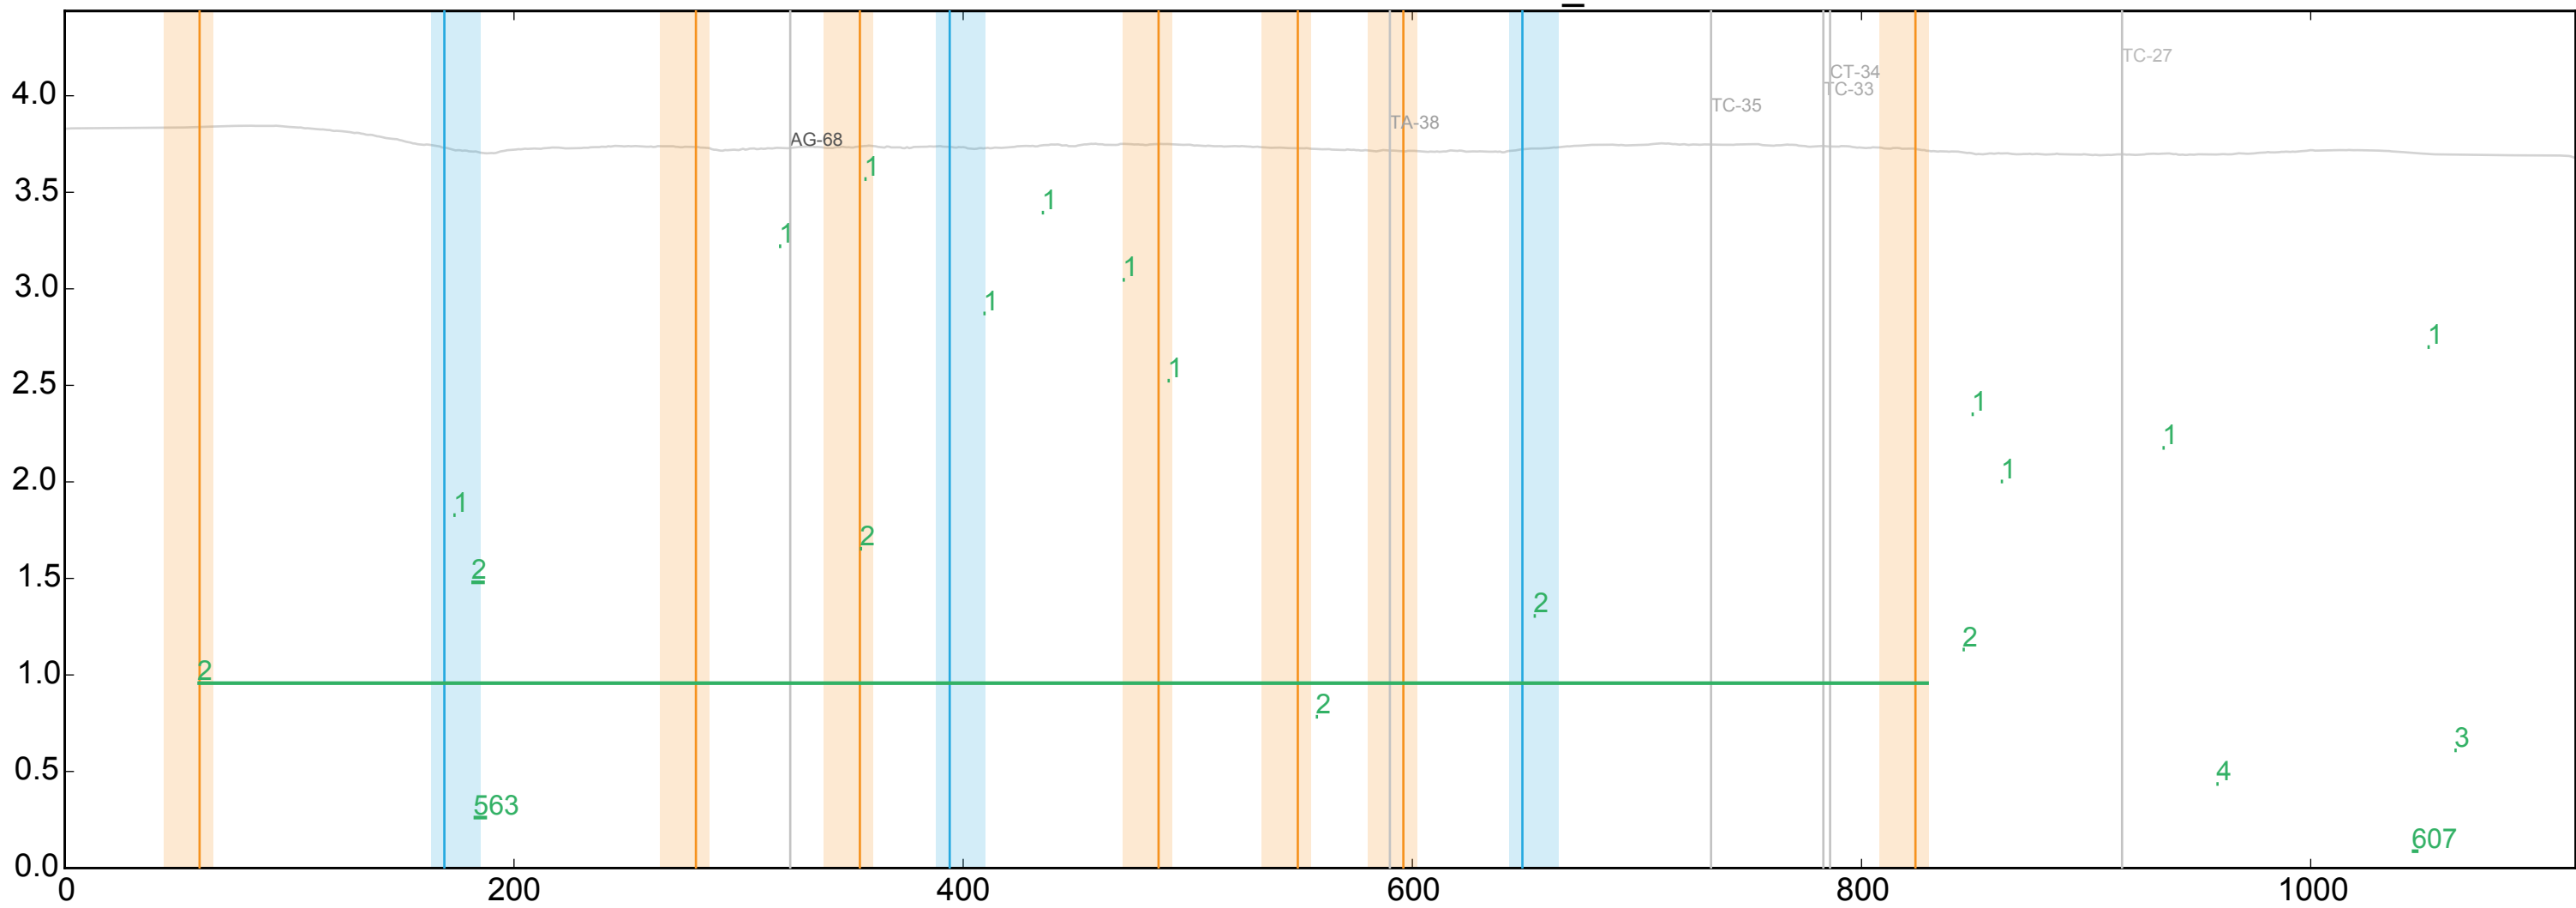

Mutant ENSDARG00000010873\_11

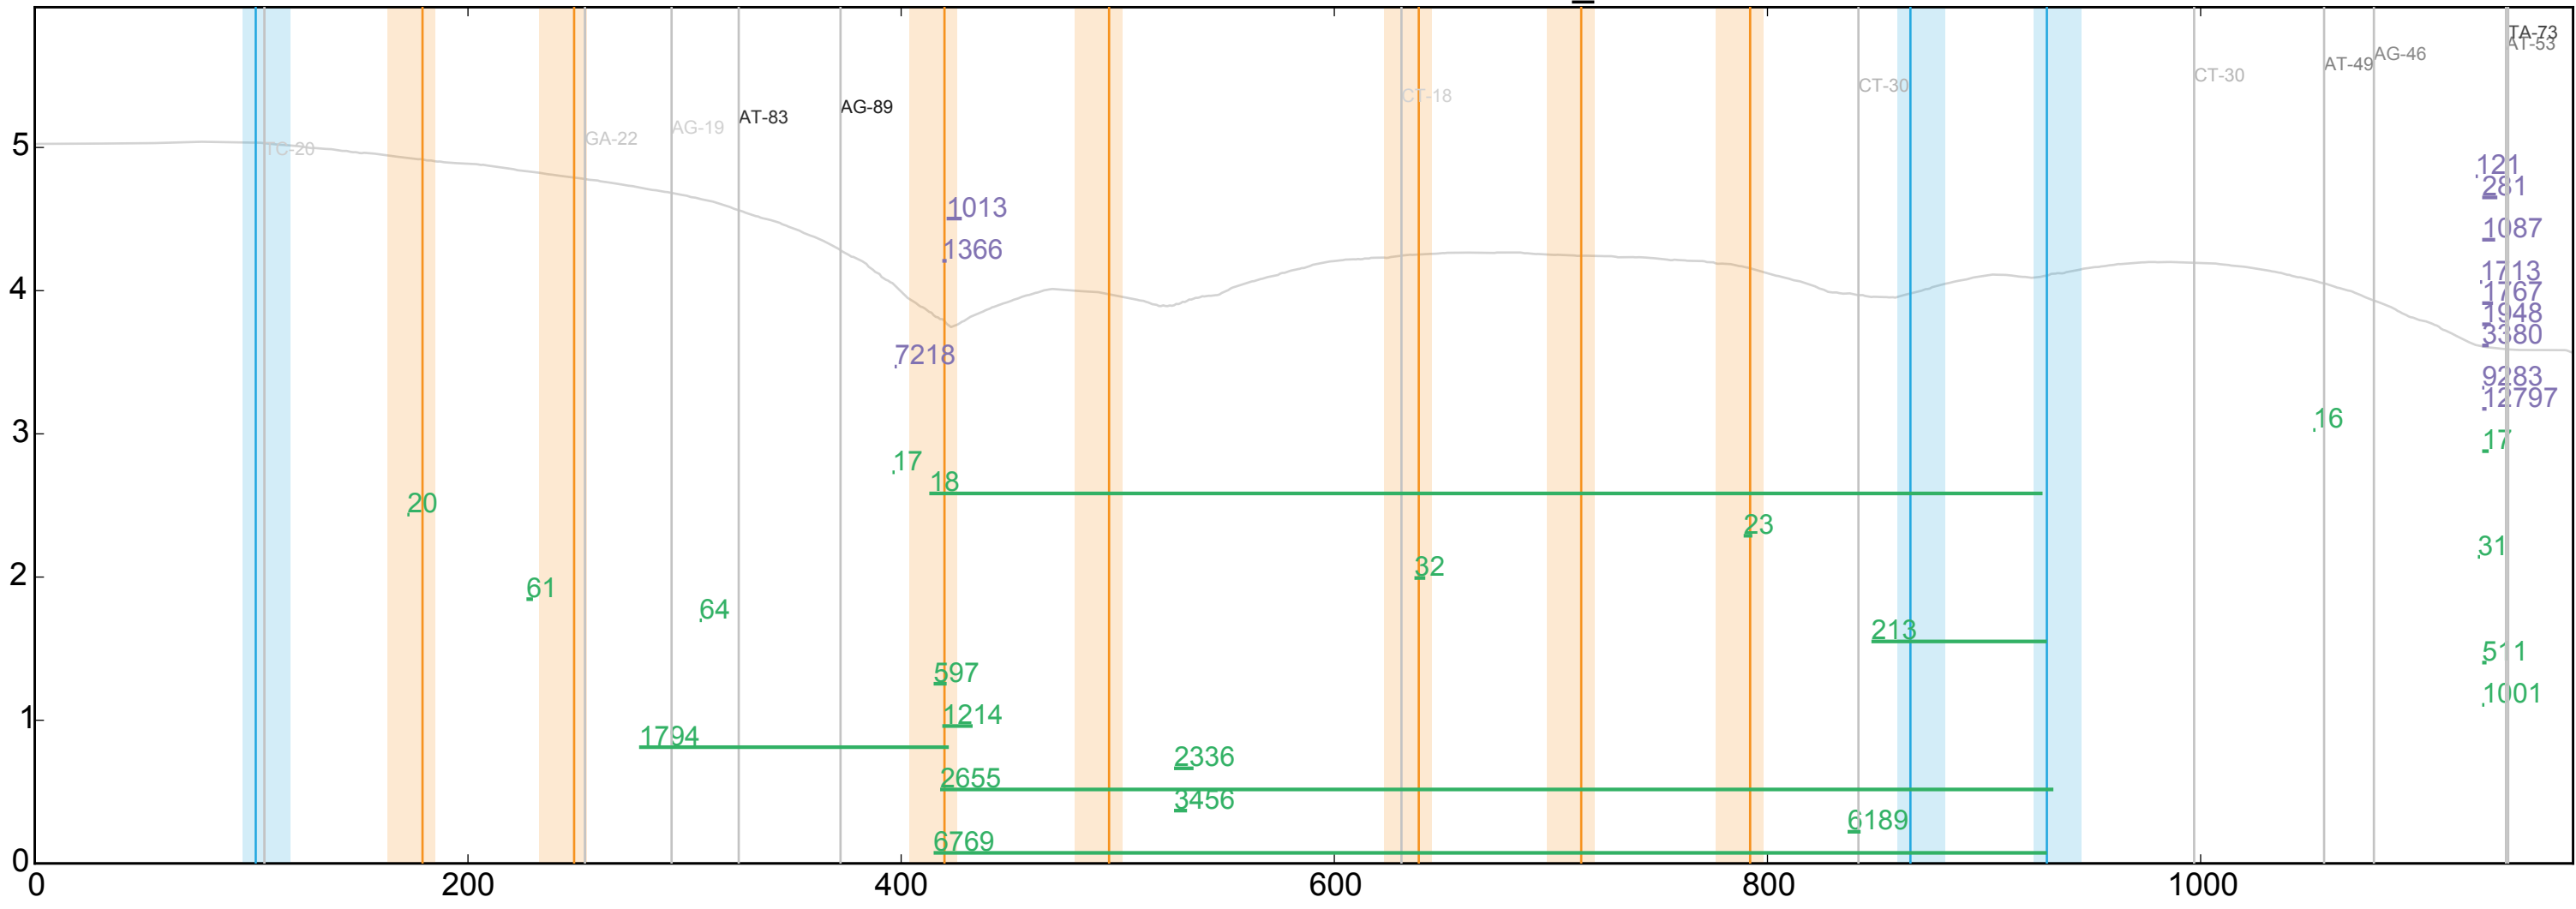

WT ENSDARG00000010873\_11

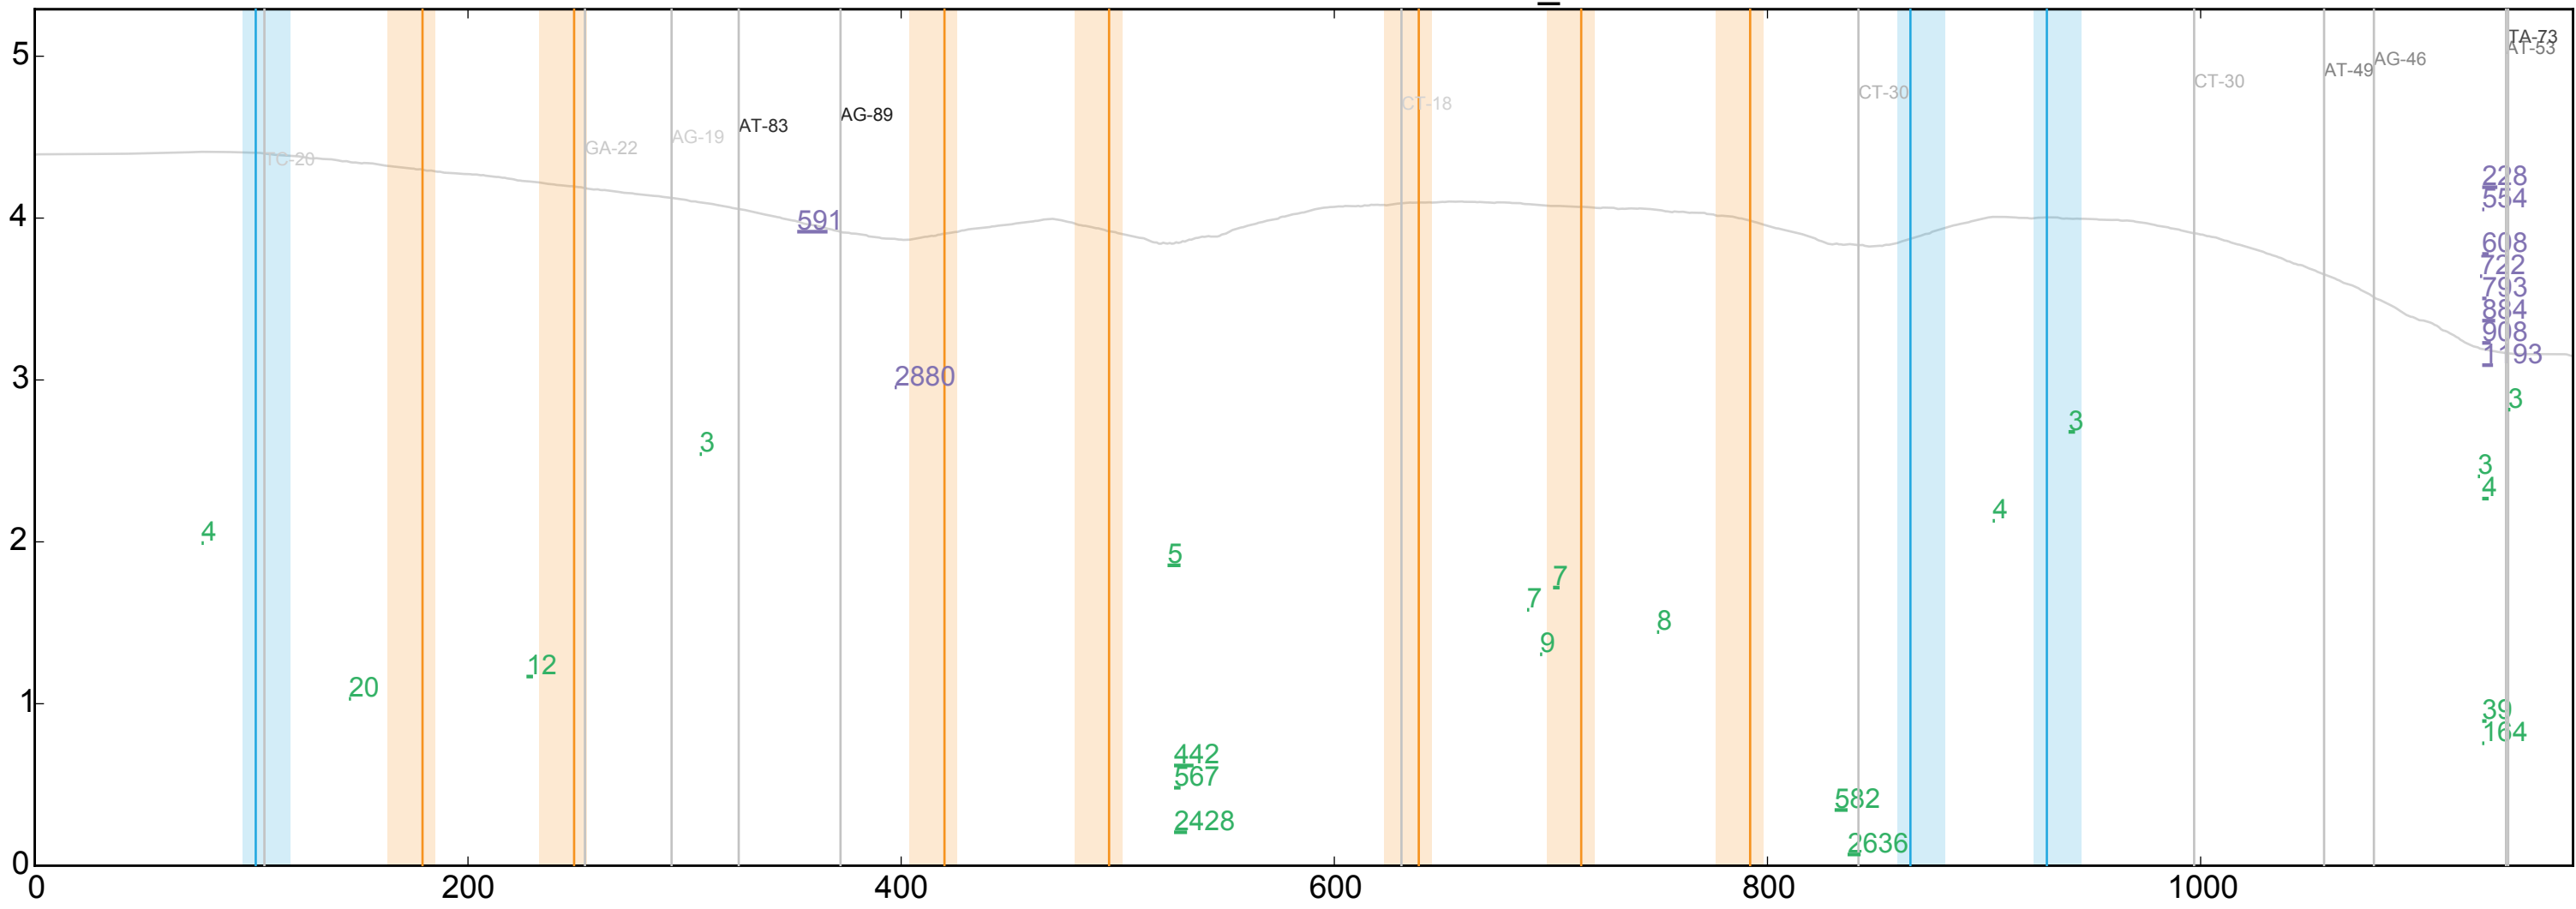

### Mutant ENSDARG00000088880\_1

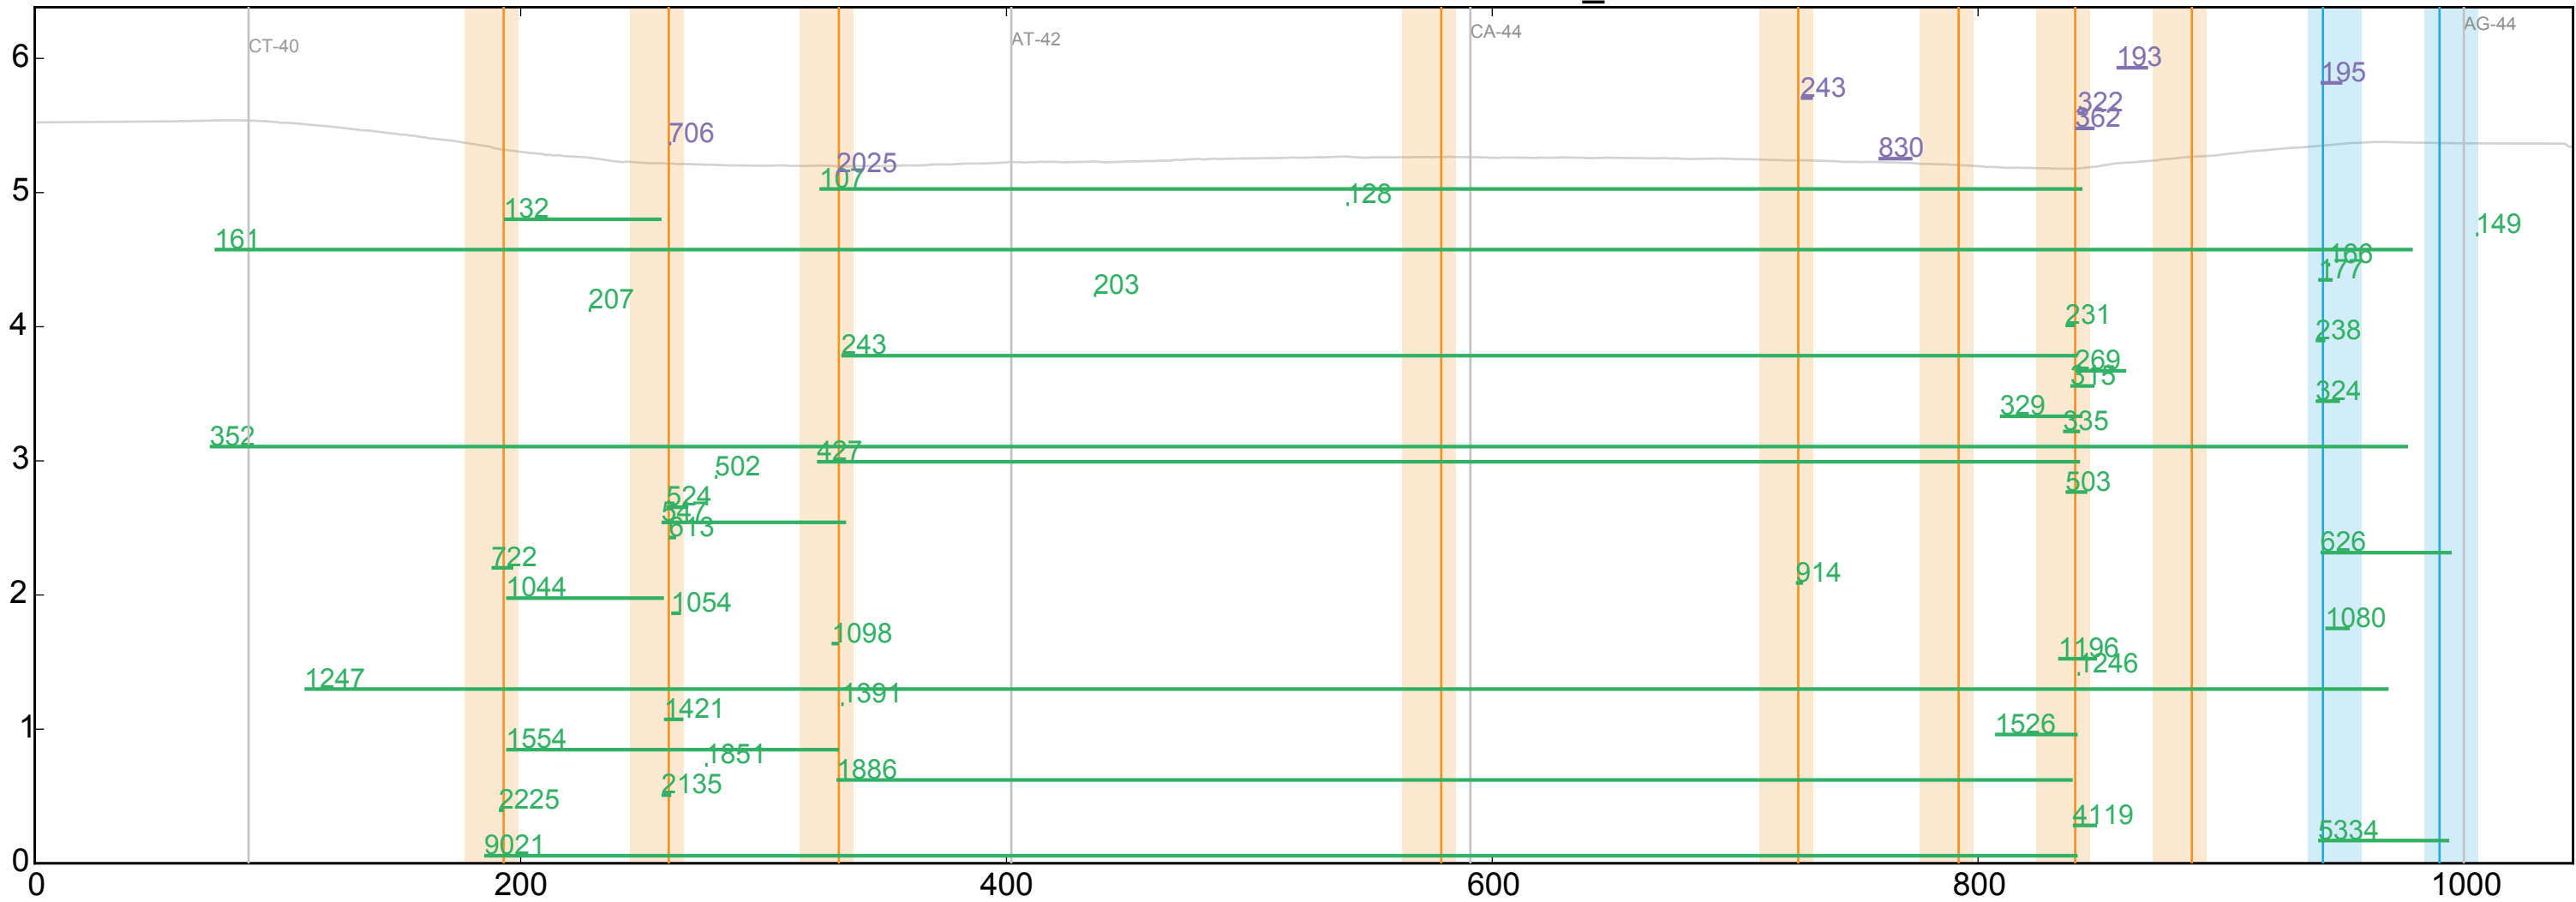

### WT ENSDARG00000088880\_1

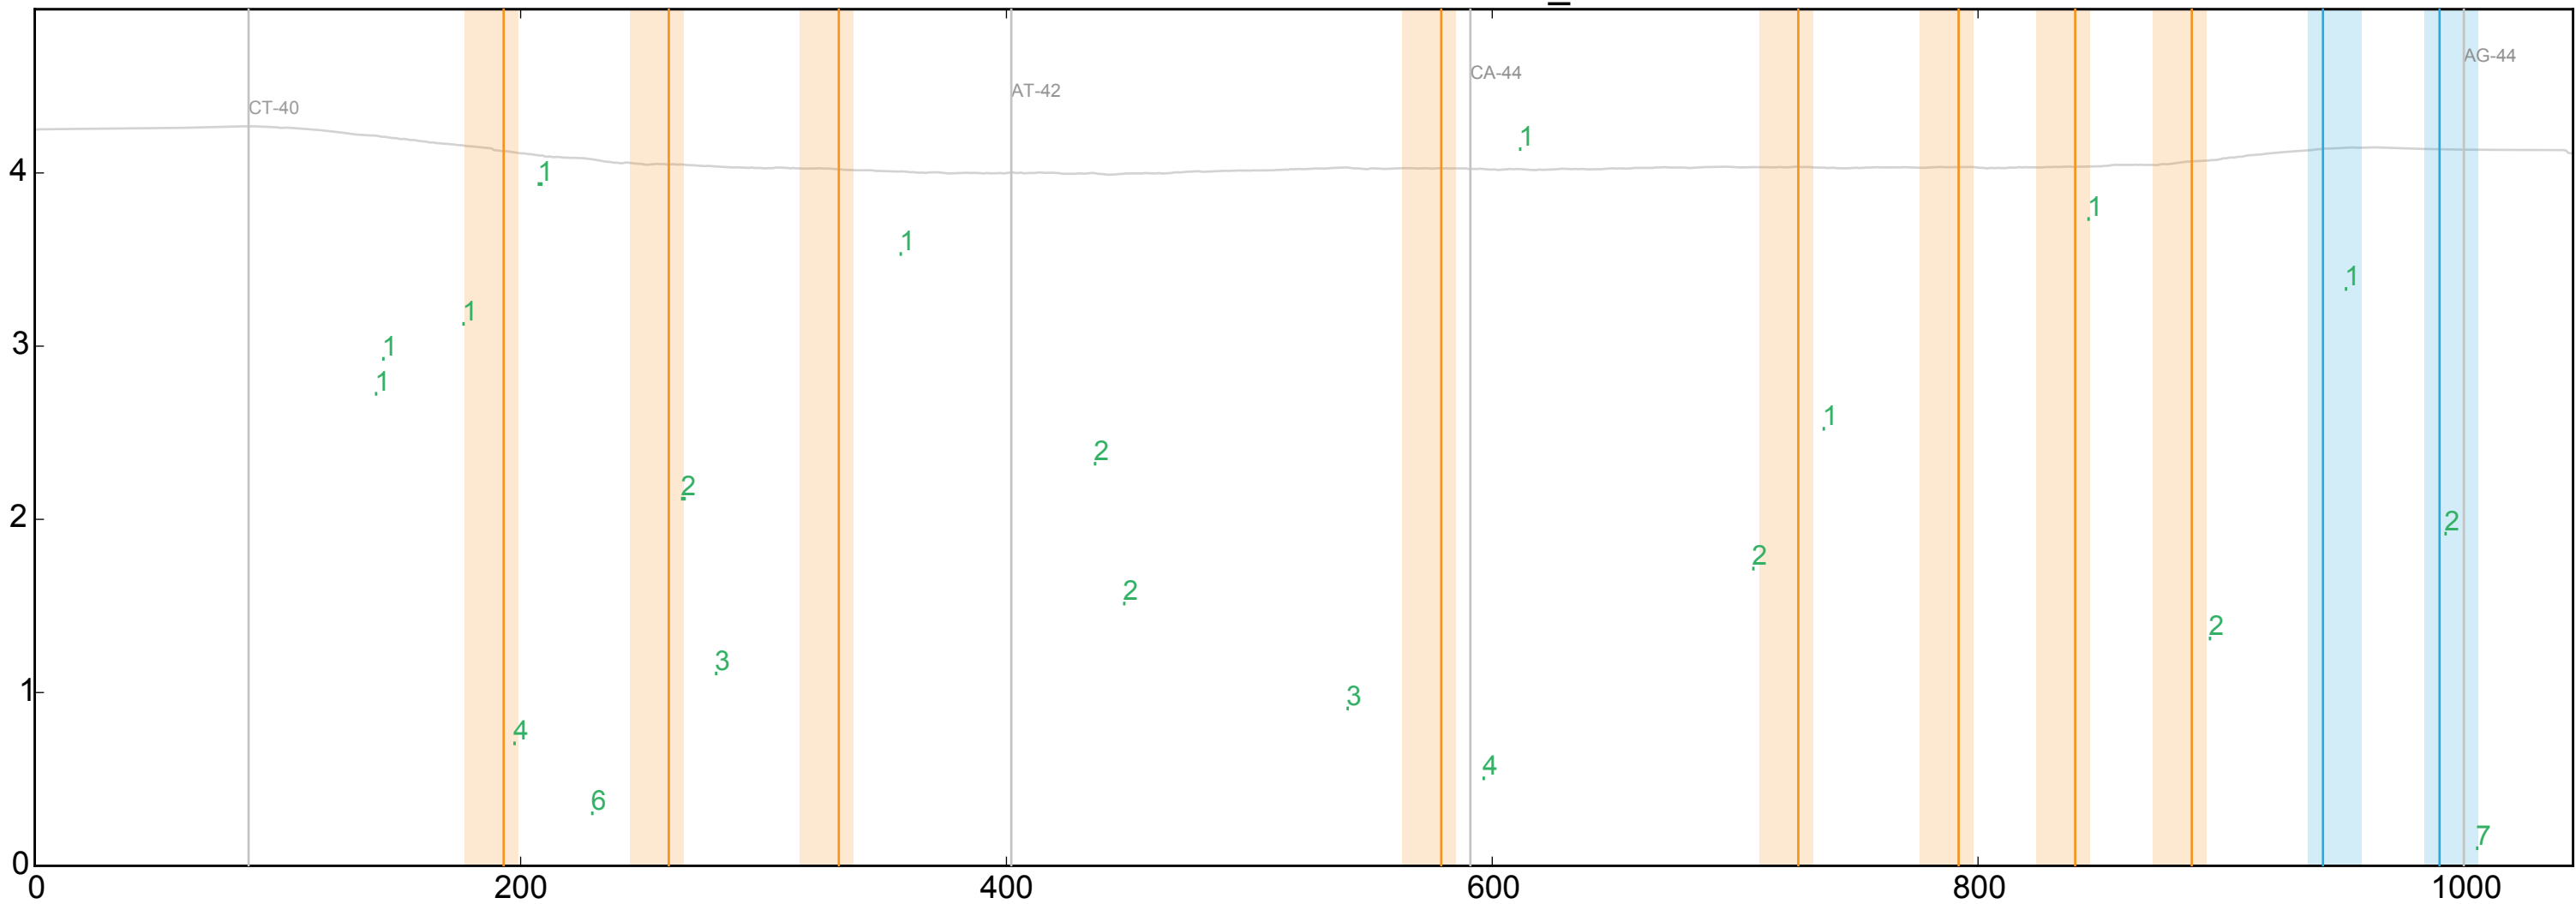

Mutant ENSDARG0000002193\_0

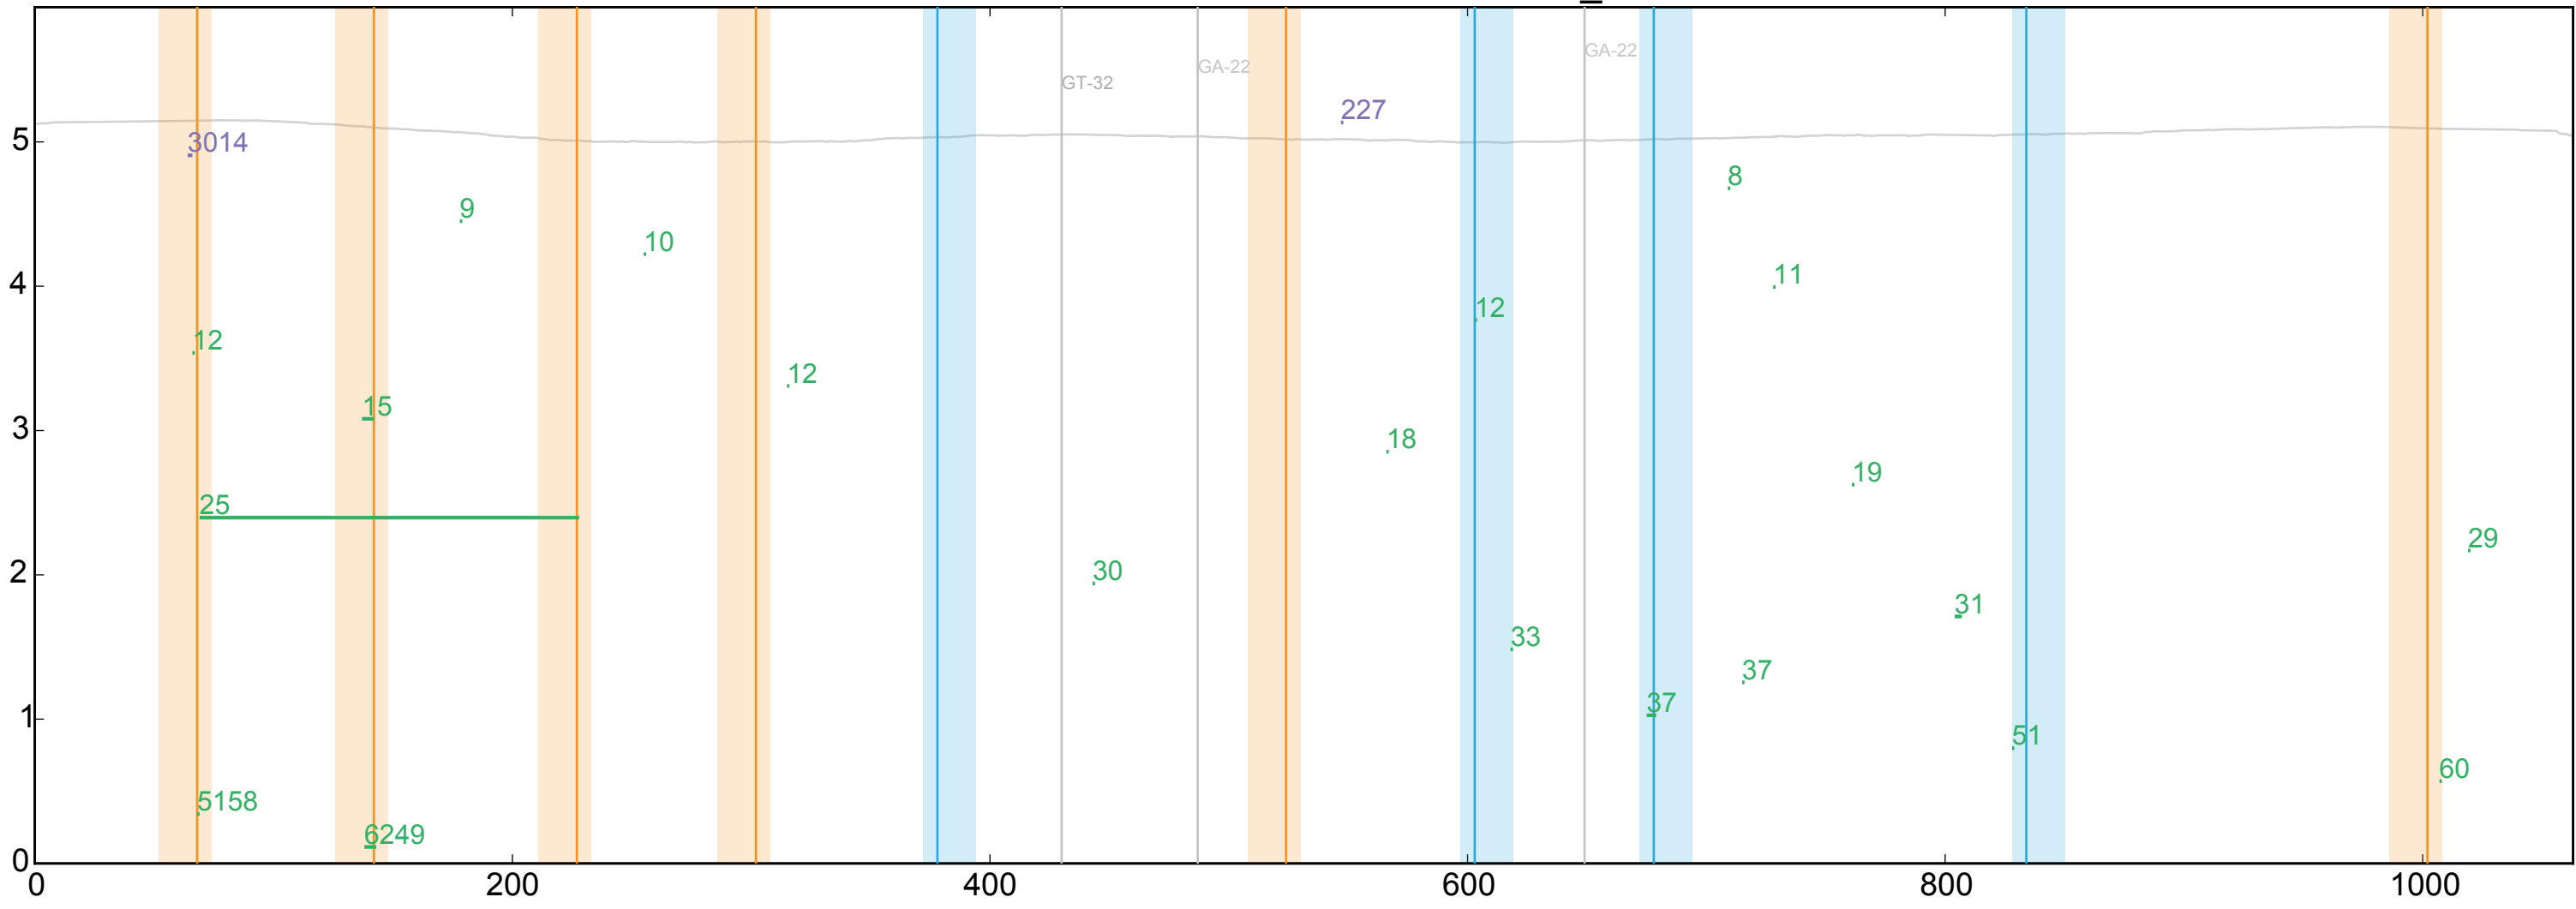

WT ENSDARG0000002193\_0

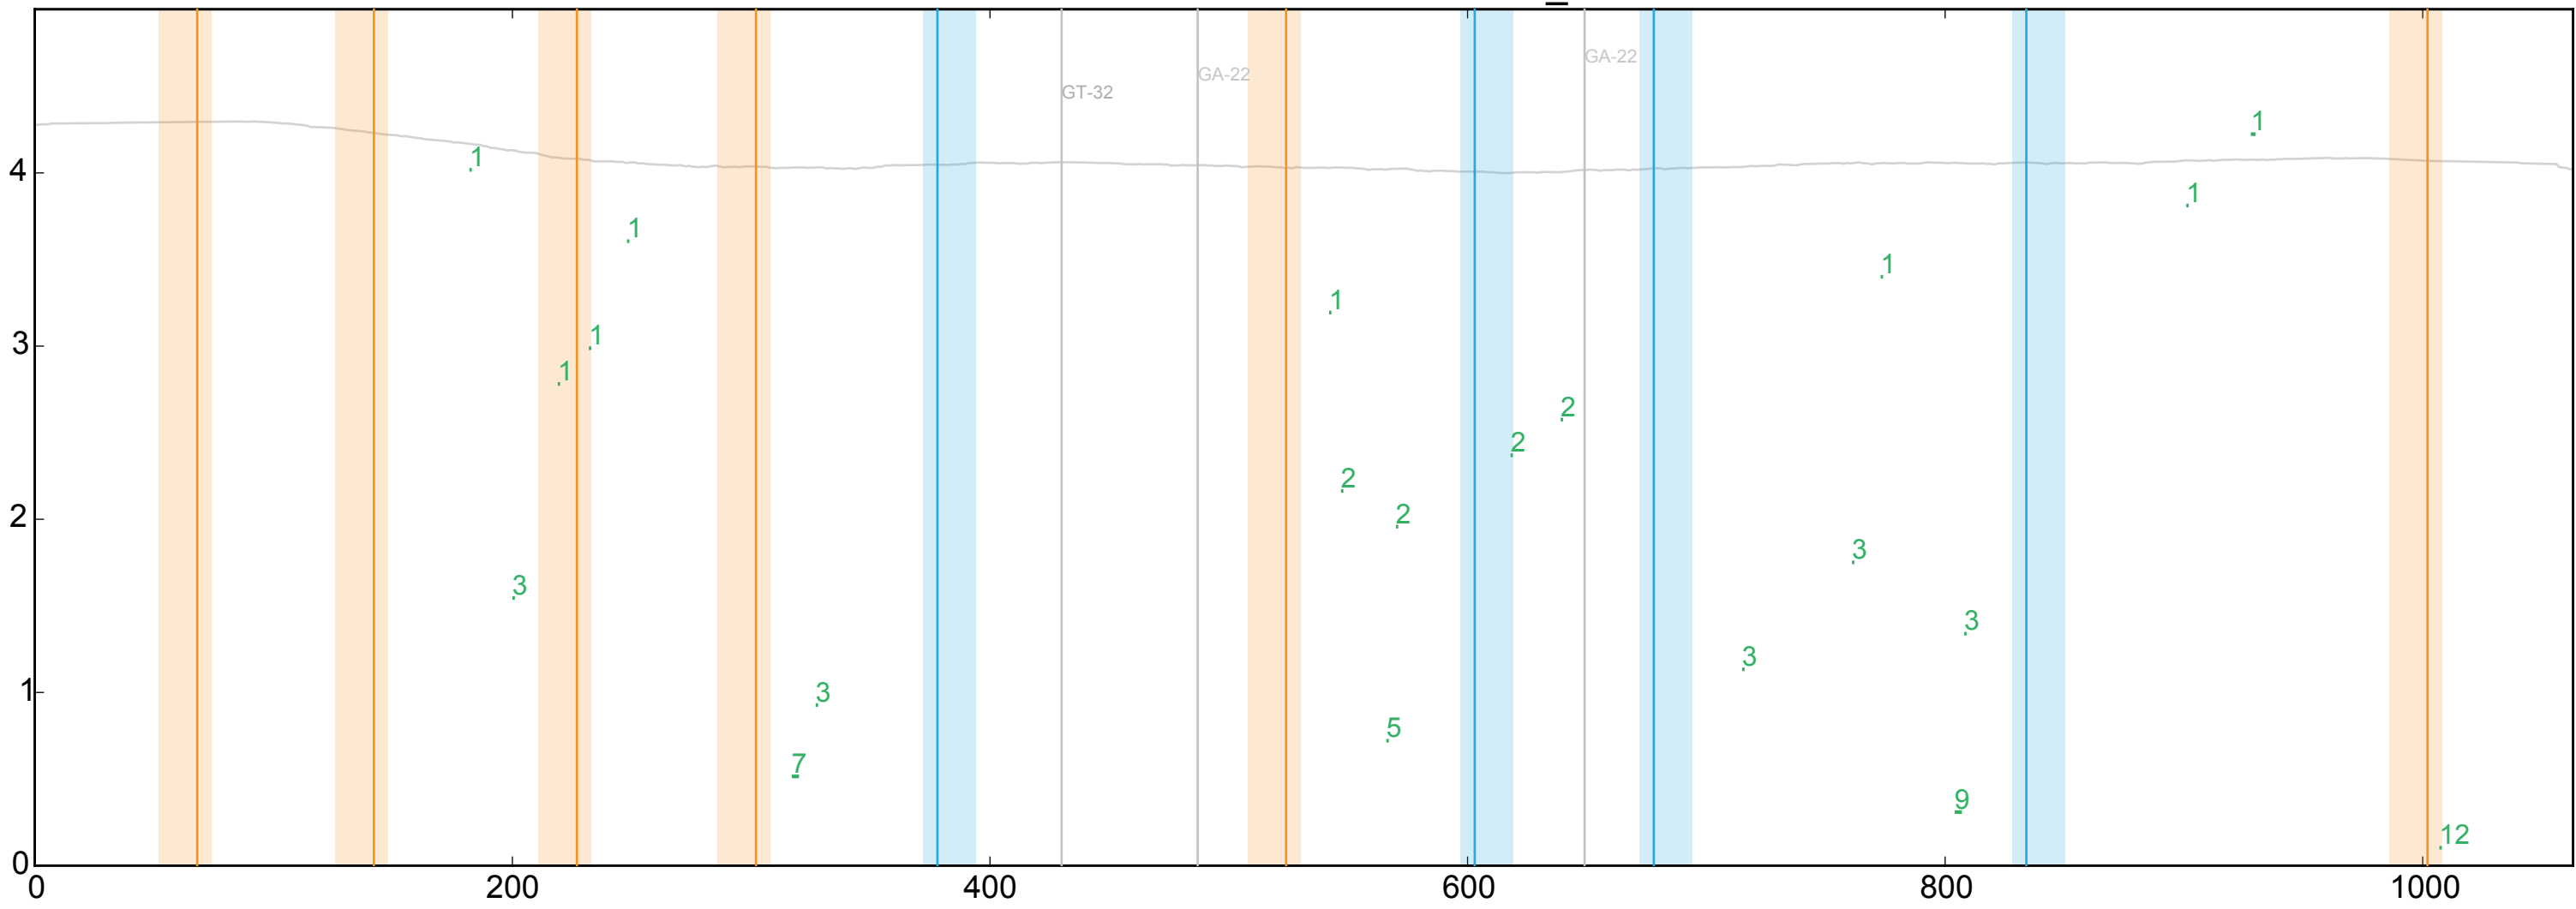

Mutant ENSDARG00000077842\_7

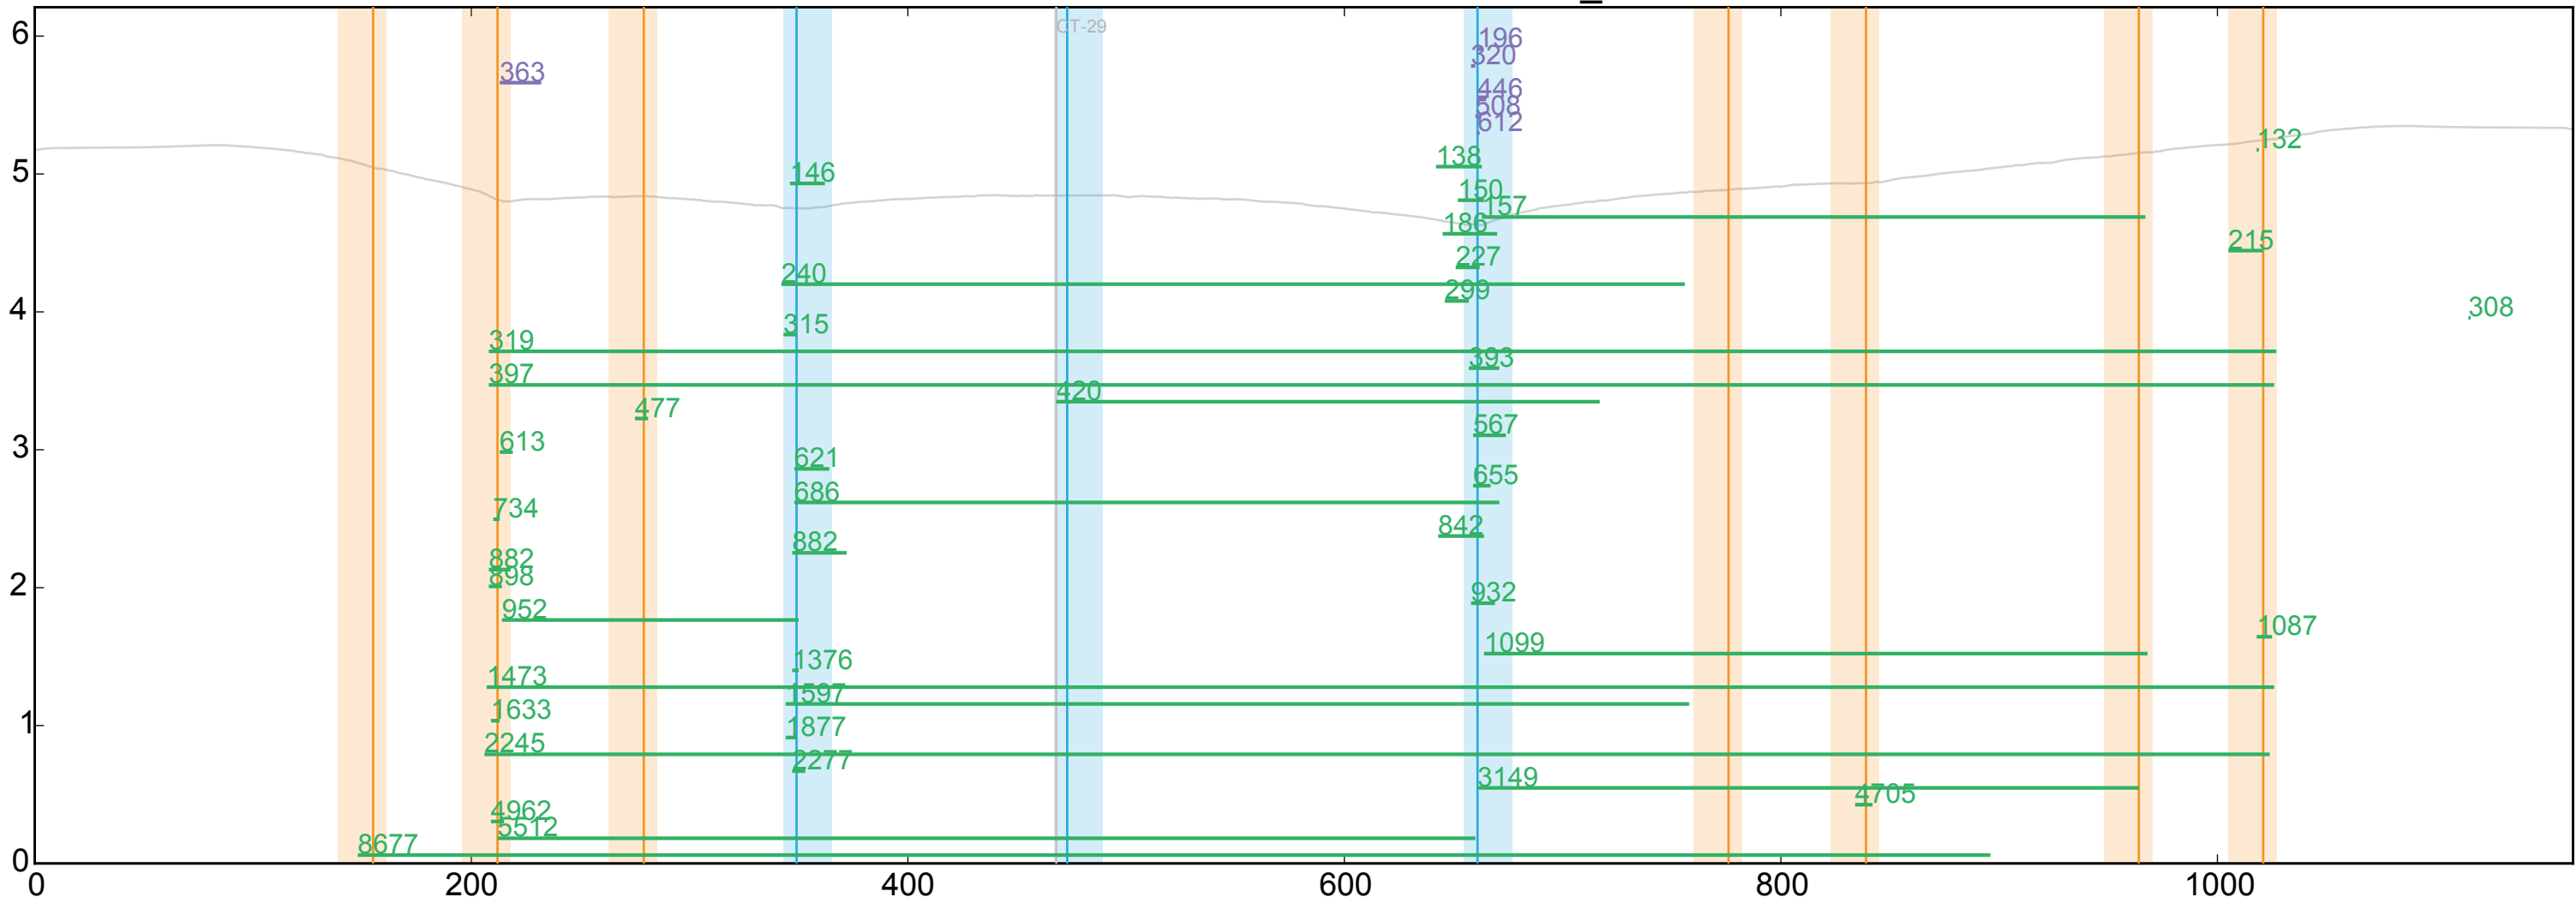

WT ENSDARG00000077842\_7

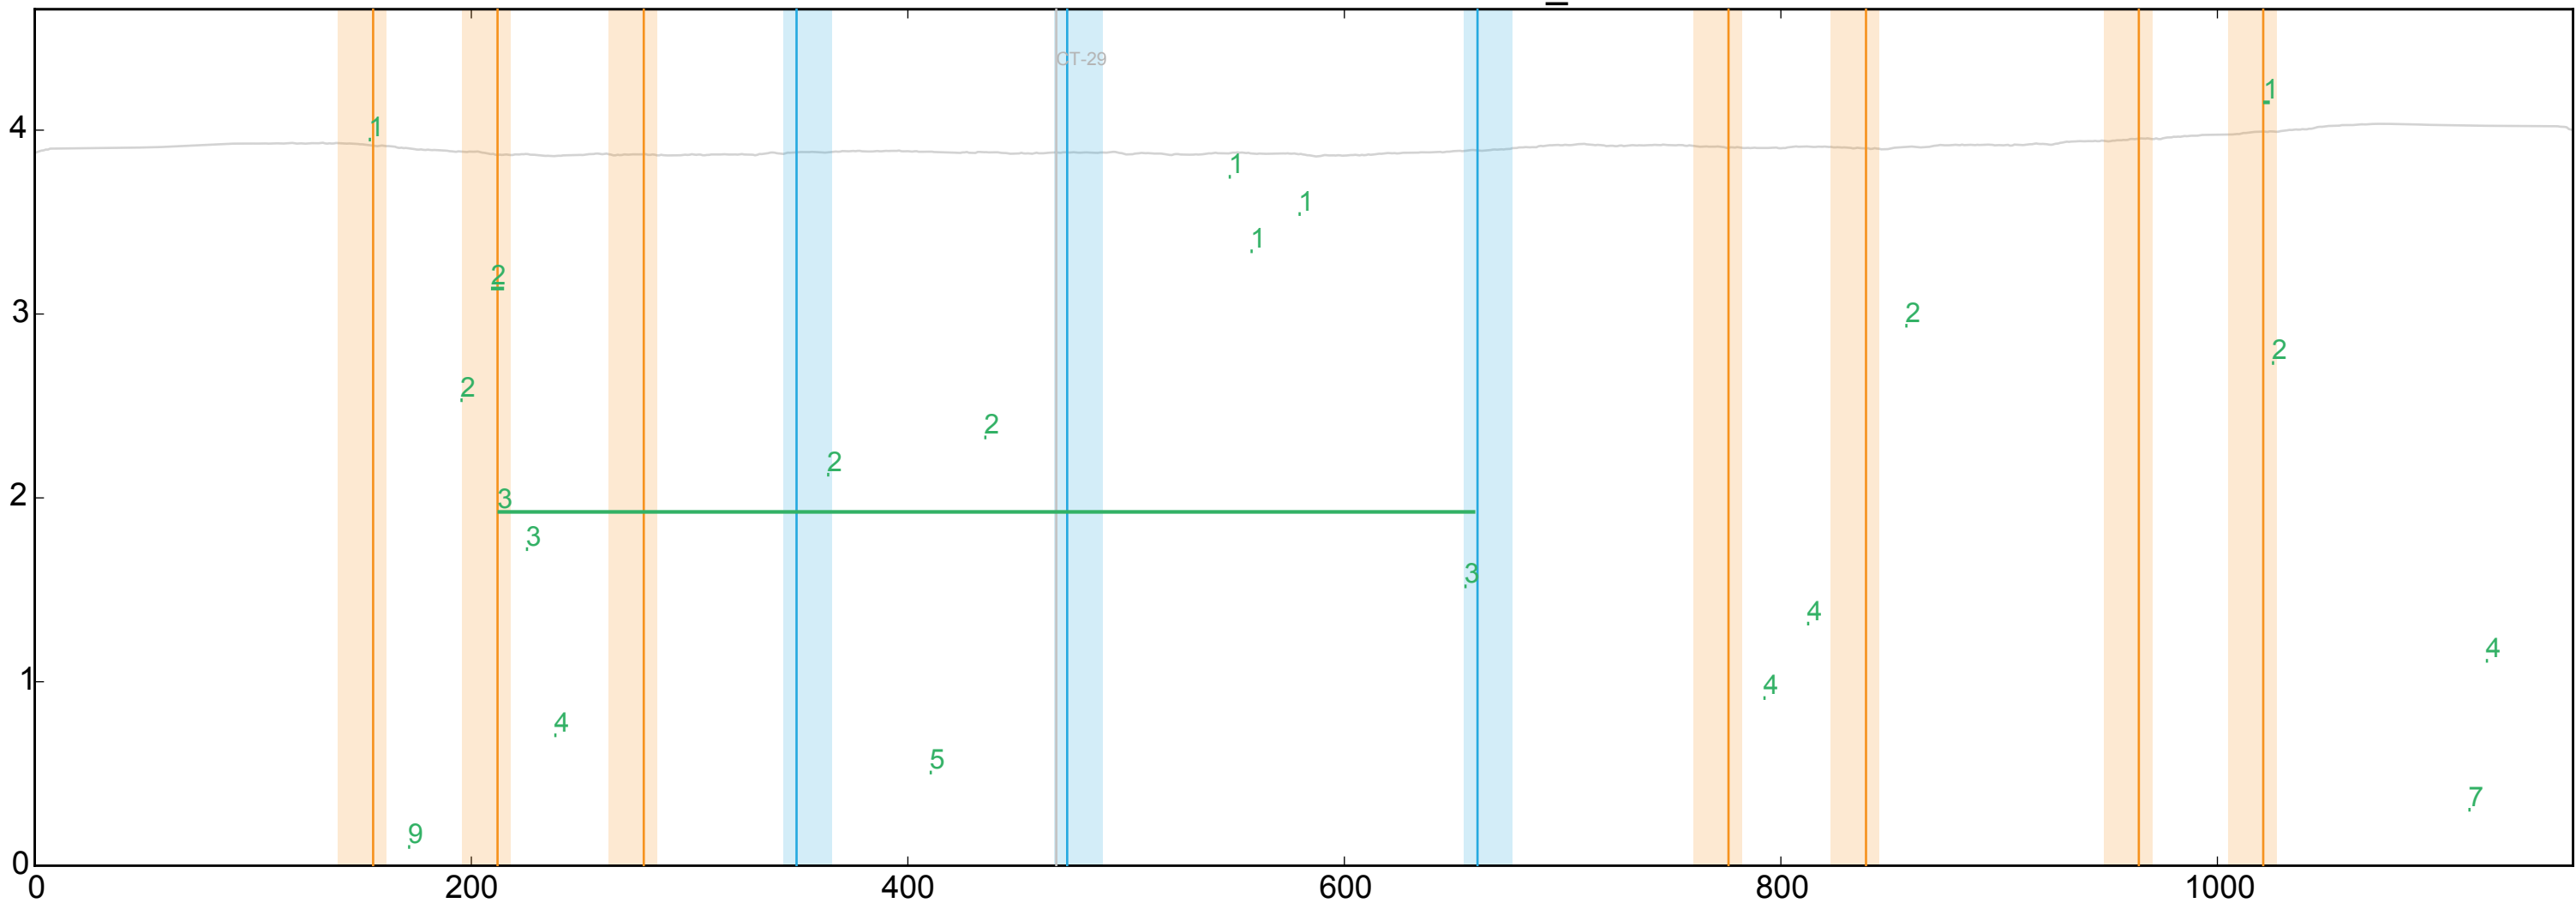

Mutant ENSDARG00000063332\_1

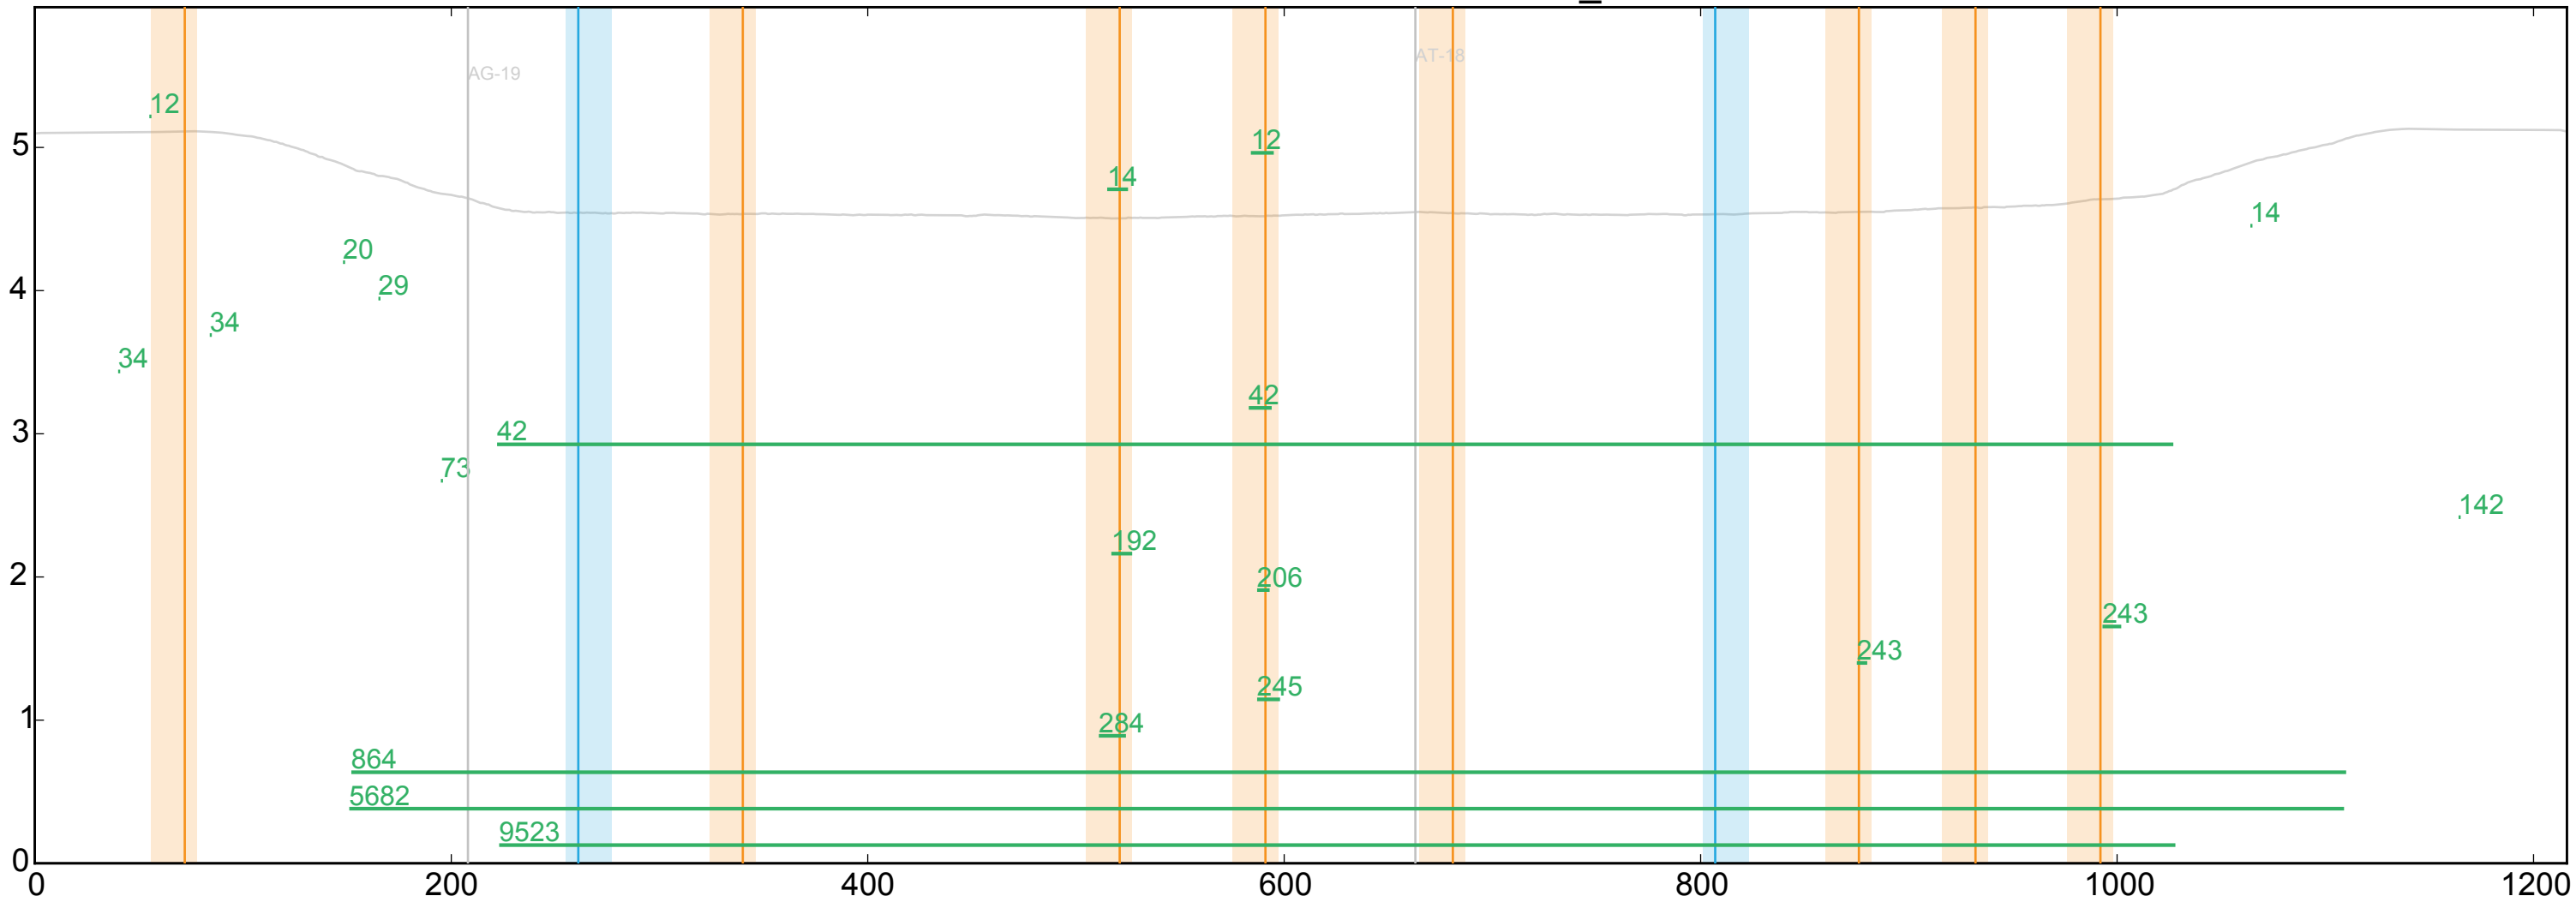

WT ENSDARG00000063332\_1

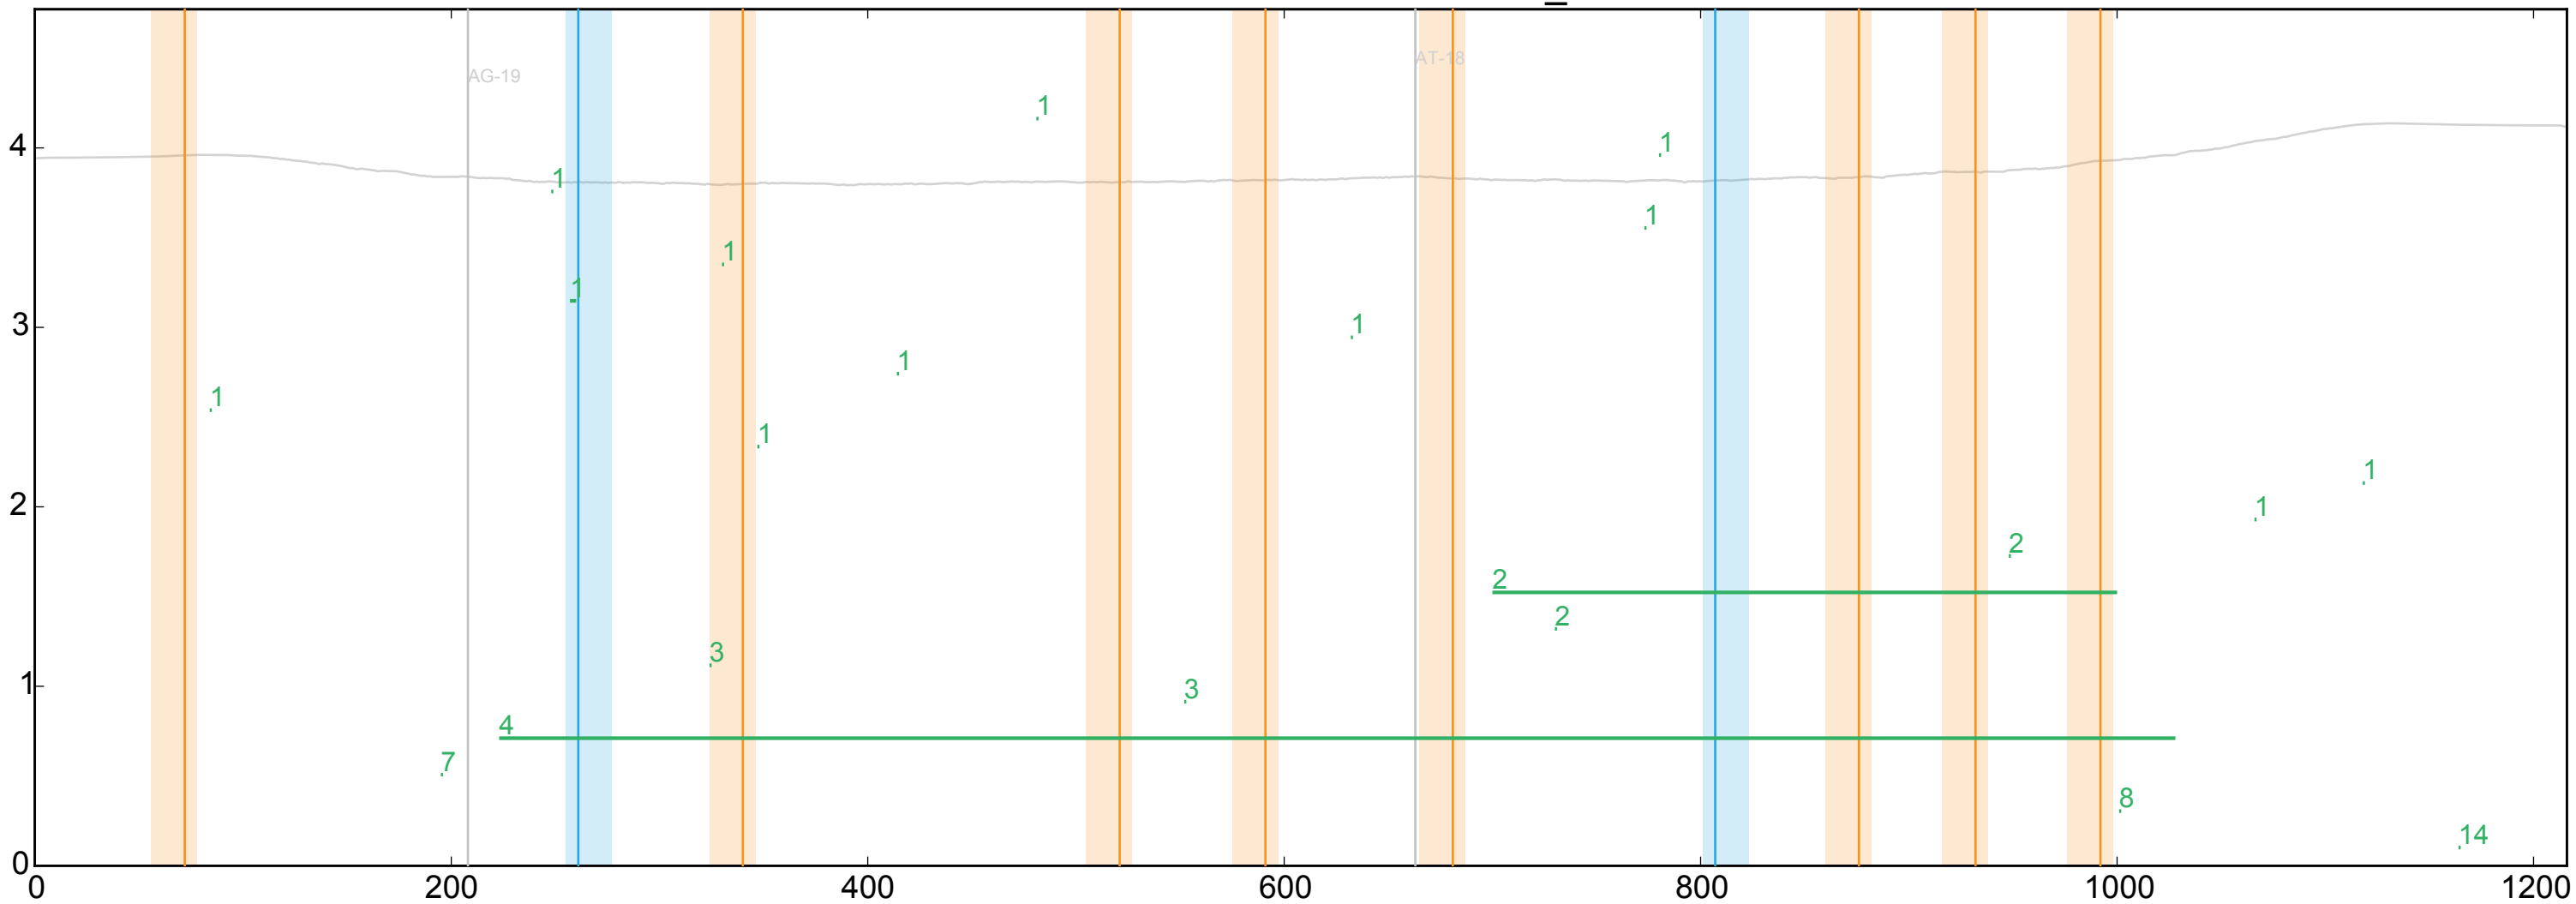



Mutant ENSDARG00000007490\_0

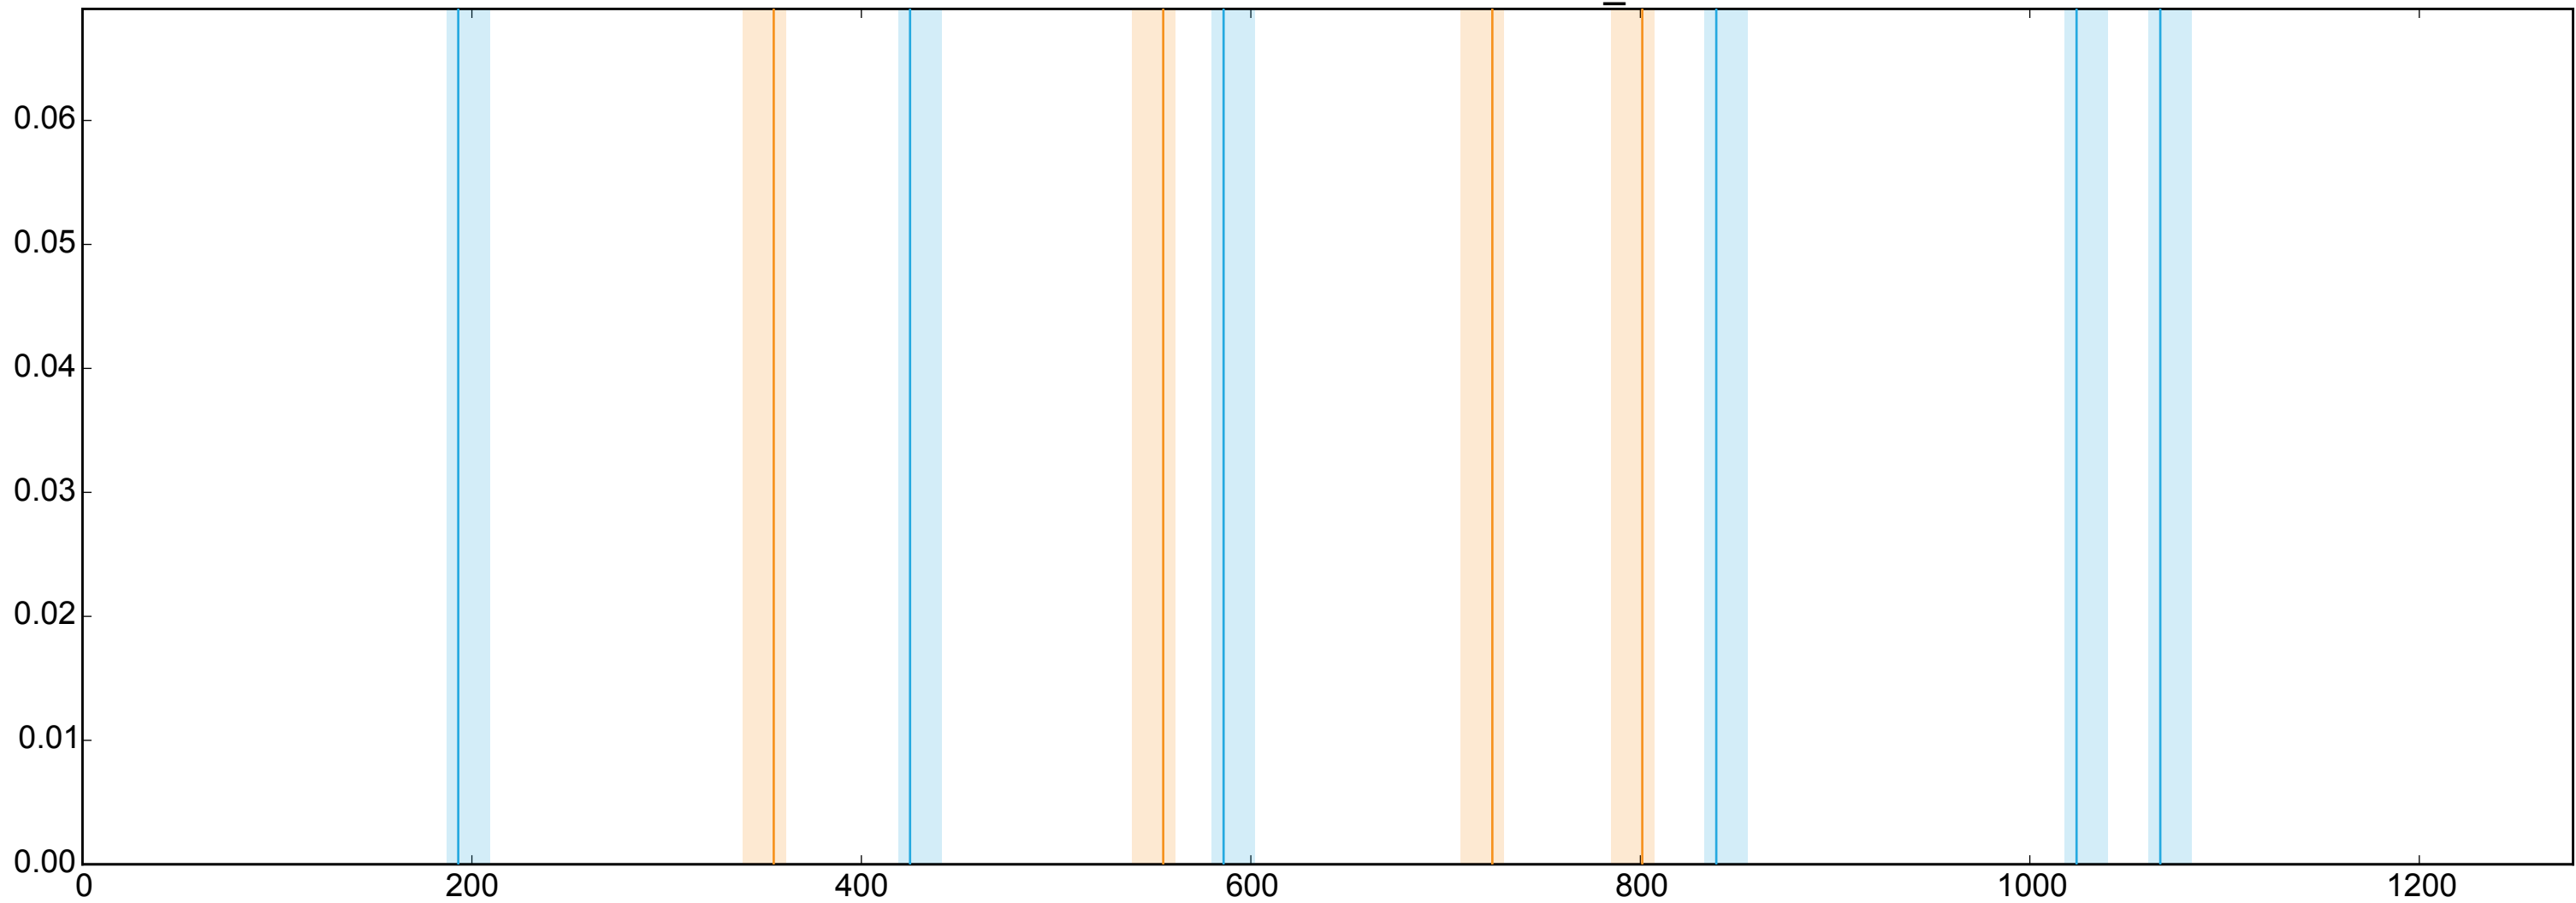

WT ENSDARG00000007490\_0

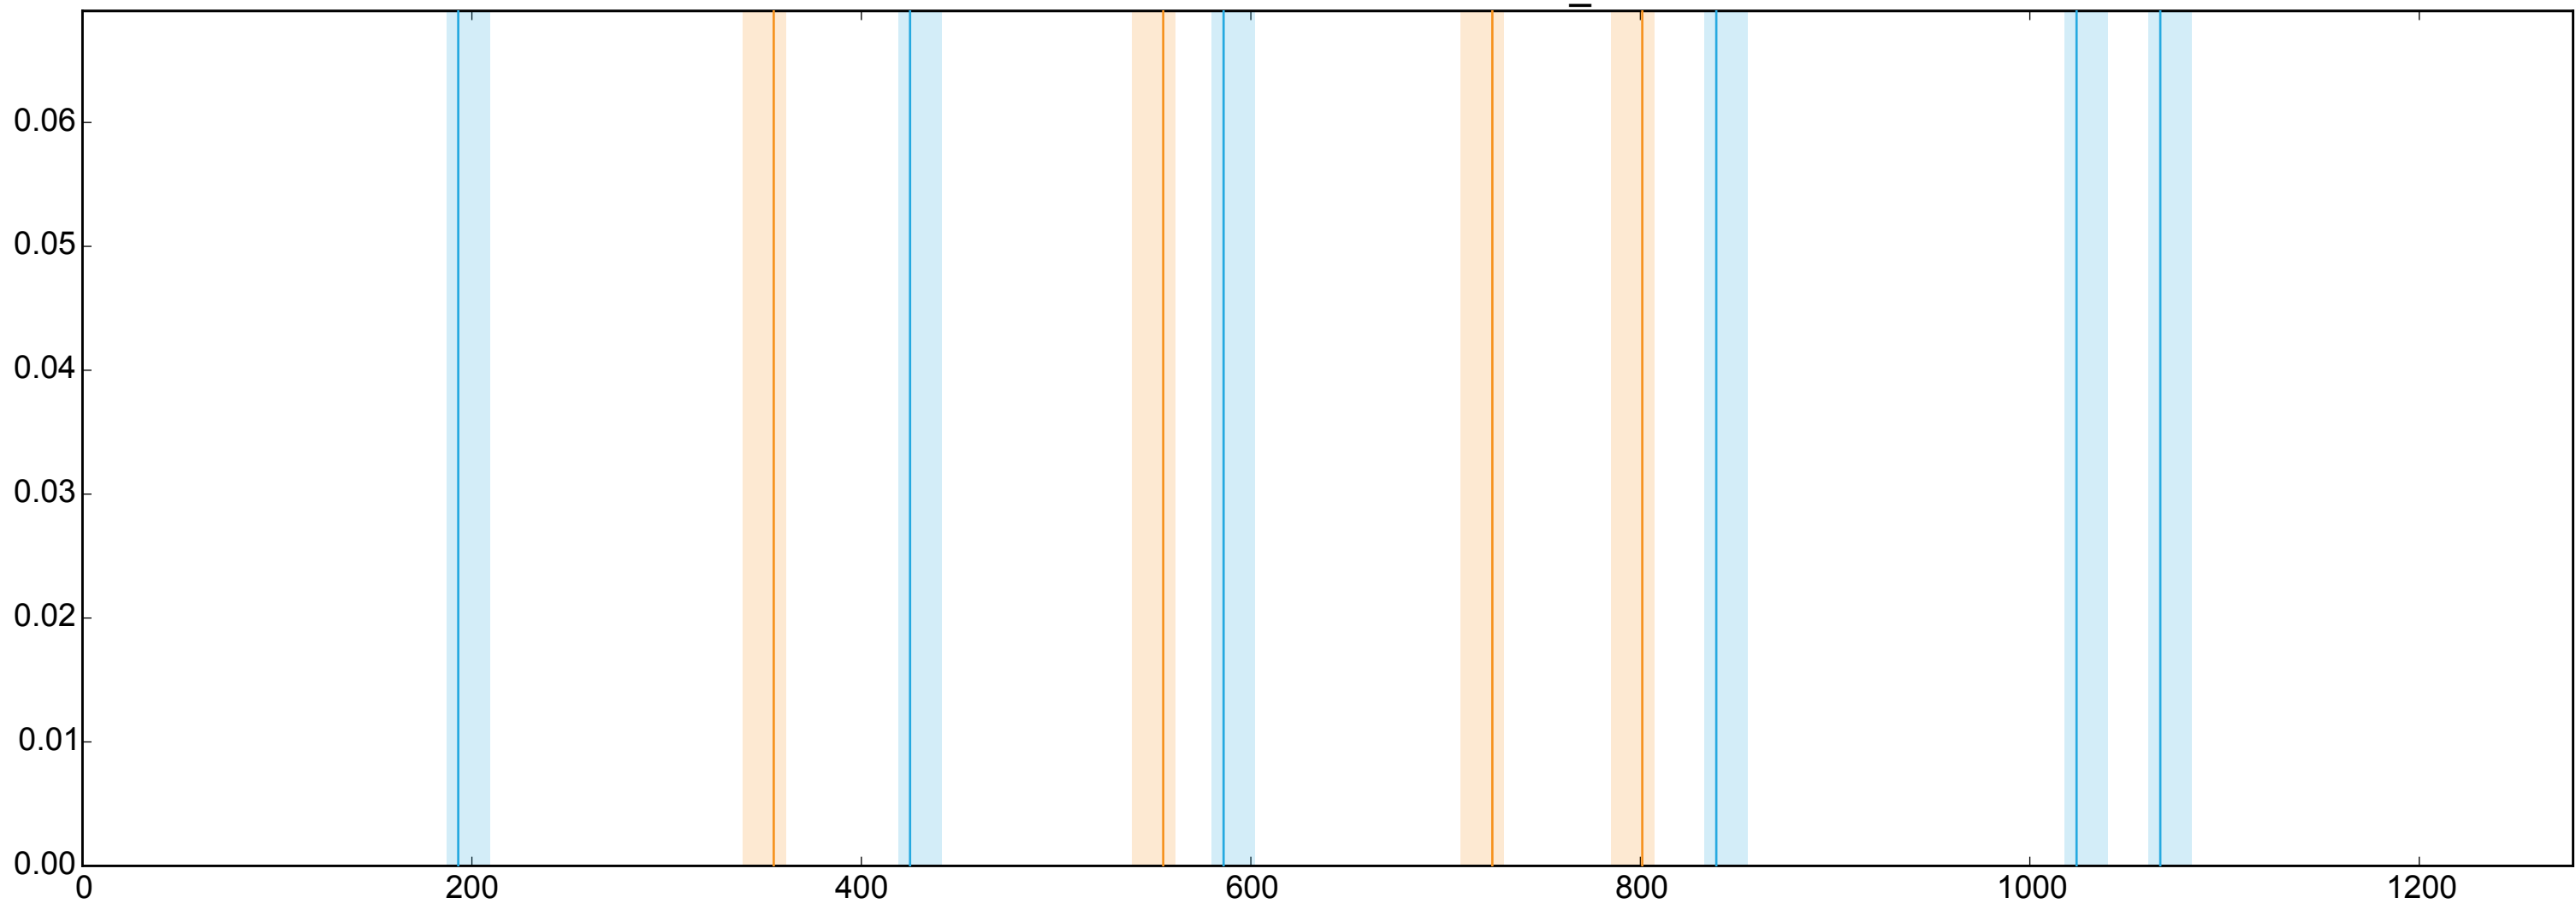

Mutant ENSDARG00000075281\_0

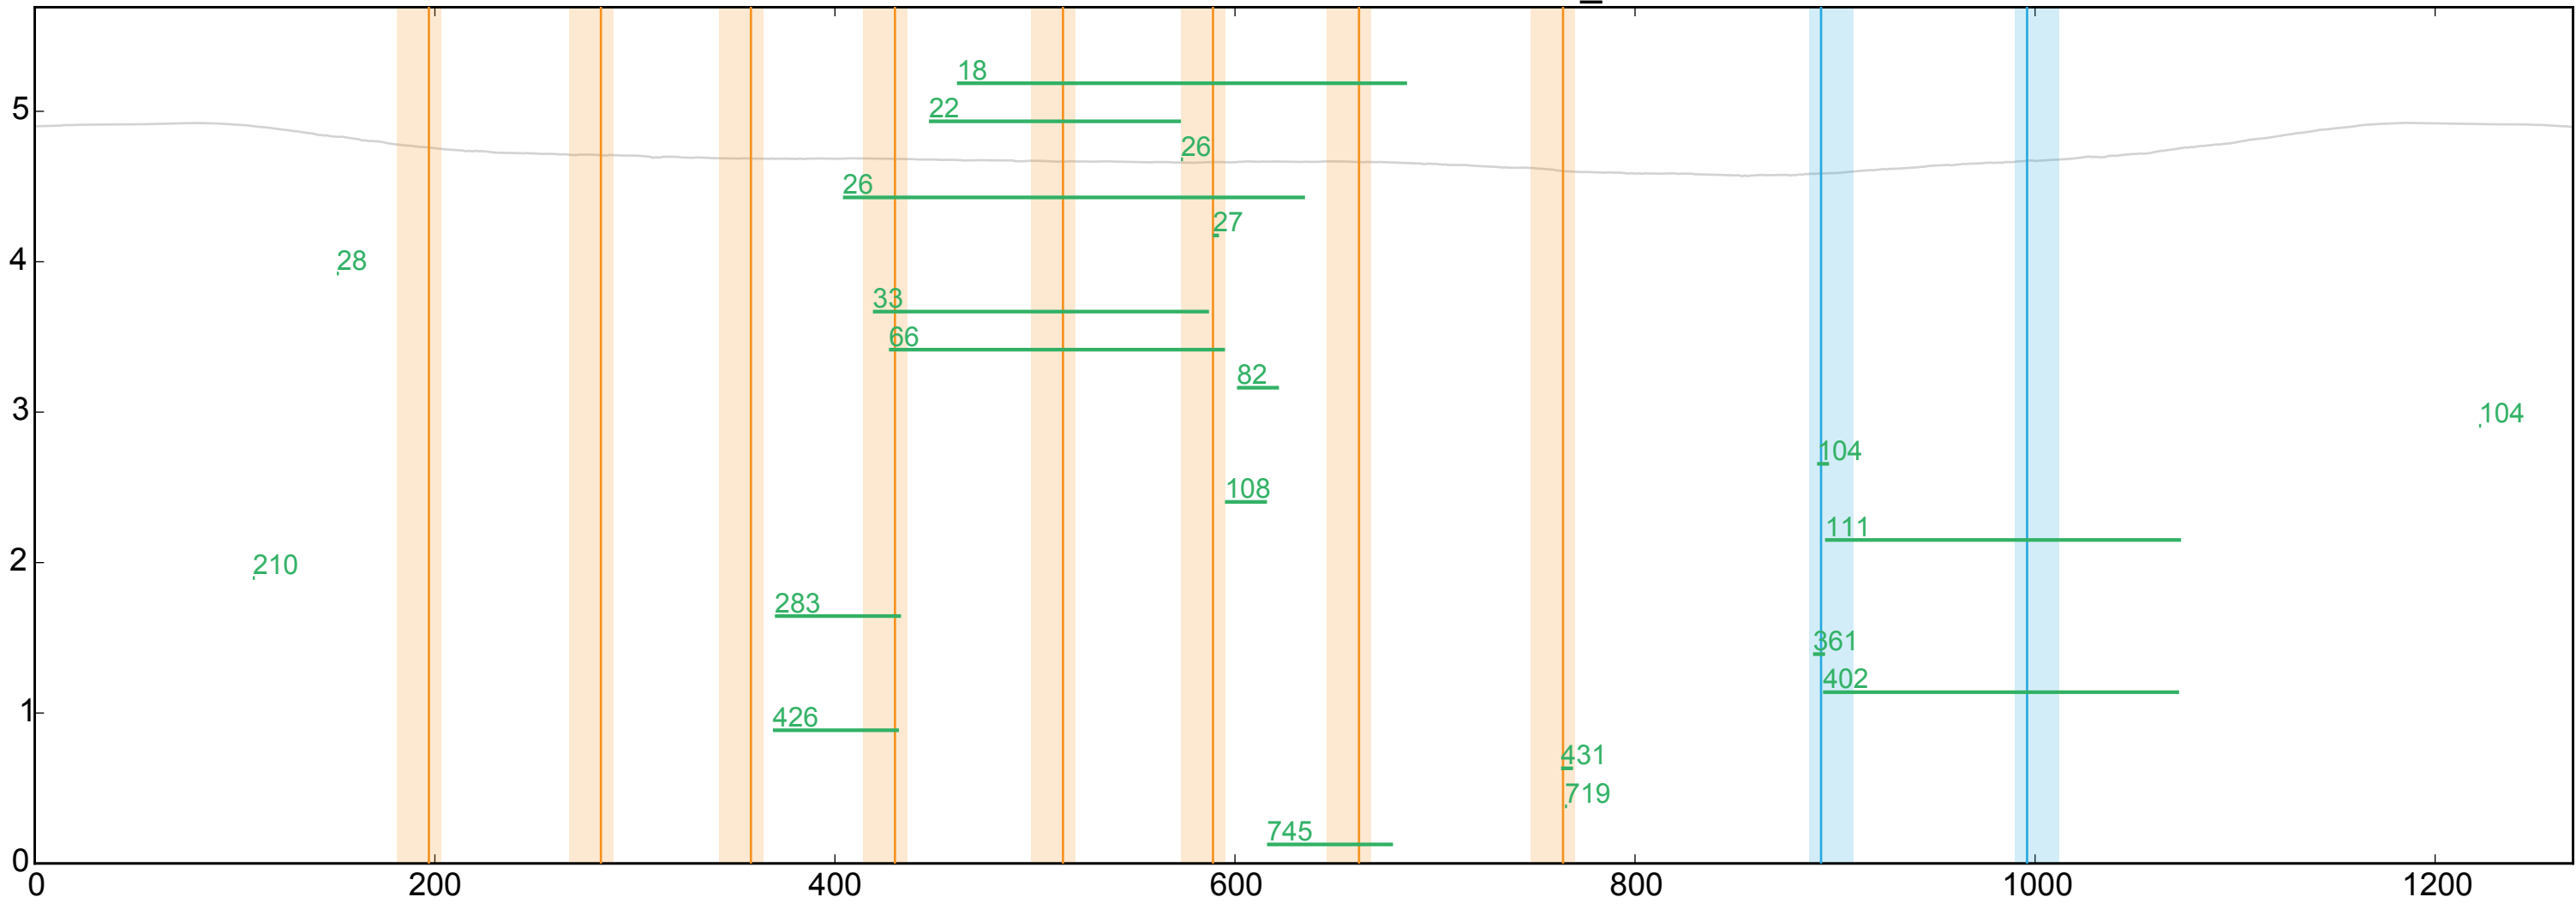

WT ENSDARG00000075281\_0

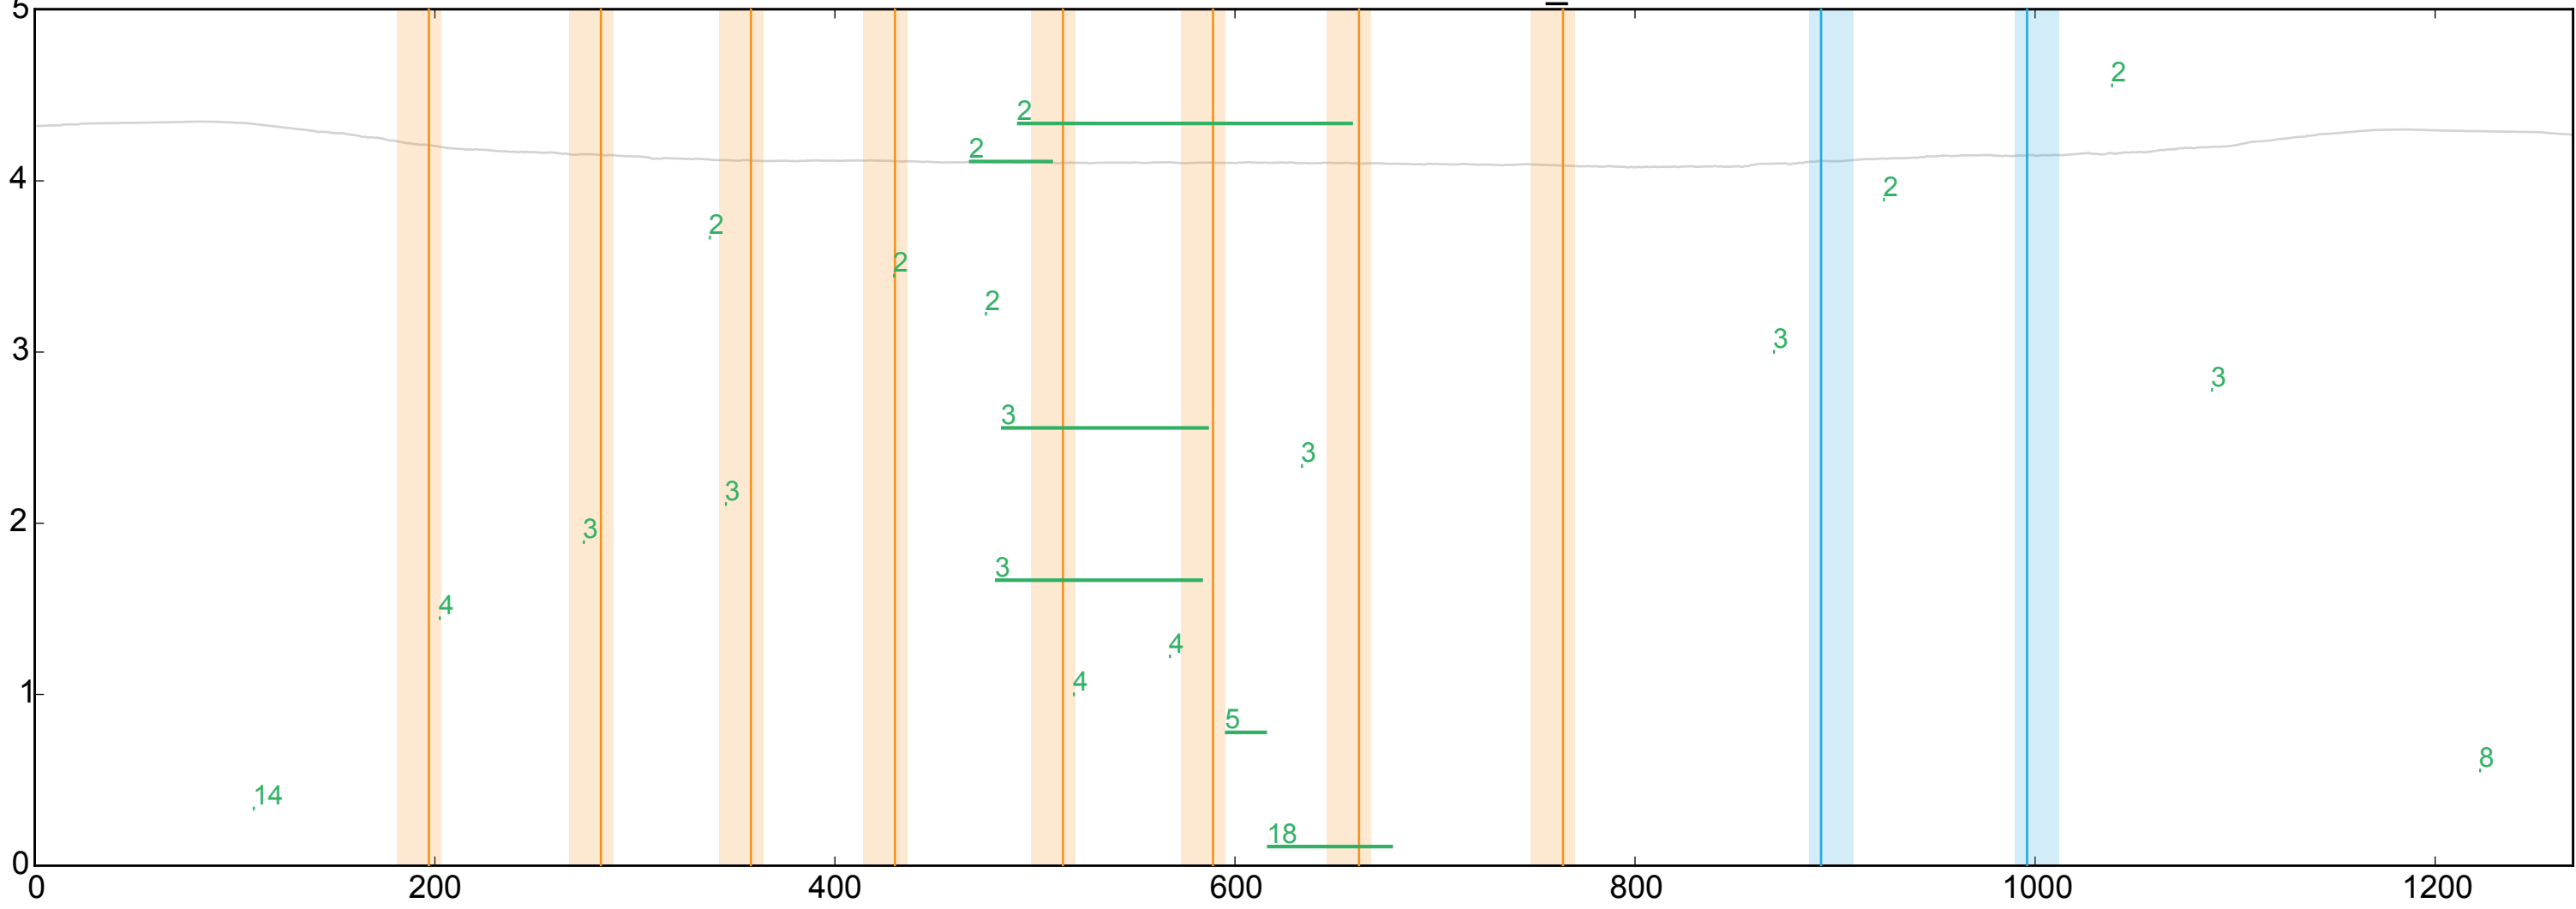

Mutant ENSDARG00000010770\_1

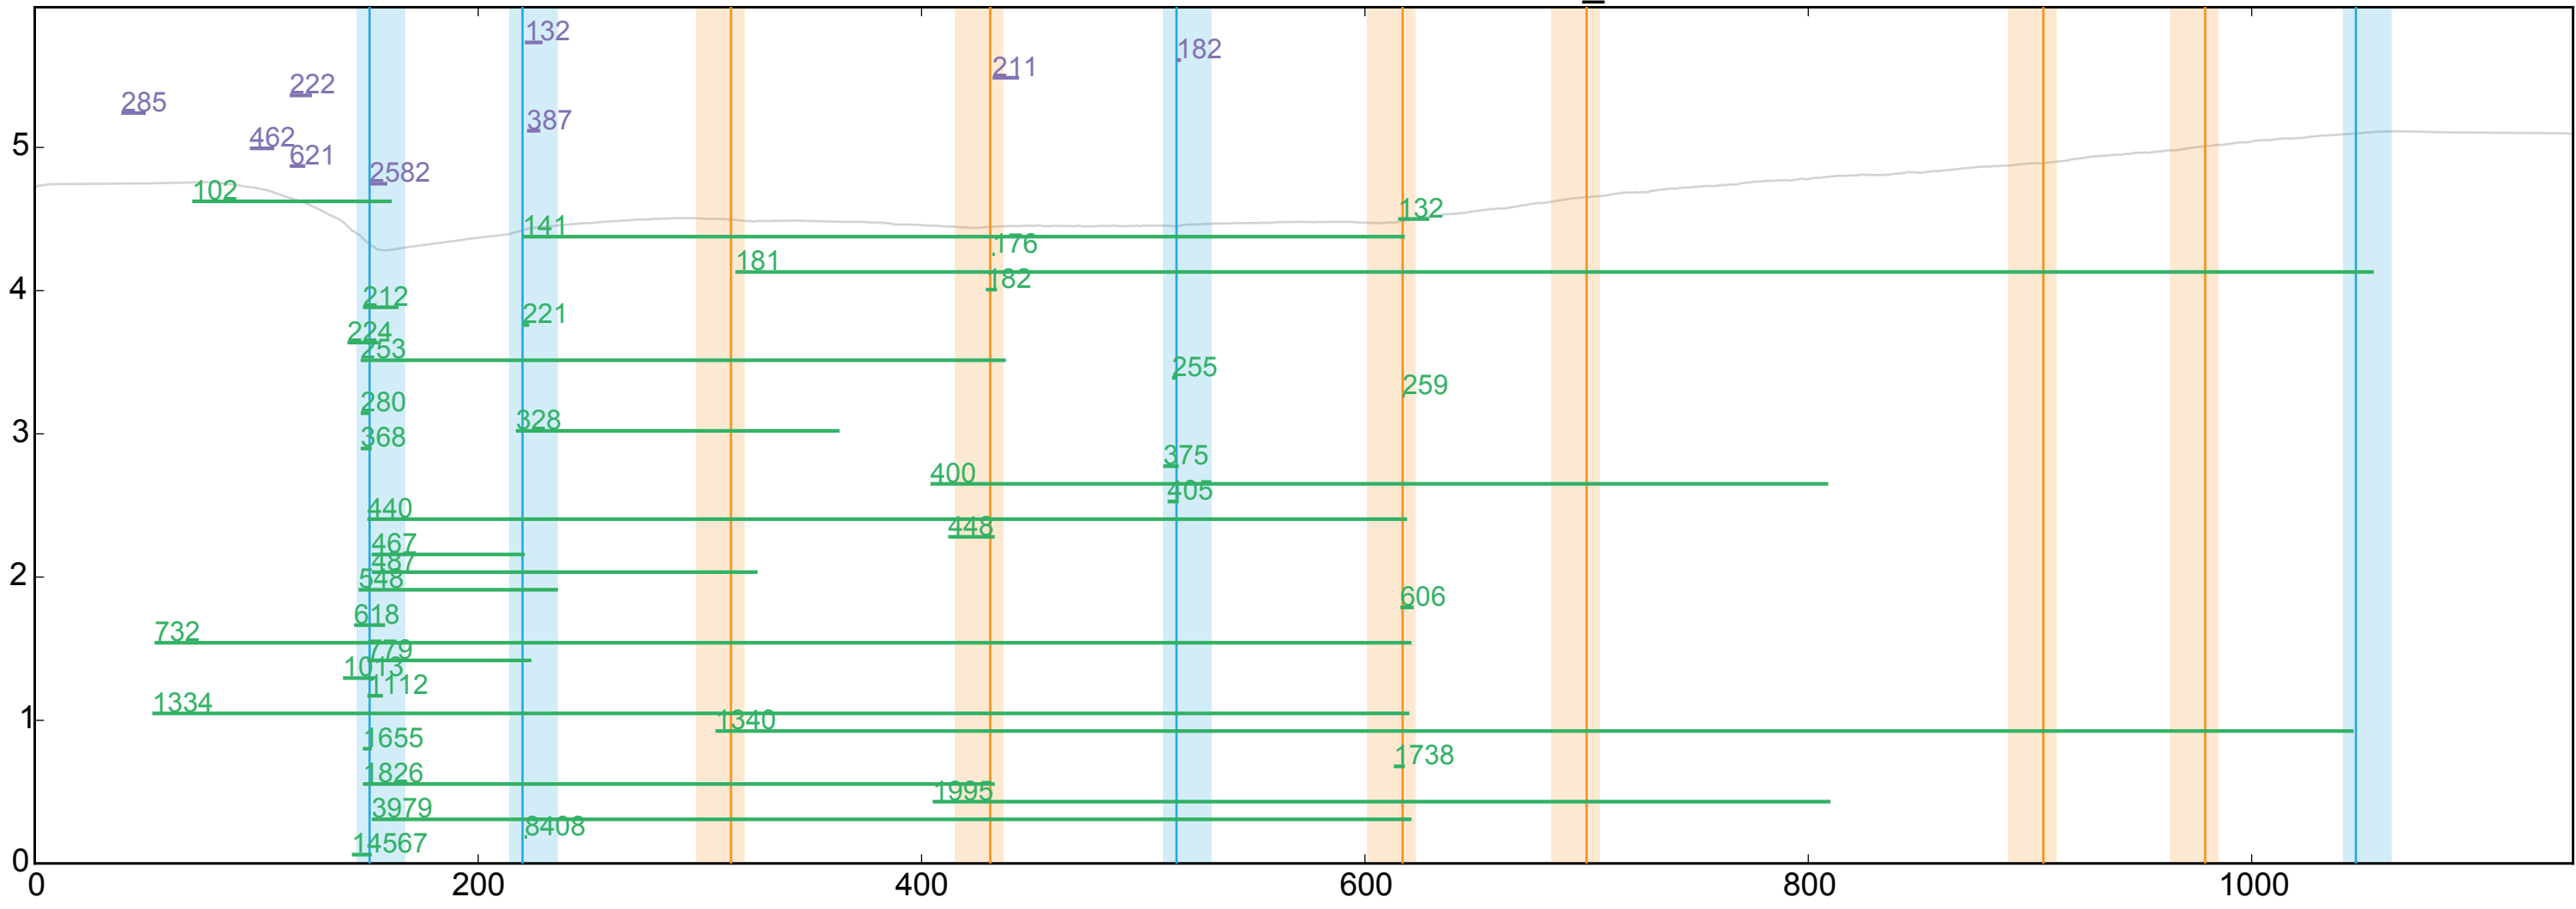

WT ENSDARG00000010770\_1

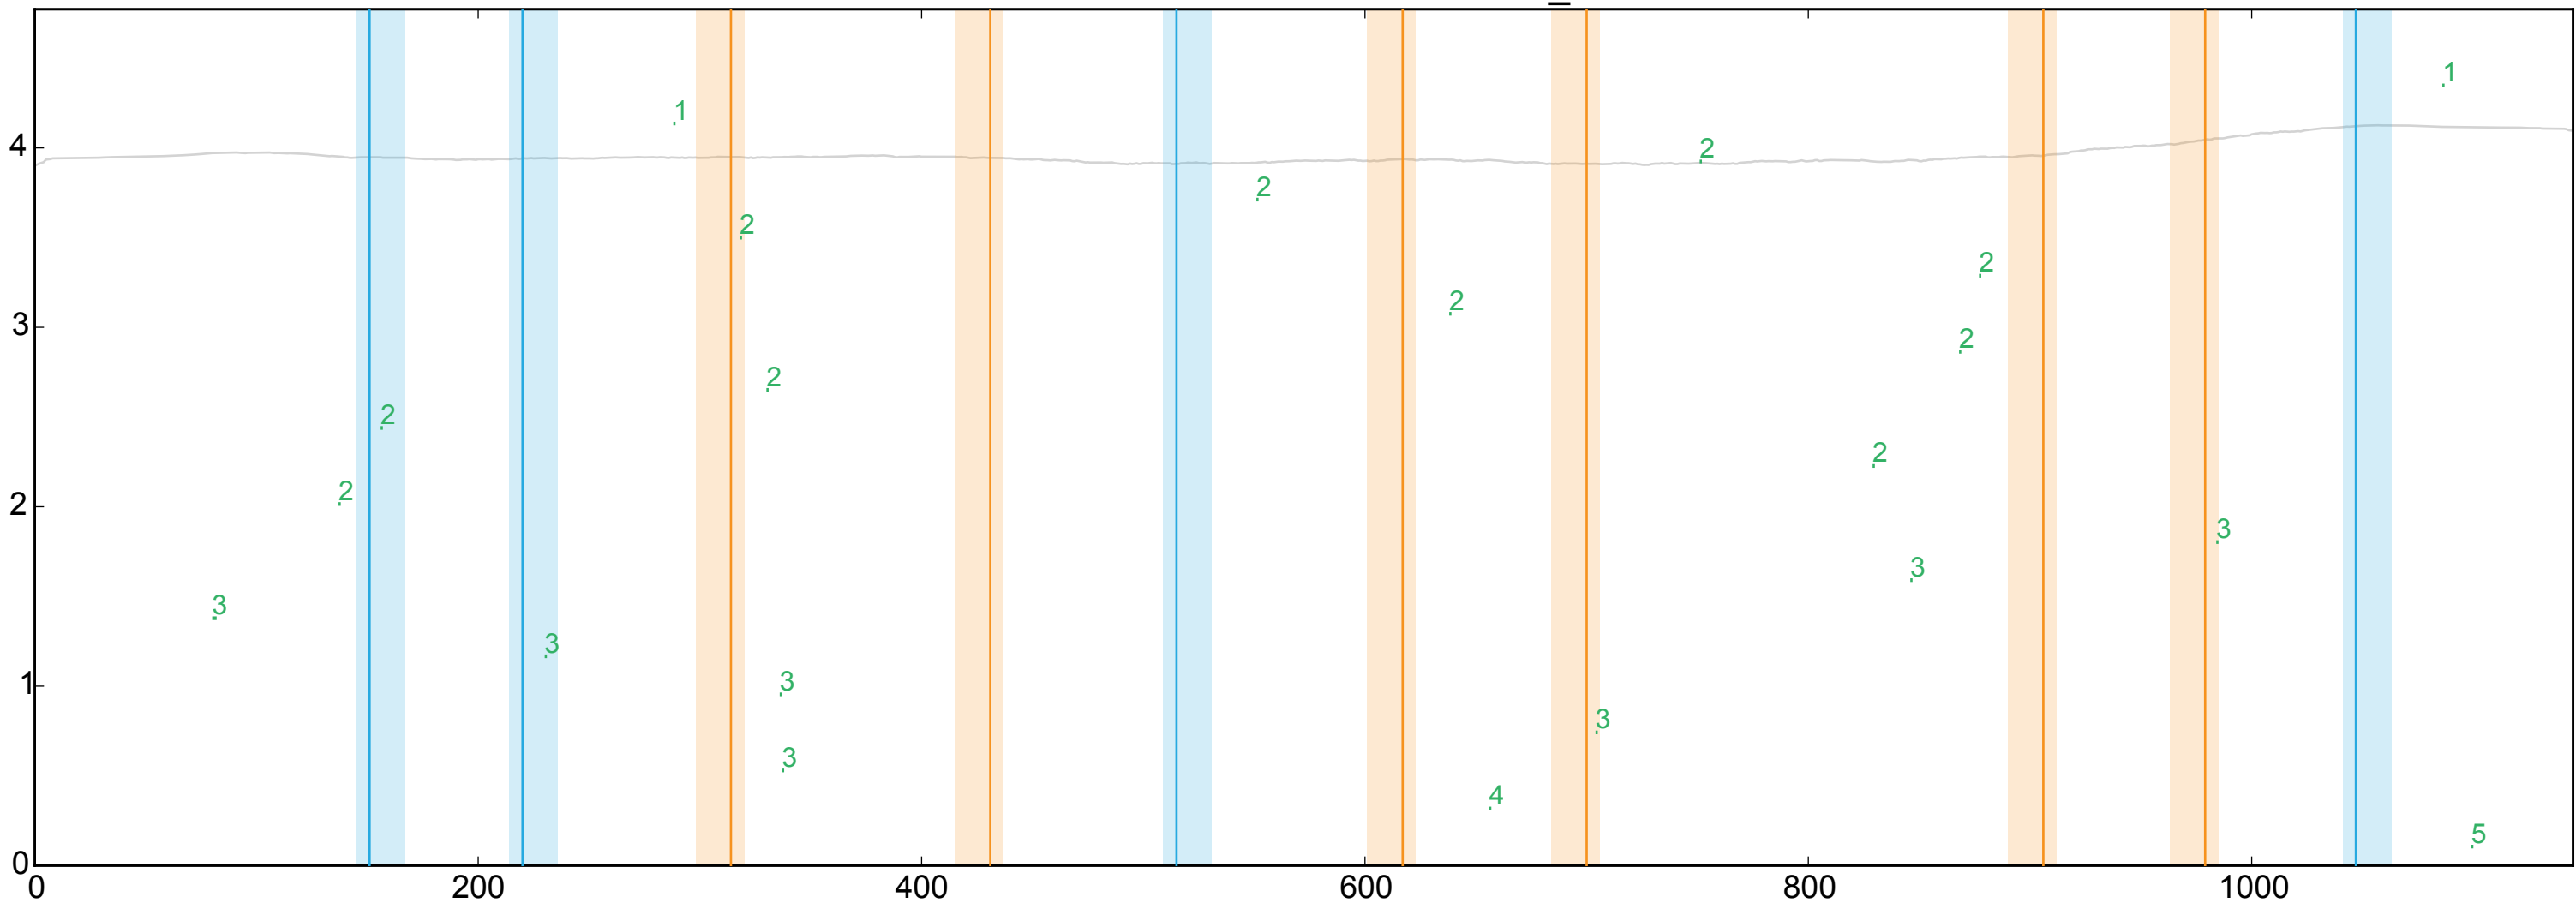

Mutant ENSDARG00000025108\_6

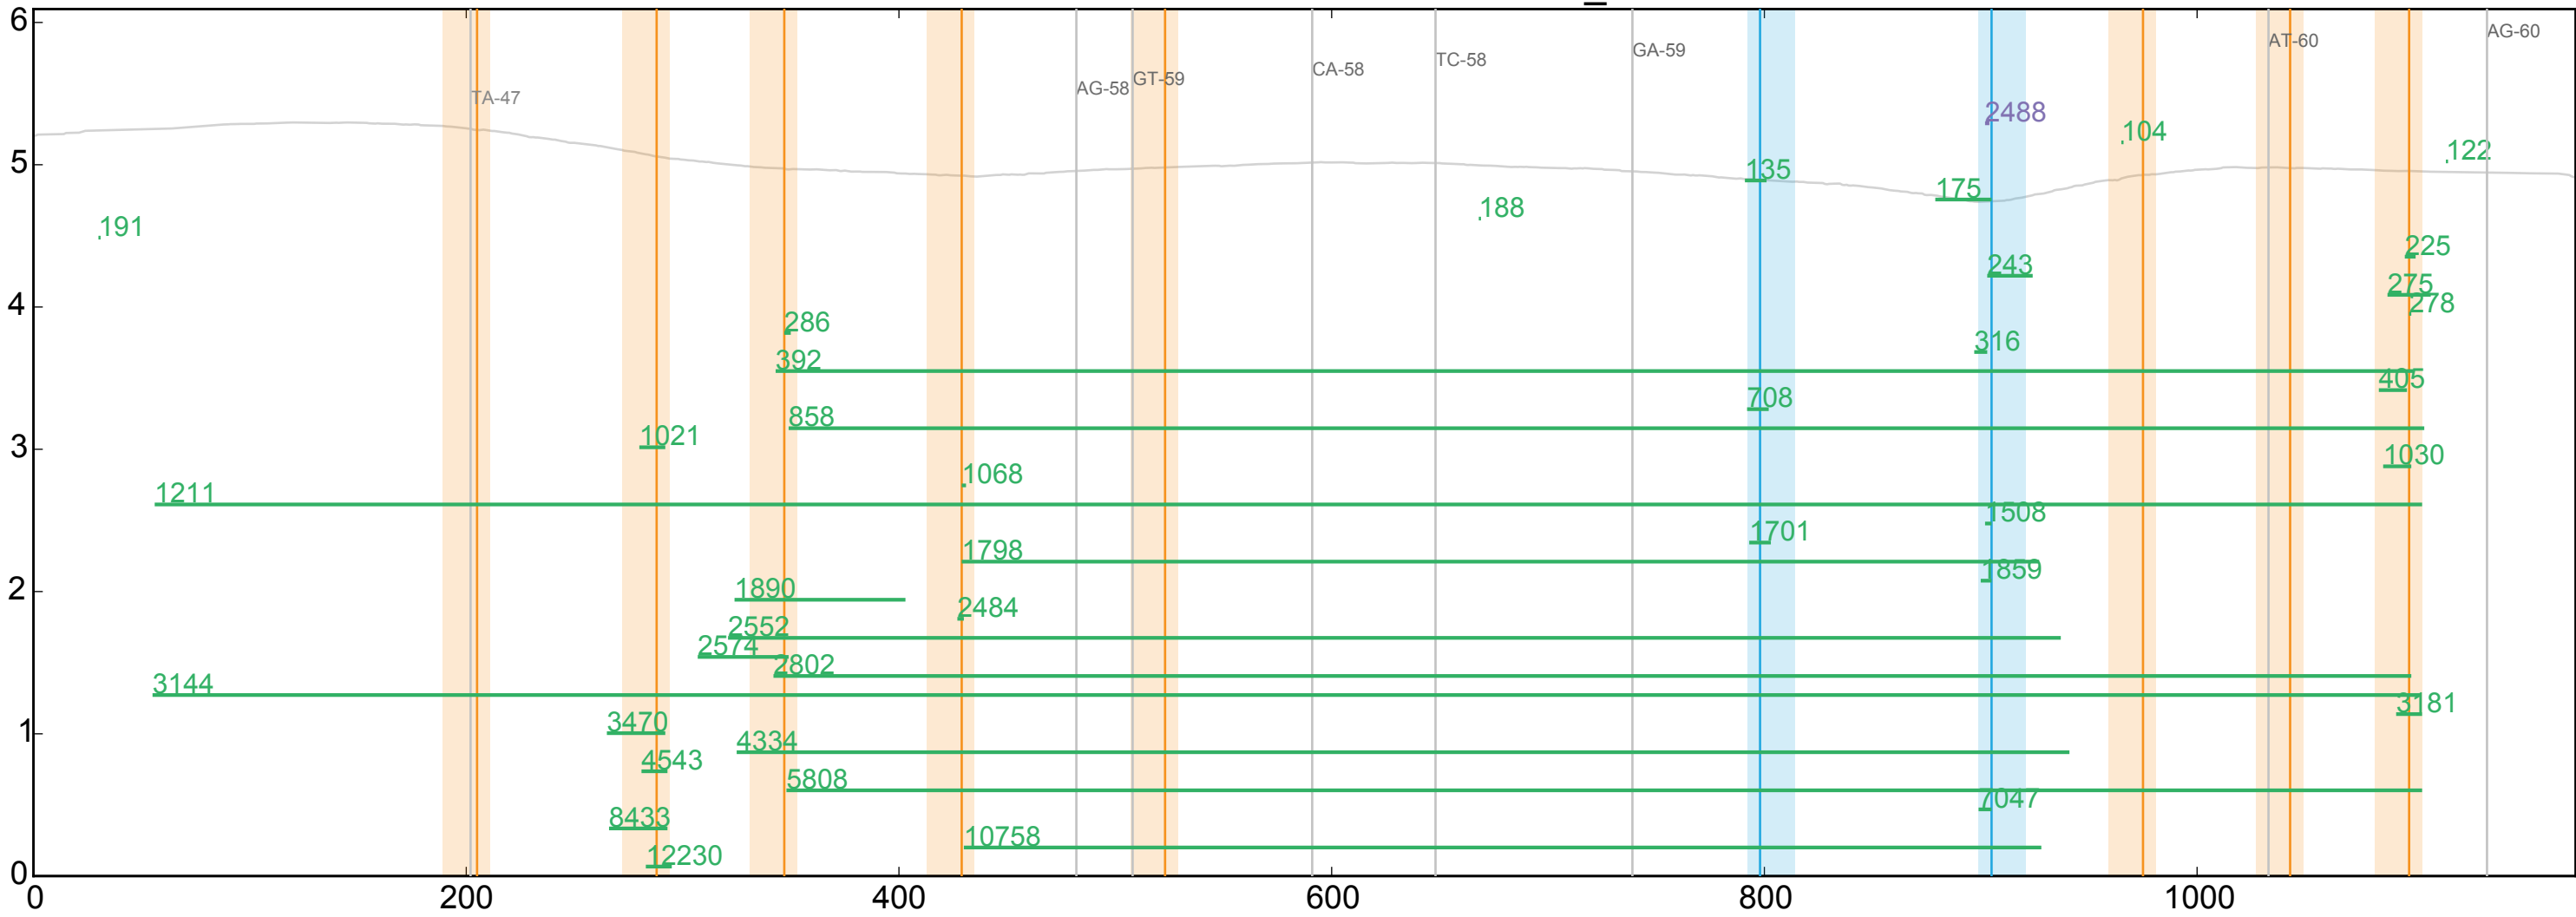

WT ENSDARG00000025108\_6

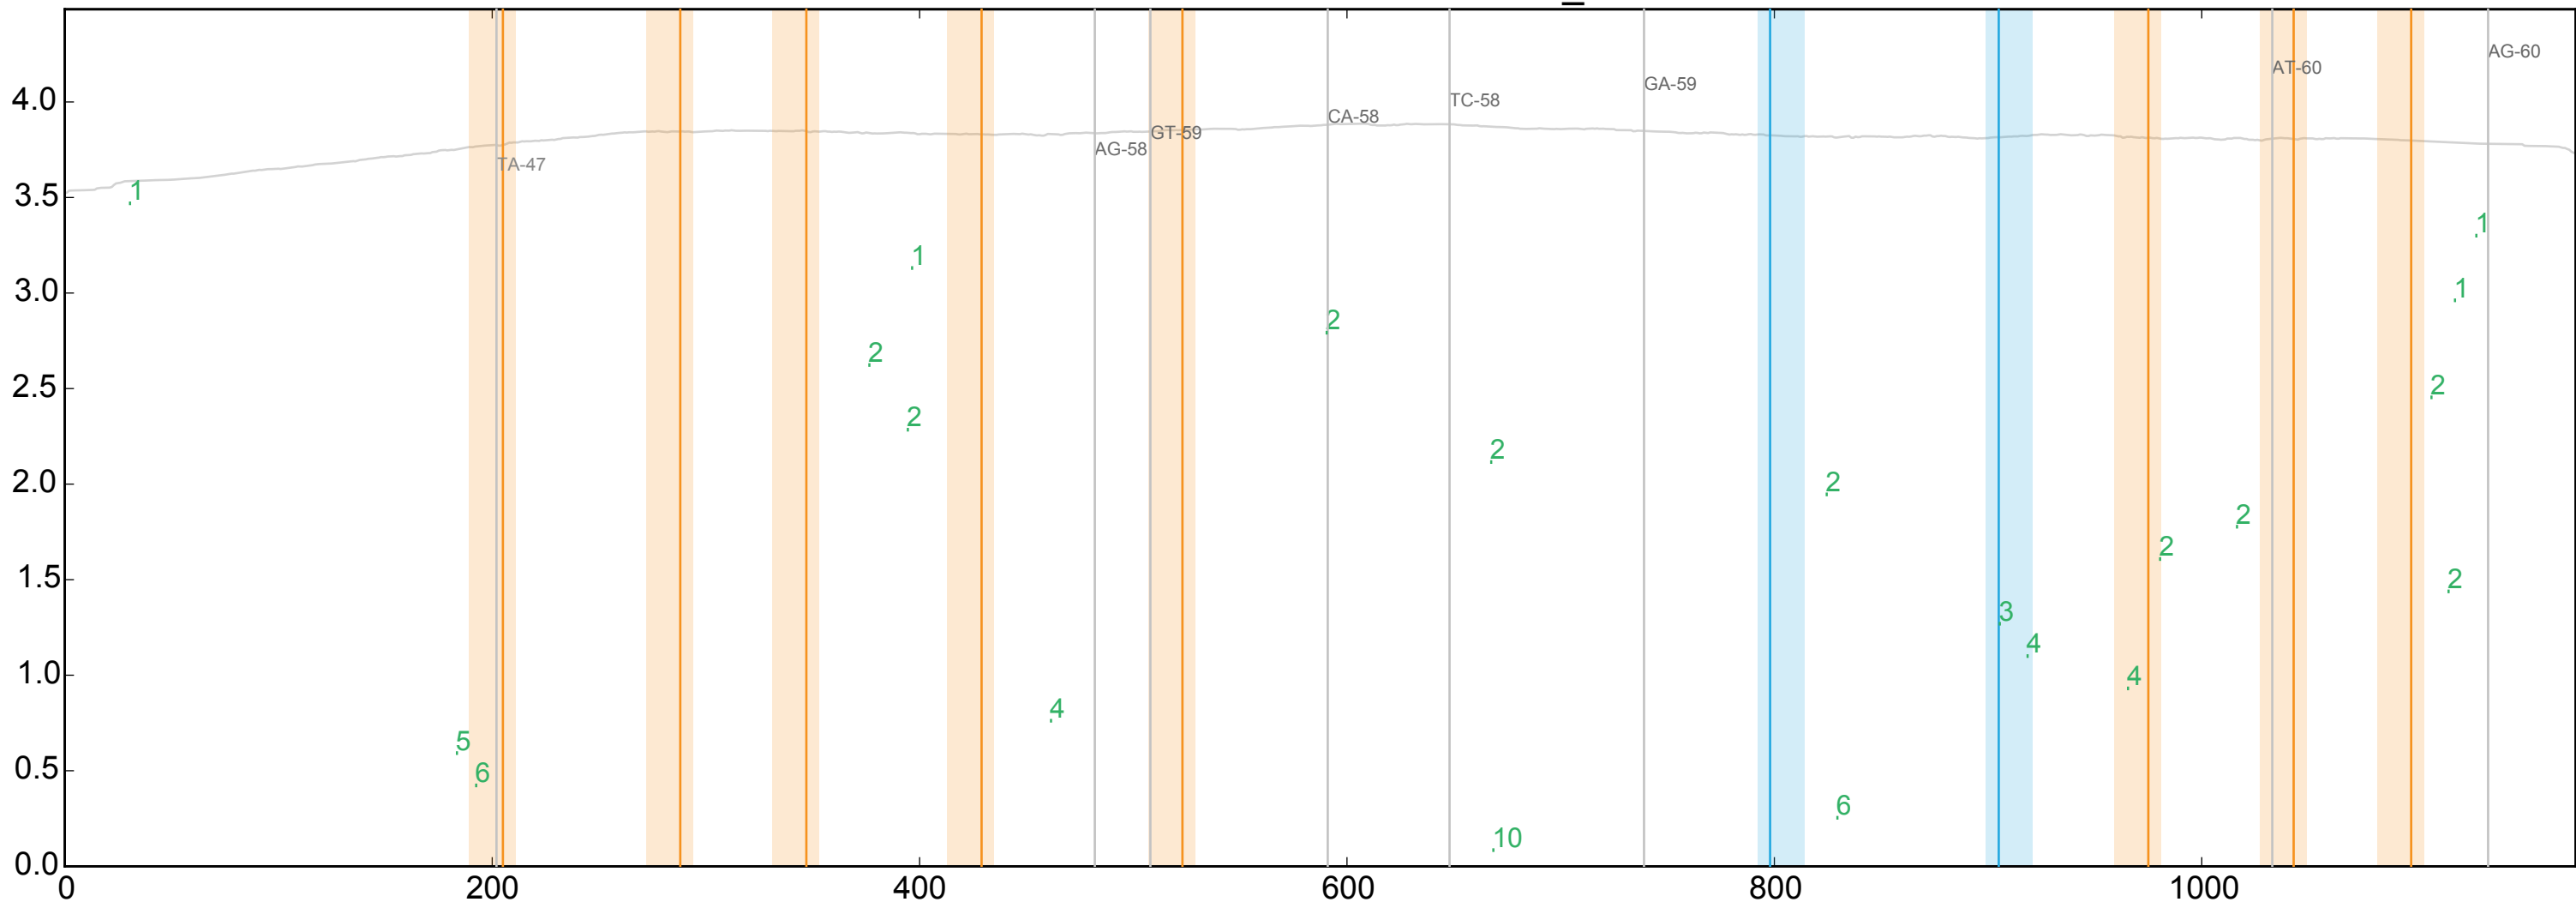

Mutant ENSDARG00000015222\_0

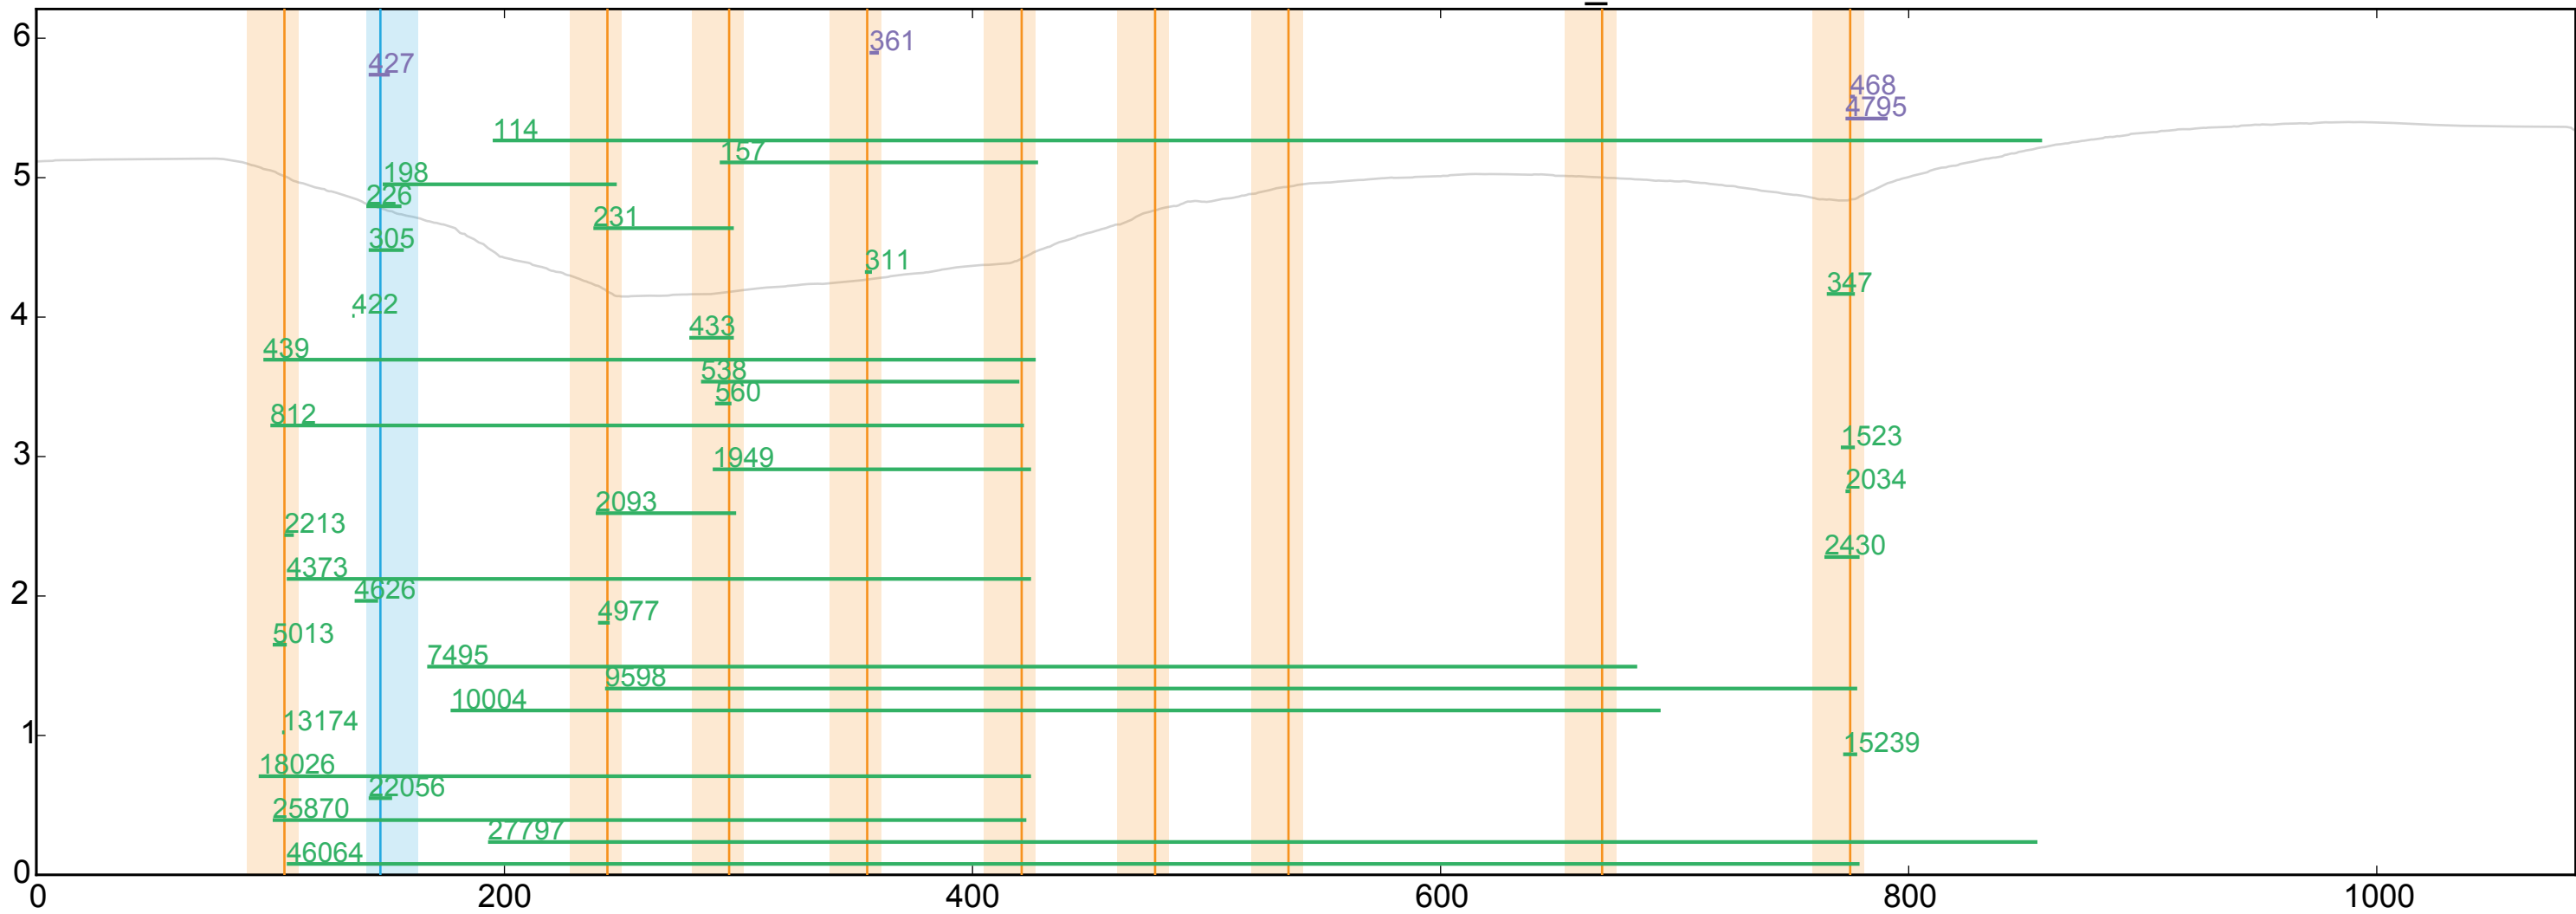

WT ENSDARG00000015222\_0

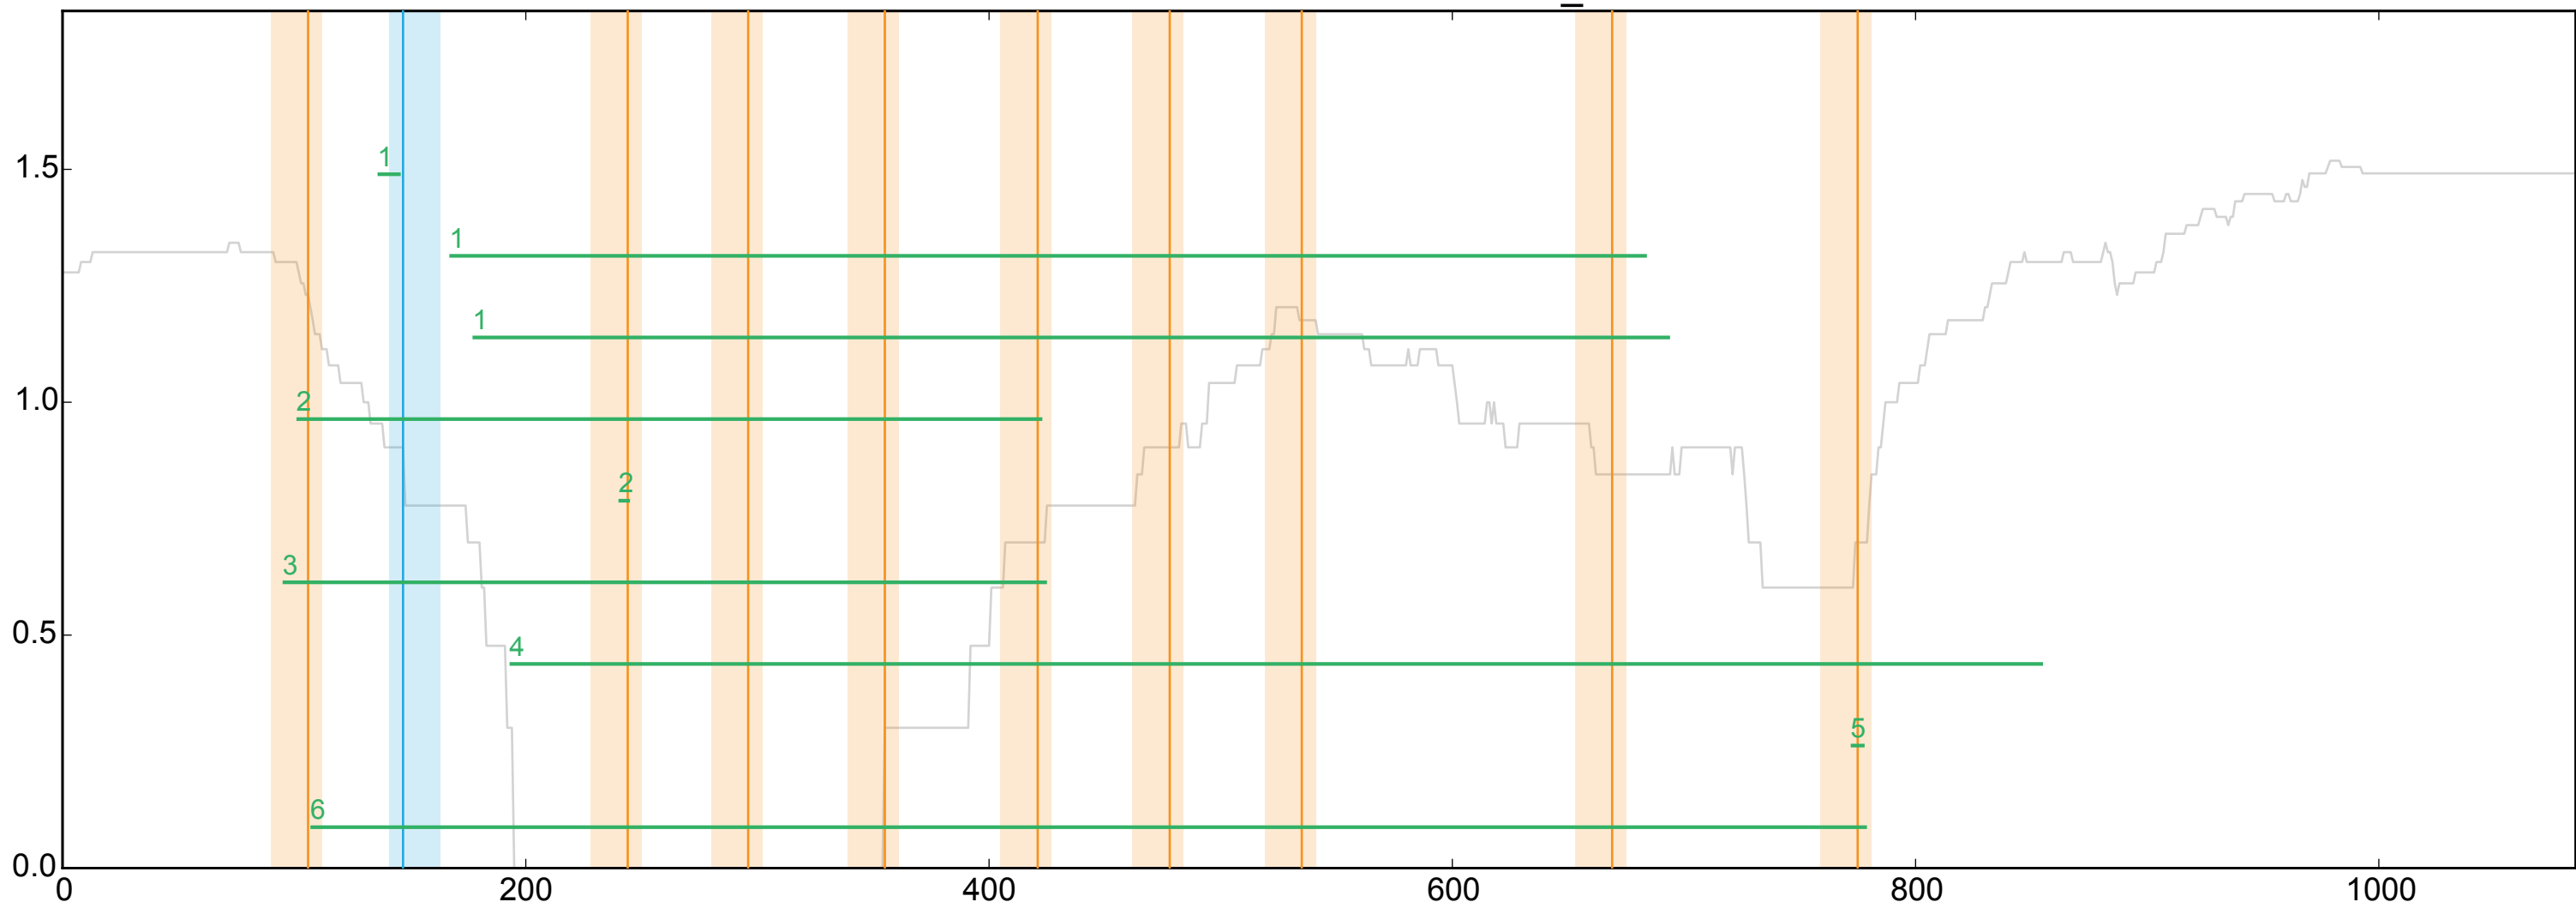

Mutant ENSDARG00000074184\_0

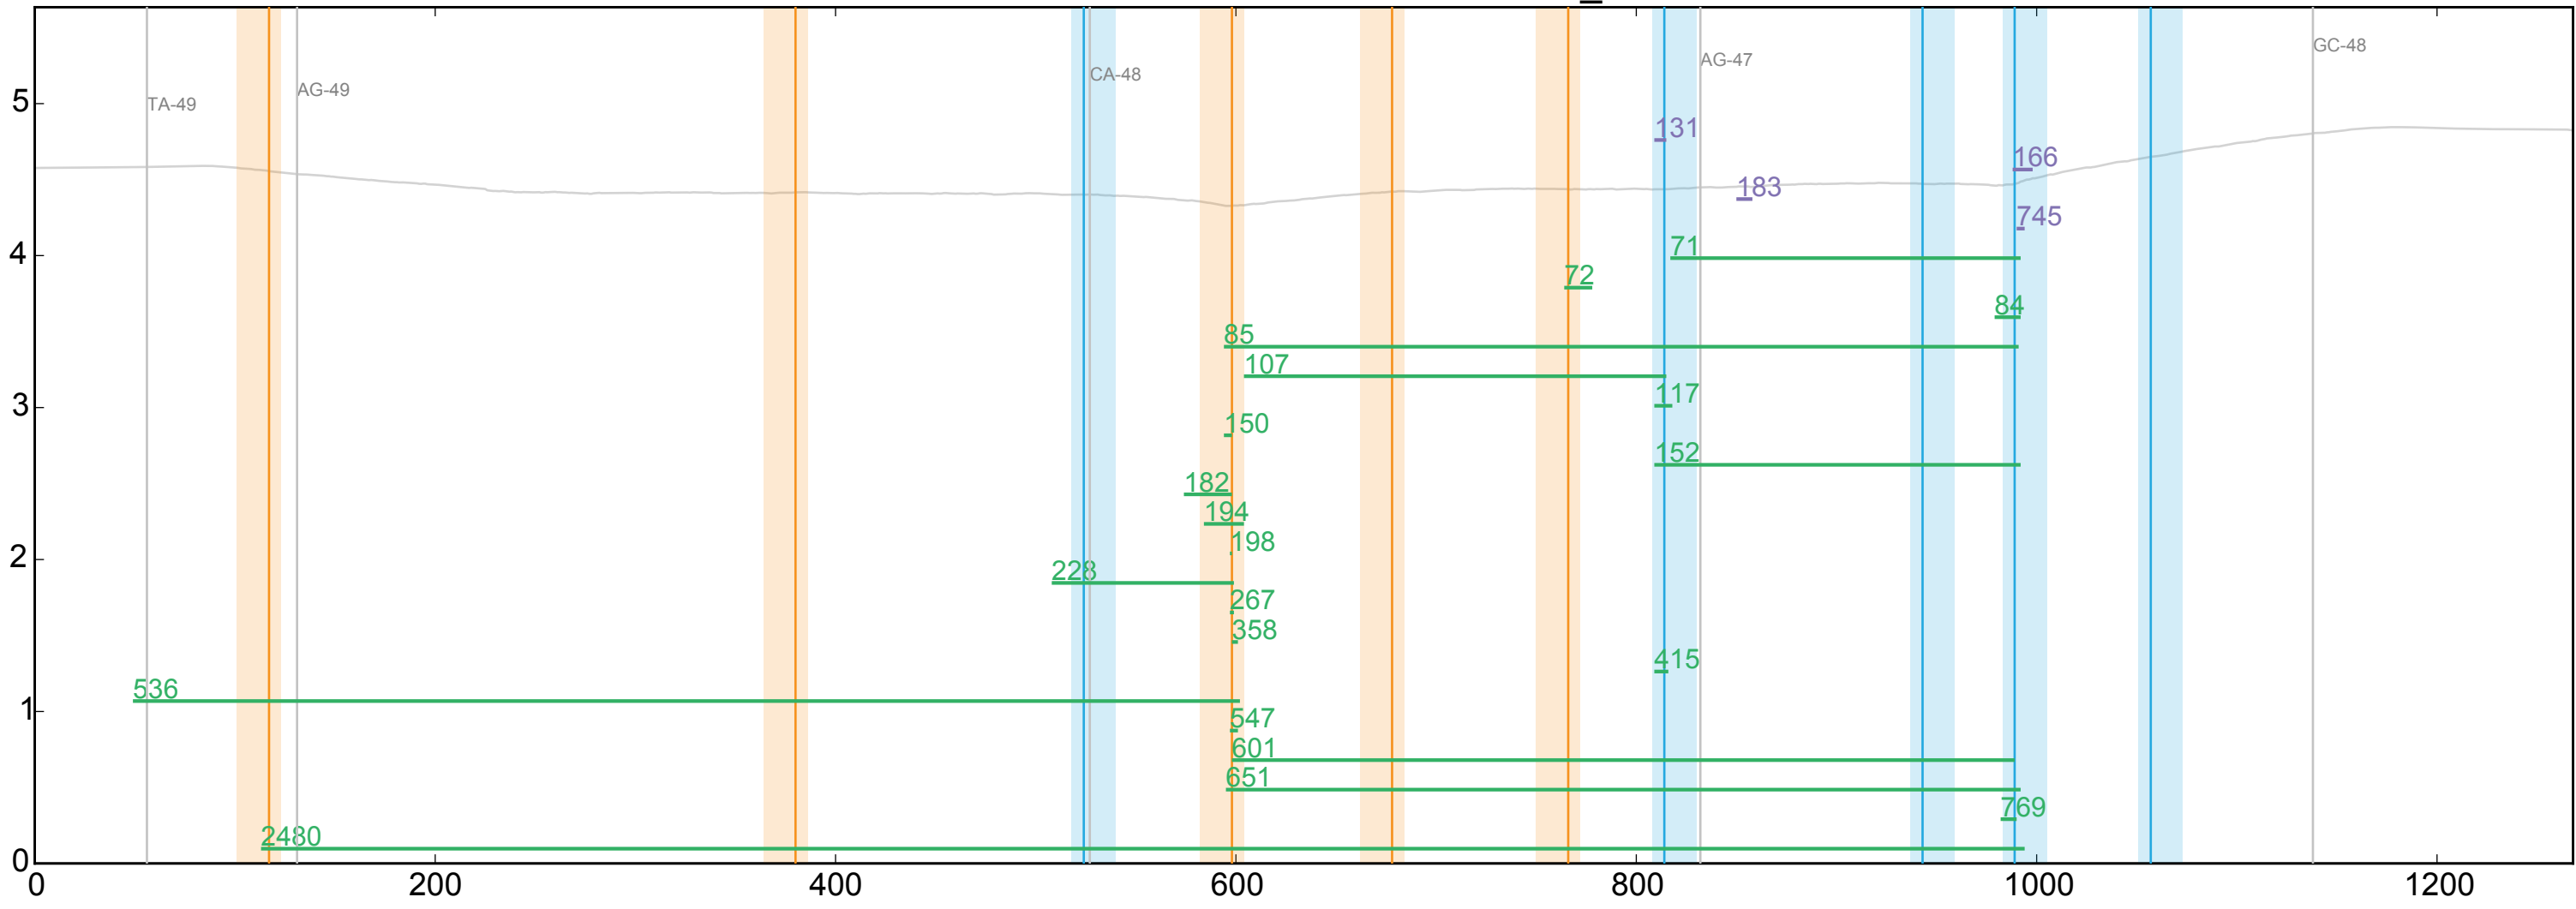

WT ENSDARG00000074184\_0

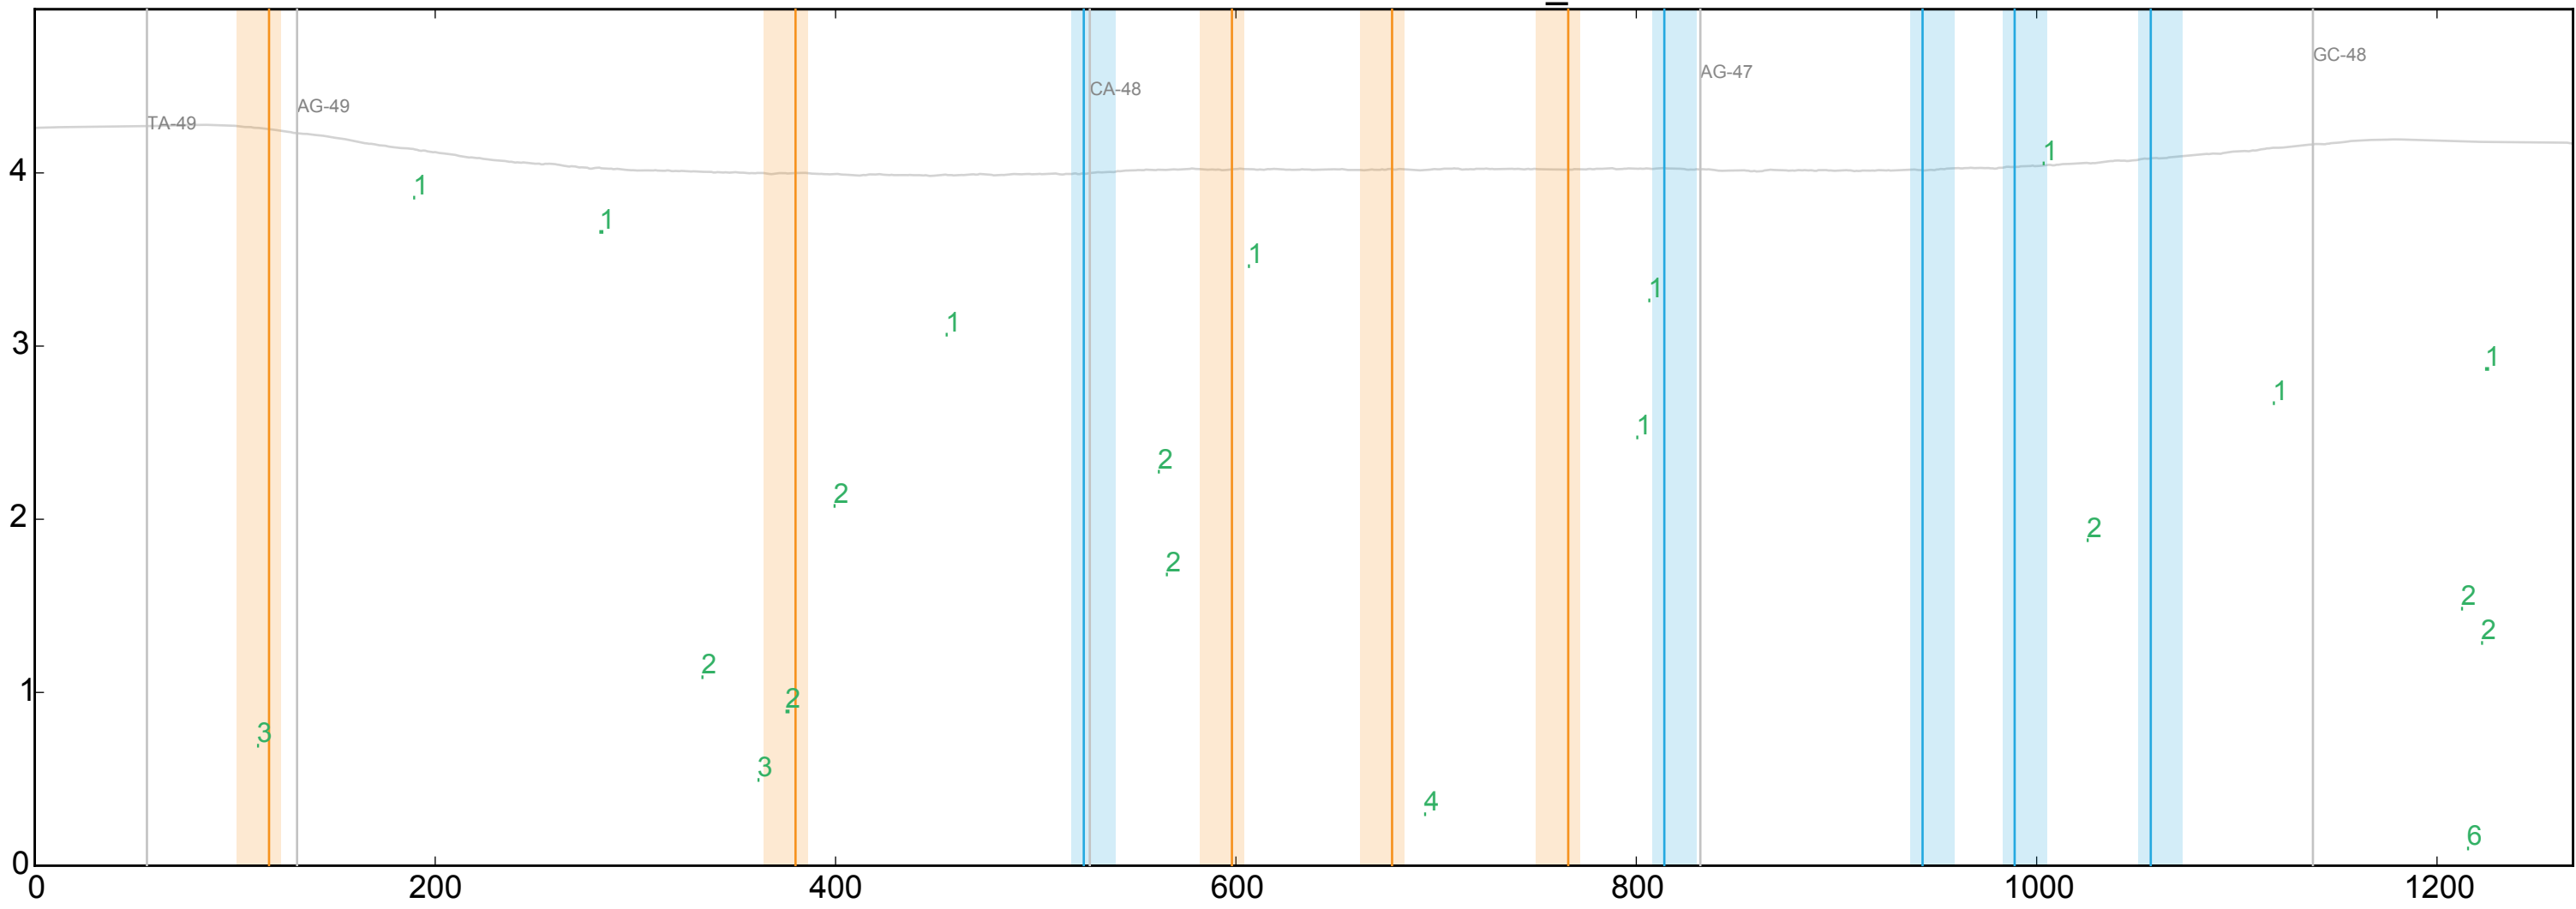

Mutant ENSDARG0000071150\_18

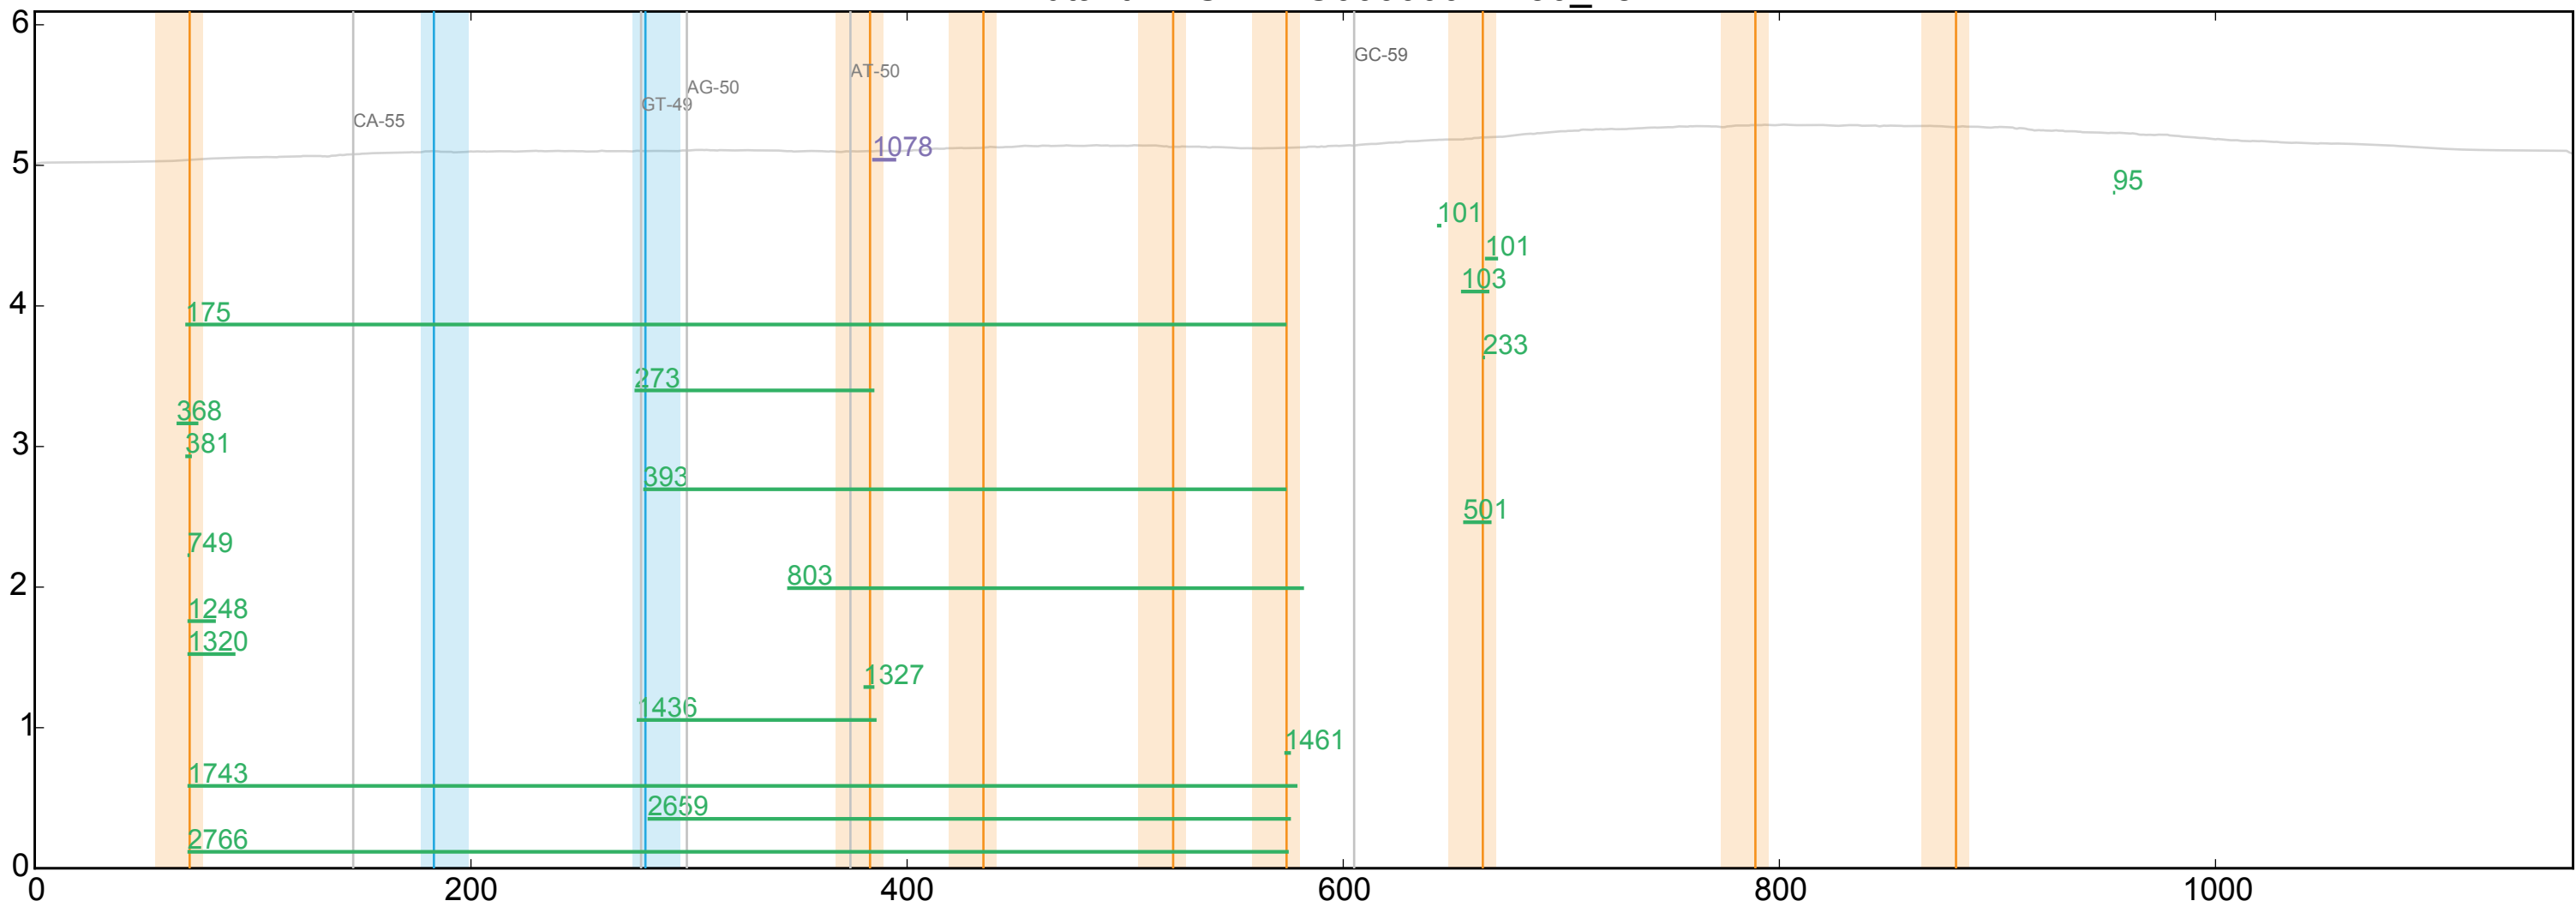

WT ENSDARG0000071150\_18

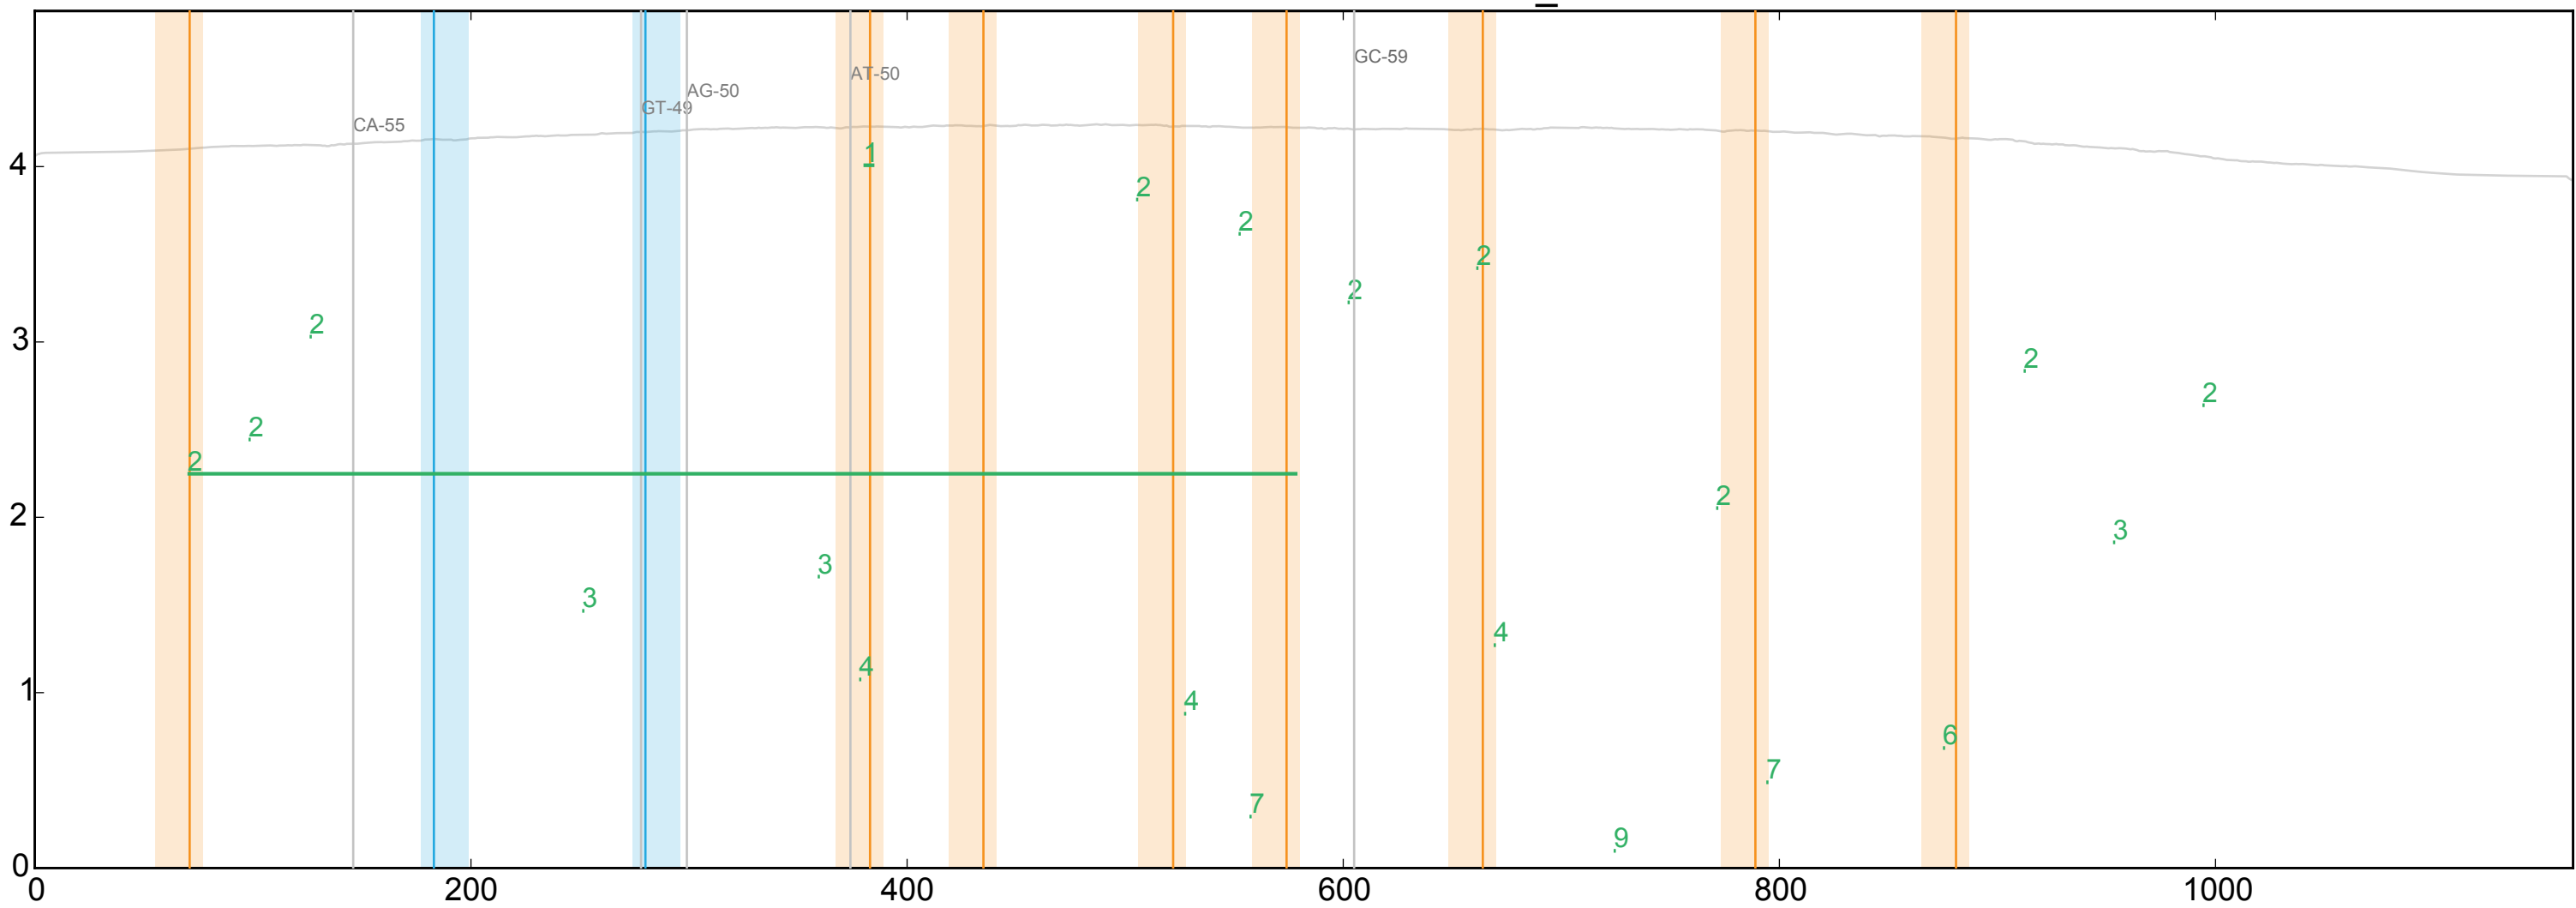

Mutant ENSDARG00000078199\_0

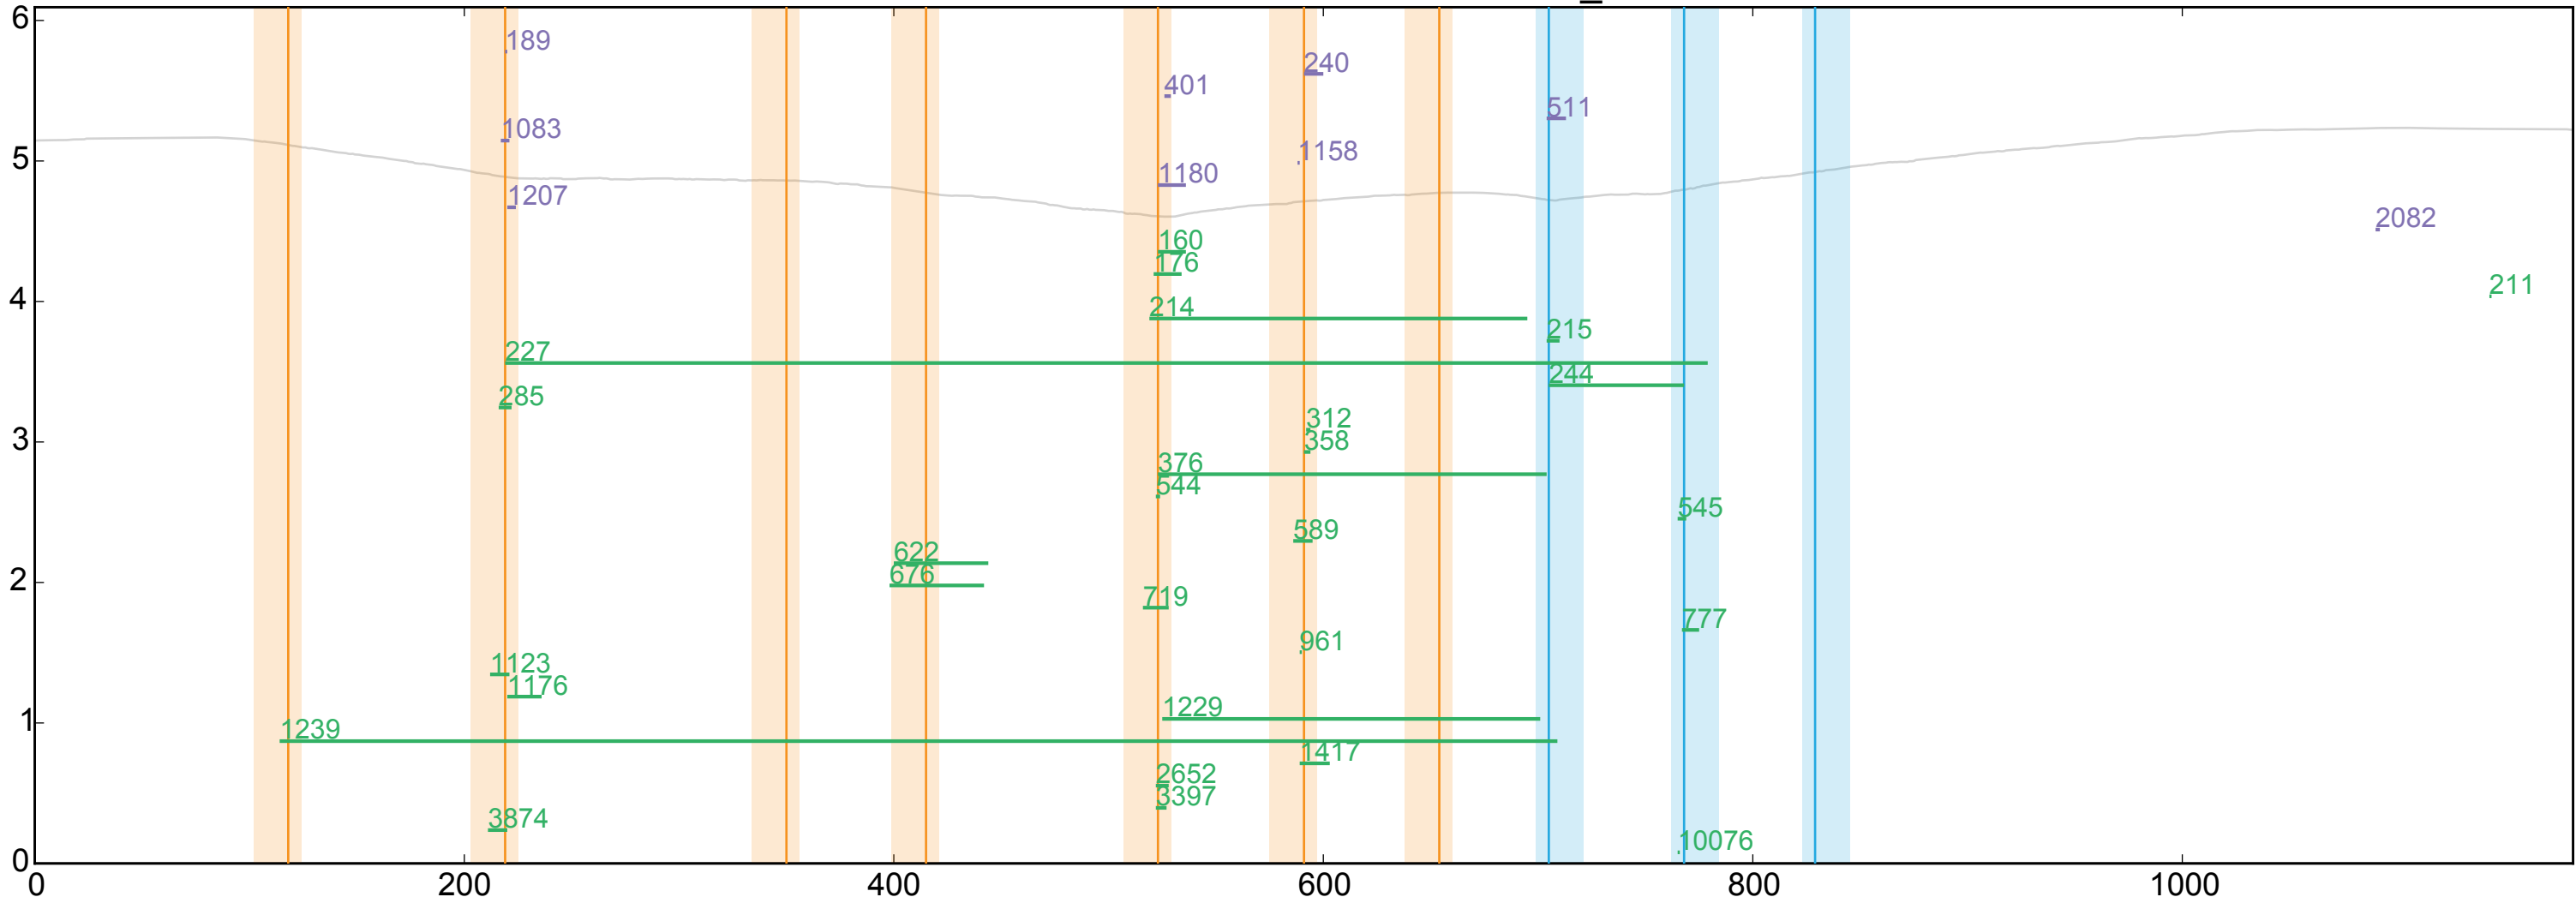

WT ENSDARG00000078199\_0

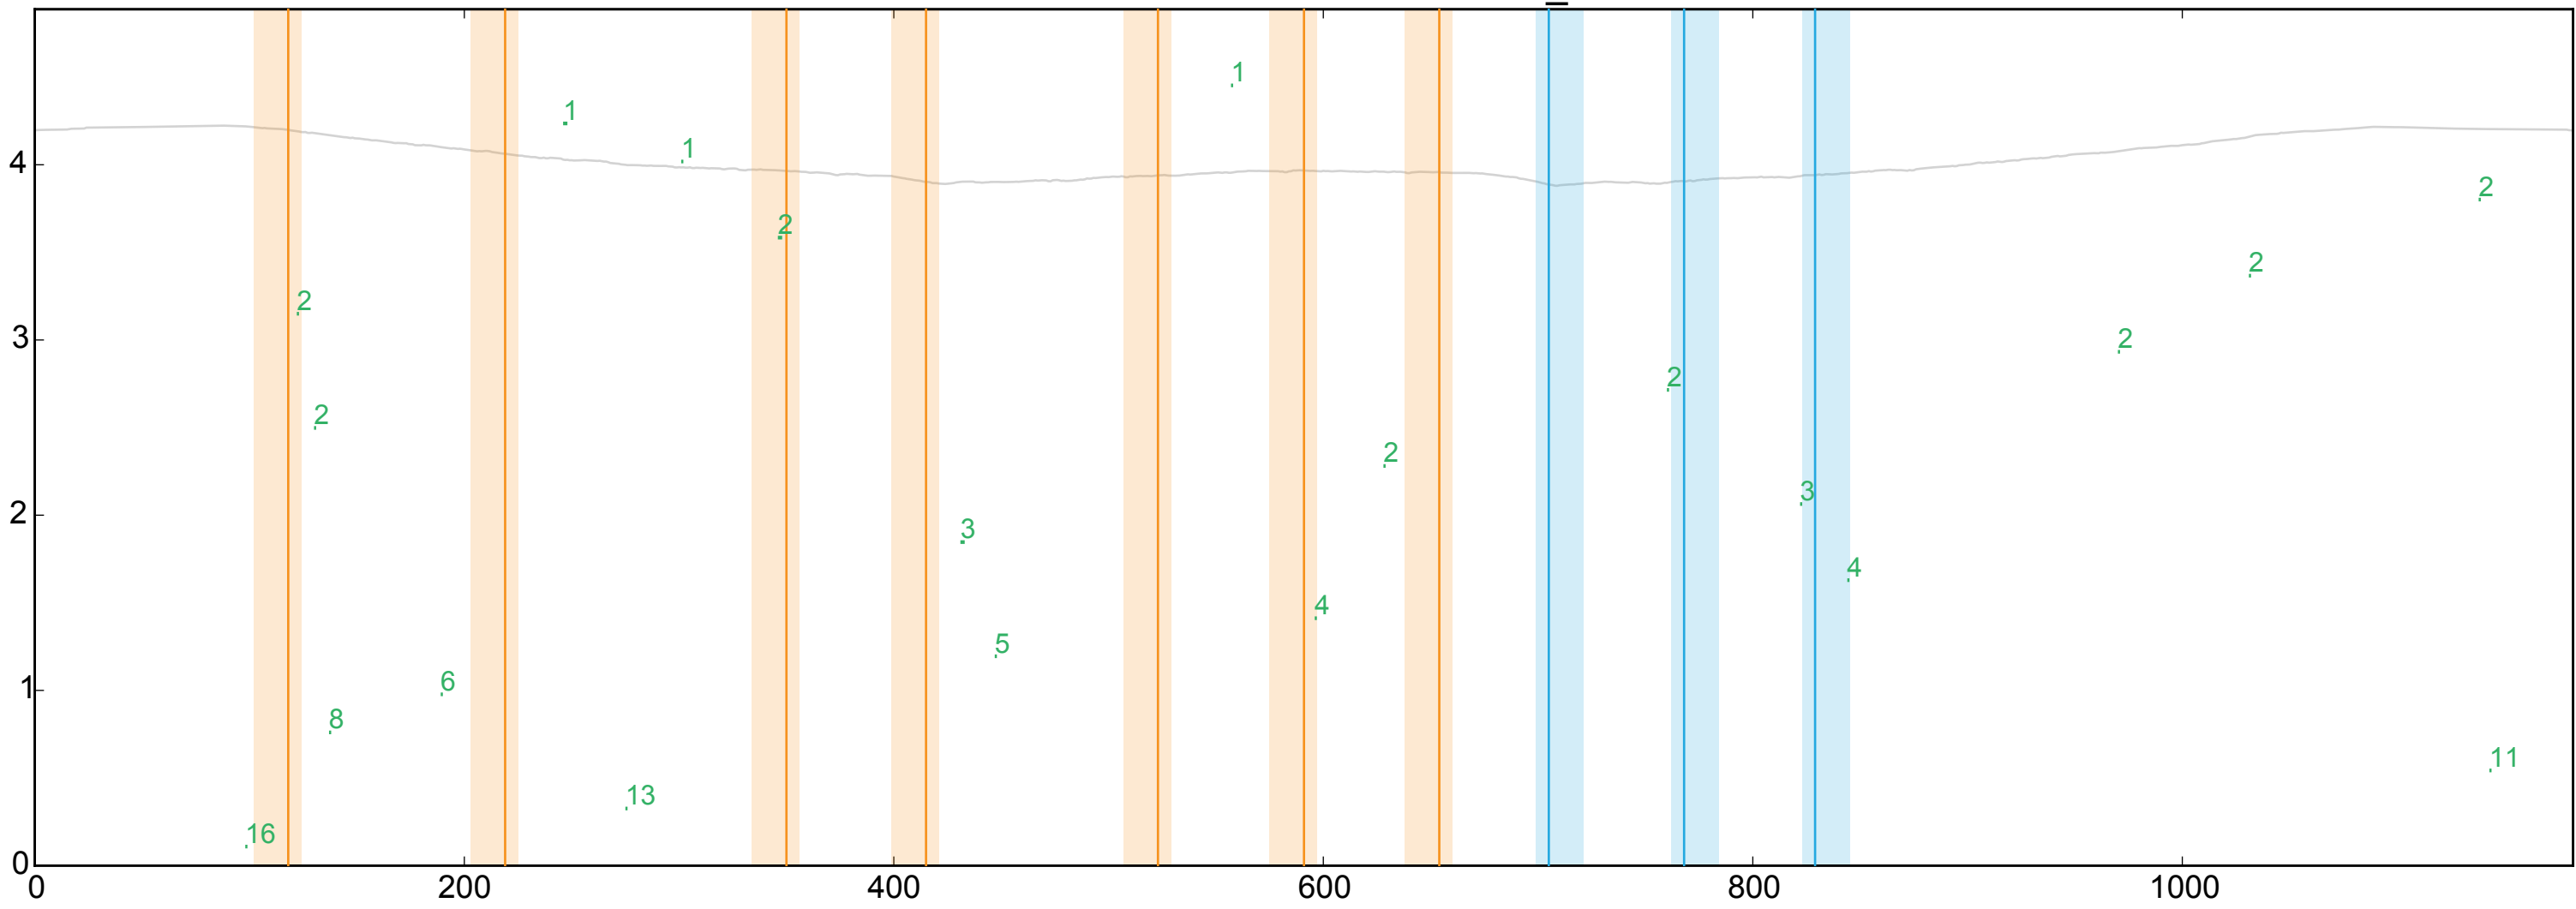



Mutant ENSDARG00000068650\_6

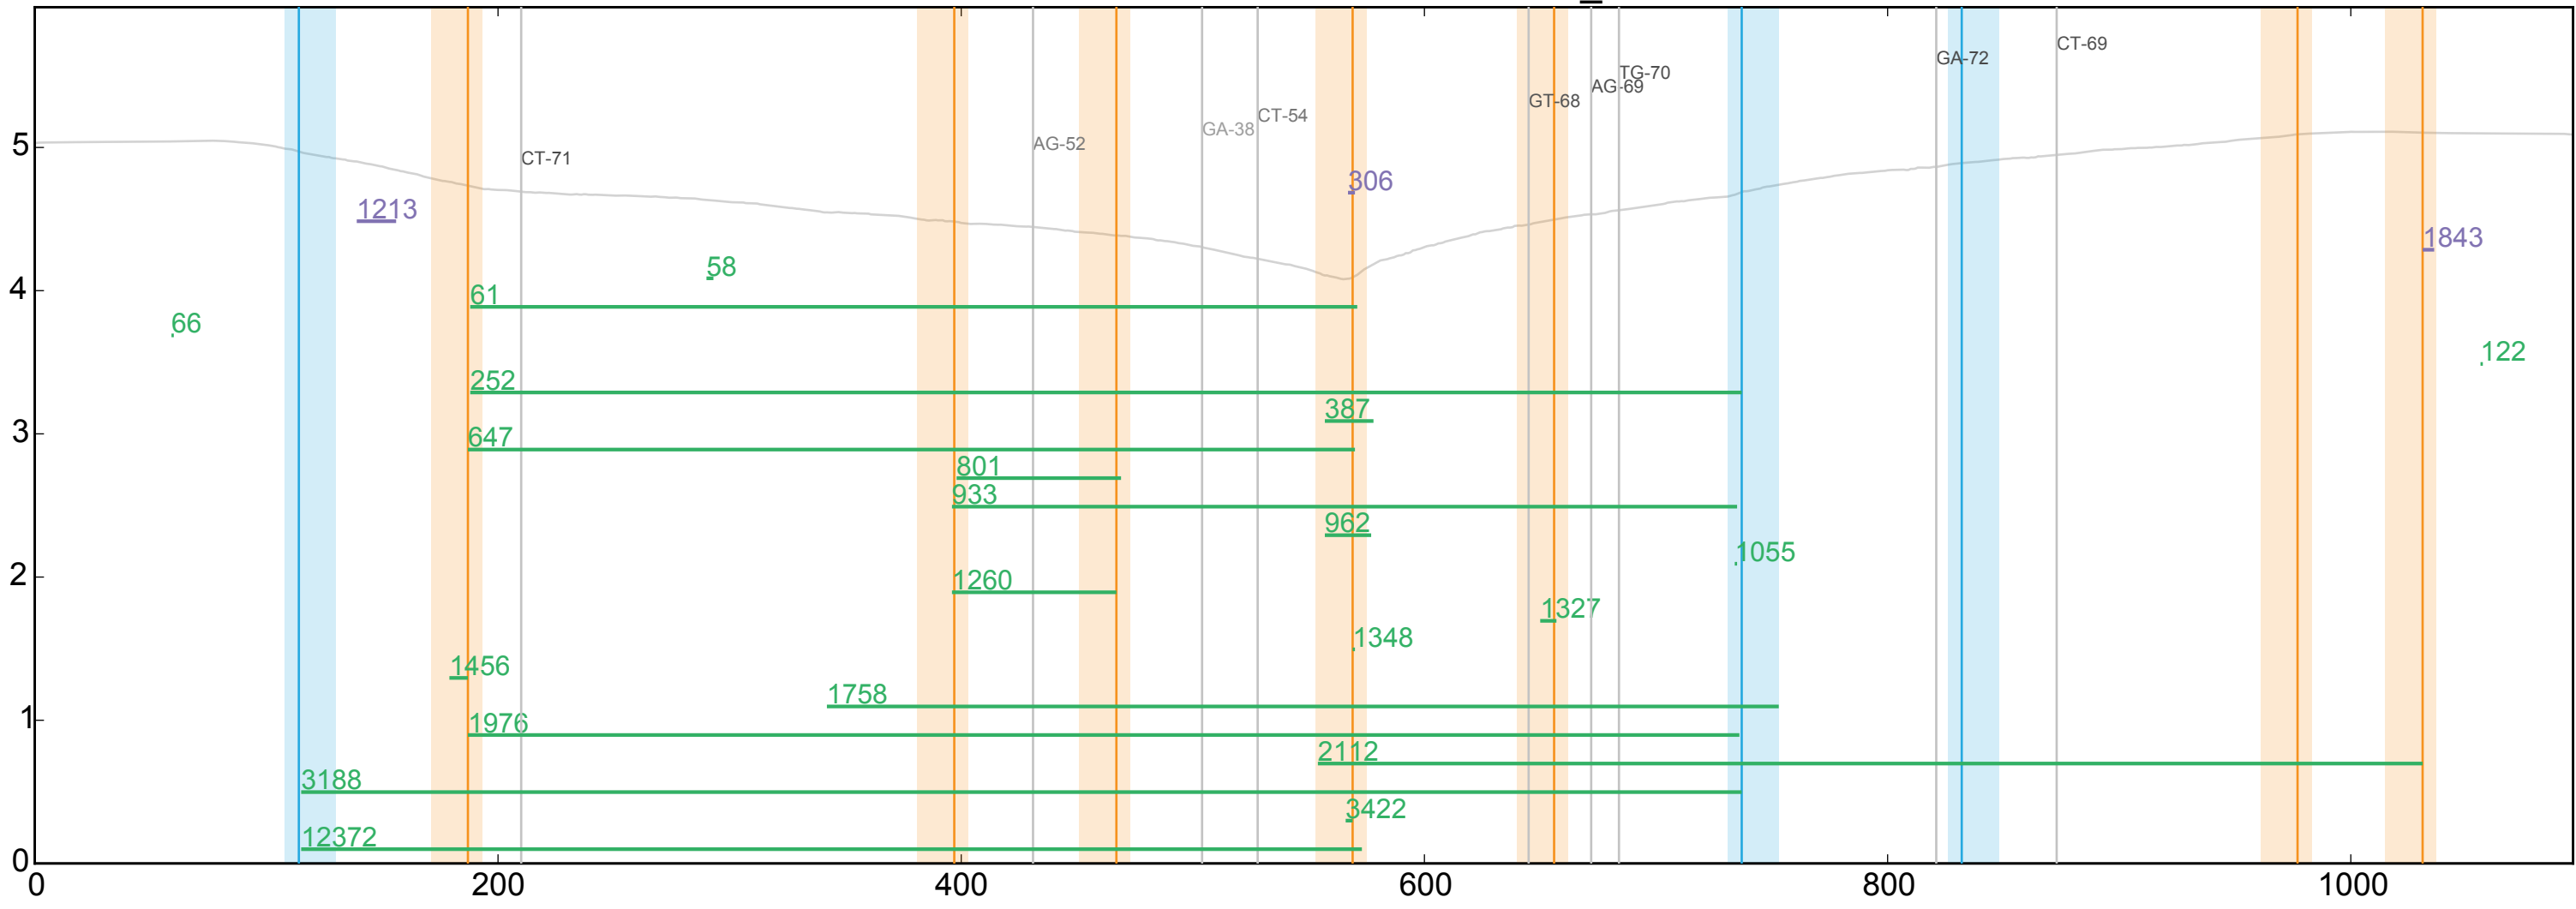

WT ENSDARG00000068650\_6

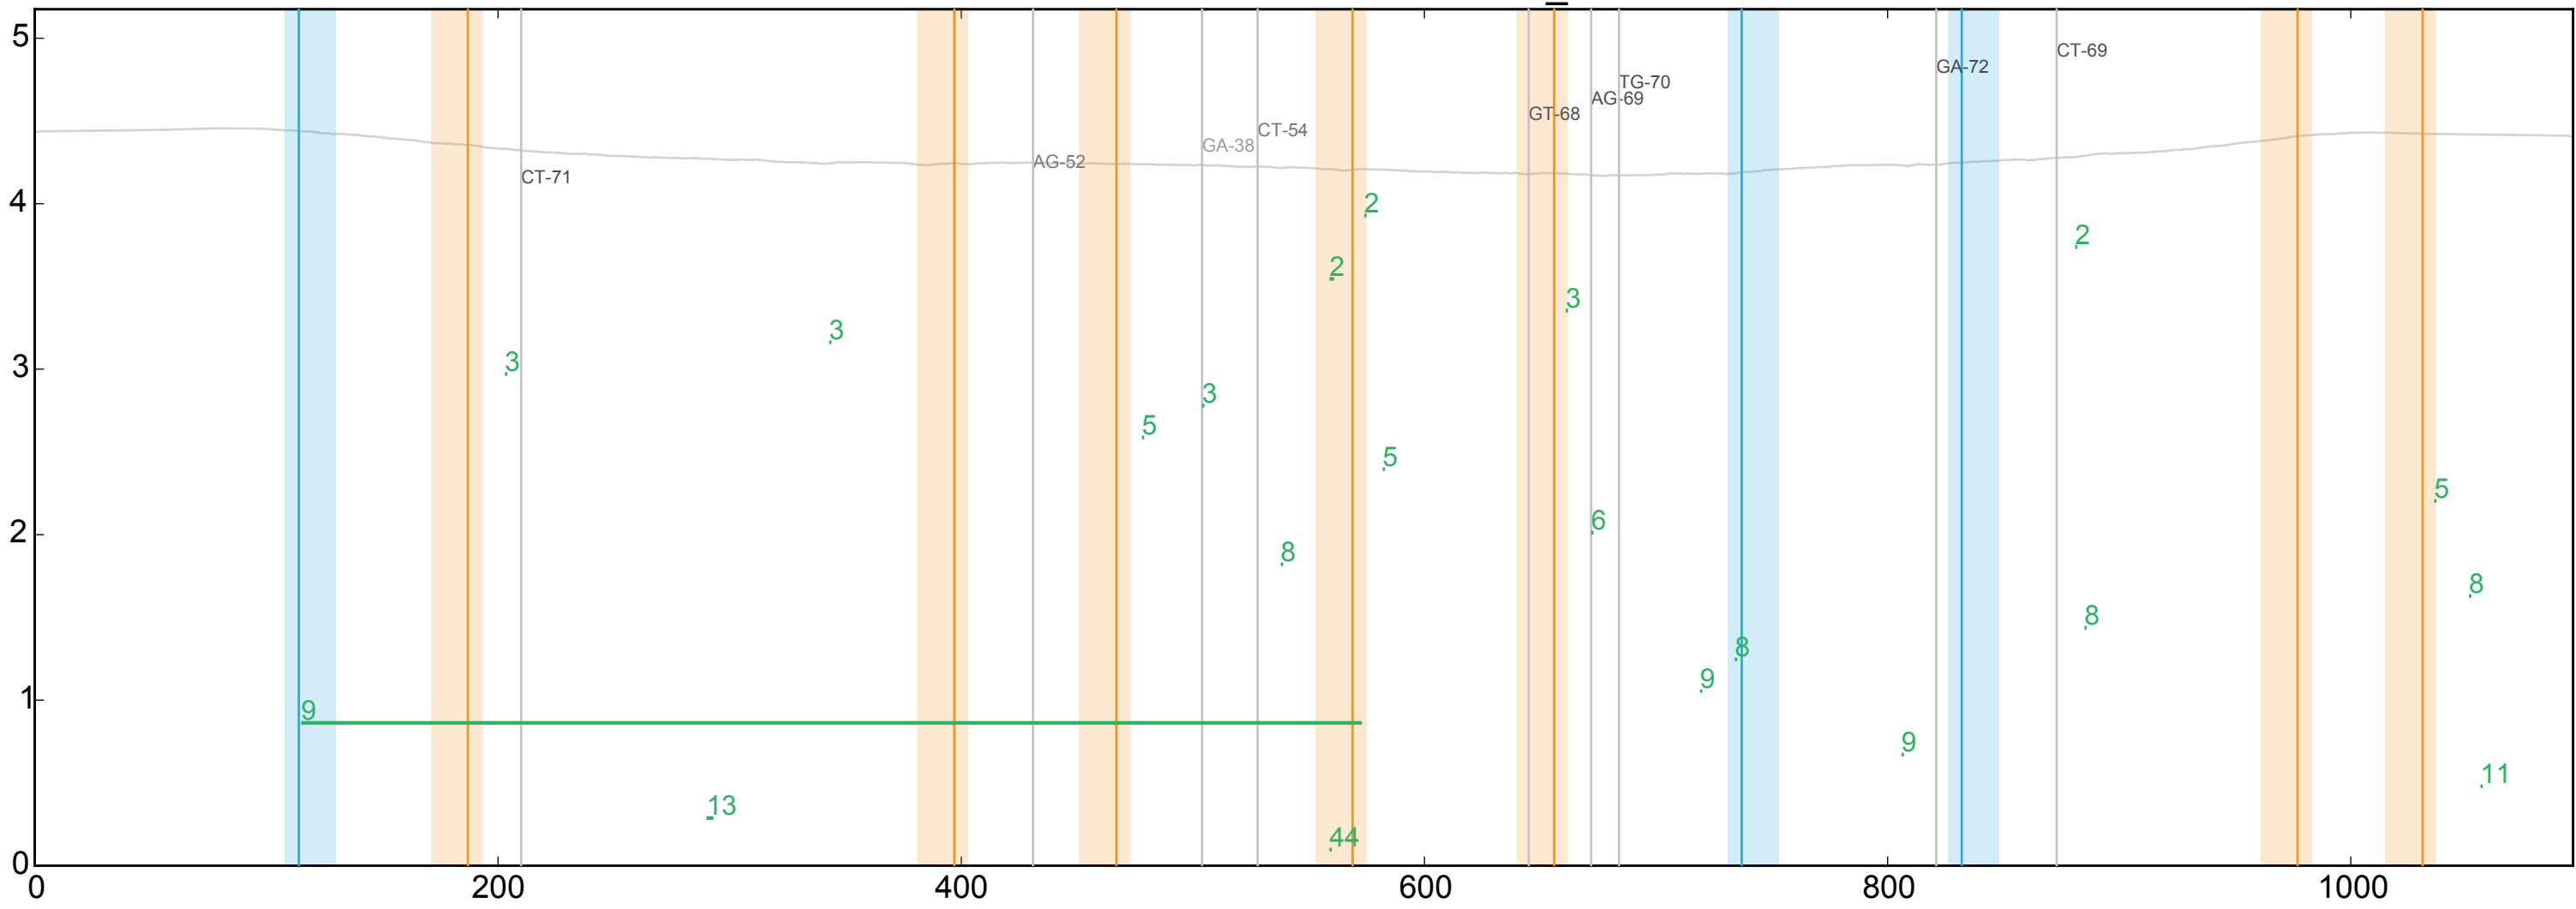



Mutant ENSDARG00000038458\_3

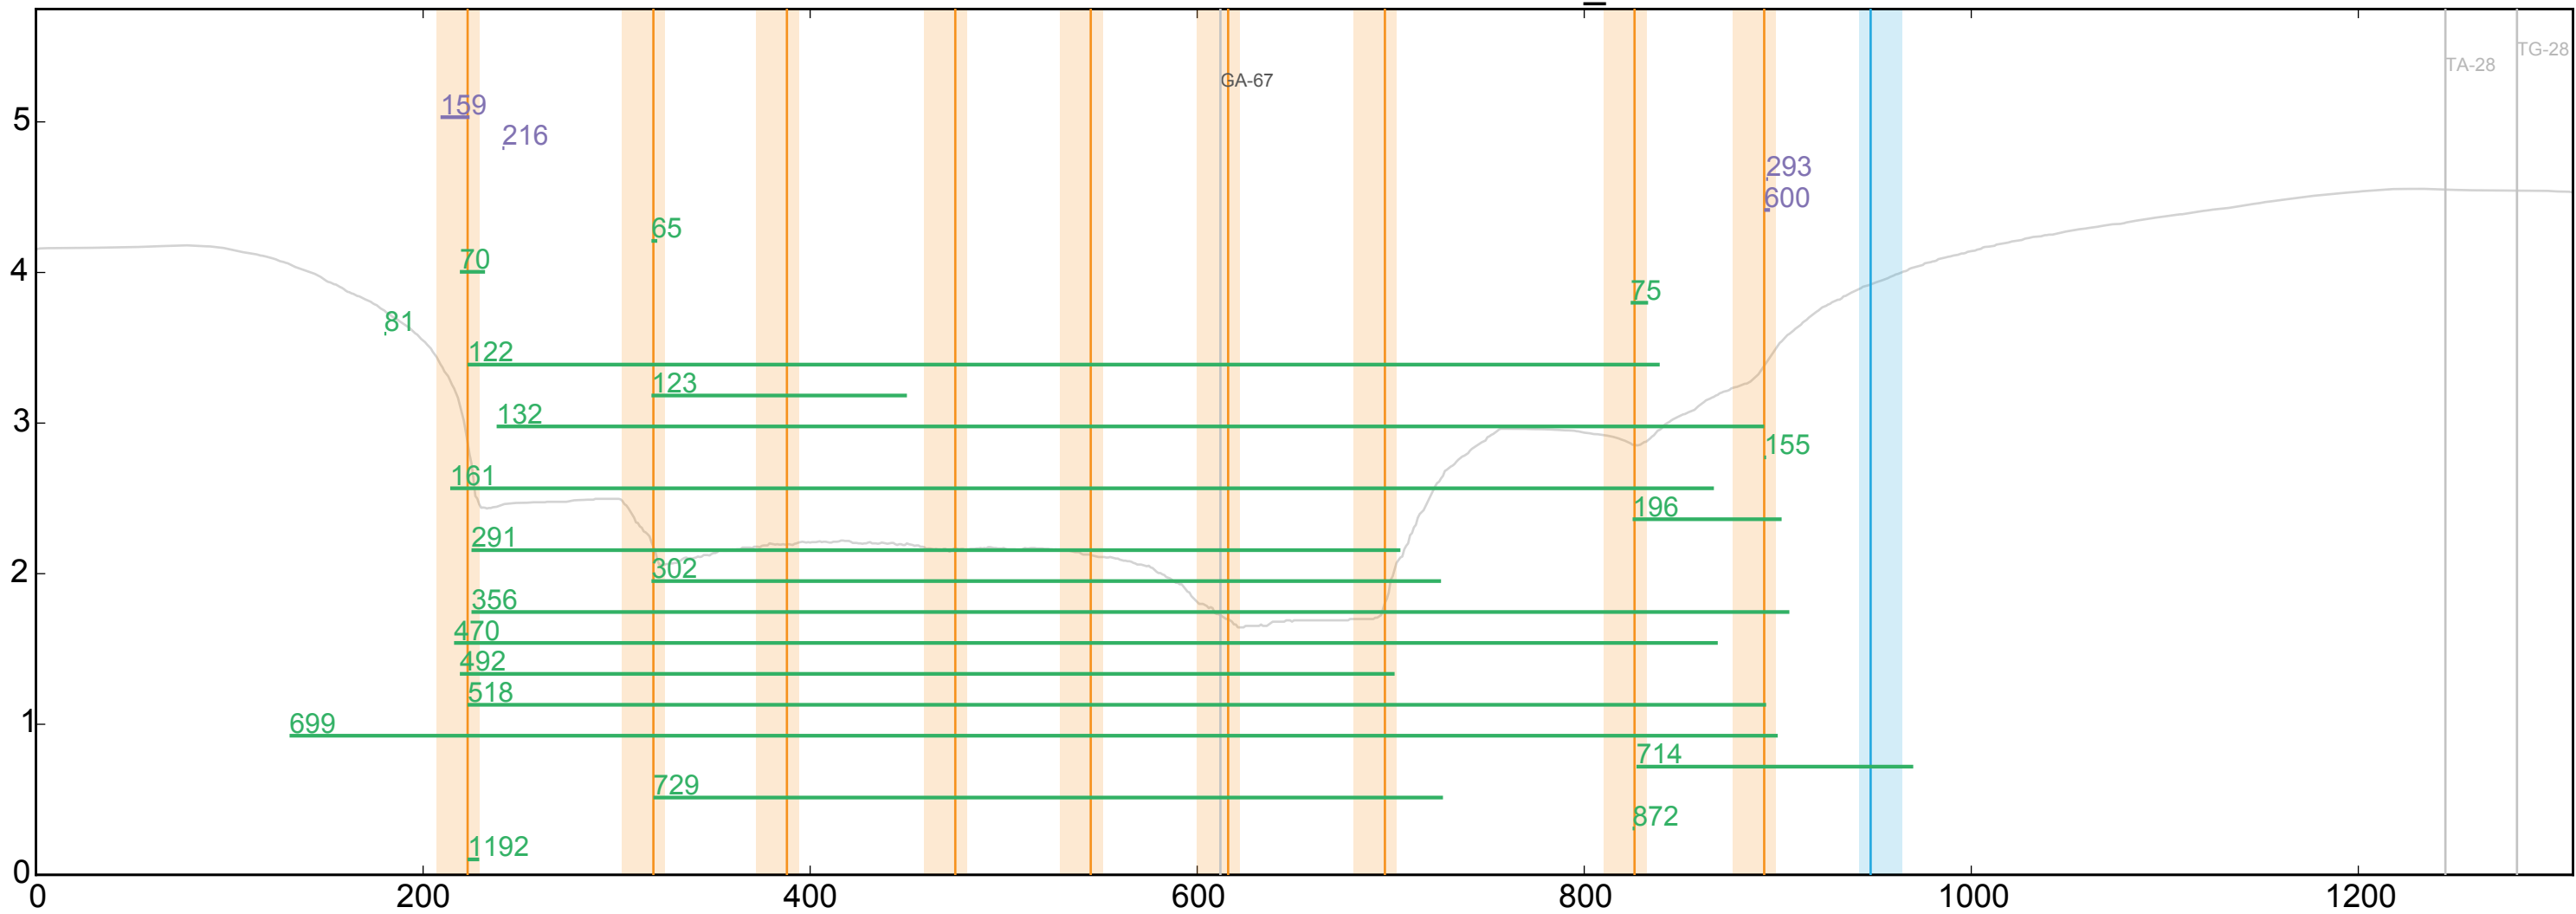

WT ENSDARG00000038458\_3

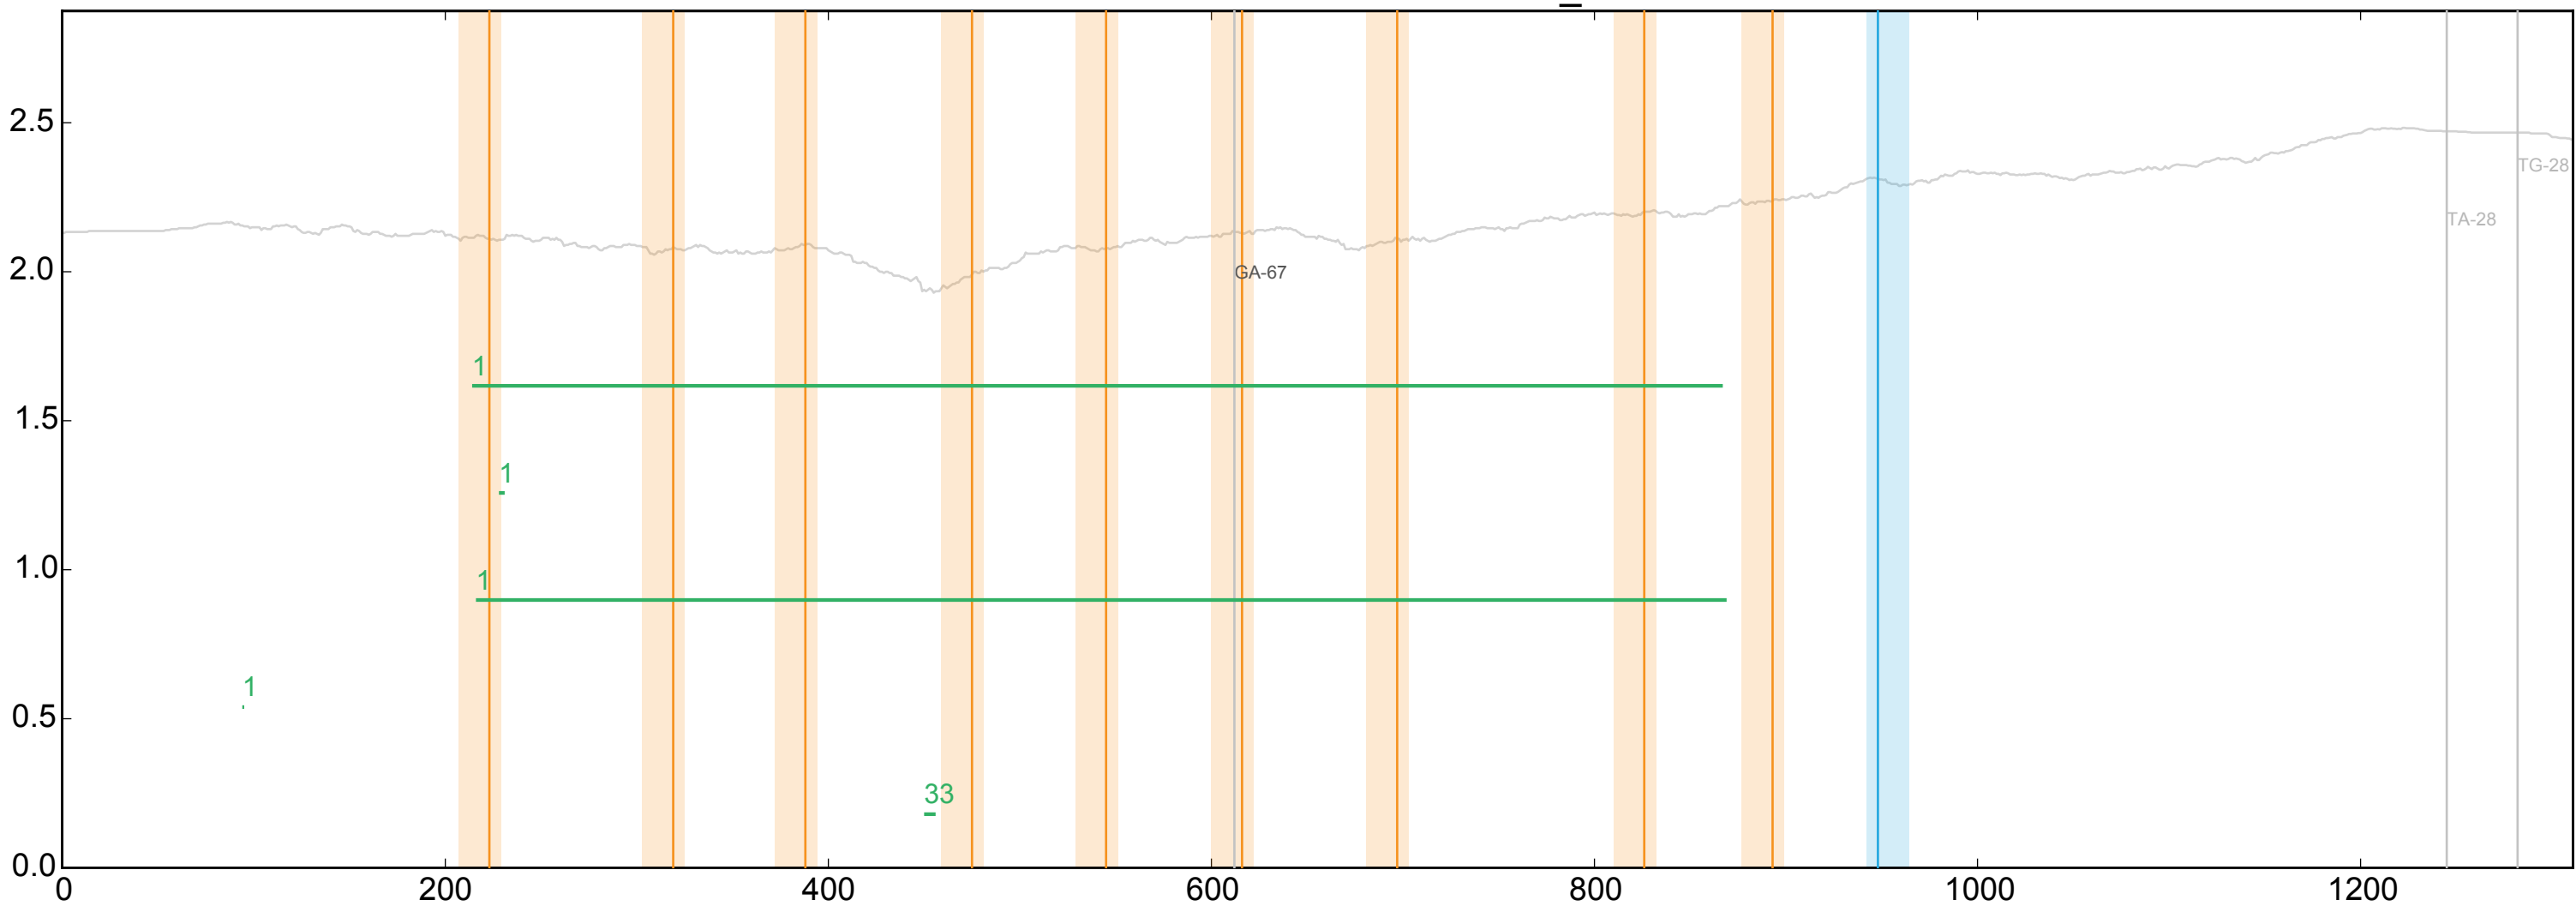

Mutant ENSDARG00000042826\_0

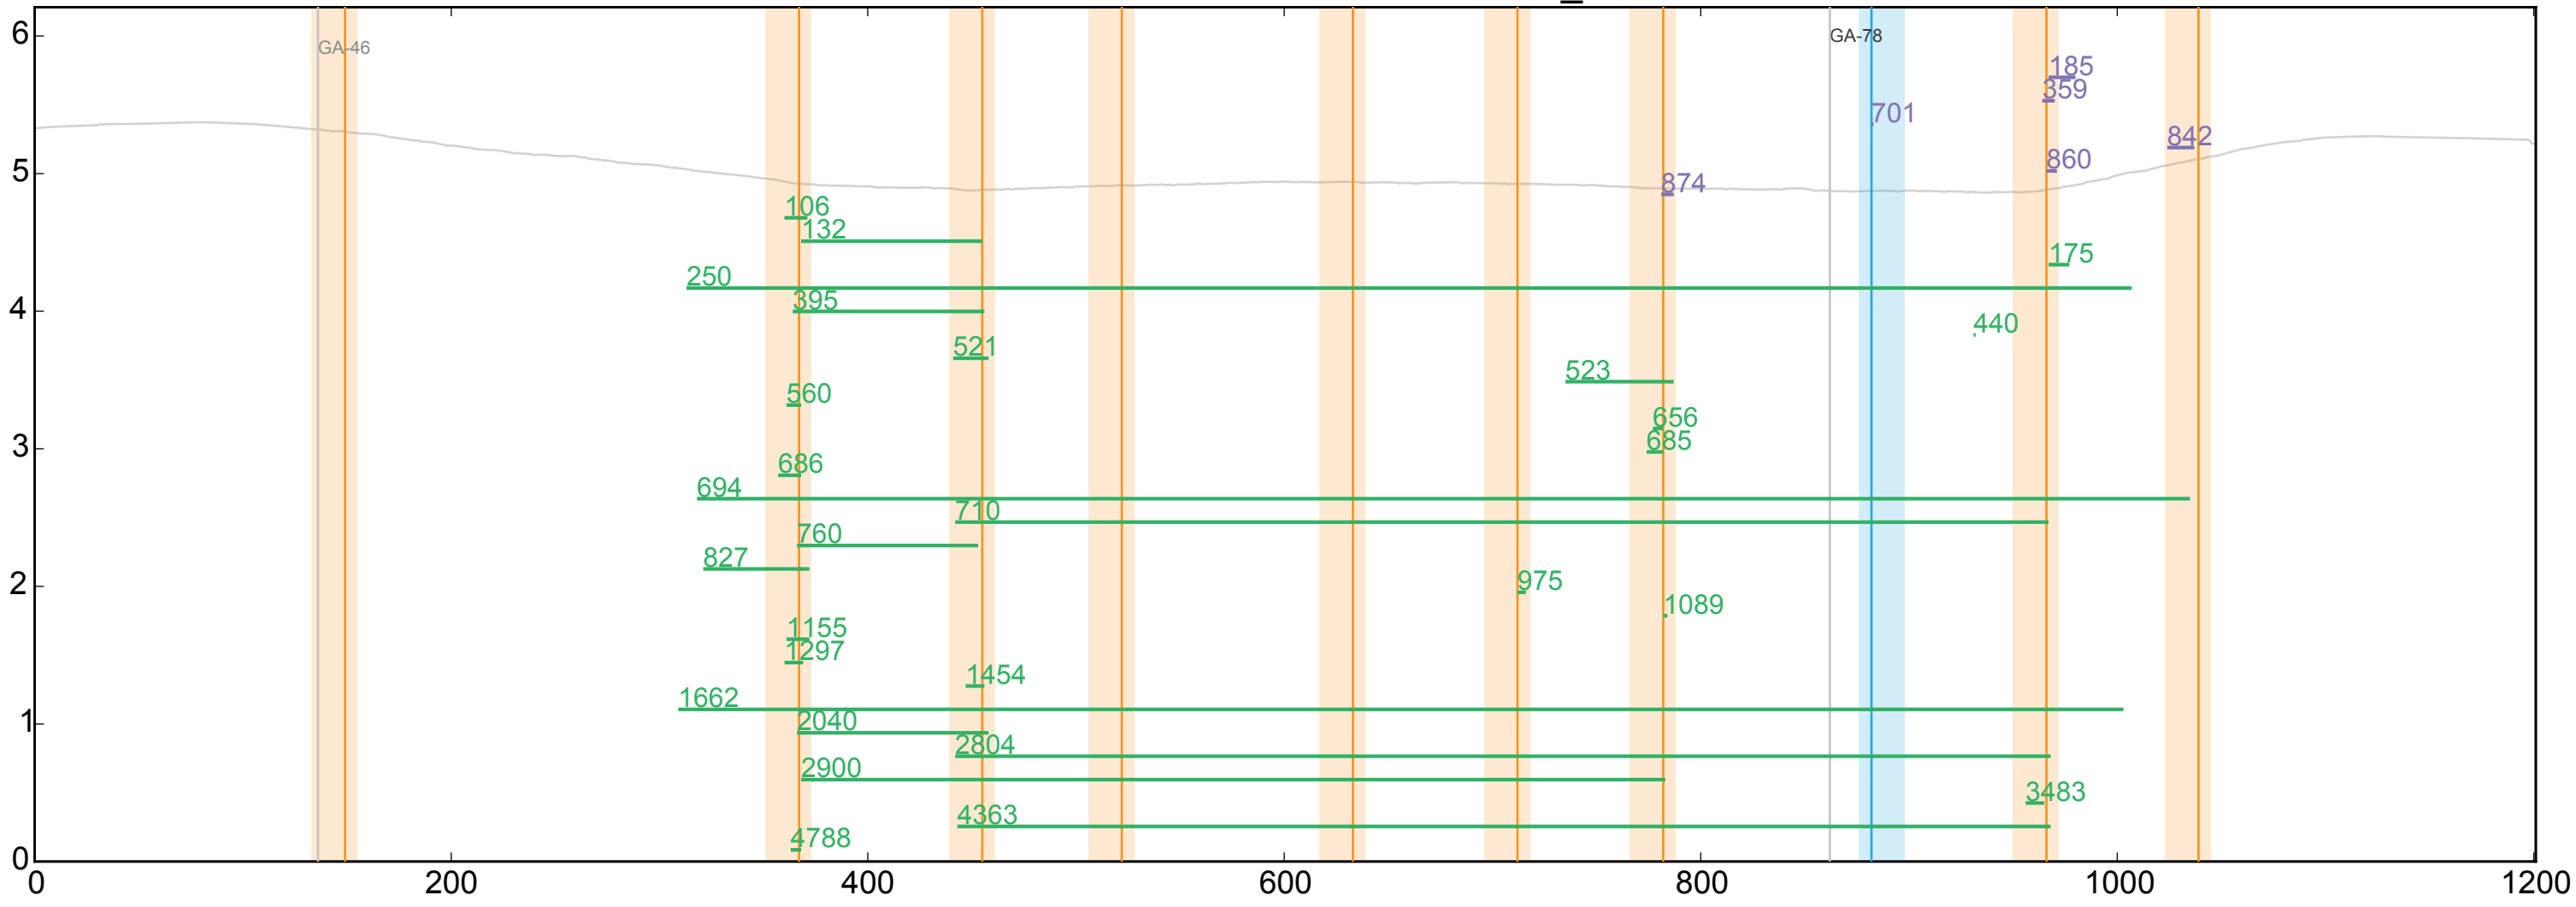

WT ENSDARG00000042826\_0

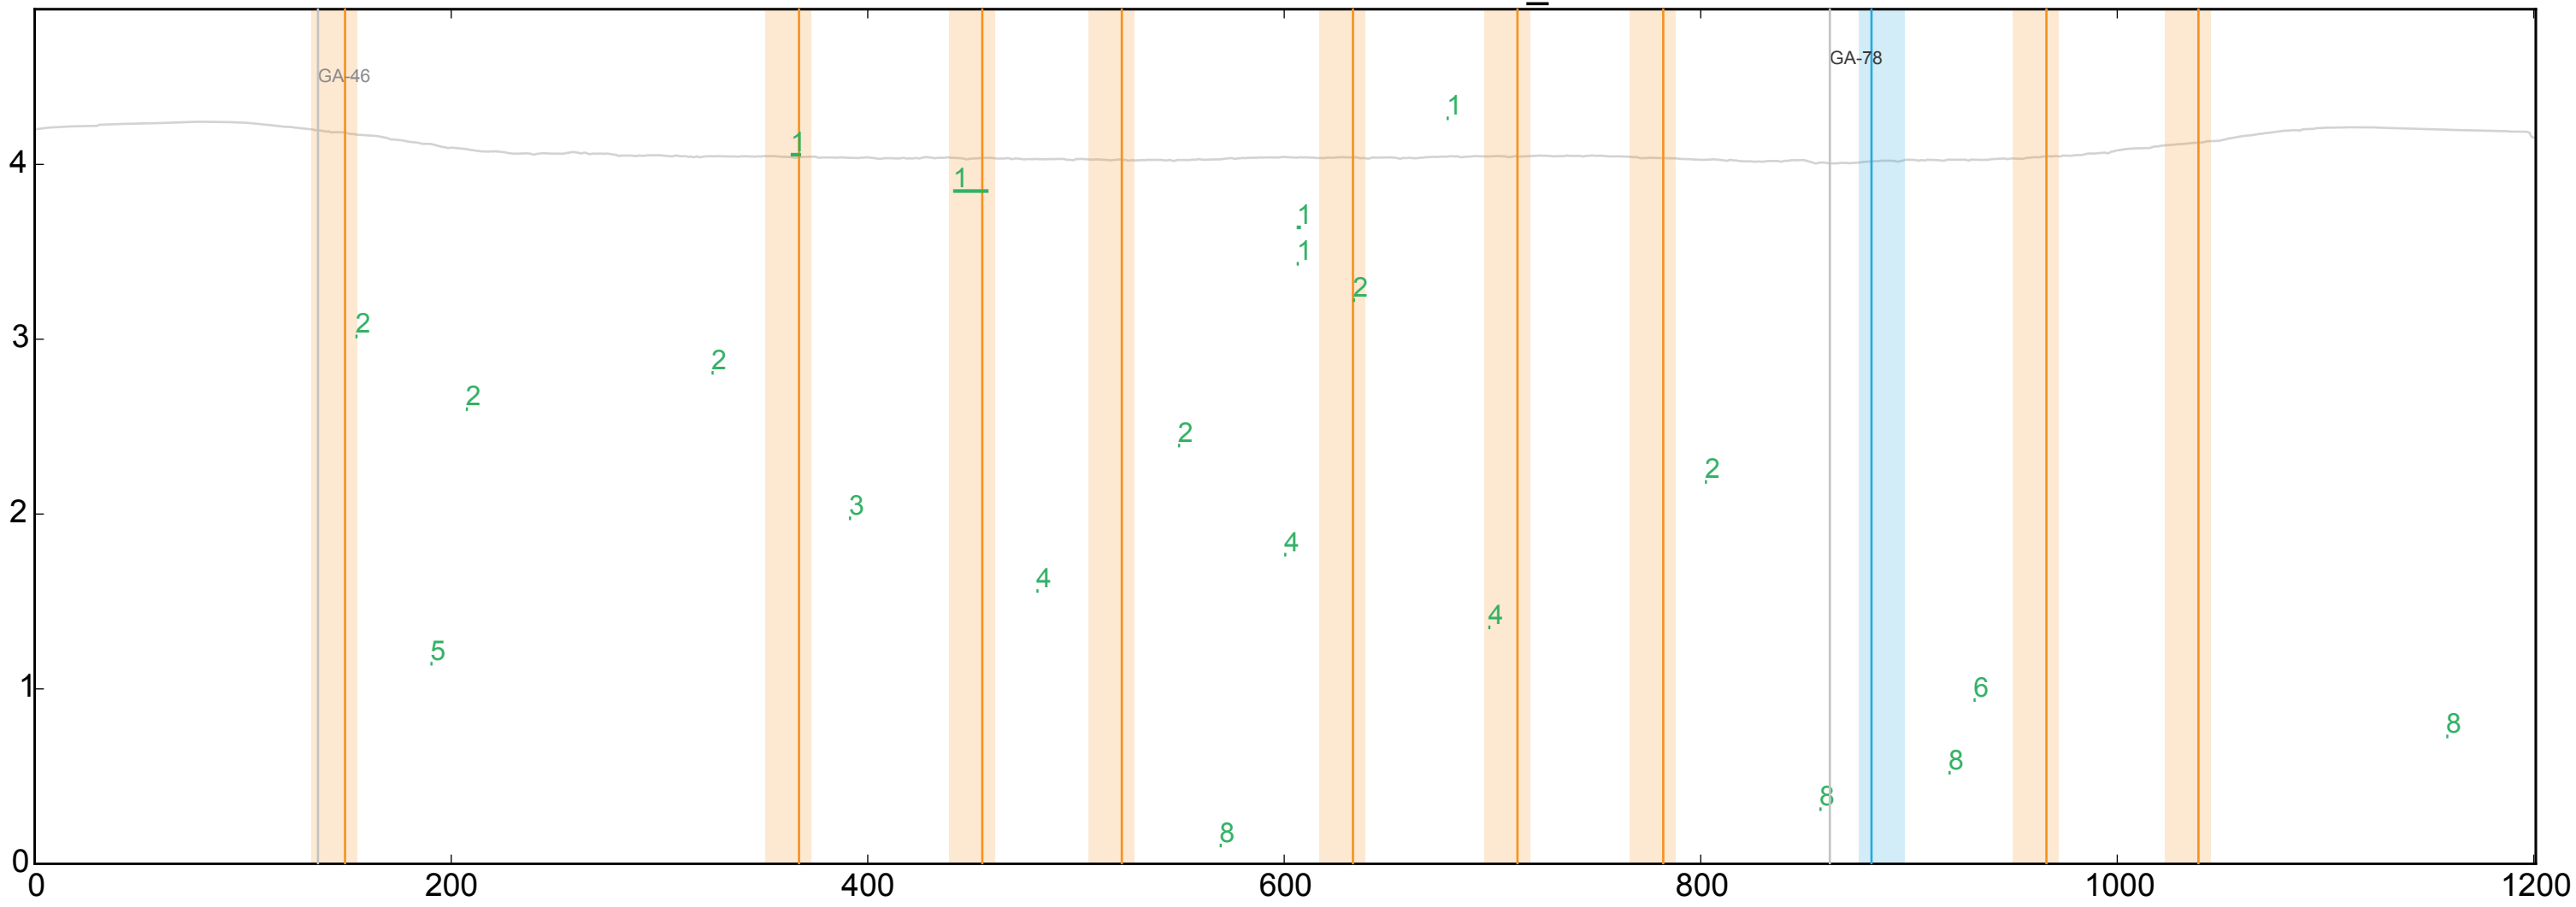

Mutant ENSDARG00000056427\_0

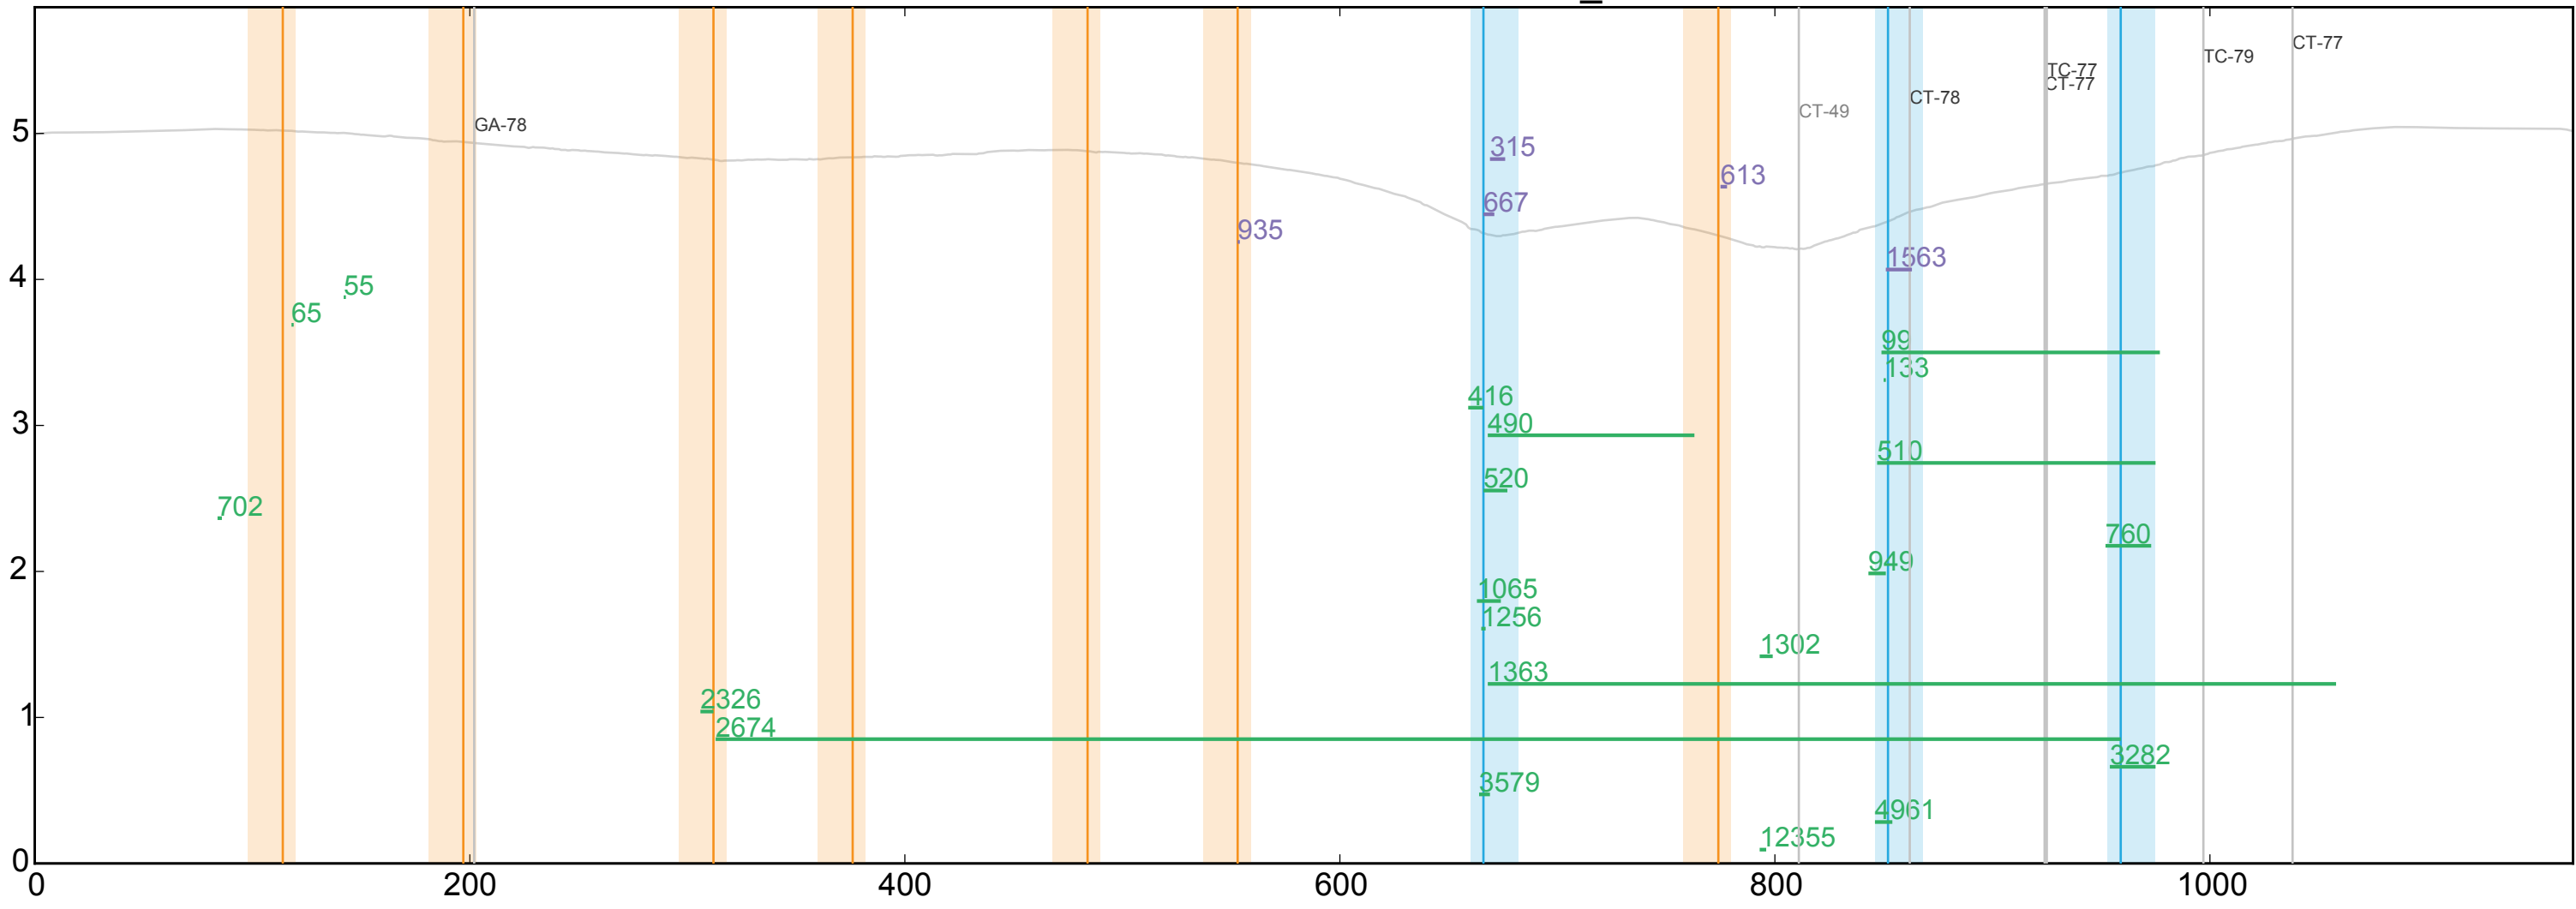

WT ENSDARG00000056427\_0

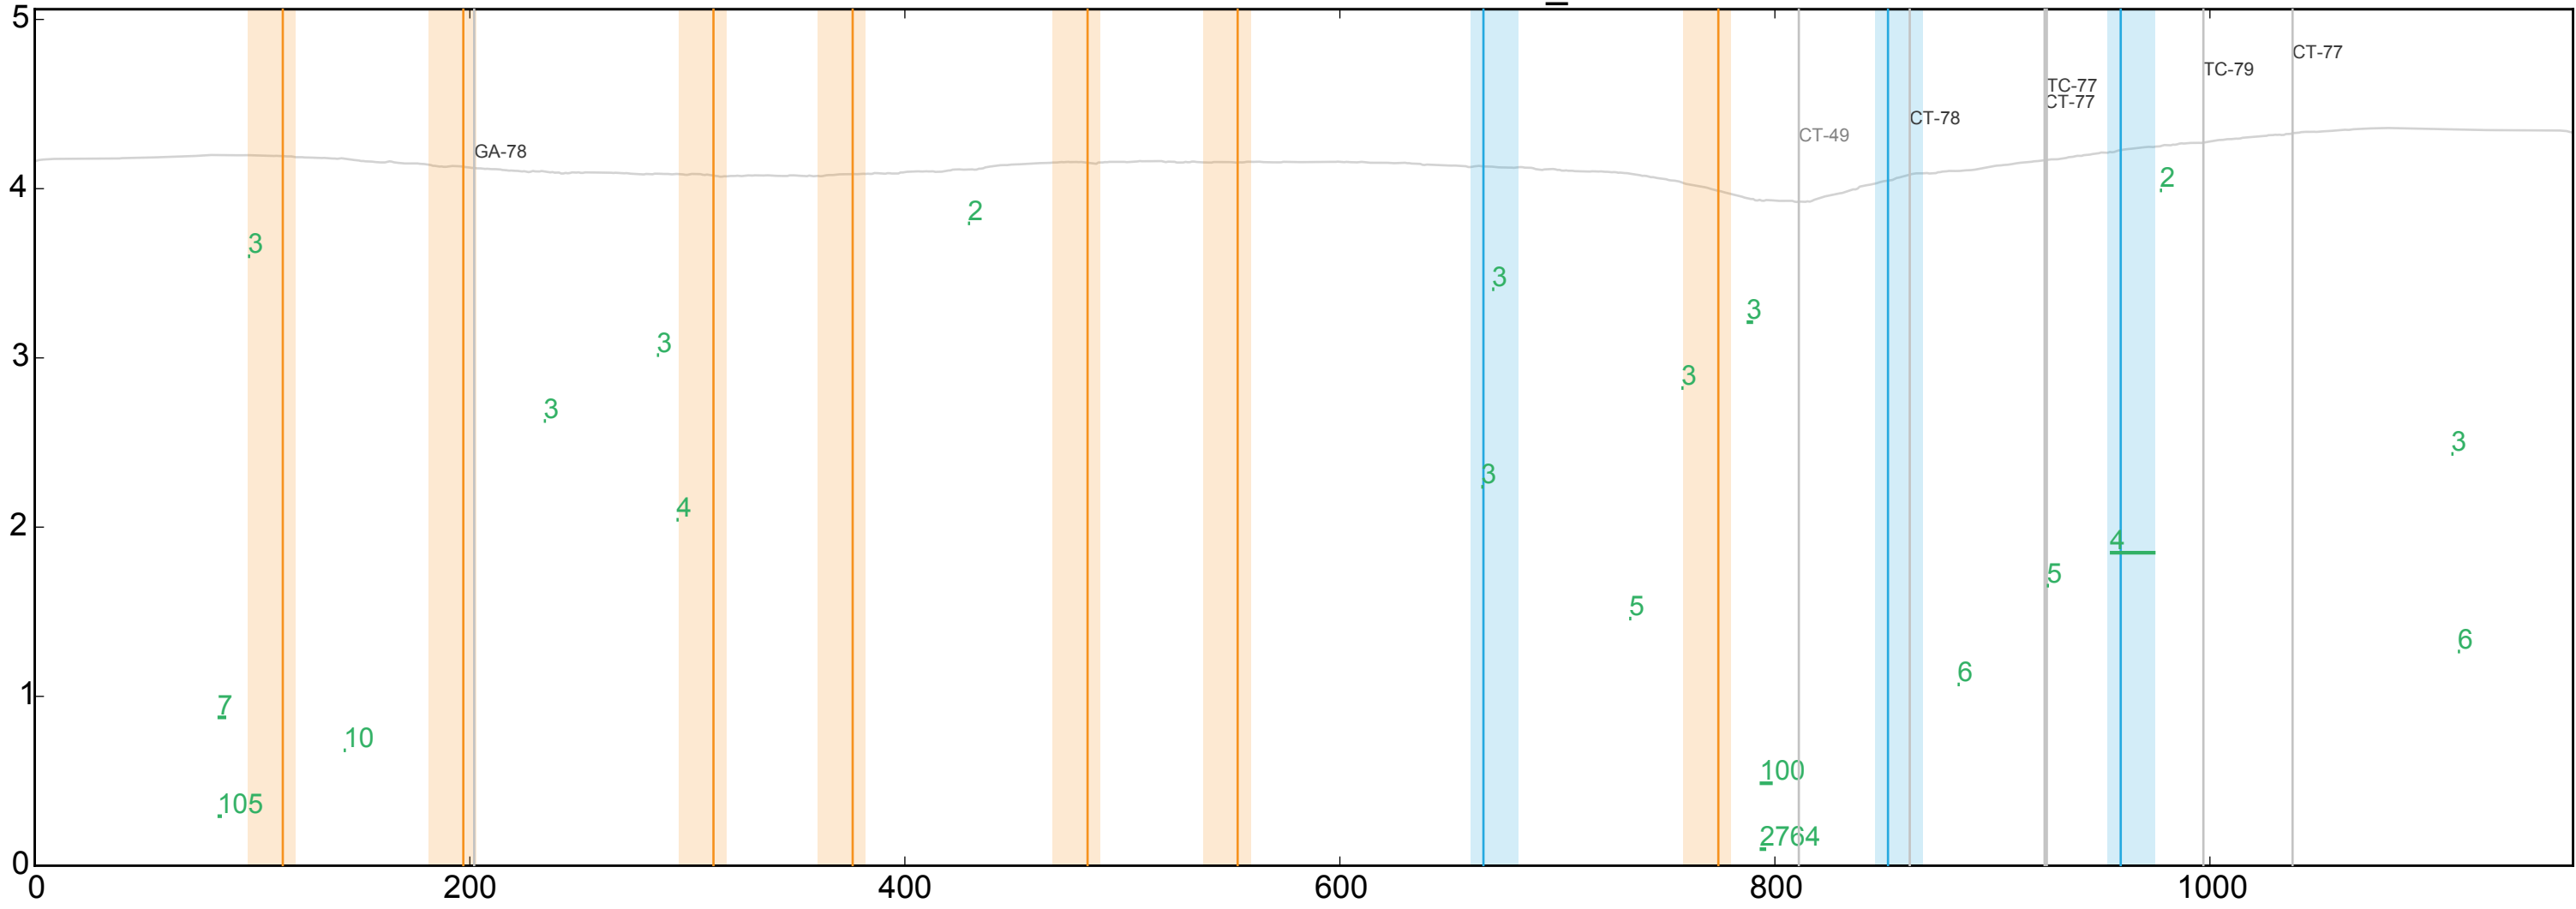

Mutant ENSDARG00000060539\_0

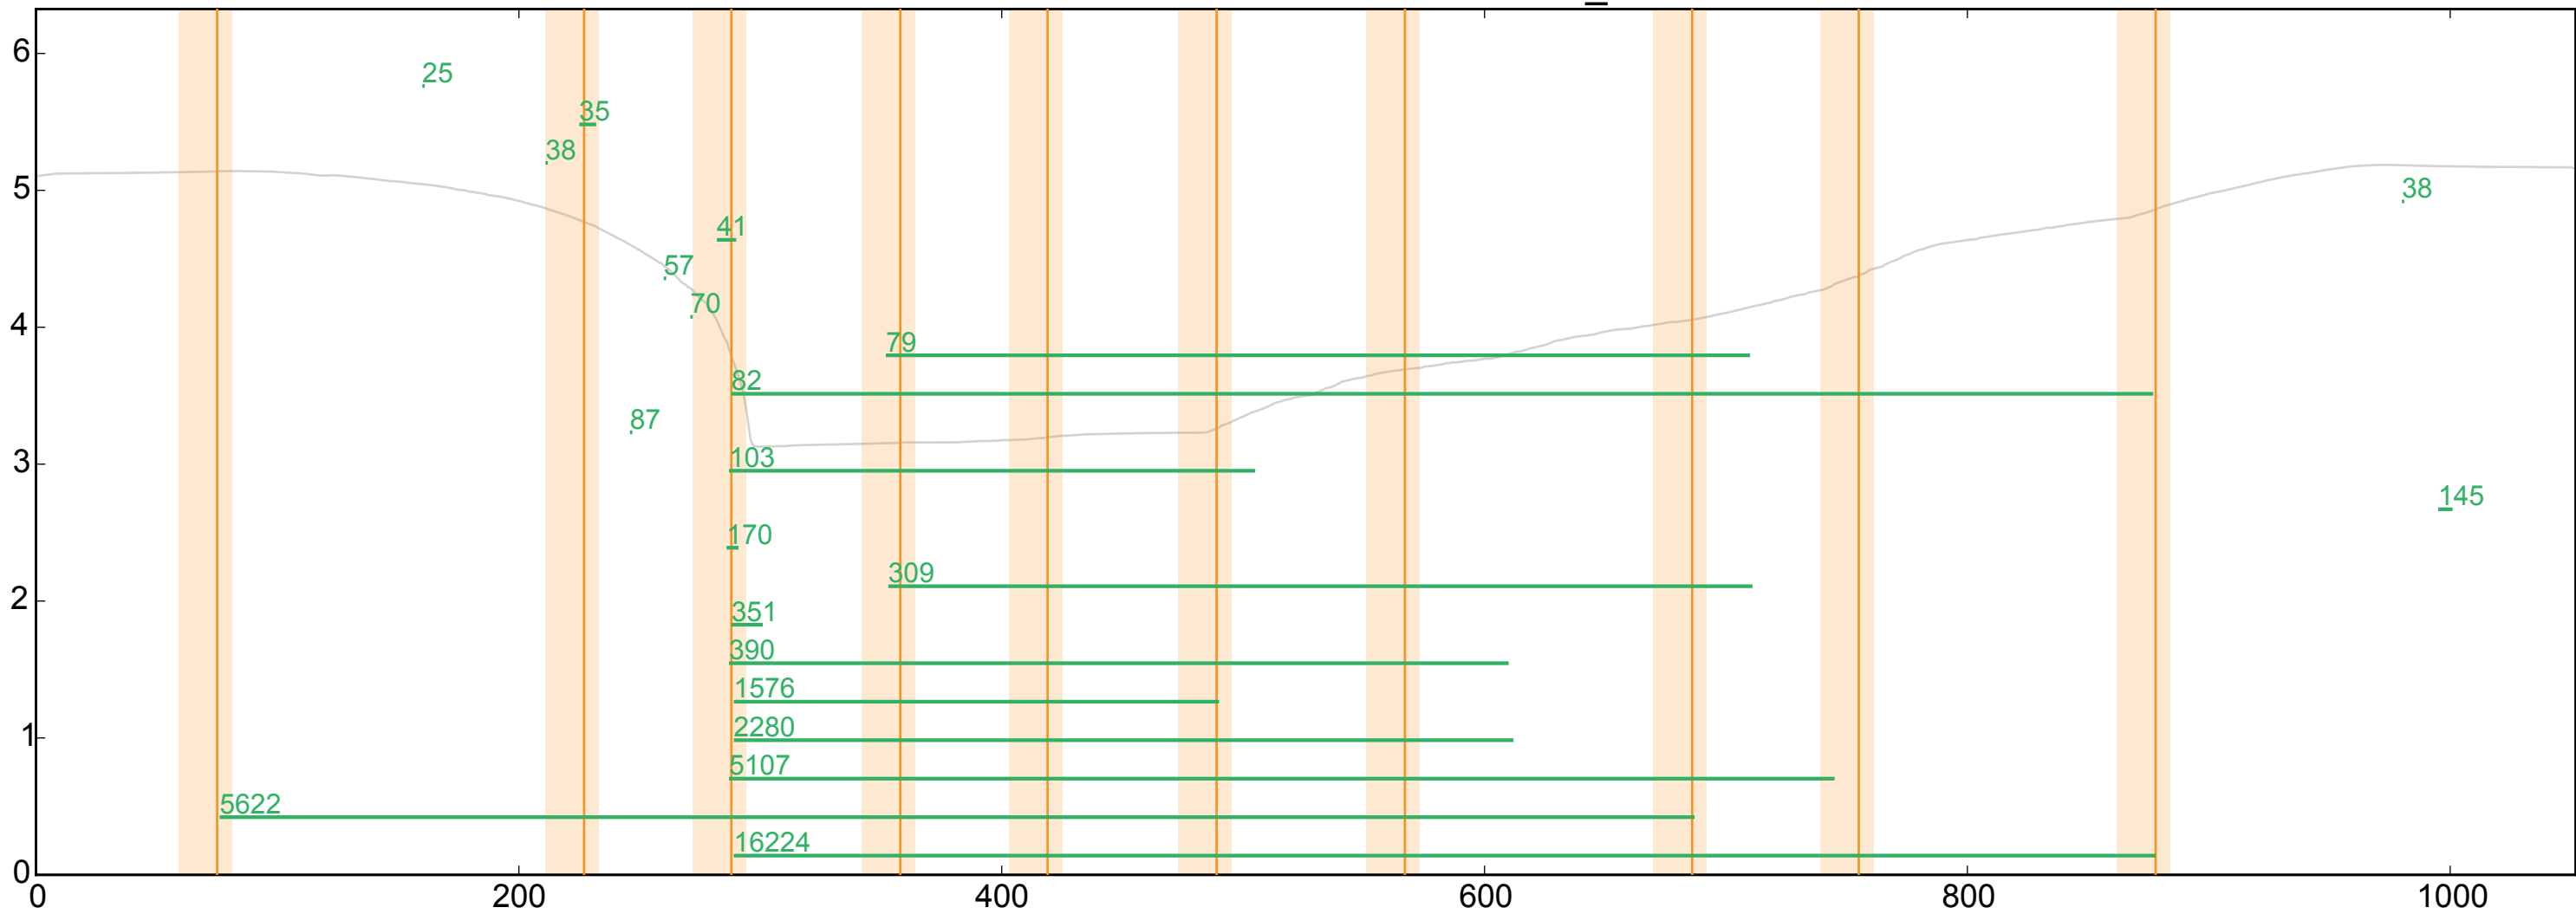

WT ENSDARG00000060539\_0

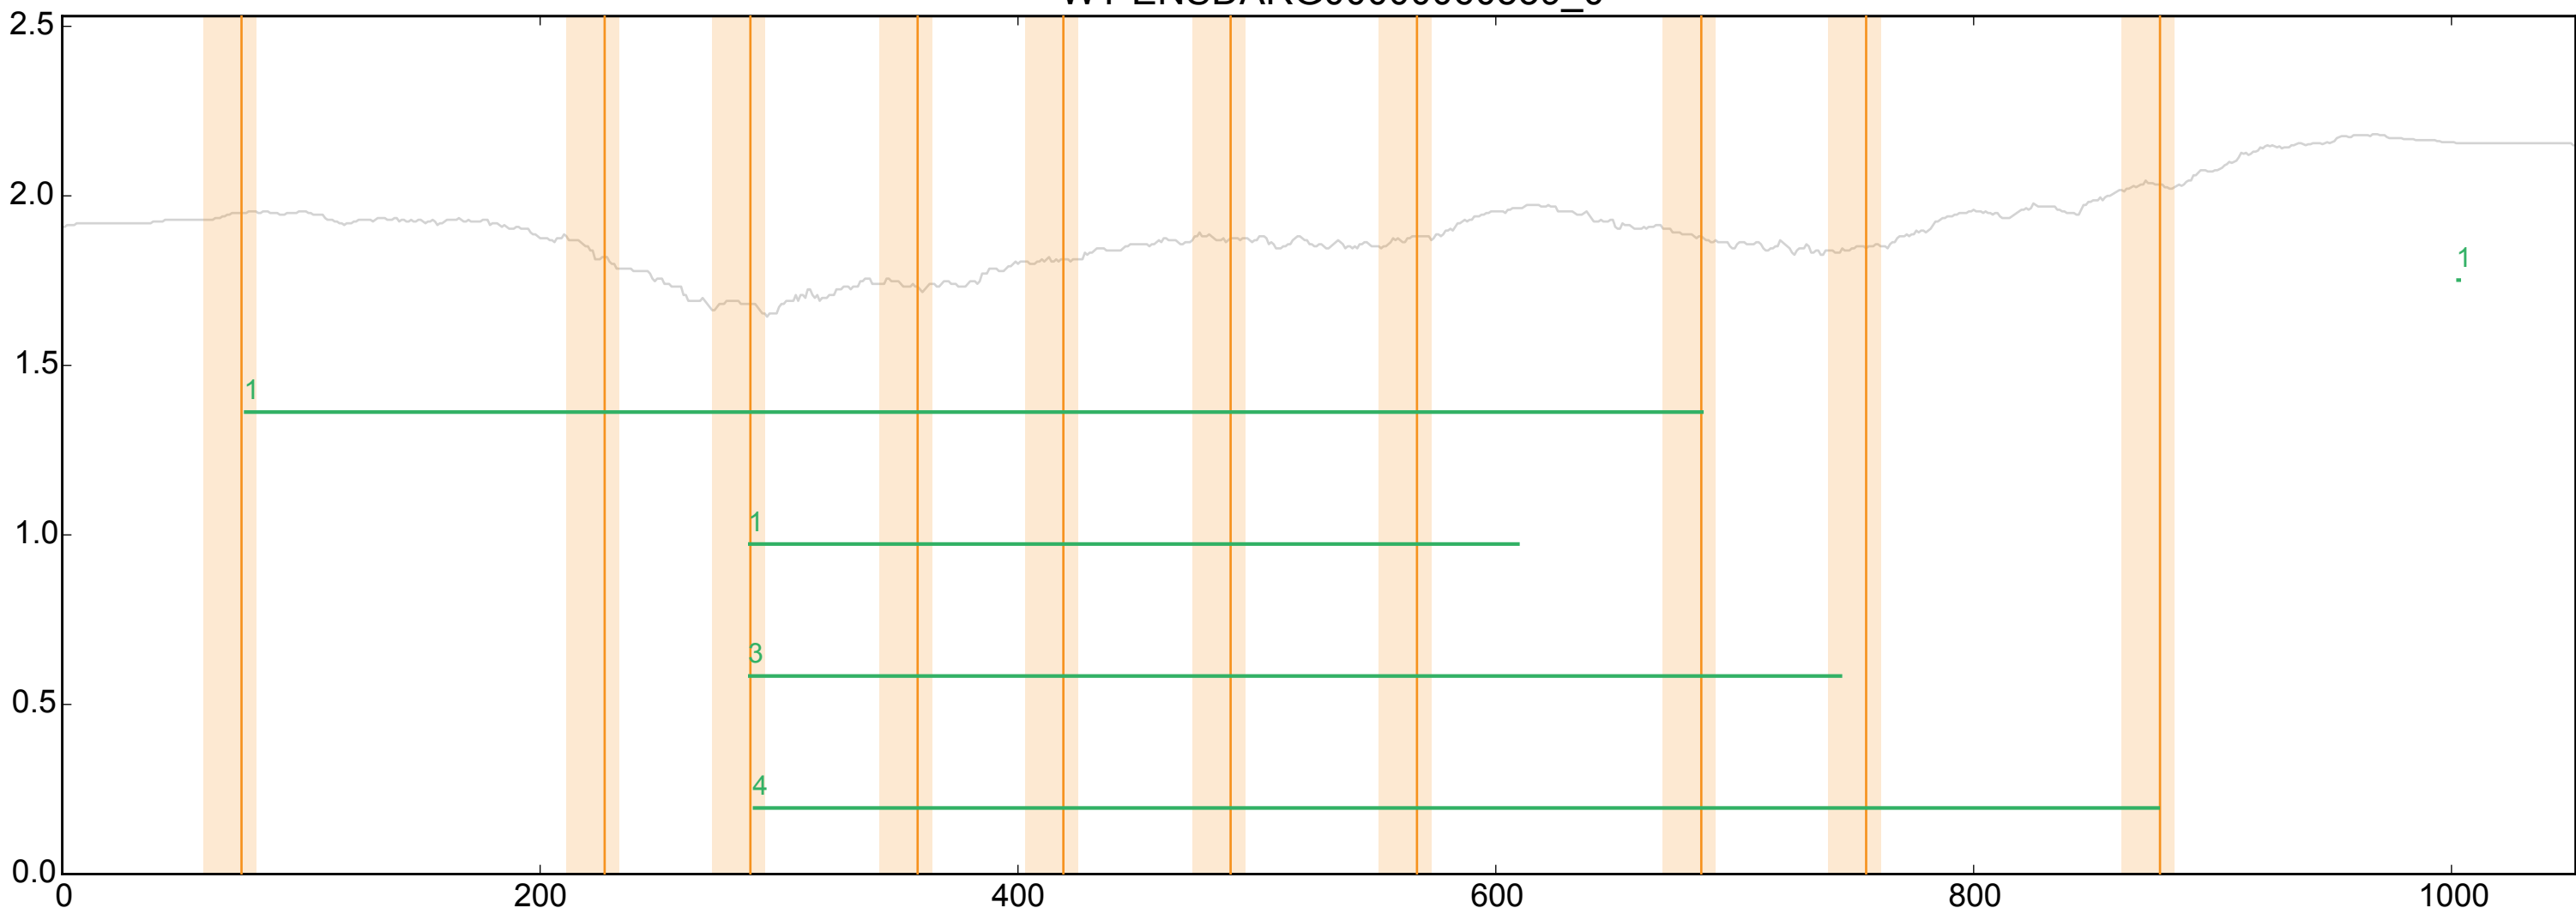

Mutant ENSDARG00000074919\_0

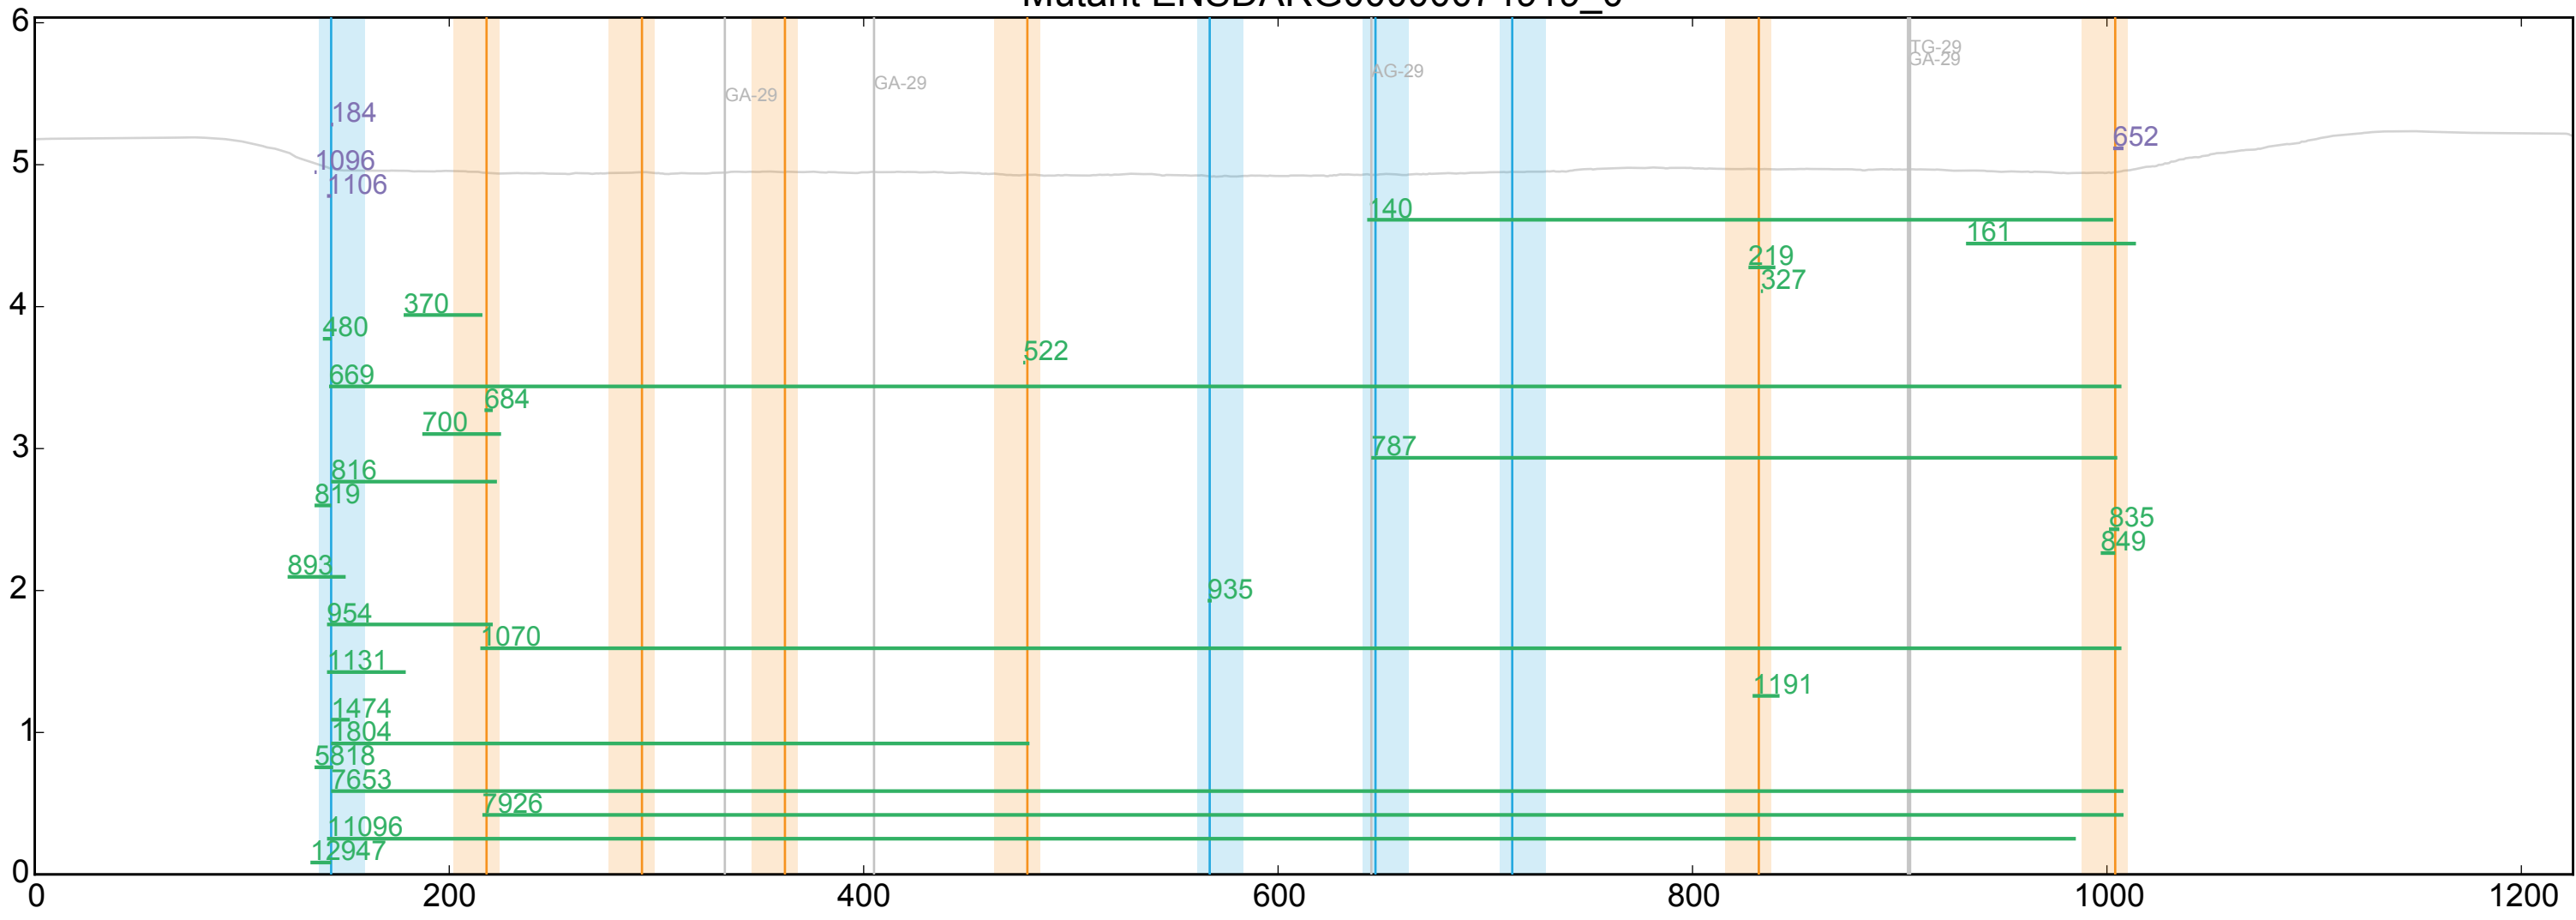

WT ENSDARG00000074919\_0

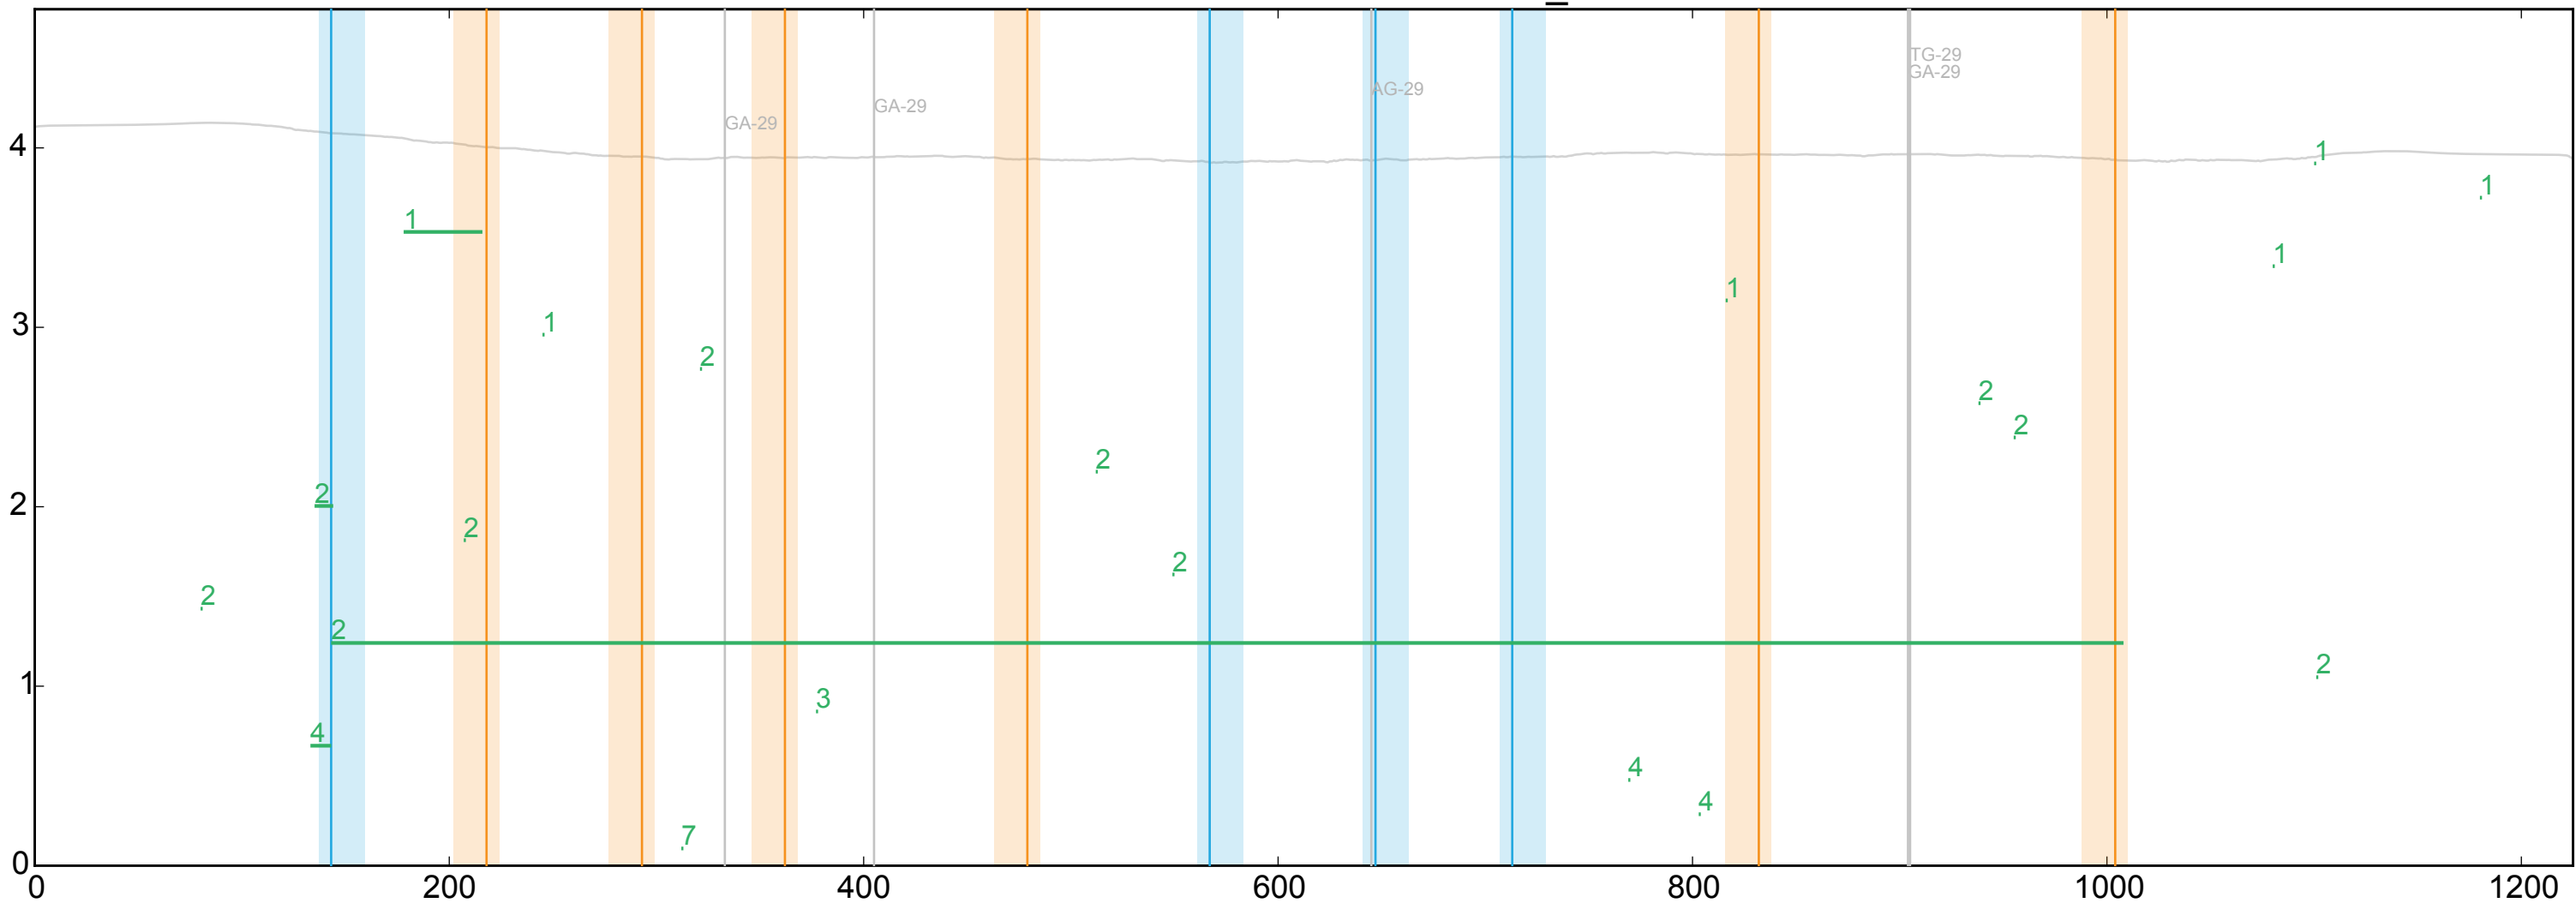

Mutant ENSDARG00000088484\_0

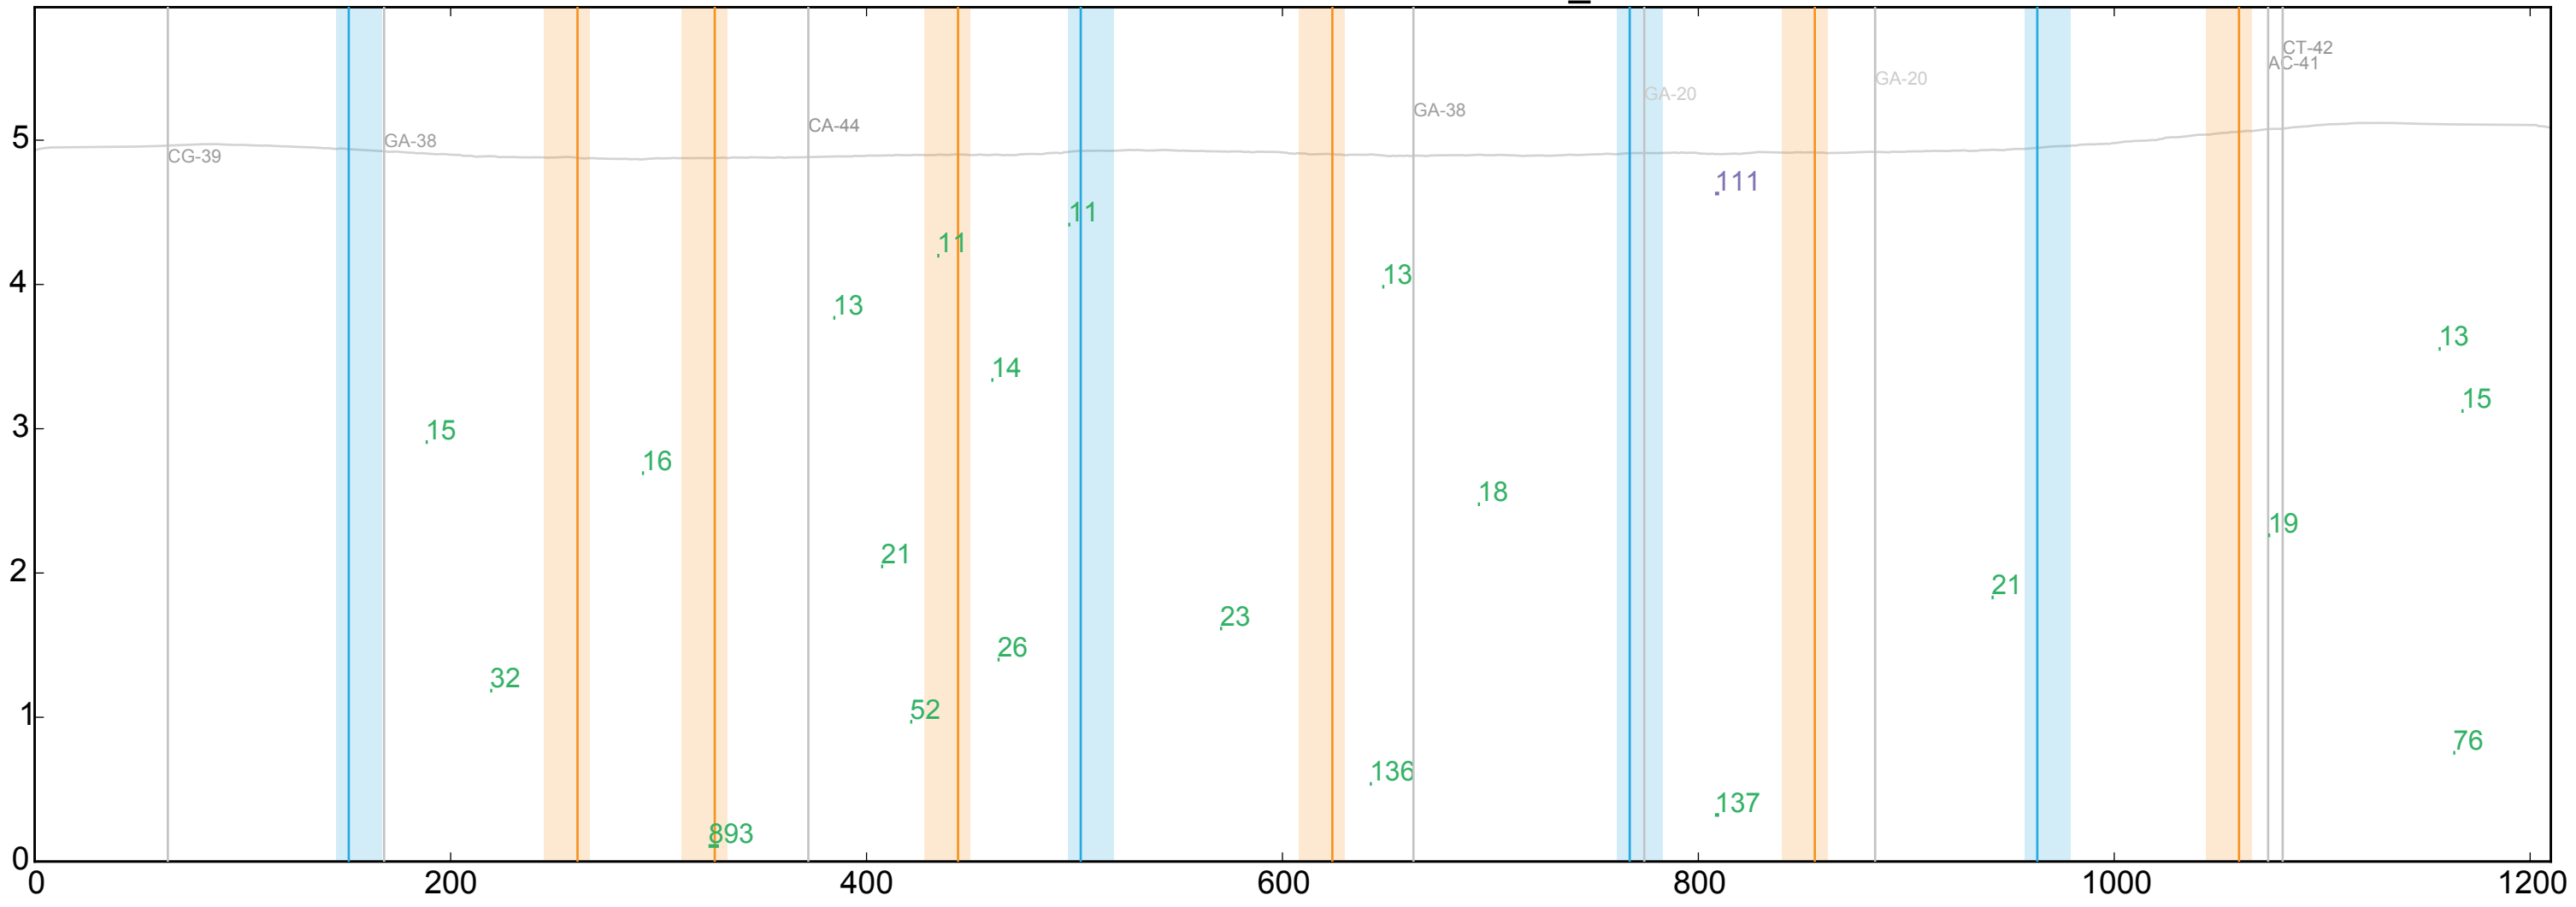

WT ENSDARG00000088484\_0

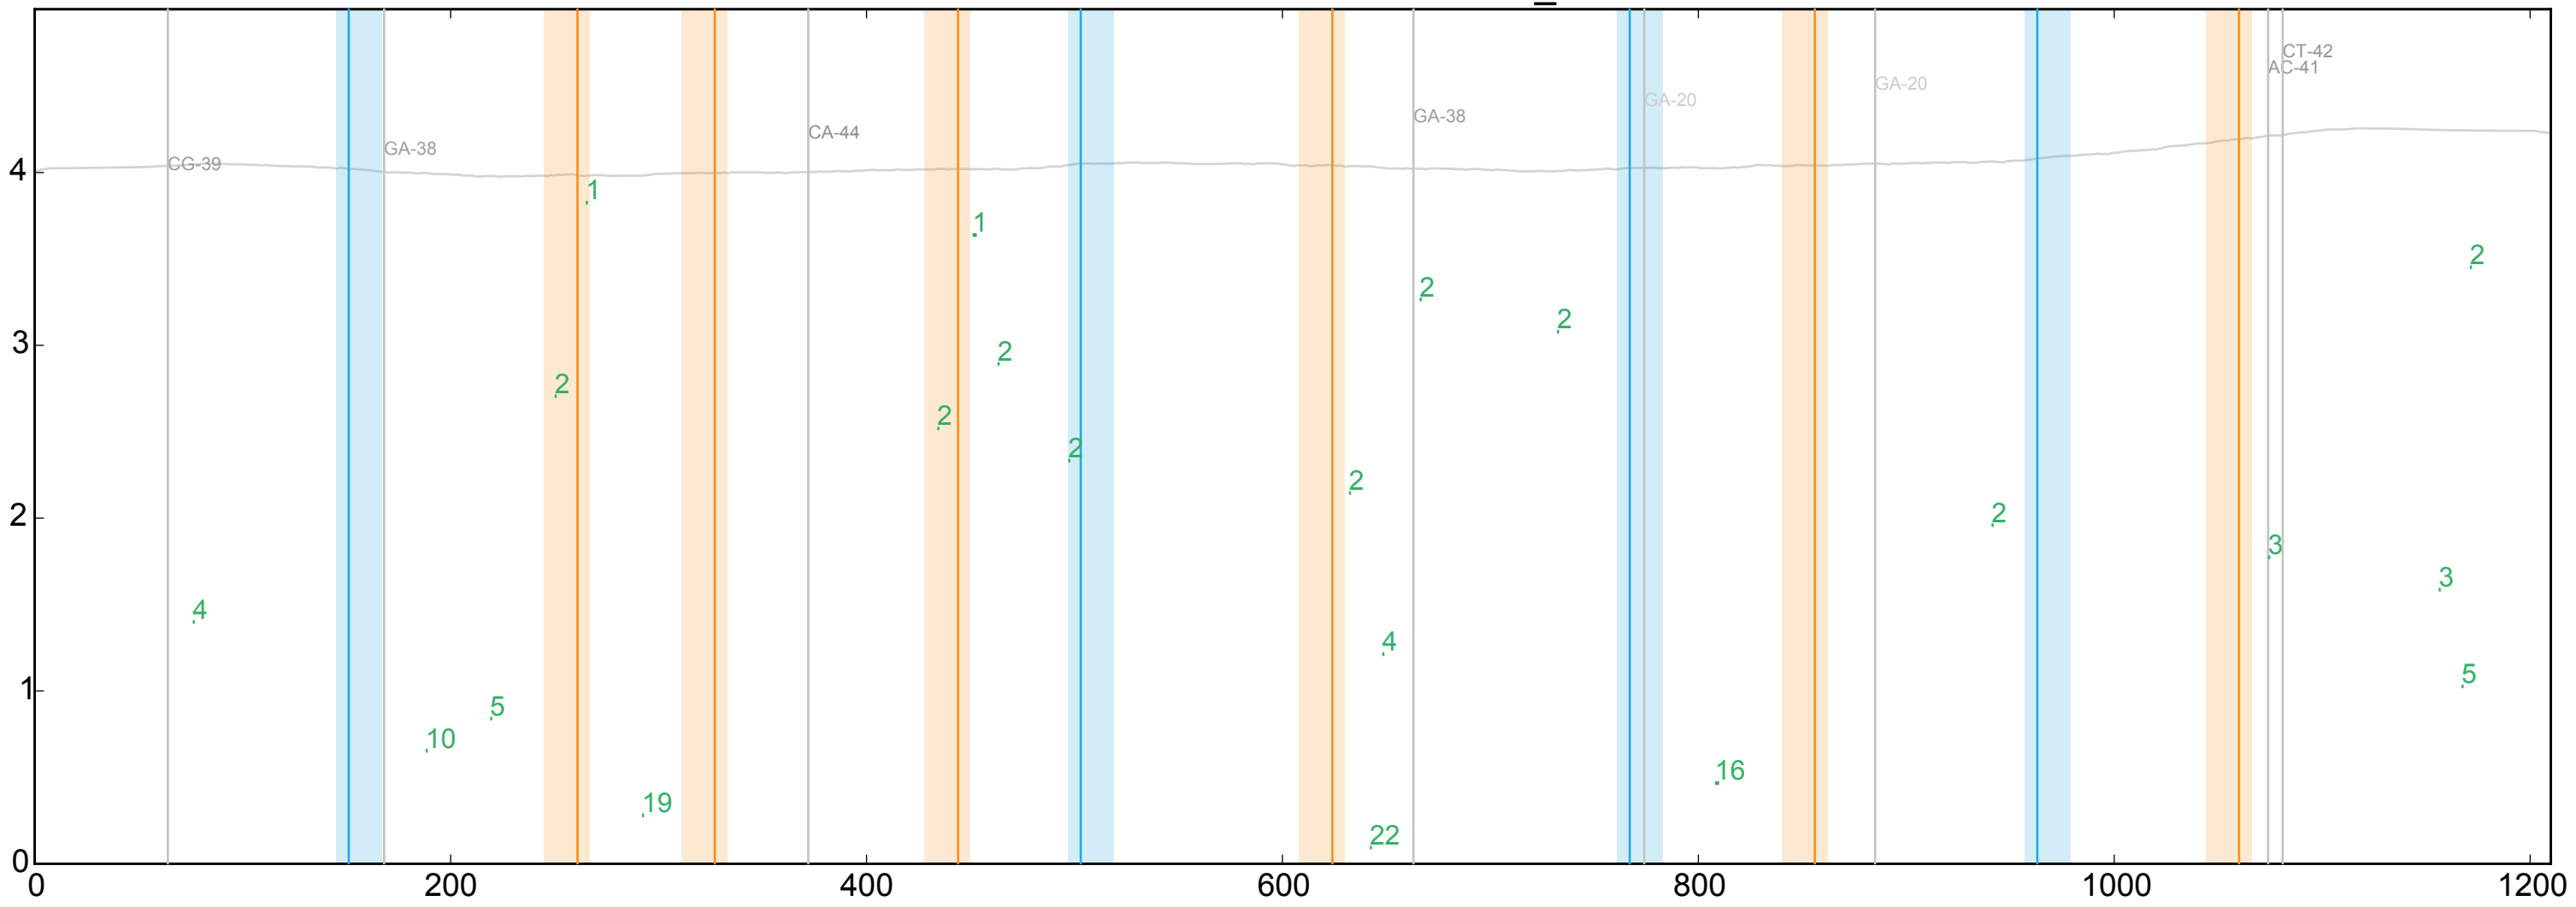



Mutant ENSDARG00000076657\_0

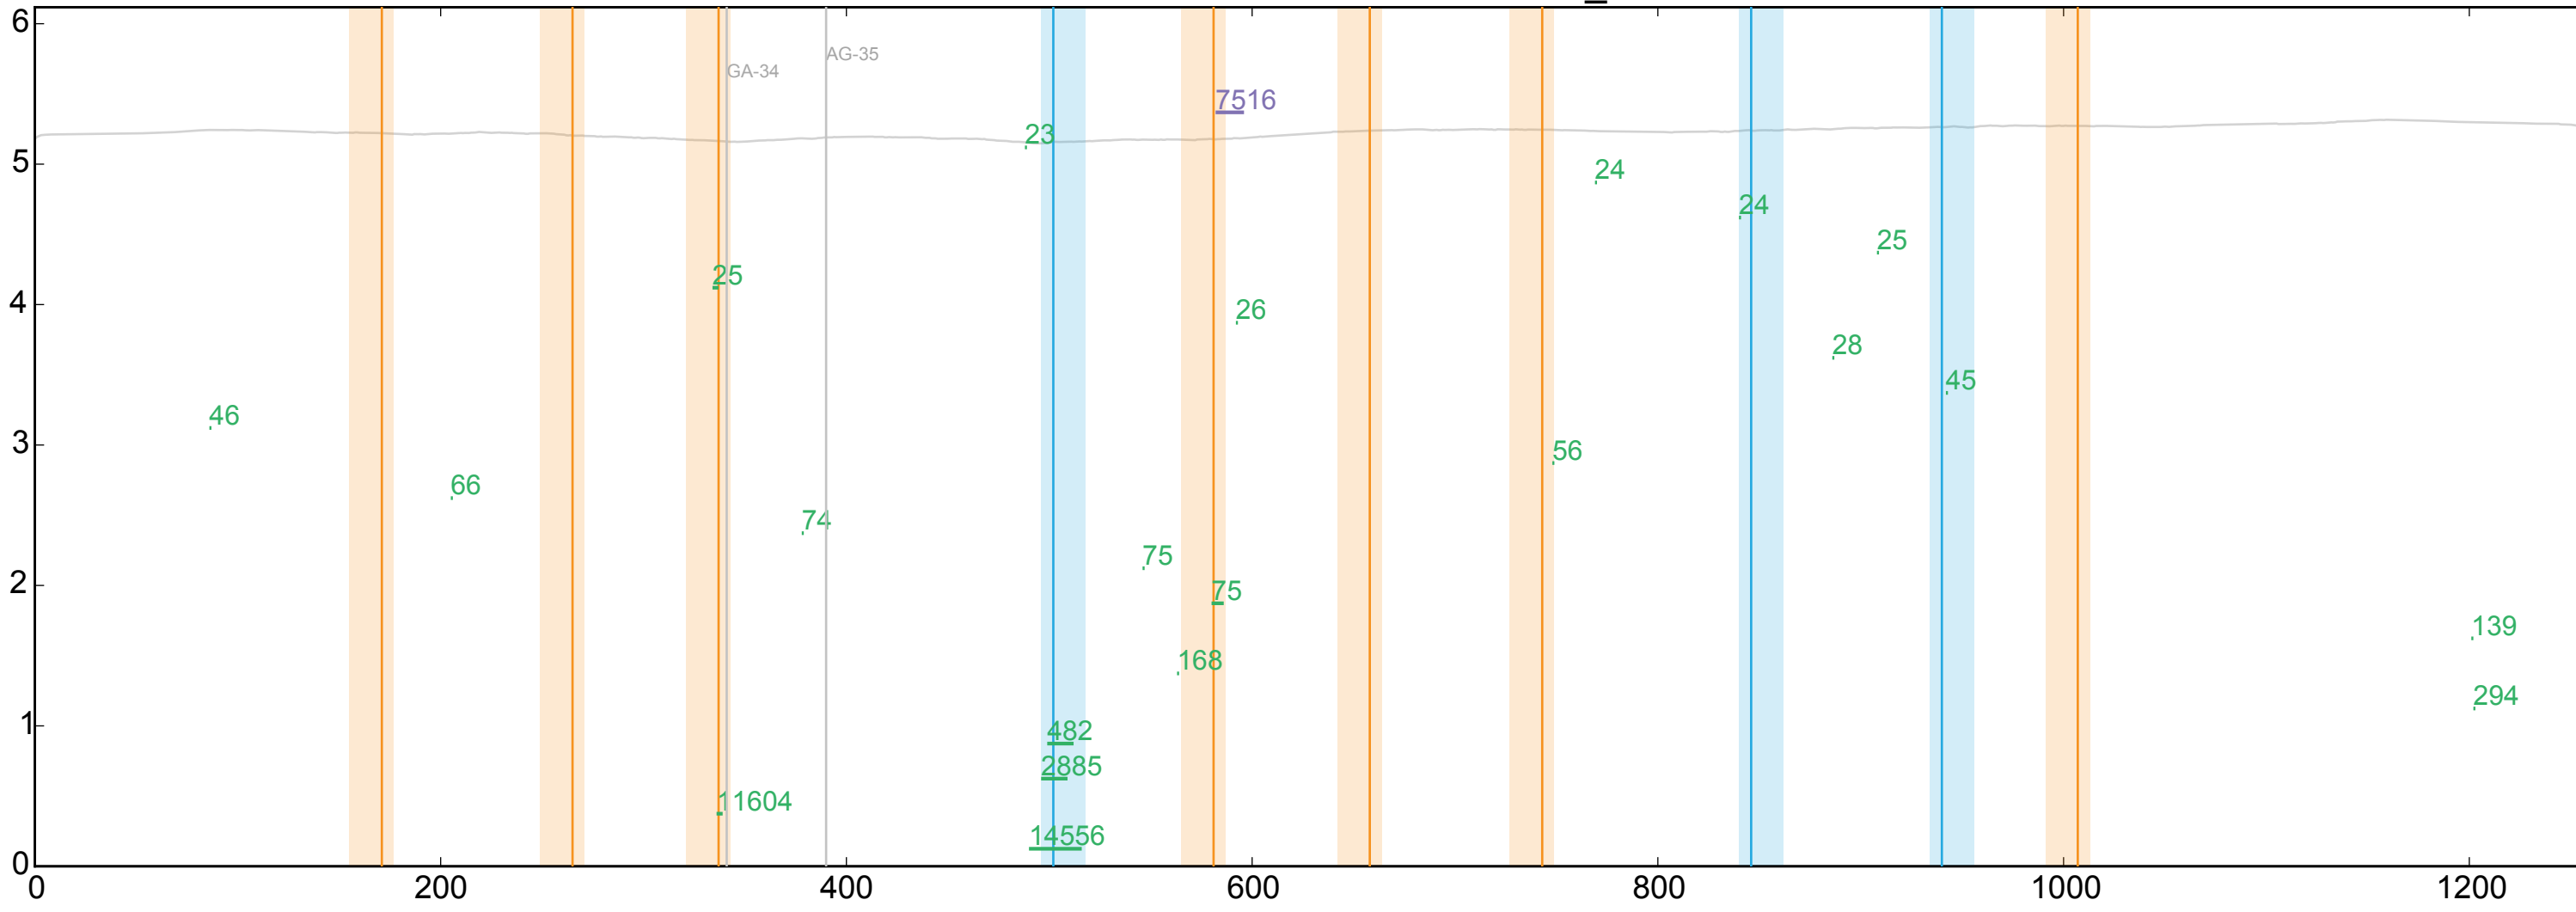

WT ENSDARG00000076657\_0

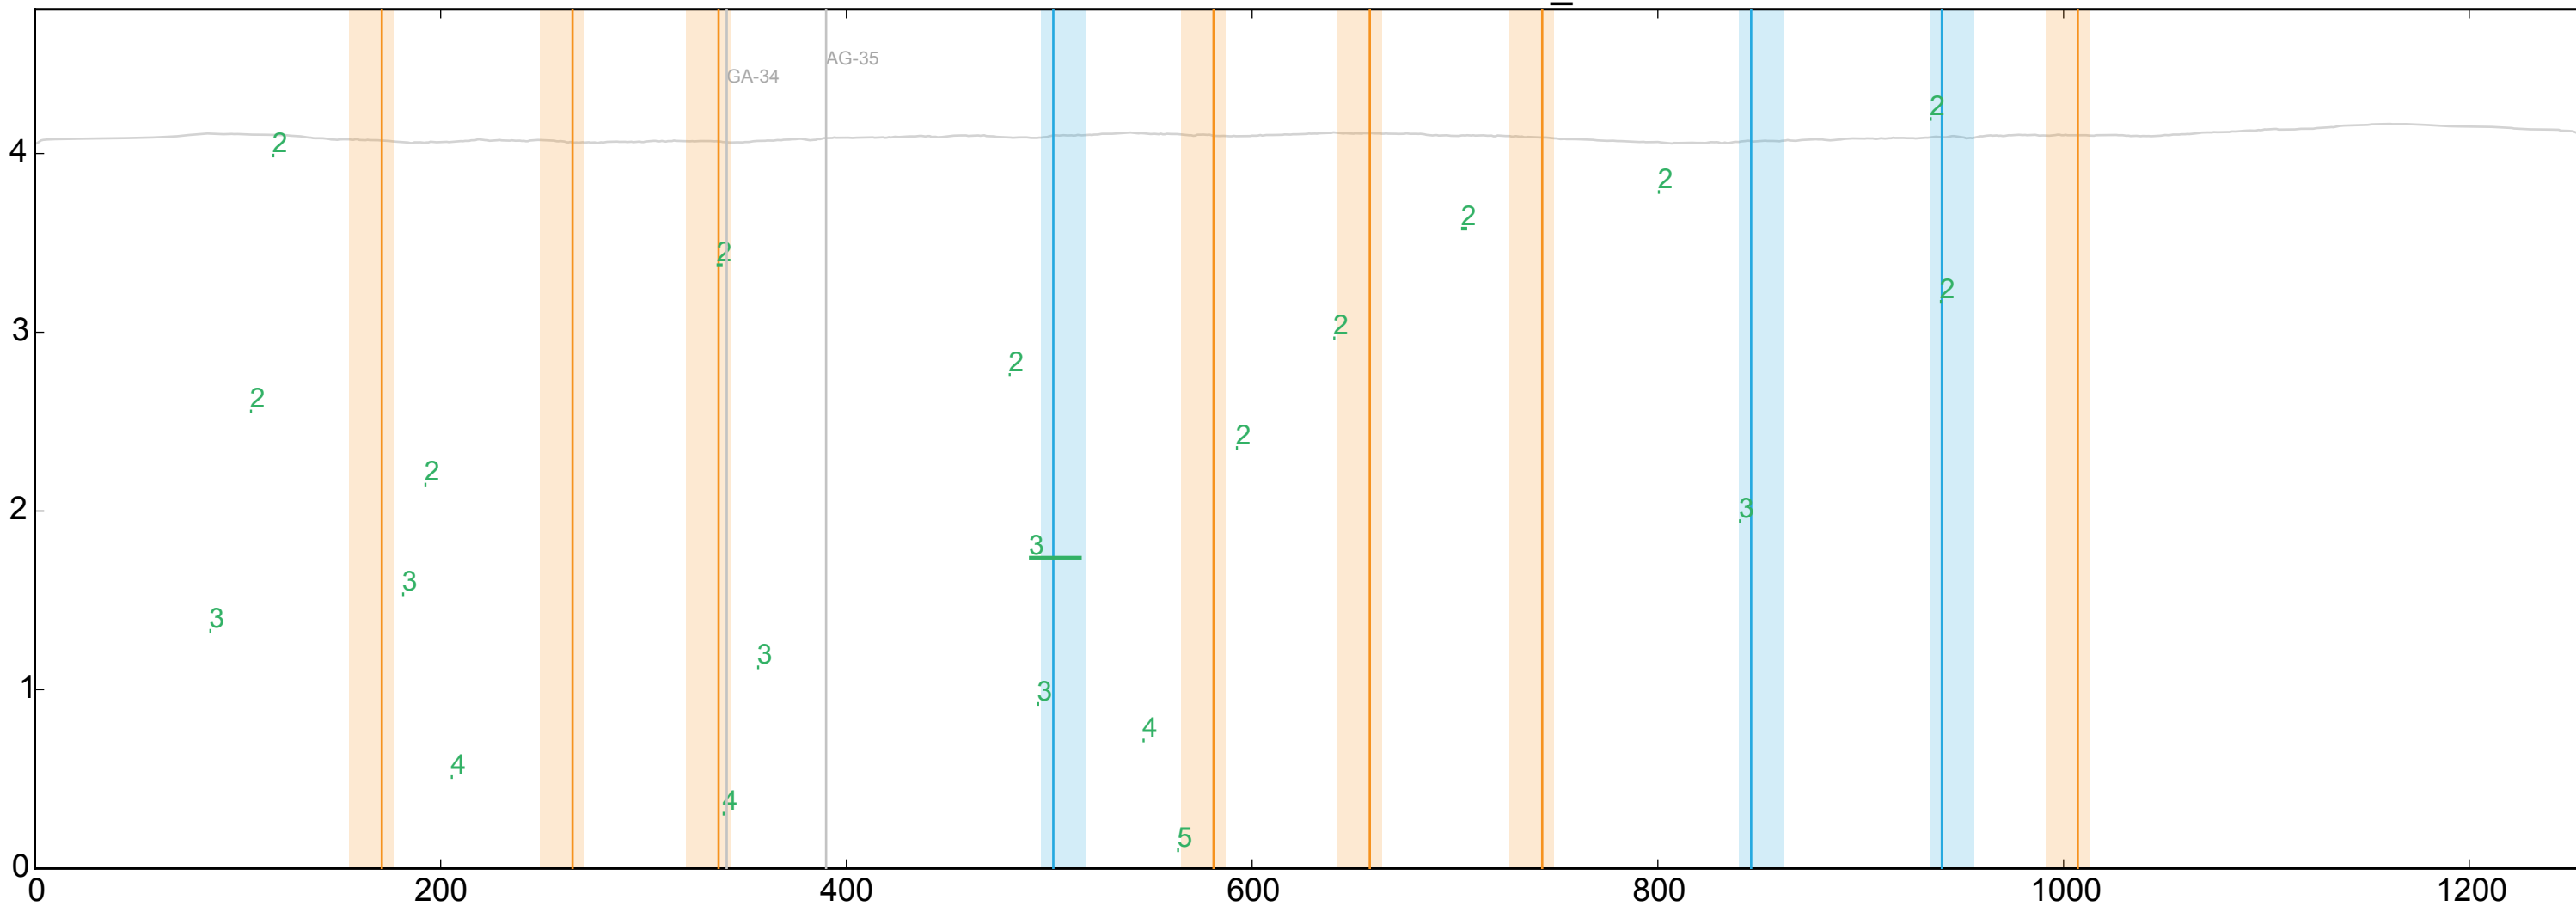

Mutant ENSDARG0000003751\_7

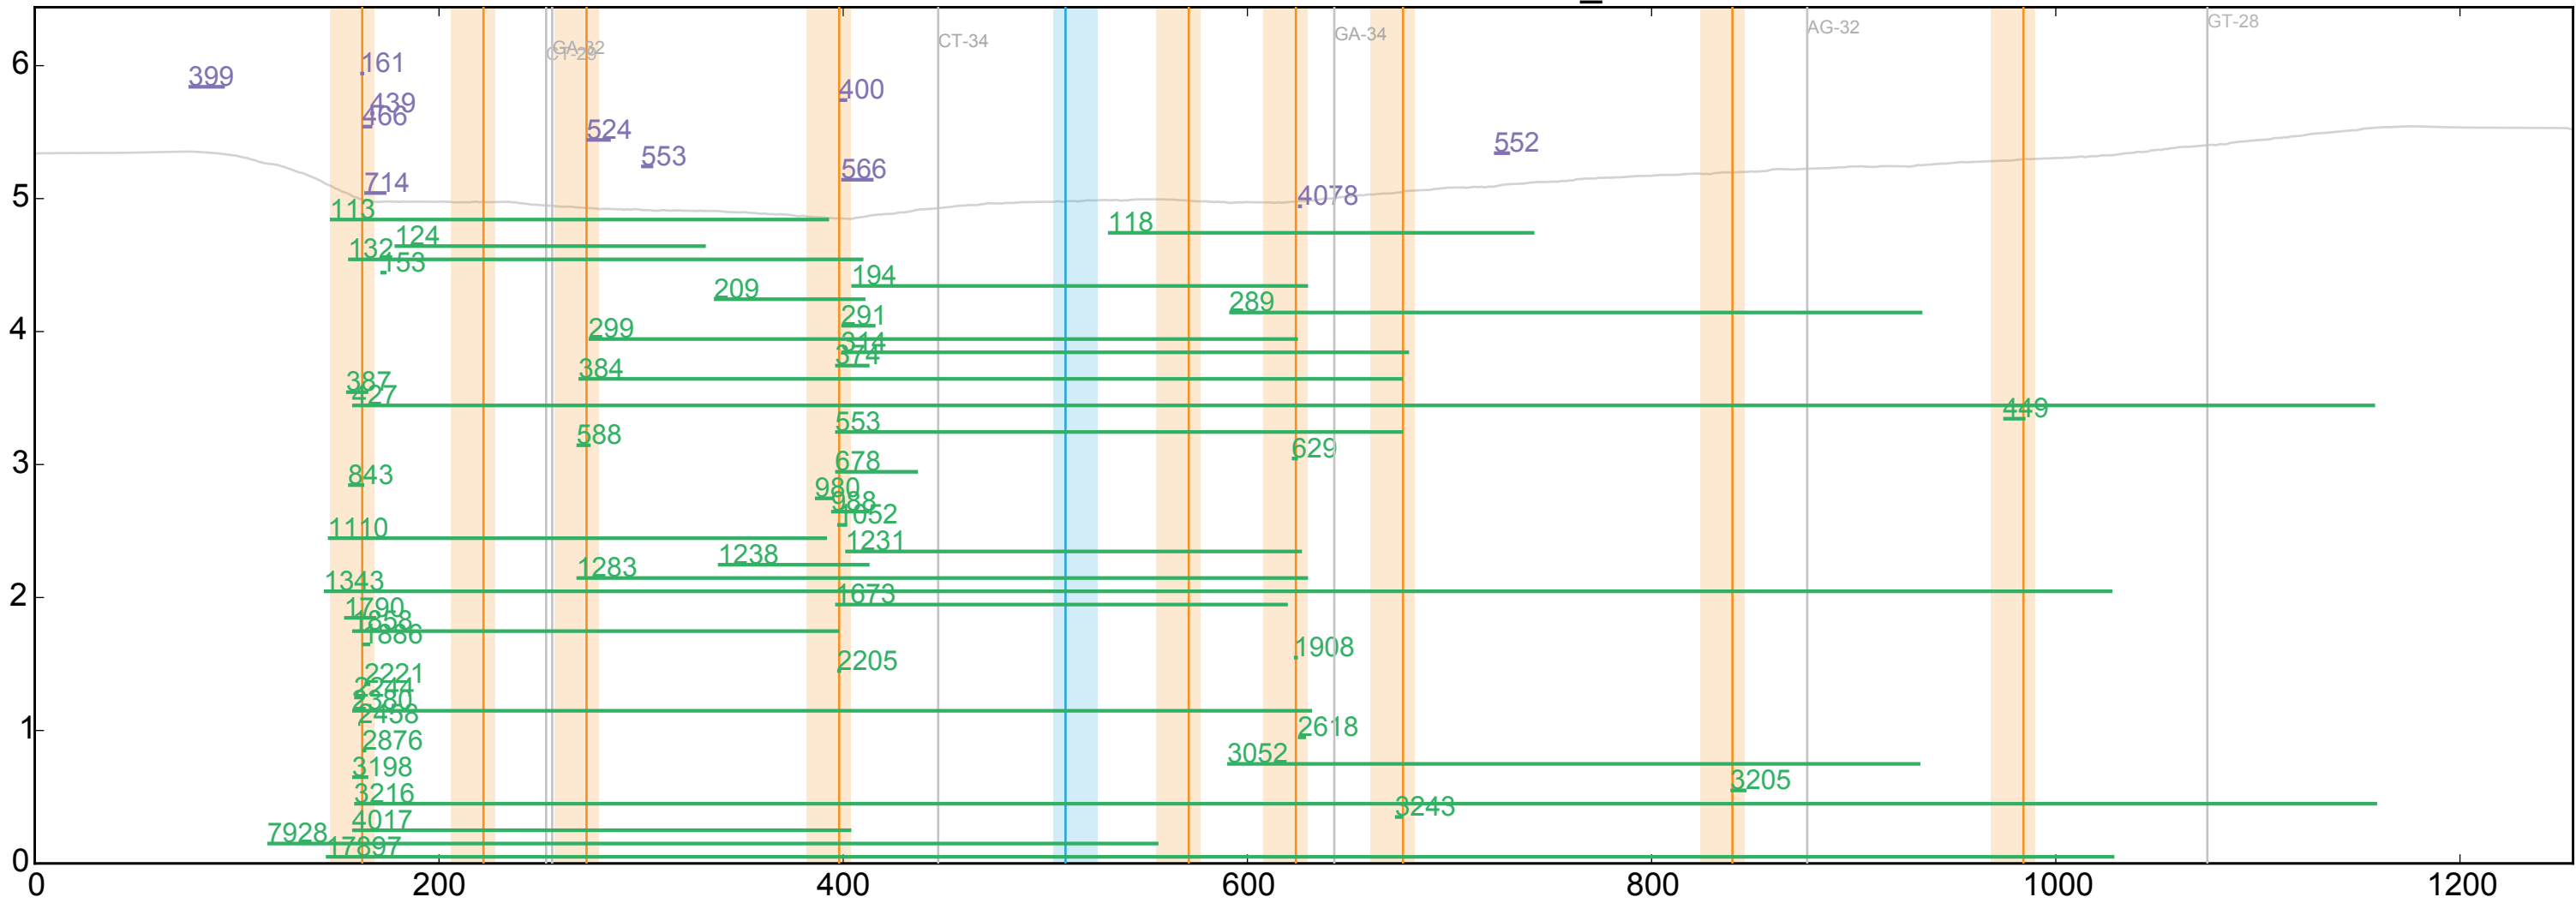

WT ENSDARG0000003751\_7

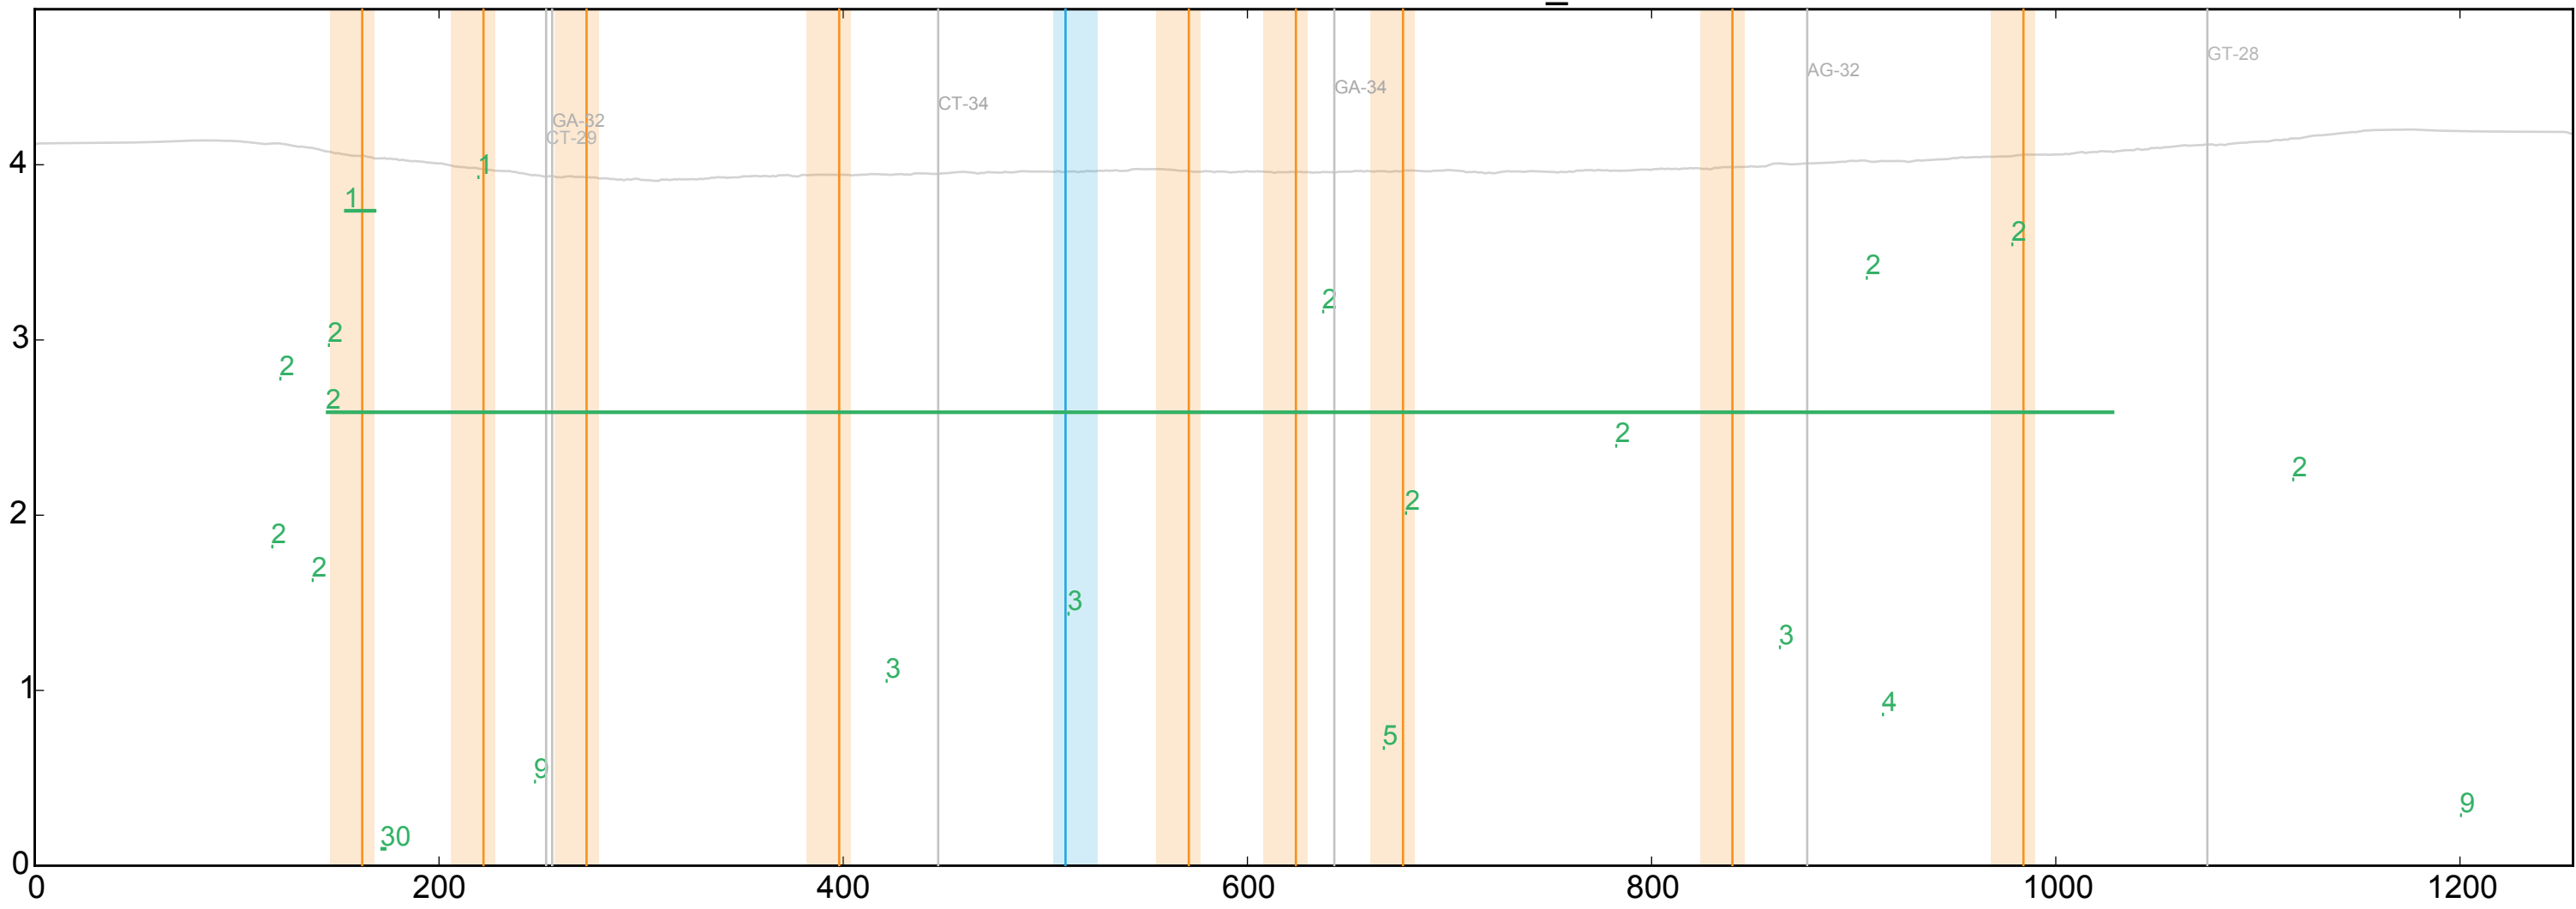

Mutant ENSDARG0000061976\_0

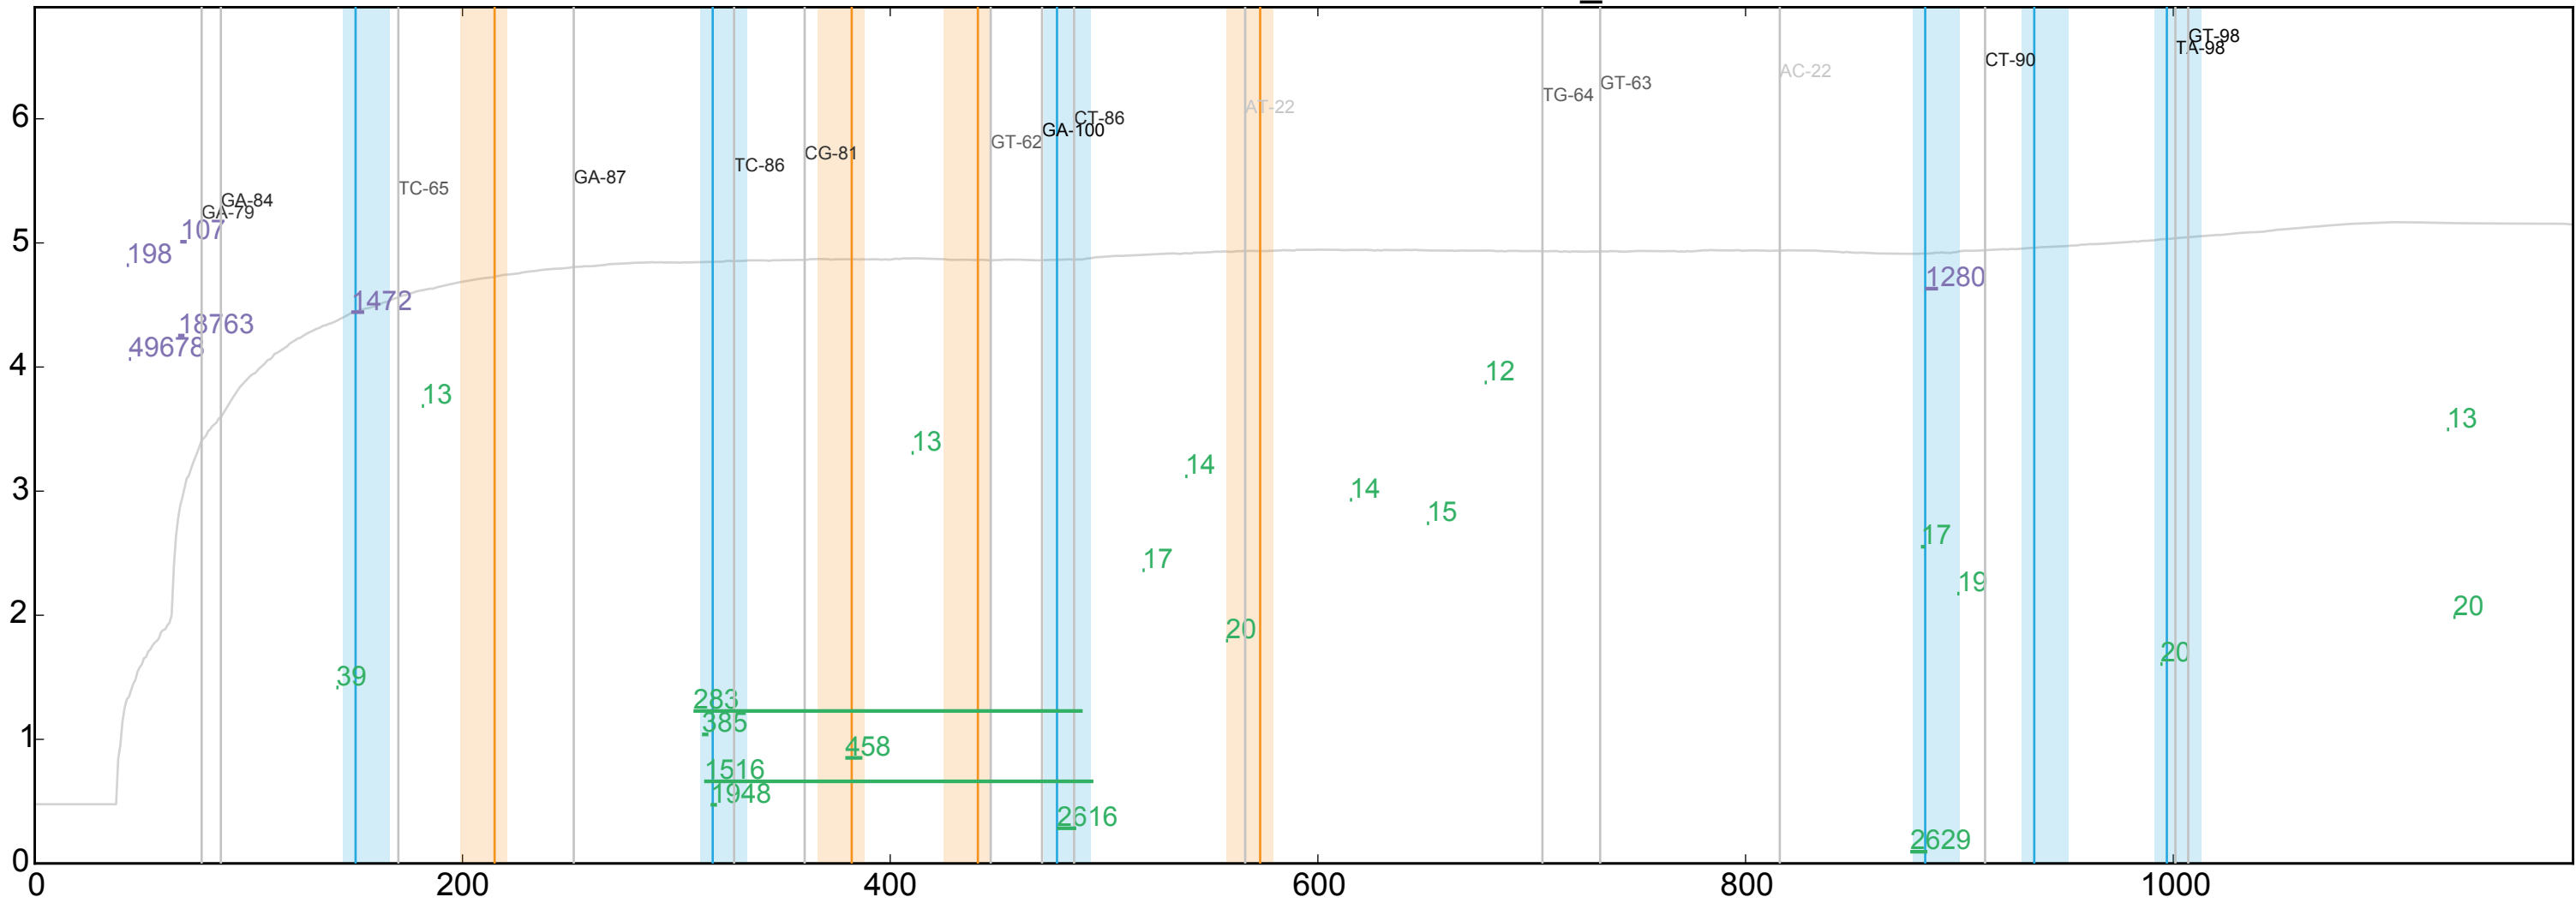

WT ENSDARG0000061976\_0

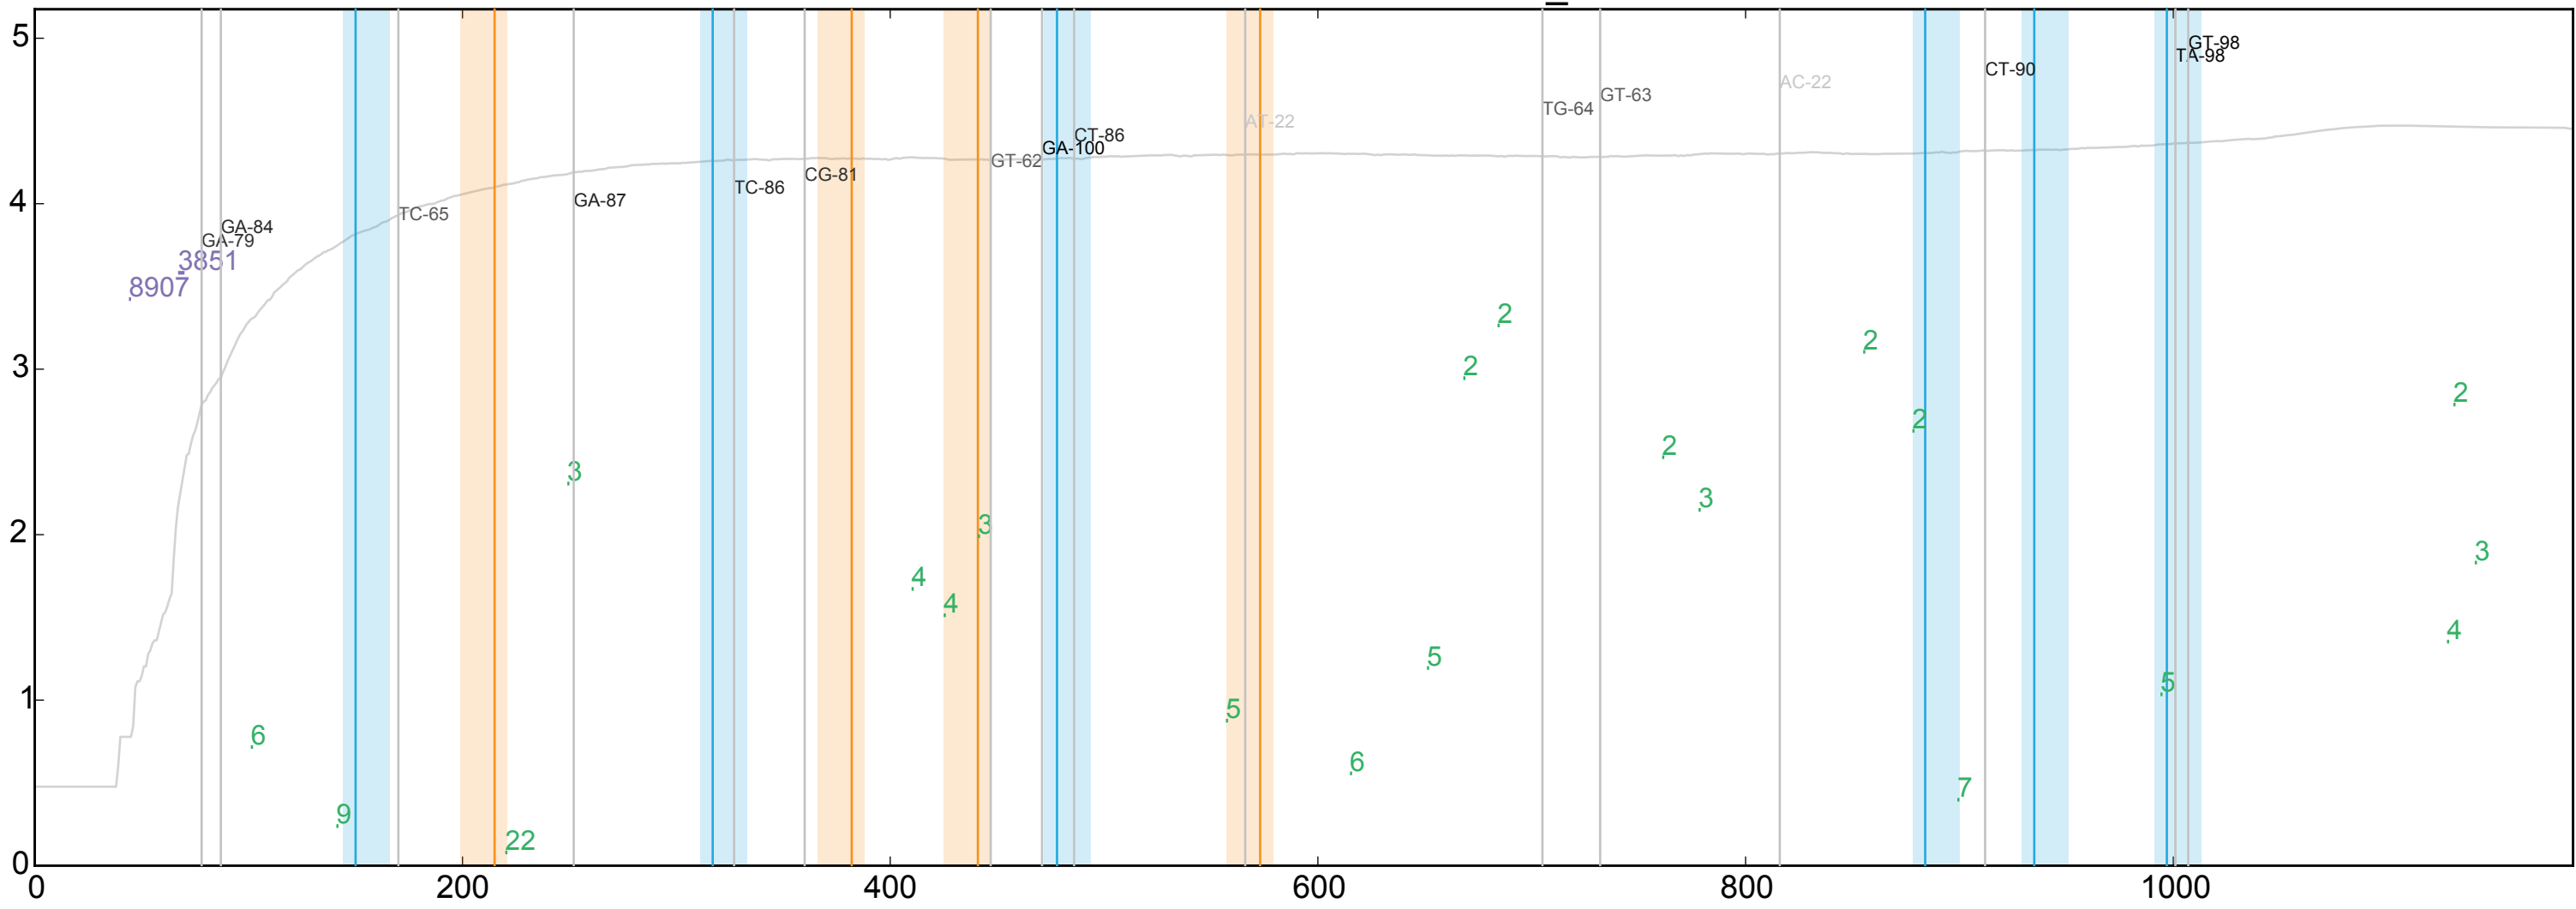

Mutant ENSDARG00000056713\_1

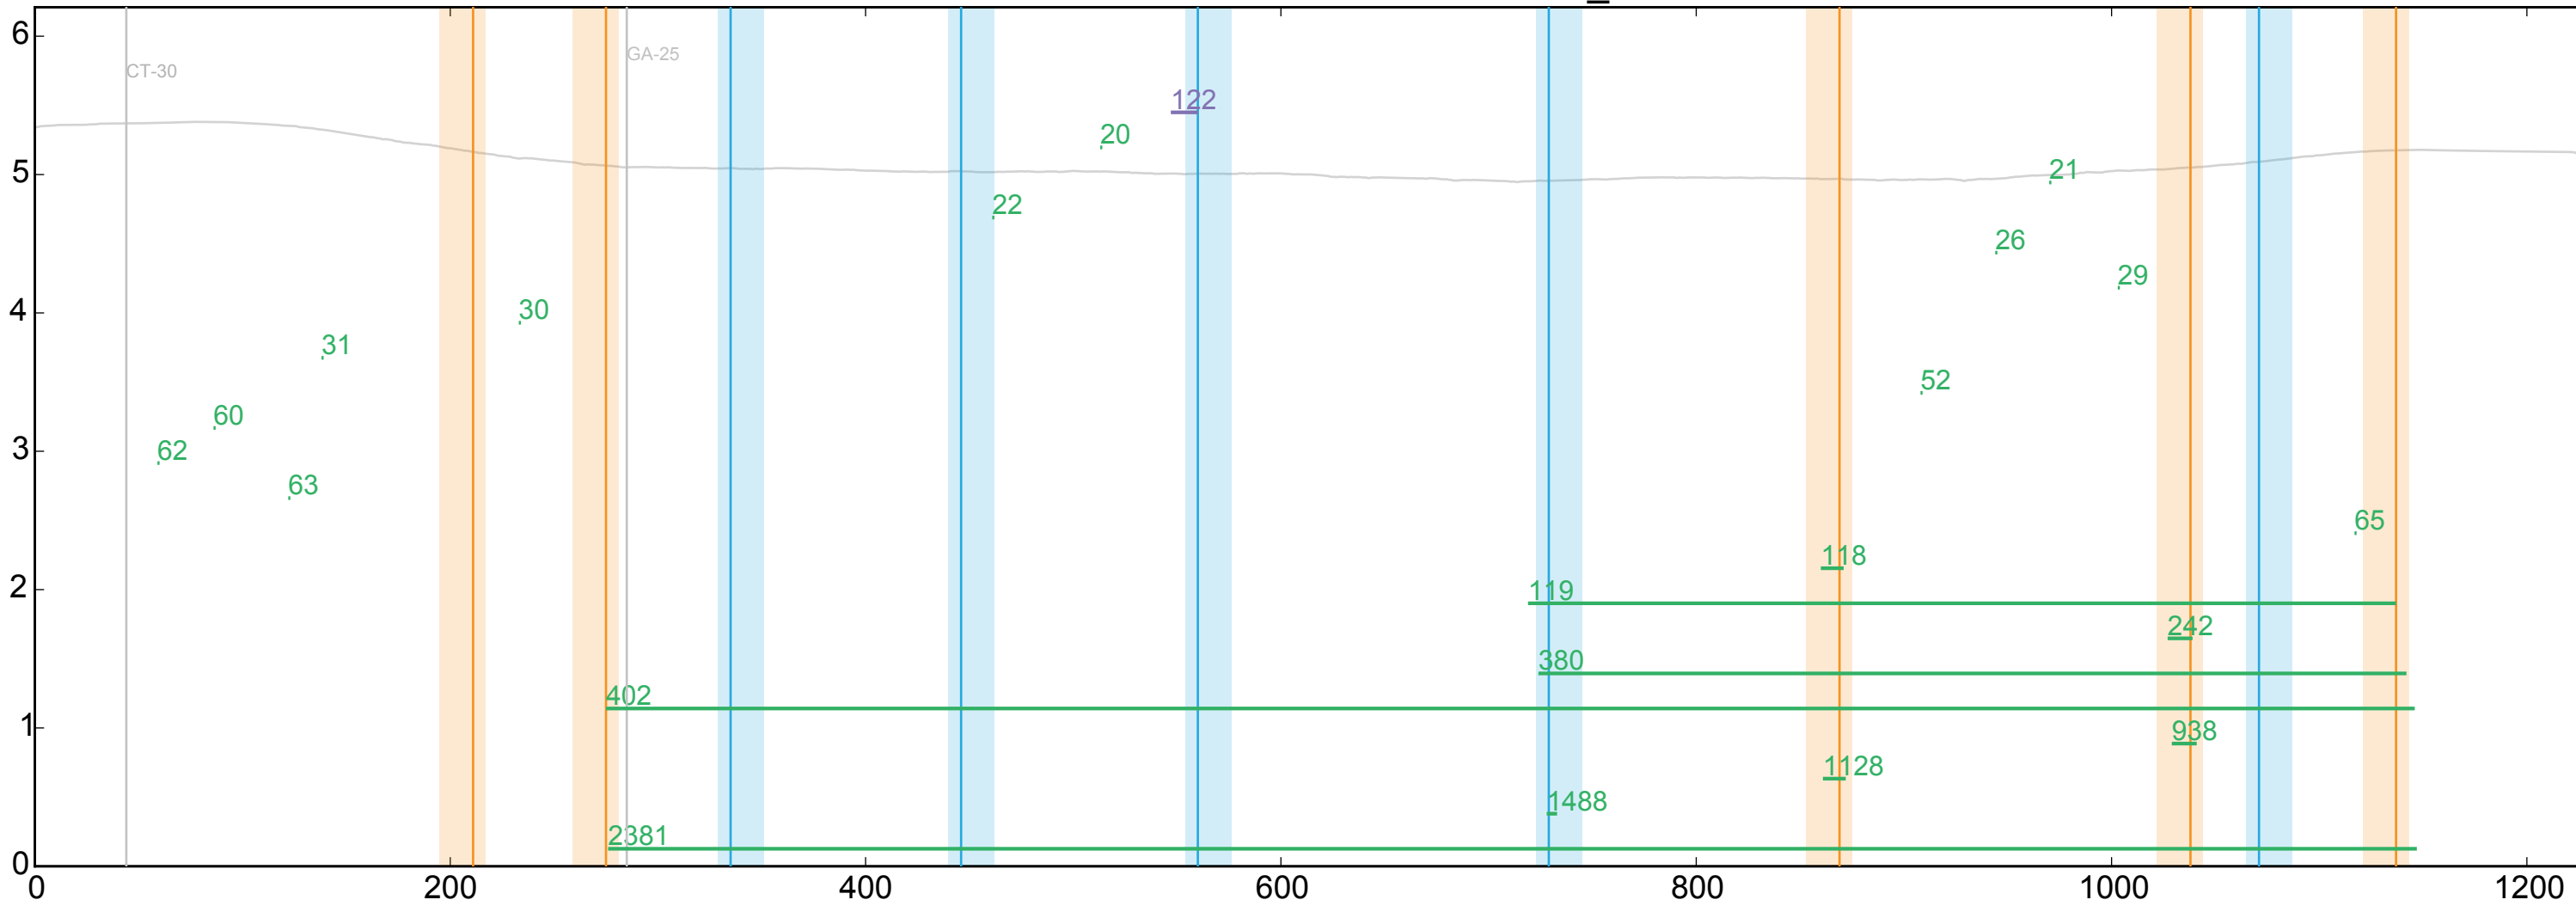

WT ENSDARG00000056713\_1

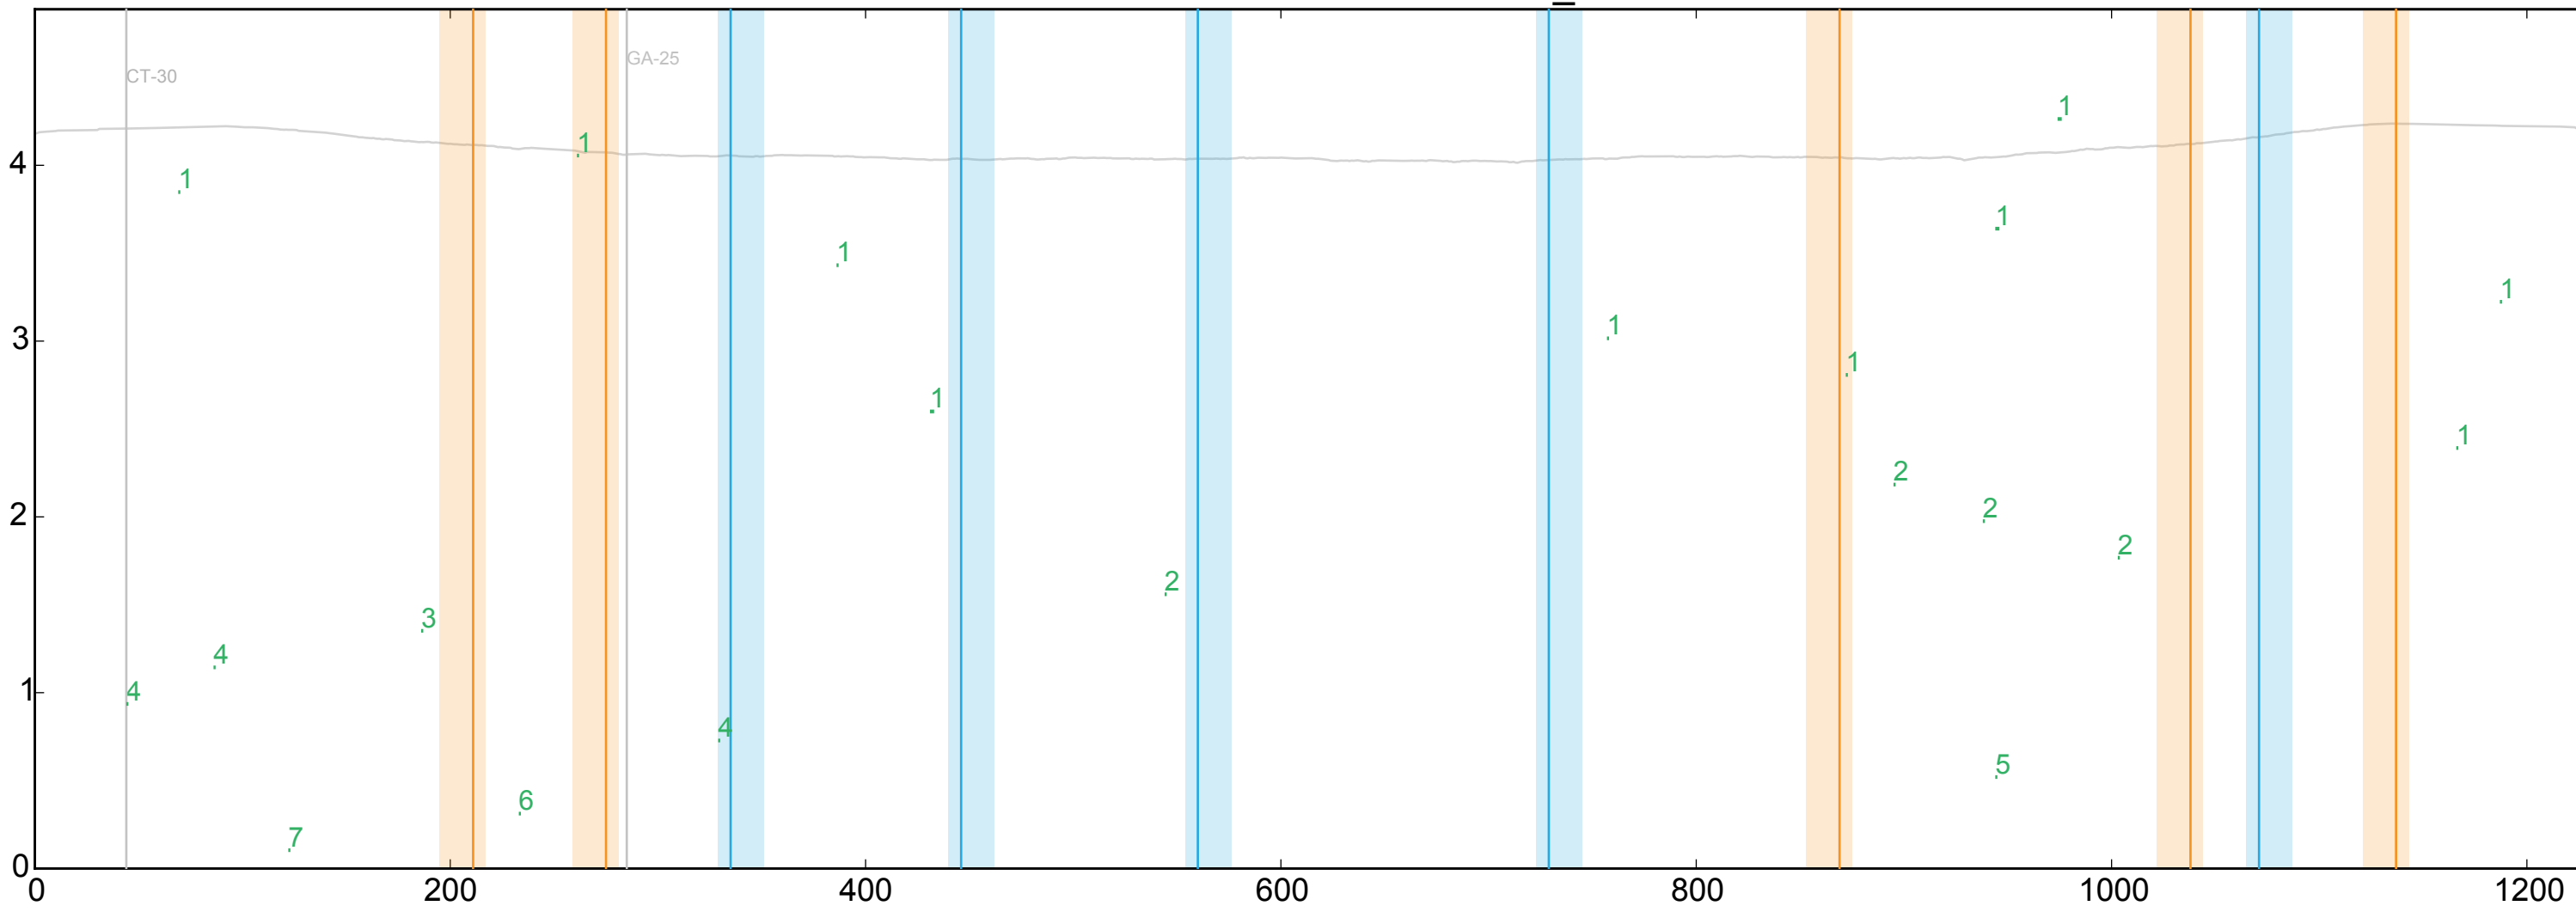

Mutant ENSDARG00000070145\_20

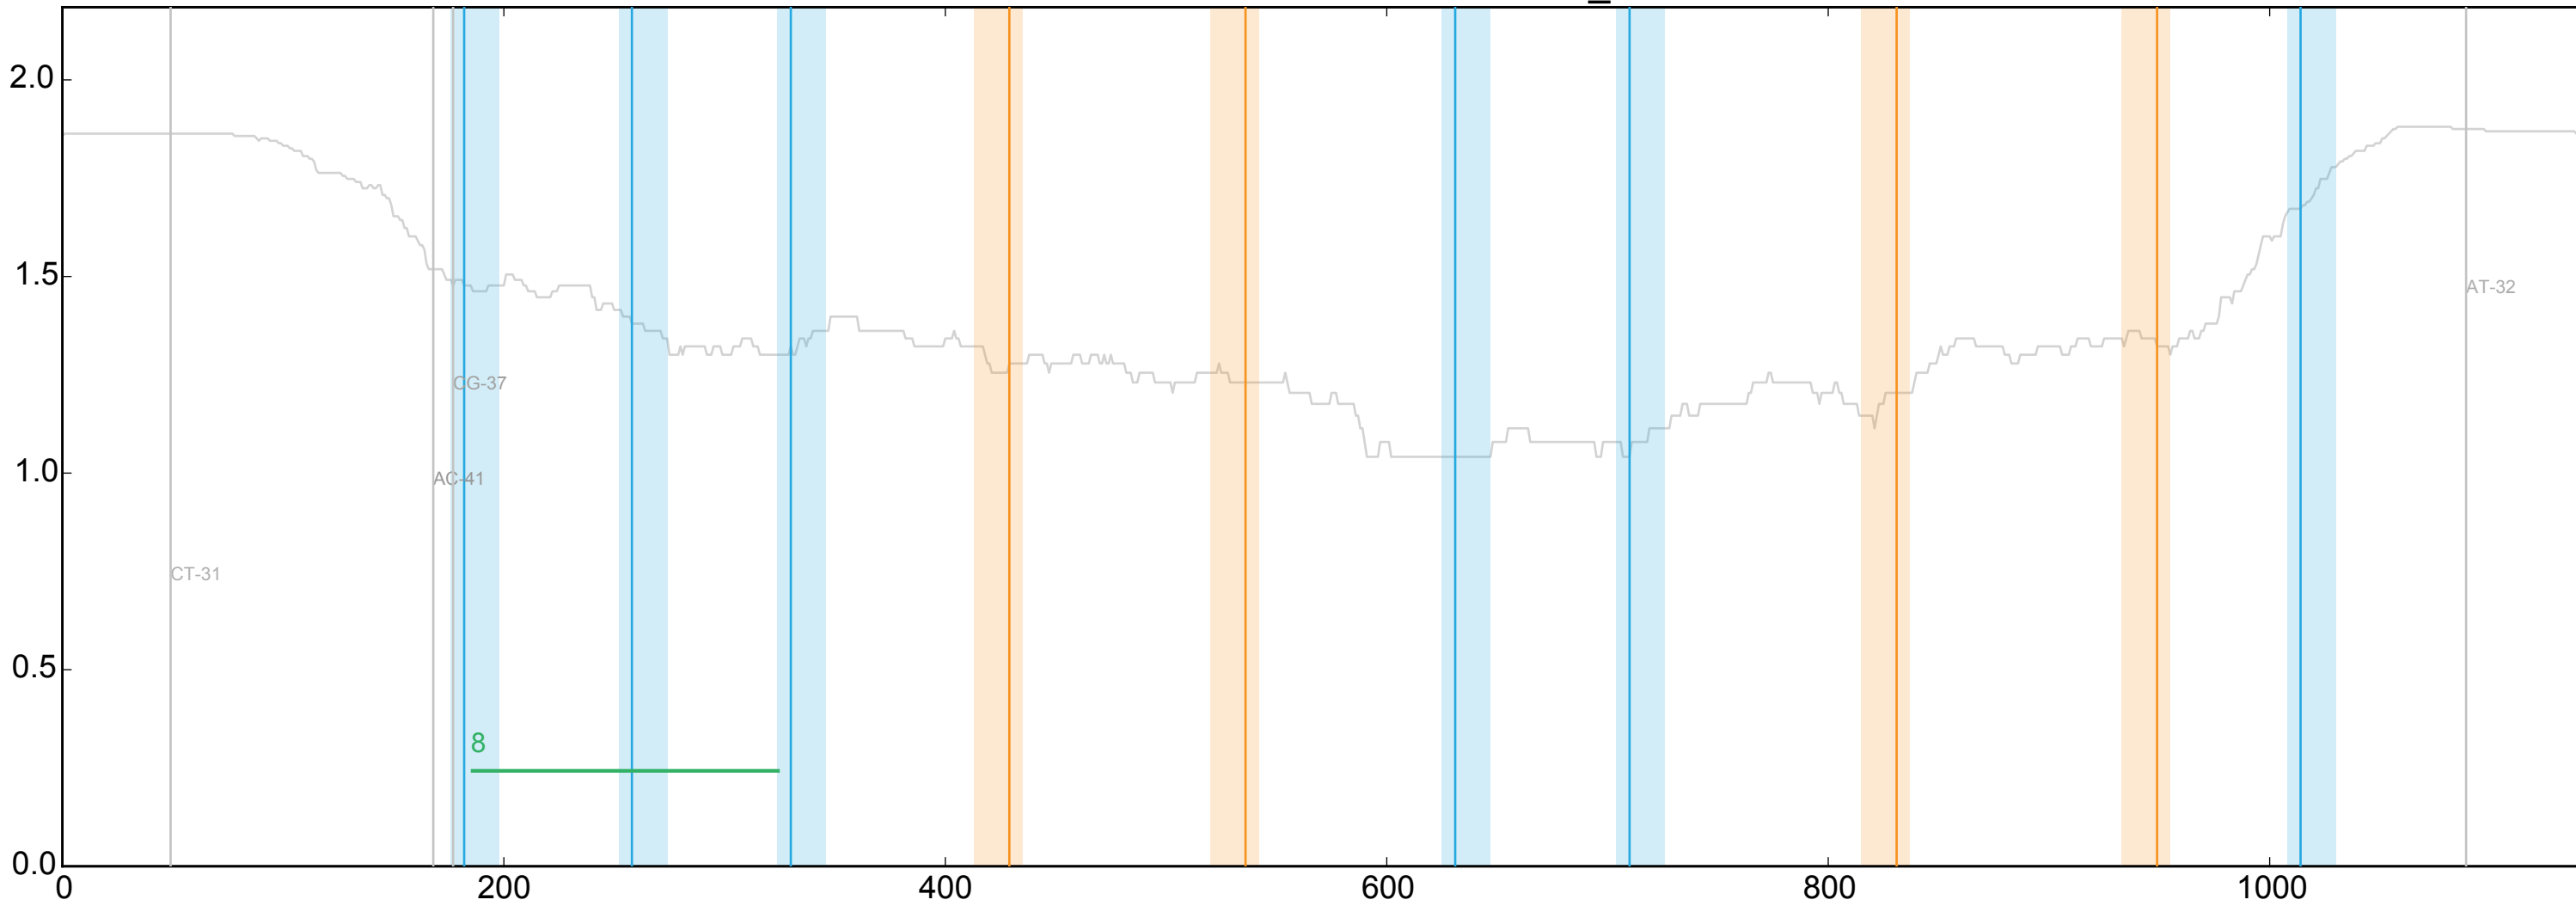

WT ENSDARG00000070145\_20

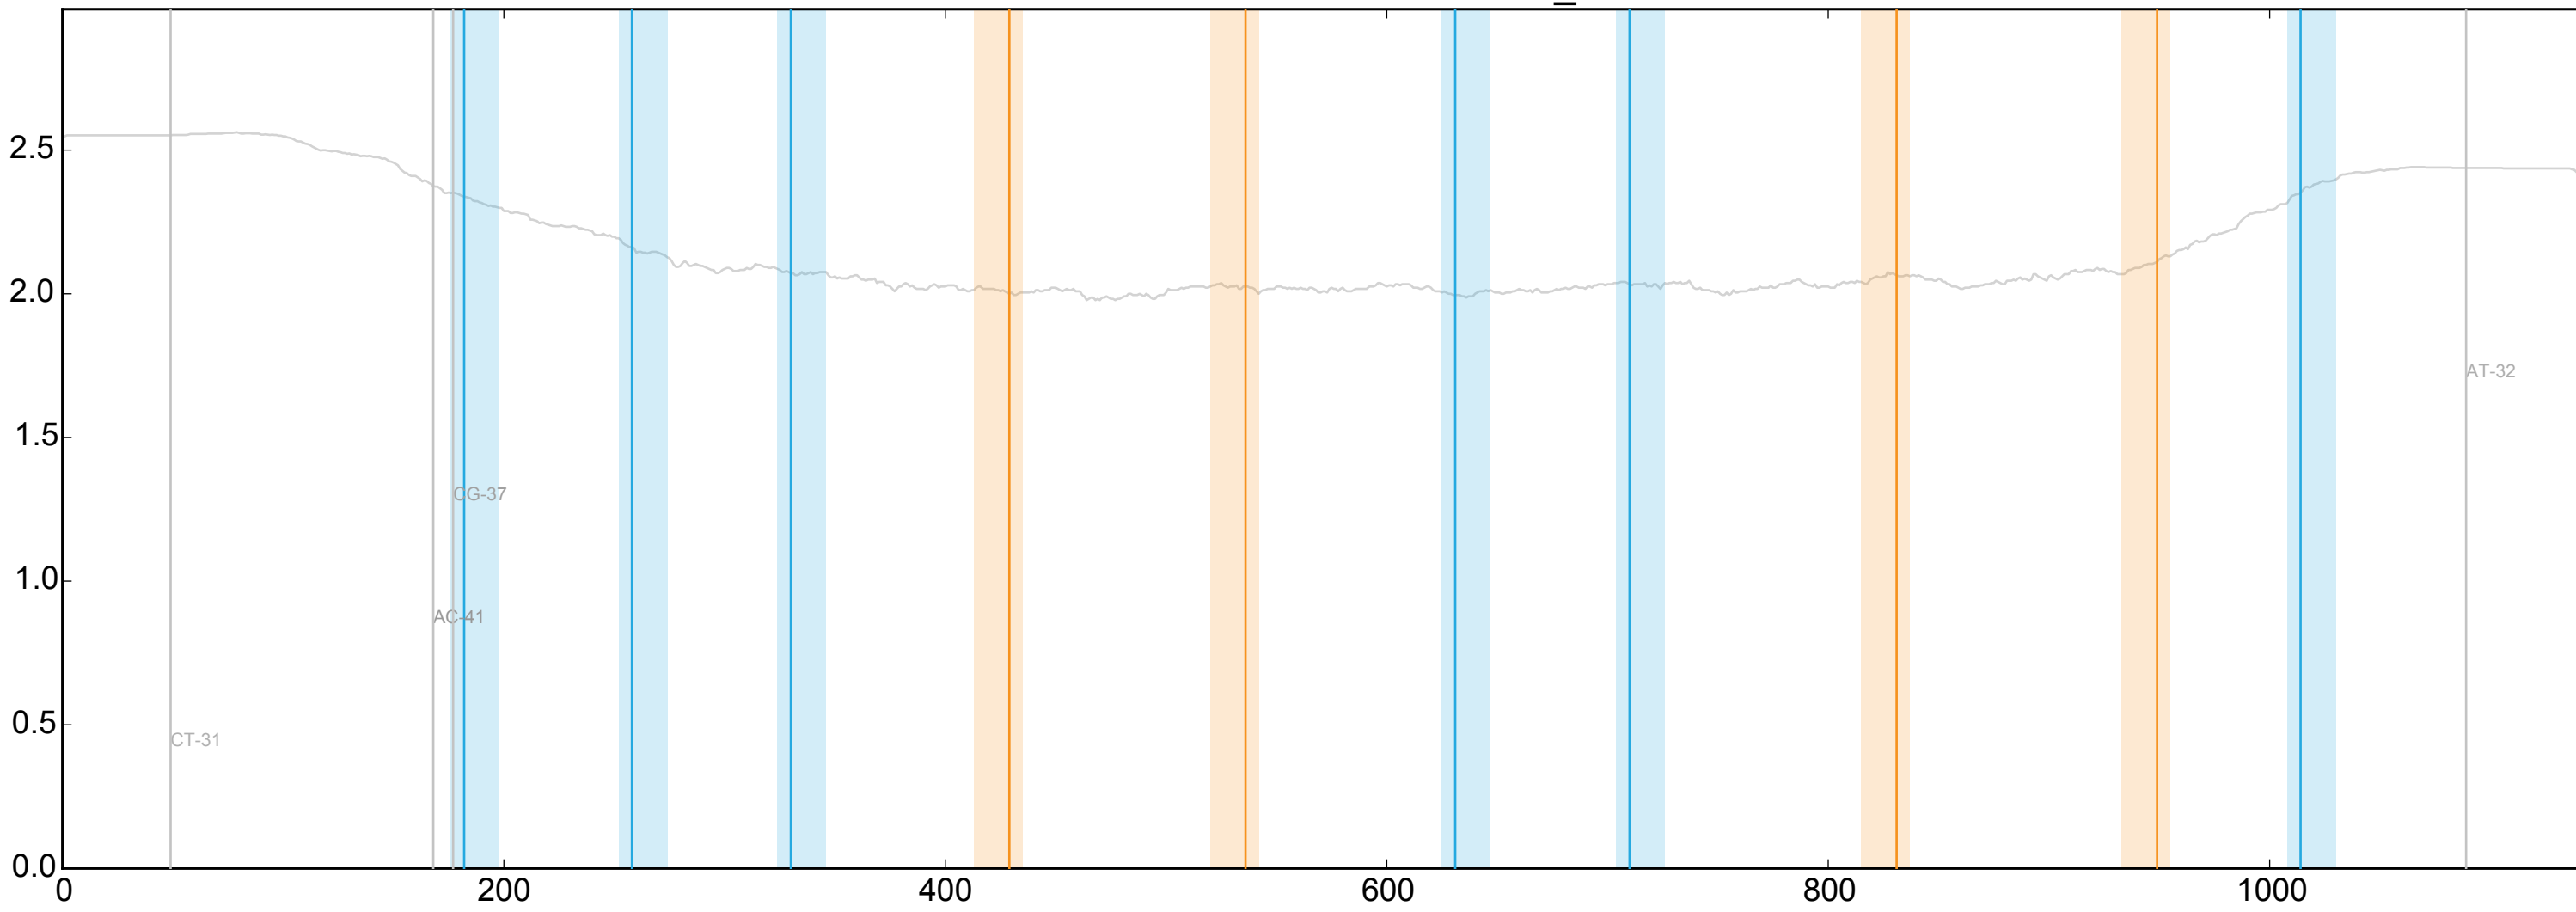

Mutant ENSDARG00000073817\_2

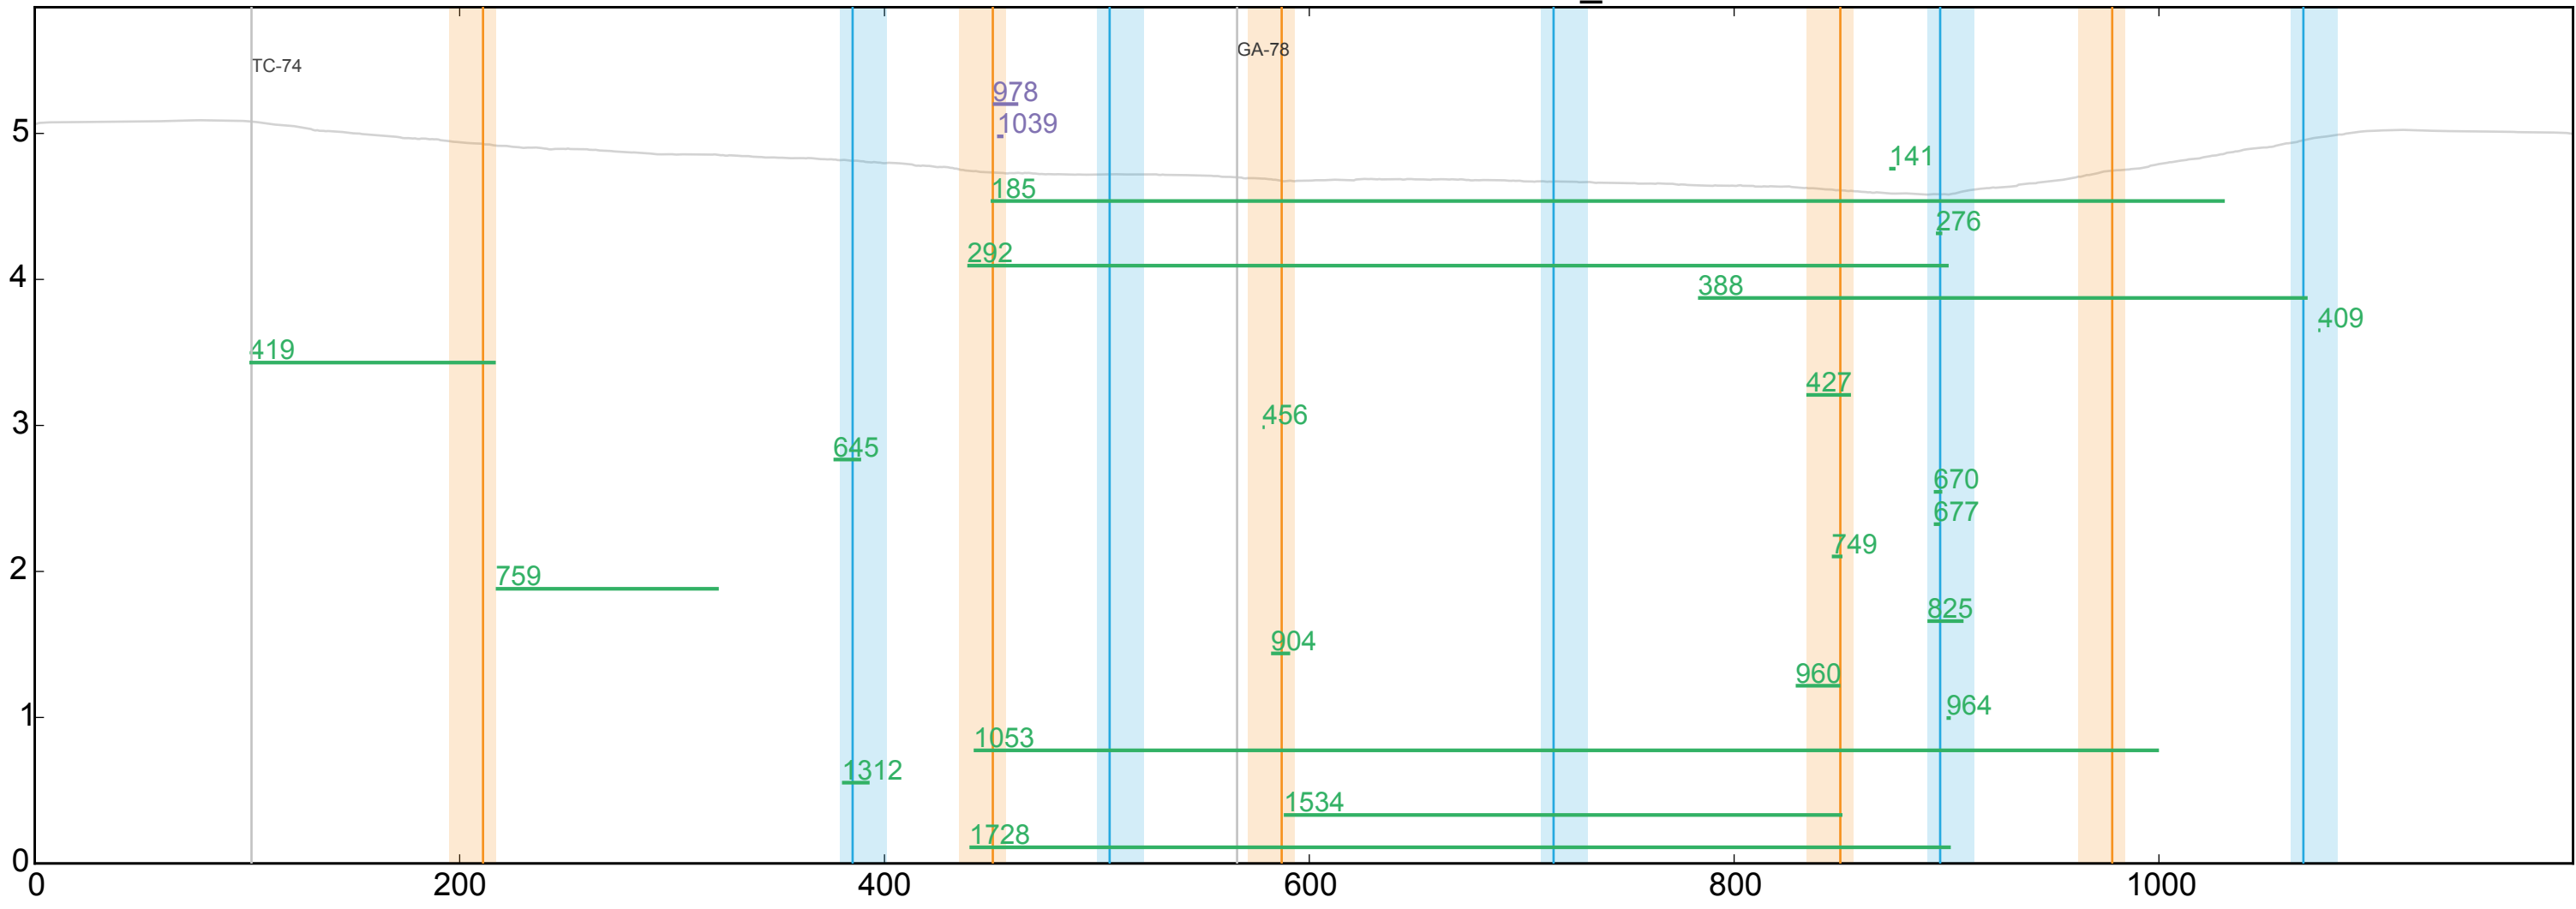

WT ENSDARG00000073817\_2

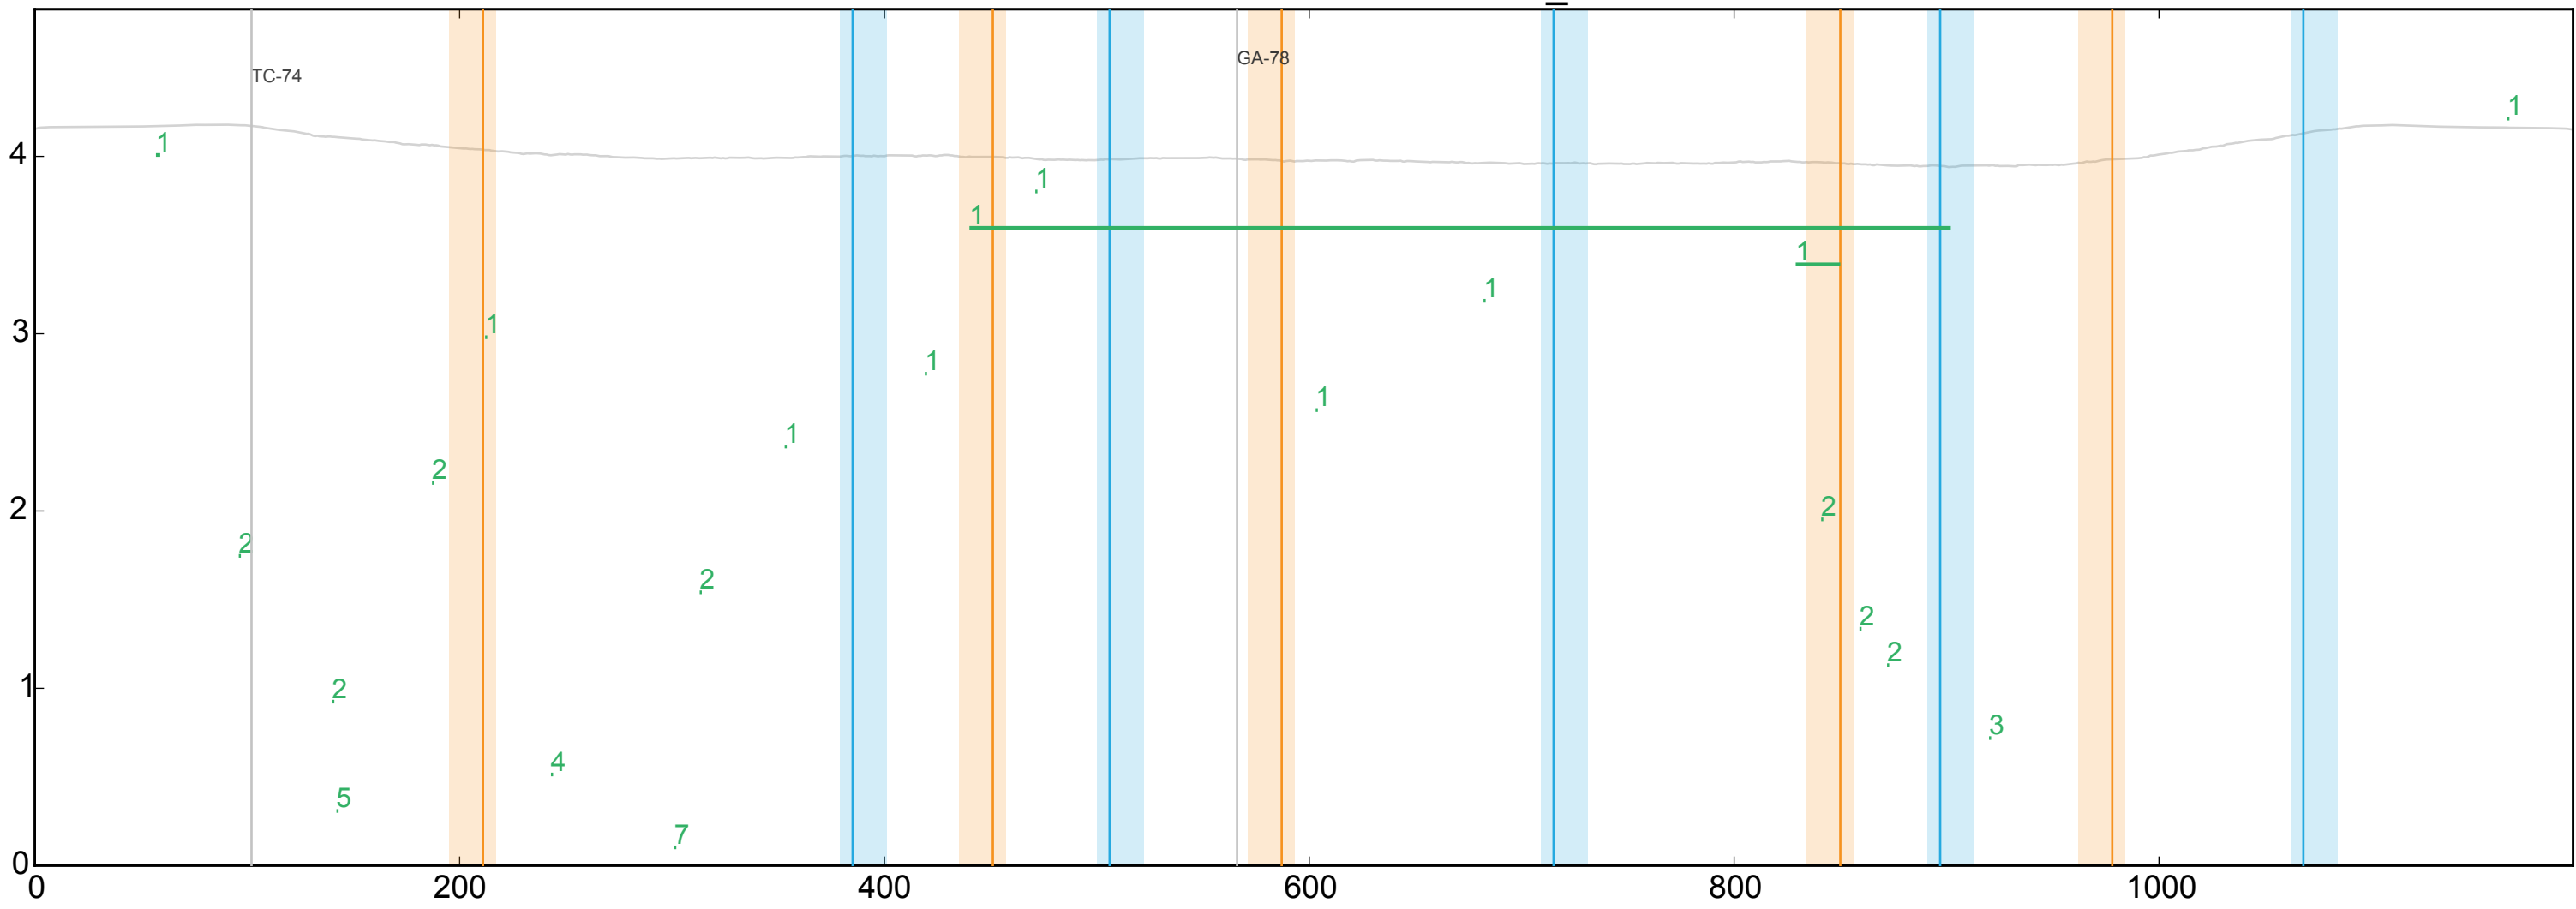

Mutant ENSDARG00000040948\_0

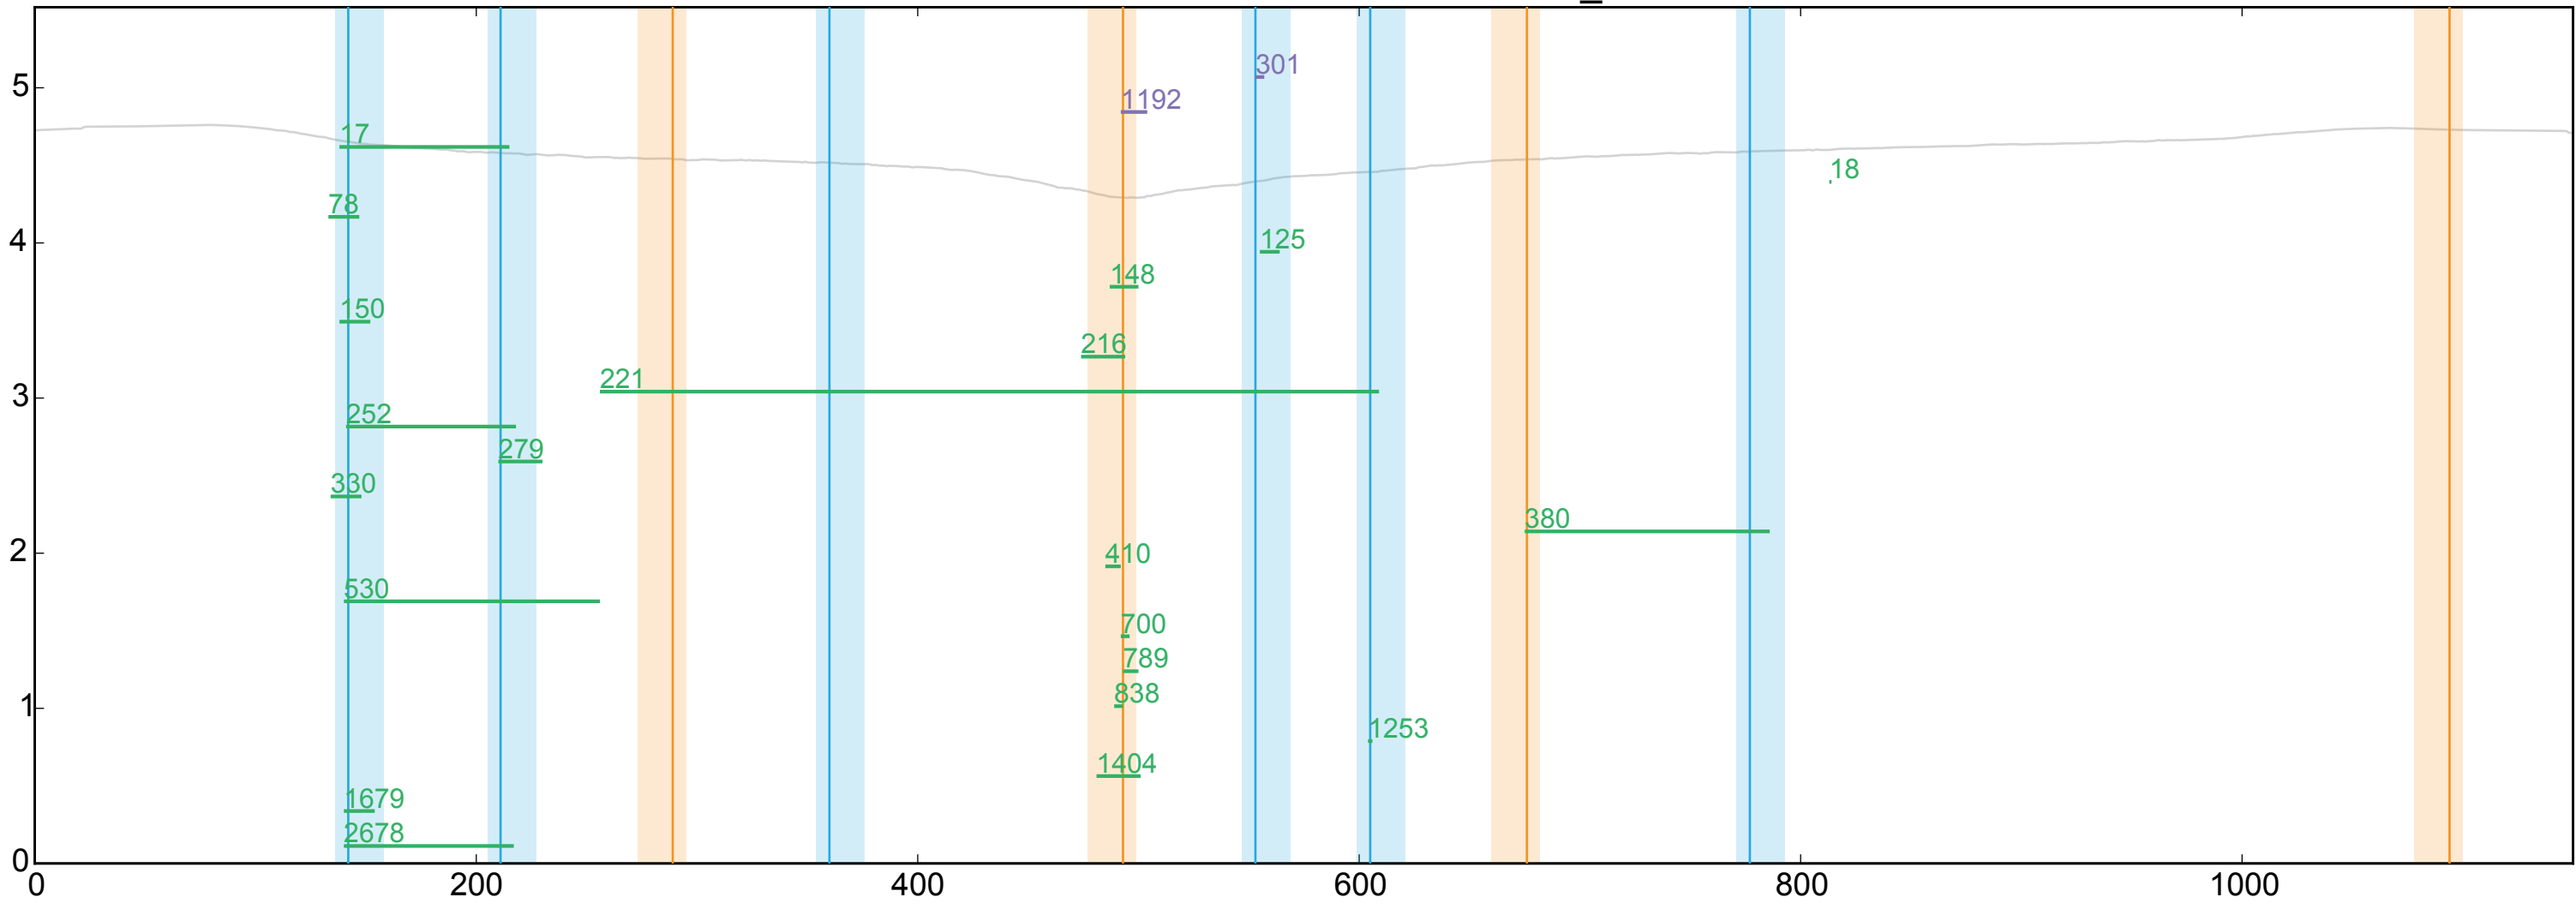

WT ENSDARG00000040948\_0

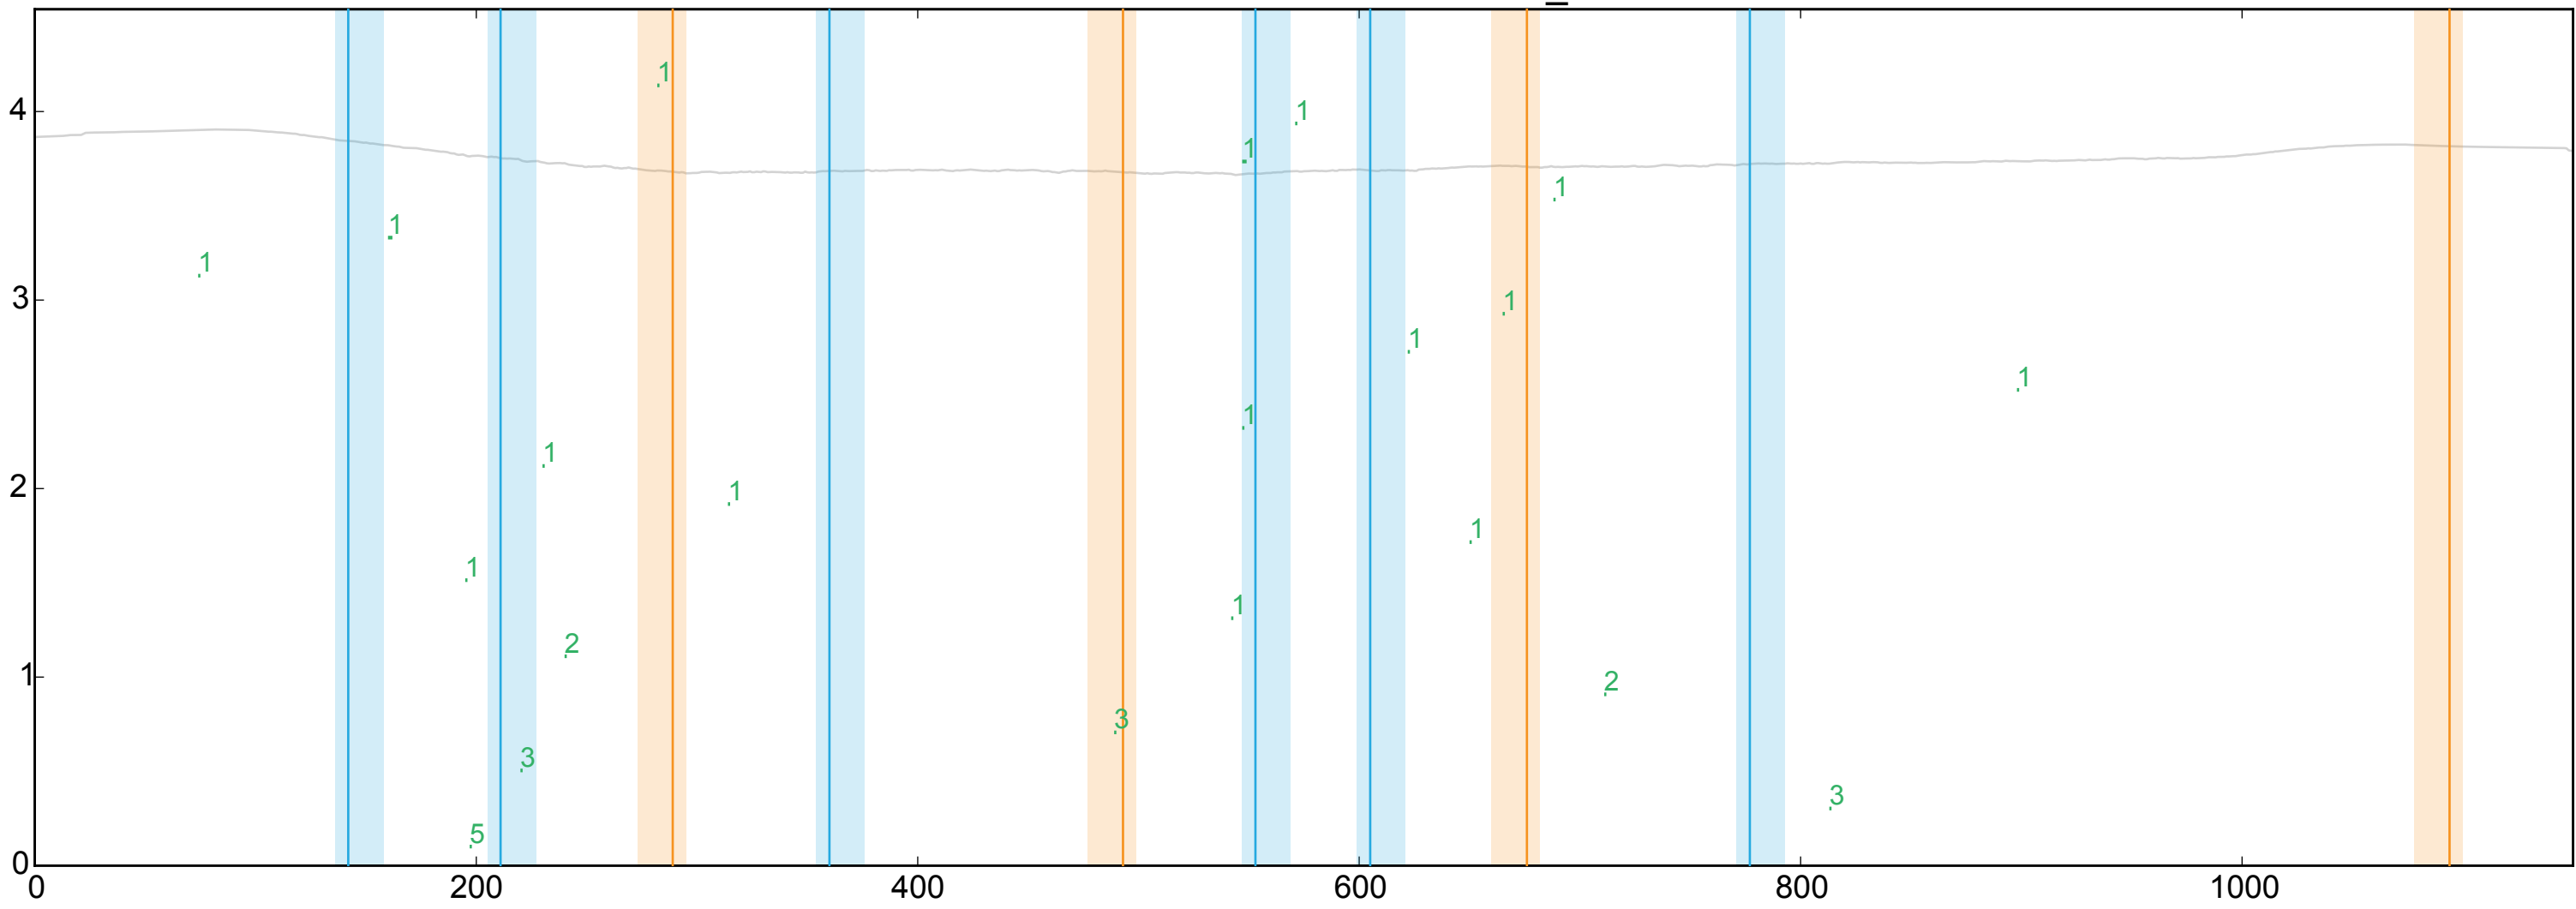

Mutant ENSDARG0000004377\_4

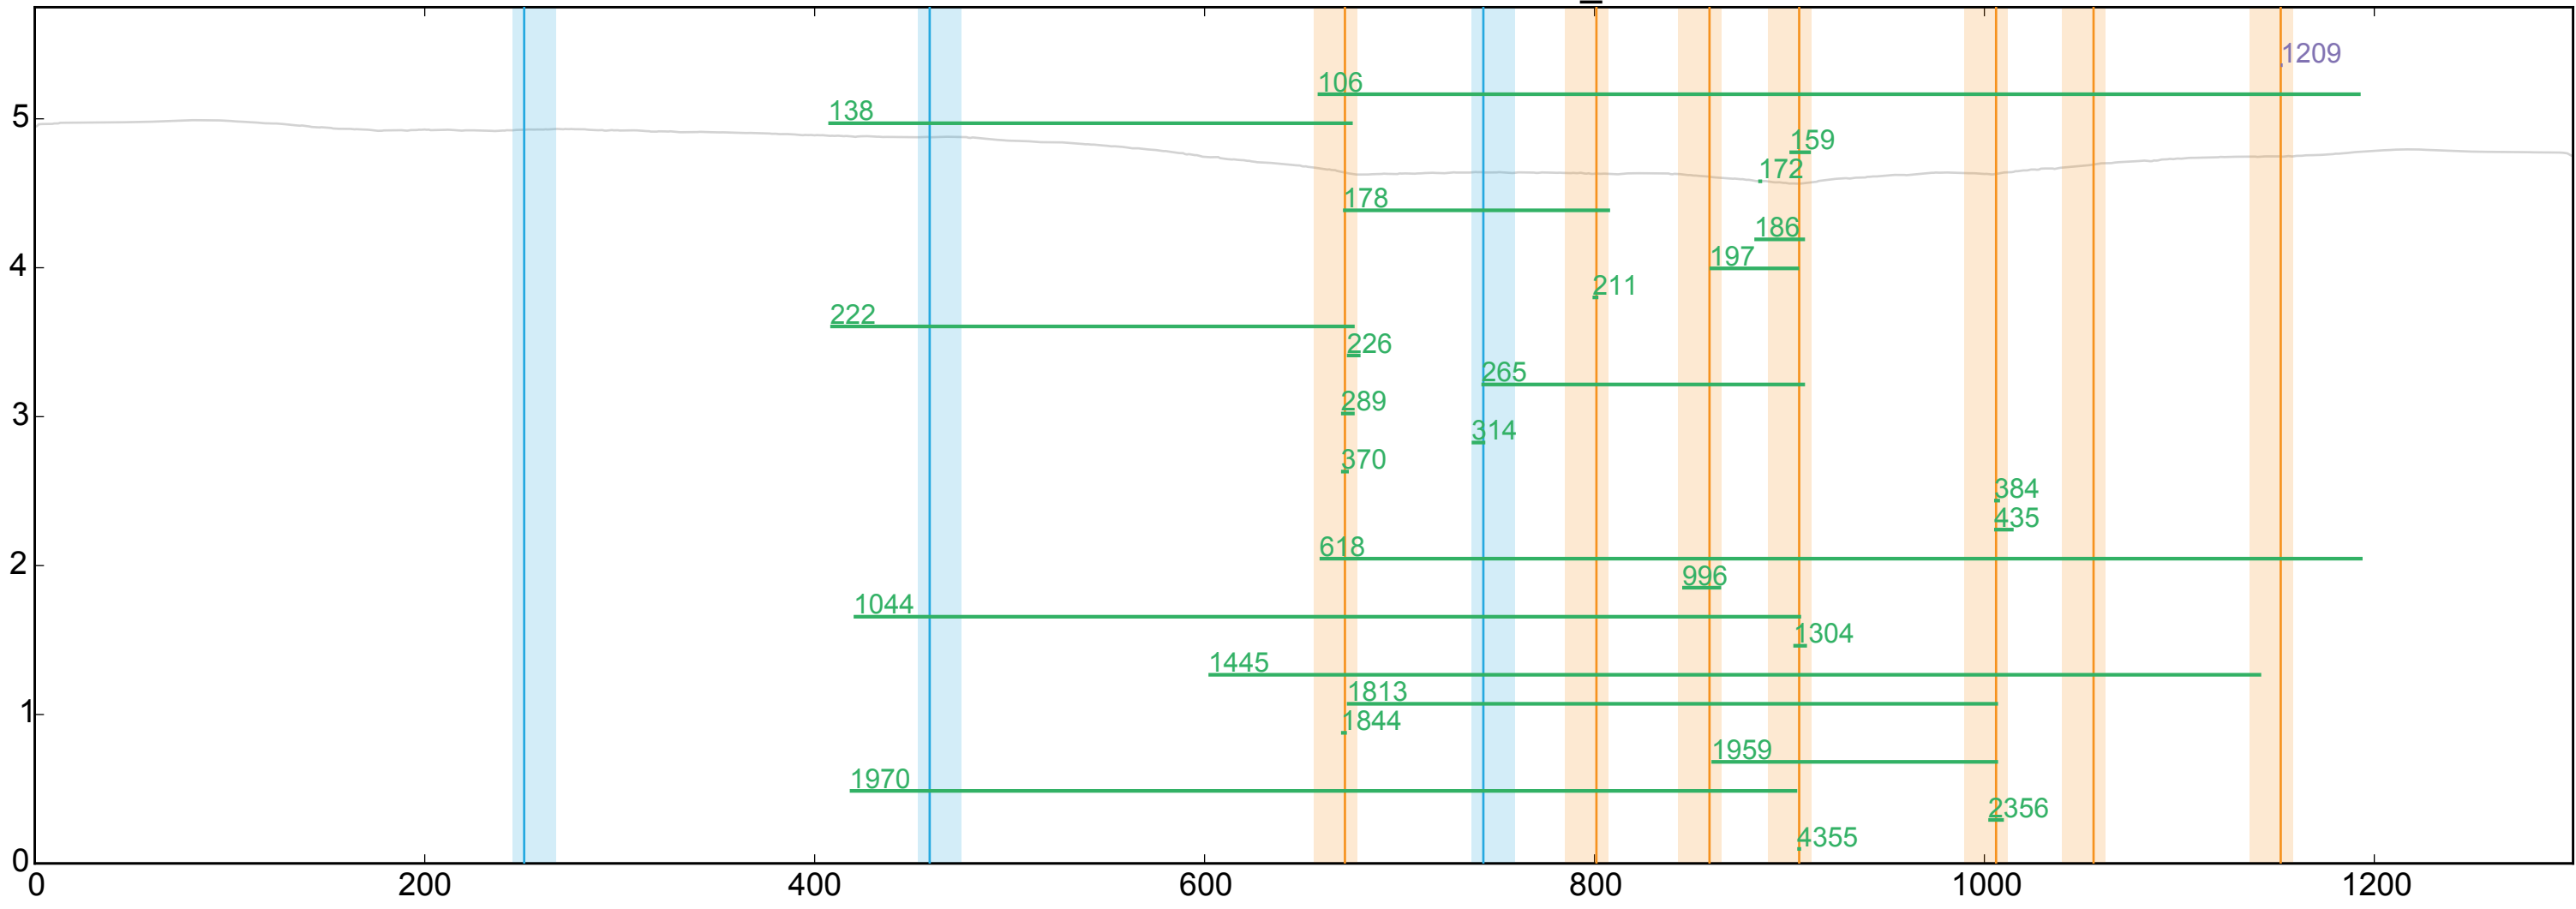

WT ENSDARG0000004377\_4

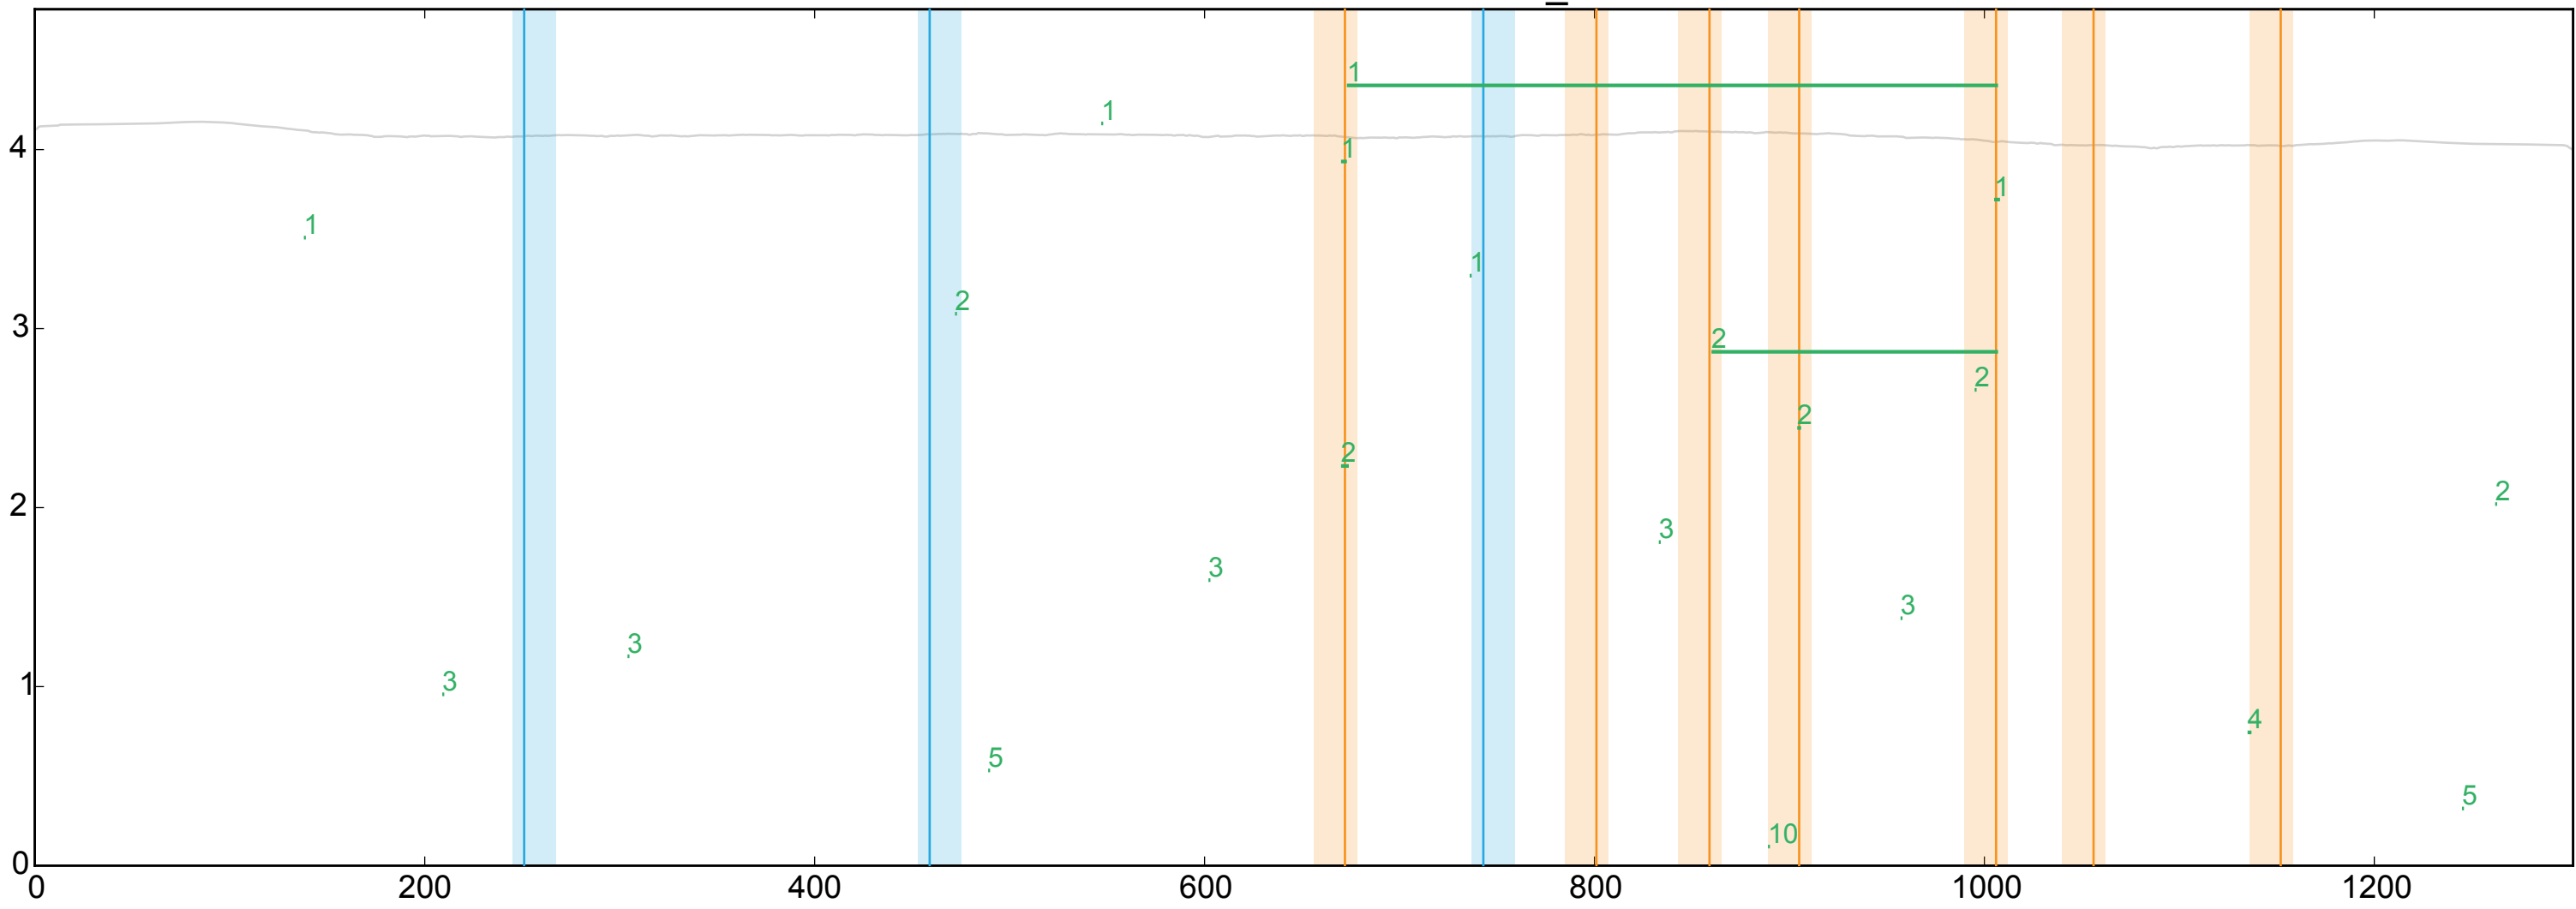



Mutant ENSDARG00000043130\_33

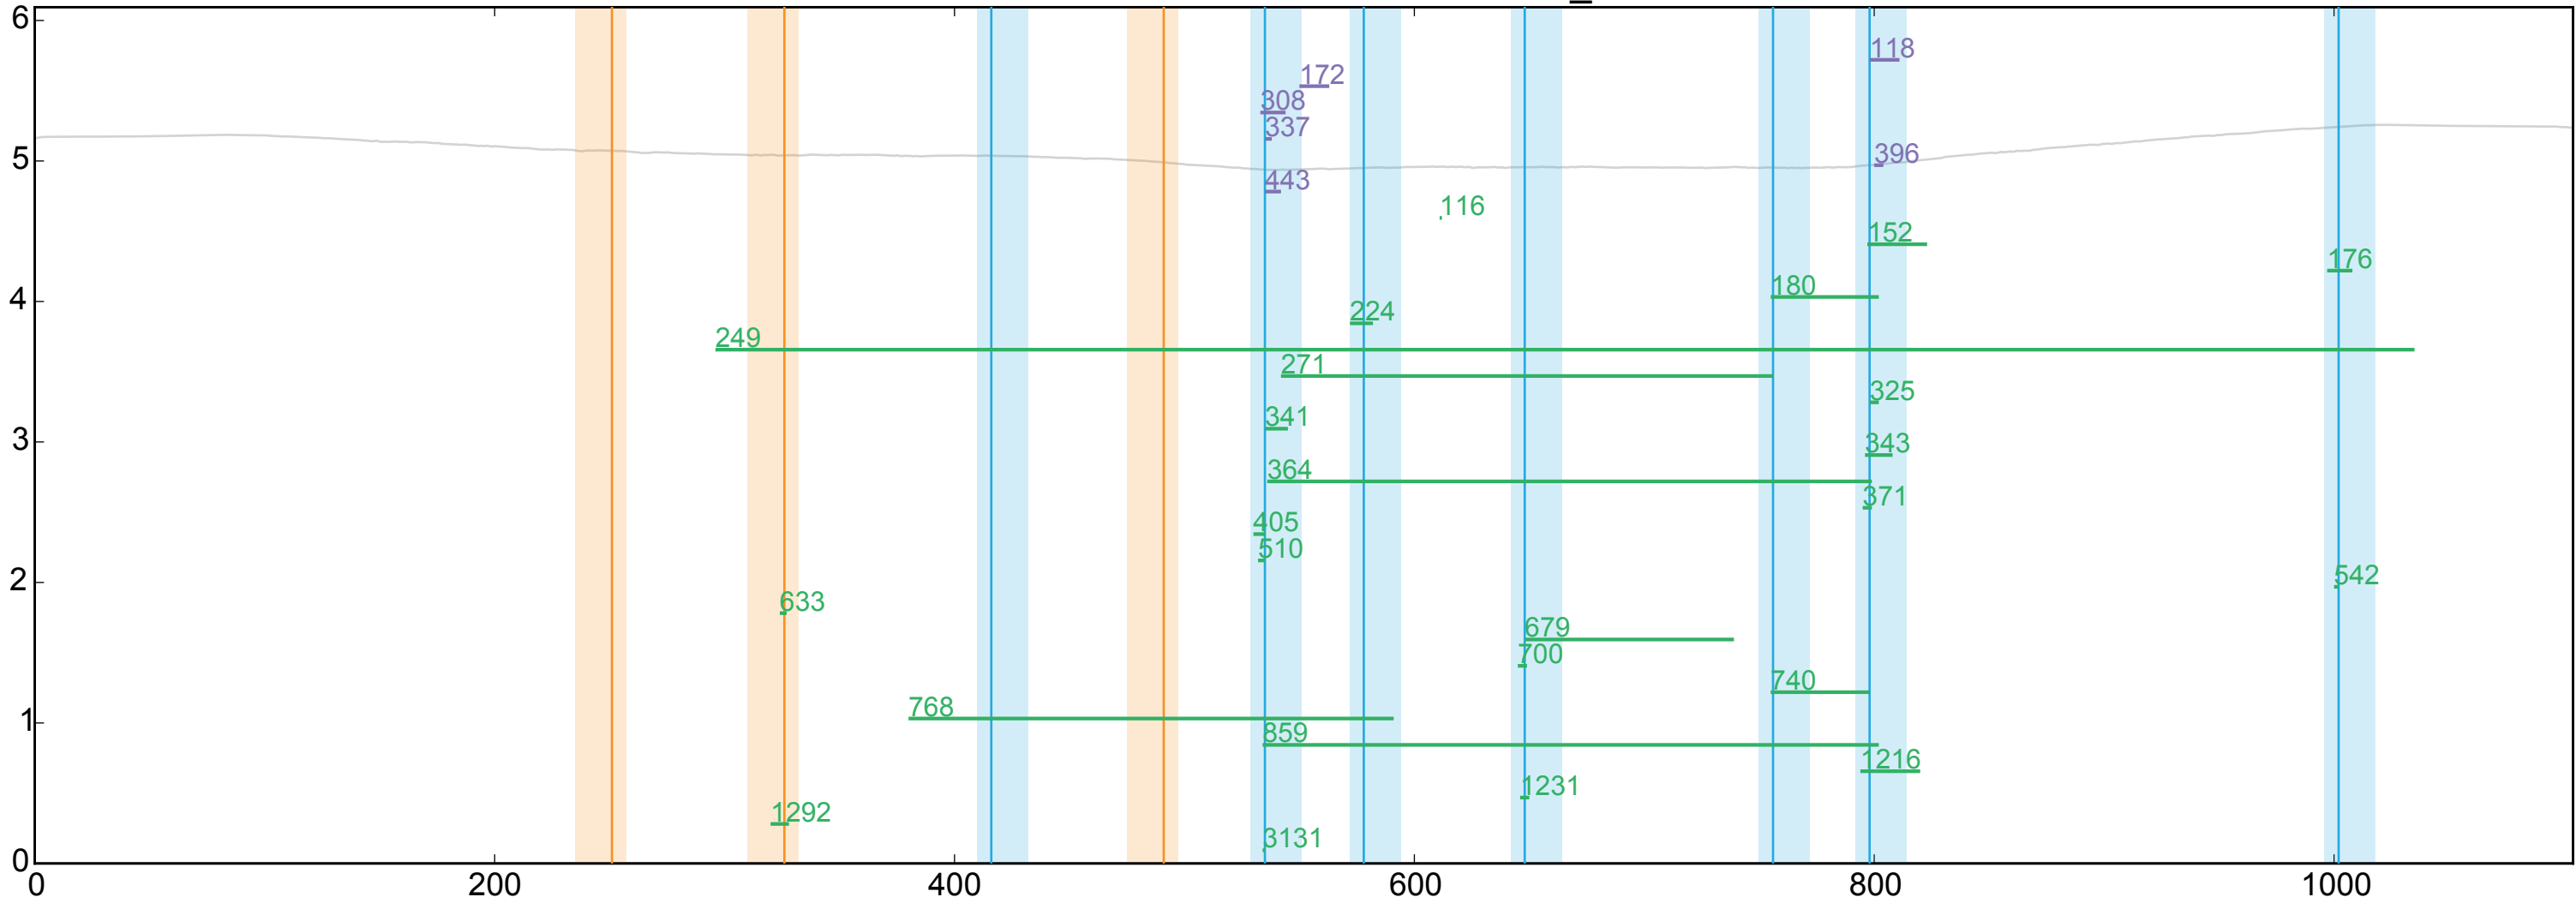

WT ENSDARG00000043130\_33

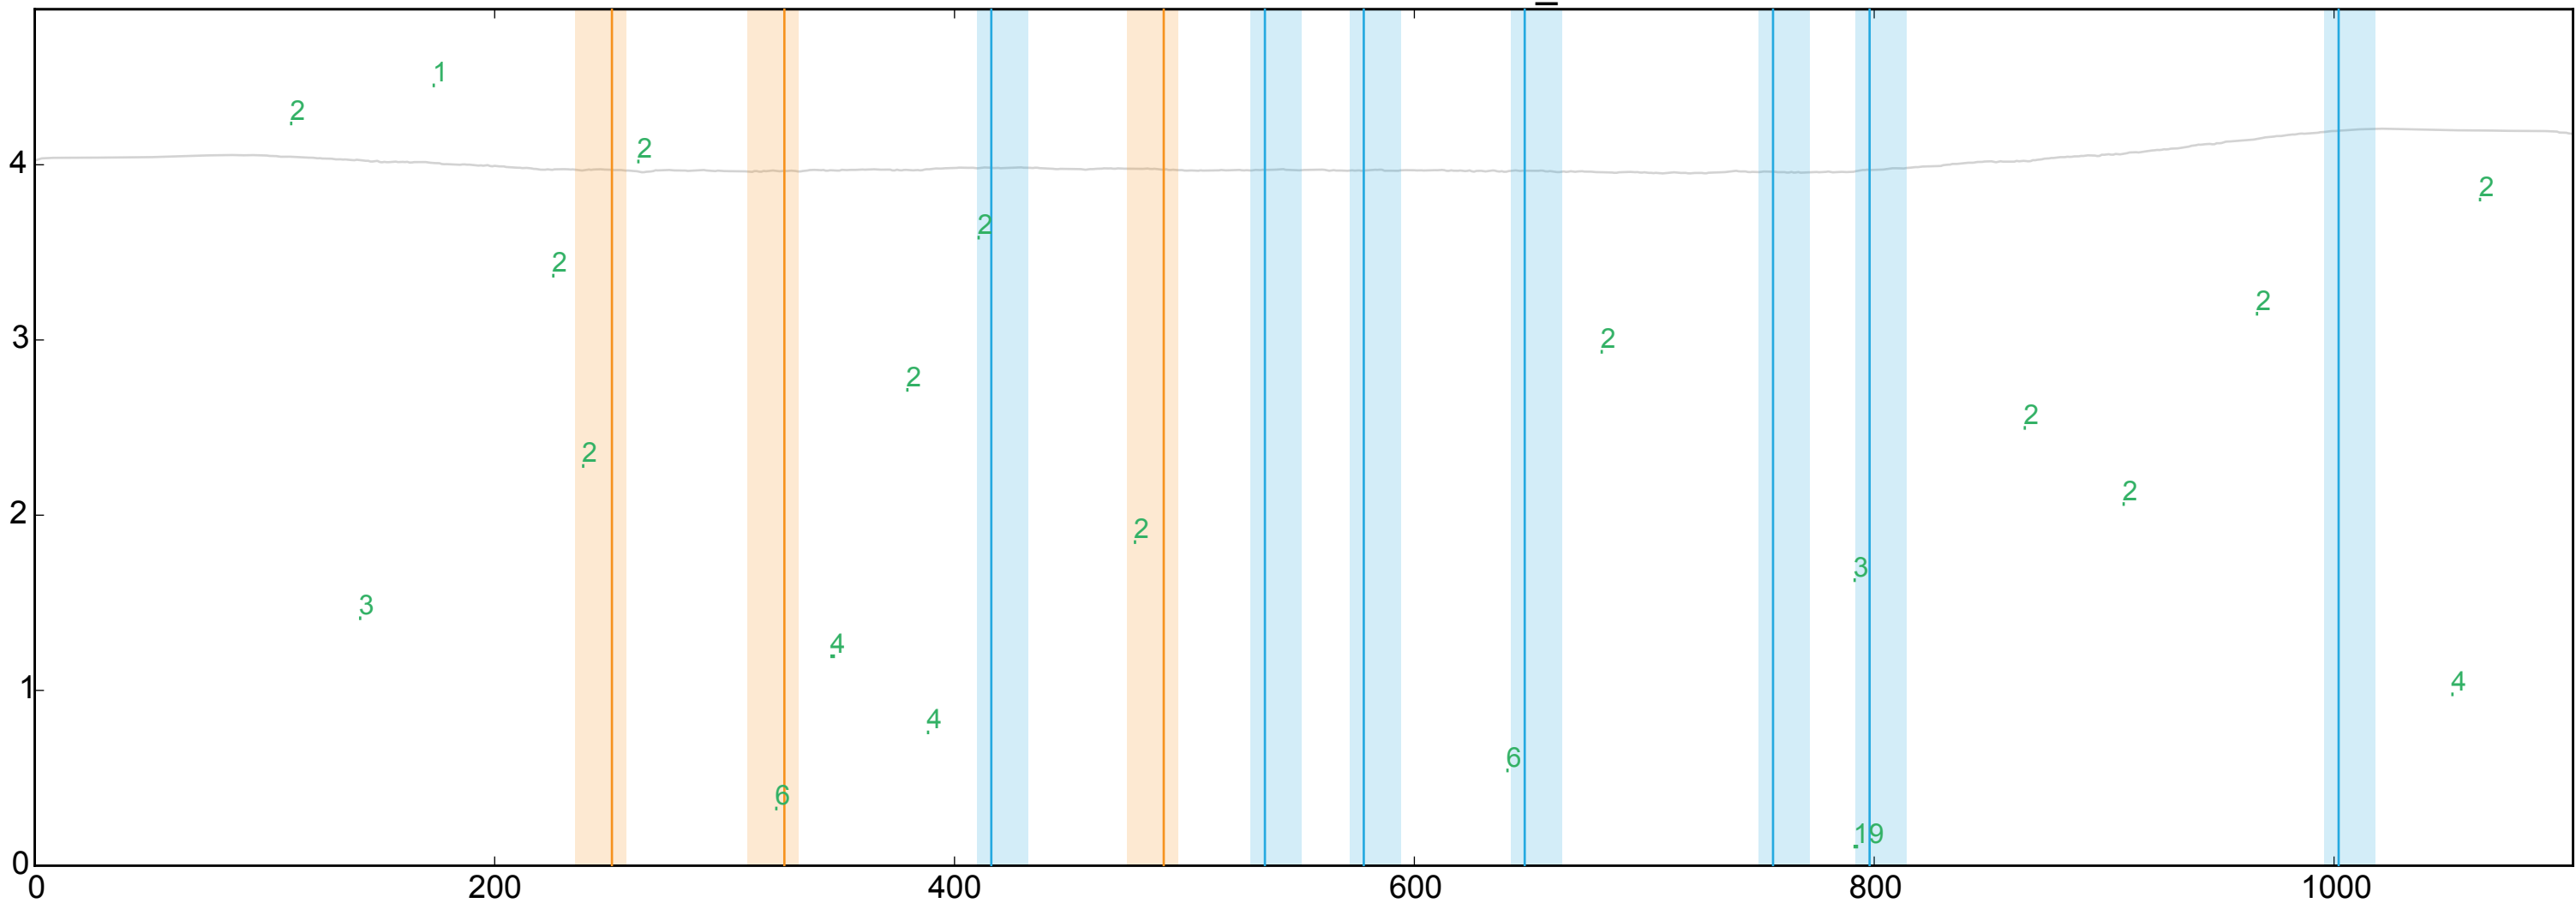



Mutant ENSDARG00000039304\_1

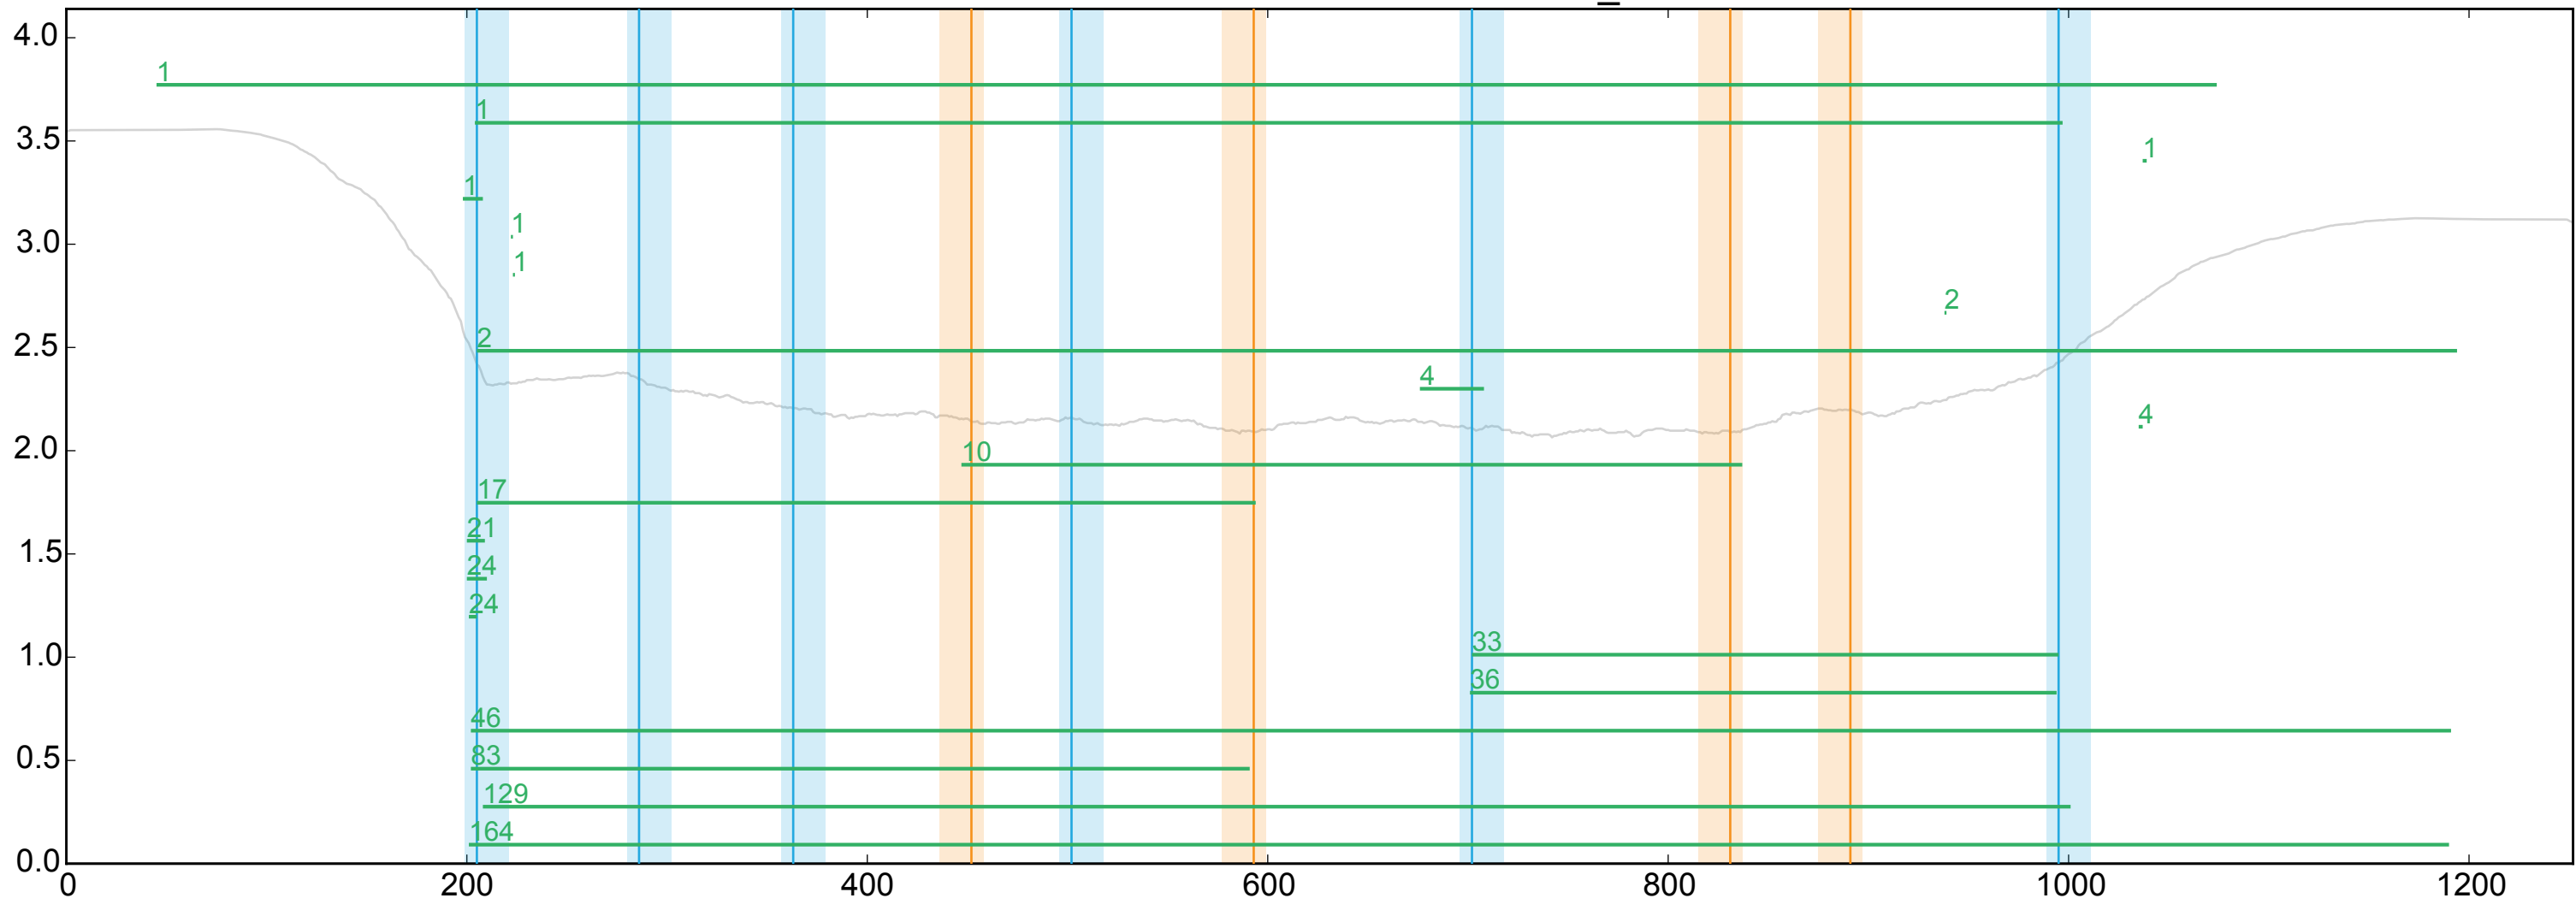

WT ENSDARG00000039304\_1

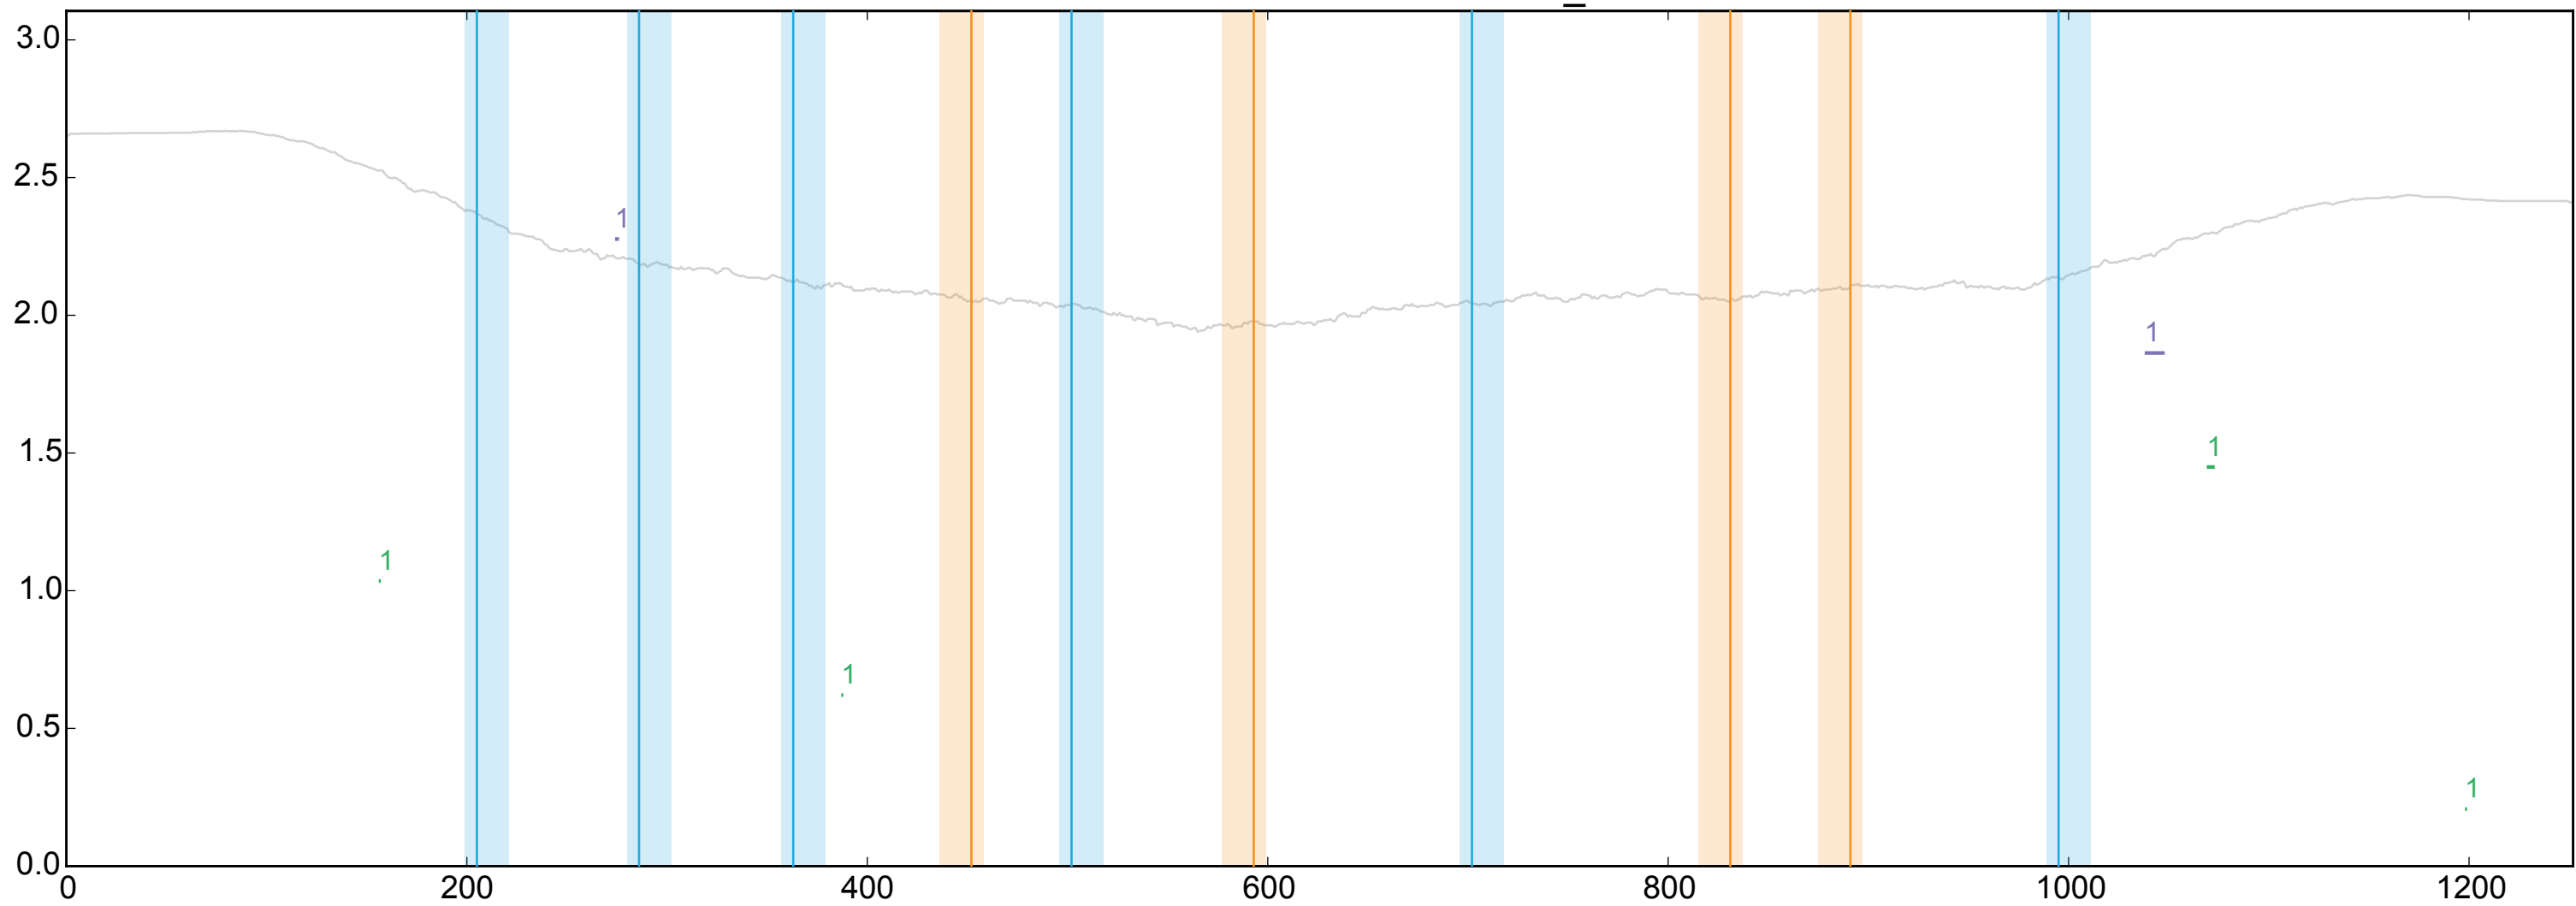

Mutant ENSDARG00000086551\_1

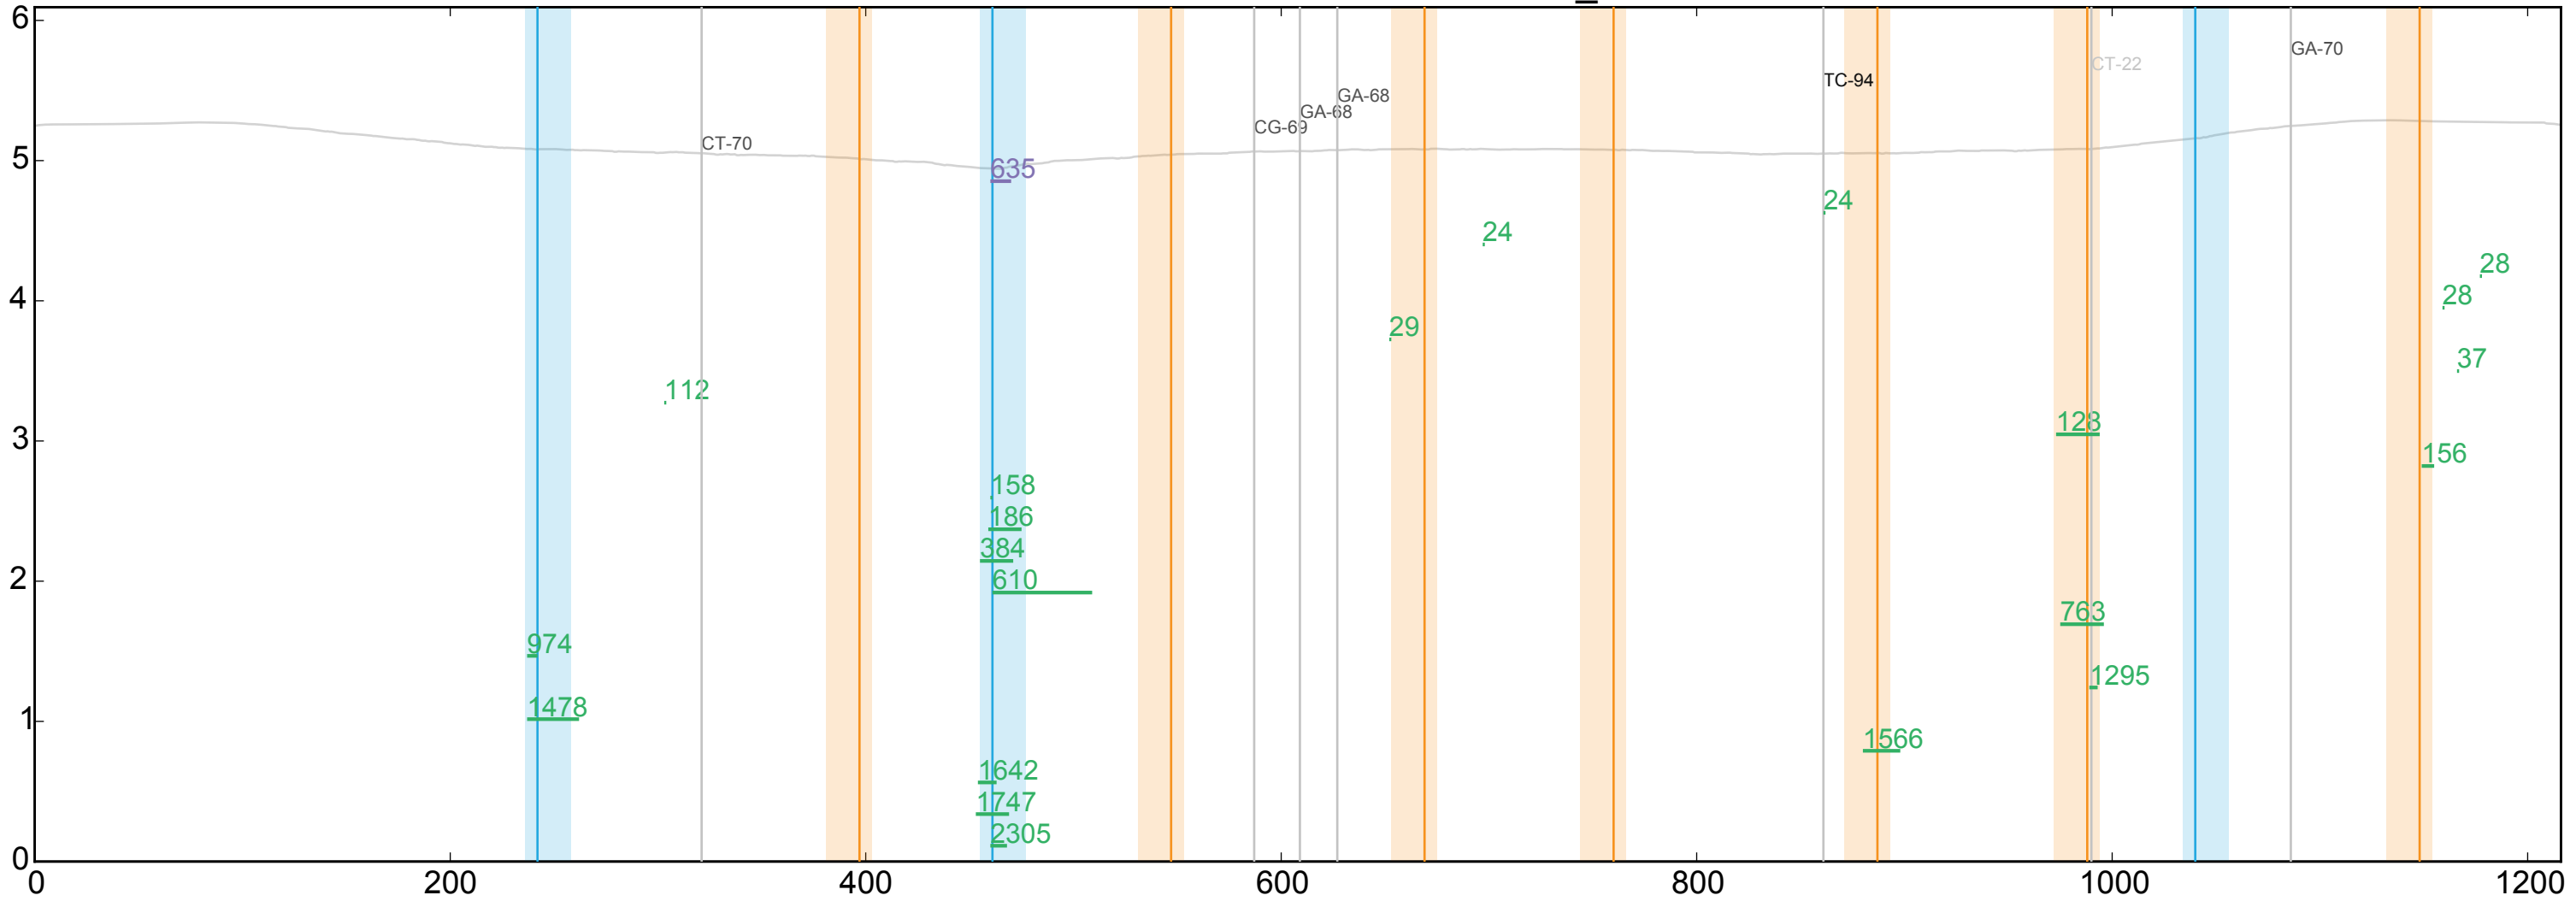

WT ENSDARG00000086551\_1

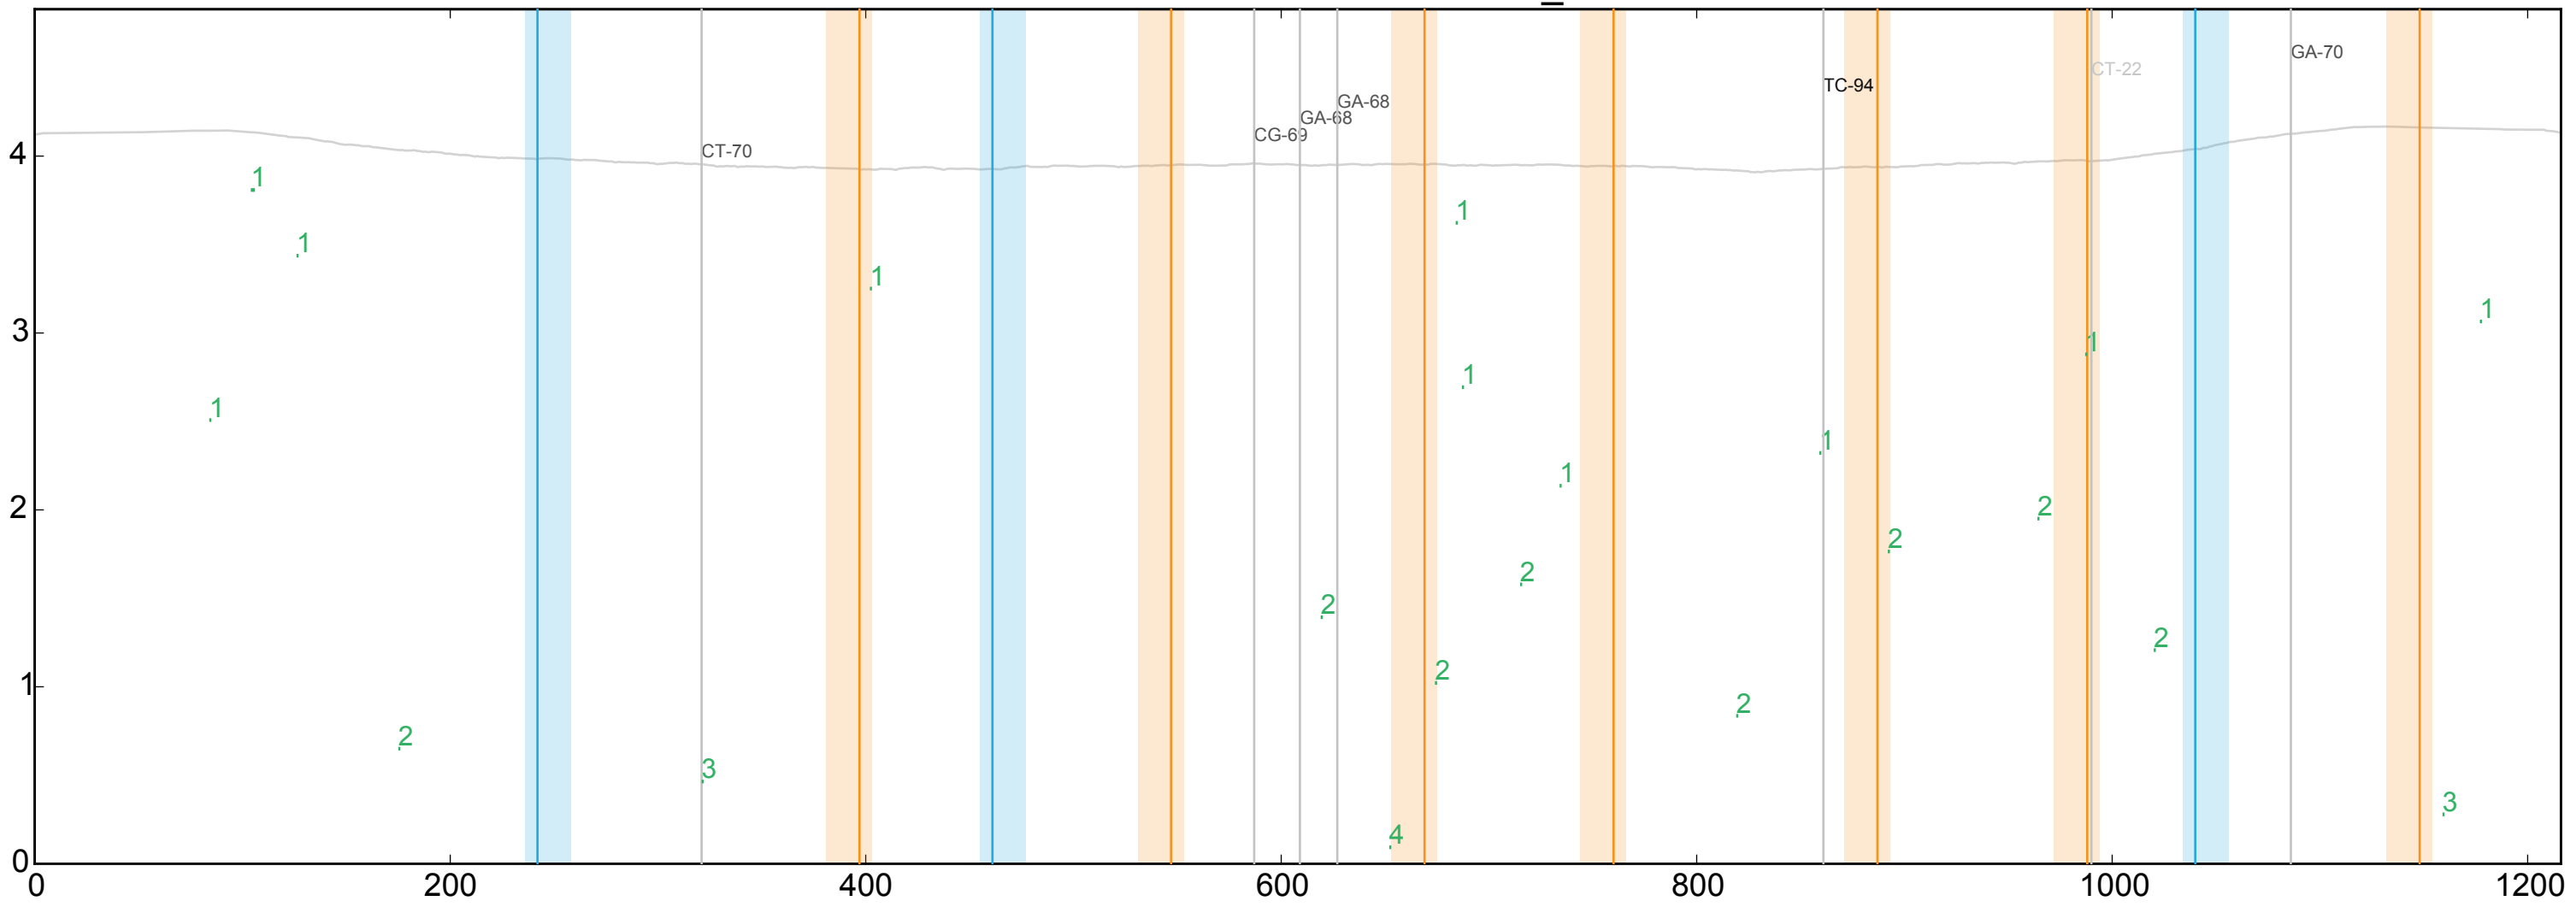

Mutant ENSDARG0000009958\_9

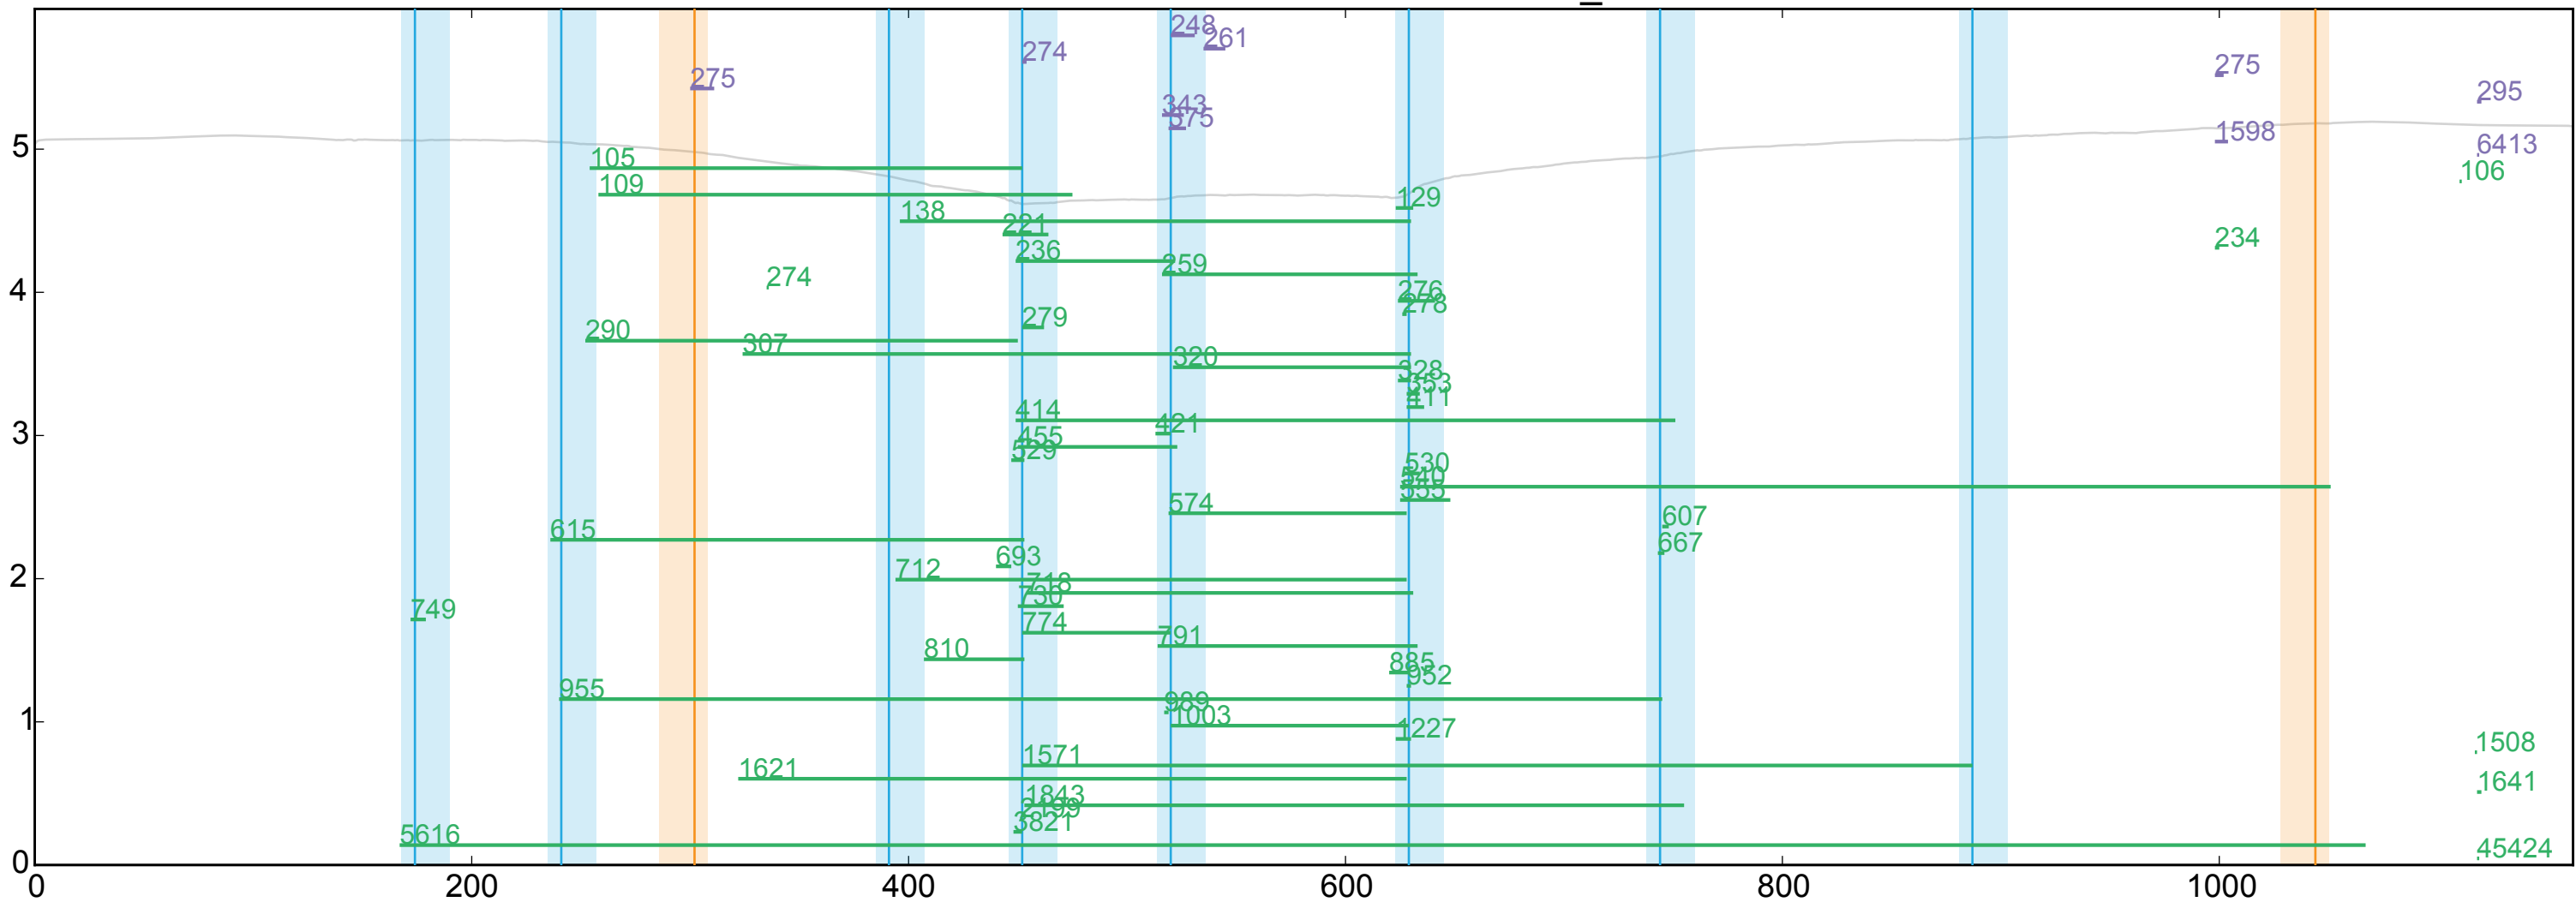

WT ENSDARG0000009958\_9

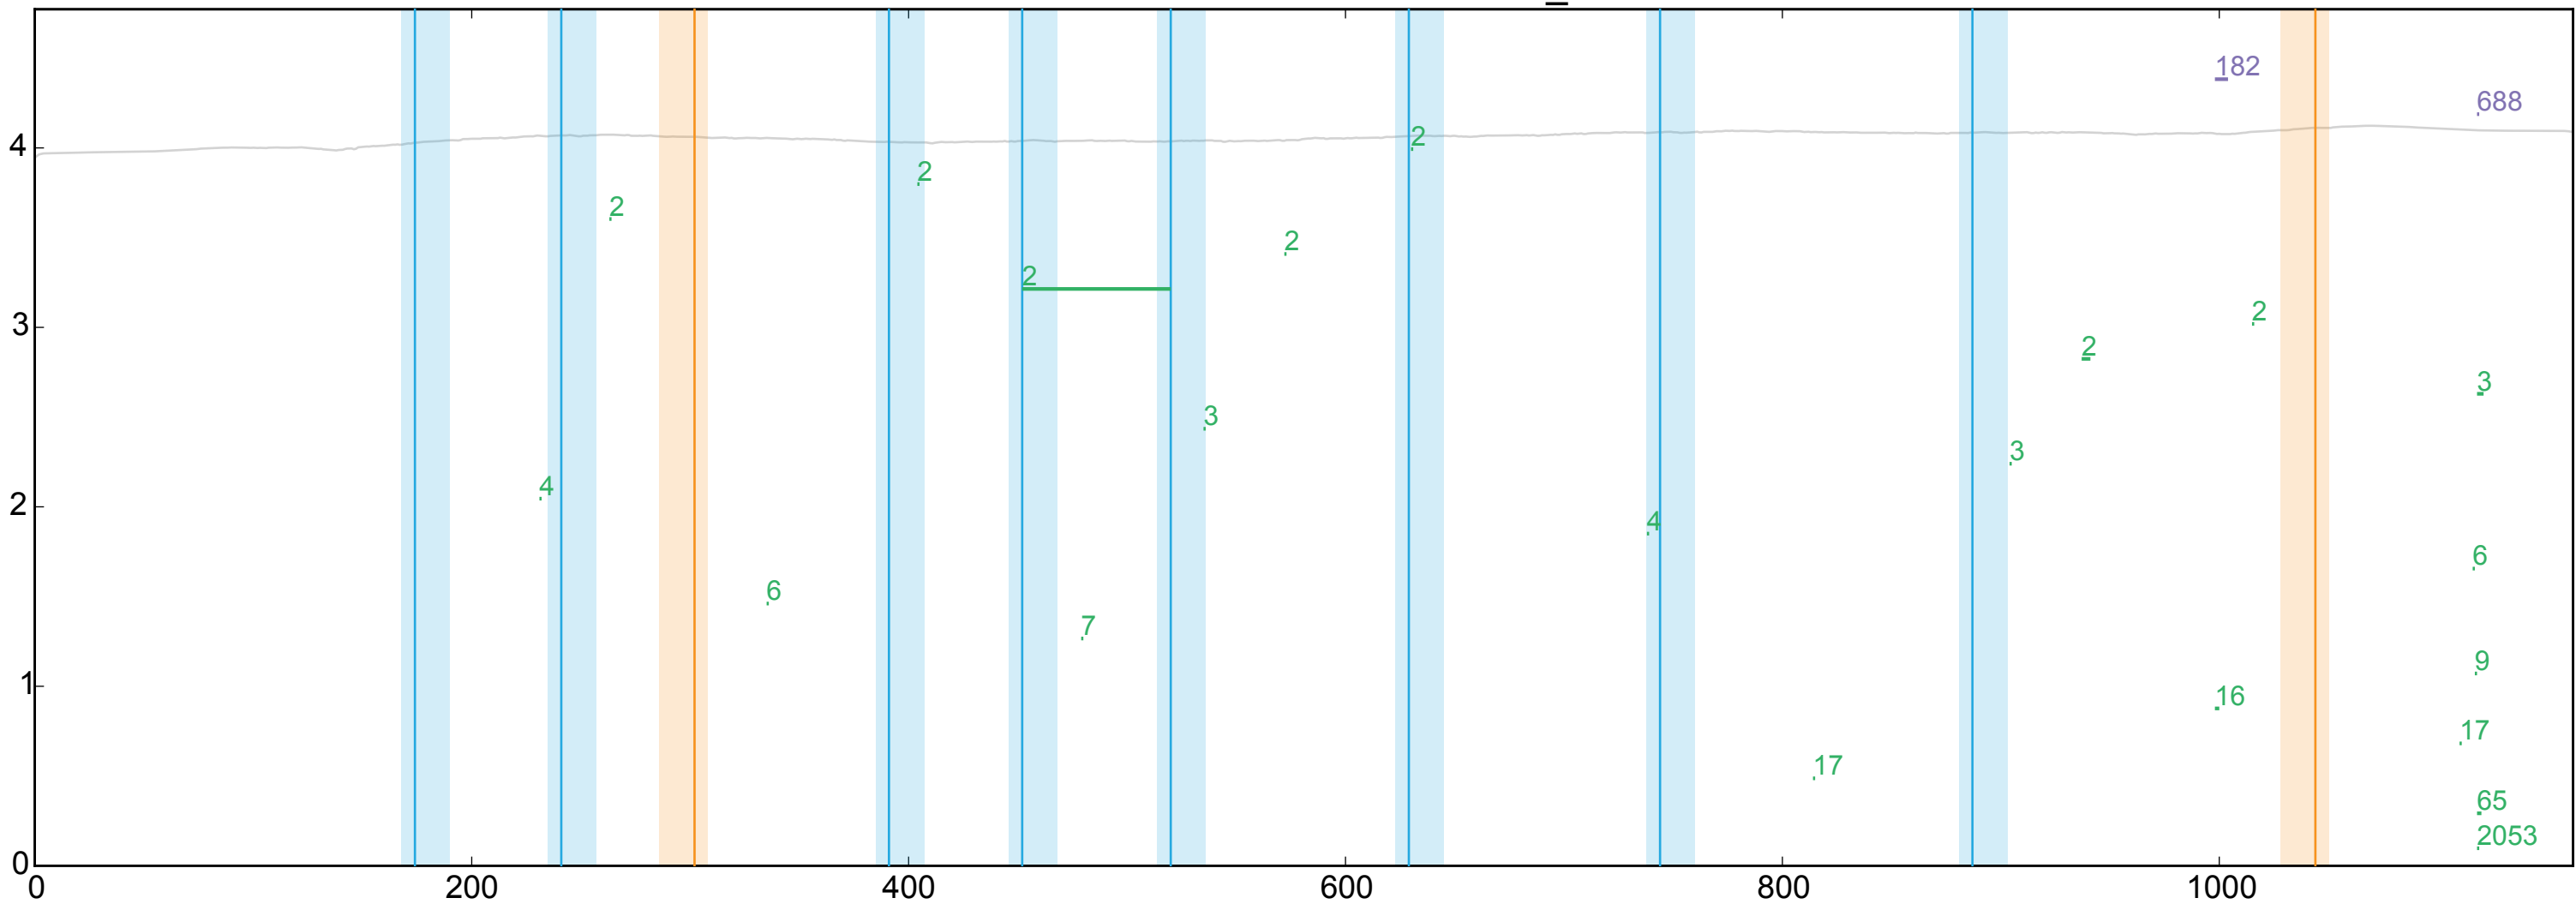

Mutant ENSDARG00000073801\_2

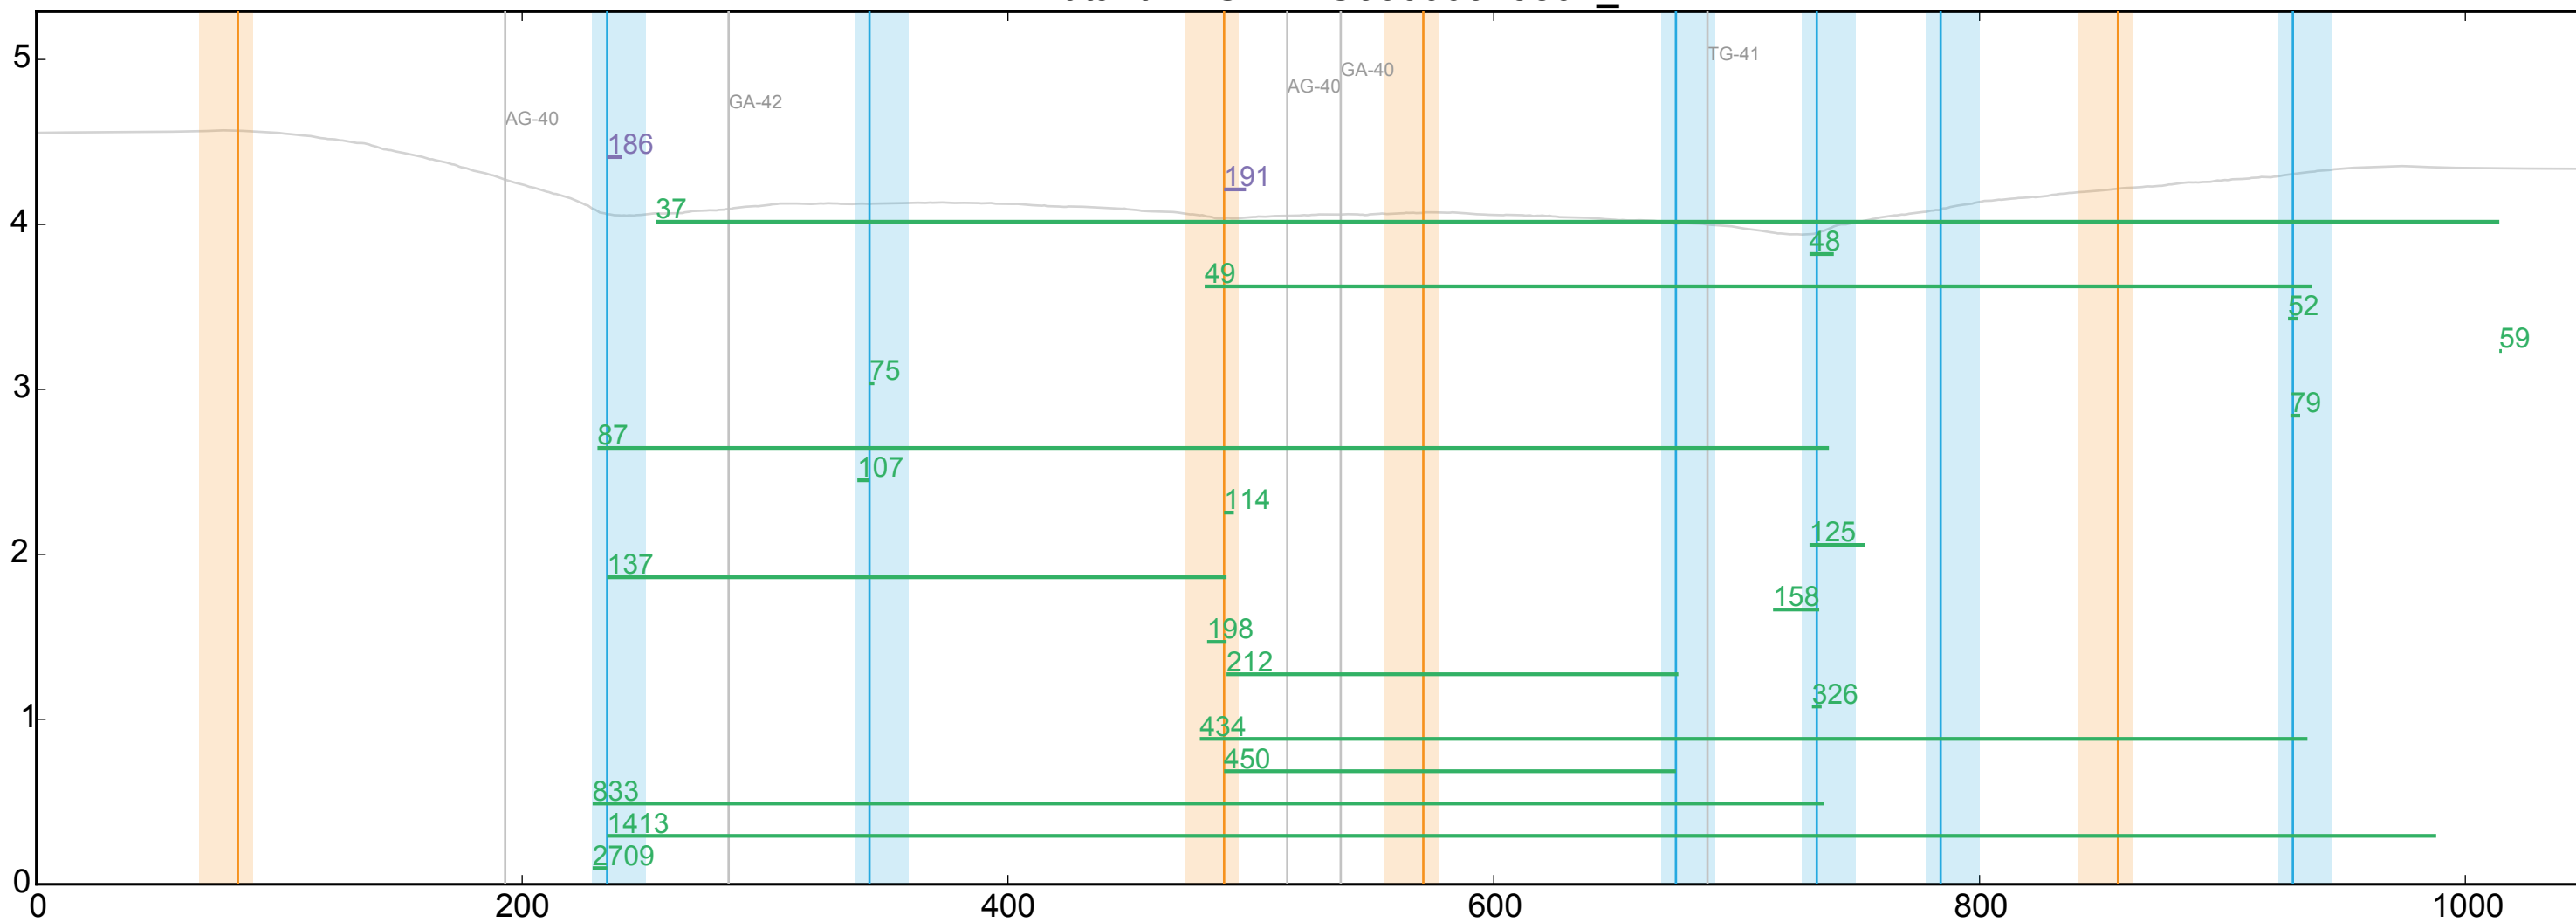

WT ENSDARG00000073801\_2

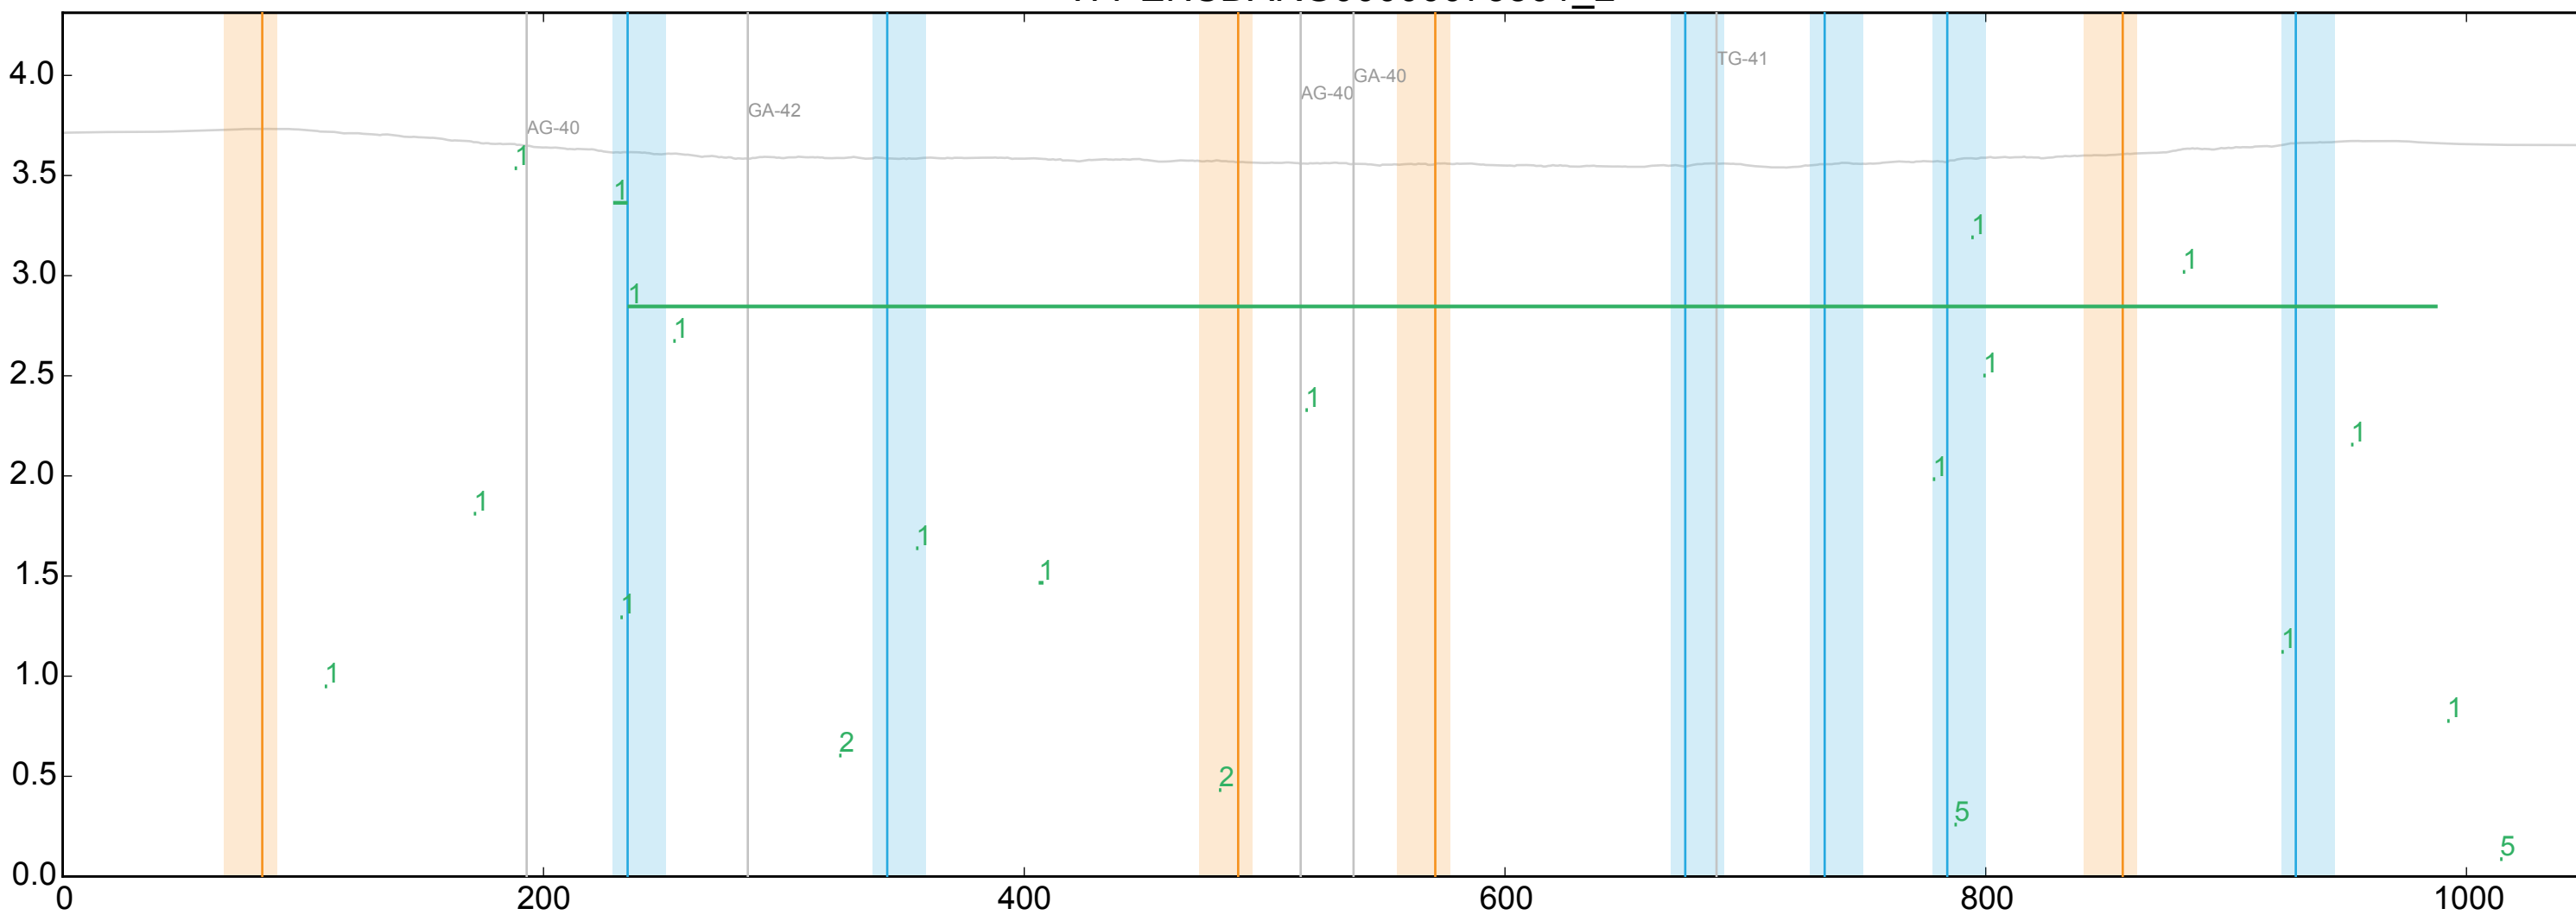

Mutant ENSDARG00000088789\_1

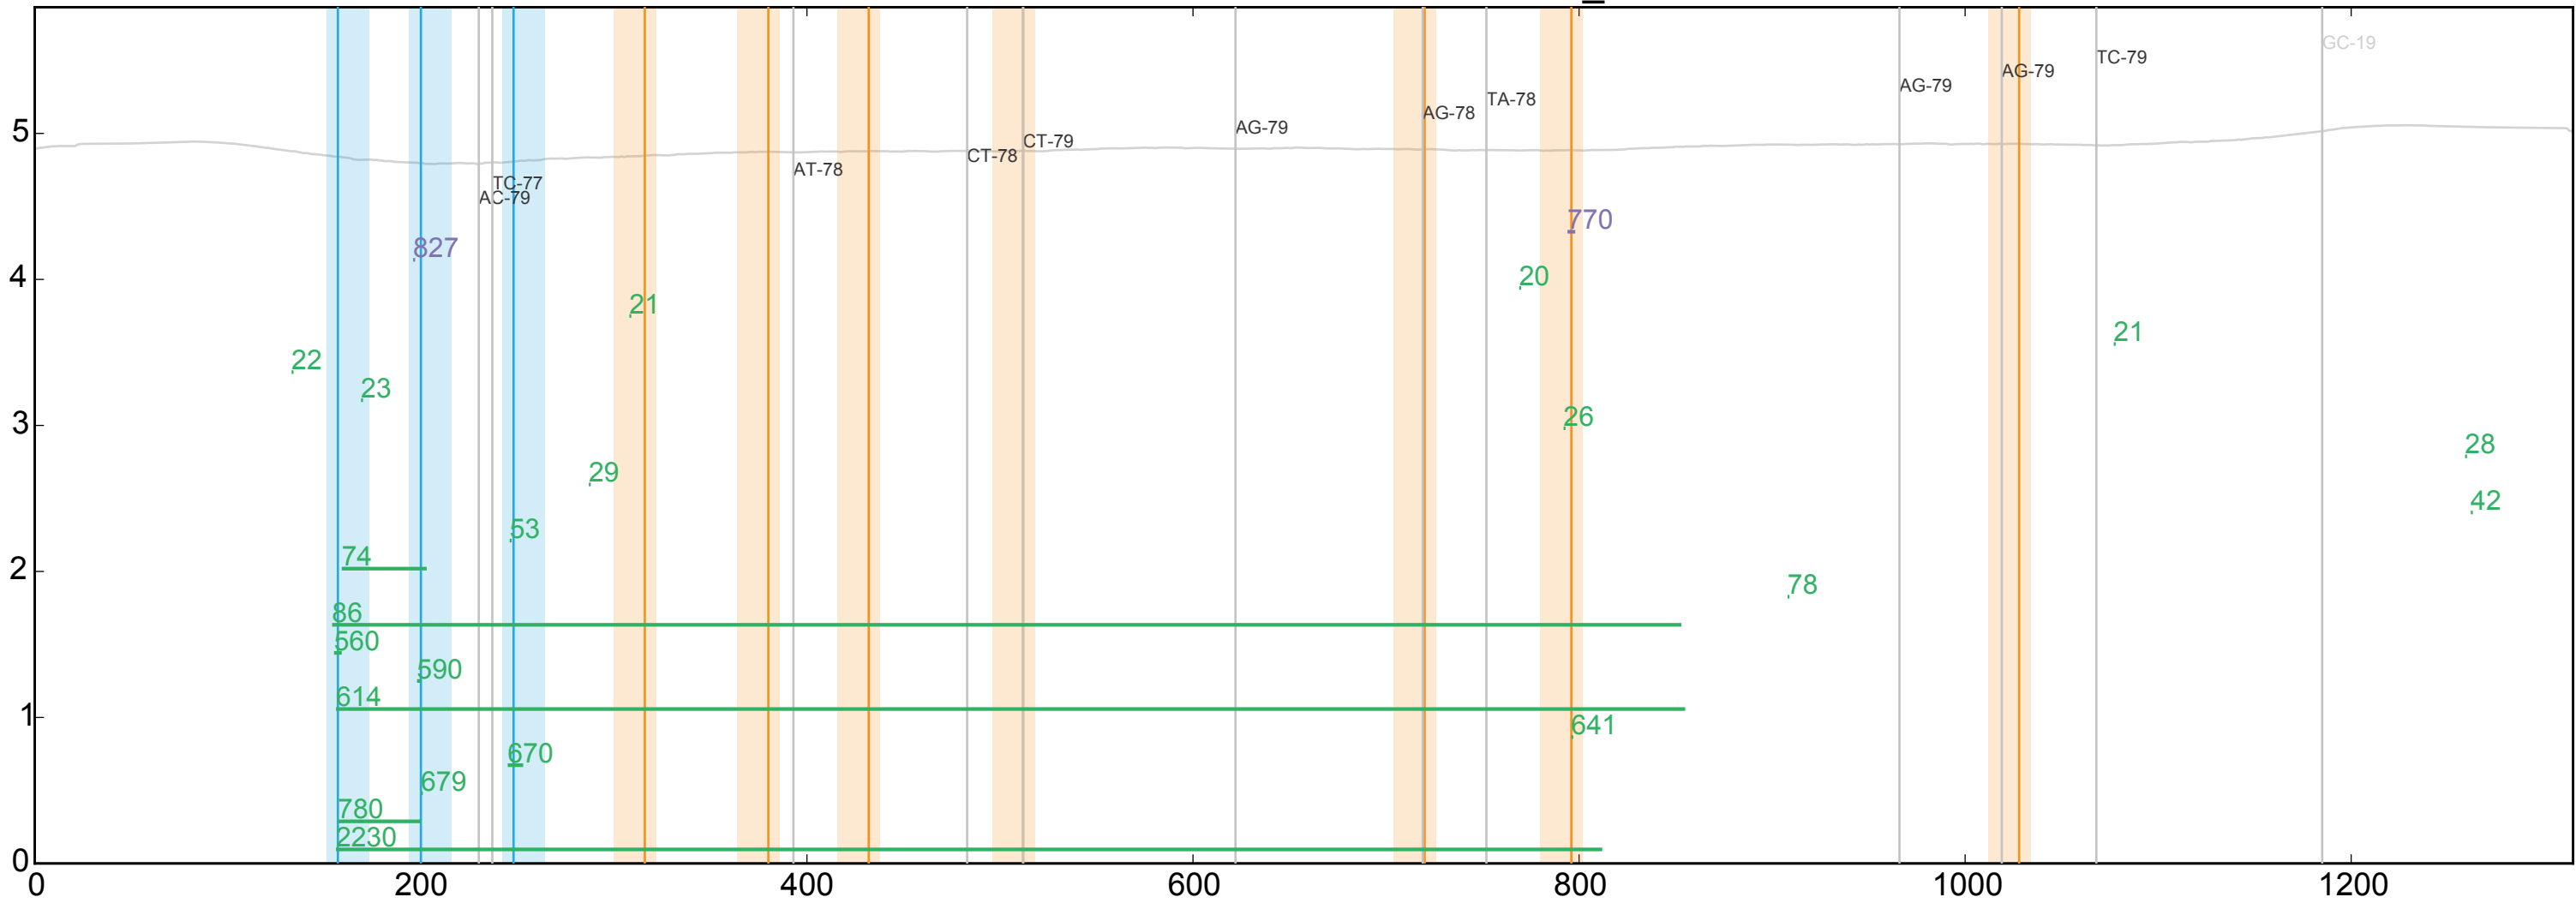

WT ENSDARG00000088789\_1

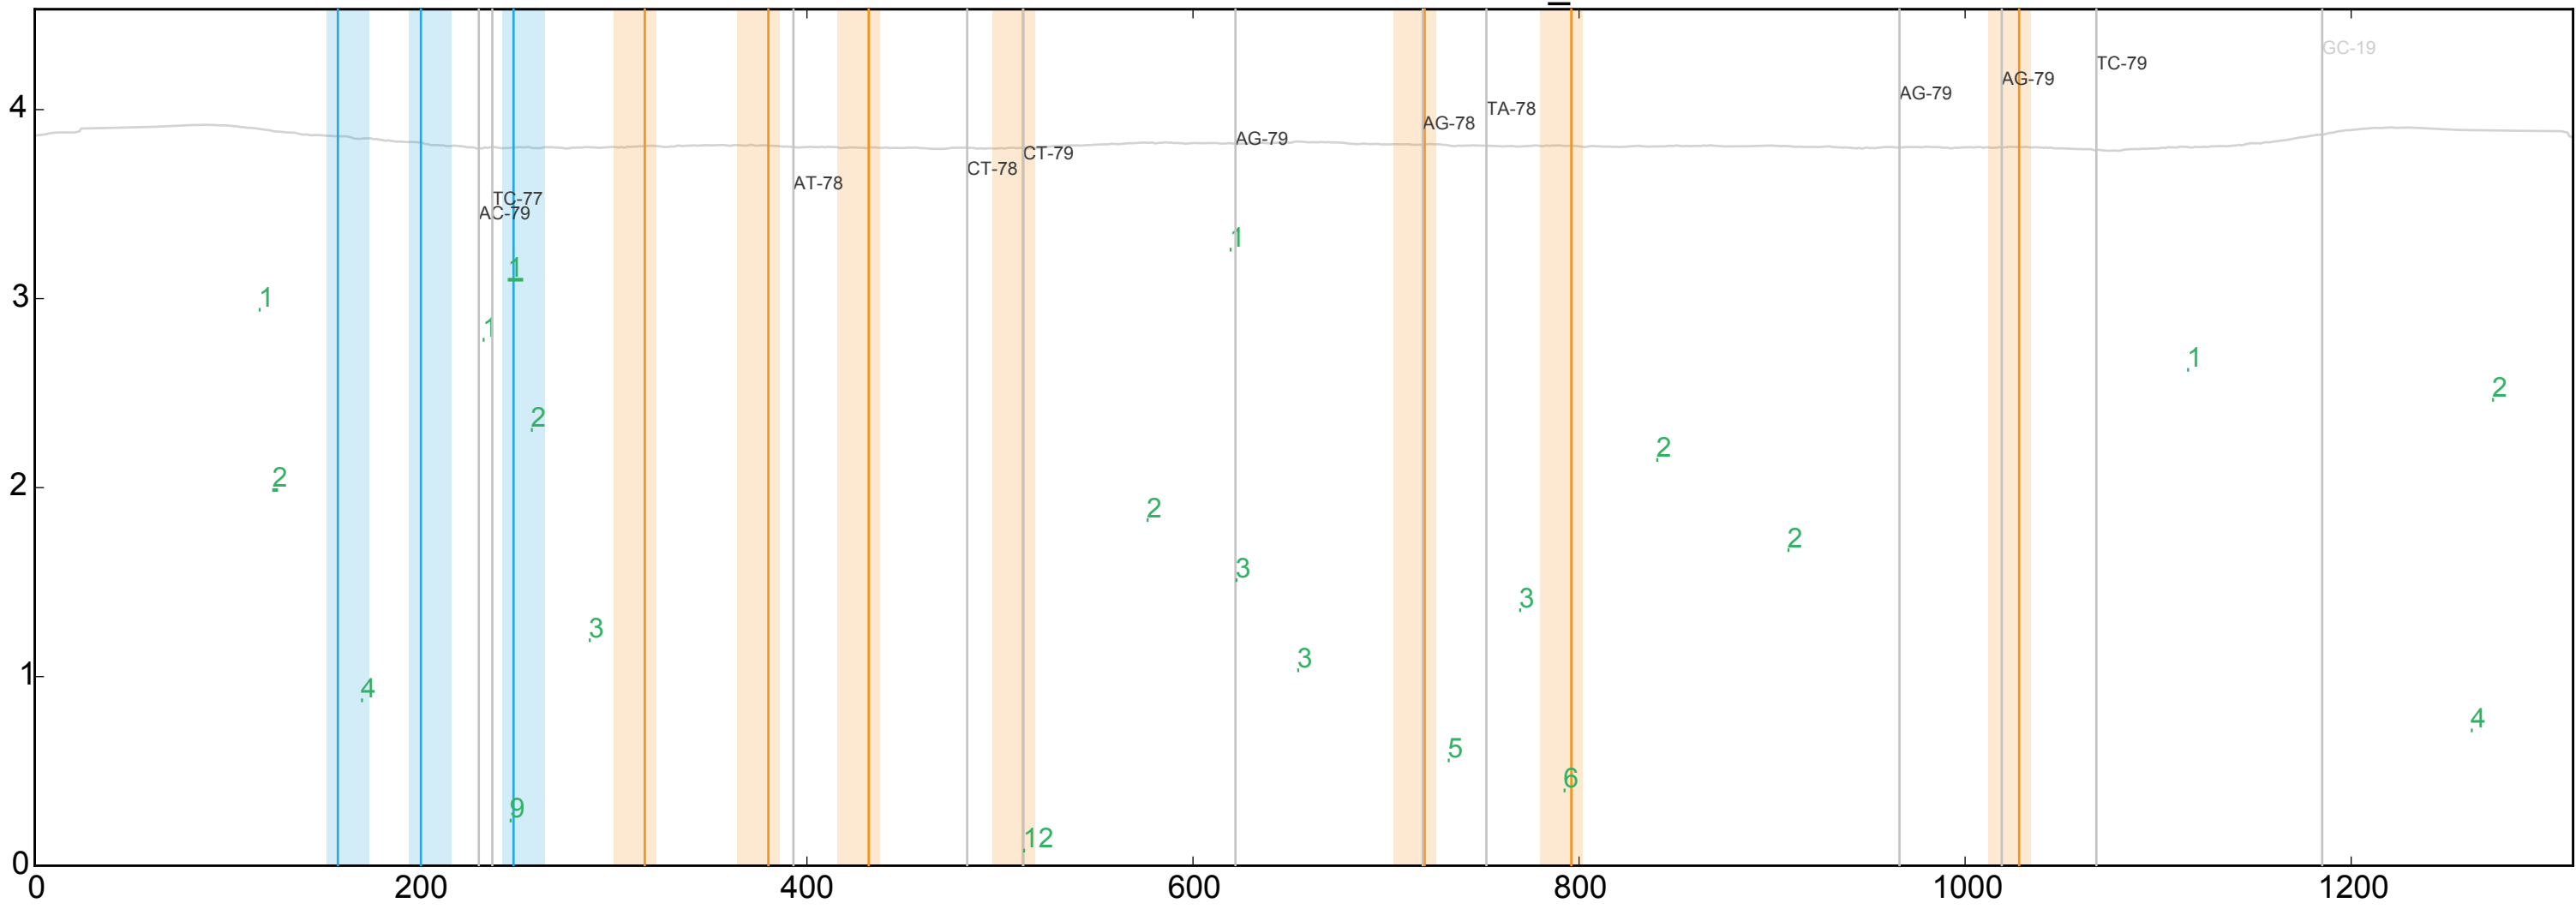

Mutant ENSDARG00000078251\_0

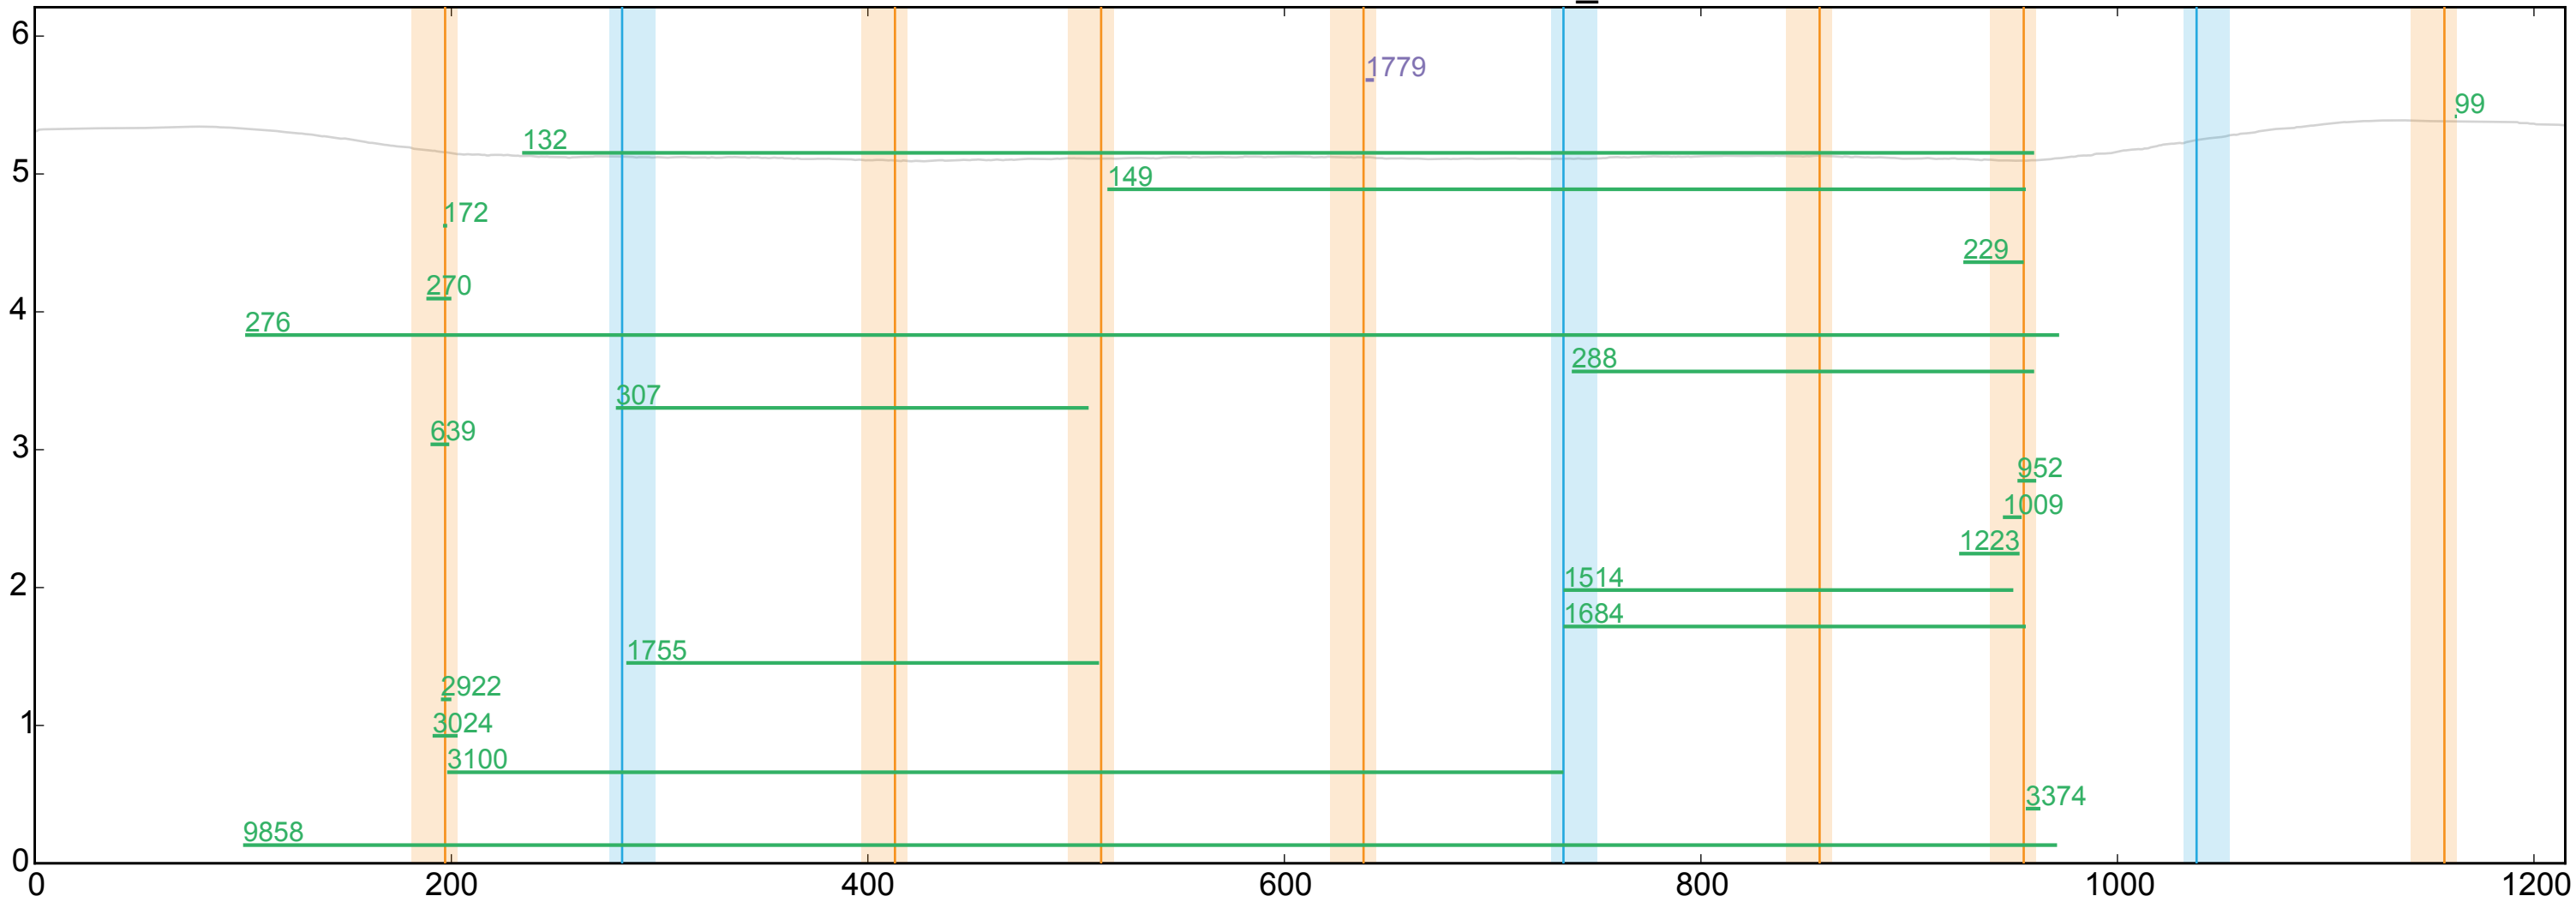

WT ENSDARG00000078251\_0

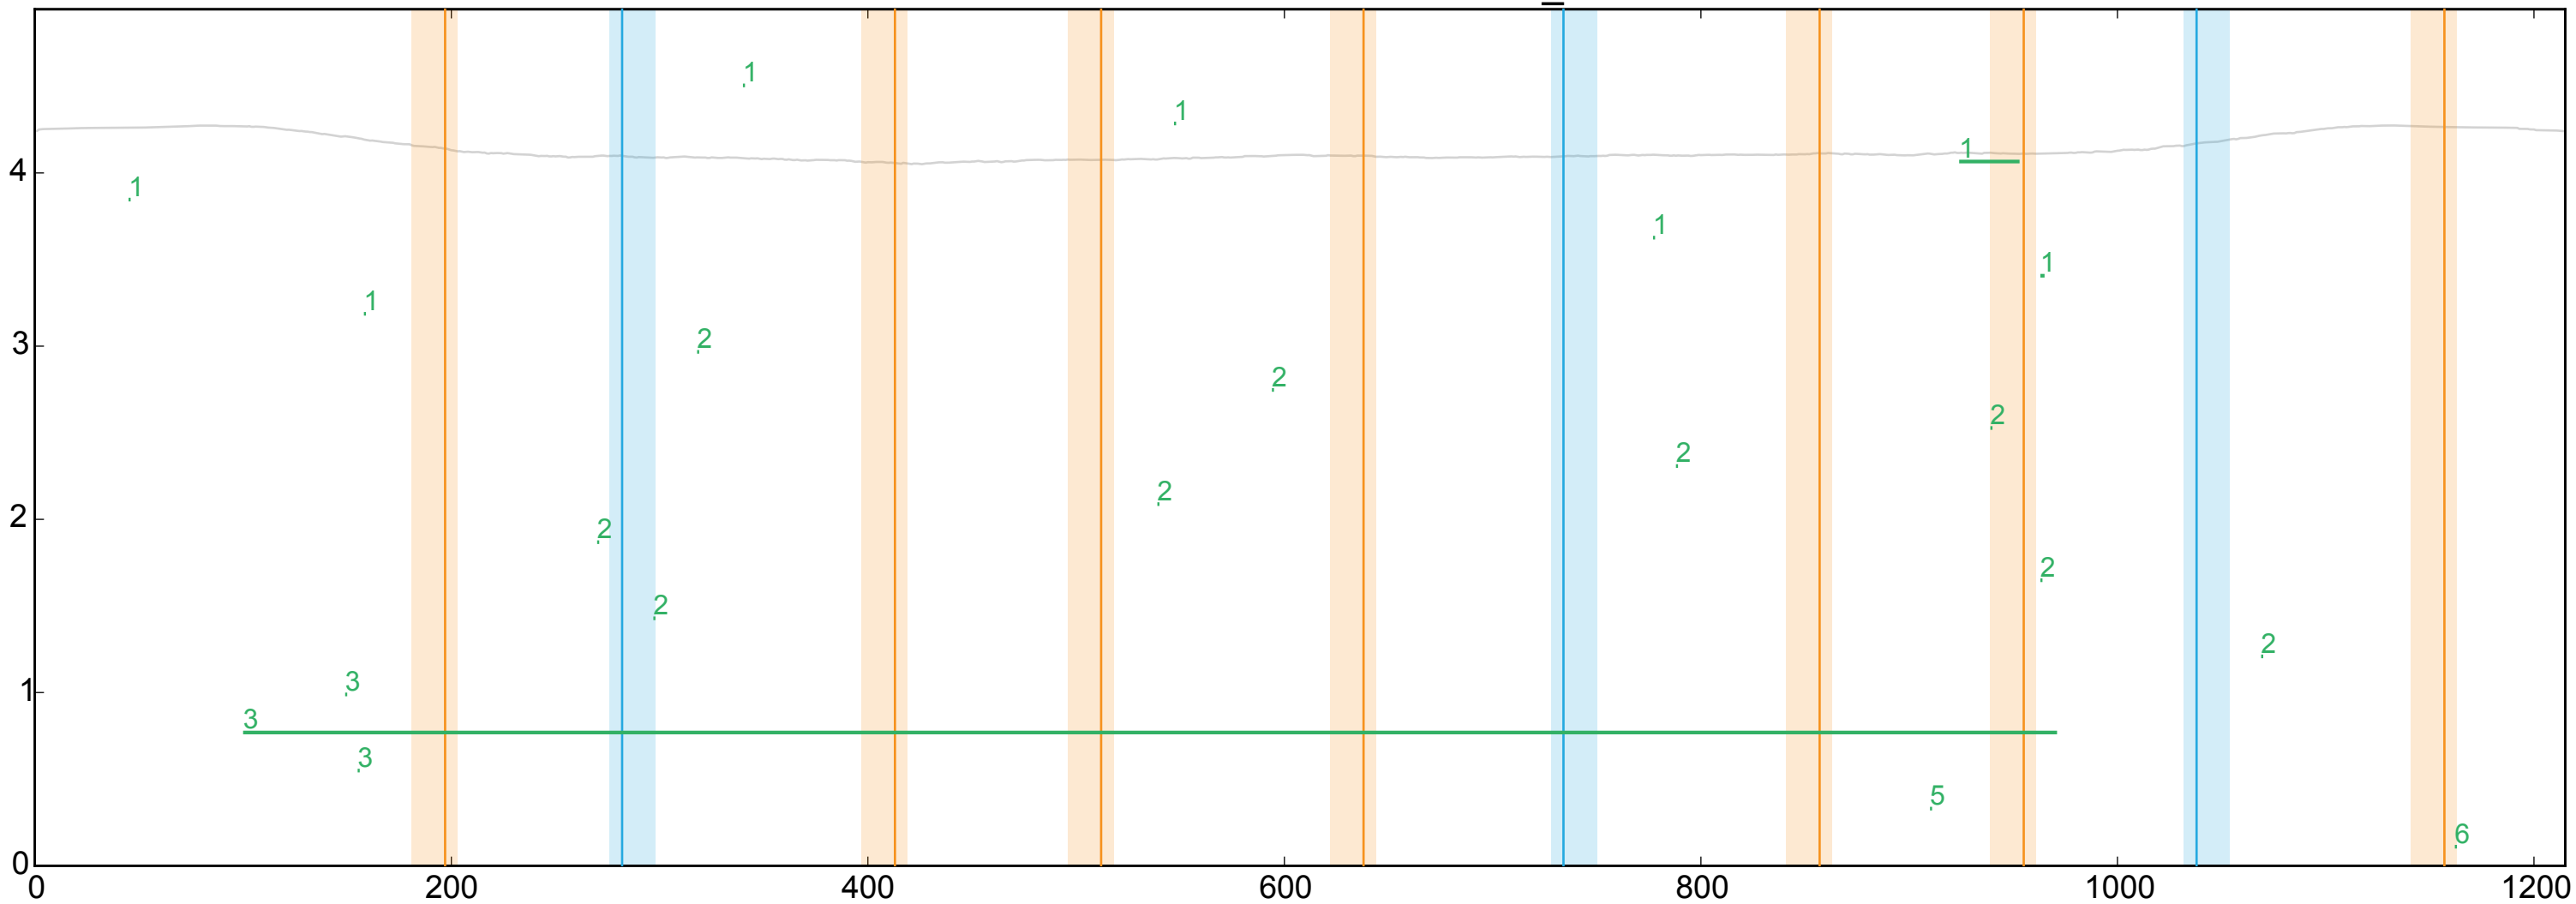



Mutant ENSDARG00000043246\_3

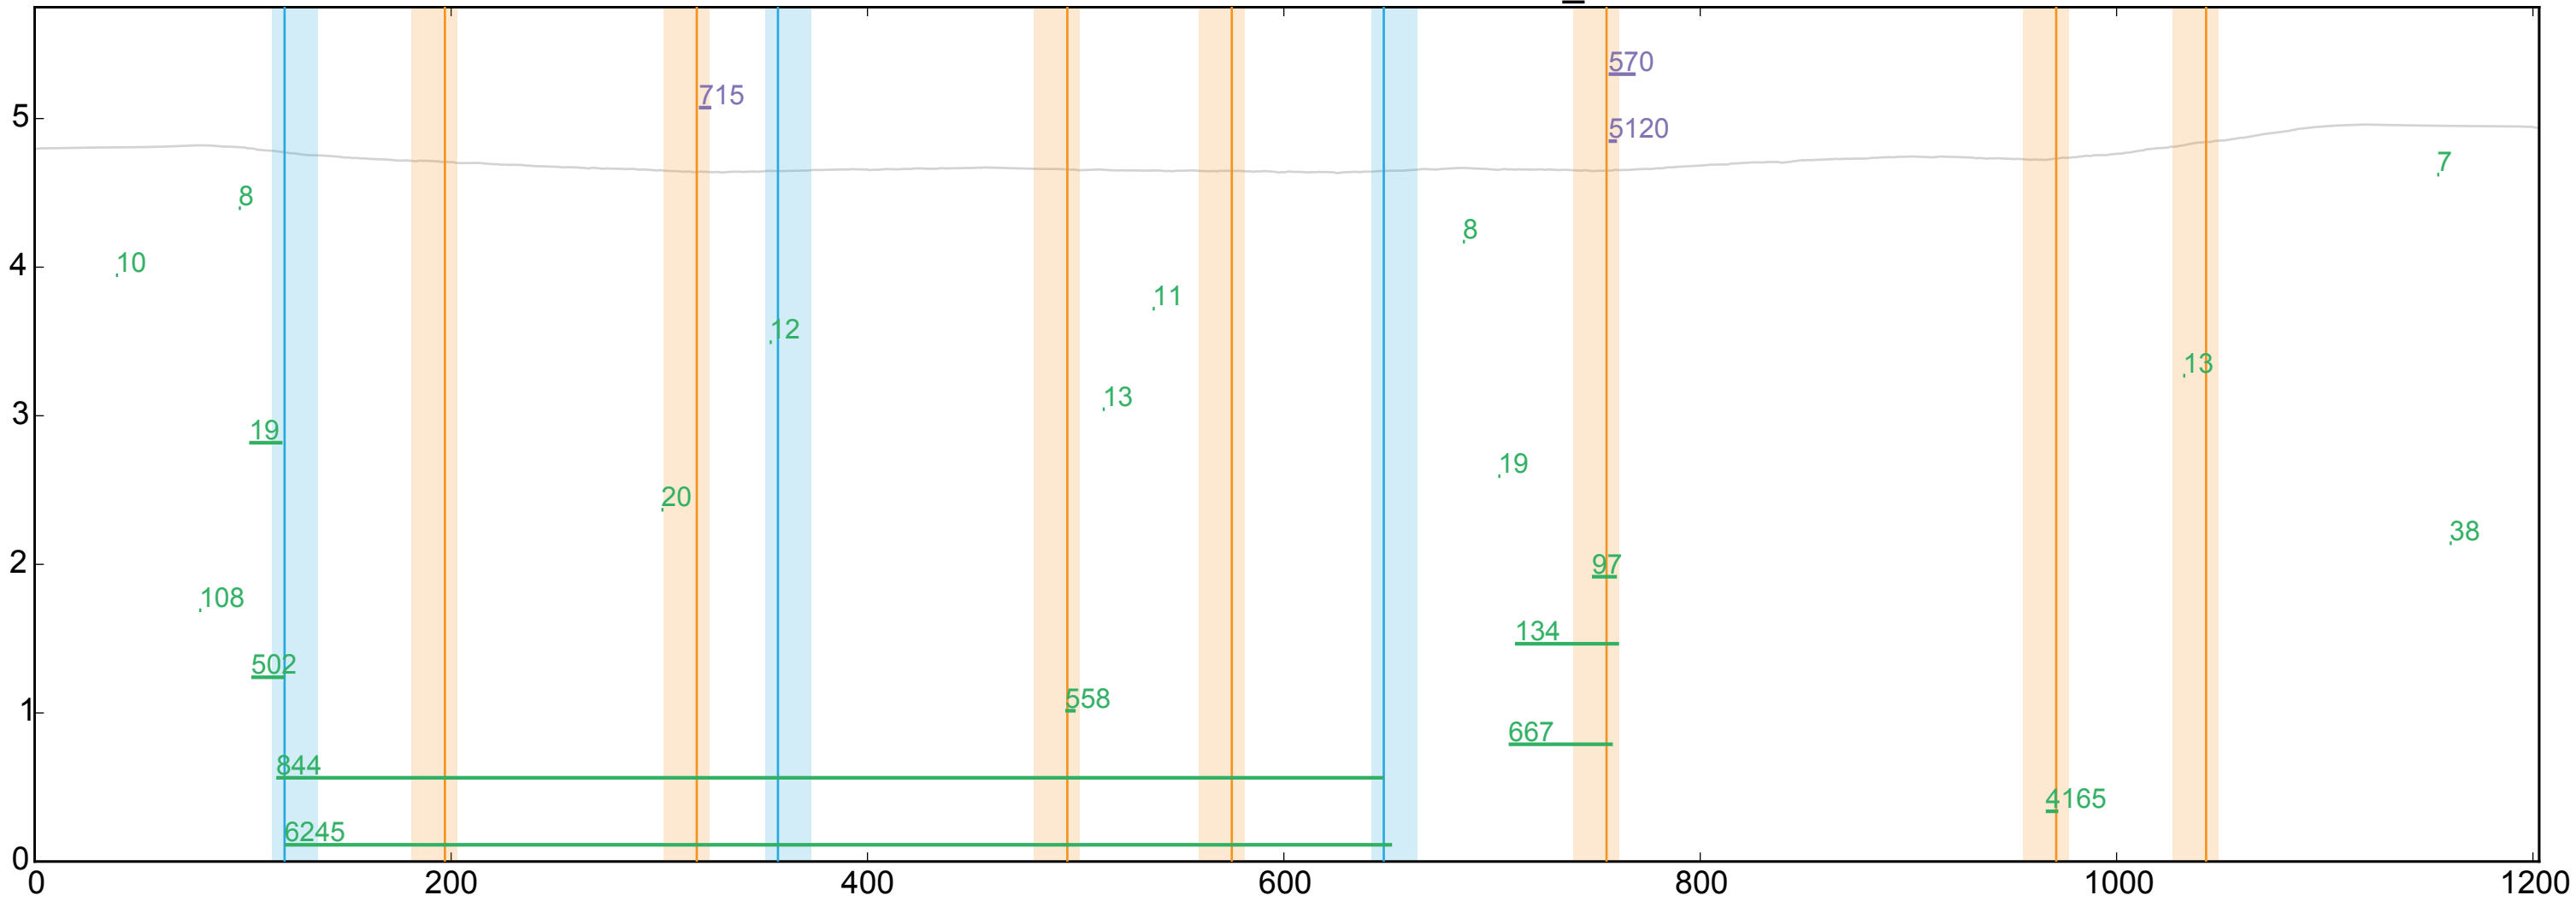

WT ENSDARG00000043246\_3

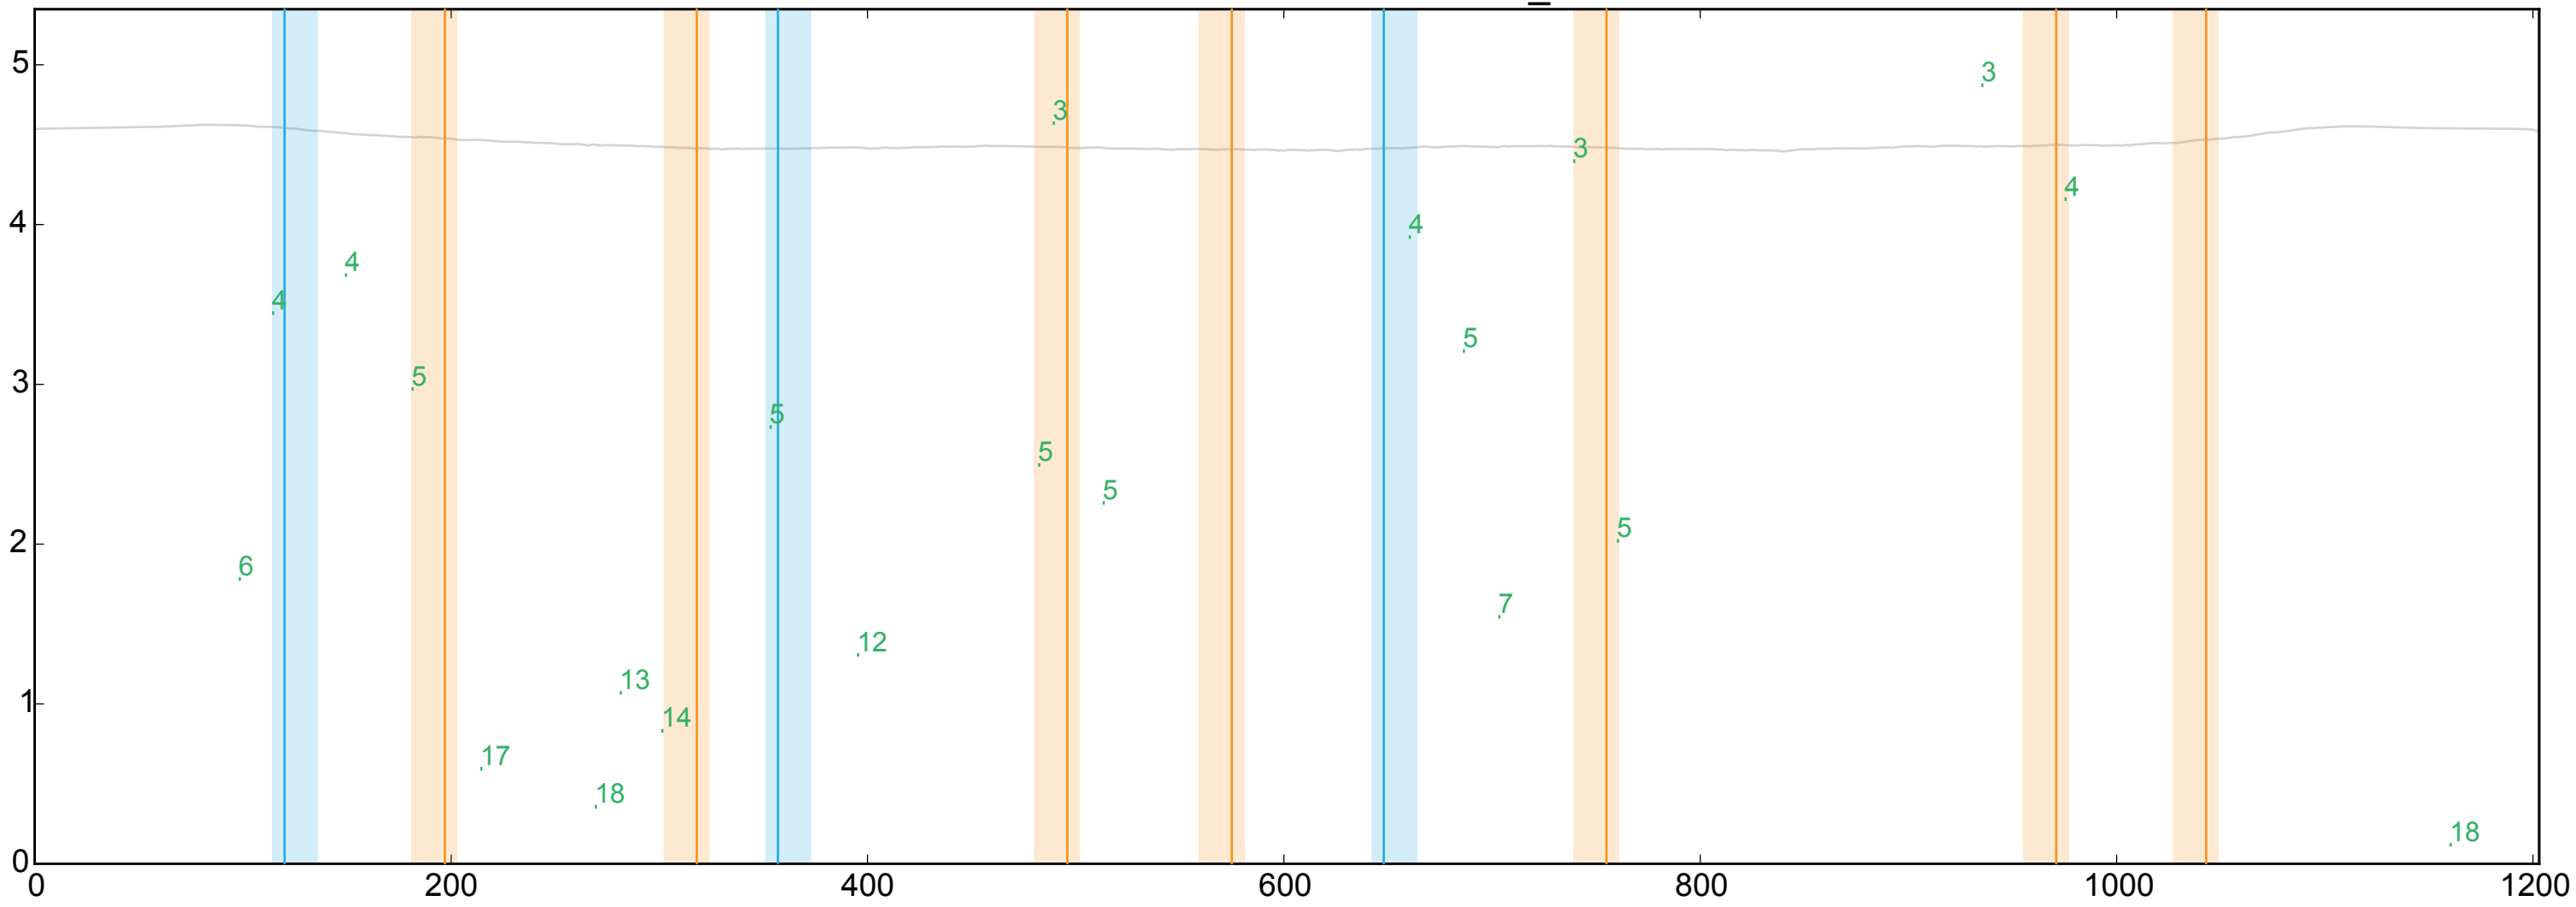

Mutant ENSDARG00000057582\_0

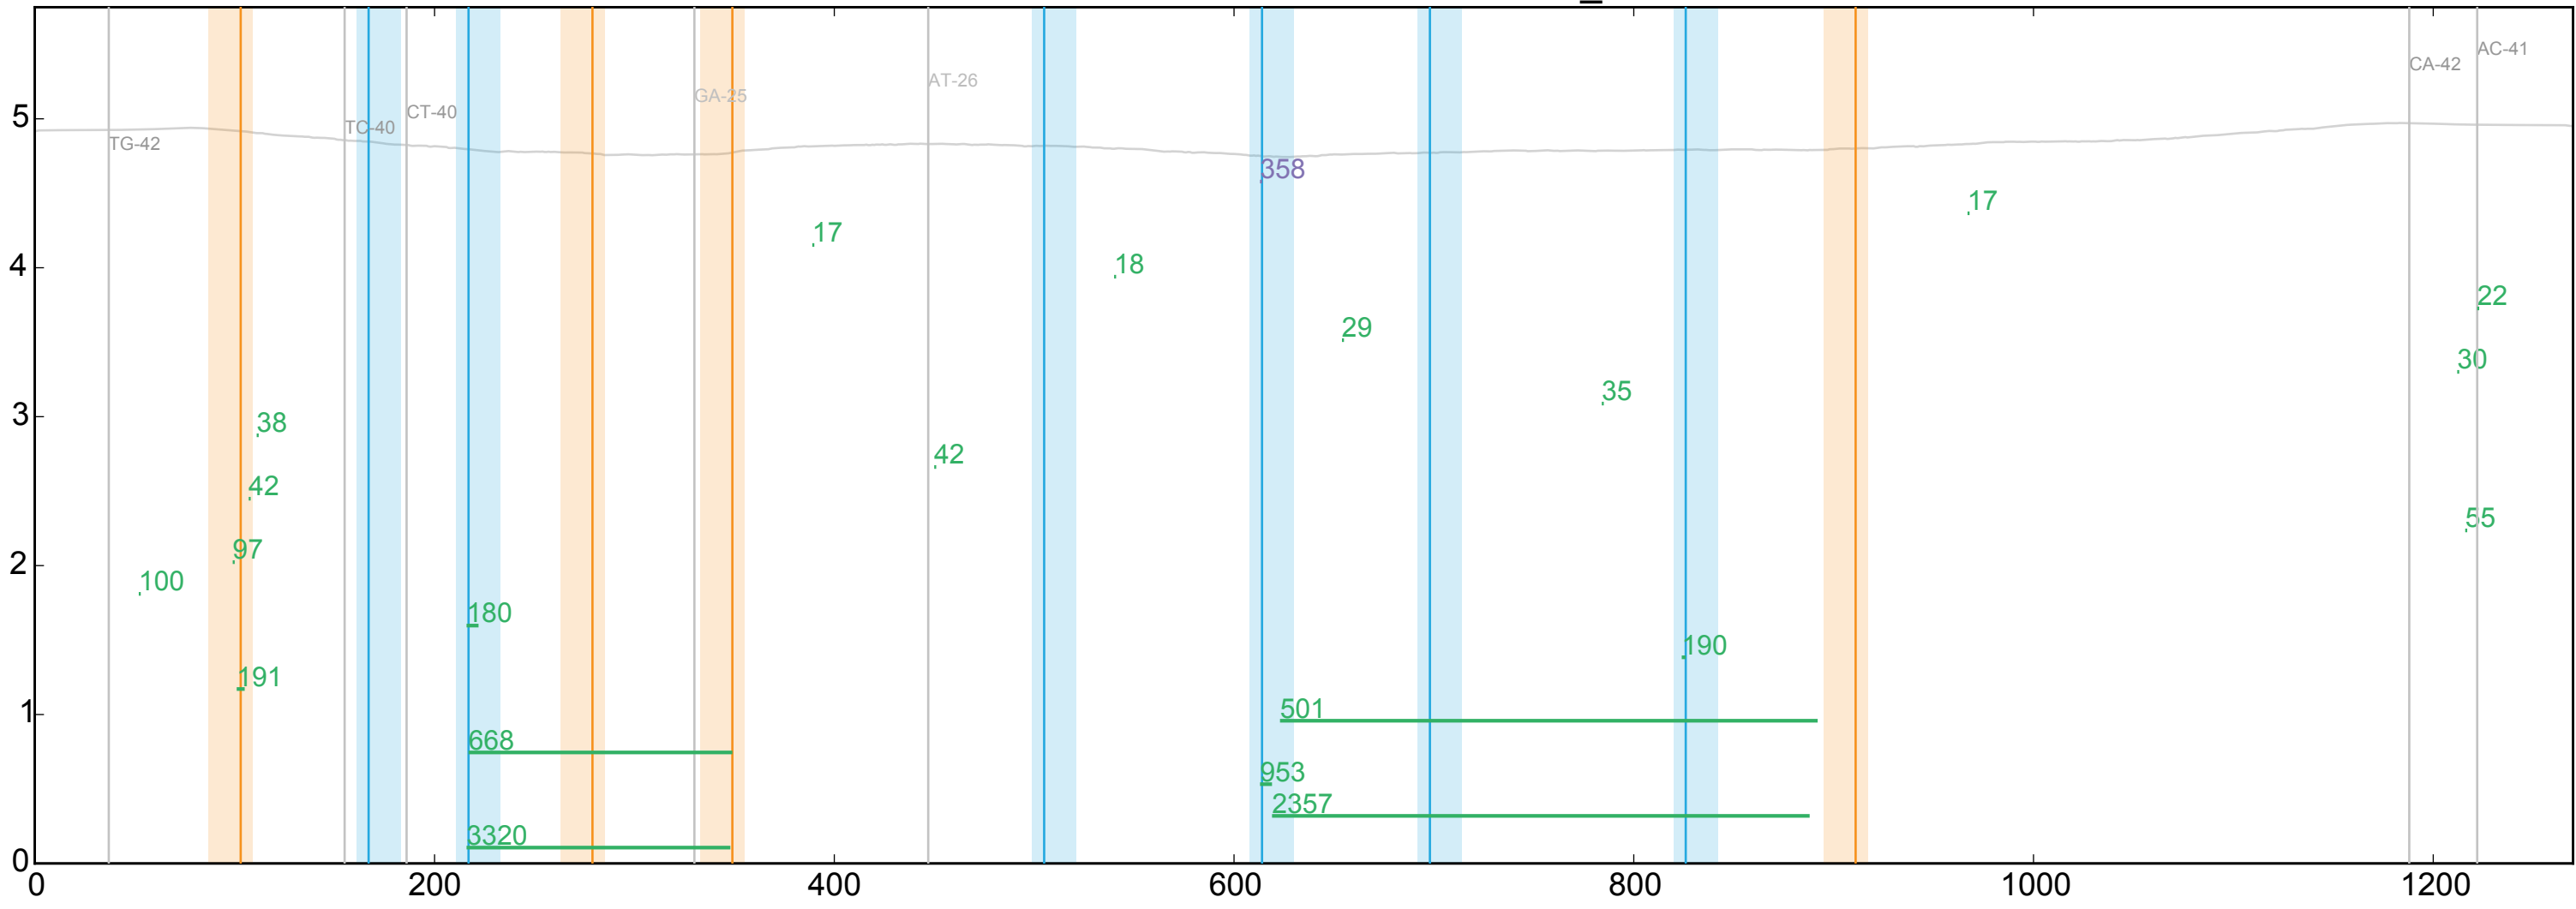

WT ENSDARG00000057582\_0

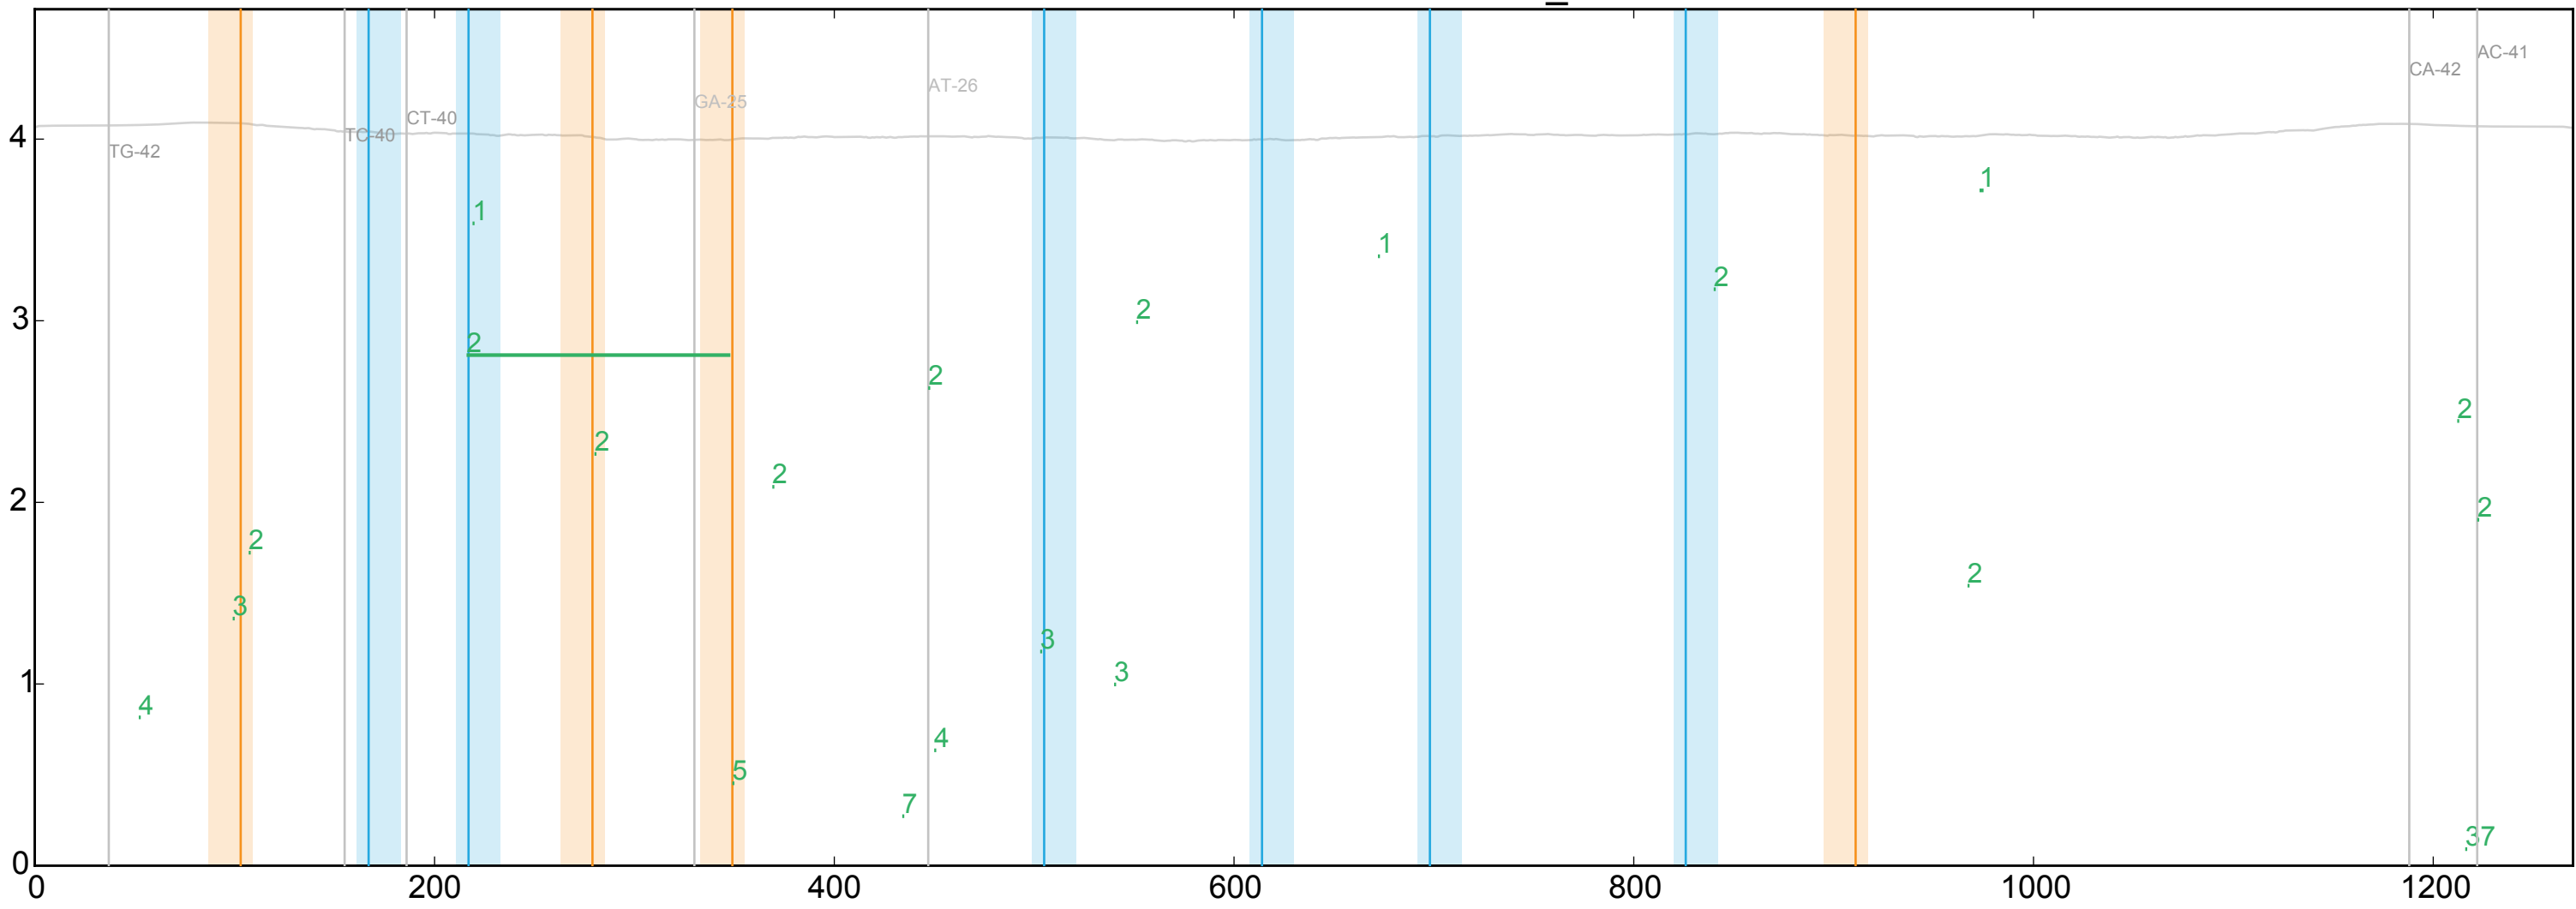

Mutant ENSDARG00000036482\_0

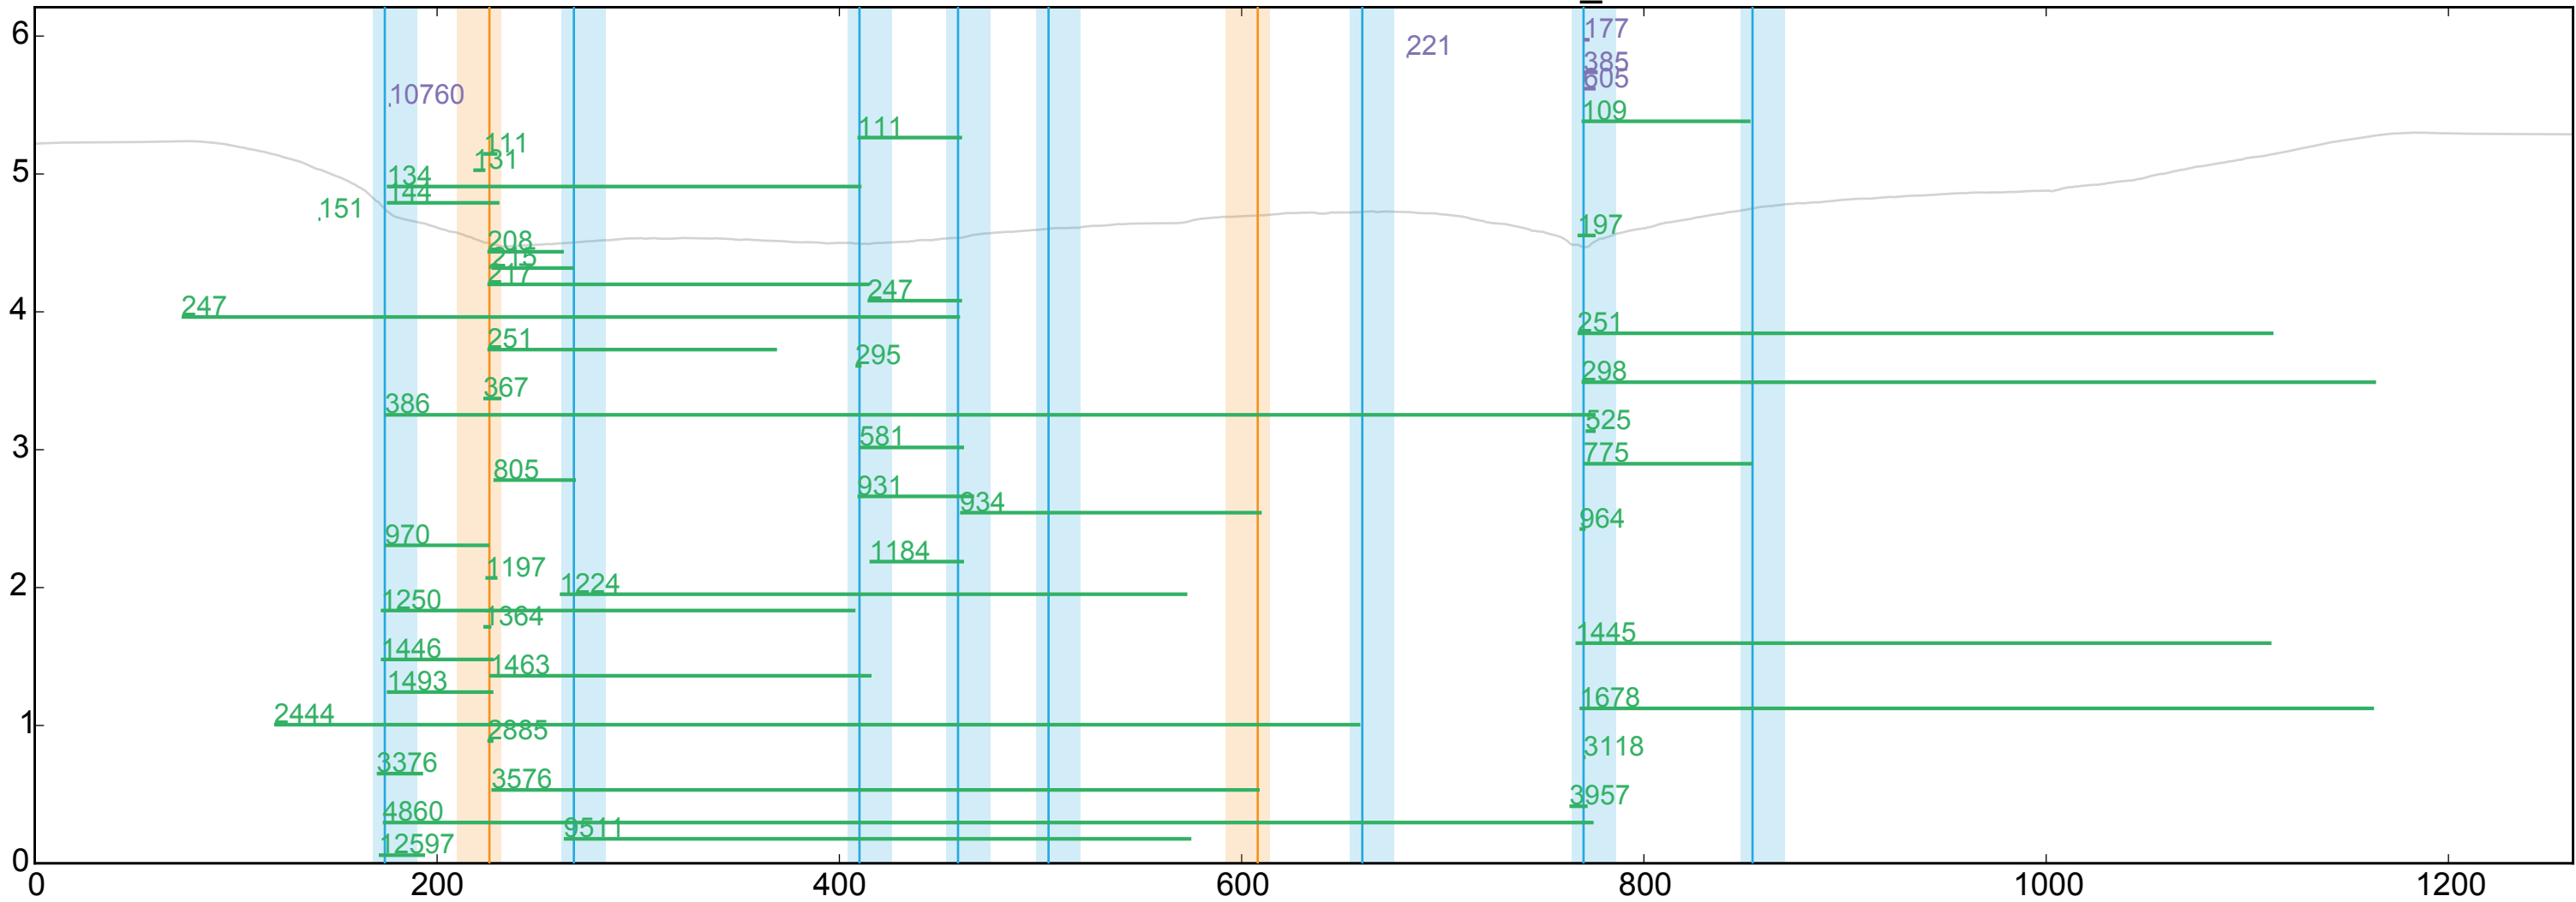

WT ENSDARG00000036482\_0

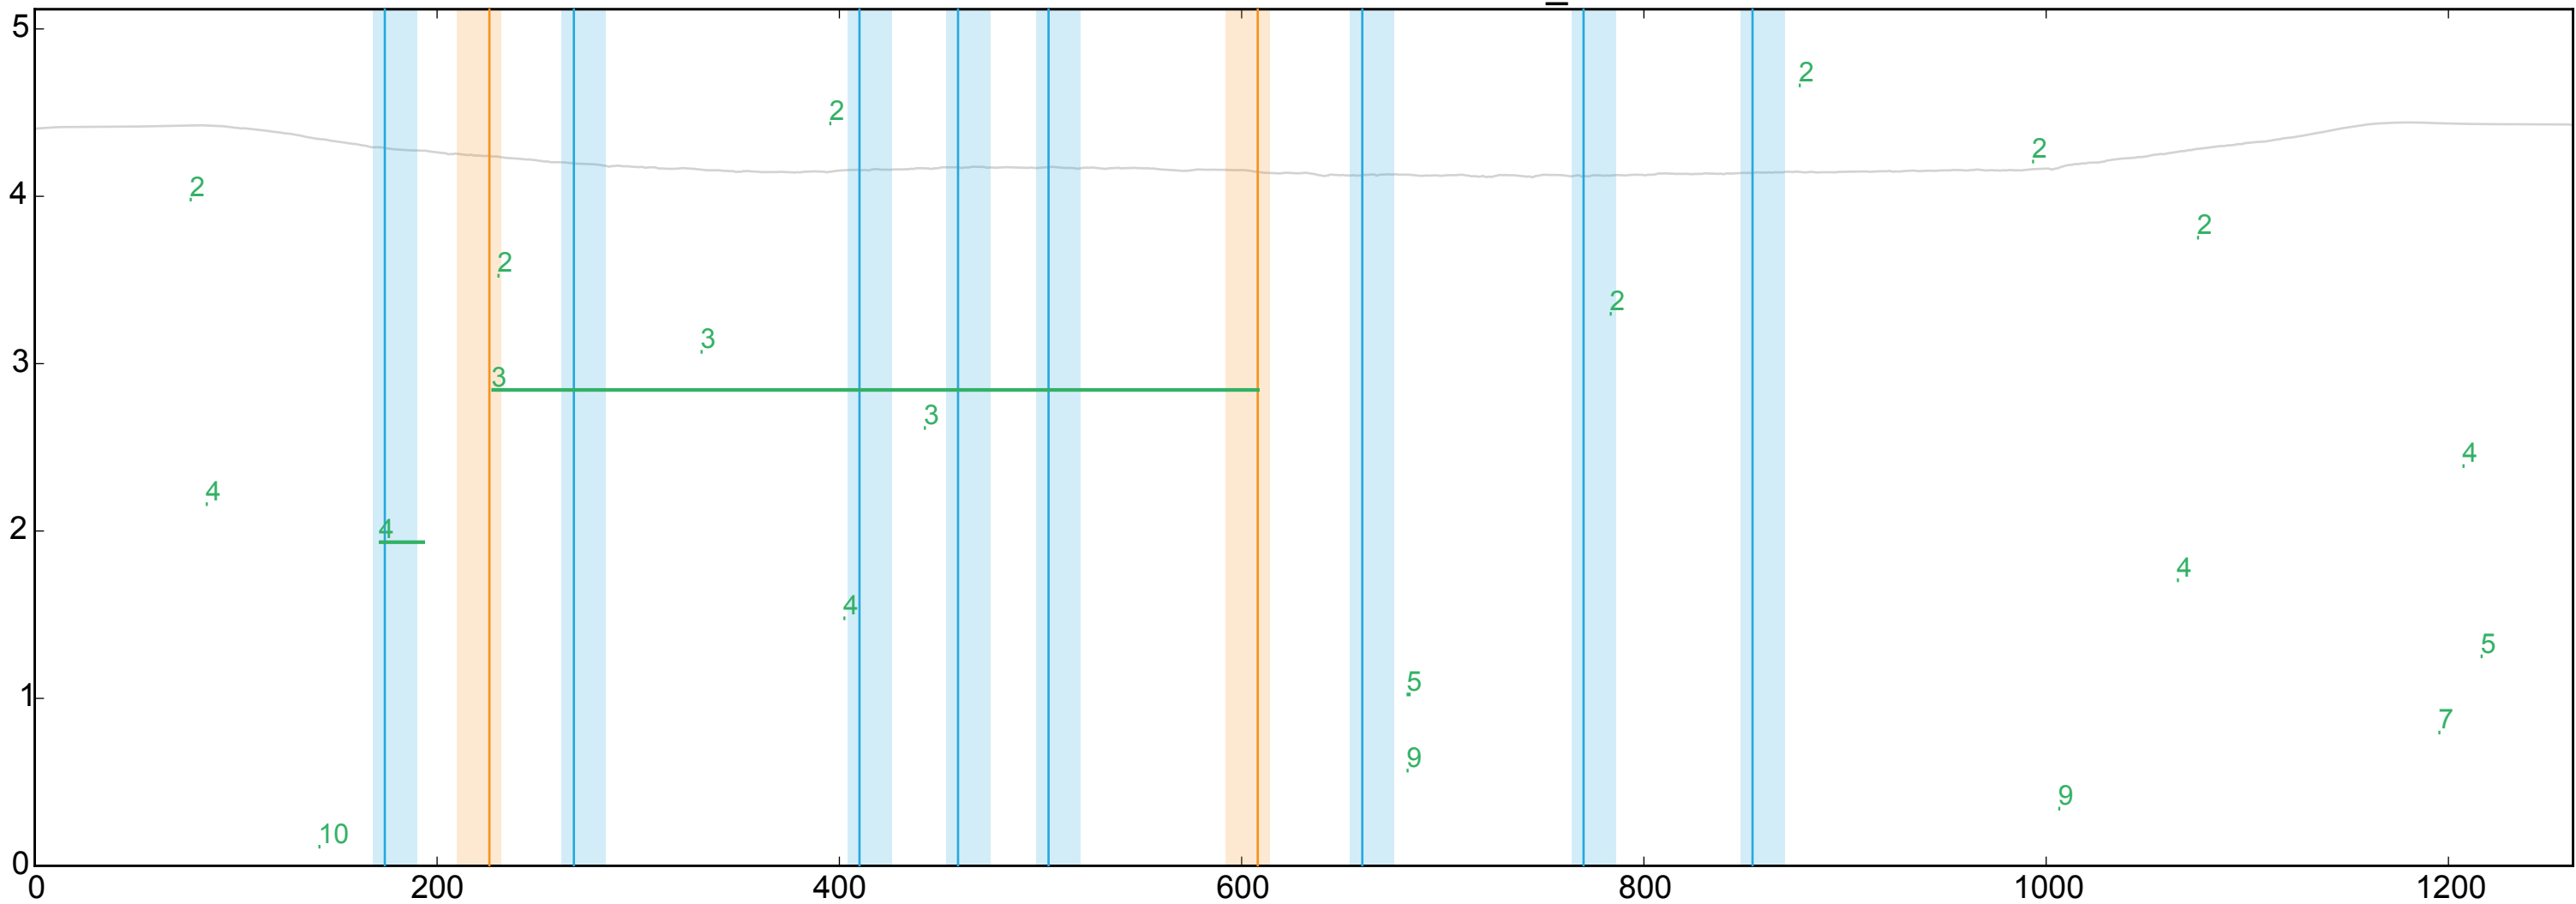



Mutant ENSDARG0000001244\_13

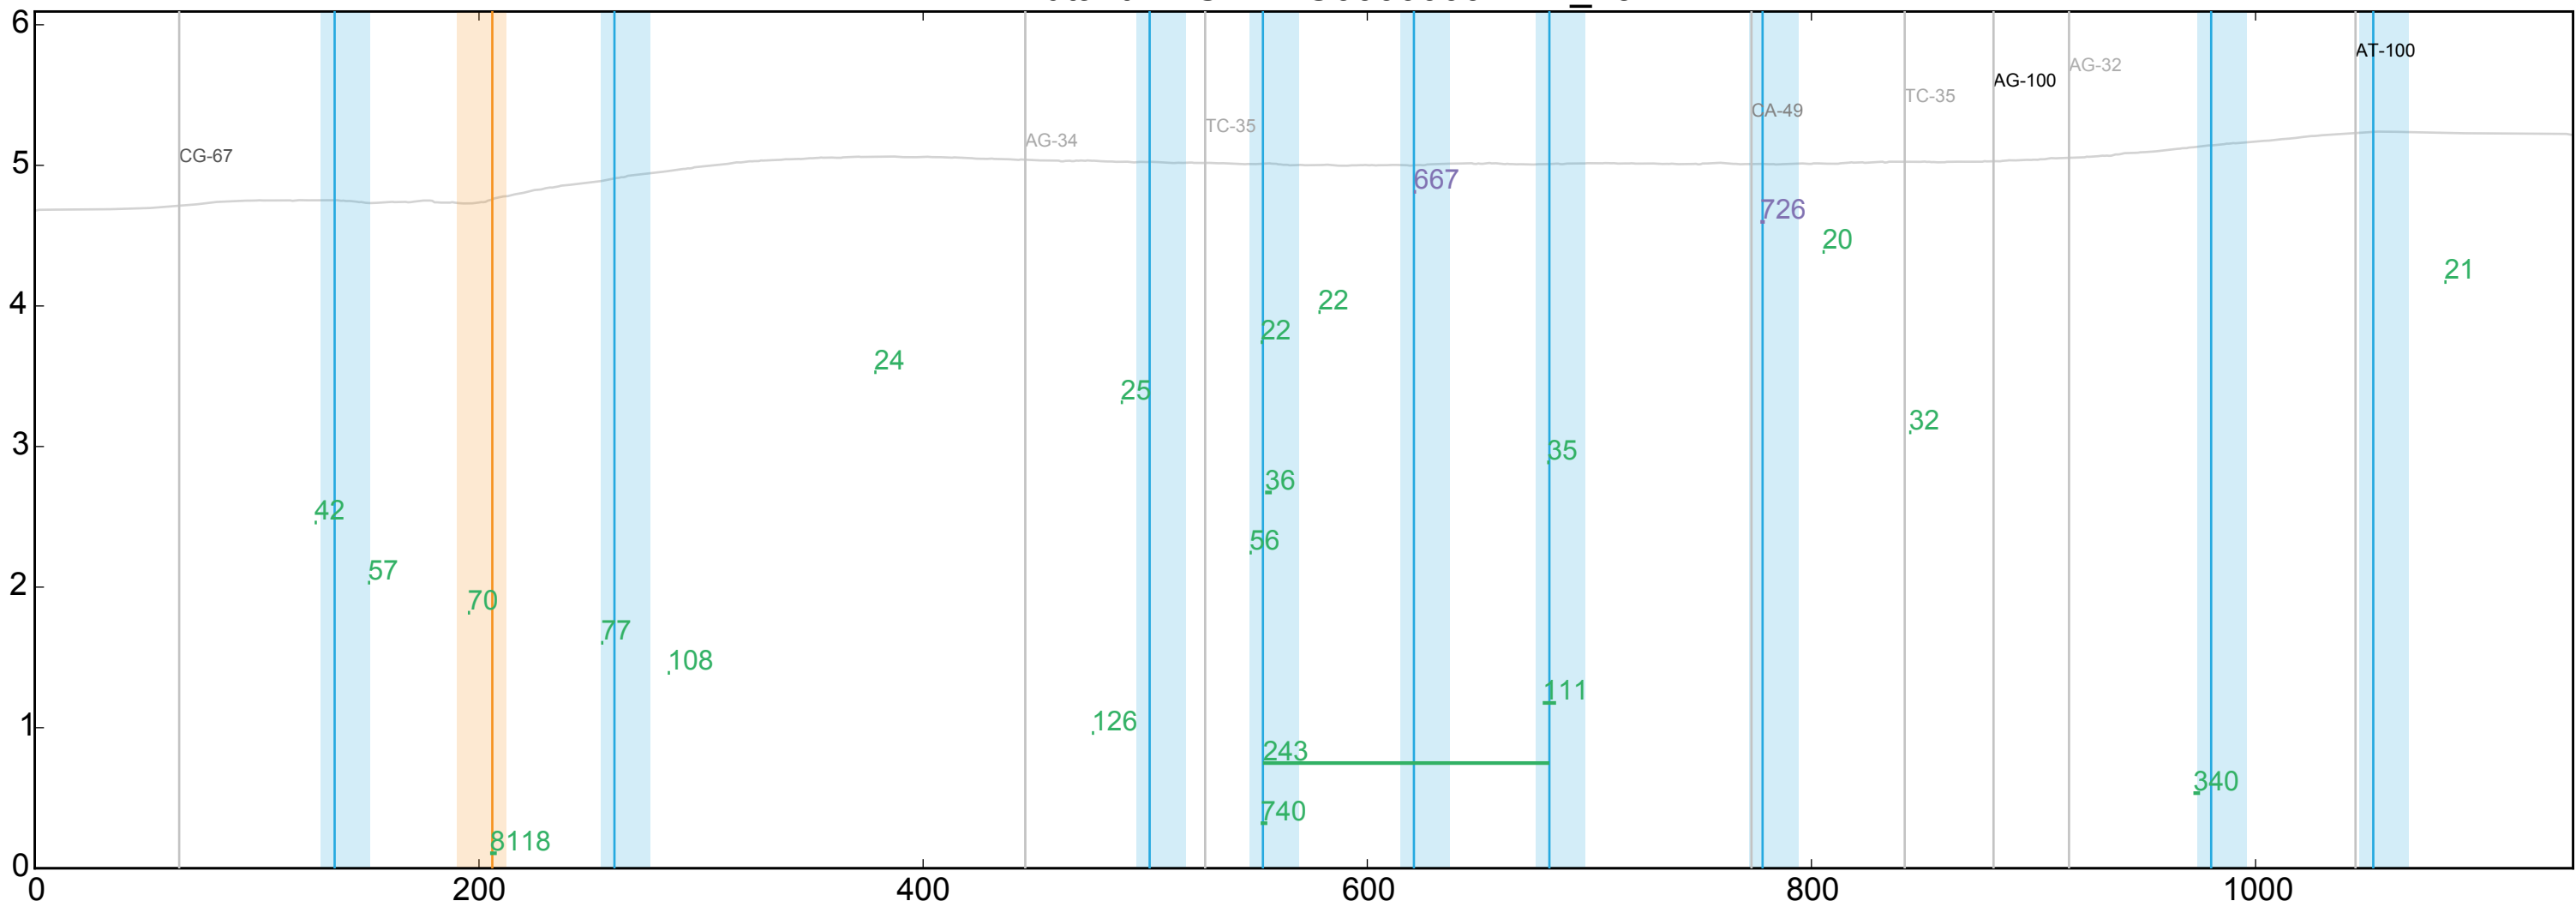

WT ENSDARG0000001244\_13

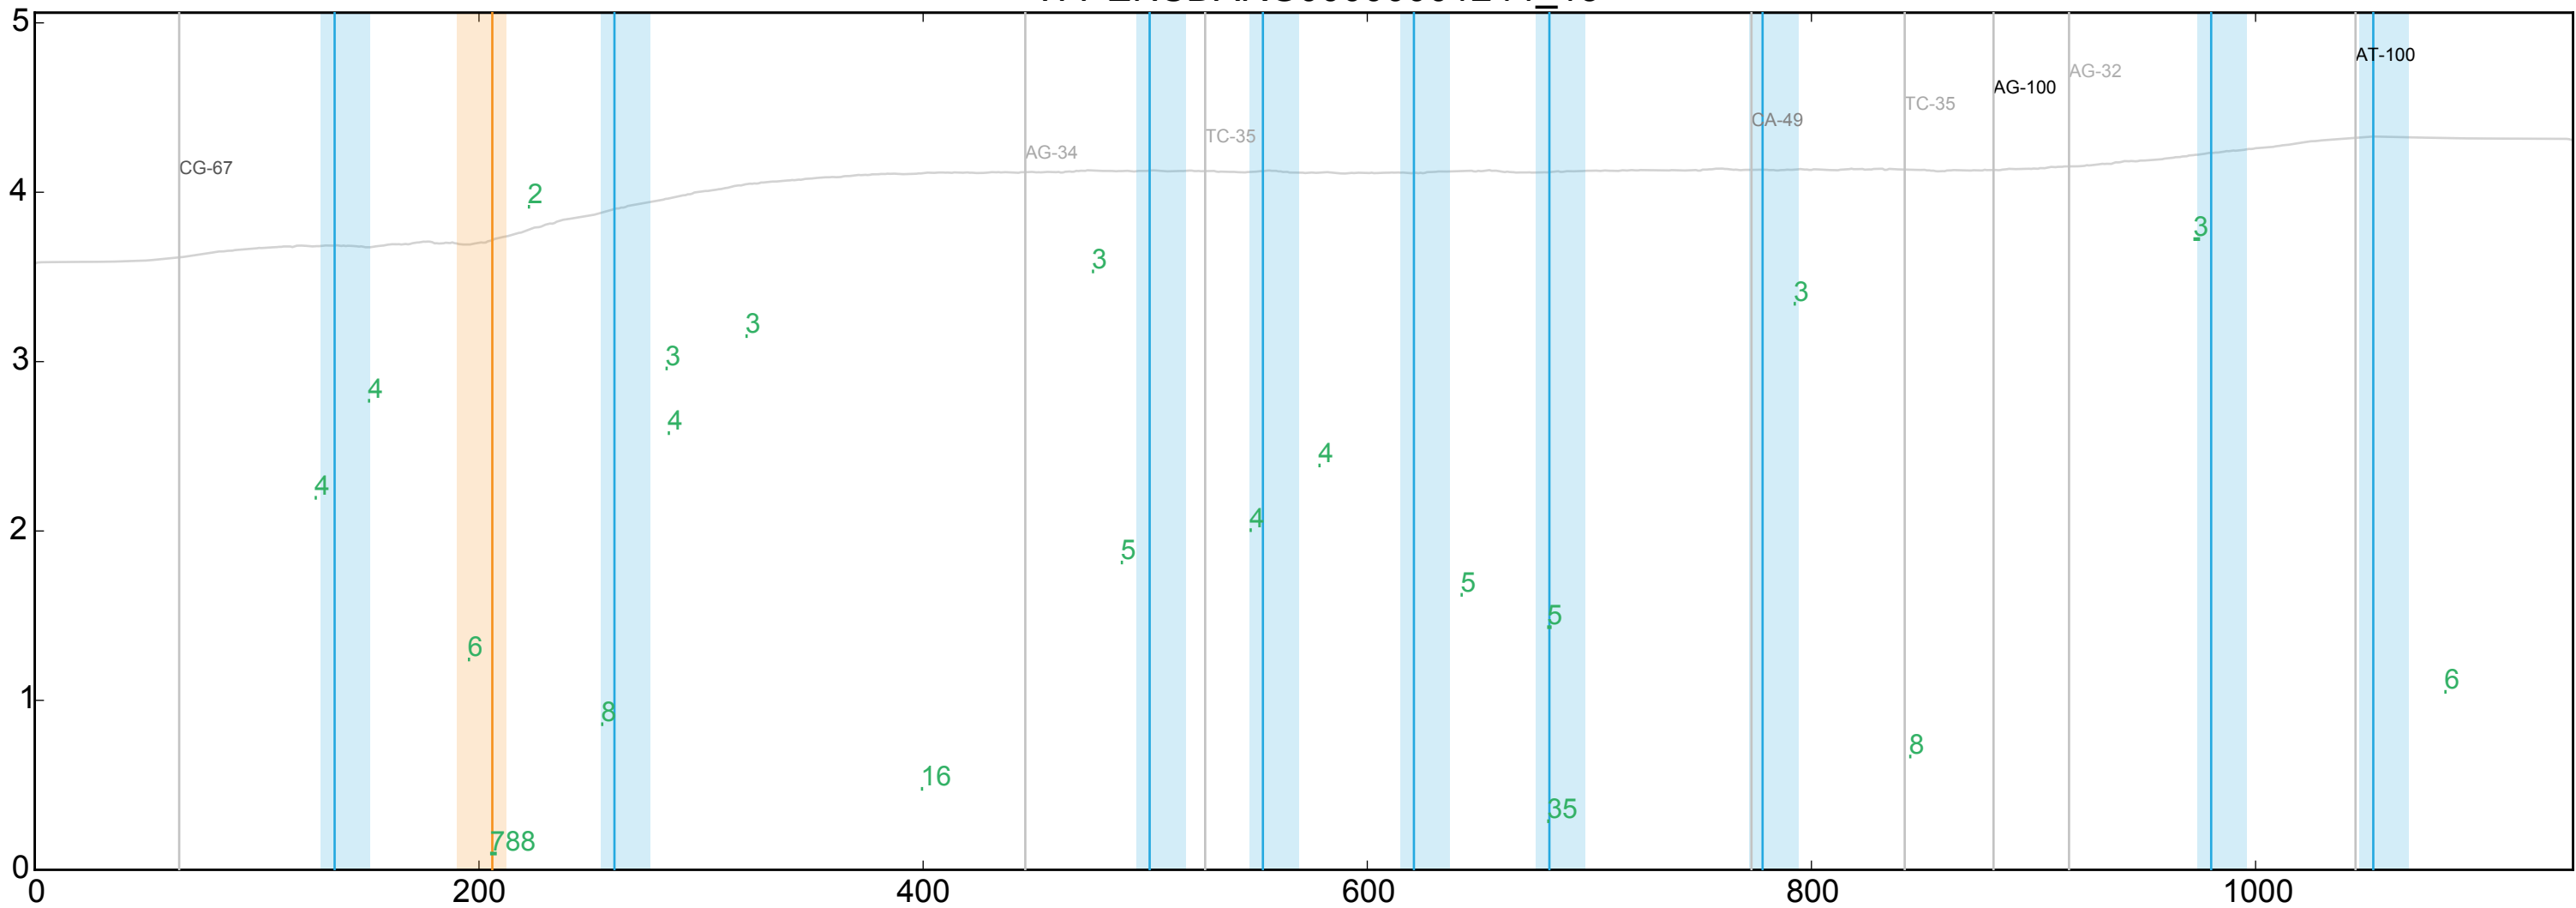

Mutant ENSDARG00000063417\_0

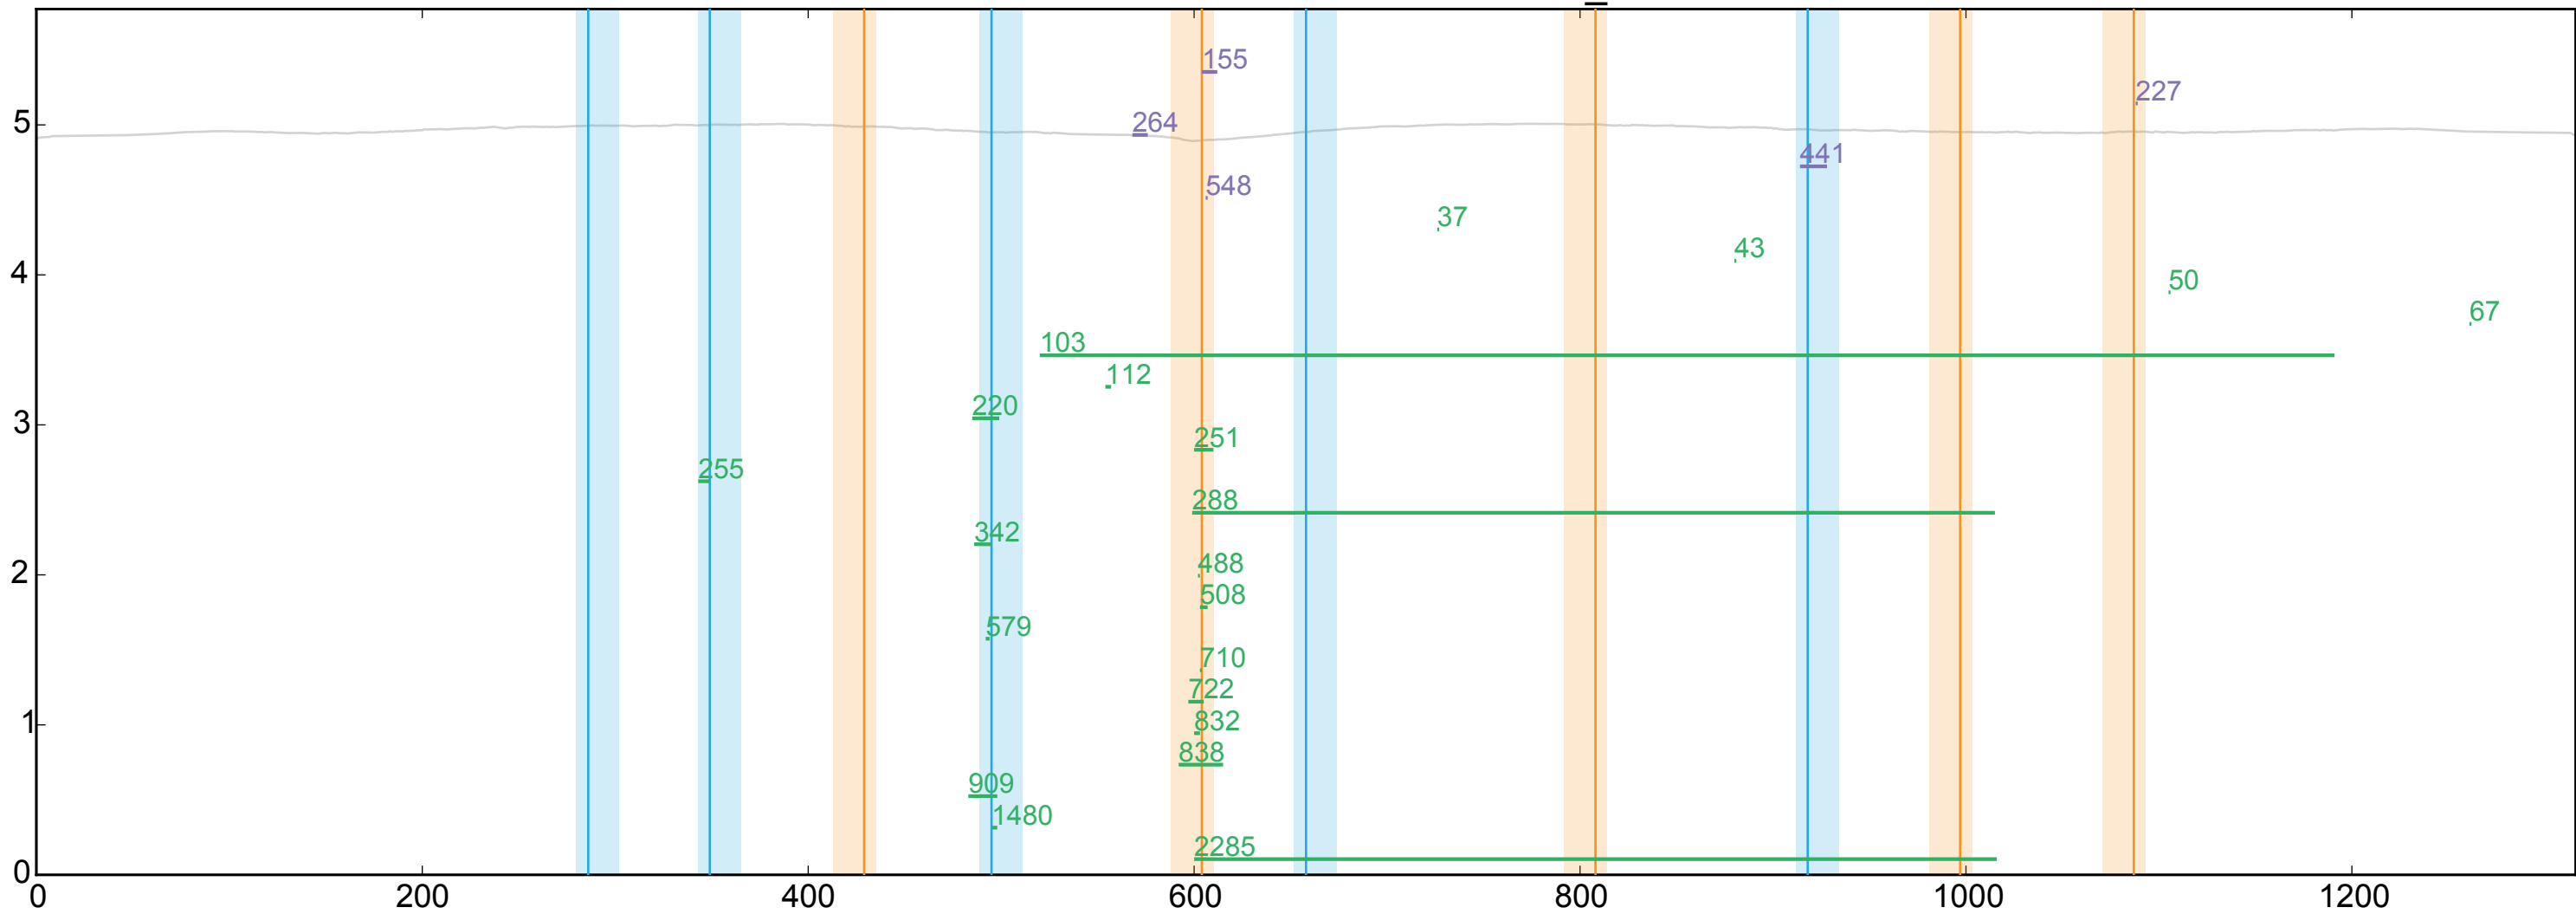

WT ENSDARG00000063417\_0

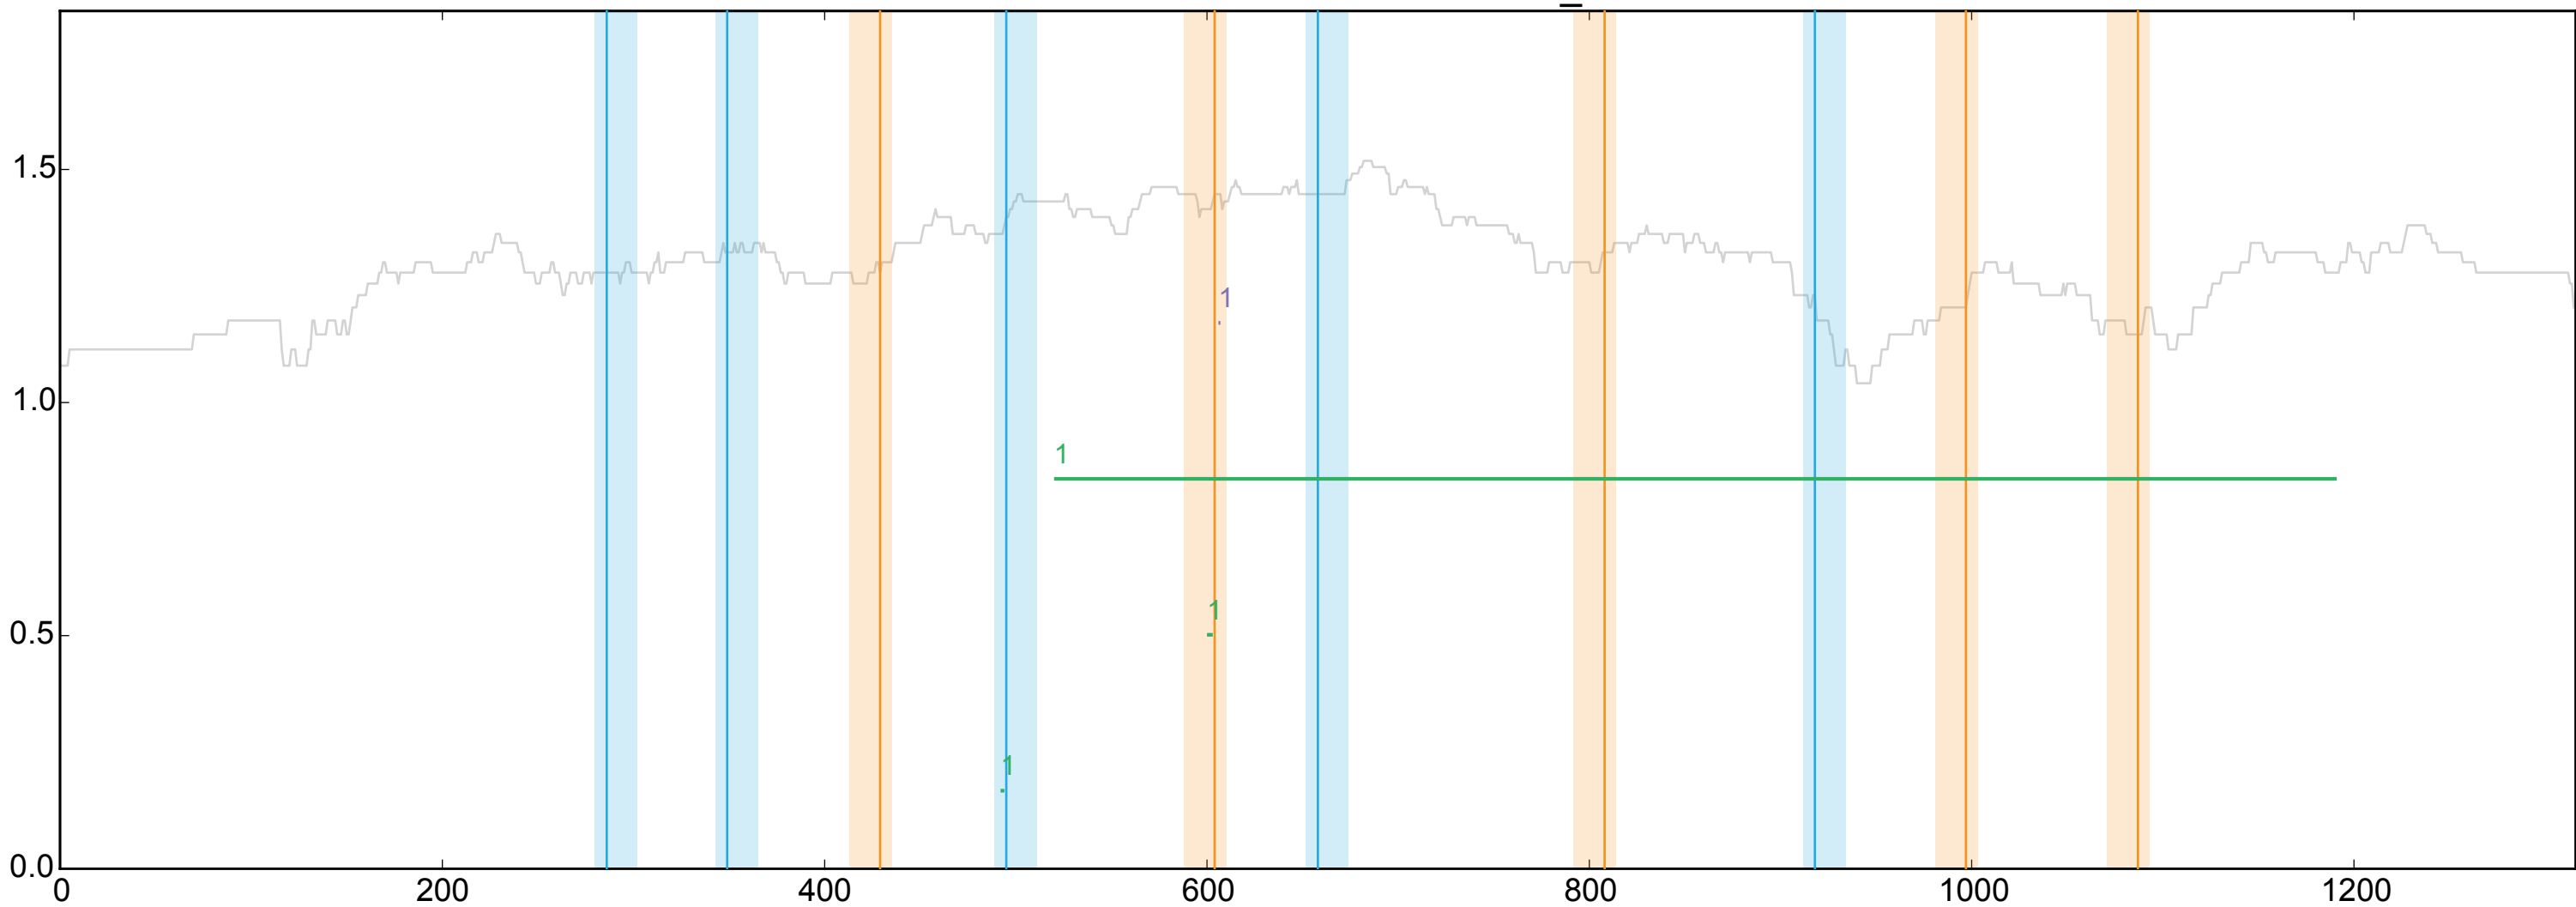

Mutant ENSDARG0000091127\_1

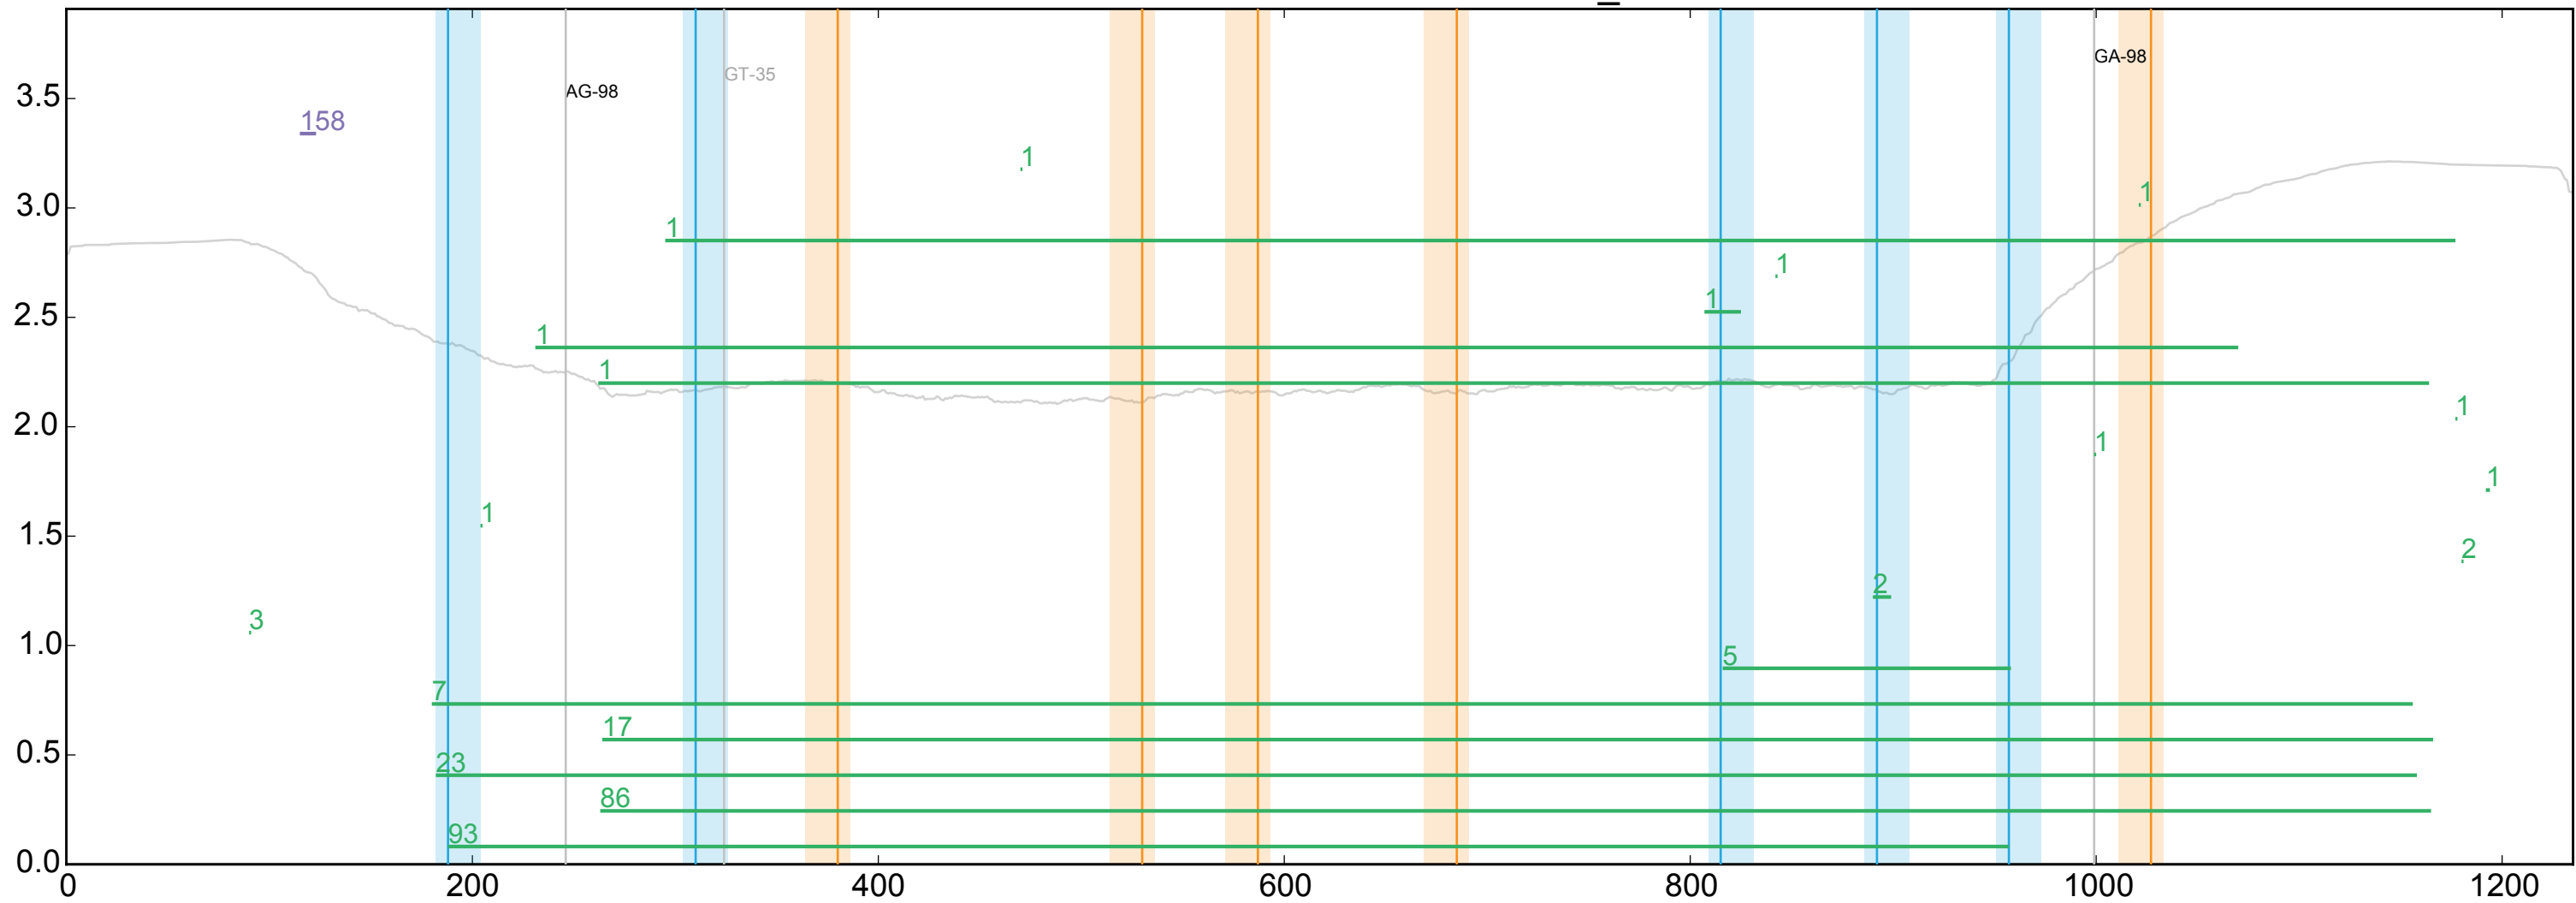

WT ENSDARG0000091127\_1

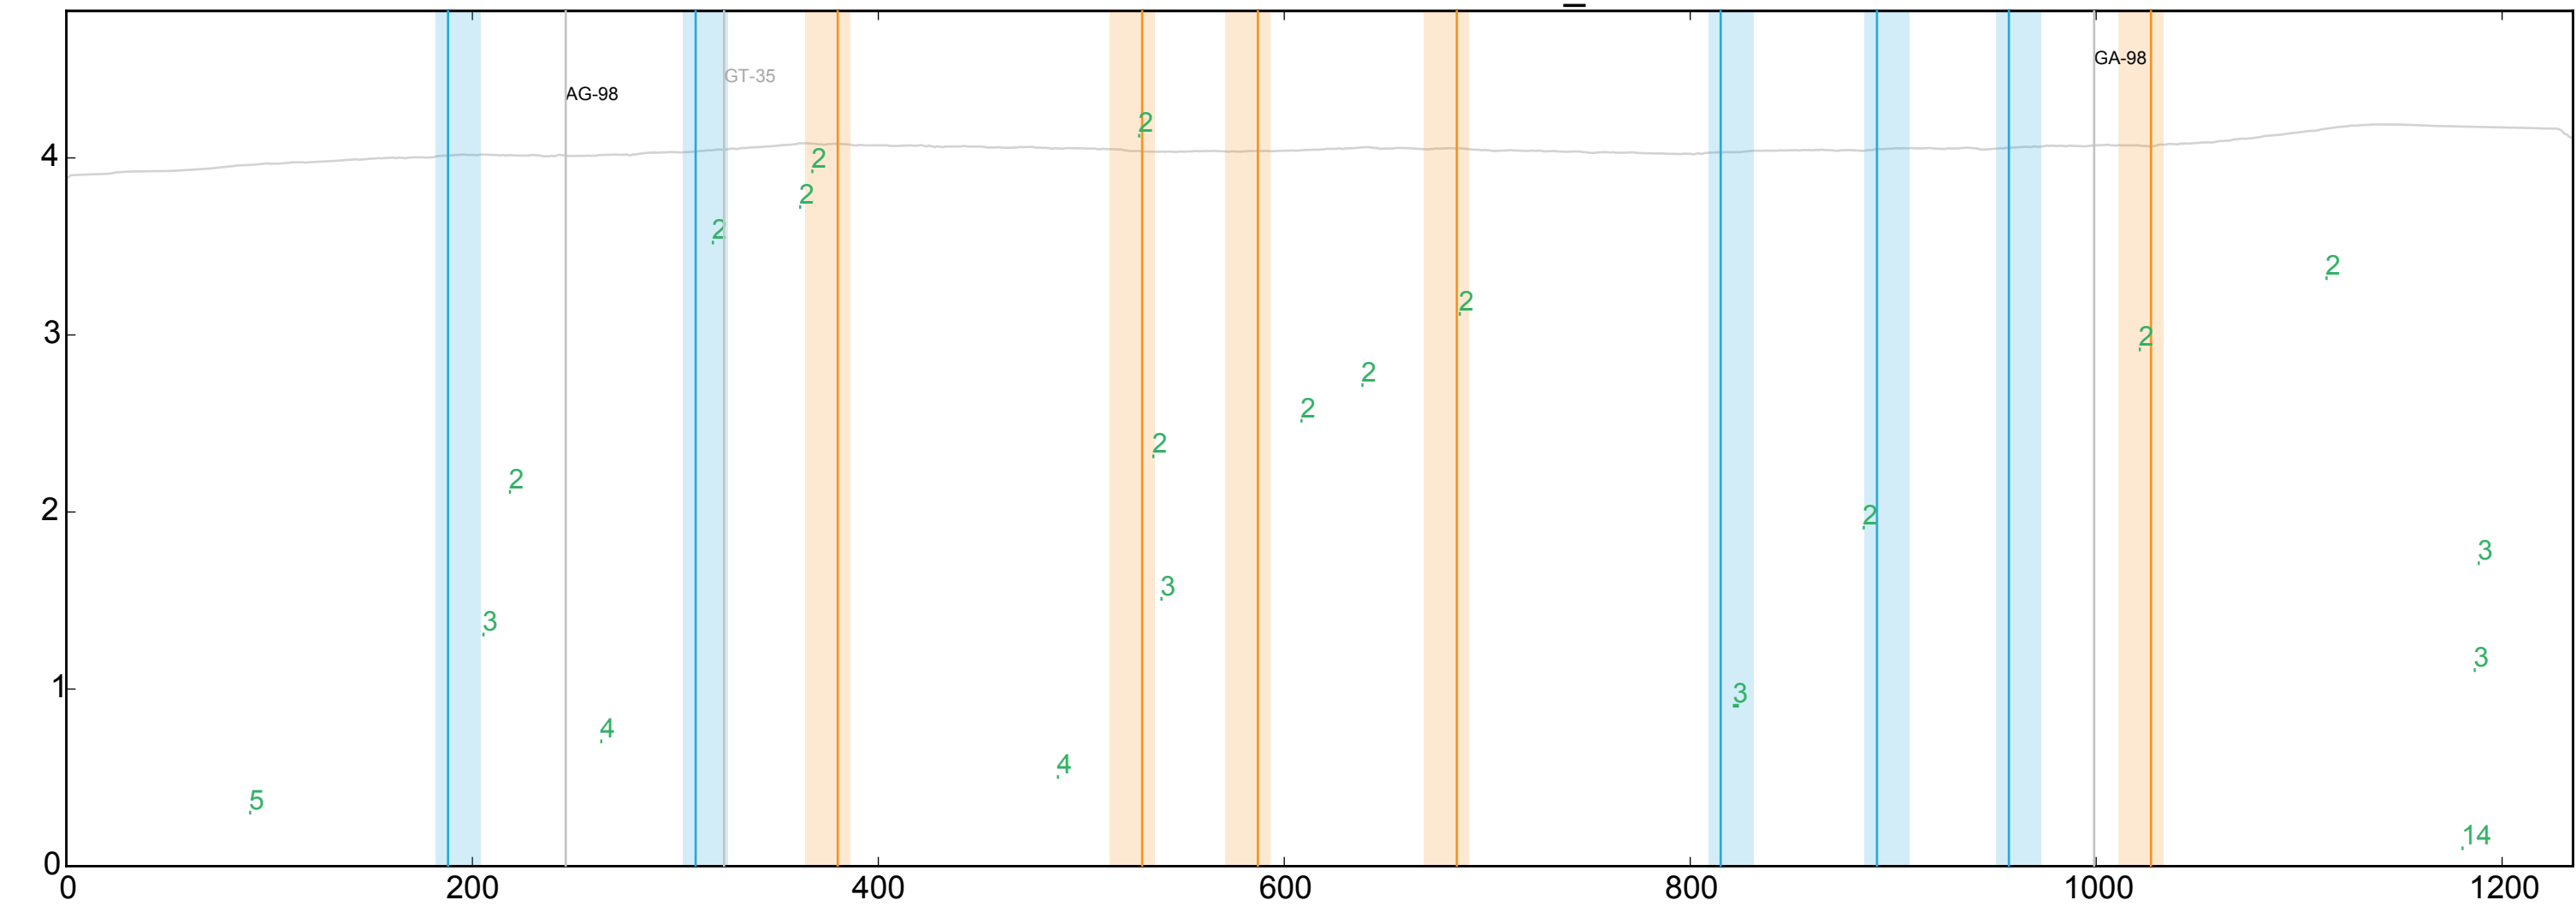

Mutant ENSDARG00000035563\_0

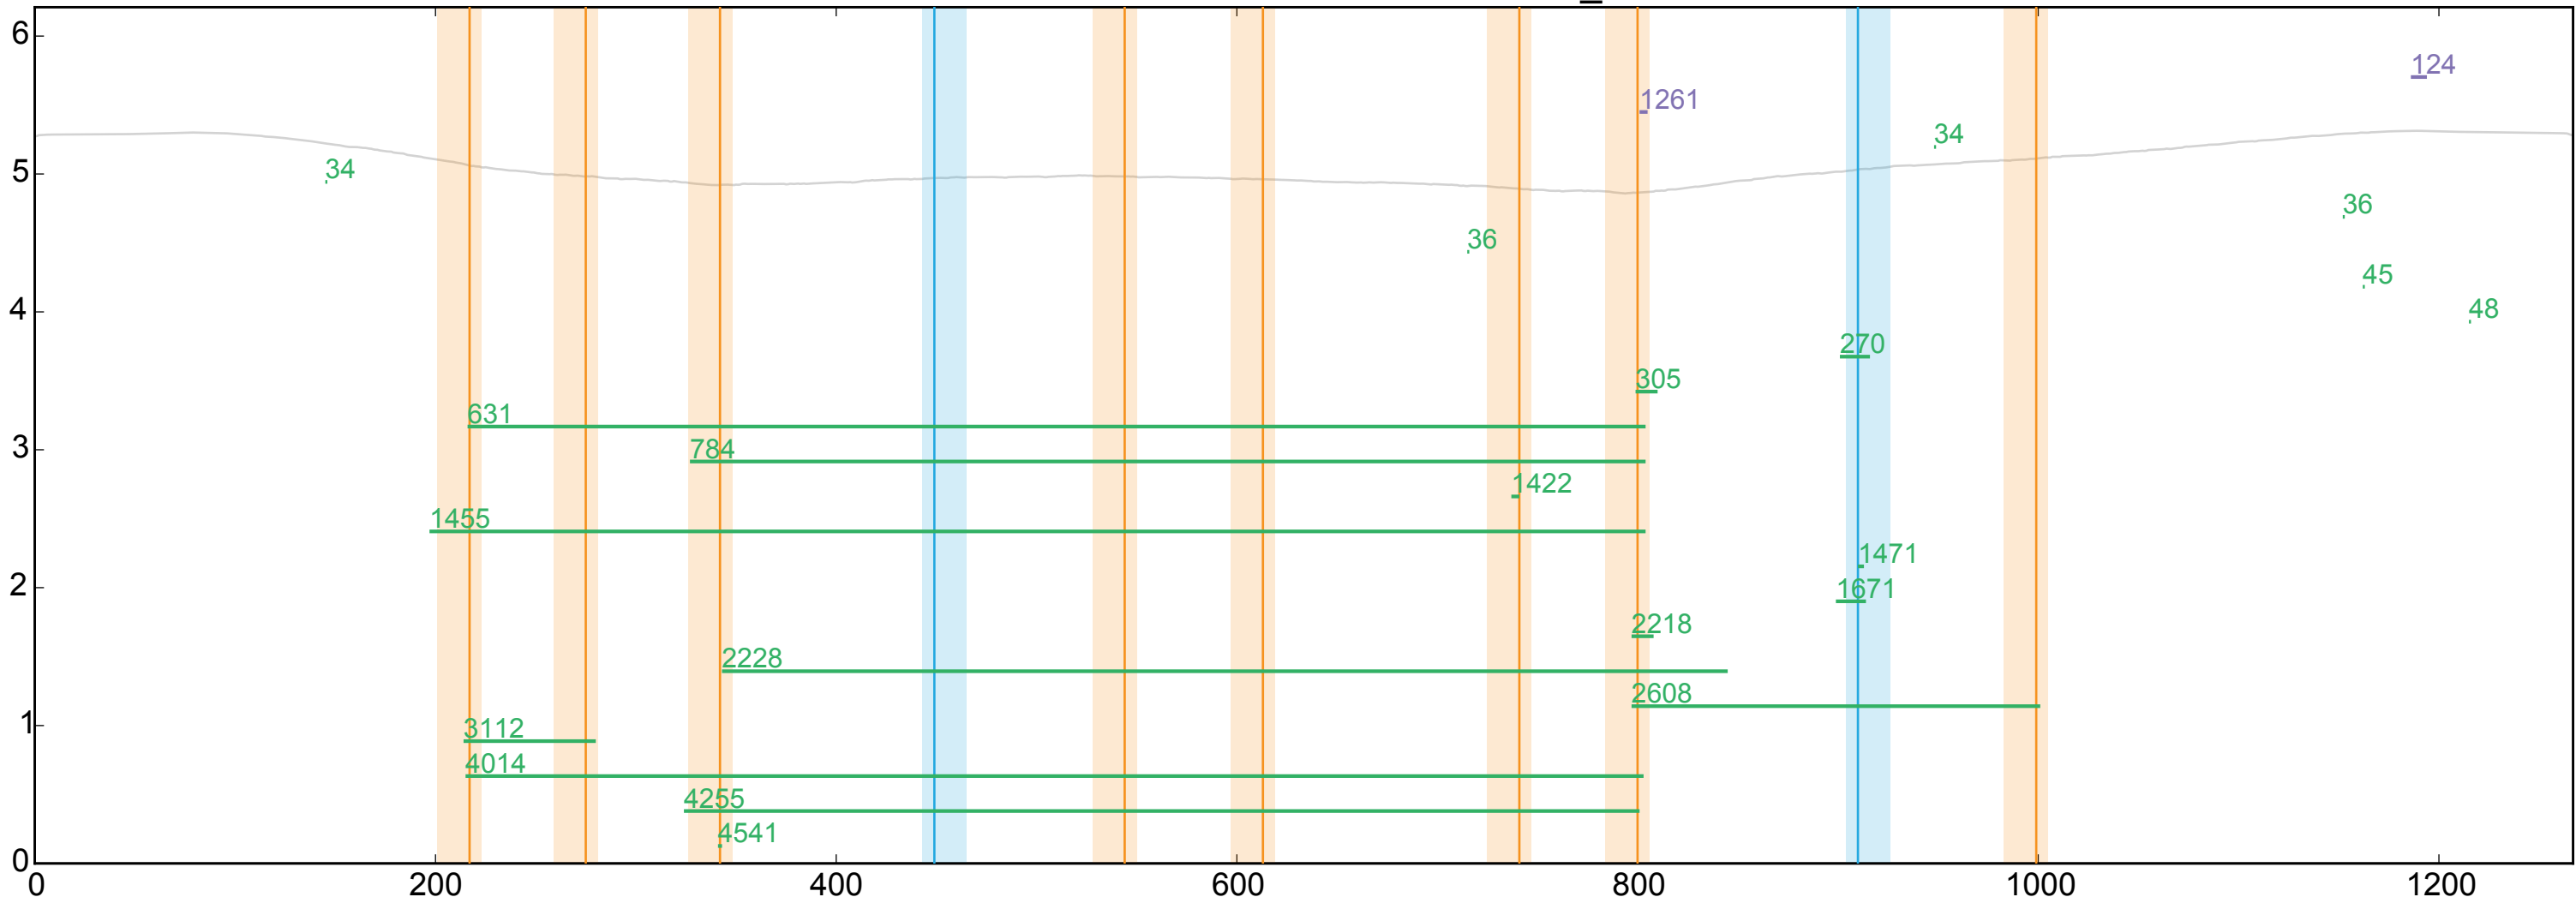

WT ENSDARG00000035563\_0

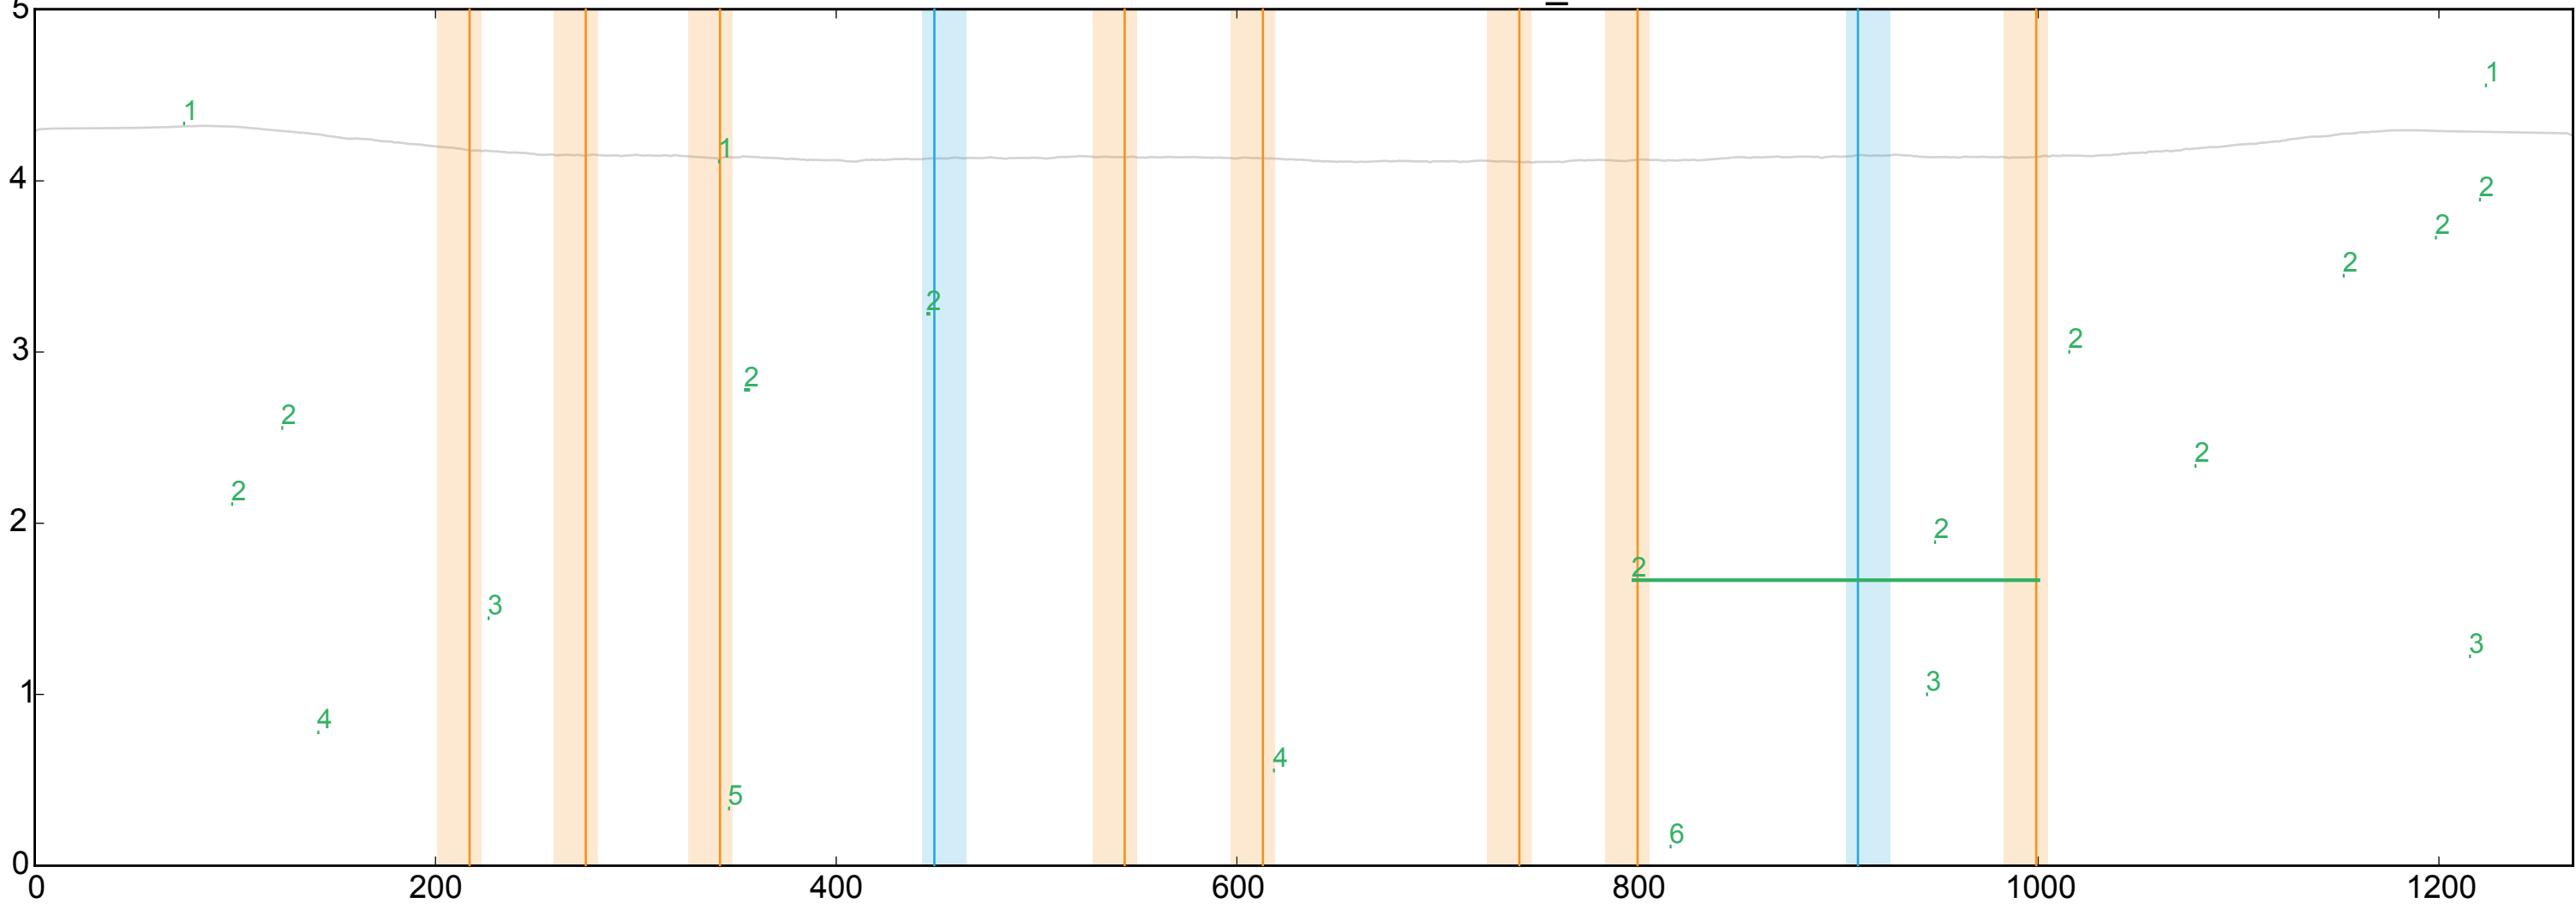



Mutant ENSDARG00000076638\_0

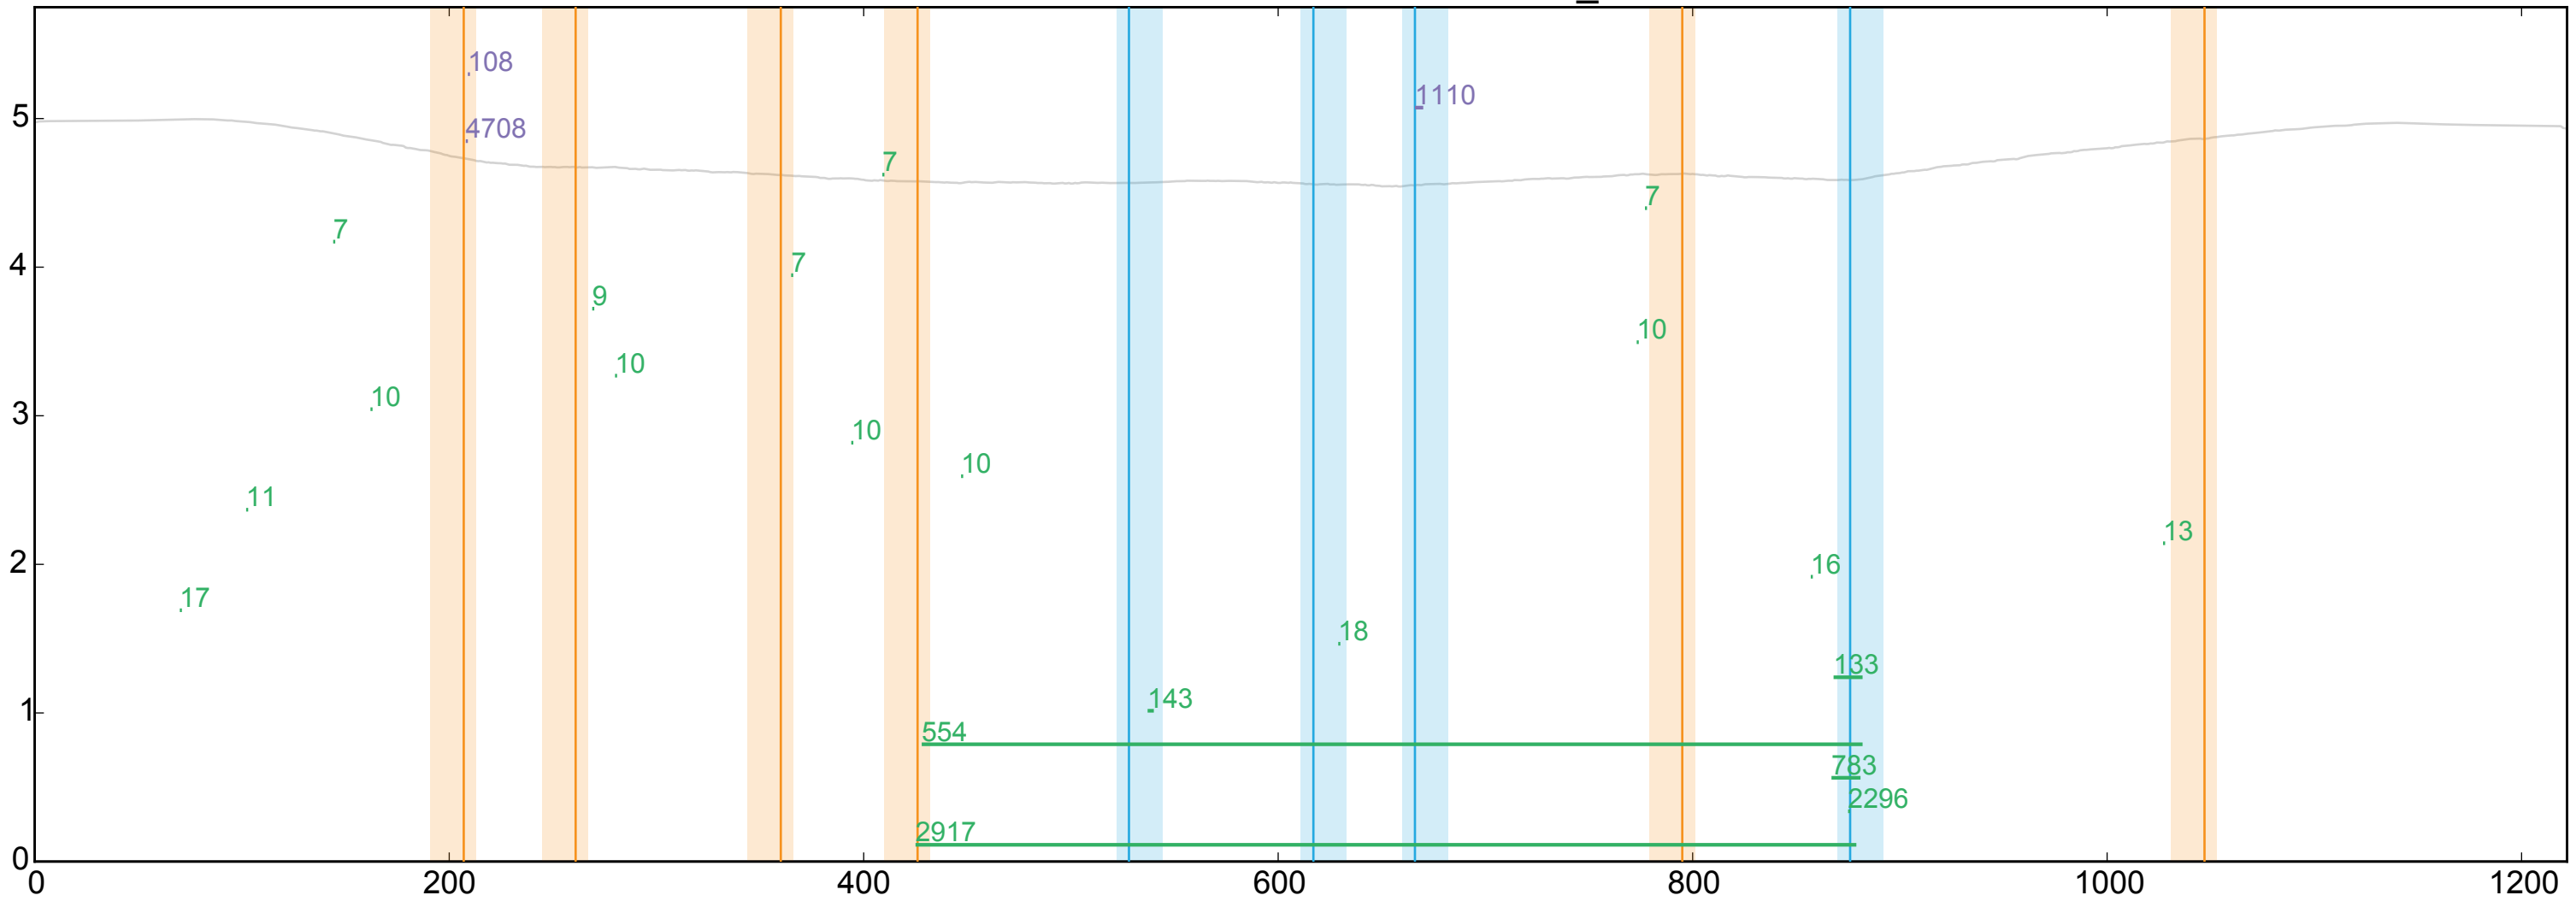

WT ENSDARG00000076638\_0

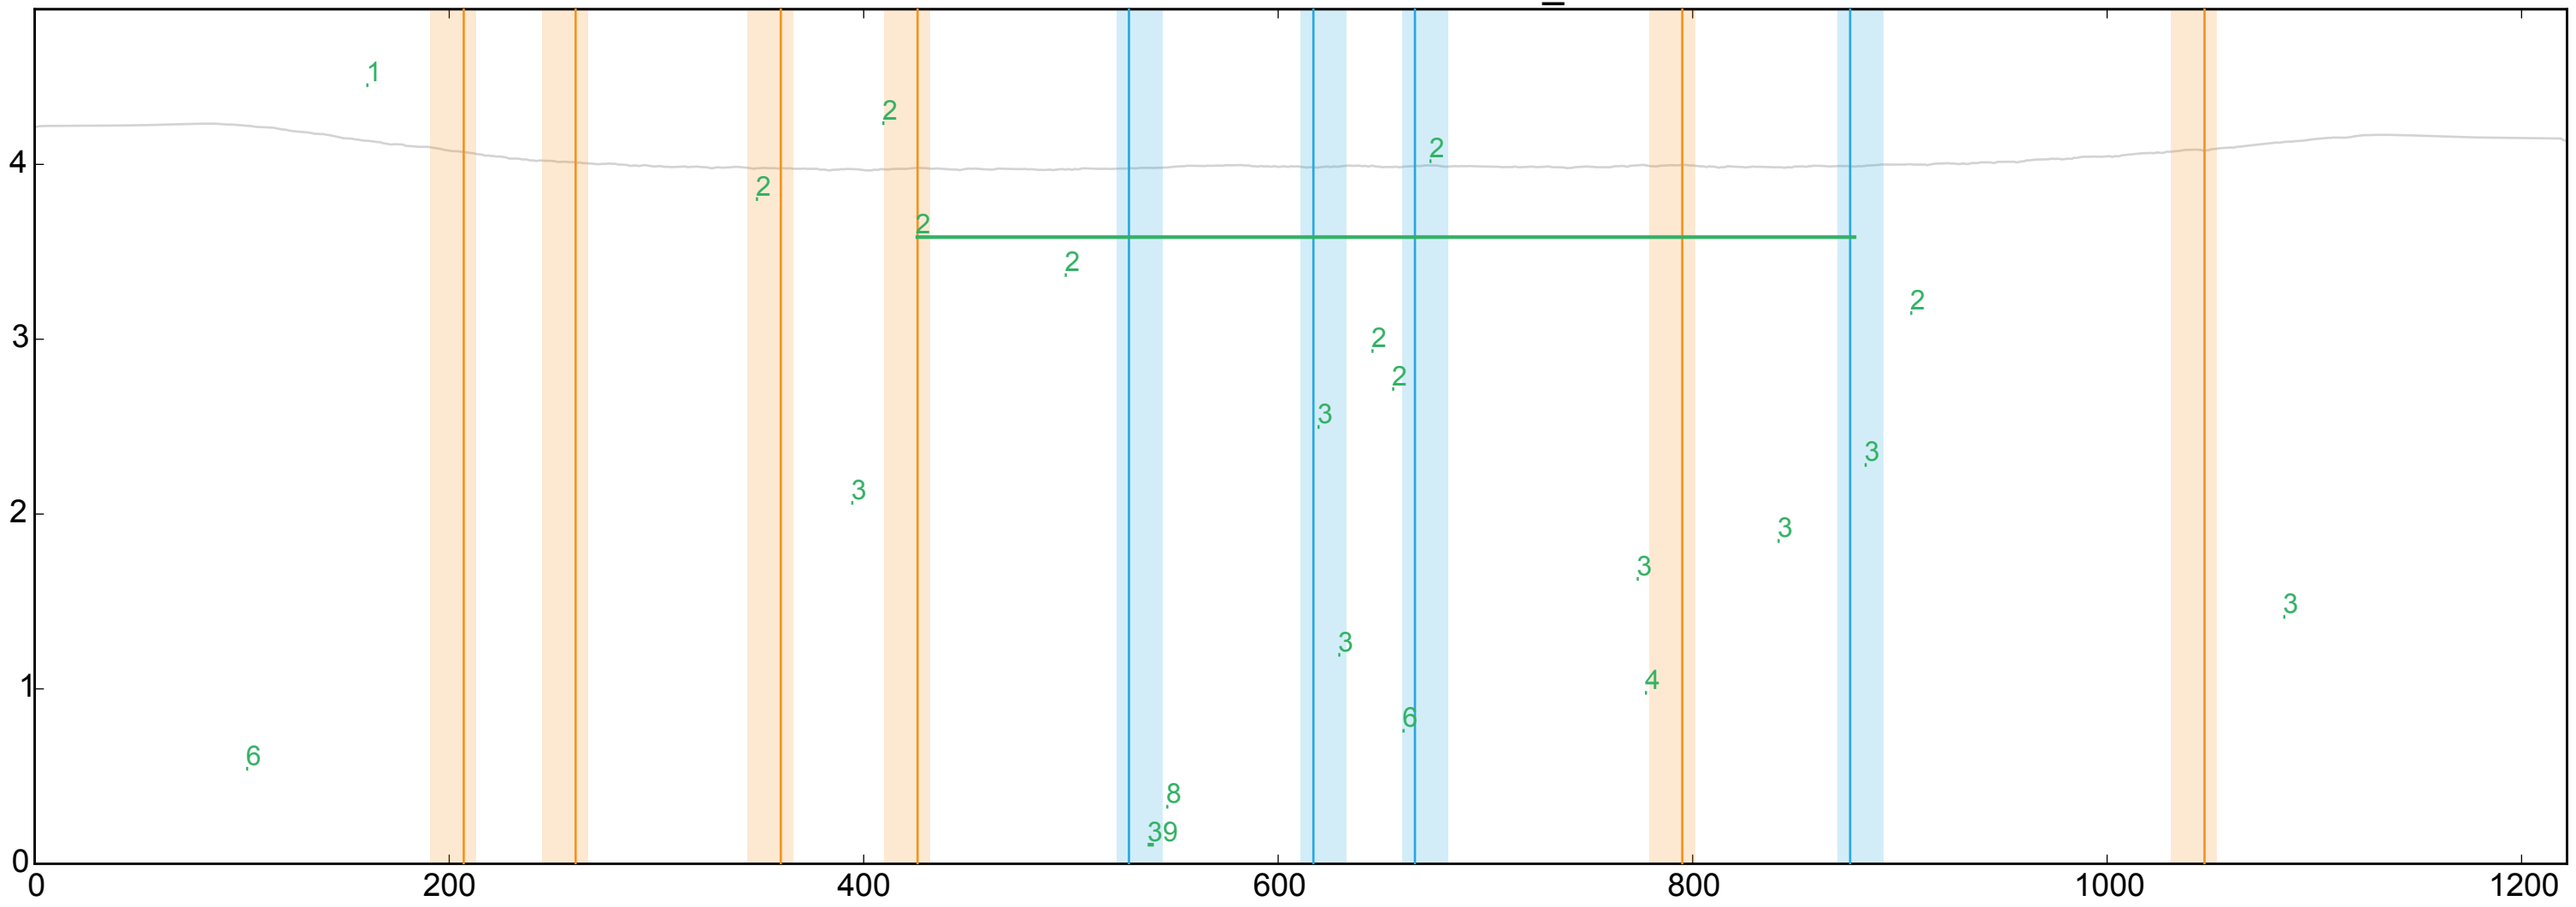

Mutant ENSDARG00000078355\_0

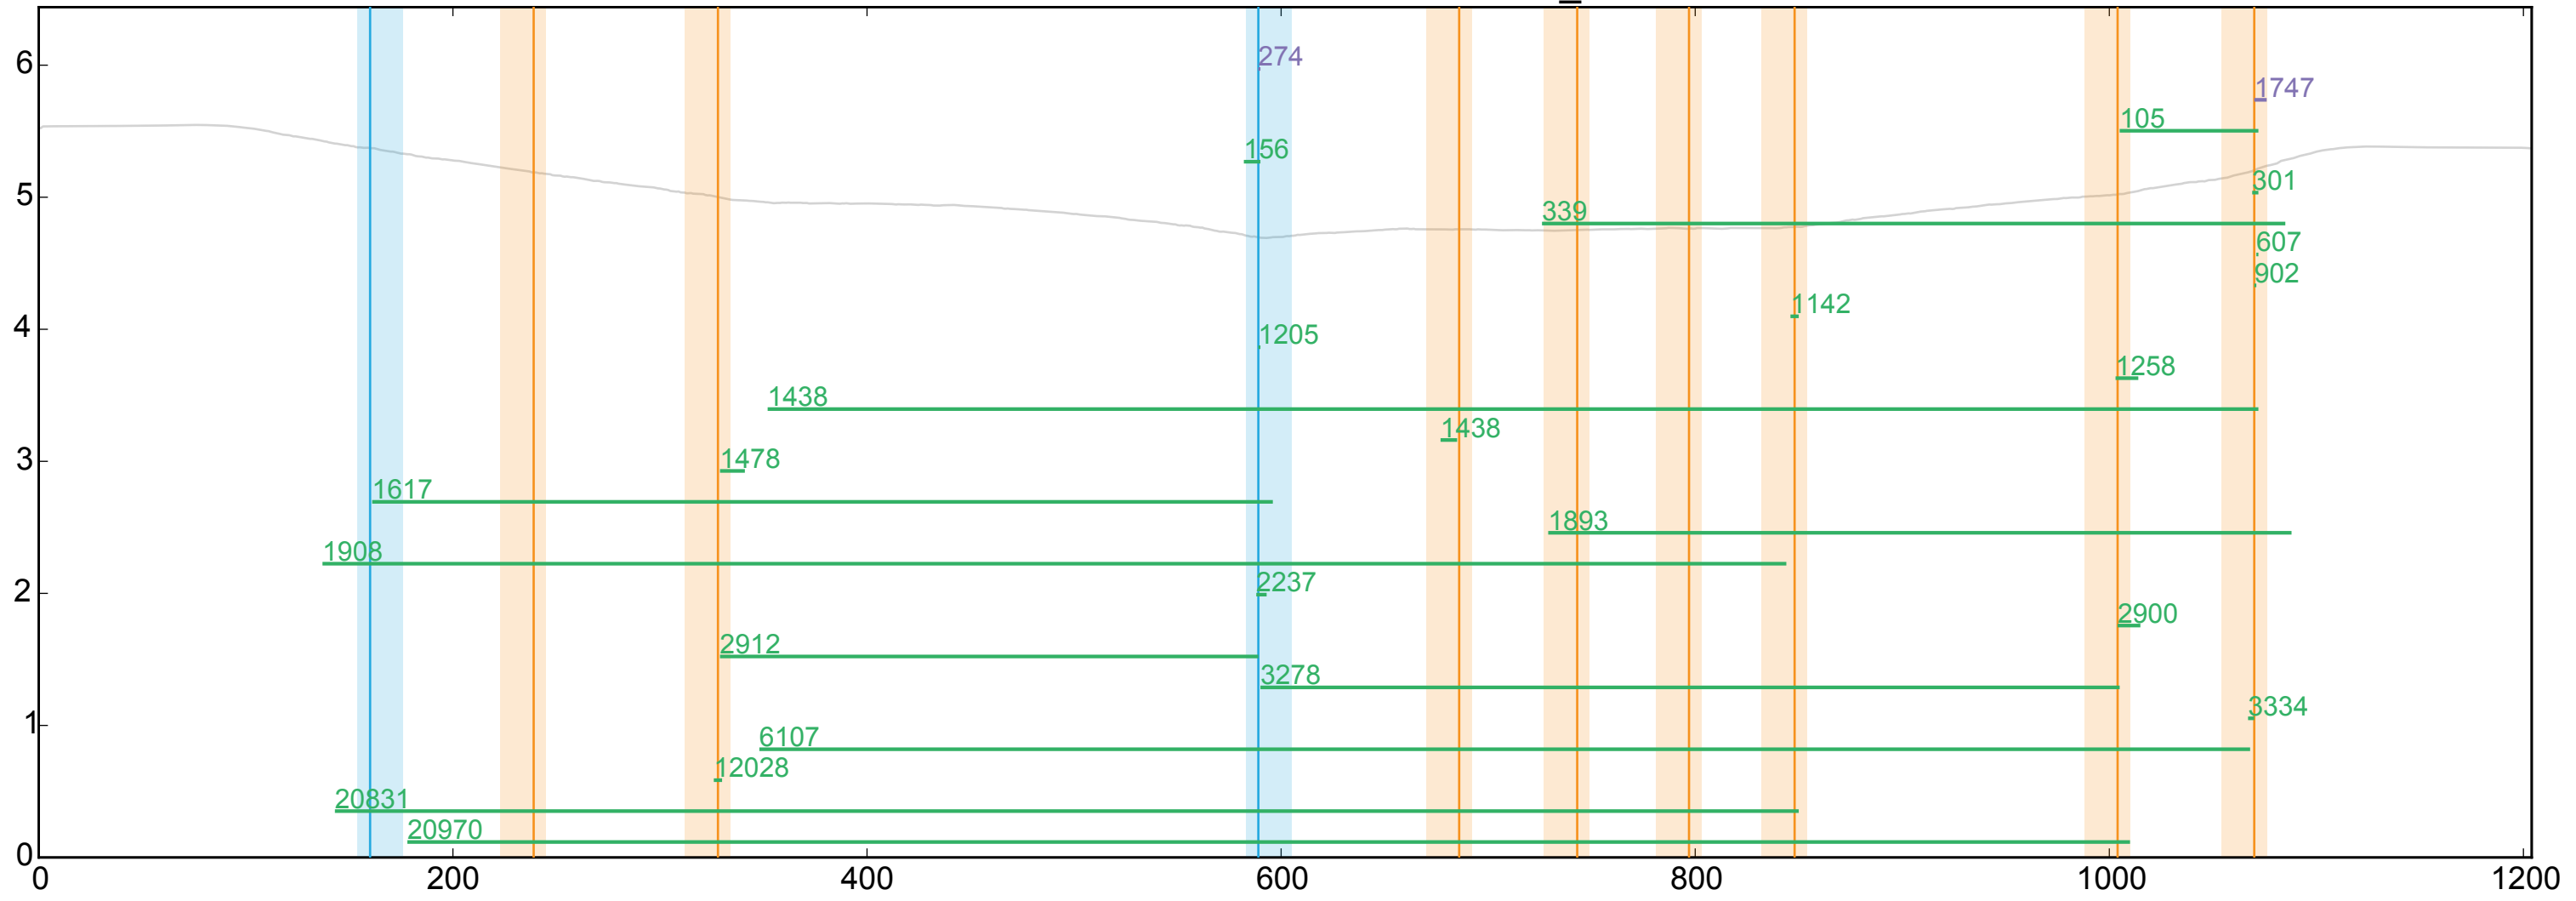

WT ENSDARG00000078355\_0

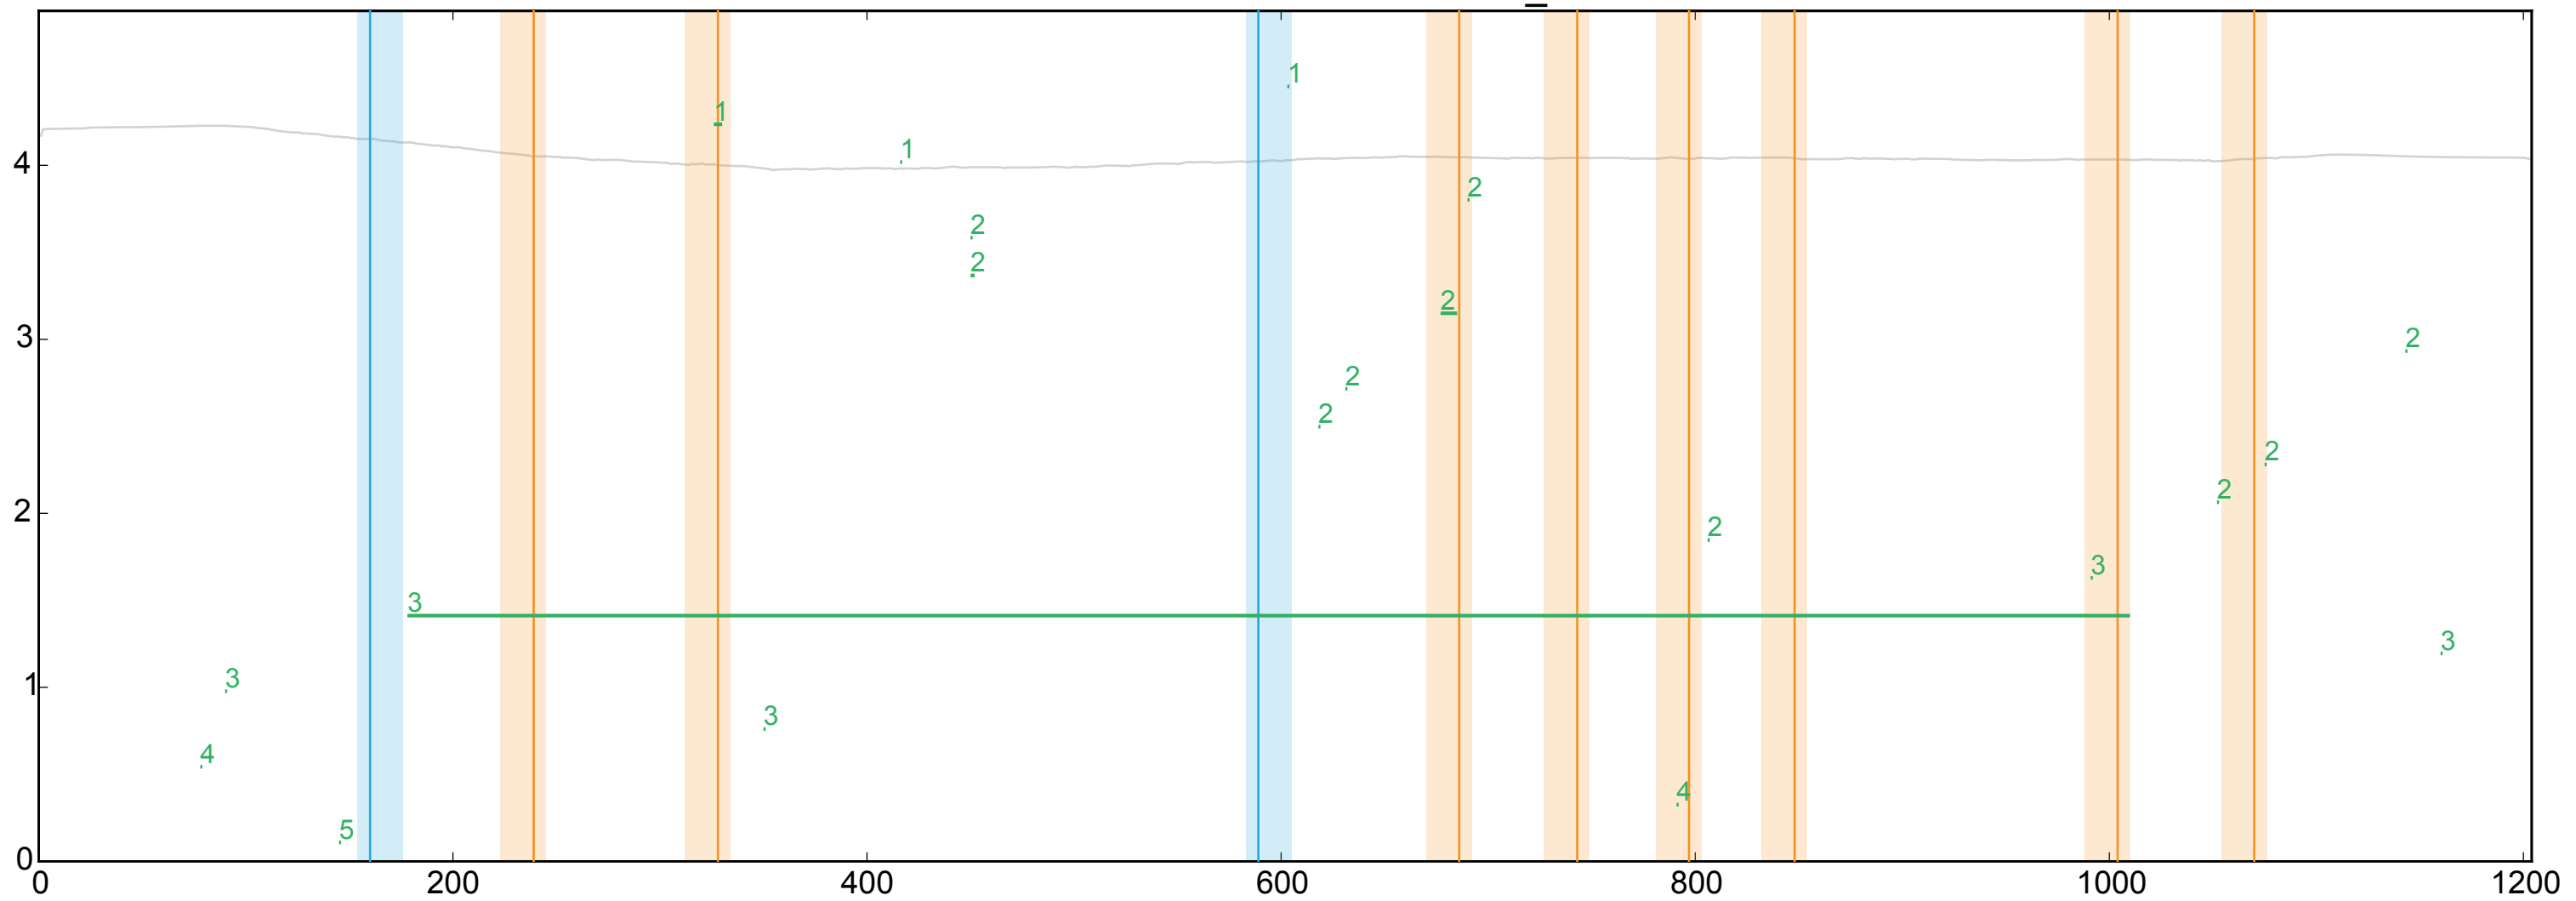

Mutant ENSDARG00000068406\_1

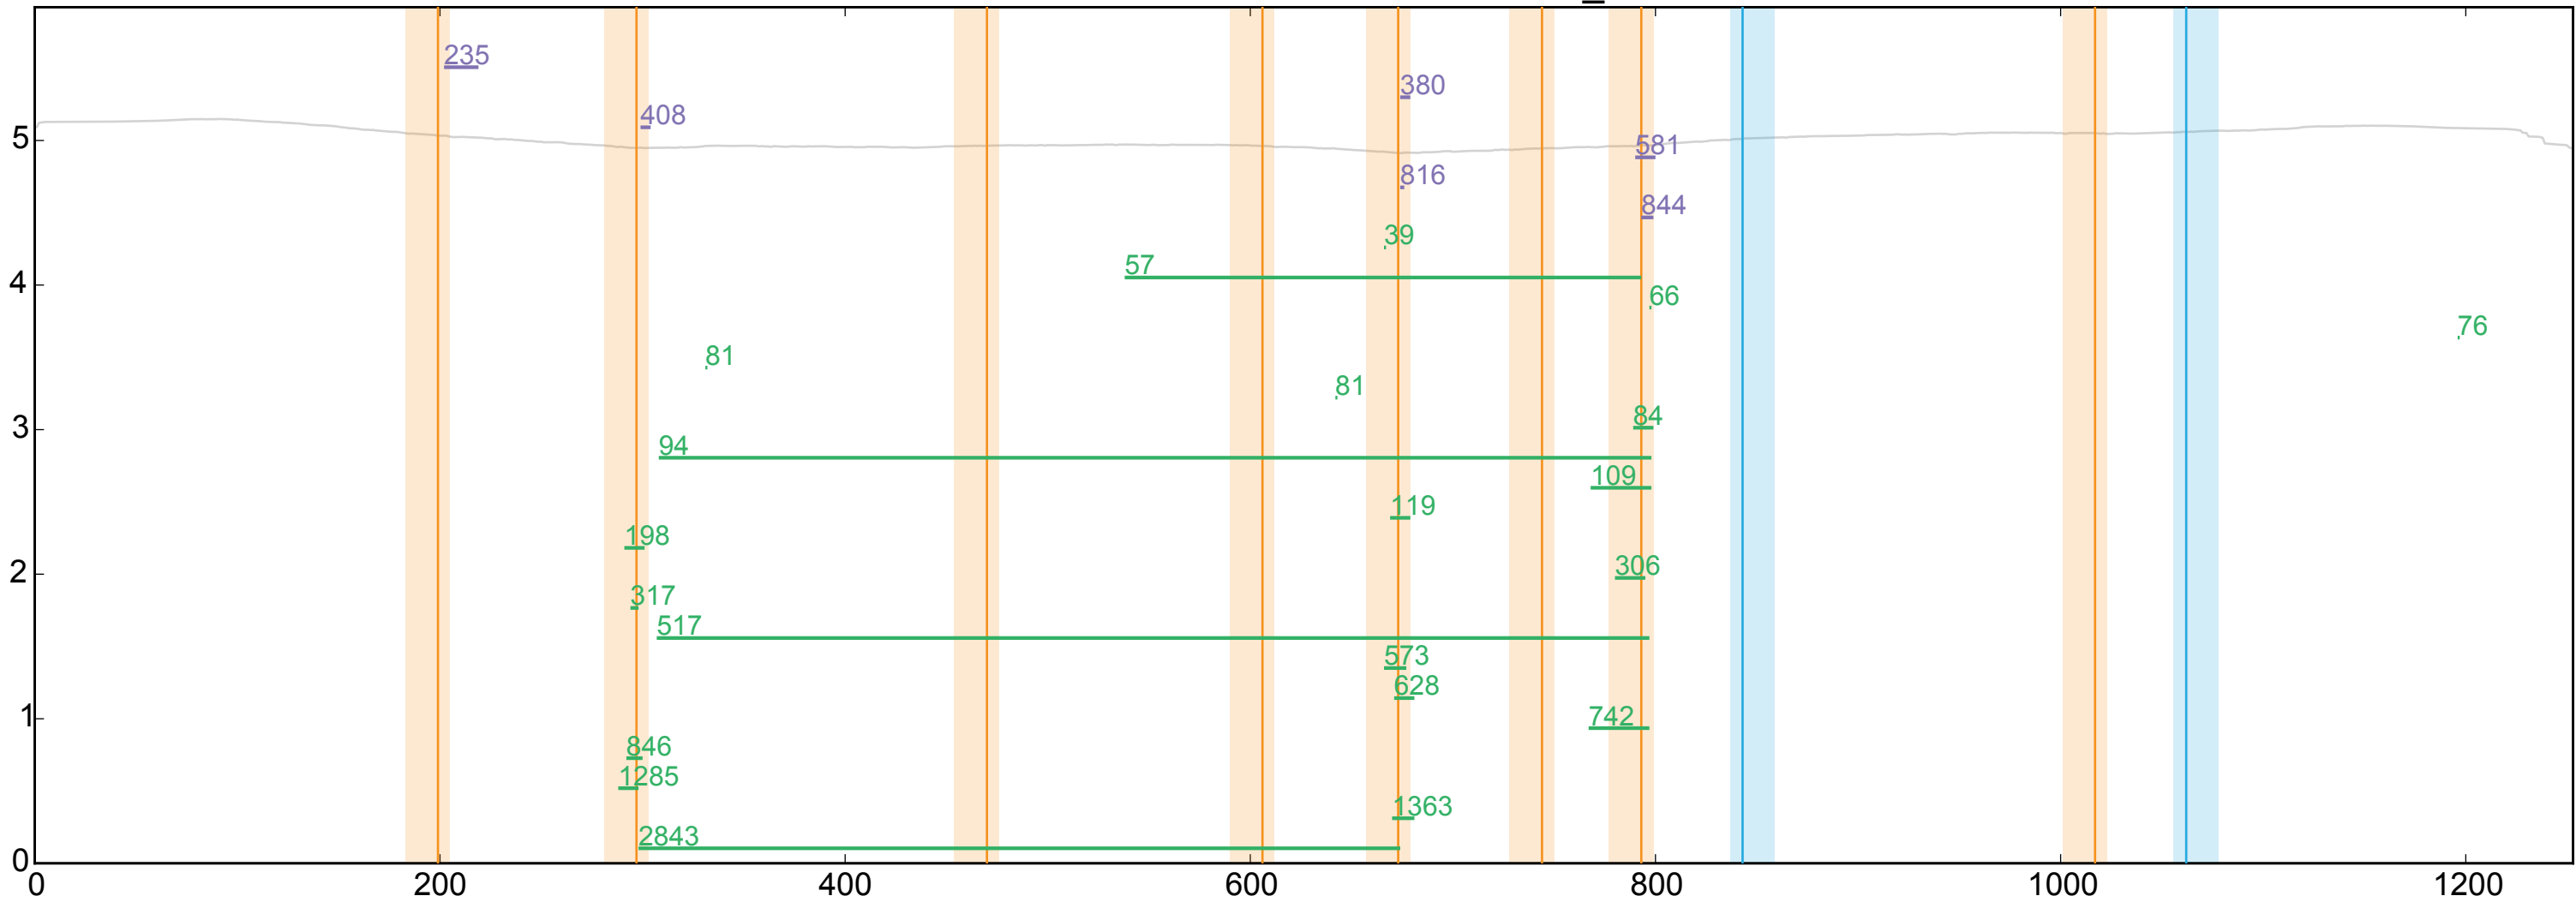

WT ENSDARG00000068406\_1

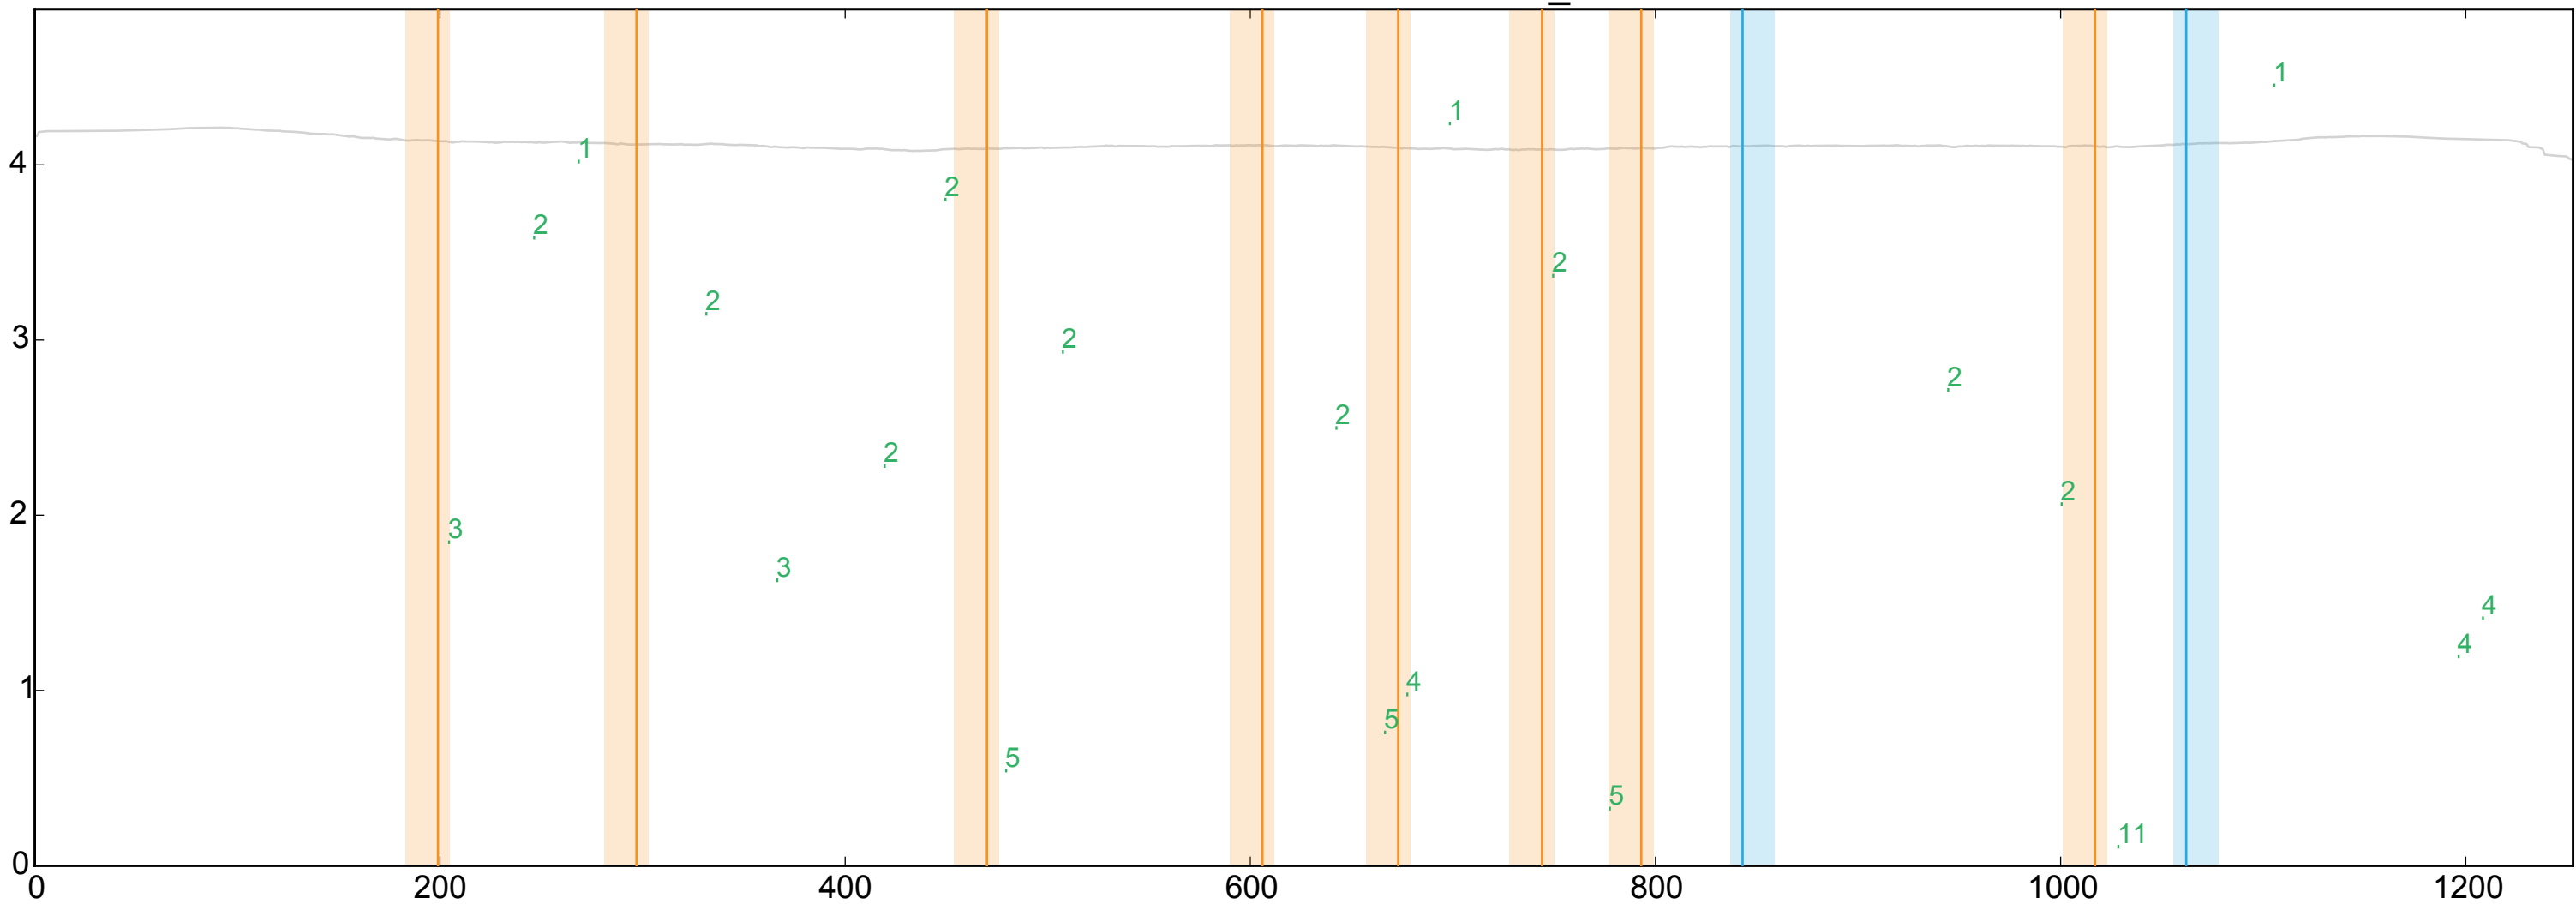



Mutant ENSDARG00000028415\_0

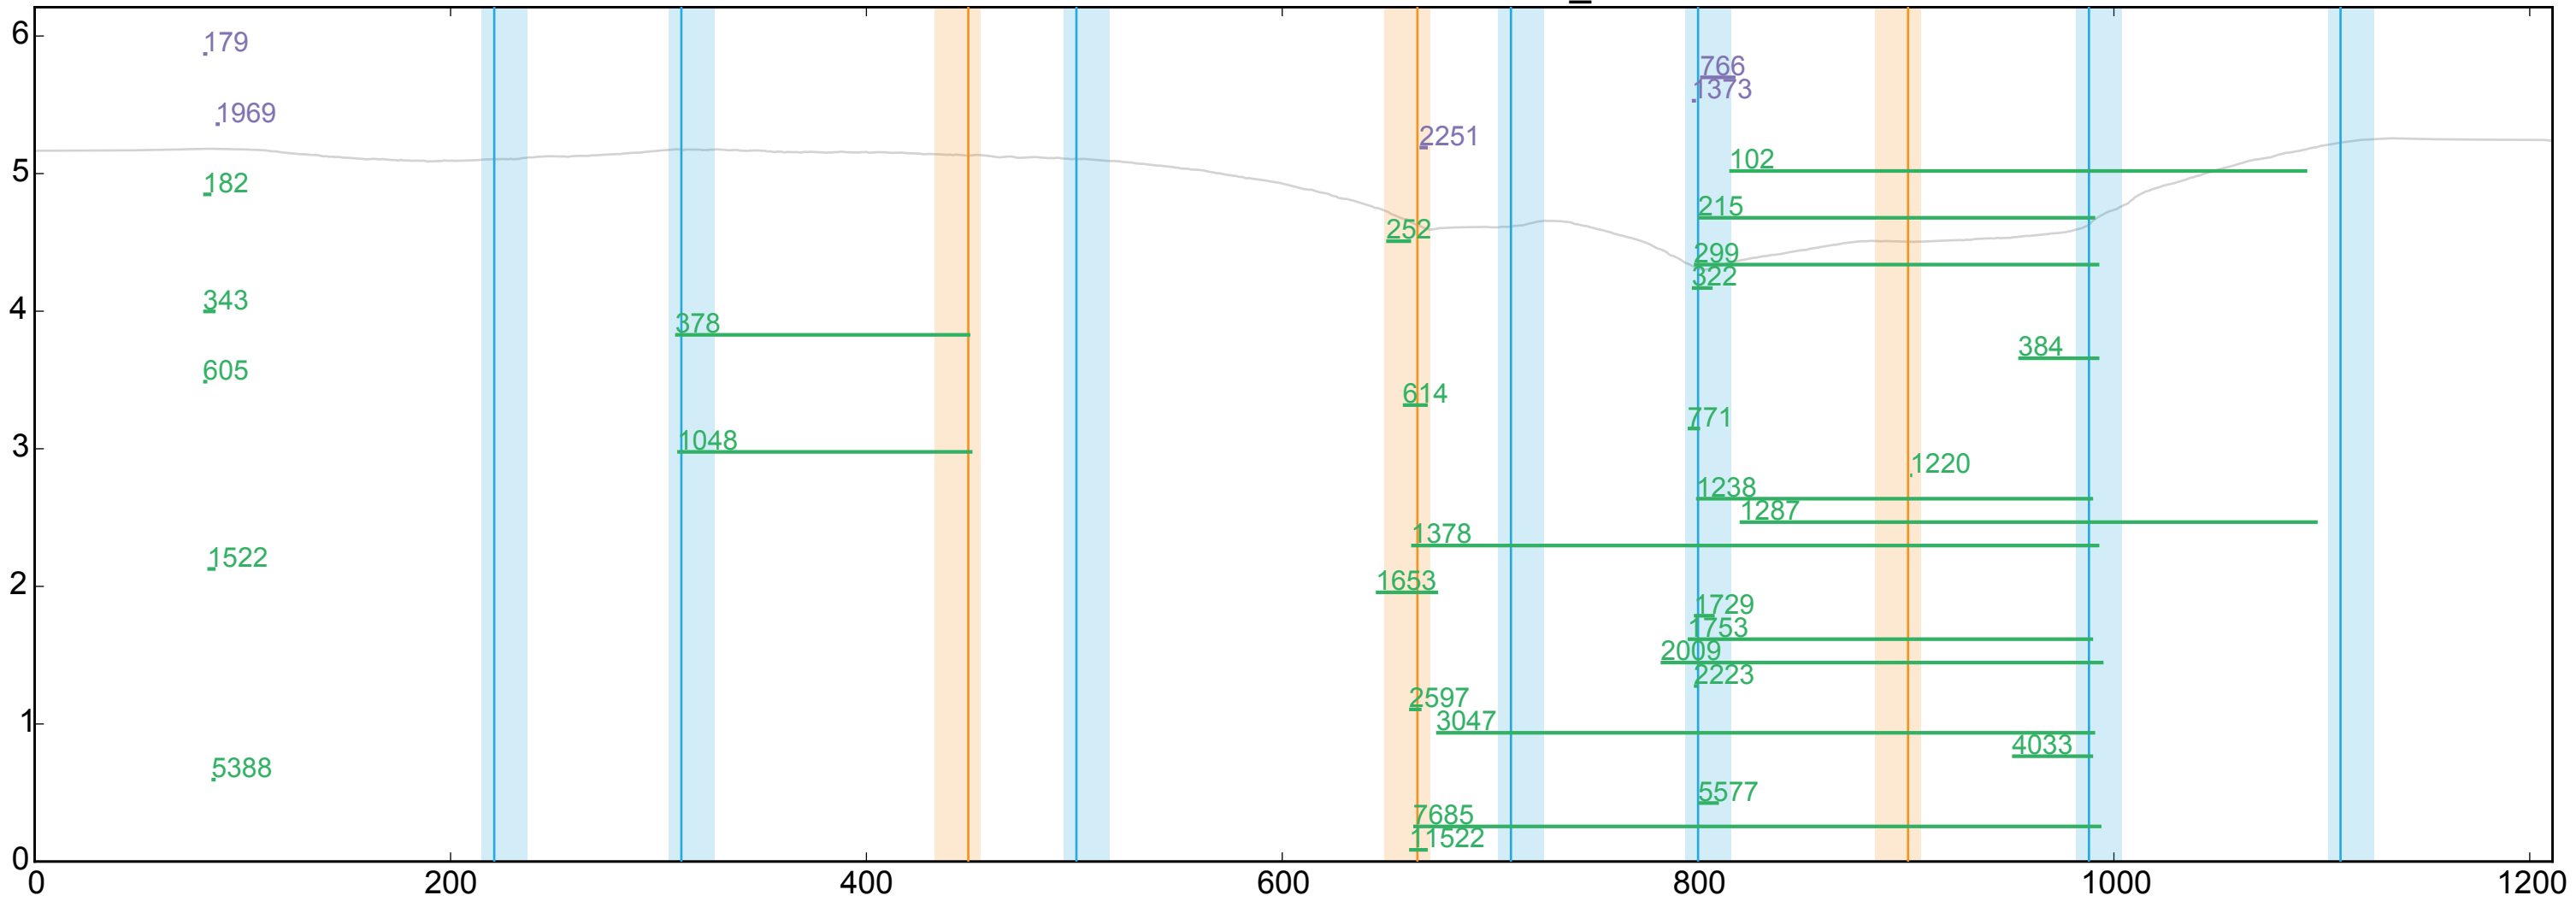

WT ENSDARG00000028415\_0

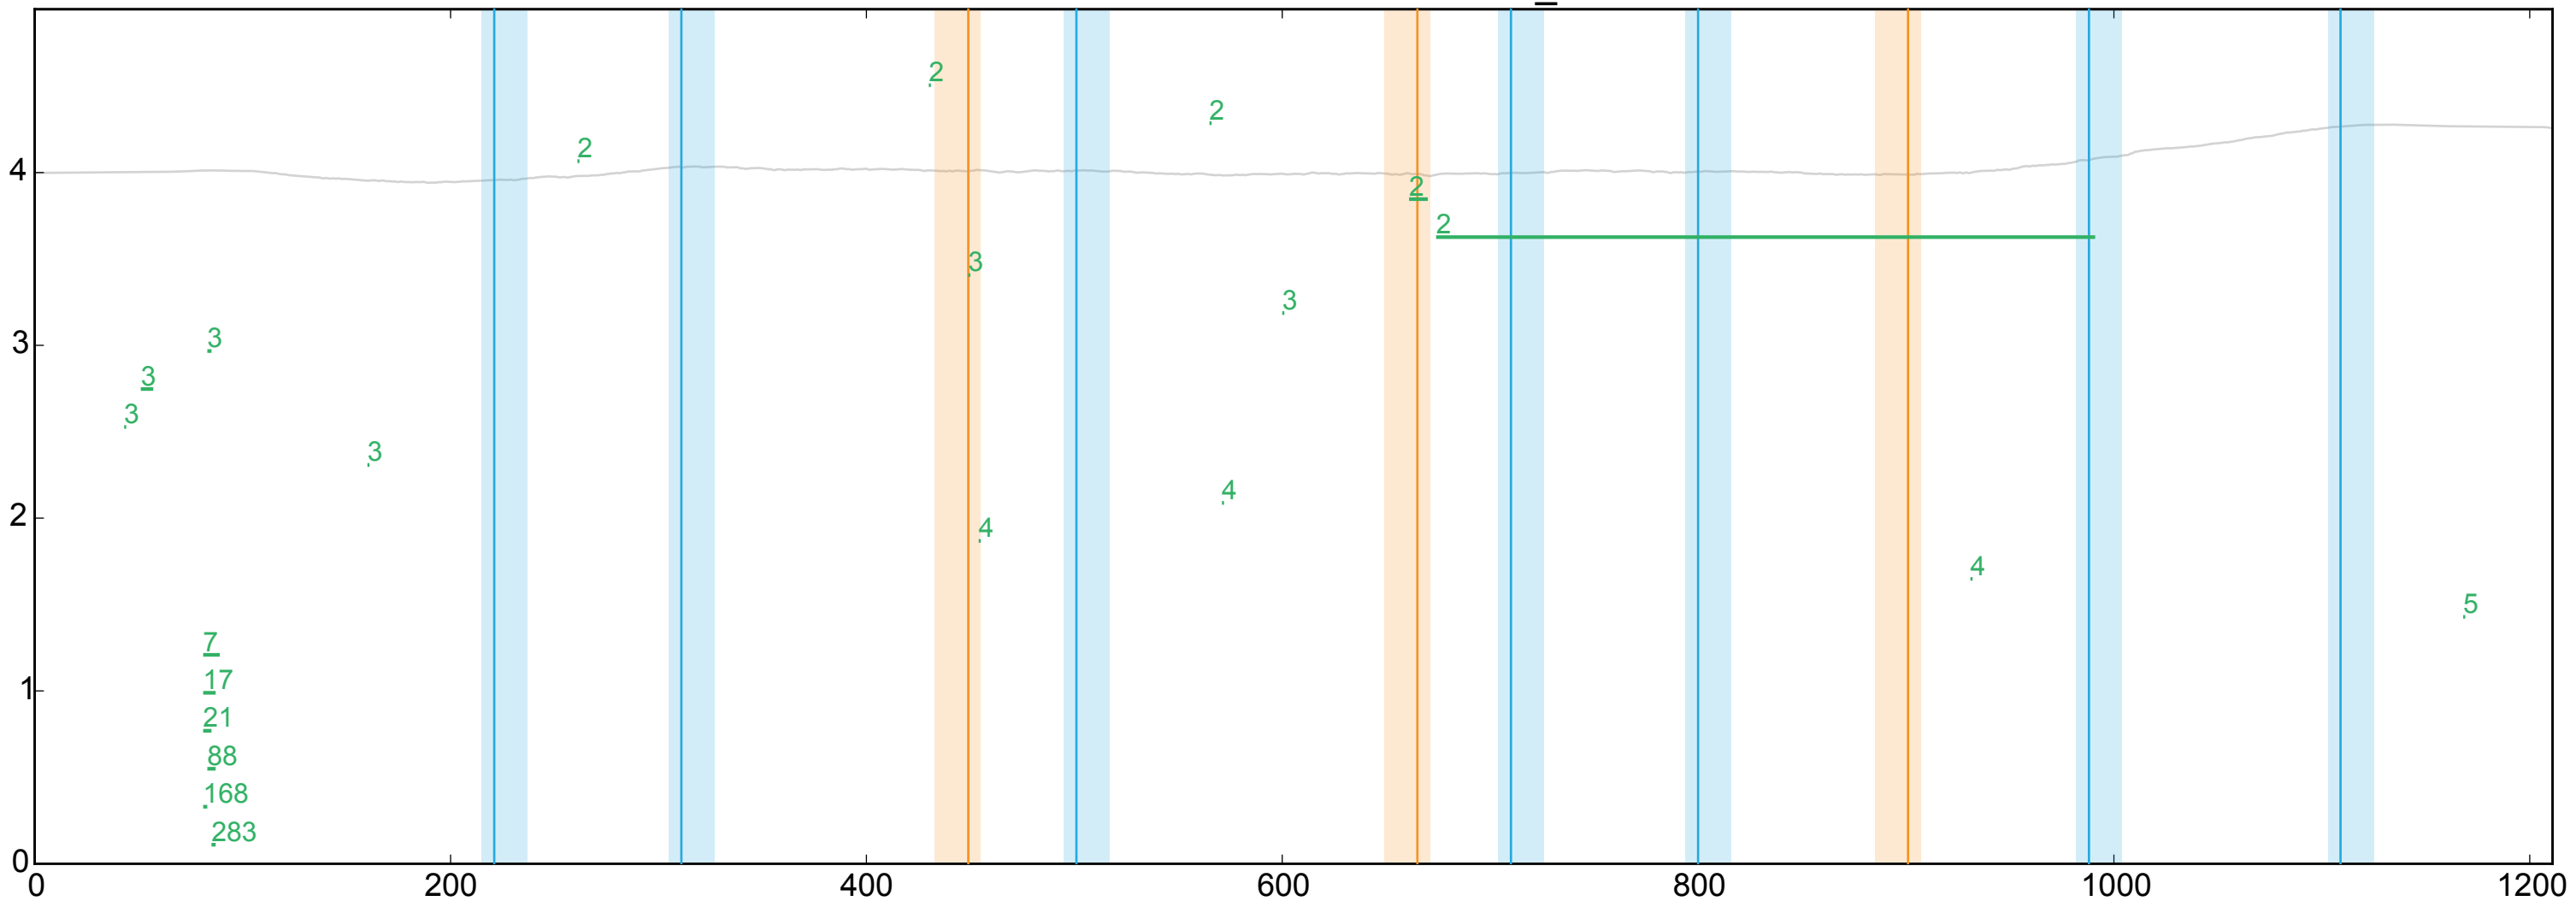

Mutant ENSDARG00000042861\_0

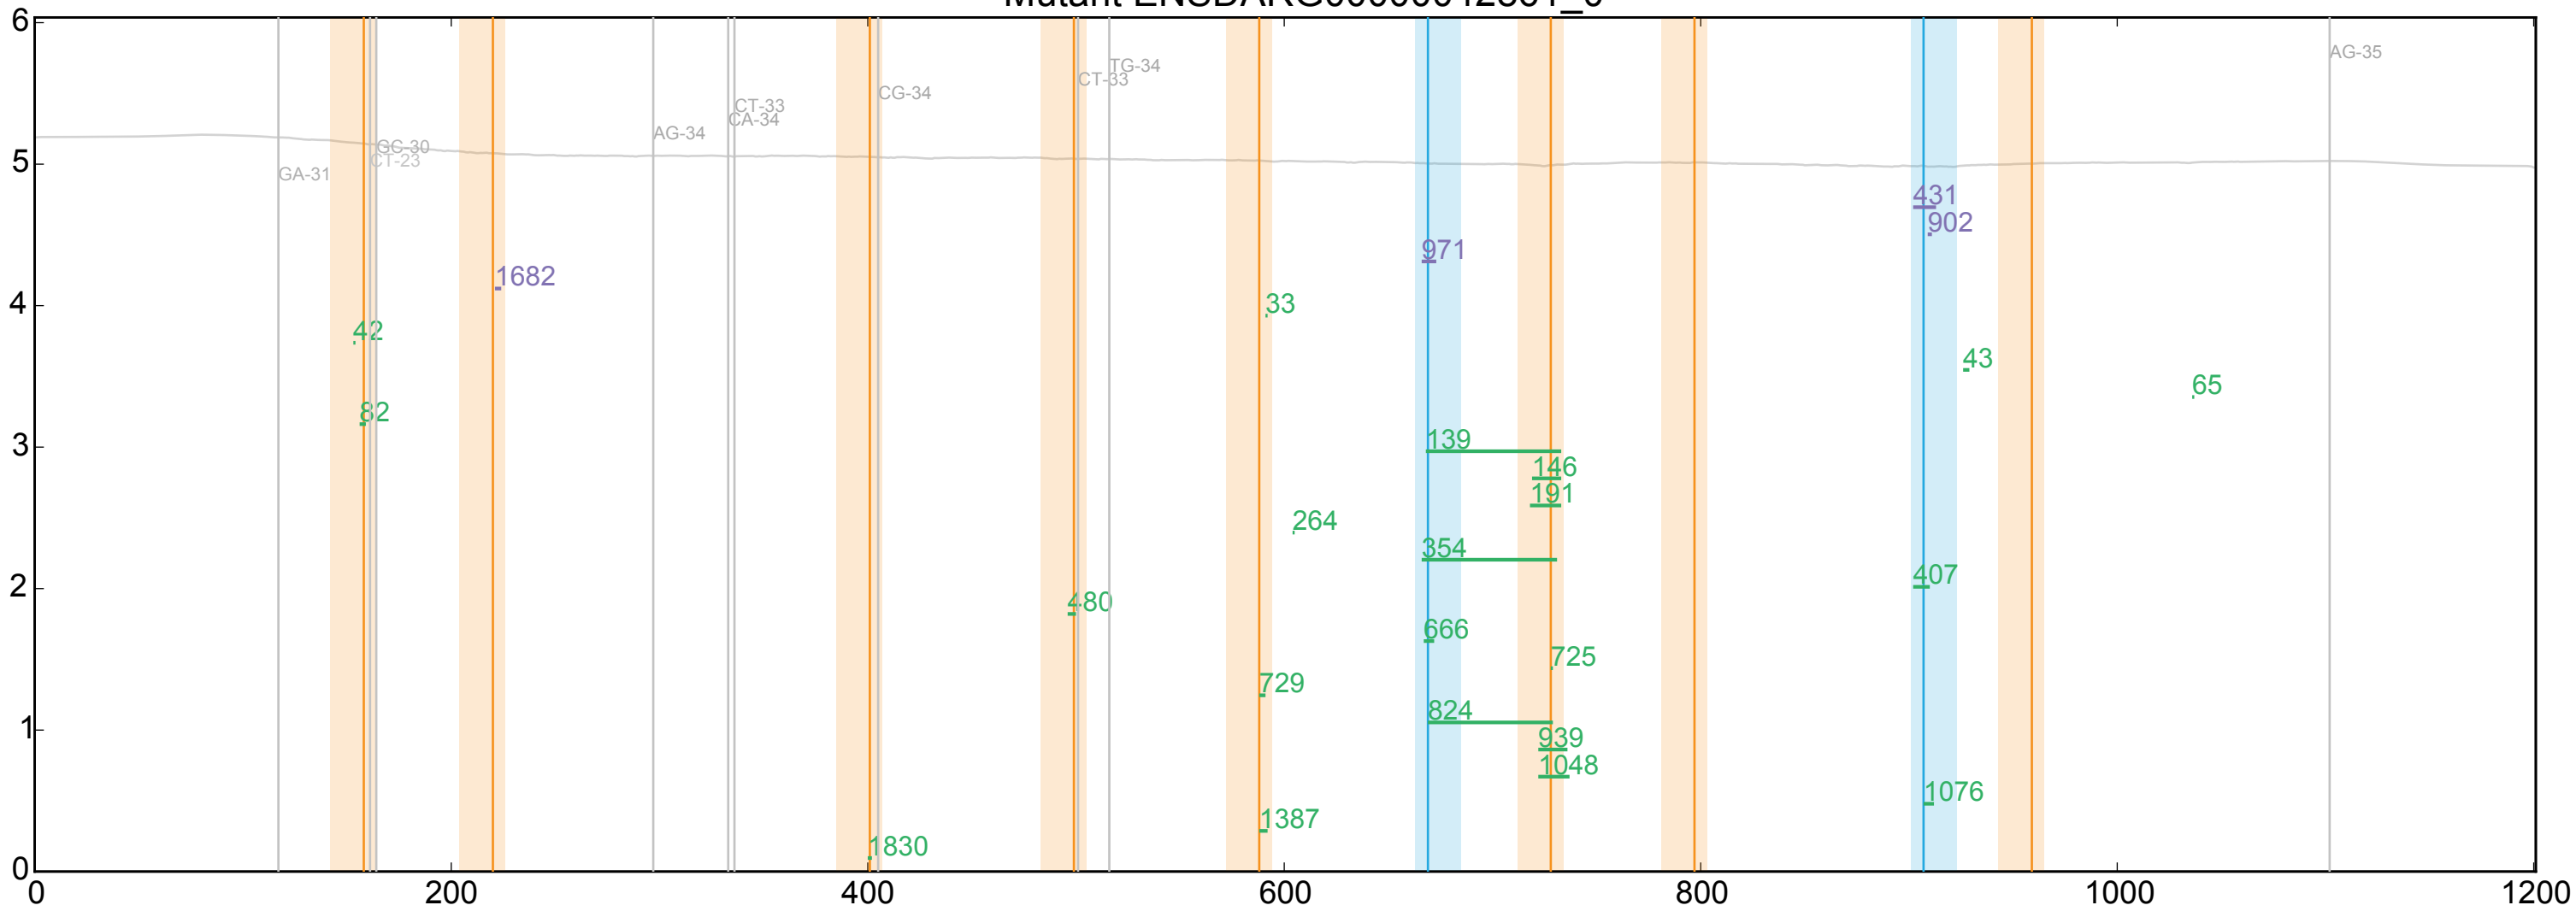

WT ENSDARG00000042861\_0

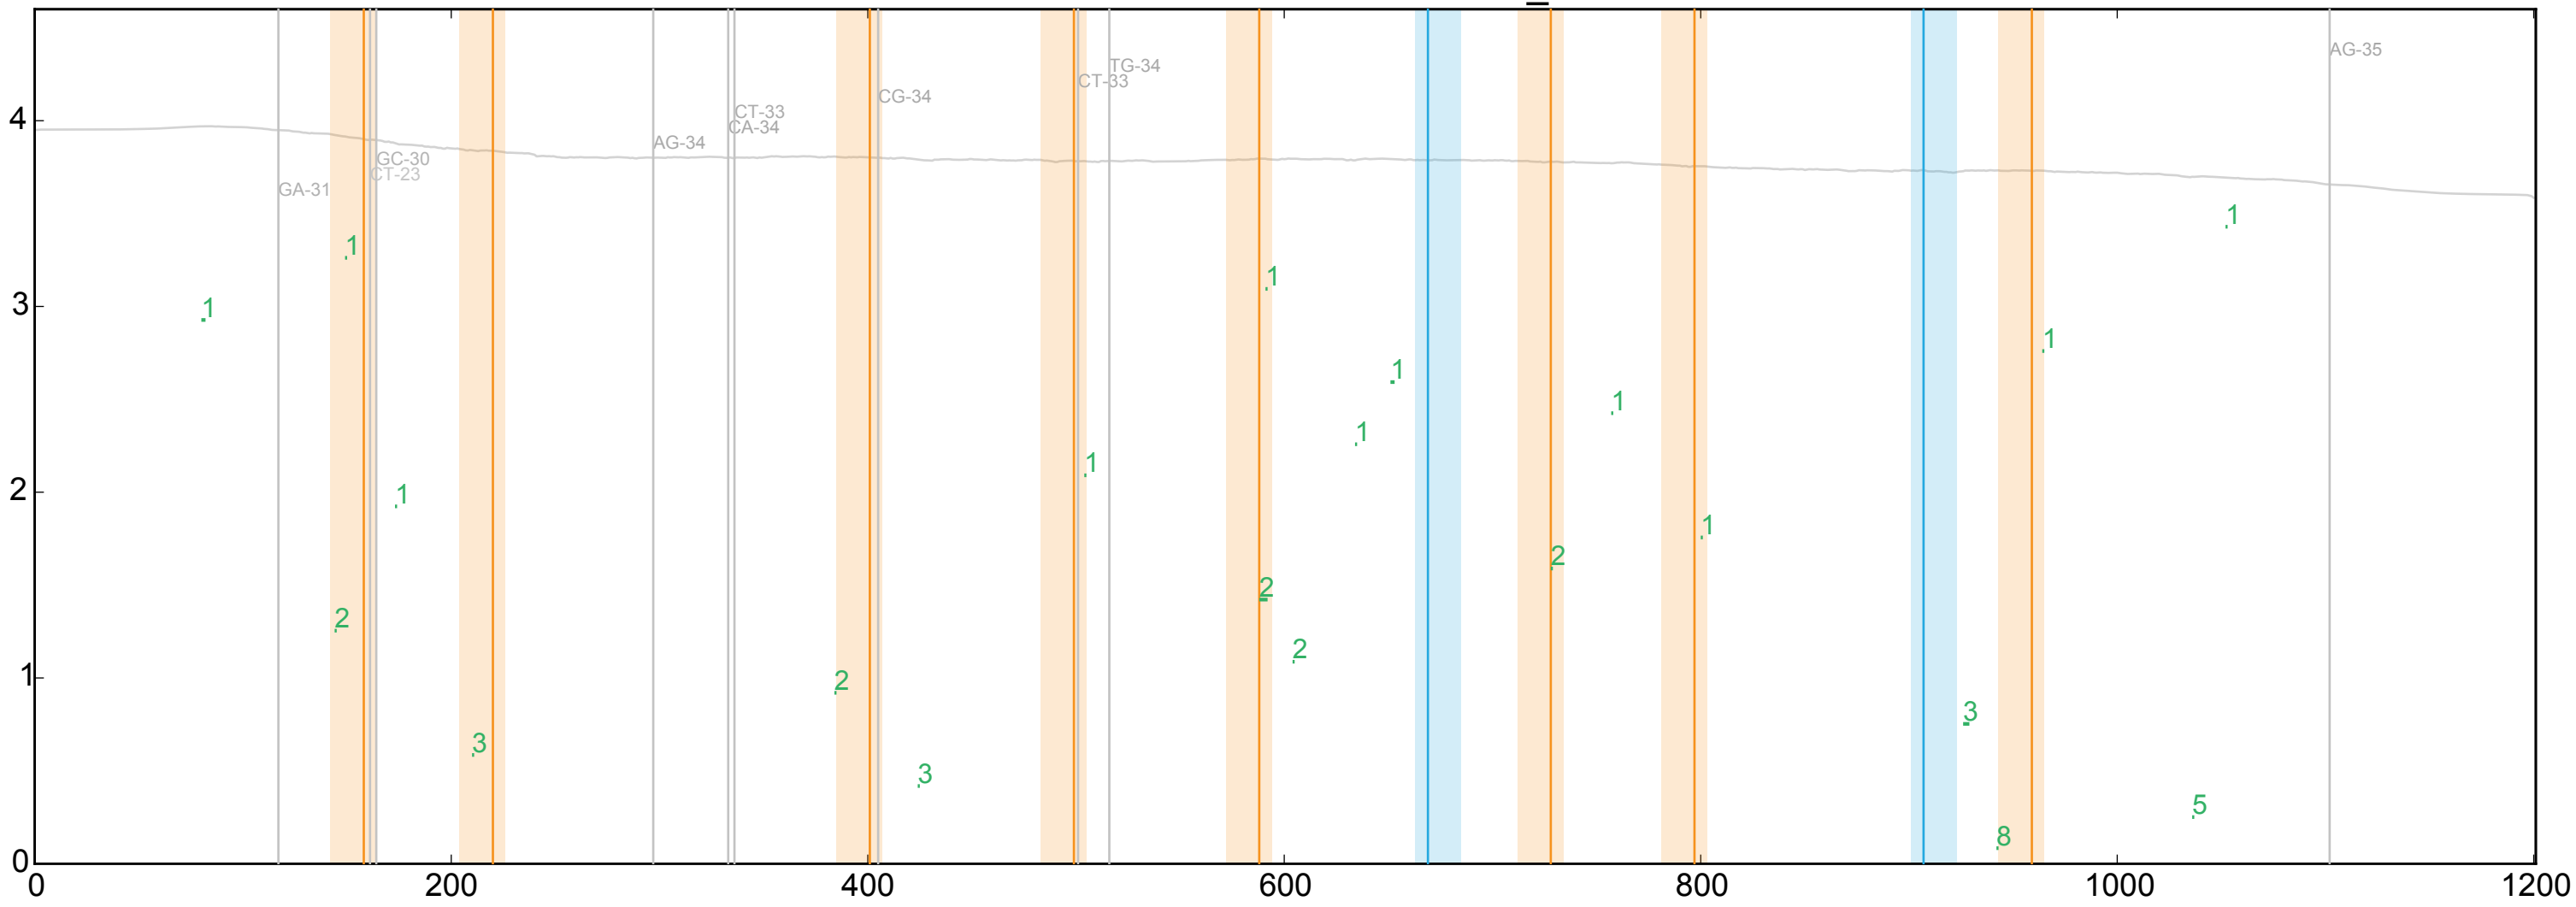

Mutant ENSDARG00000041572\_0

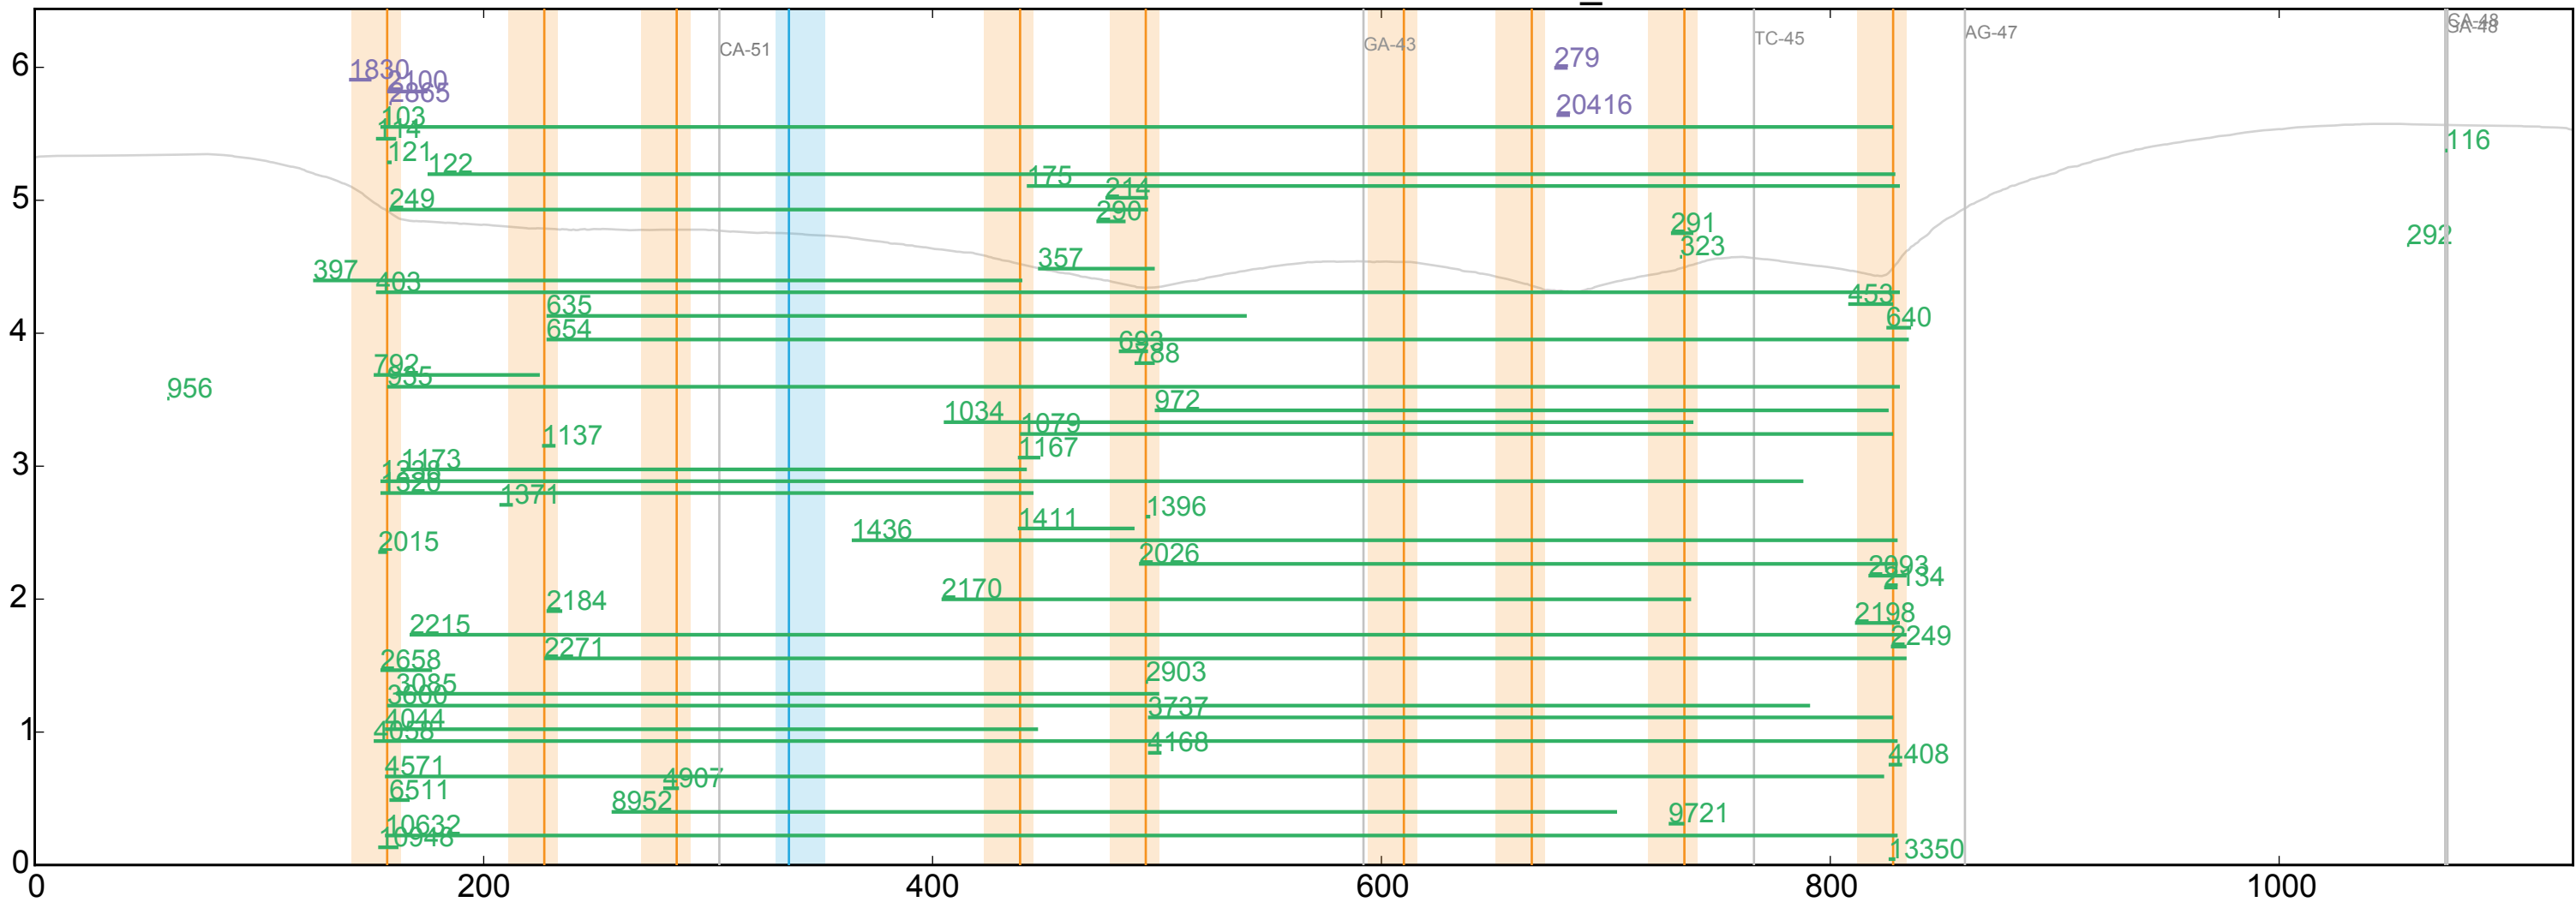

WT ENSDARG00000041572\_0

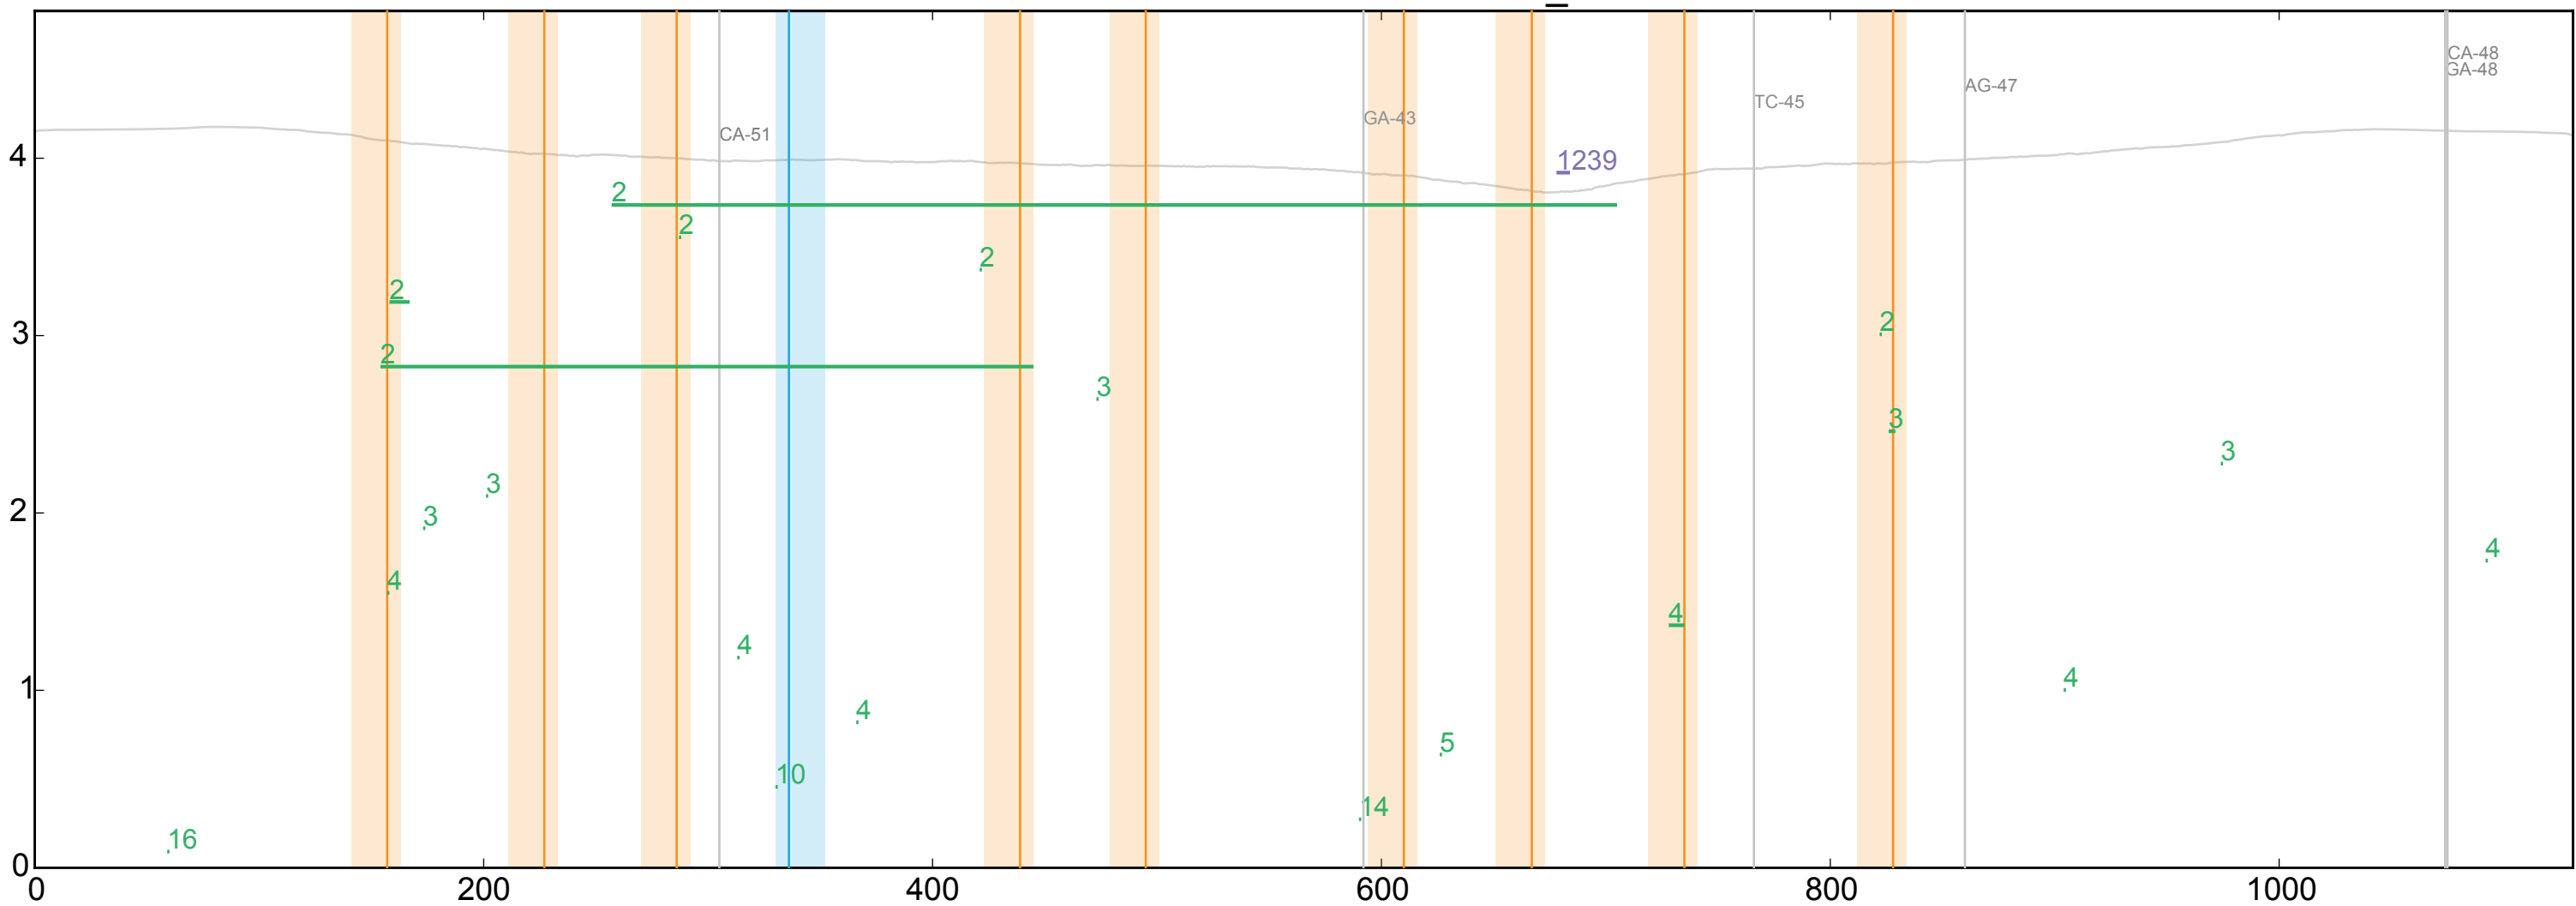

Mutant ENSDARG00000039392\_11

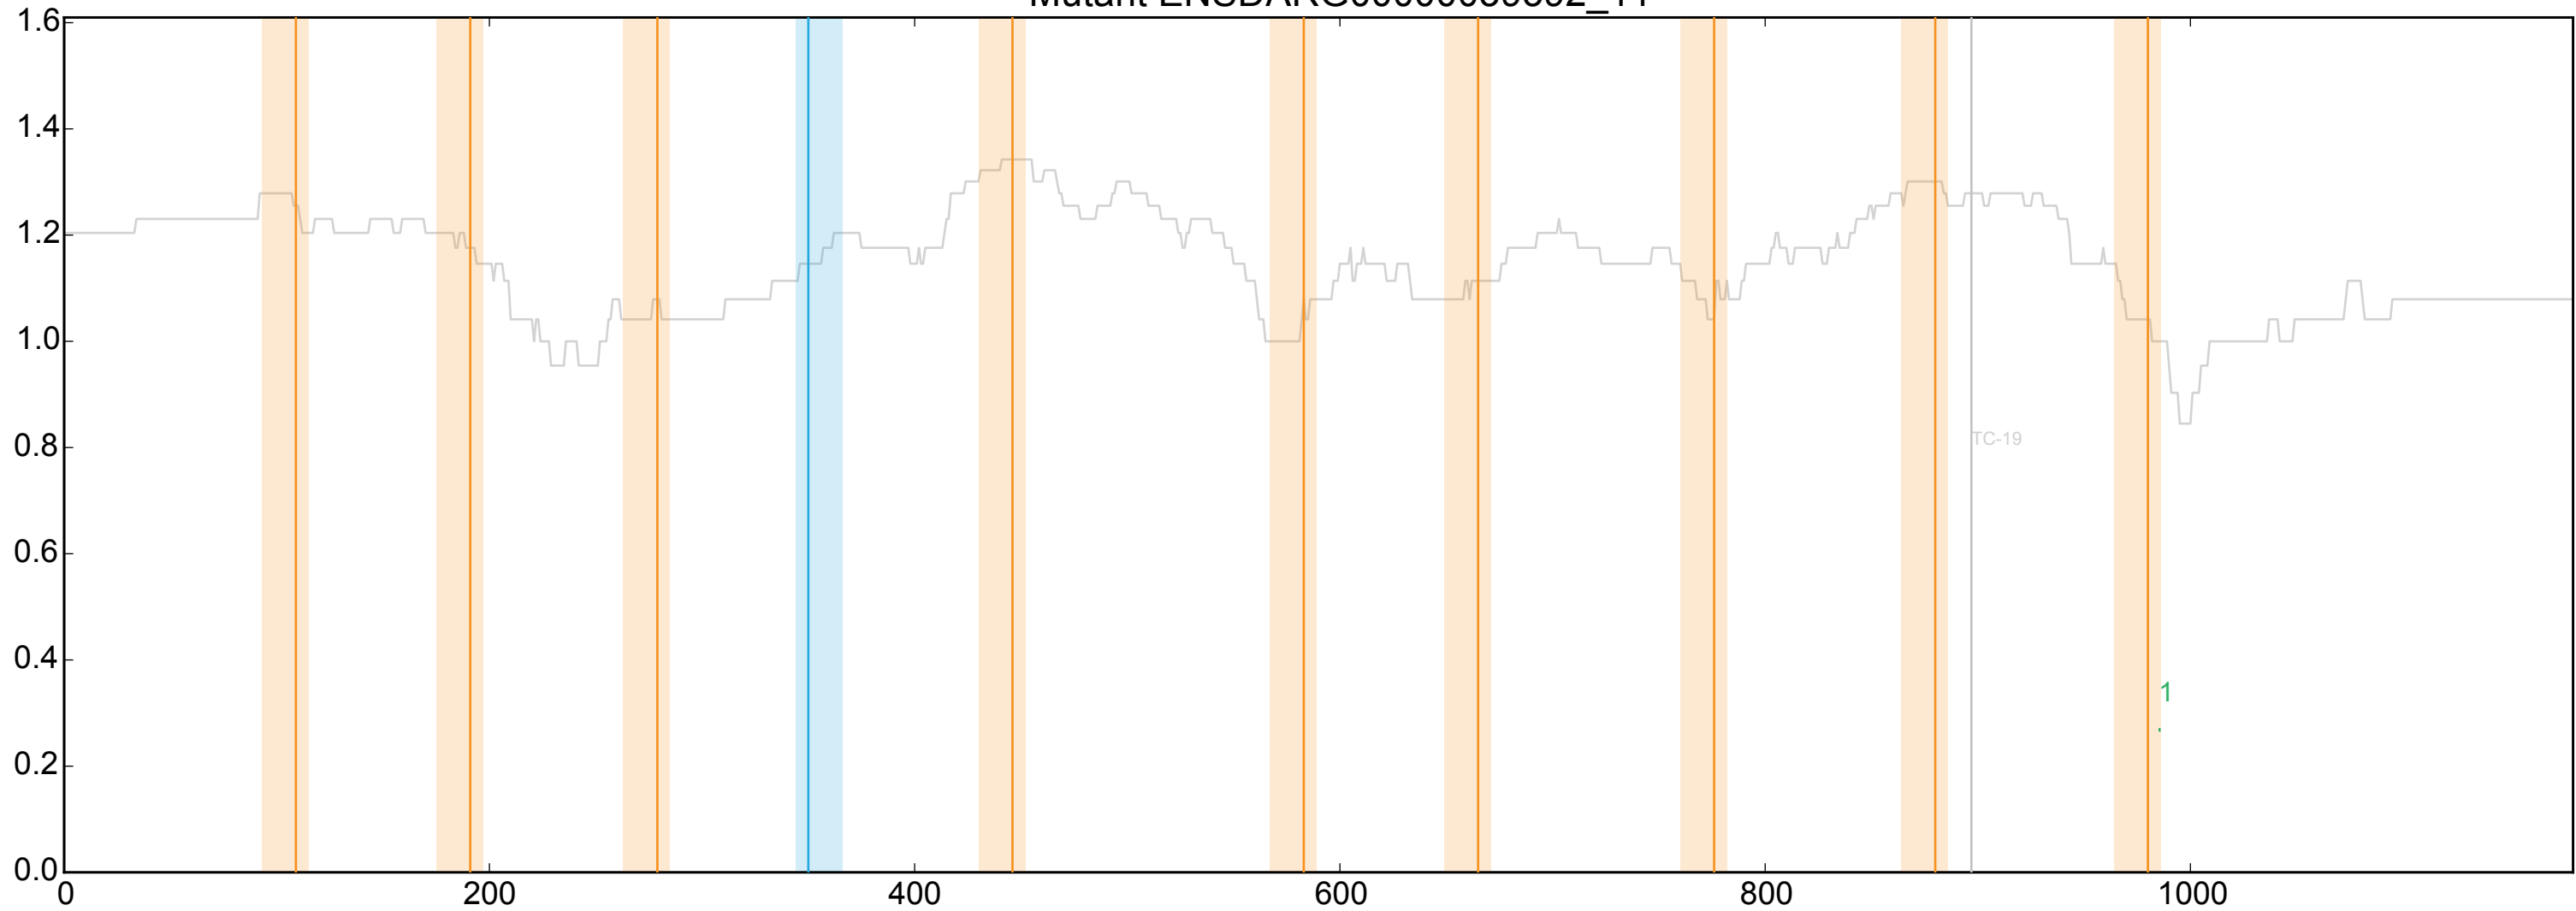

WT ENSDARG00000039392\_11

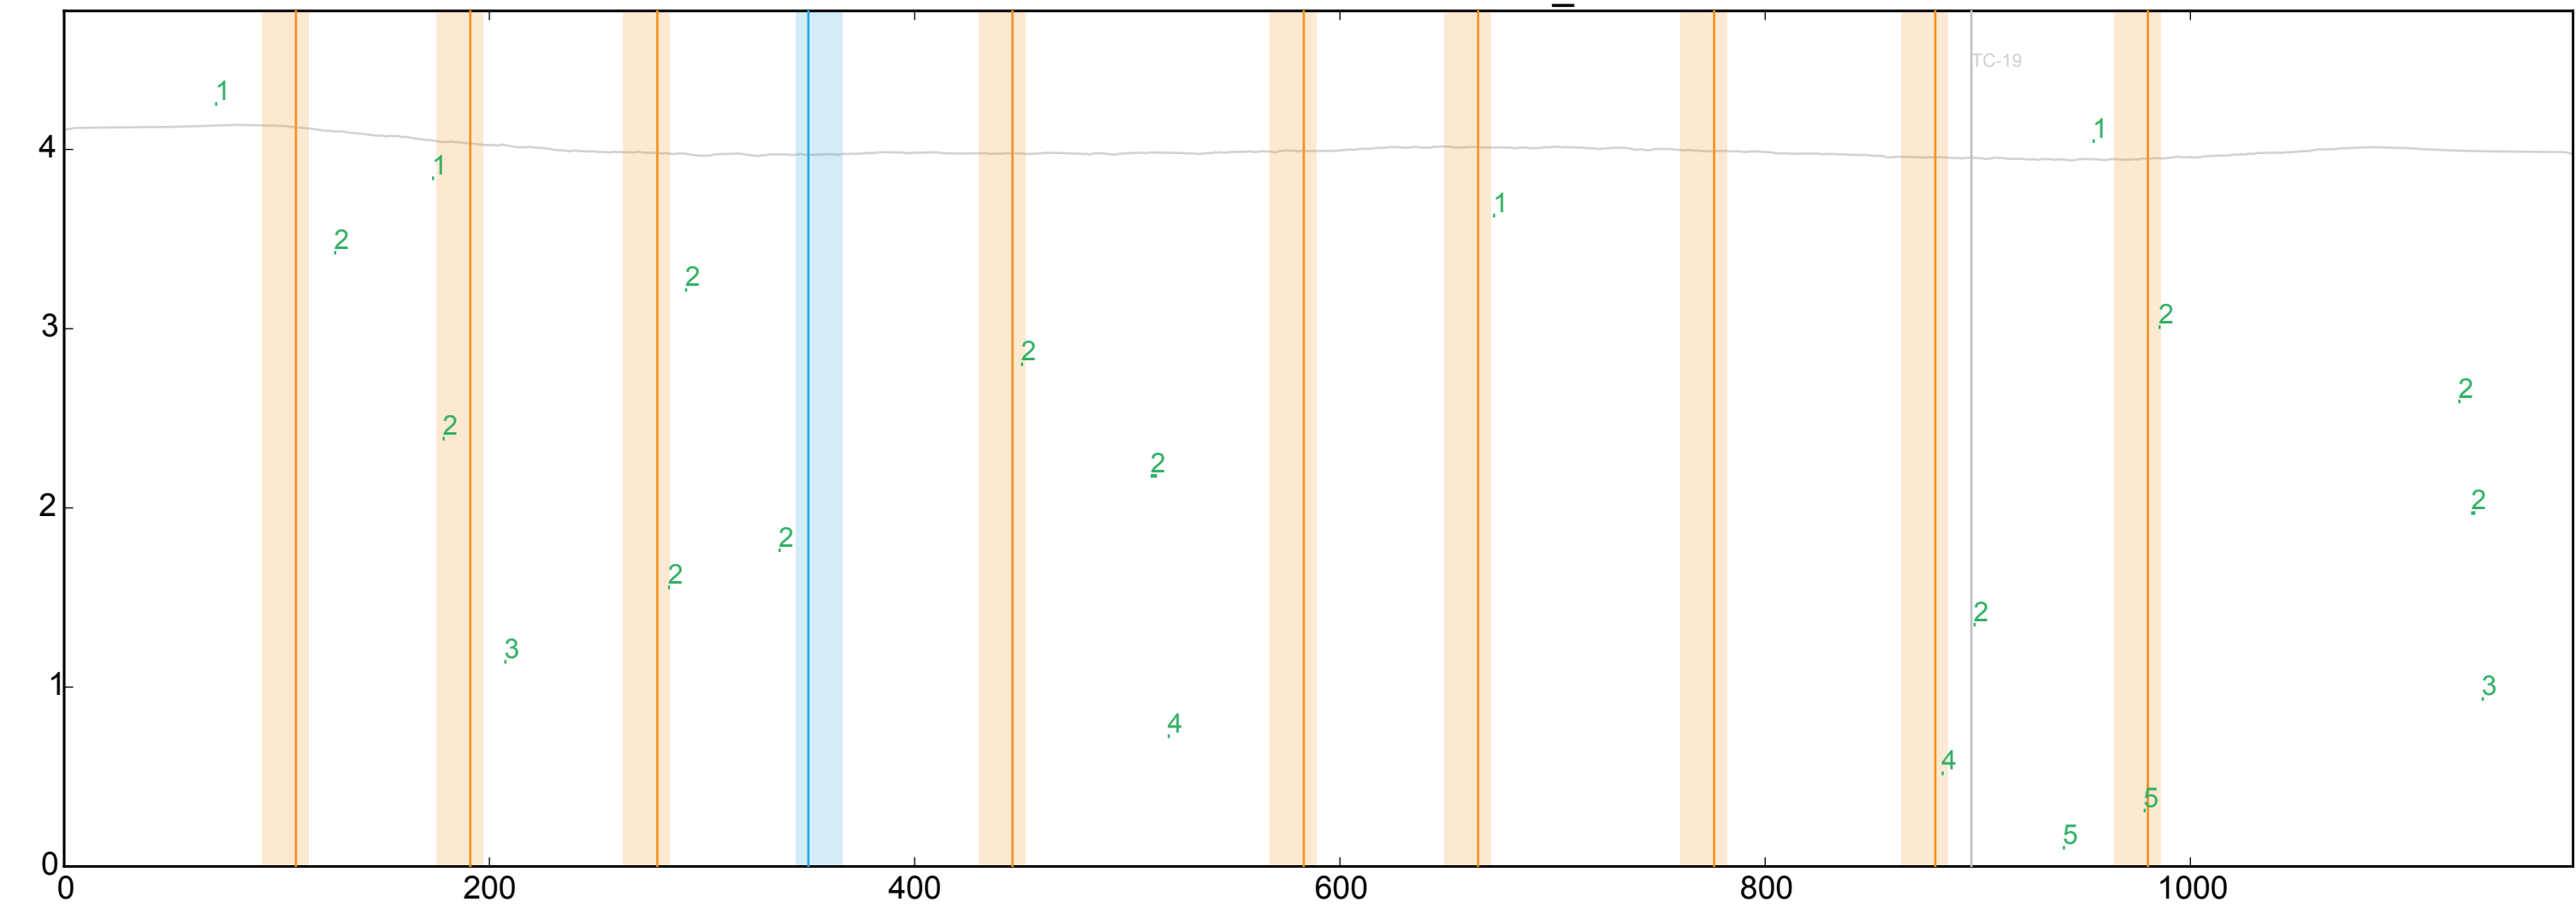



Mutant ENSDARG00000075849\_6

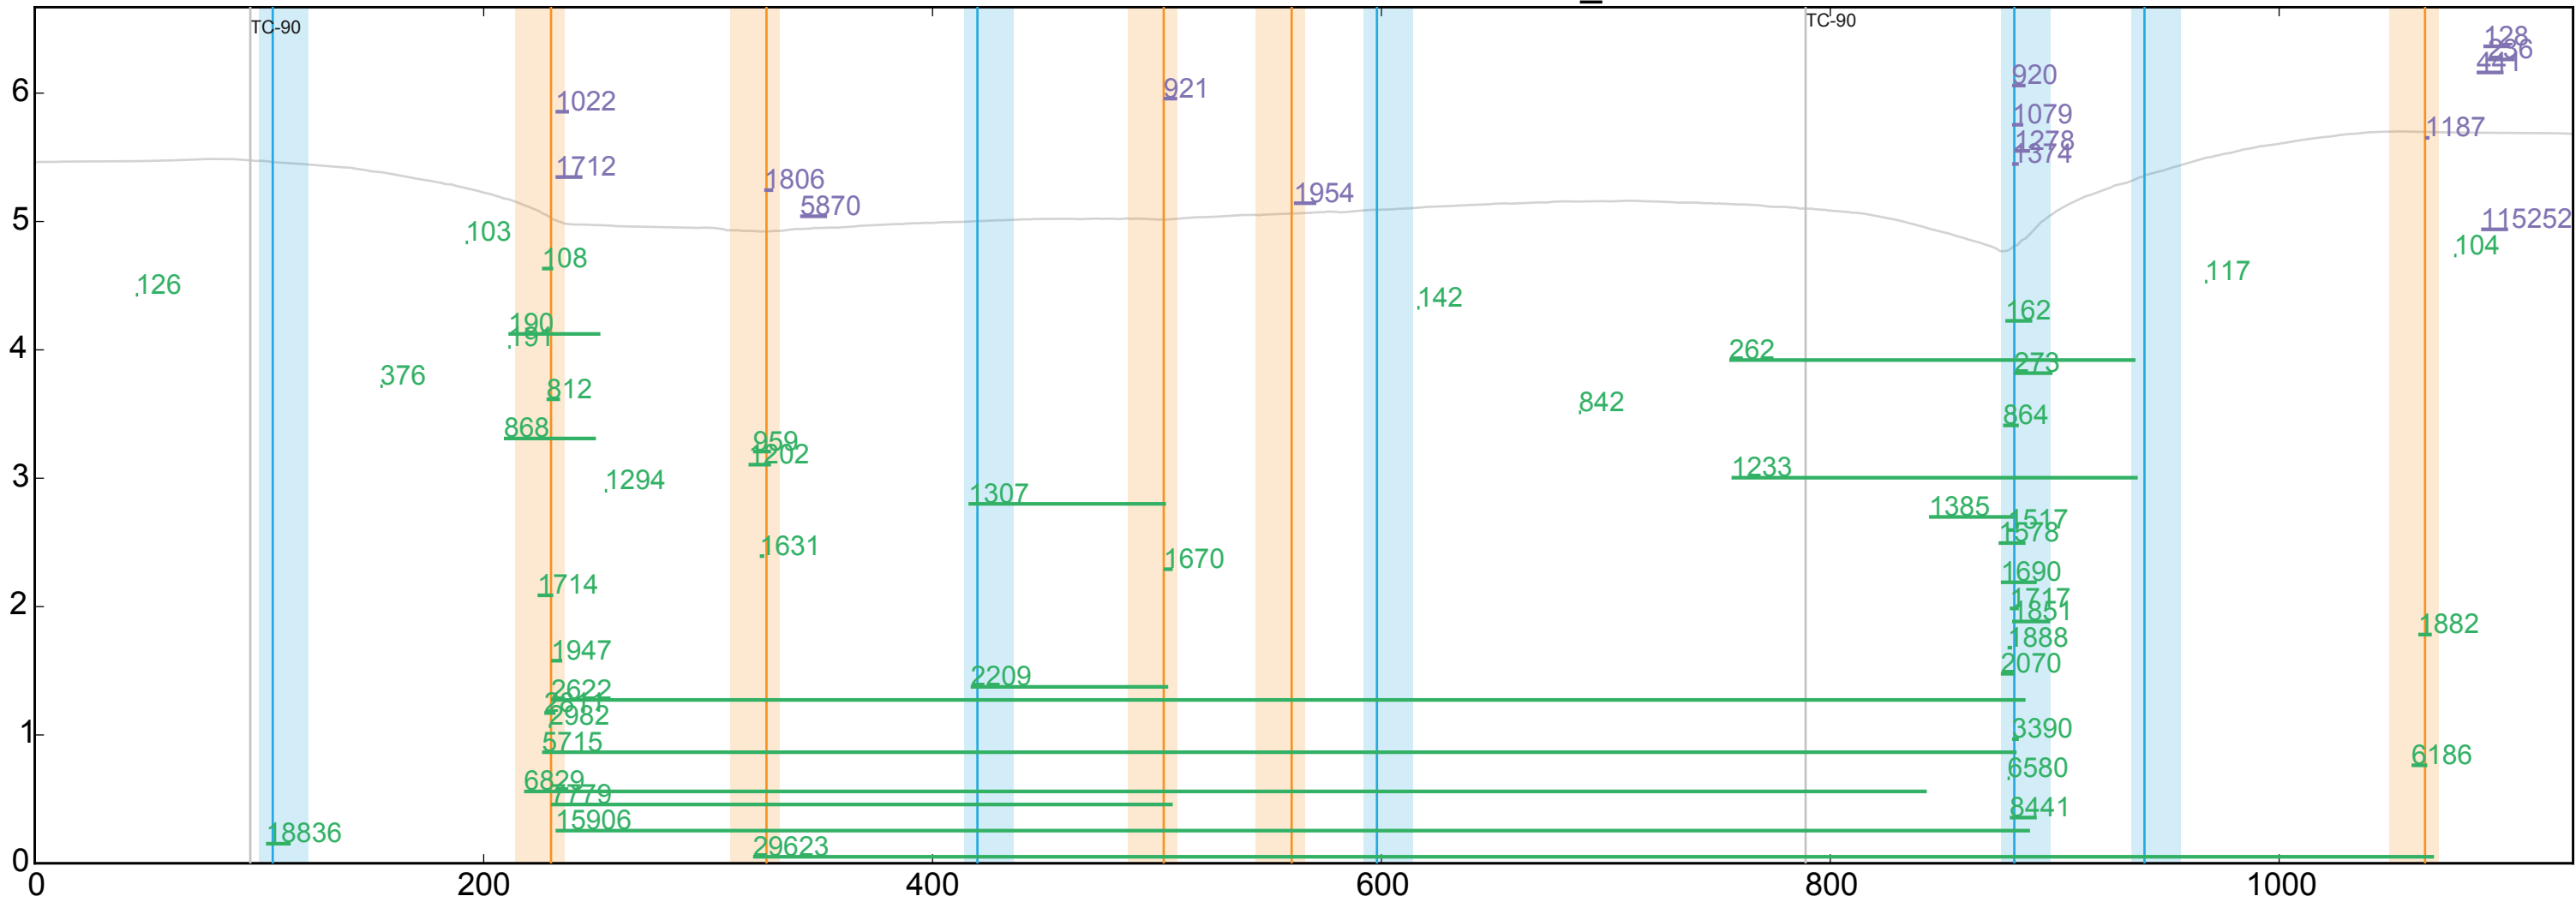

WT ENSDARG00000075849\_6

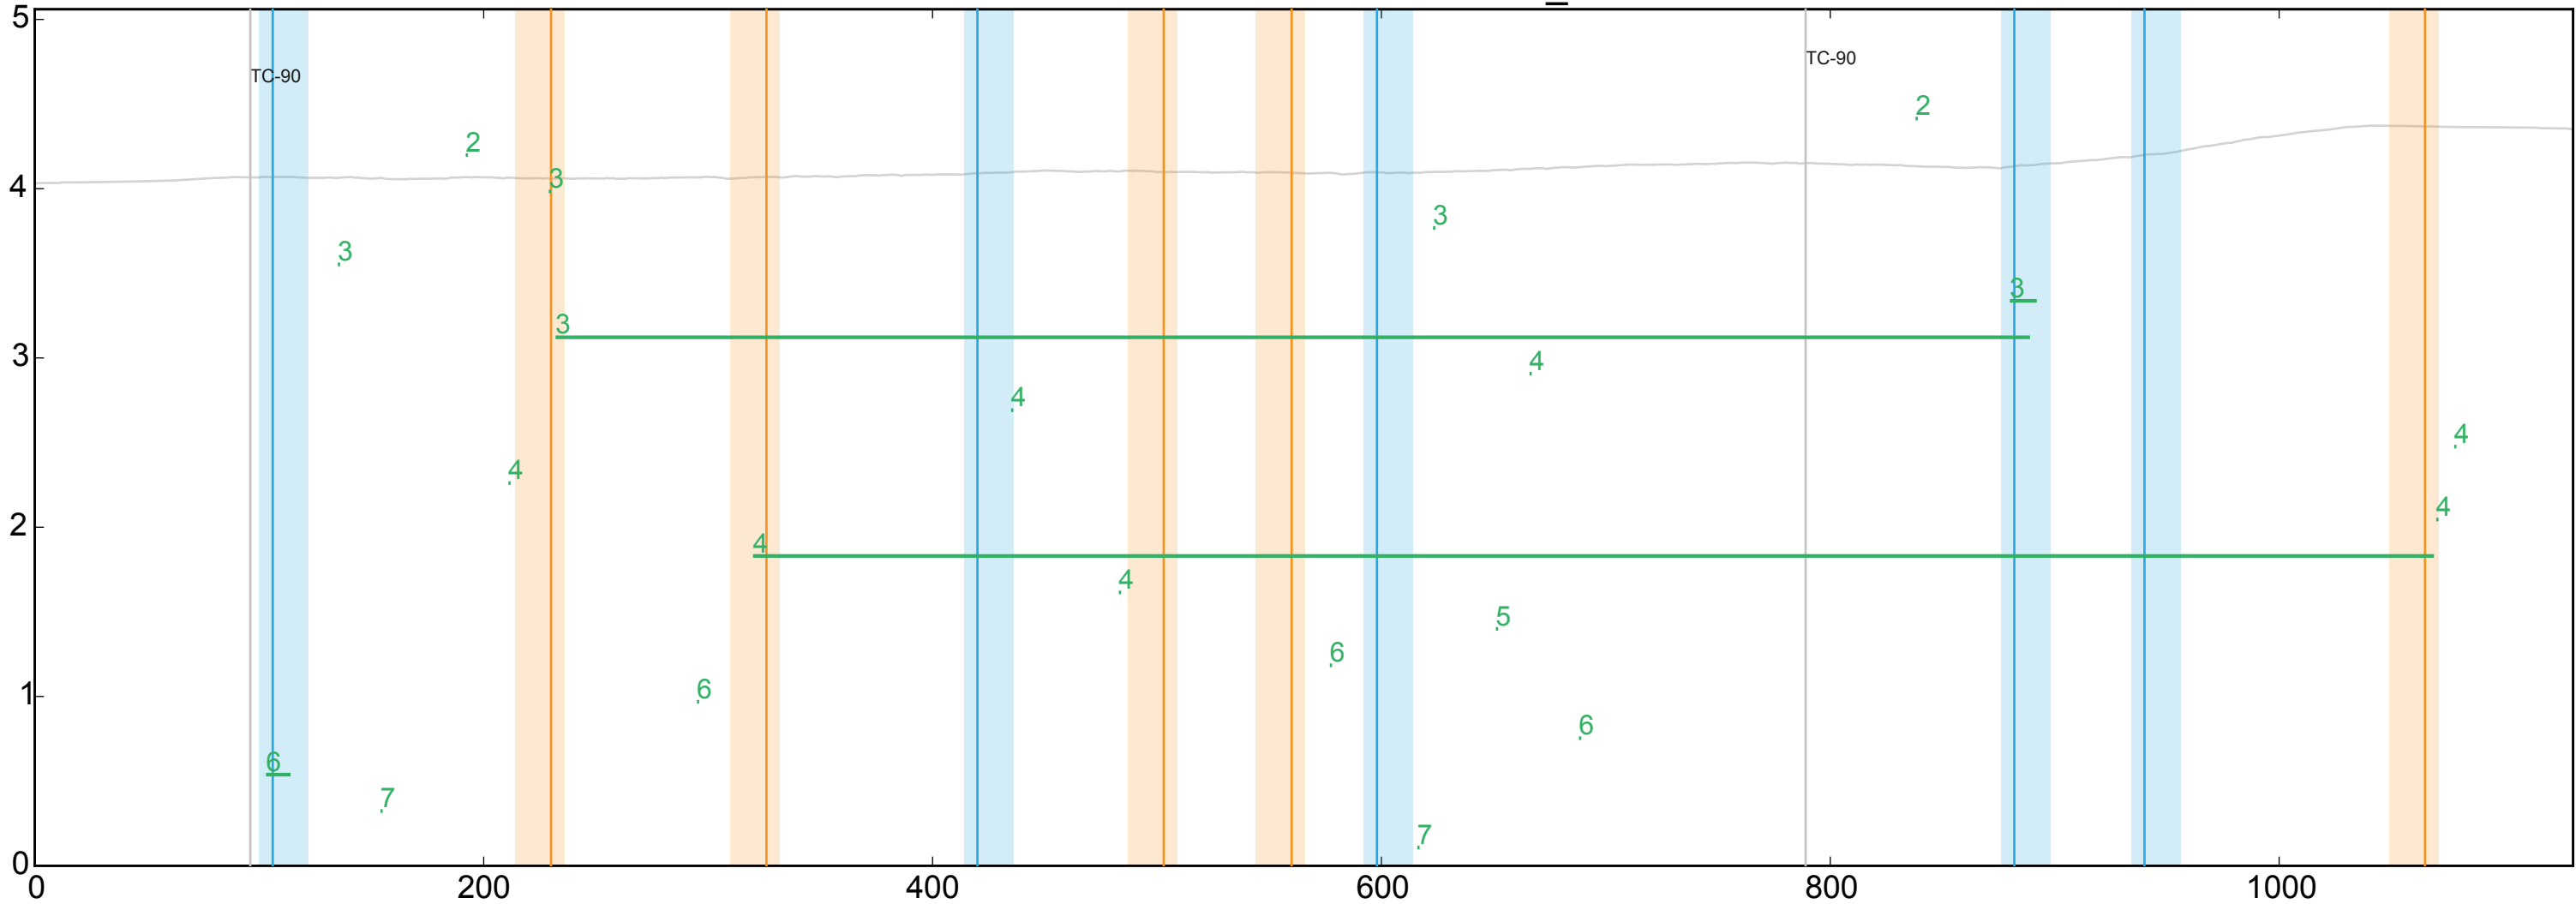

Mutant ENSDARG00000038188\_15

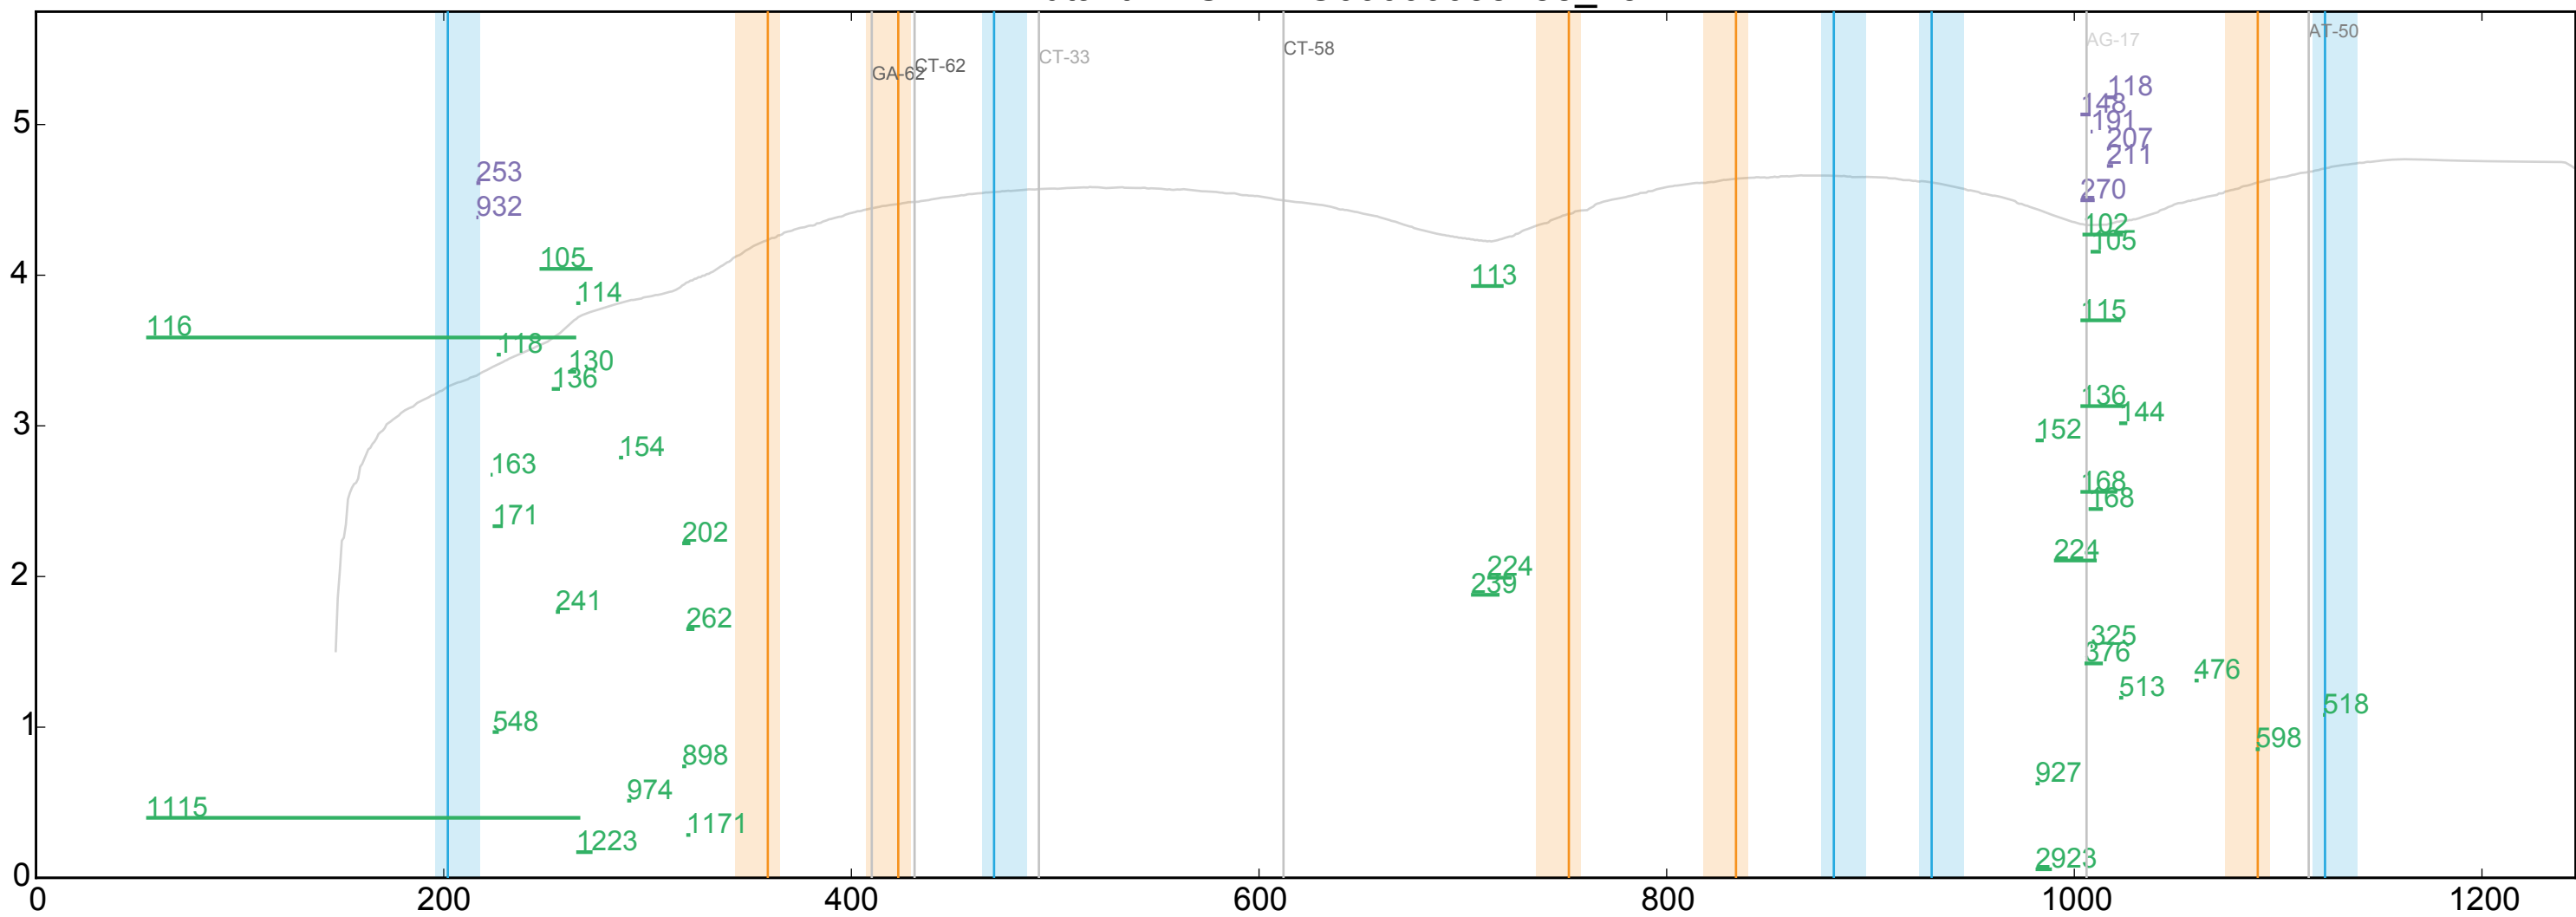

WT ENSDARG00000038188\_15

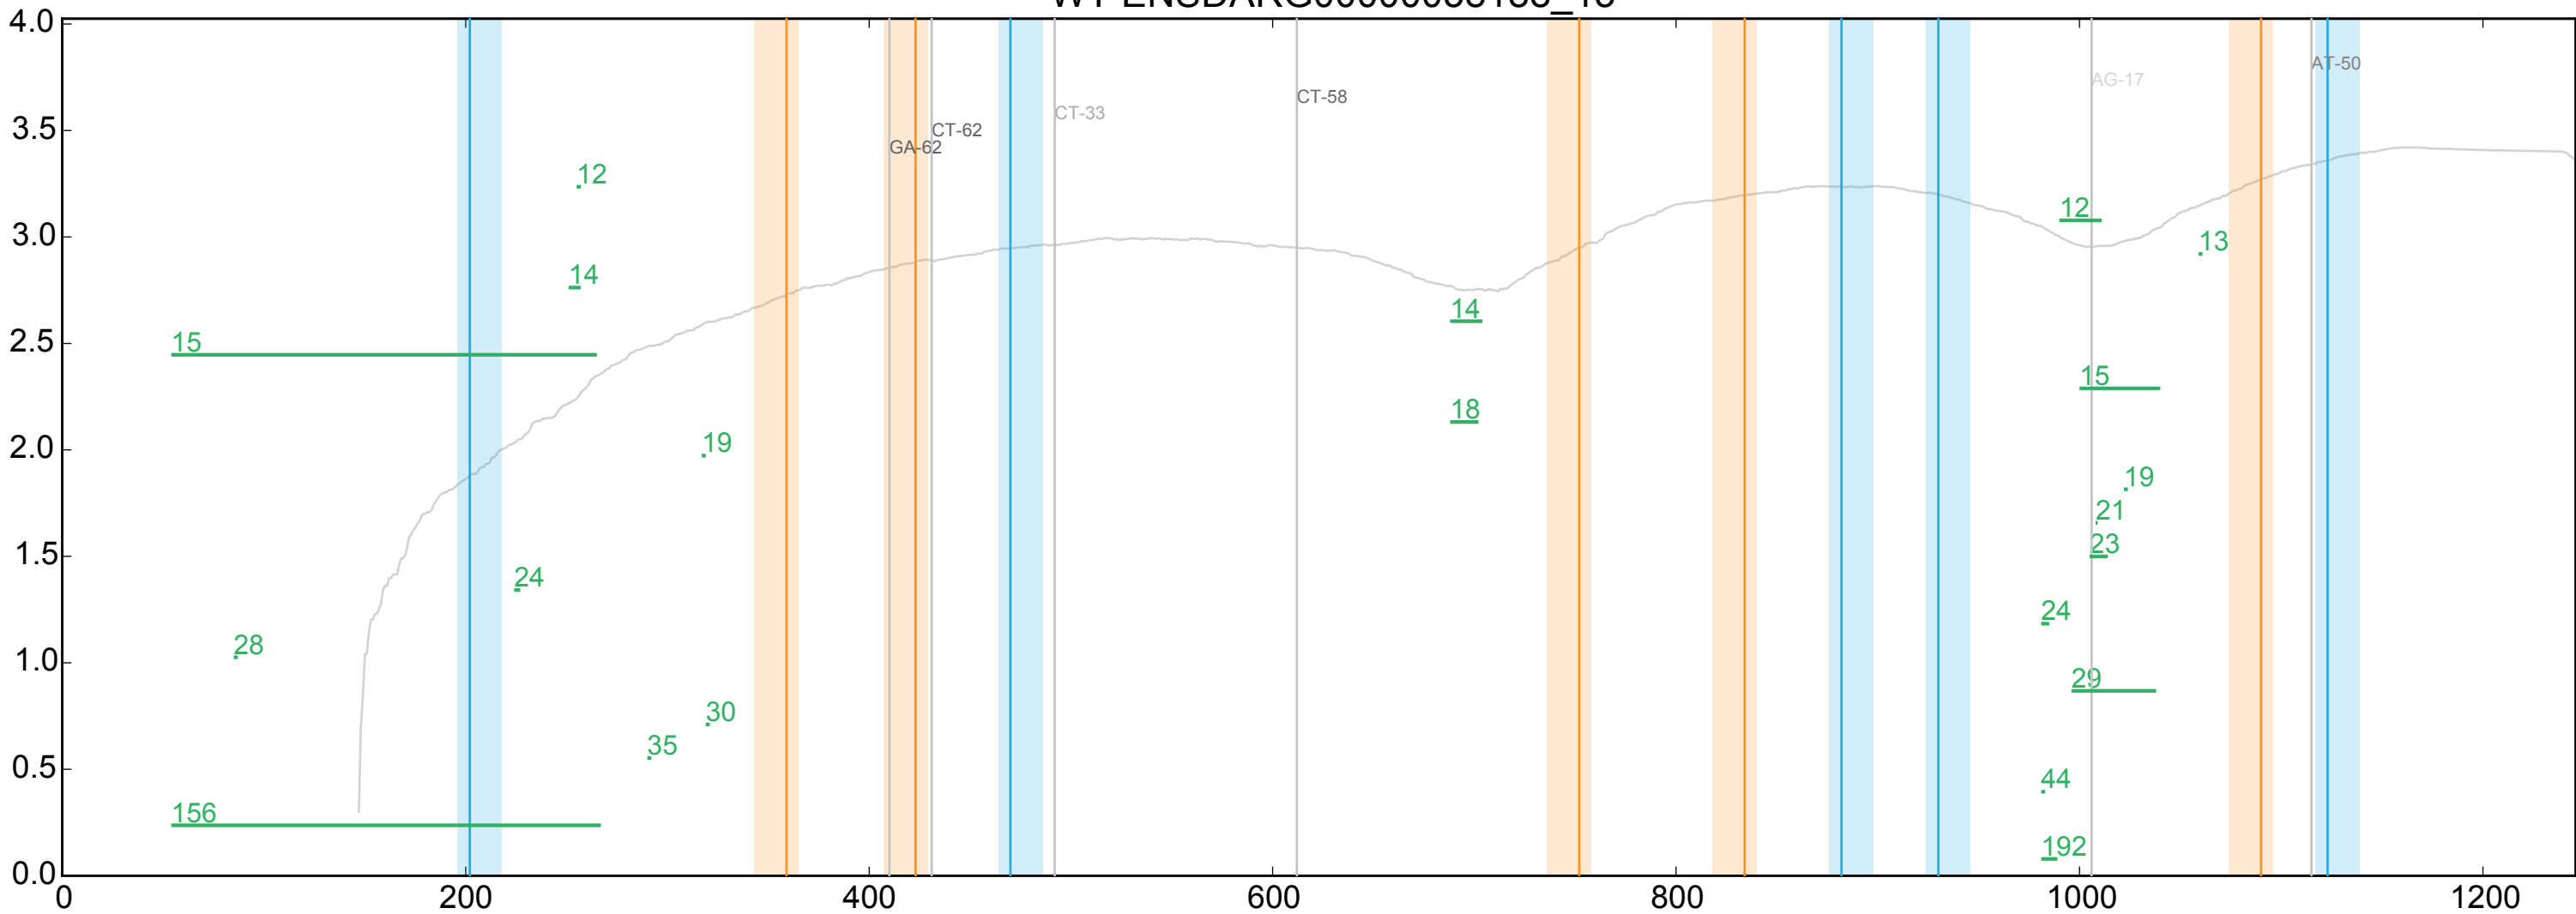

Mutant ENSDARG00000060073\_17

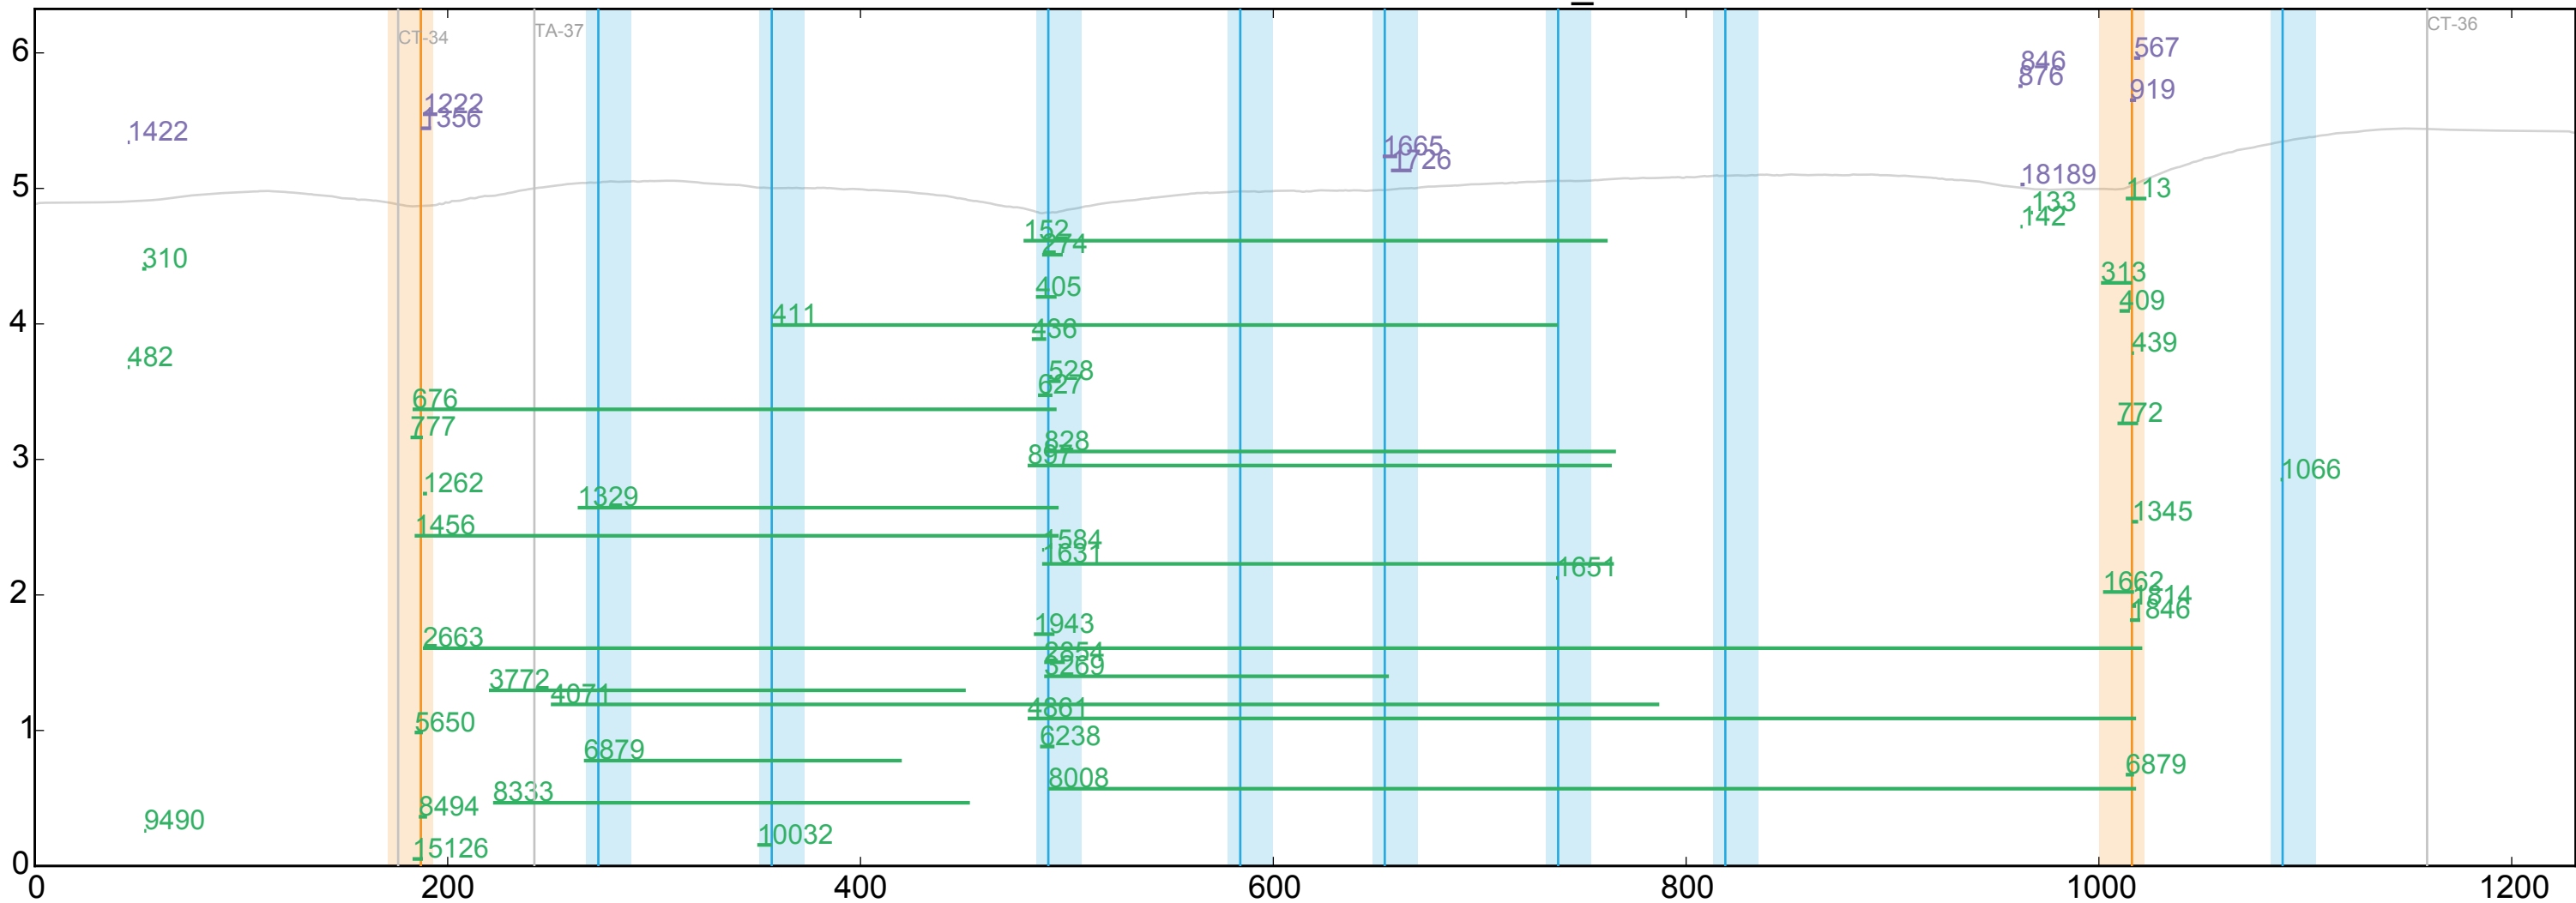

WT ENSDARG00000060073\_17

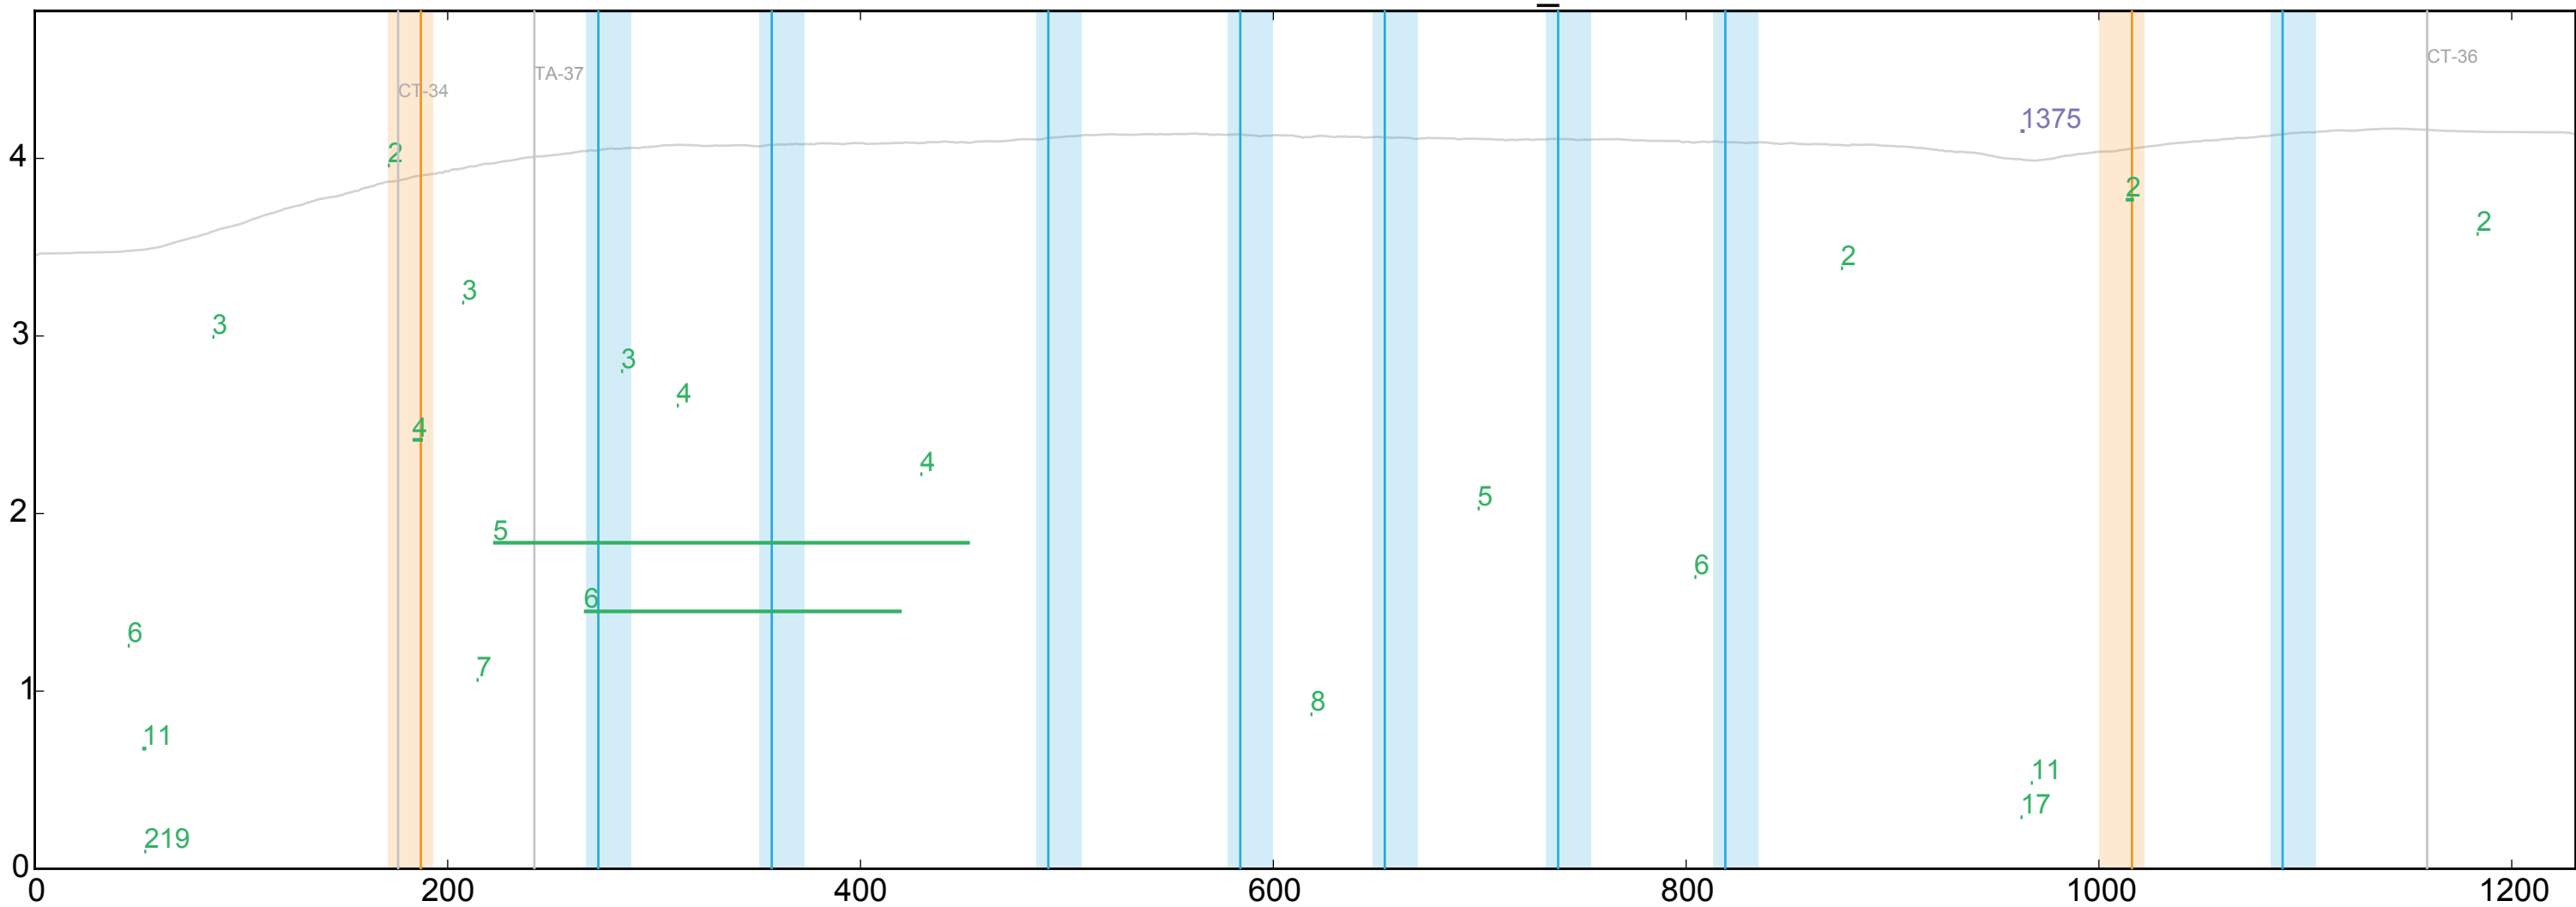



Mutant ENSDARG0000004473\_5

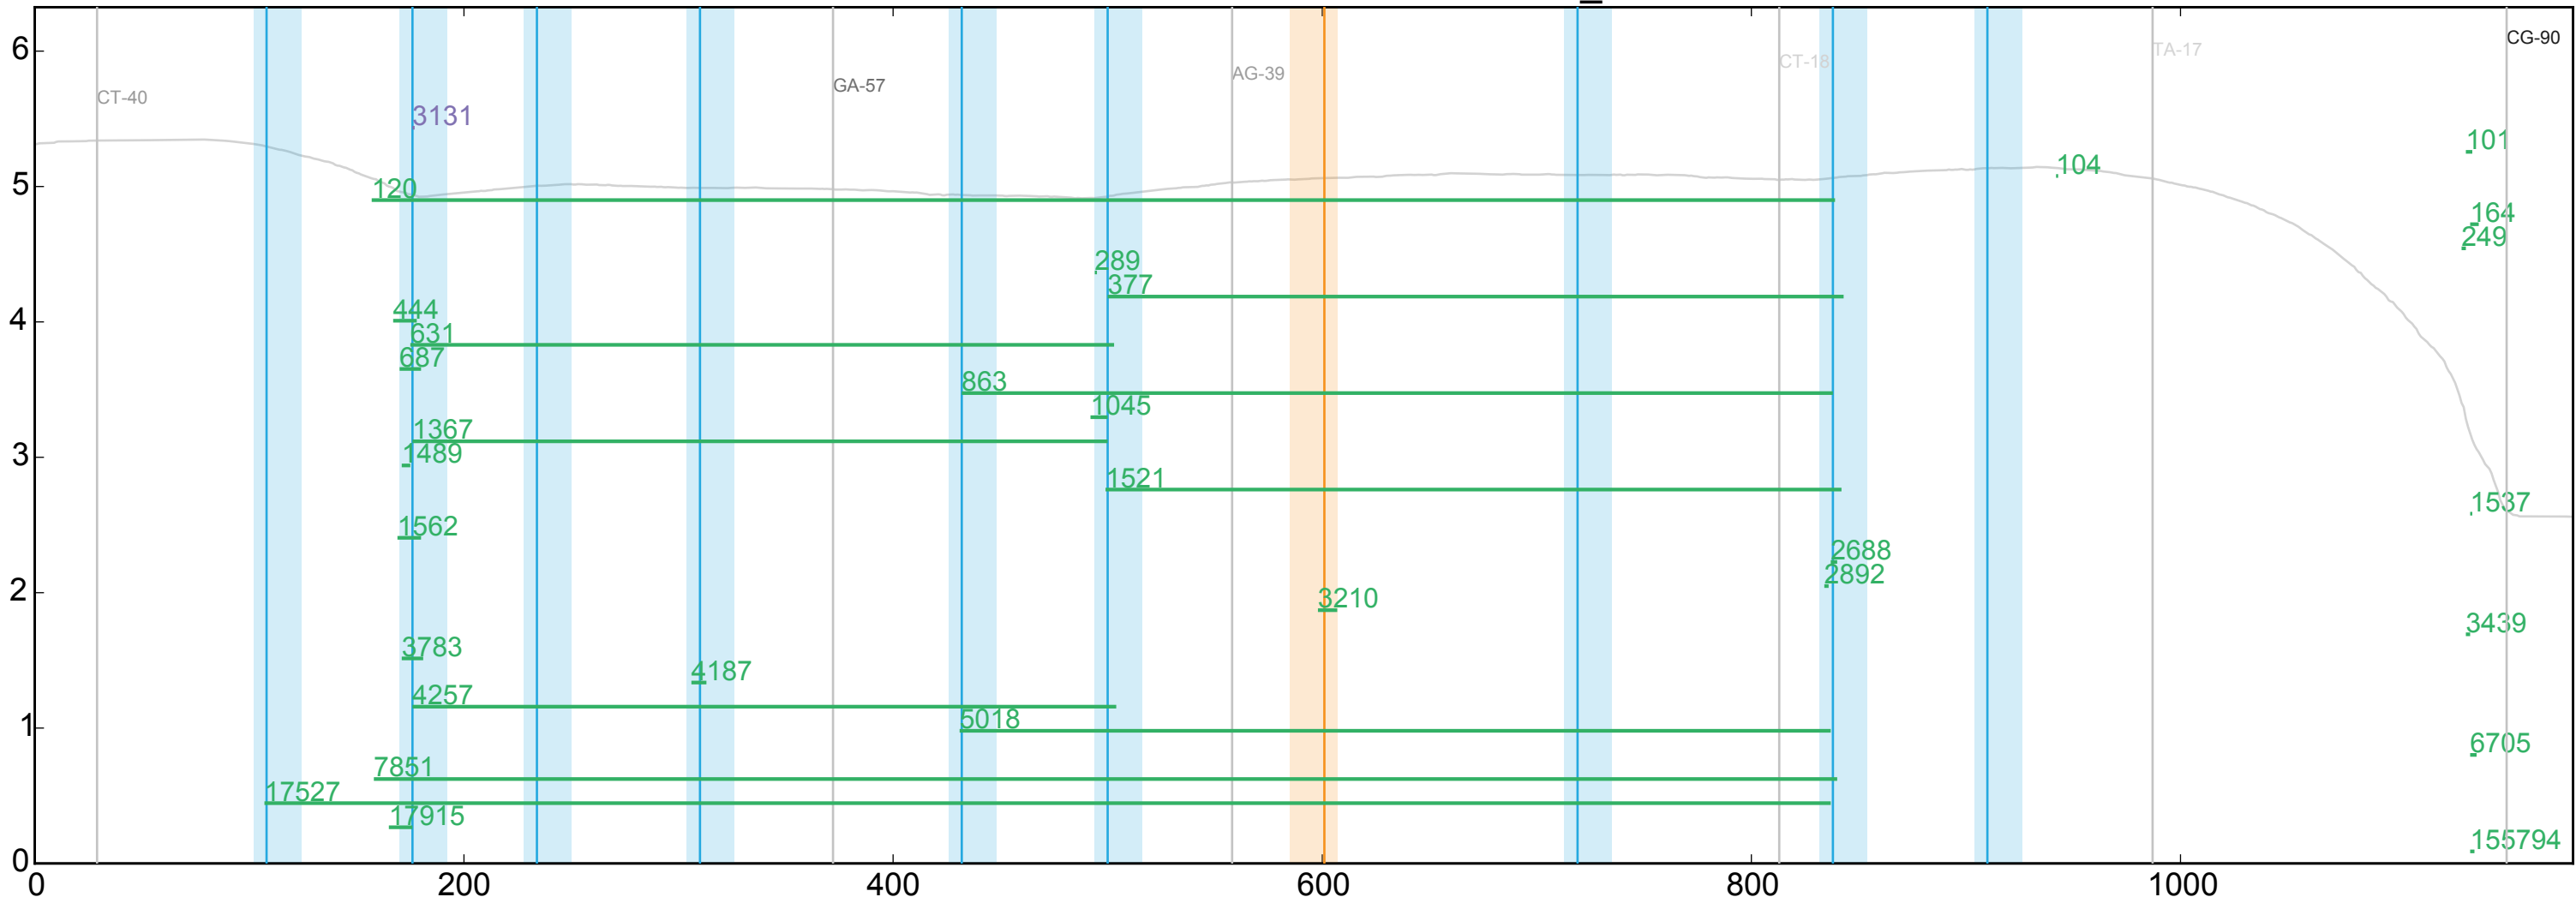

WT ENSDARG0000004473\_5

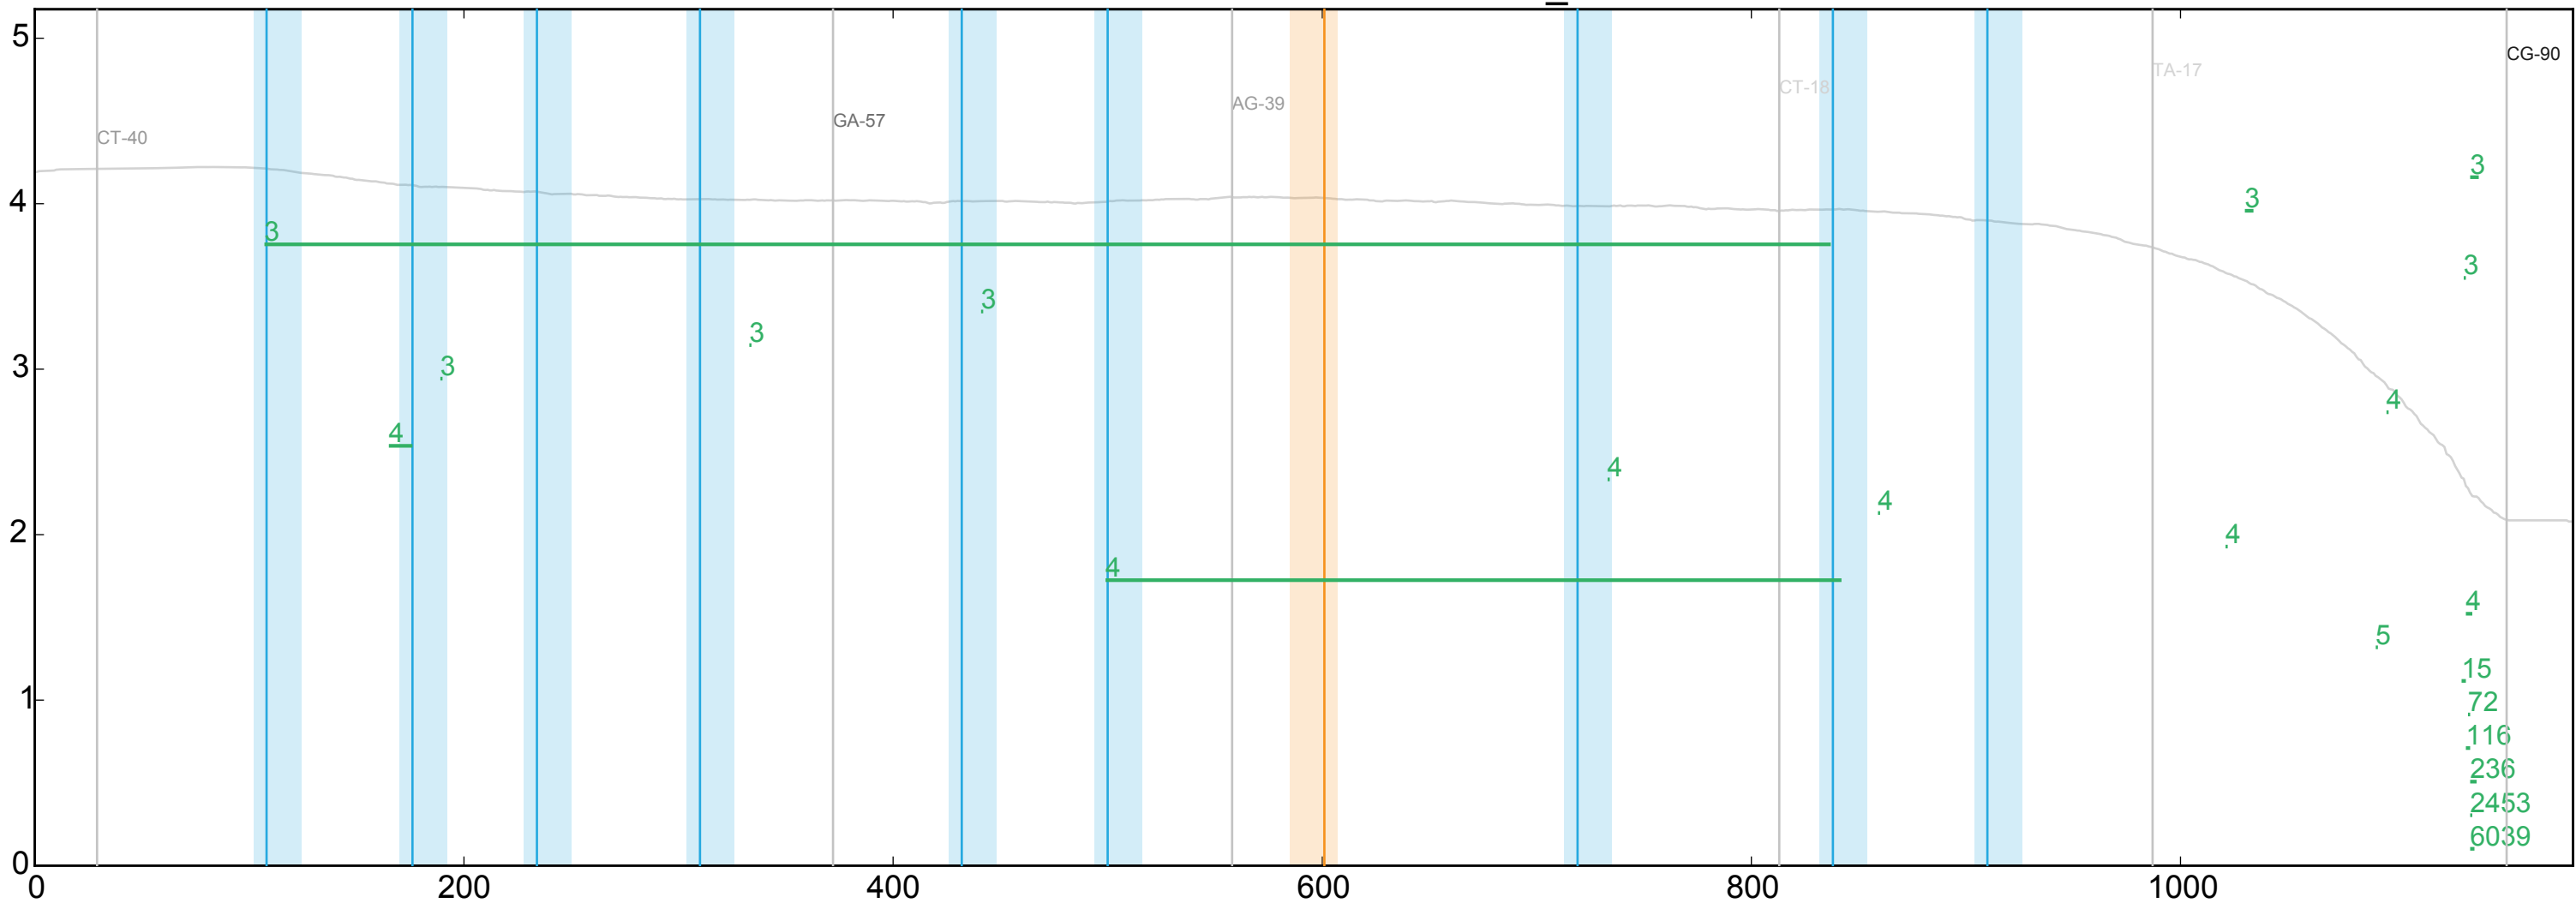



Mutant ENSDARG00000074397\_1

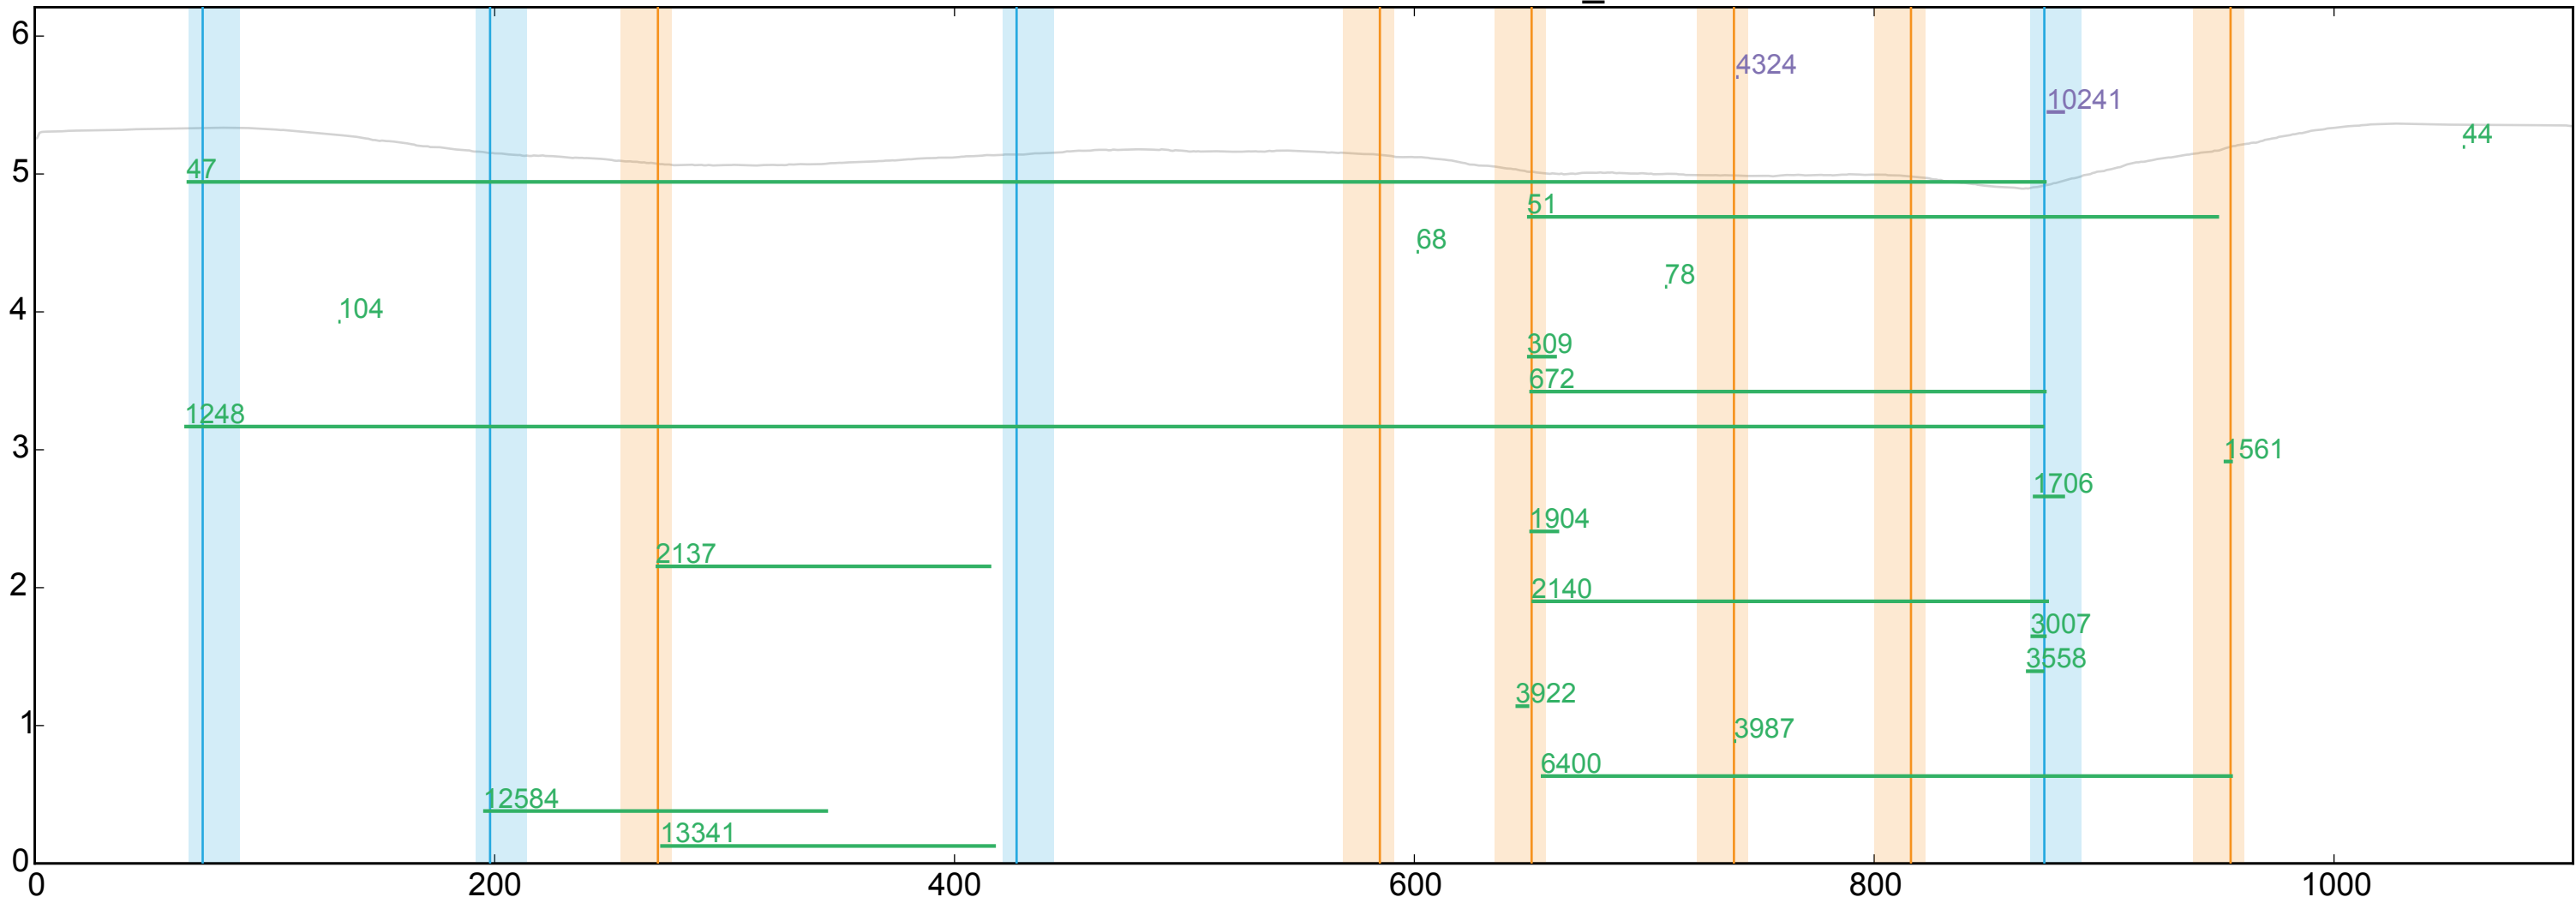

WT ENSDARG00000074397\_1

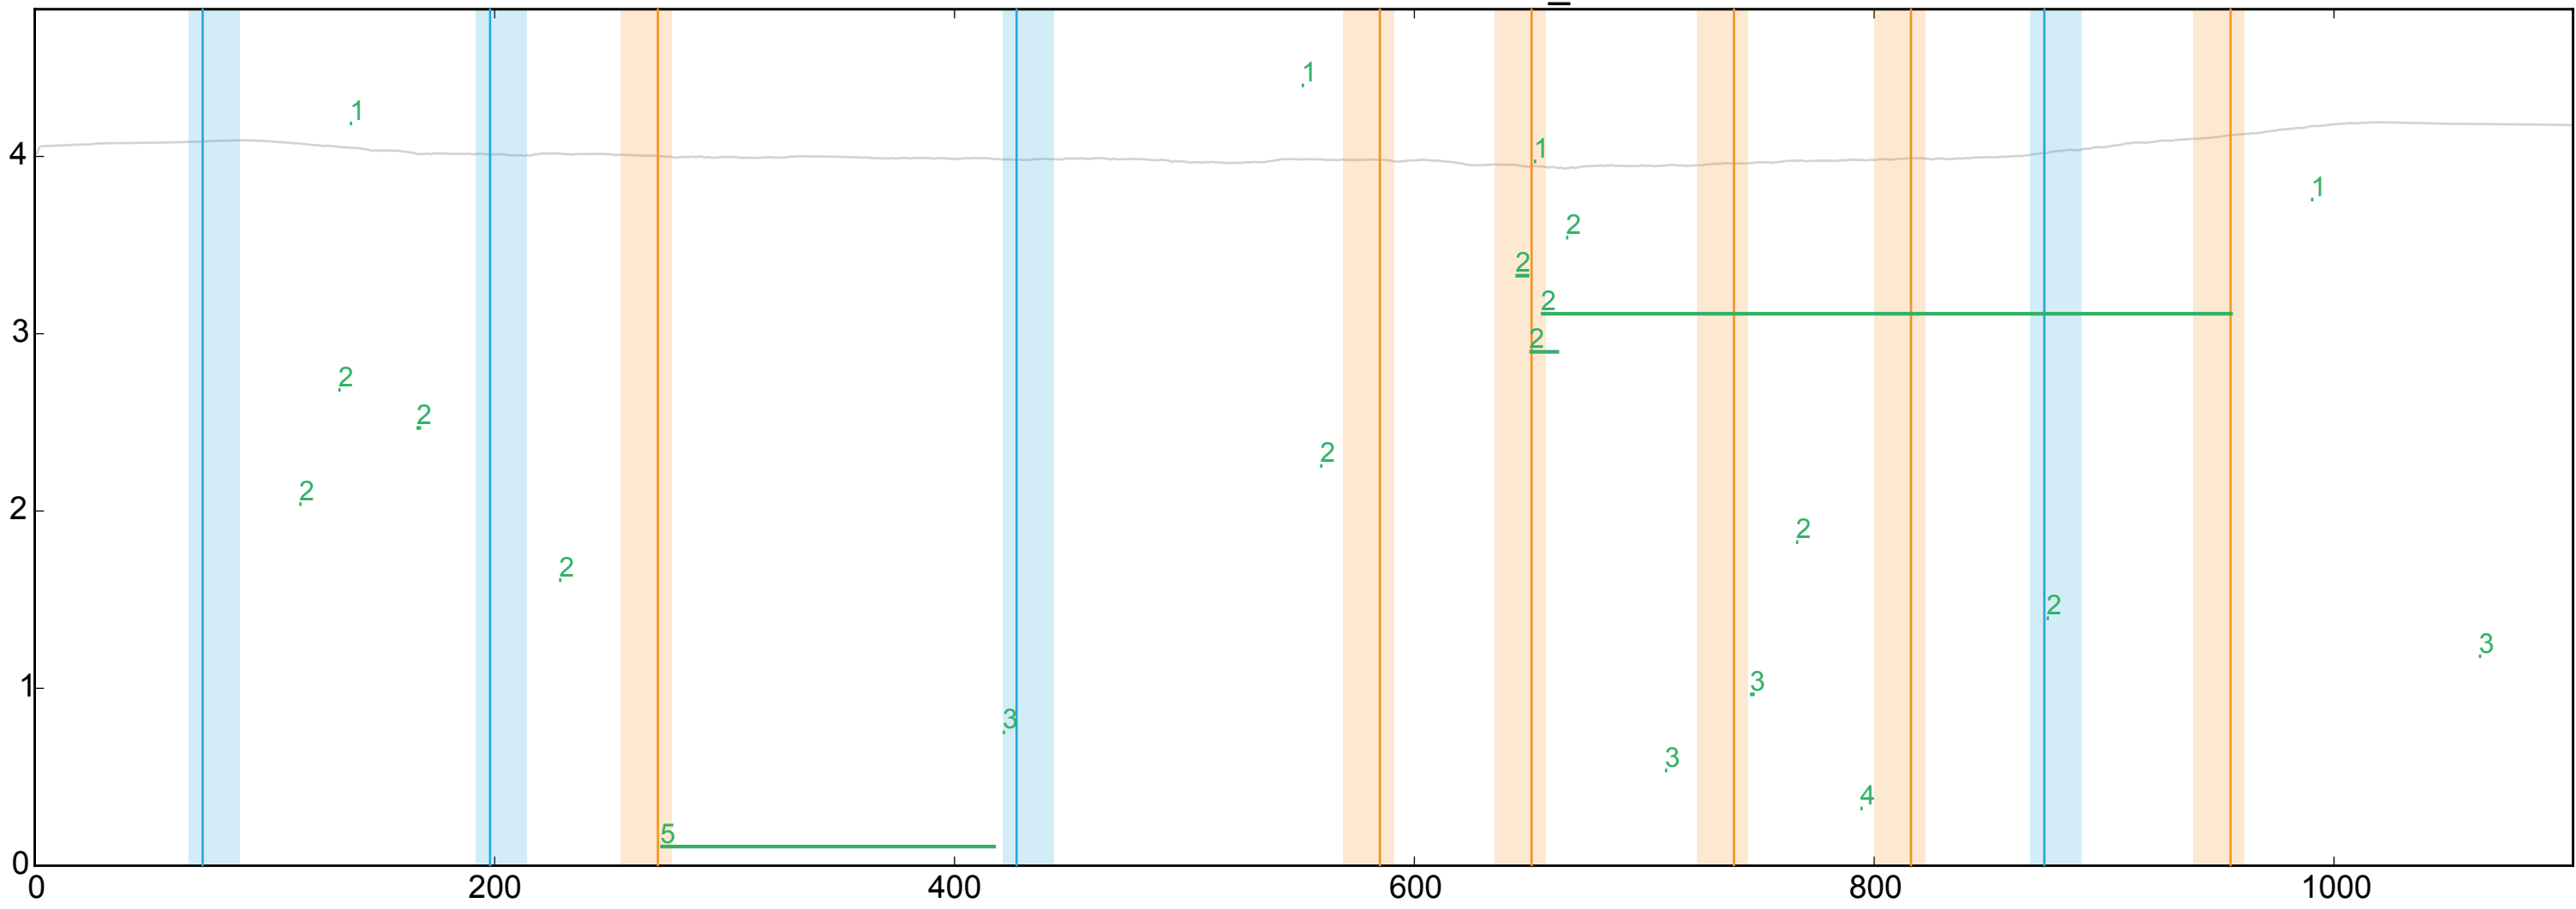

Mutant ENSDARG00000063719\_8

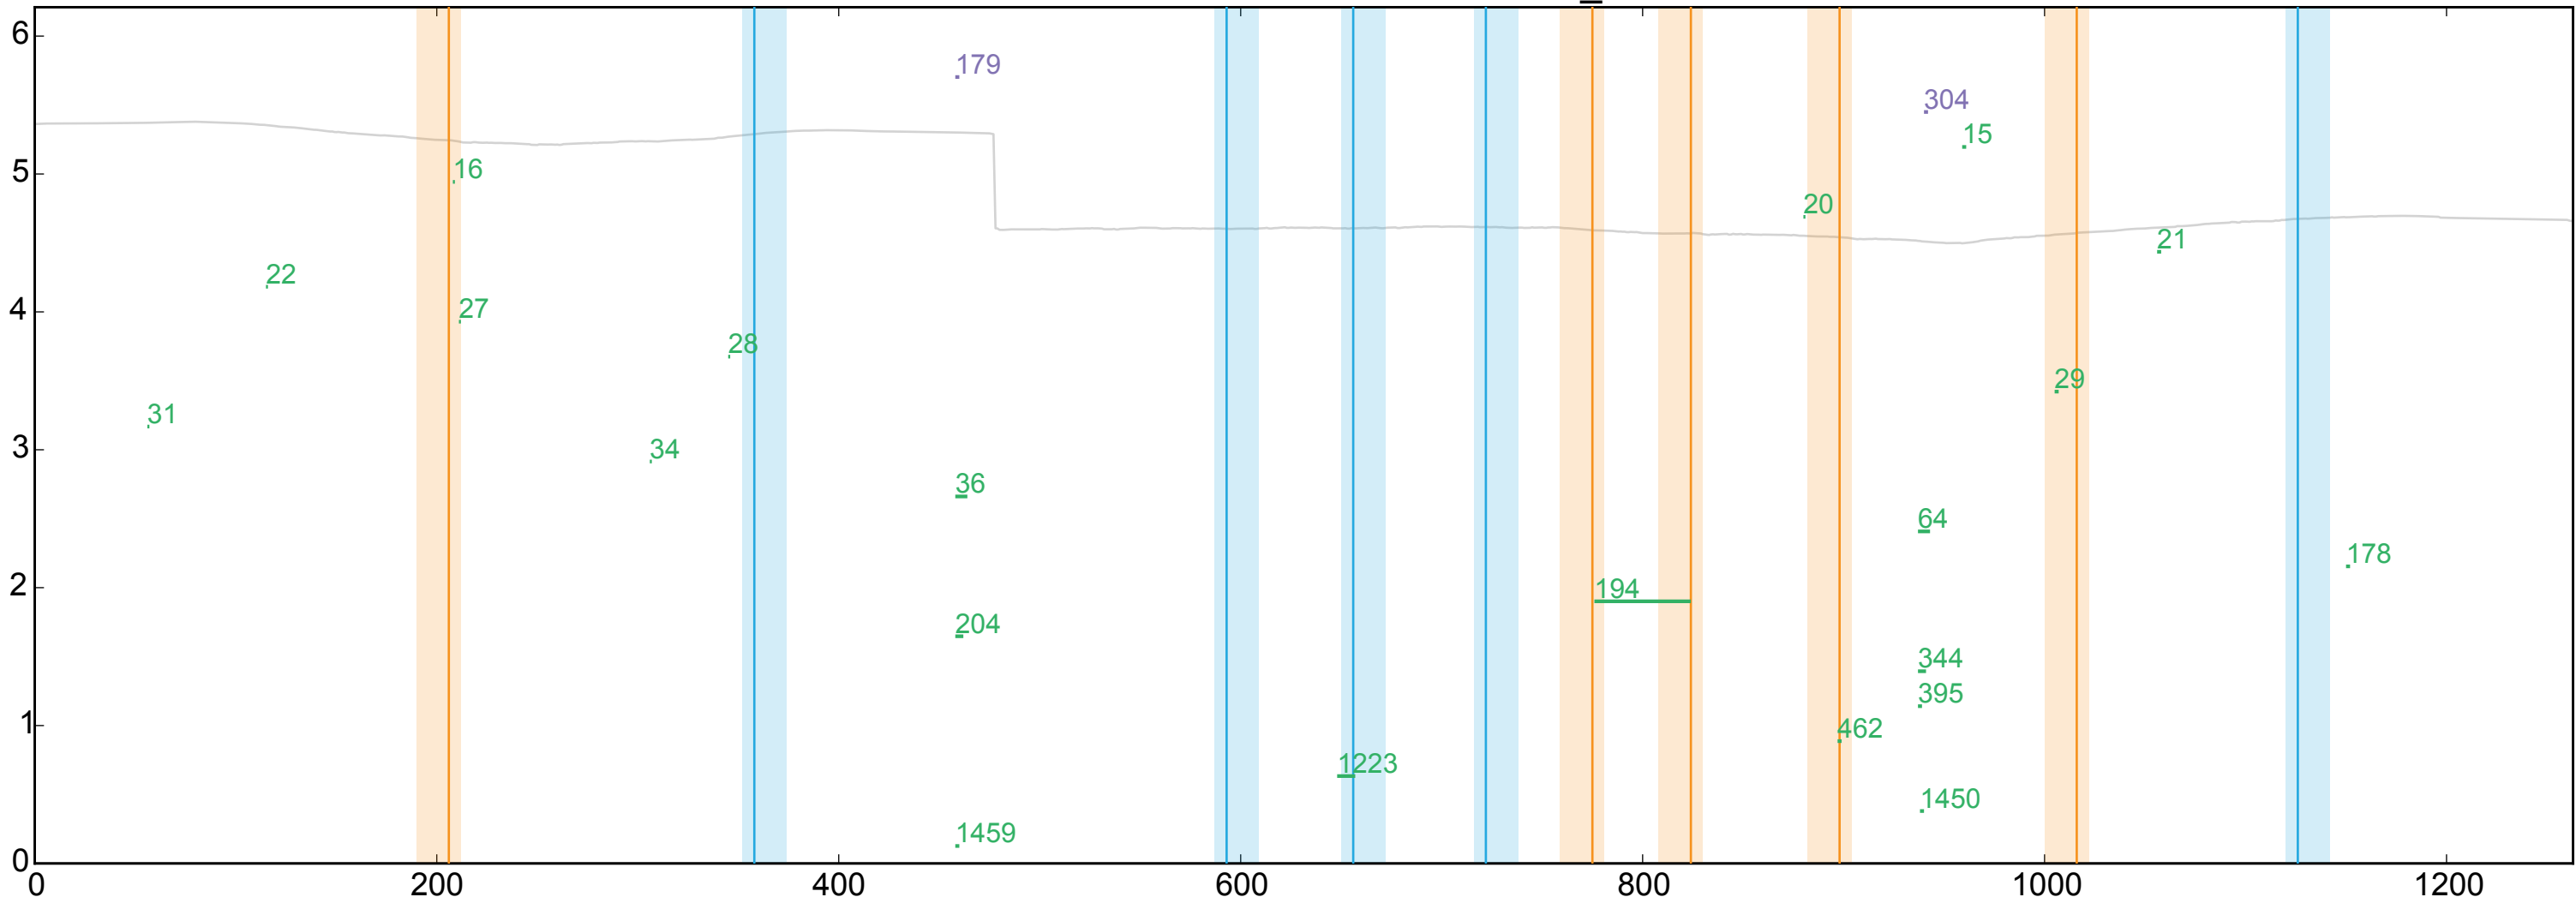

WT ENSDARG00000063719\_8

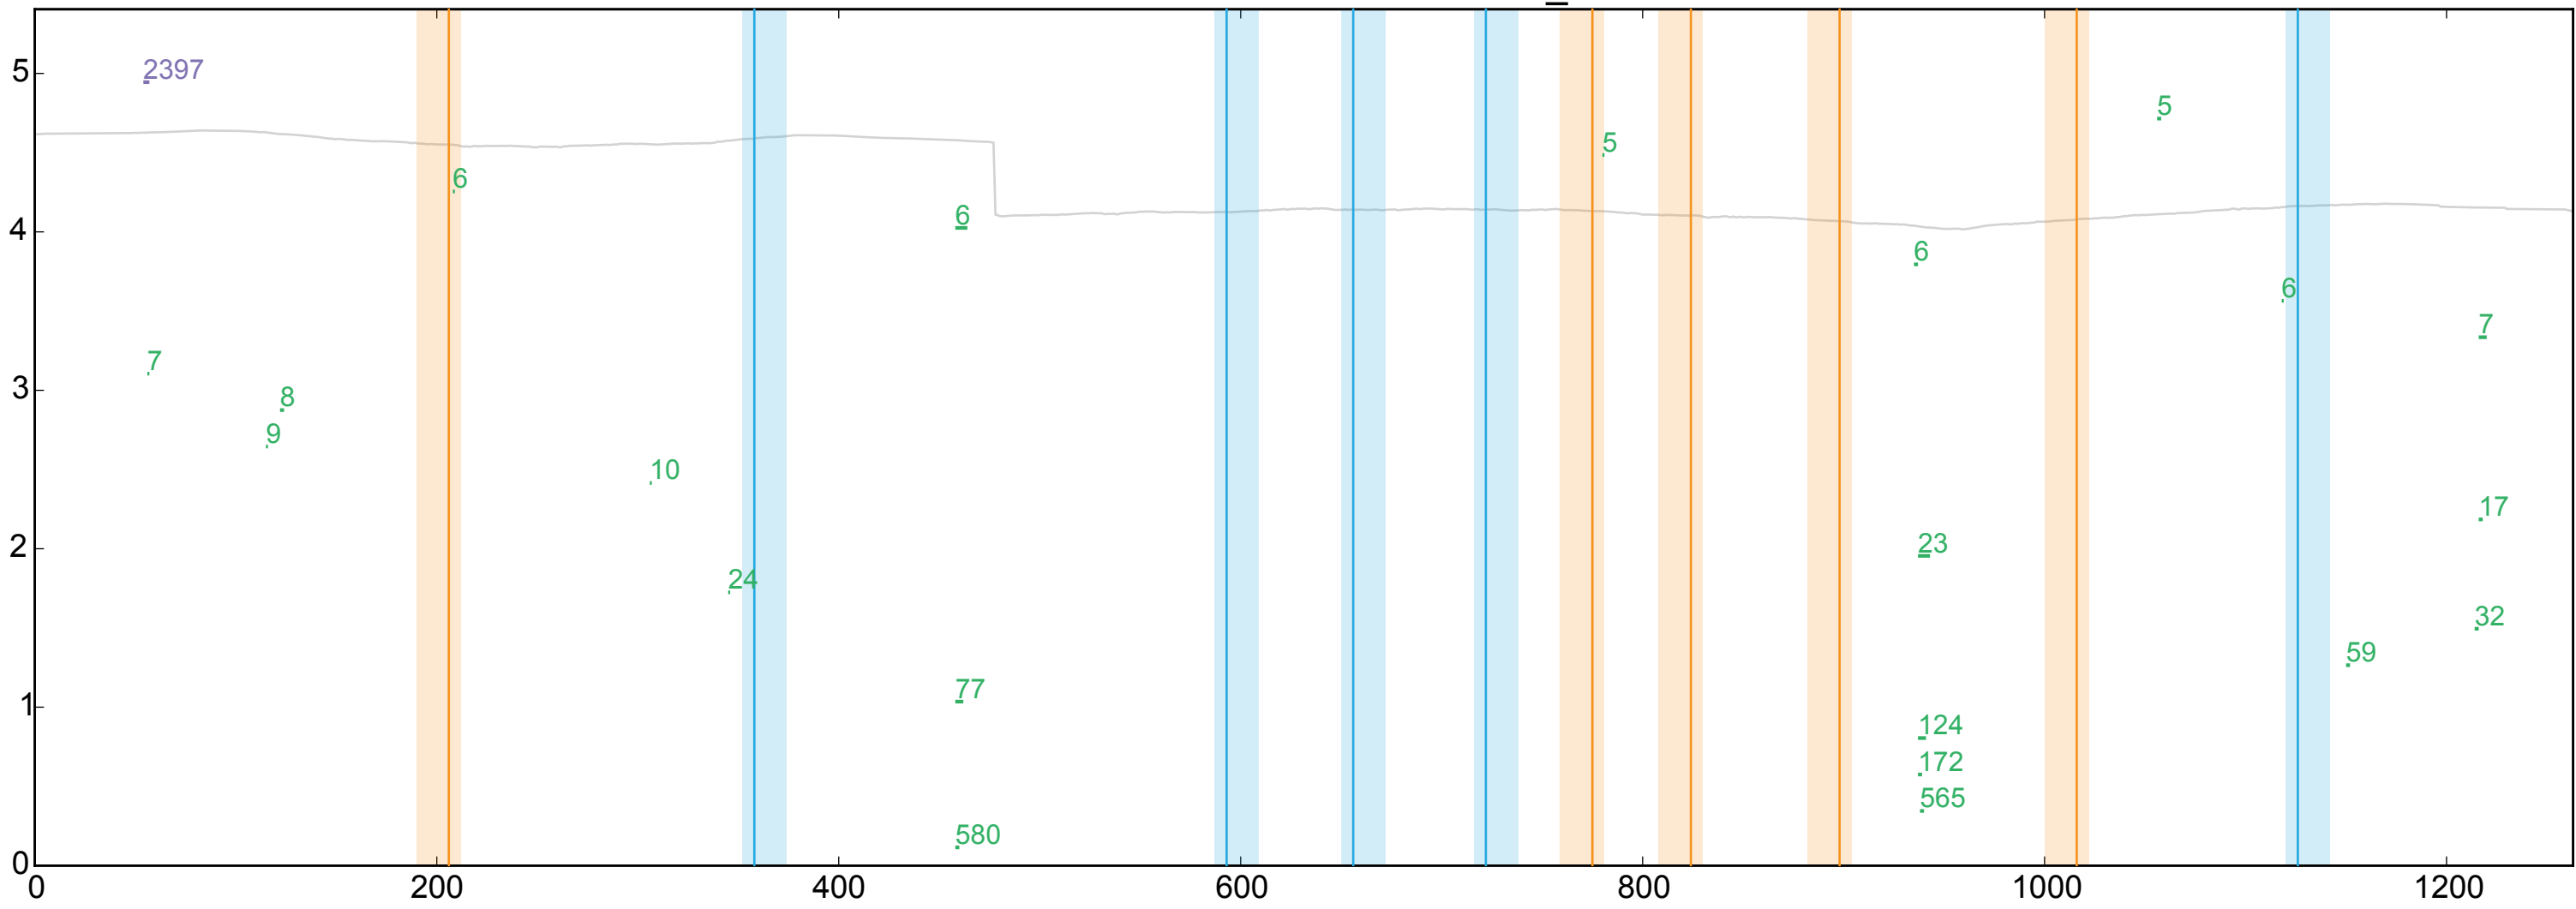



Mutant ENSDARG00000045051\_0

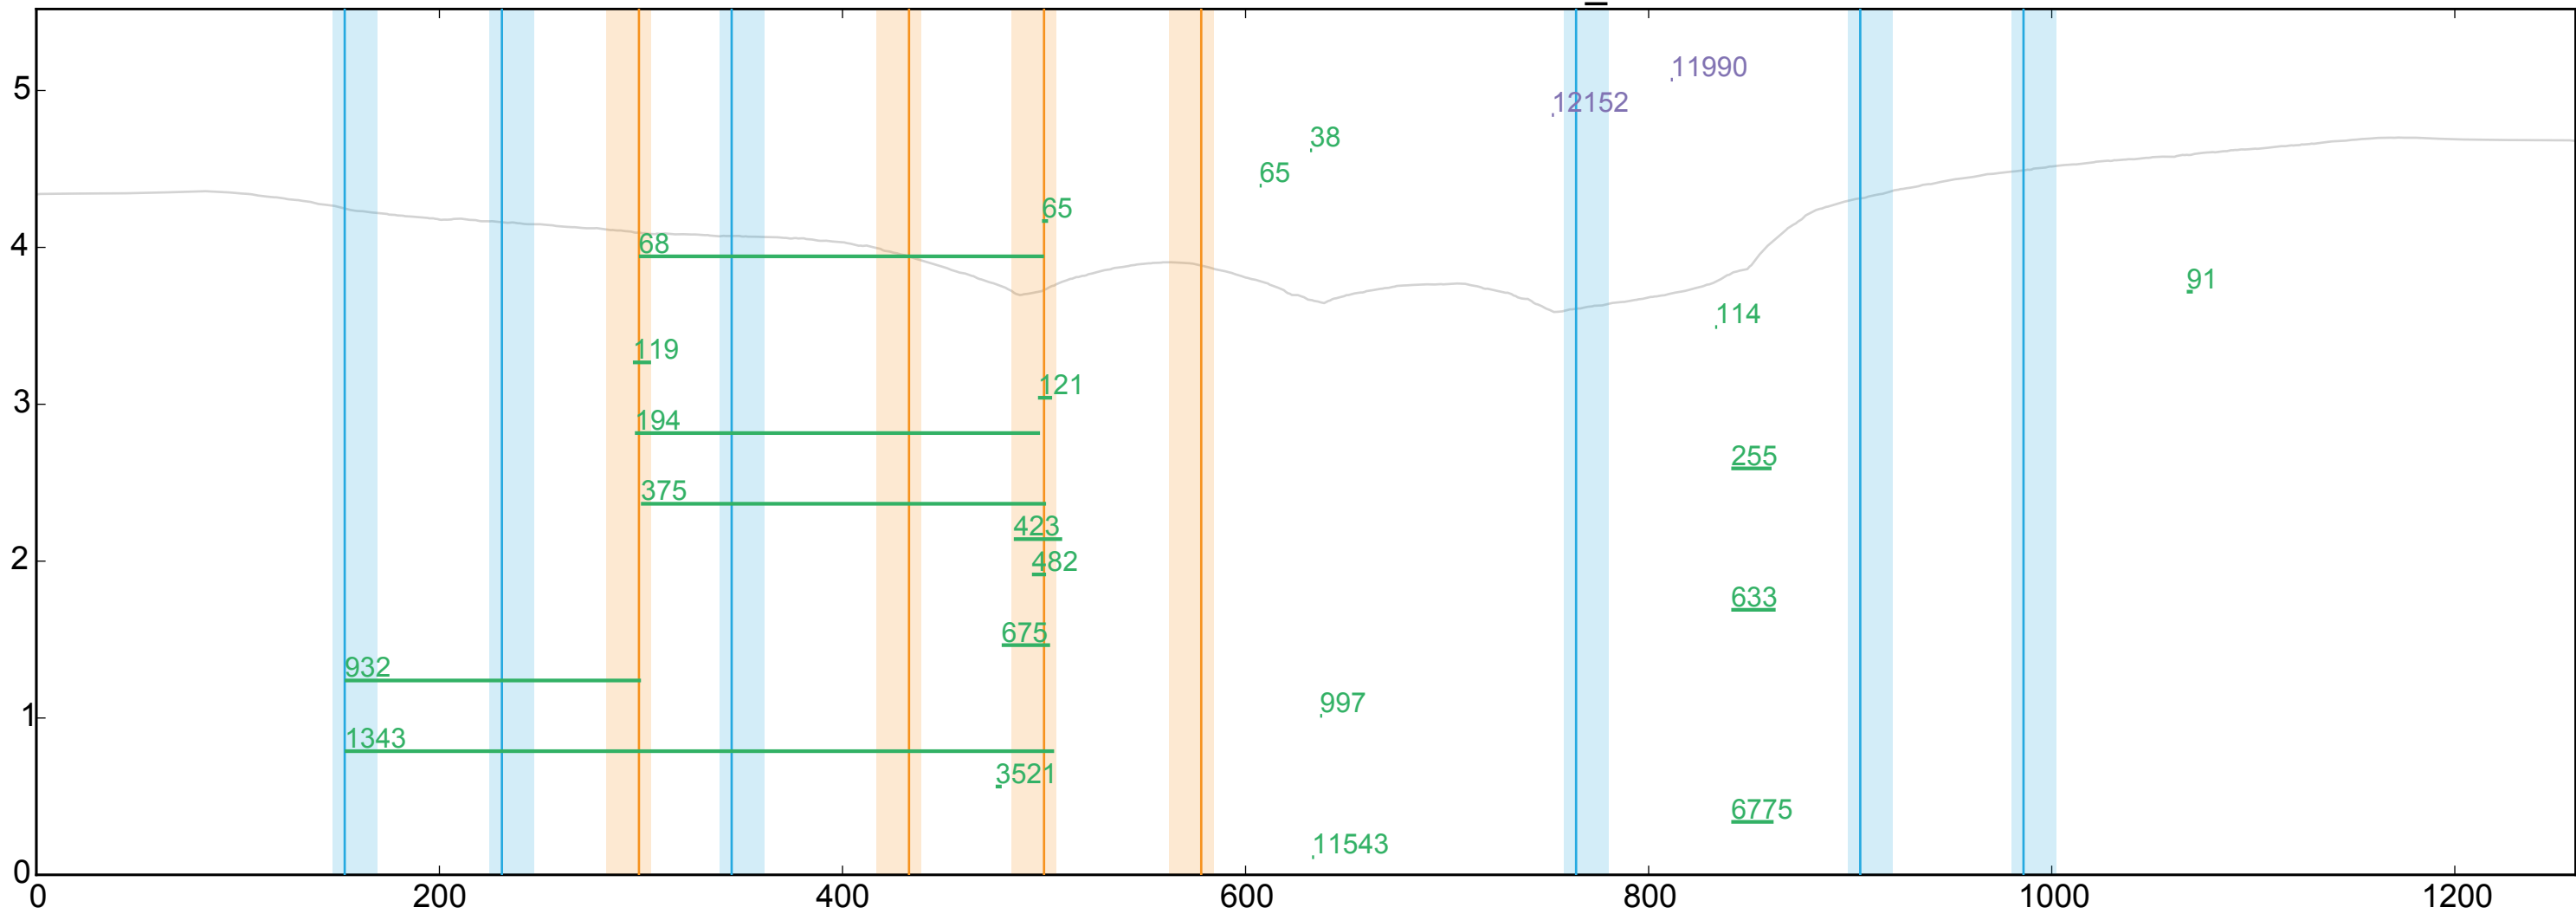

WT ENSDARG00000045051\_0

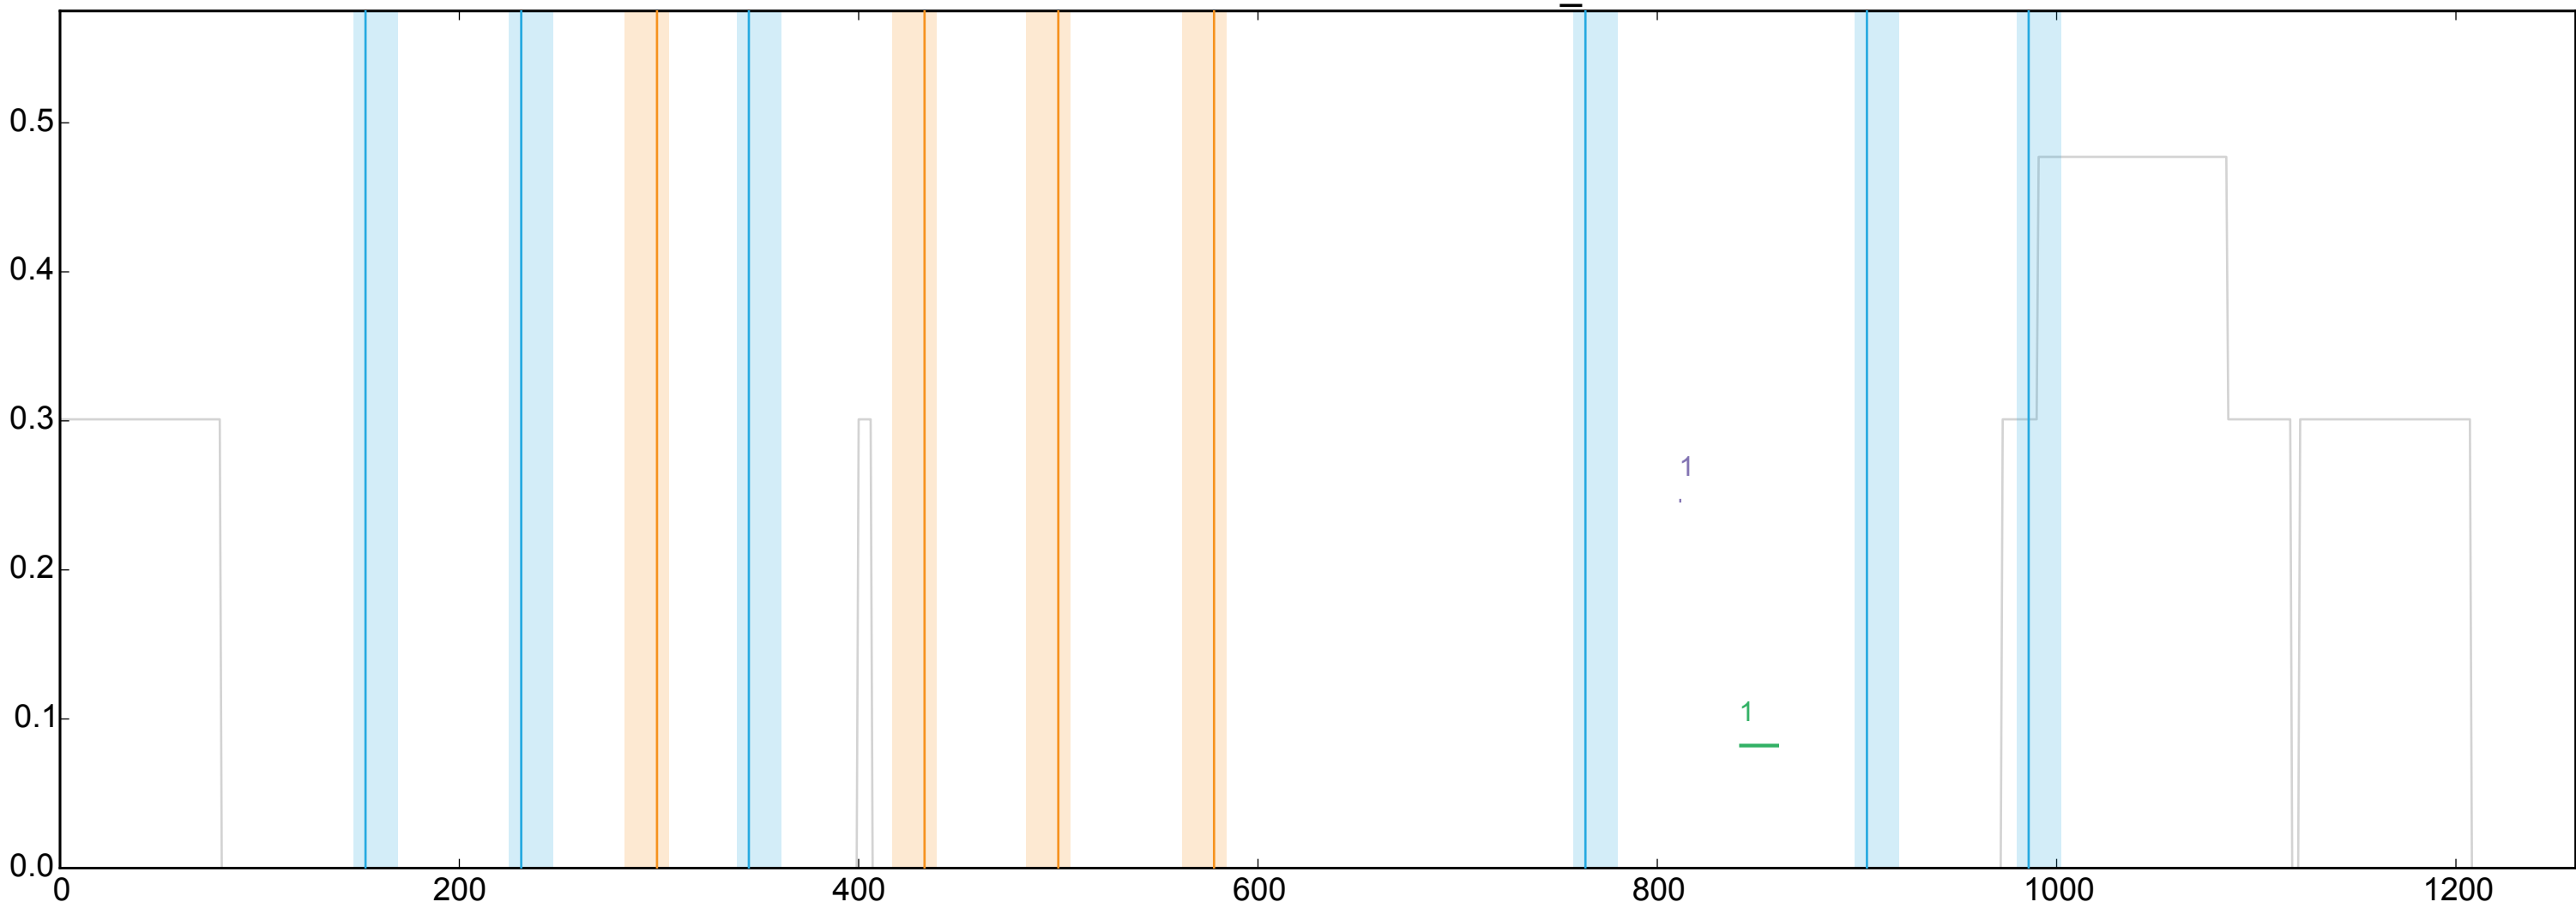

Mutant ENSDARG00000078582\_31

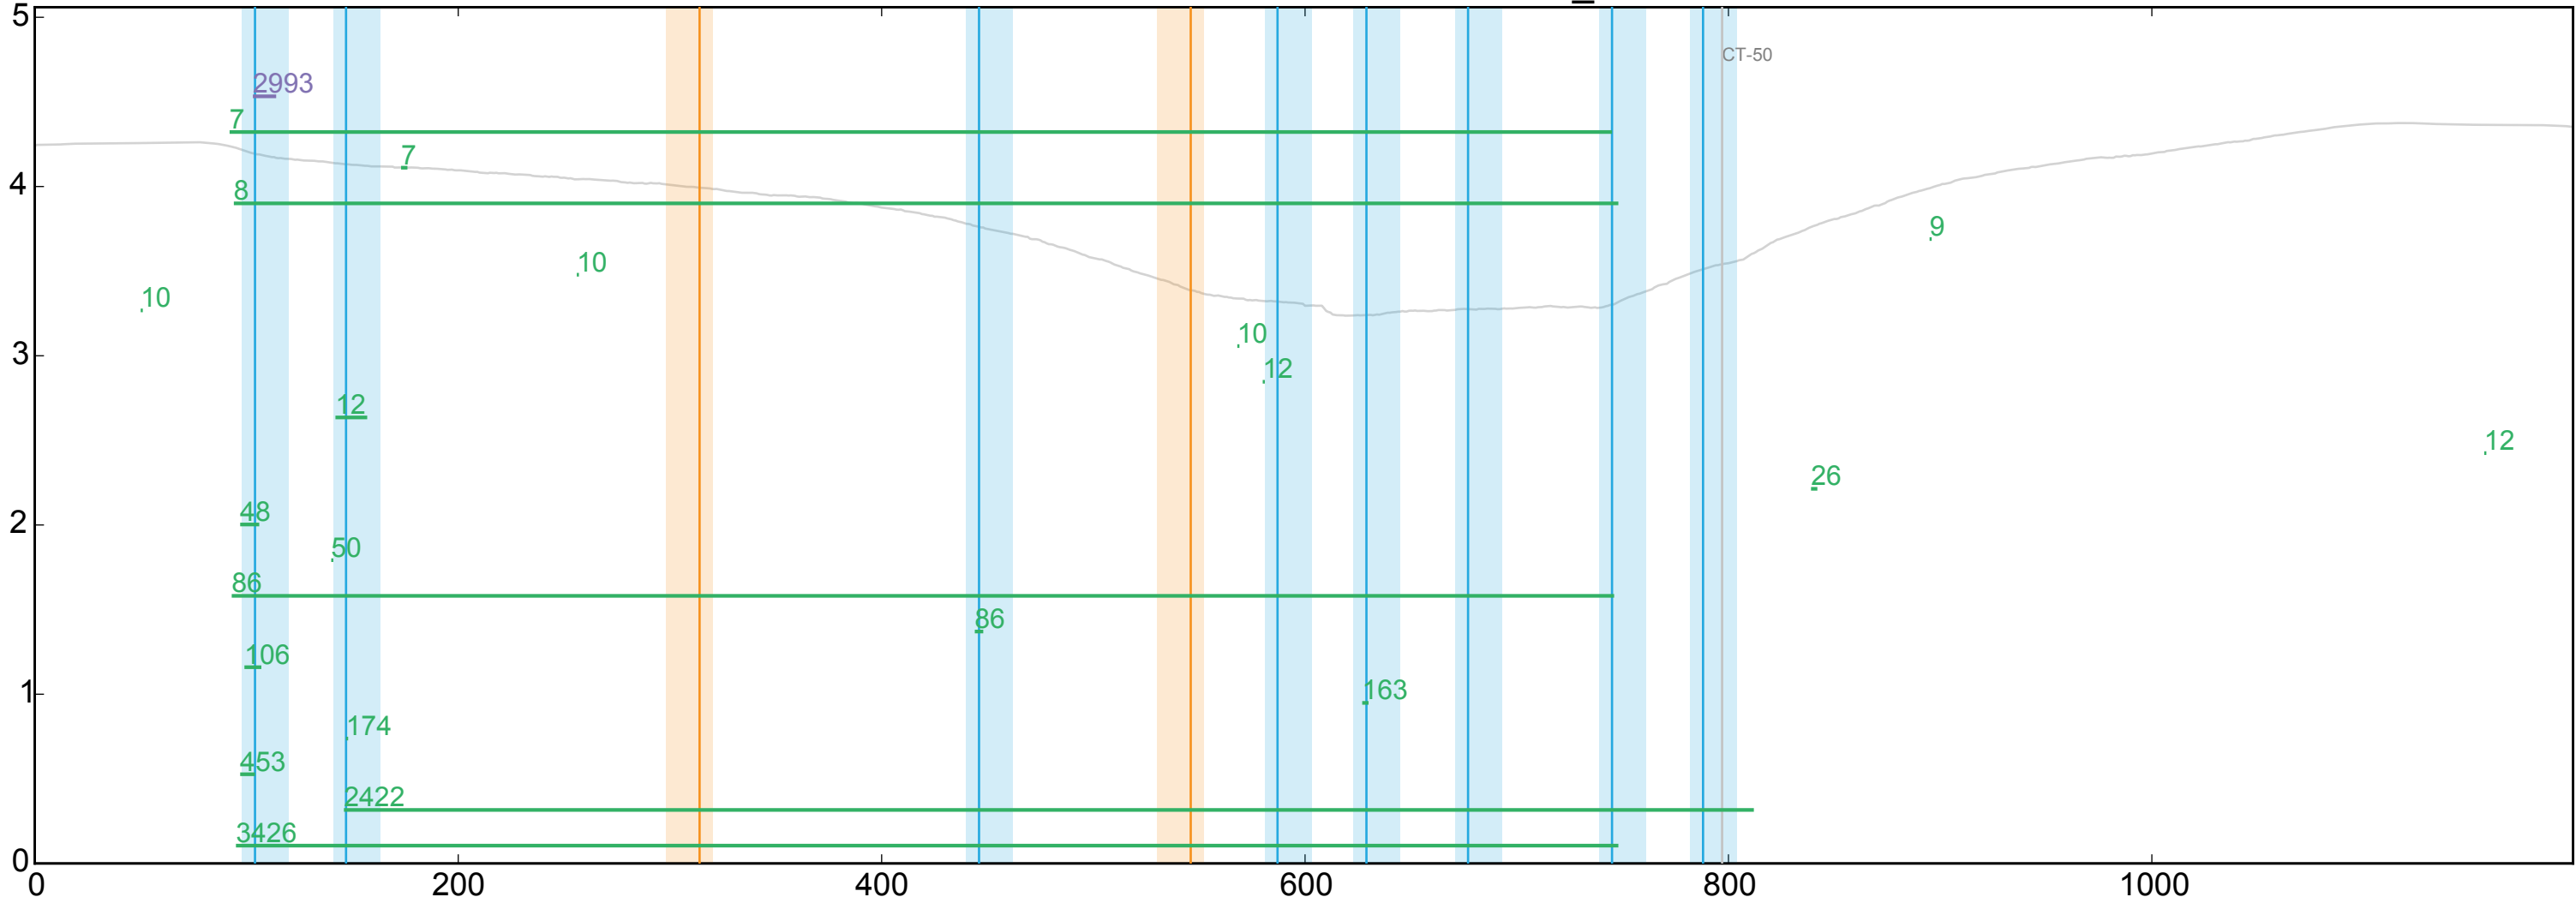

WT ENSDARG00000078582\_31

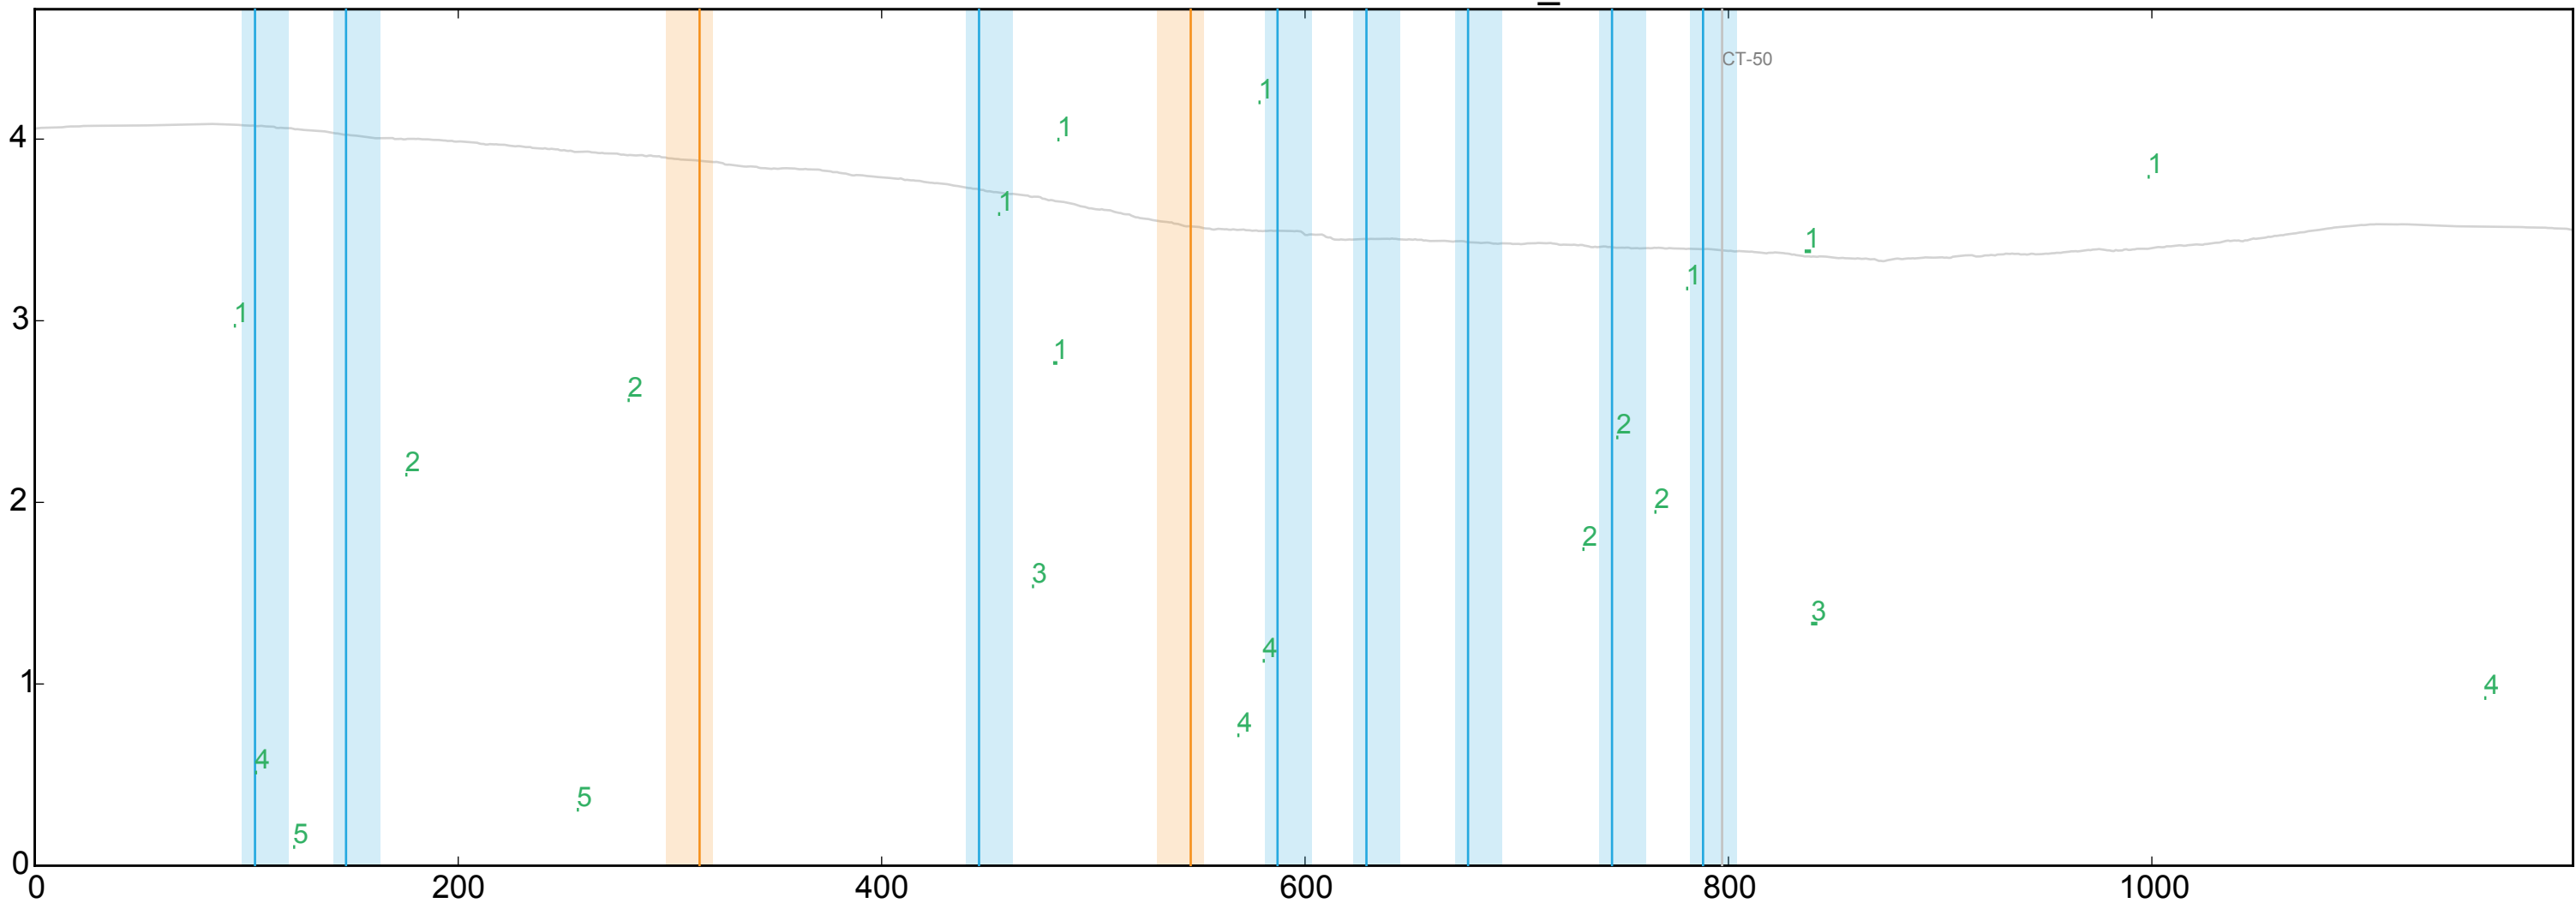

Mutant ENSDARG00000068912\_1

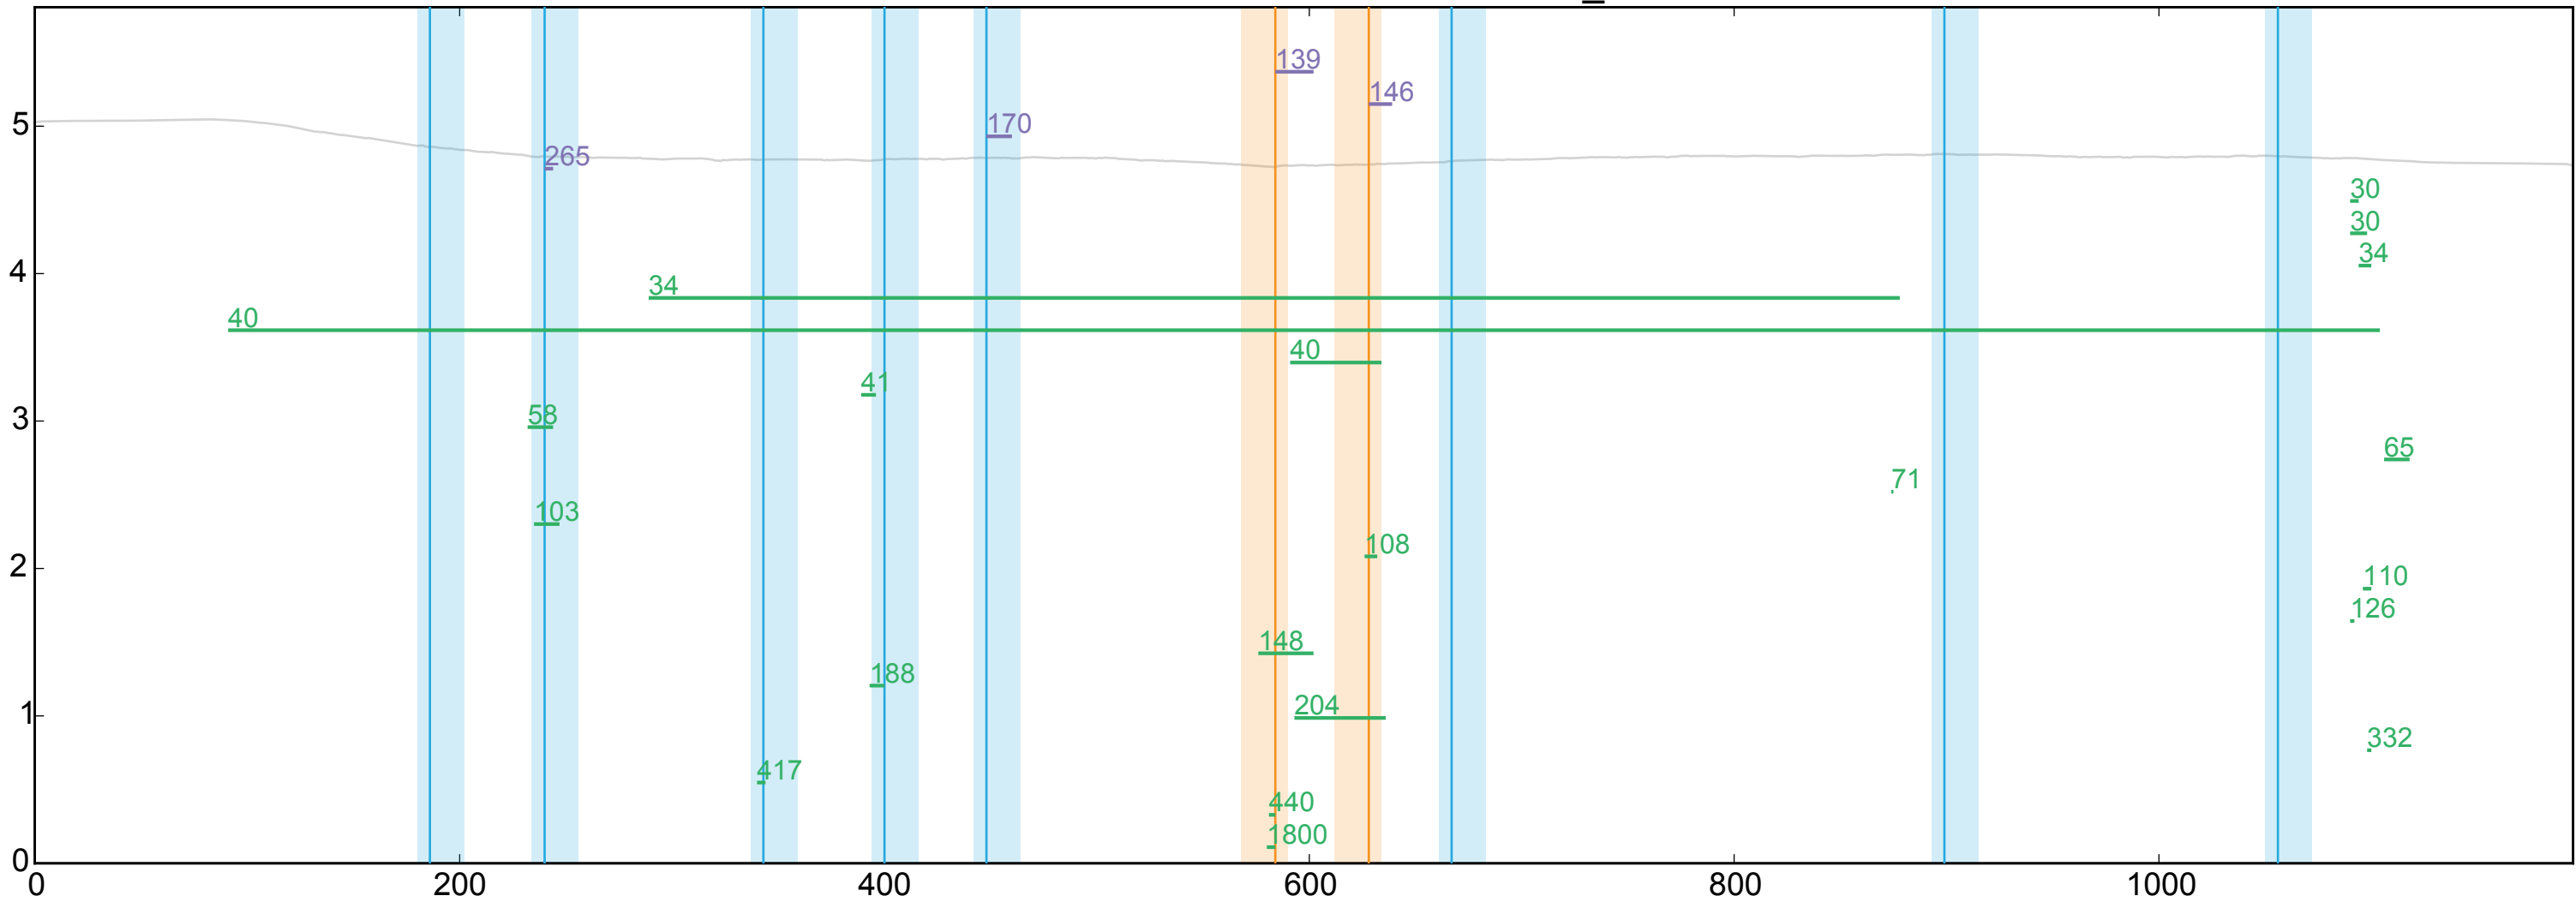

WT ENSDARG00000068912\_1

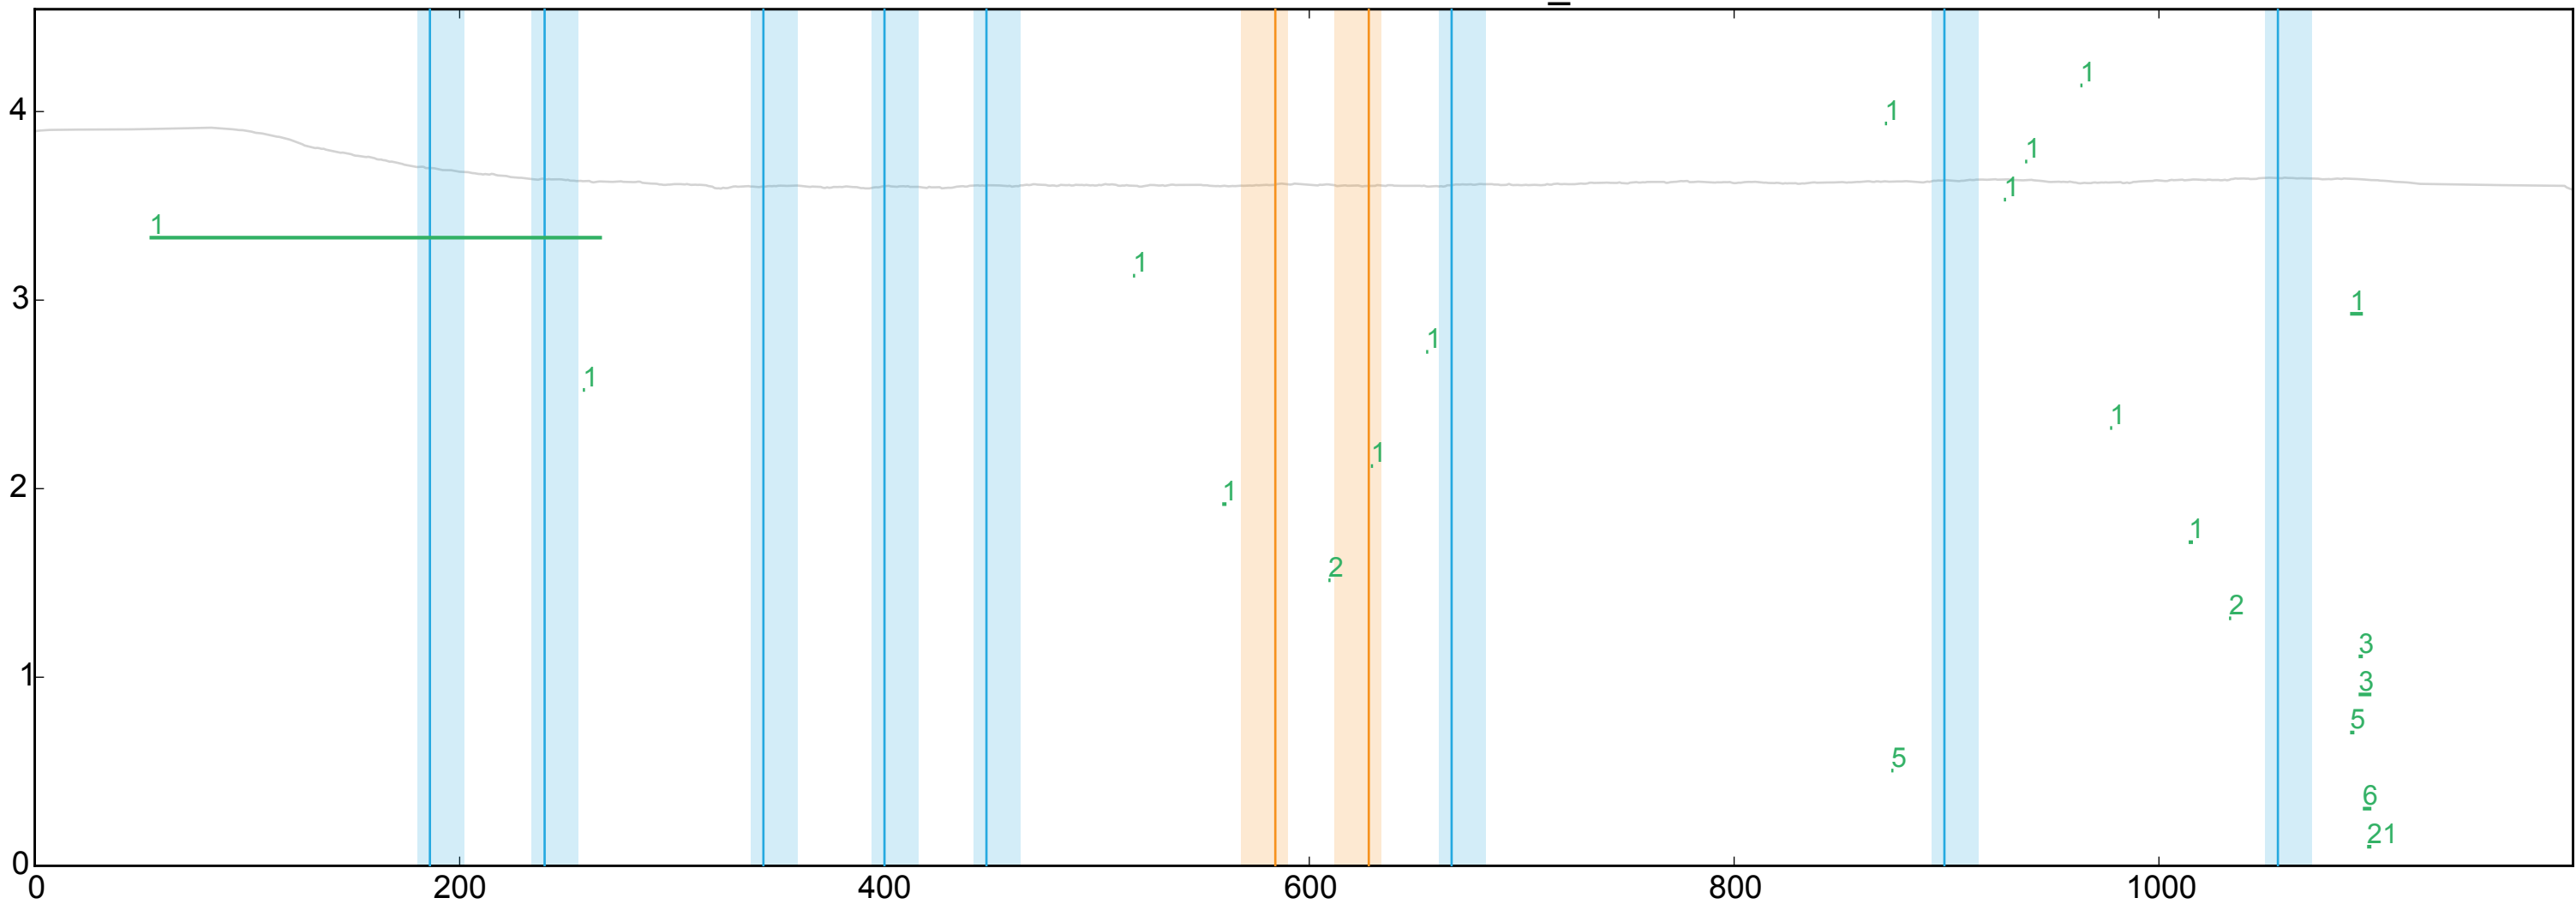

Mutant ENSDARG00000077293\_7

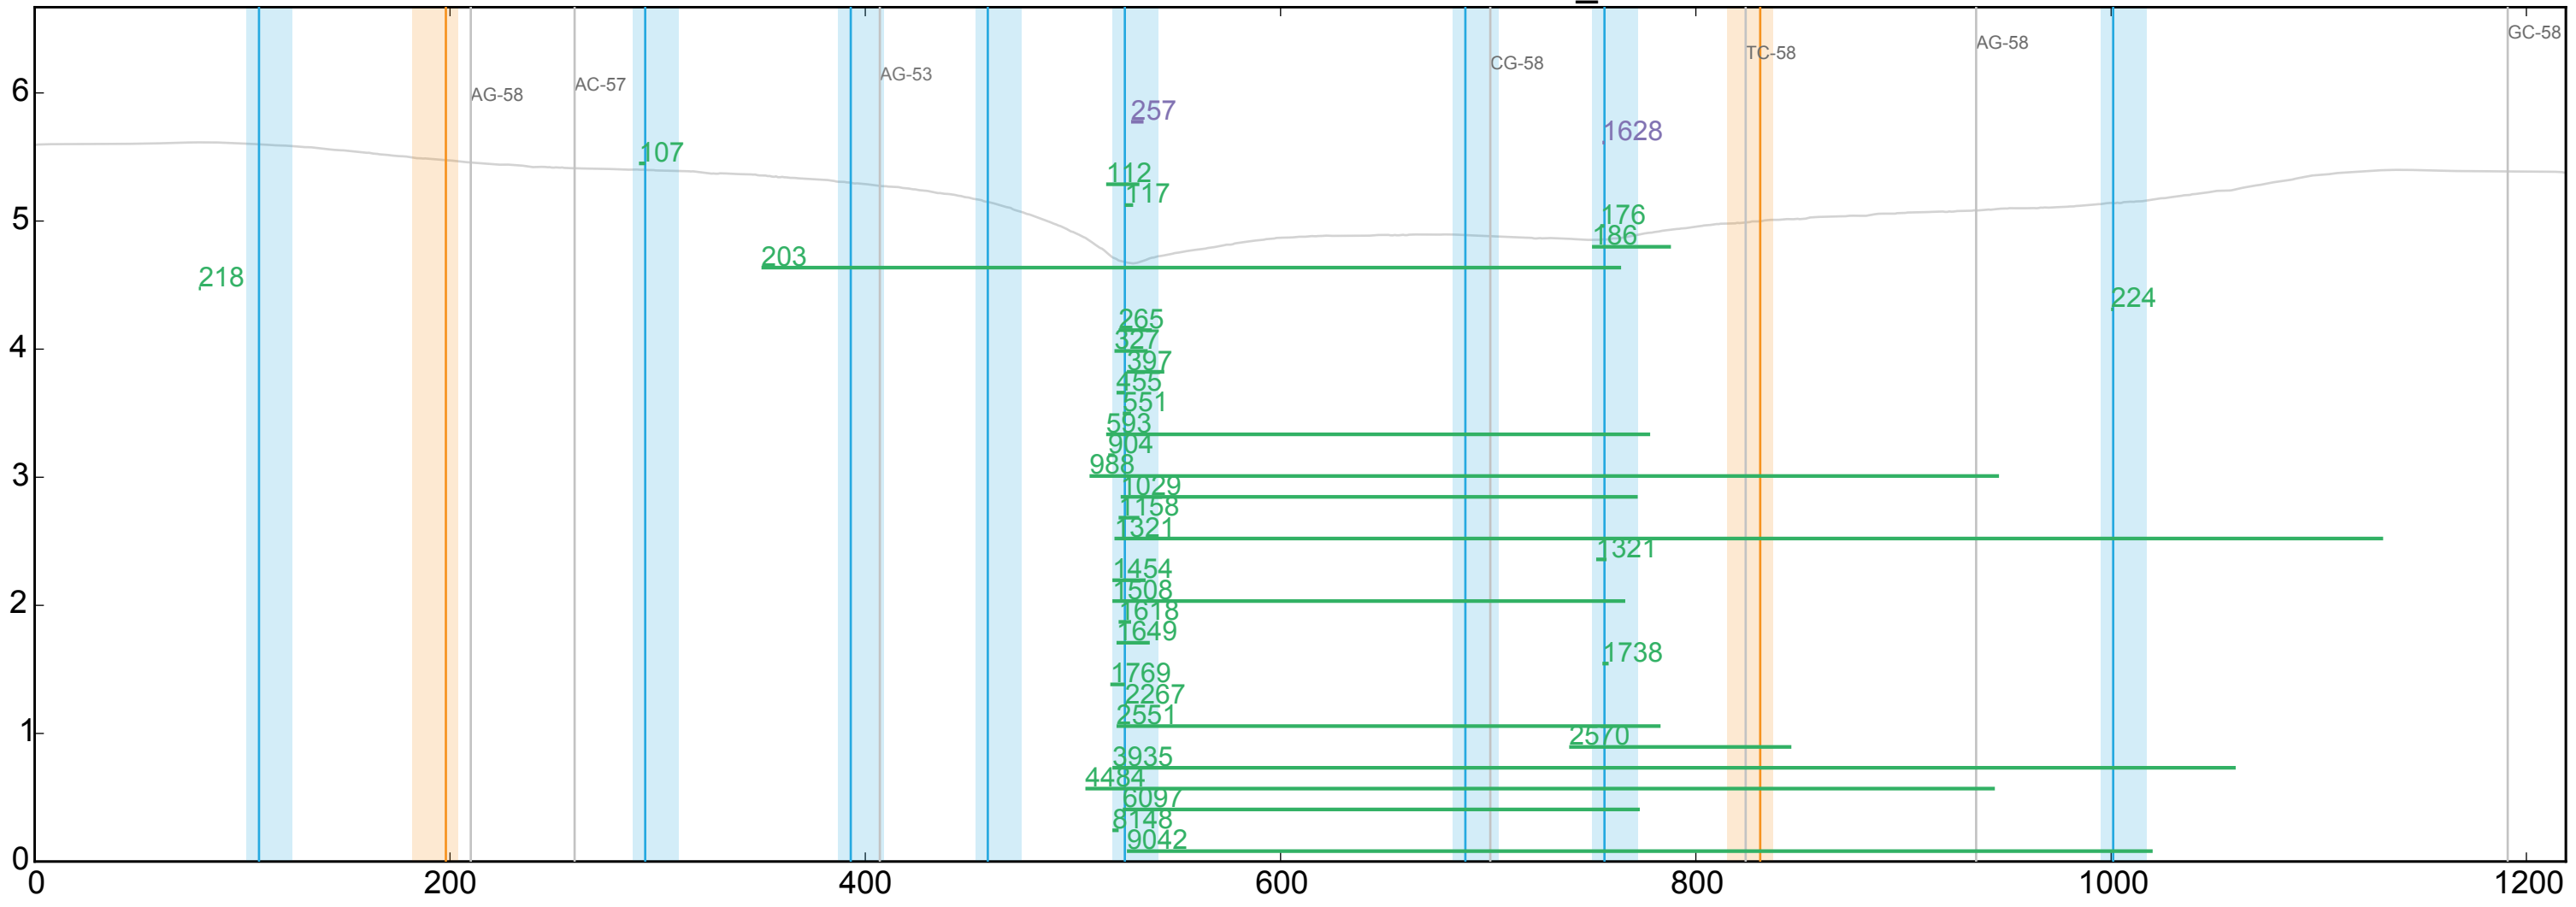

WT ENSDARG00000077293\_7

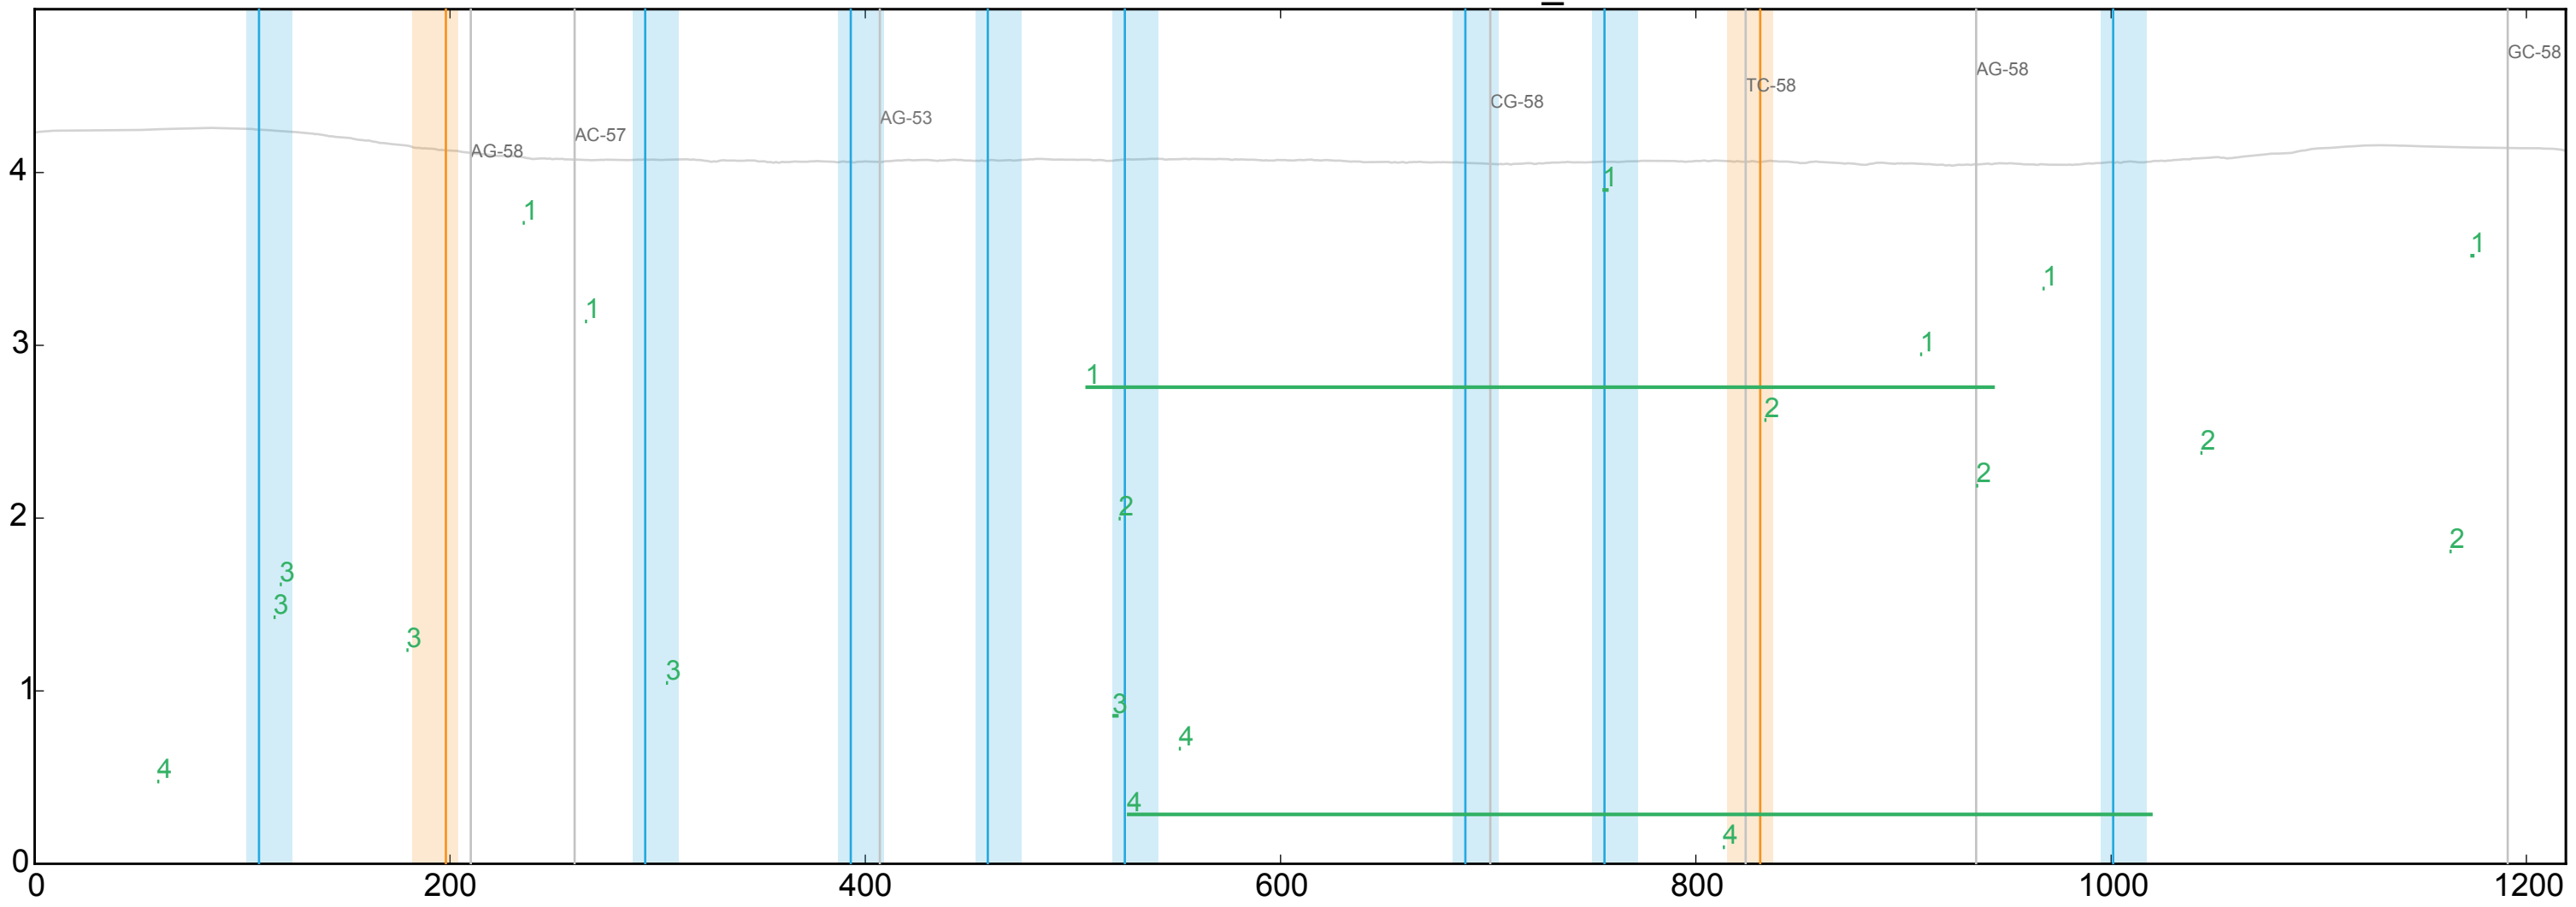

Mutant ENSDARG00000061685\_0

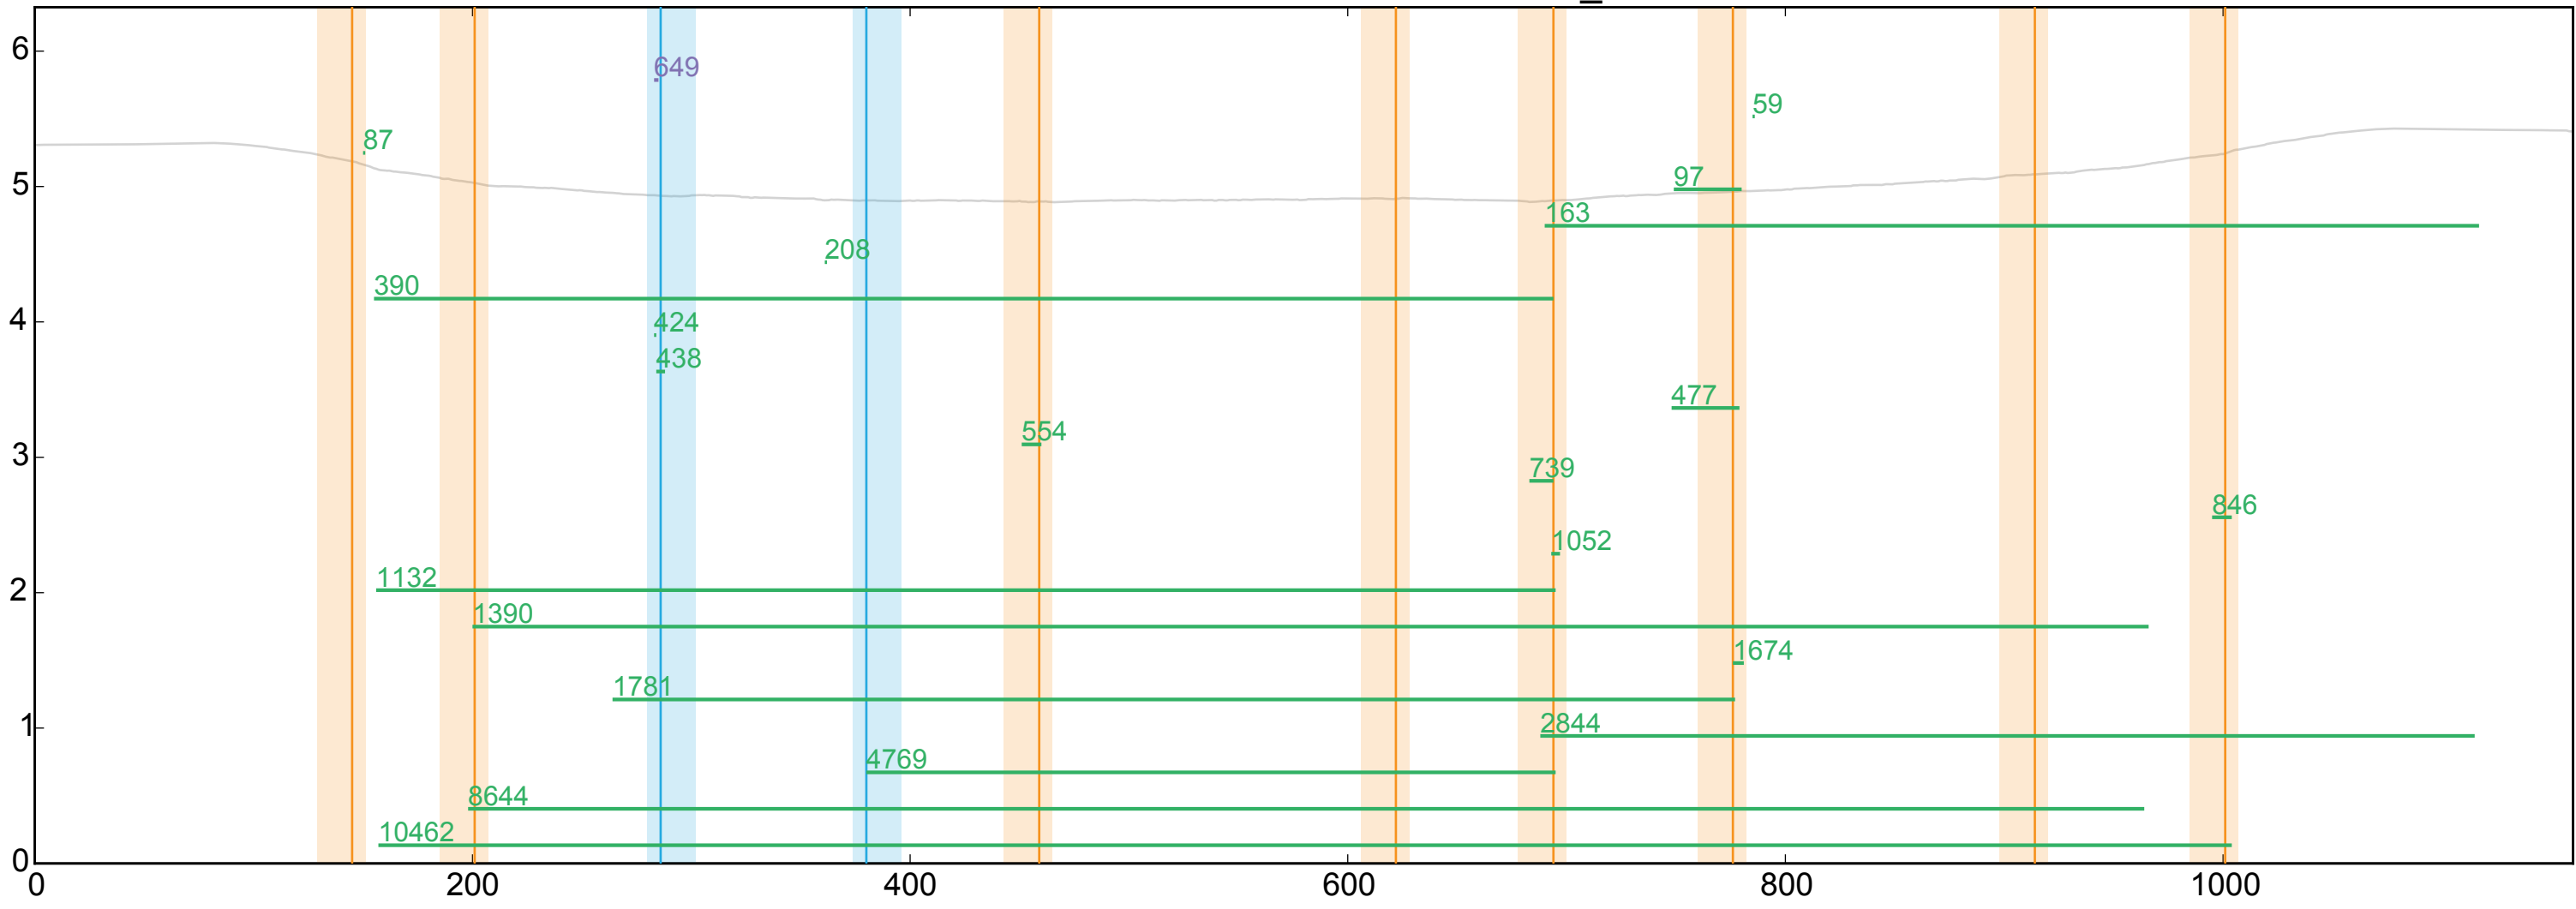

WT ENSDARG00000061685\_0

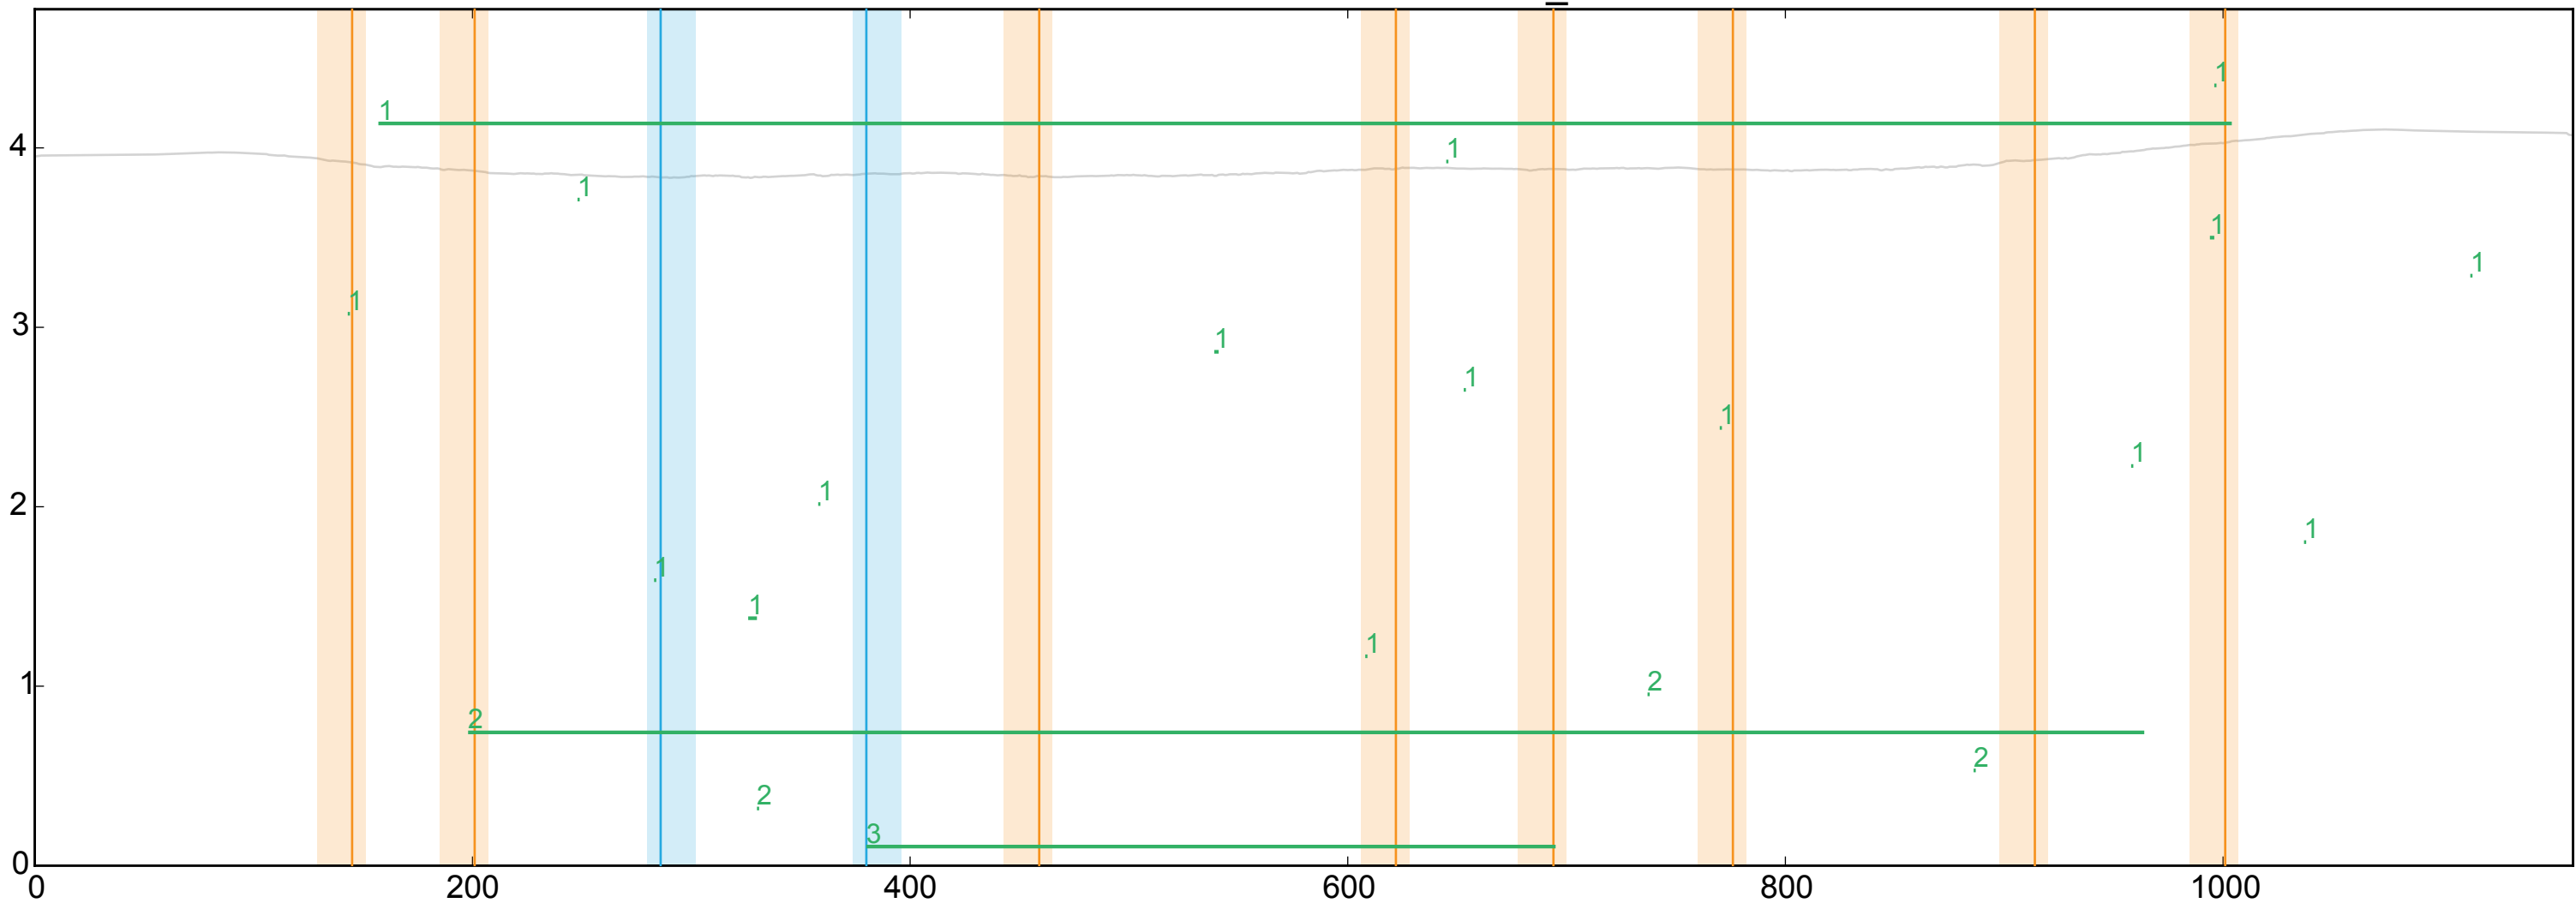



Mutant ENSDARG00000033845\_4

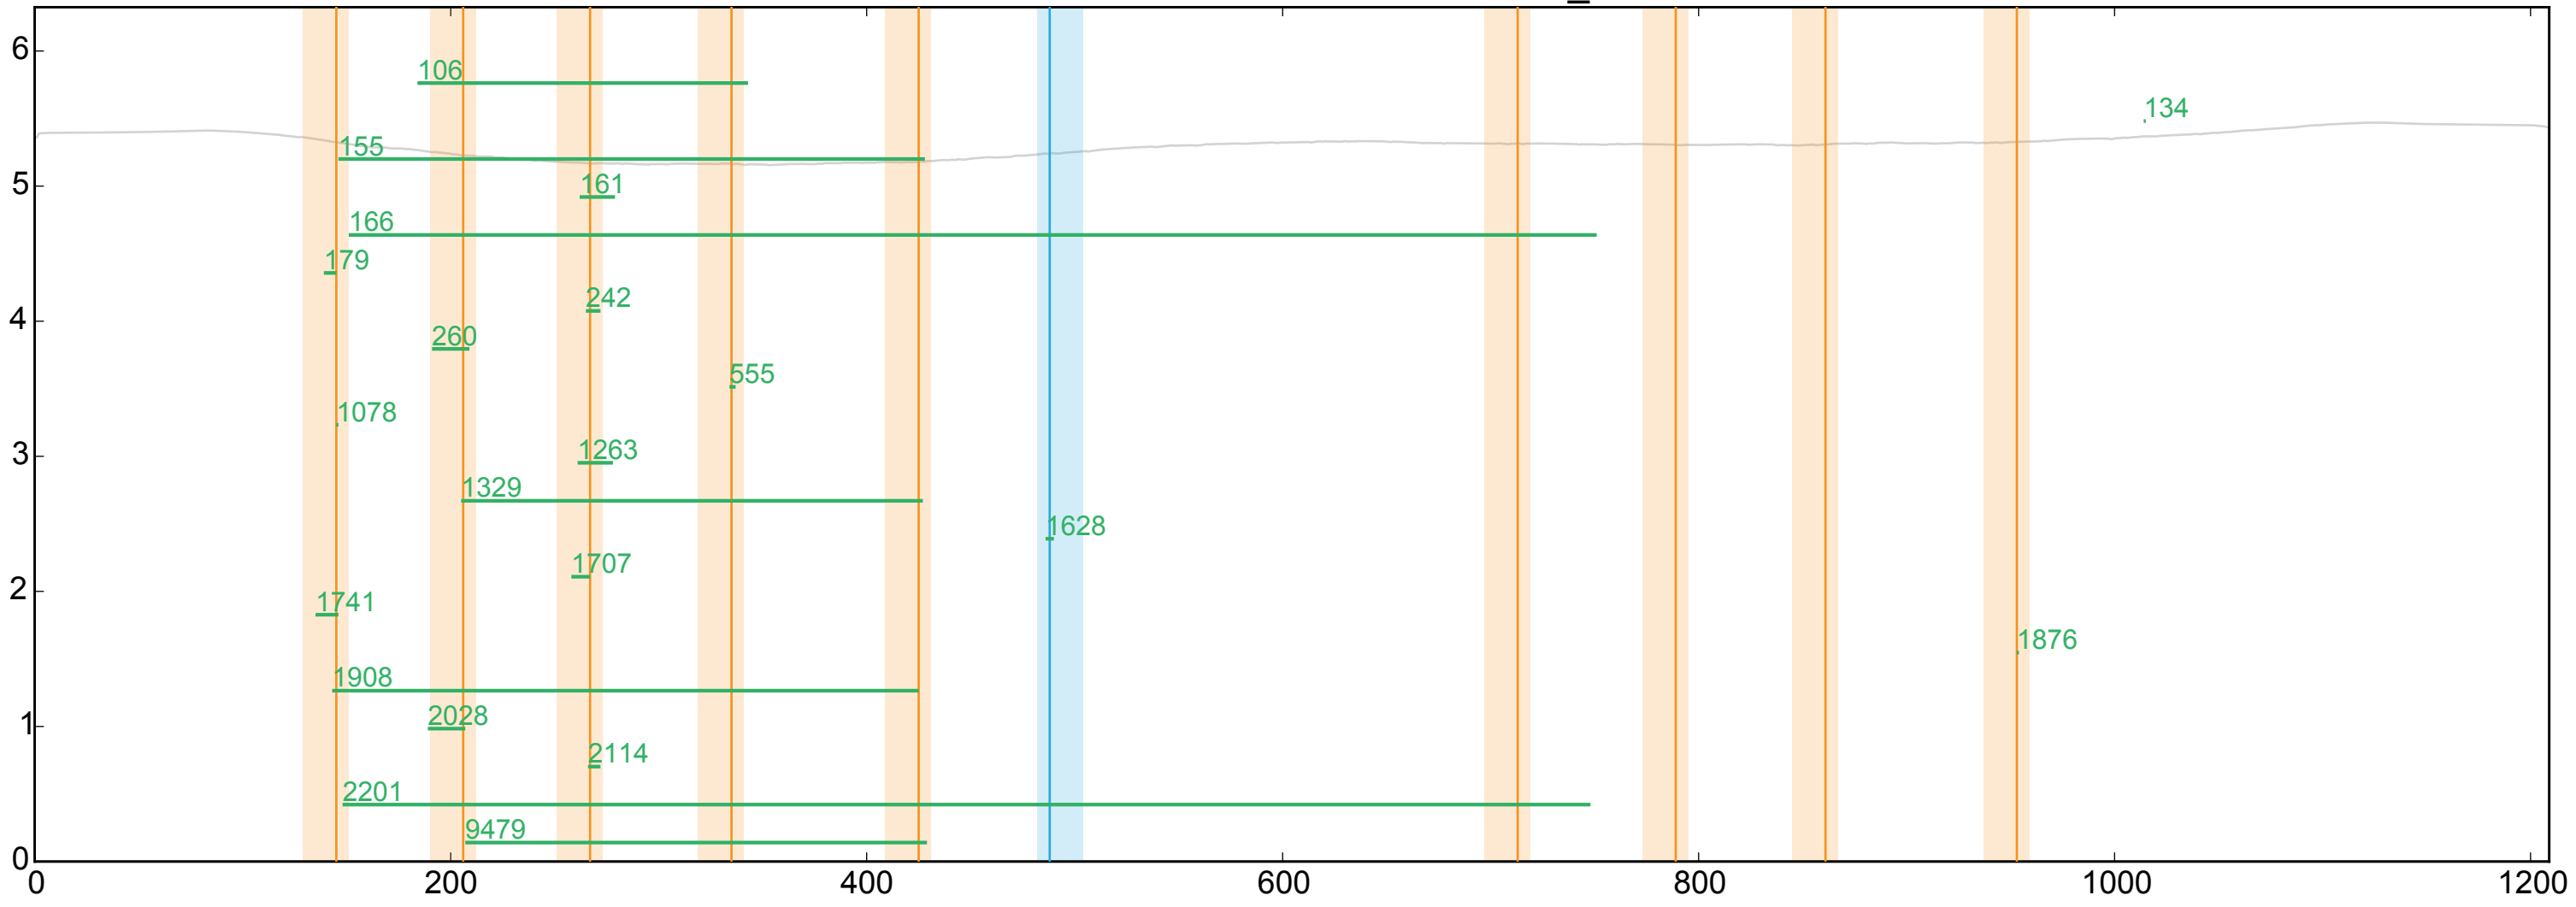

WT ENSDARG00000033845\_4

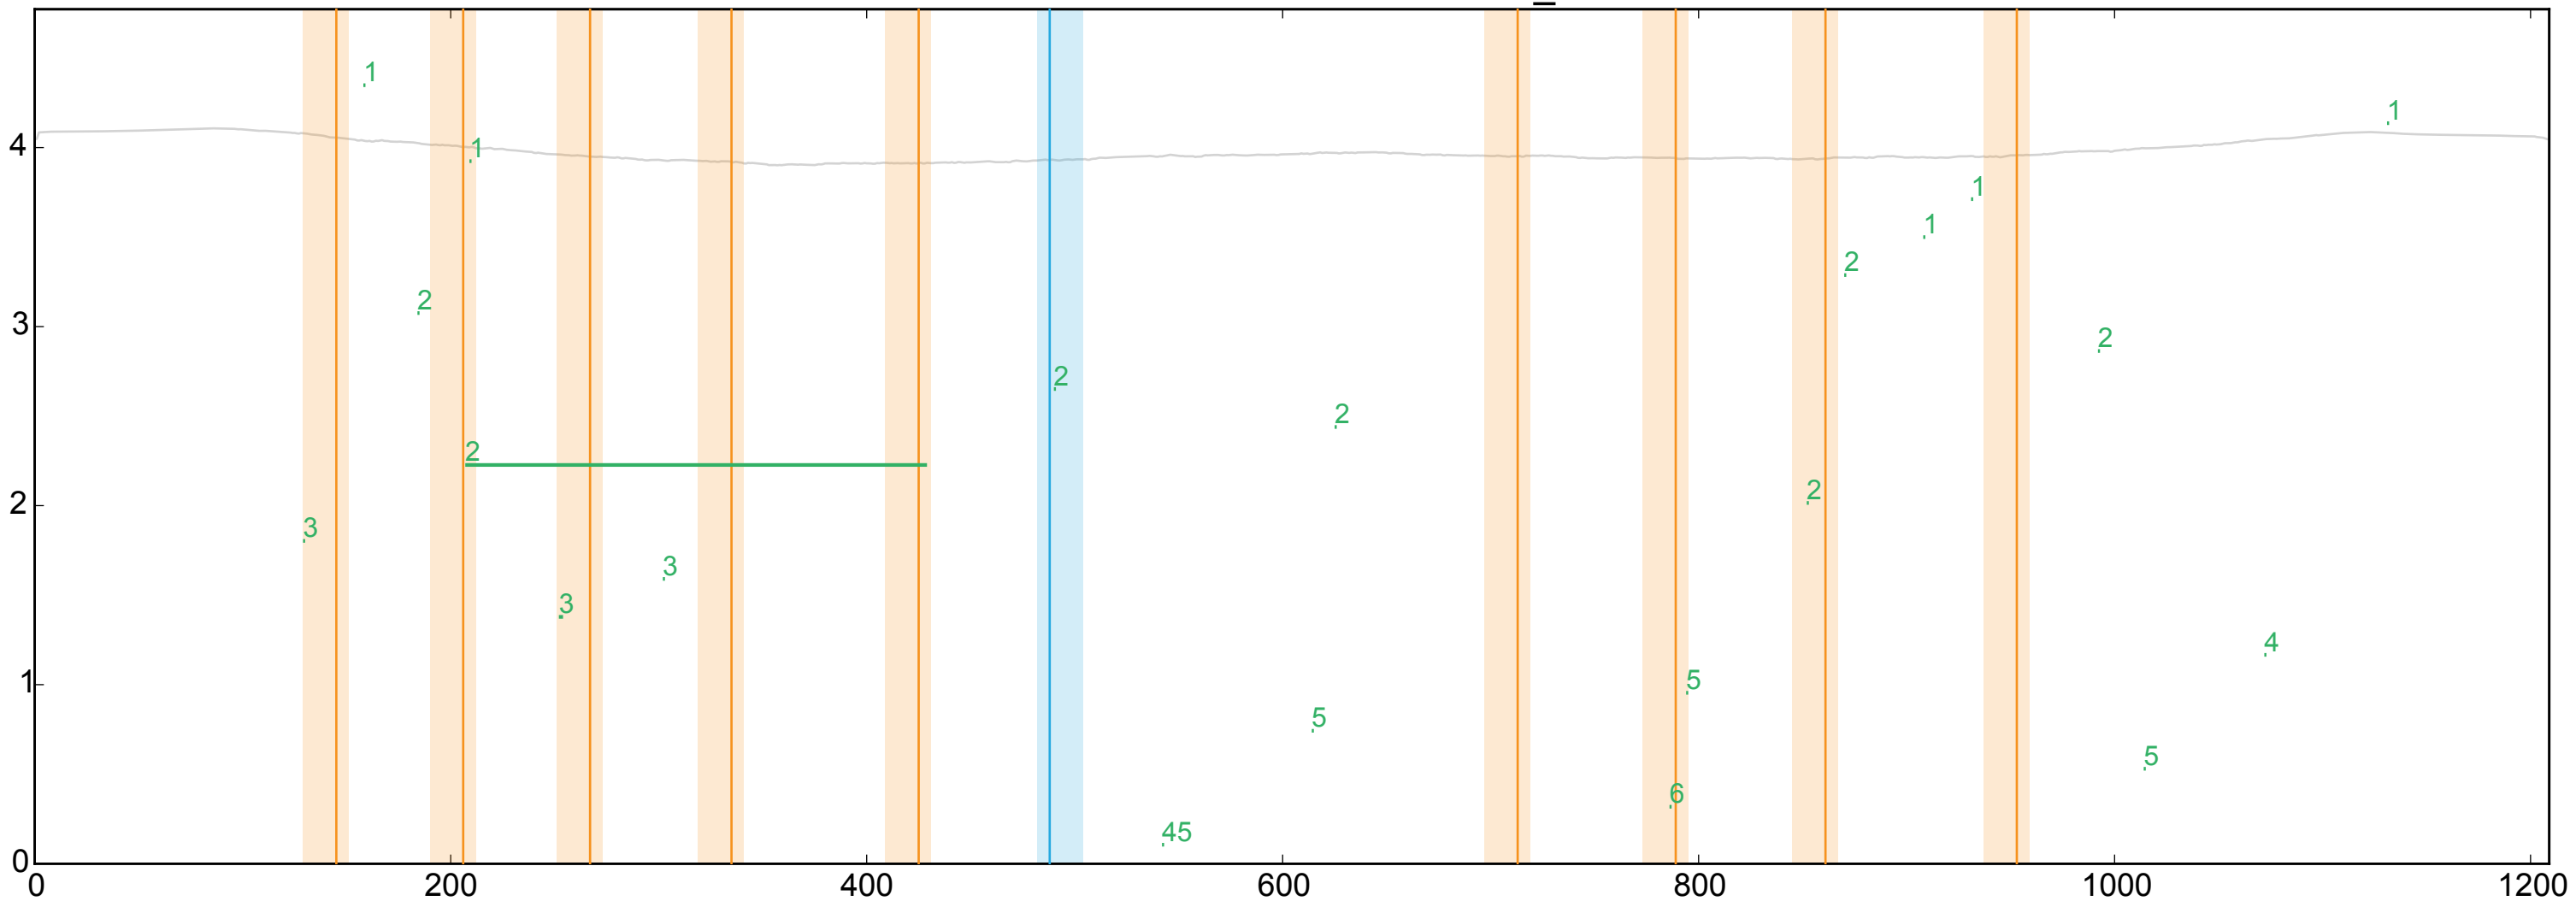

Mutant ENSDARG00000058089\_0

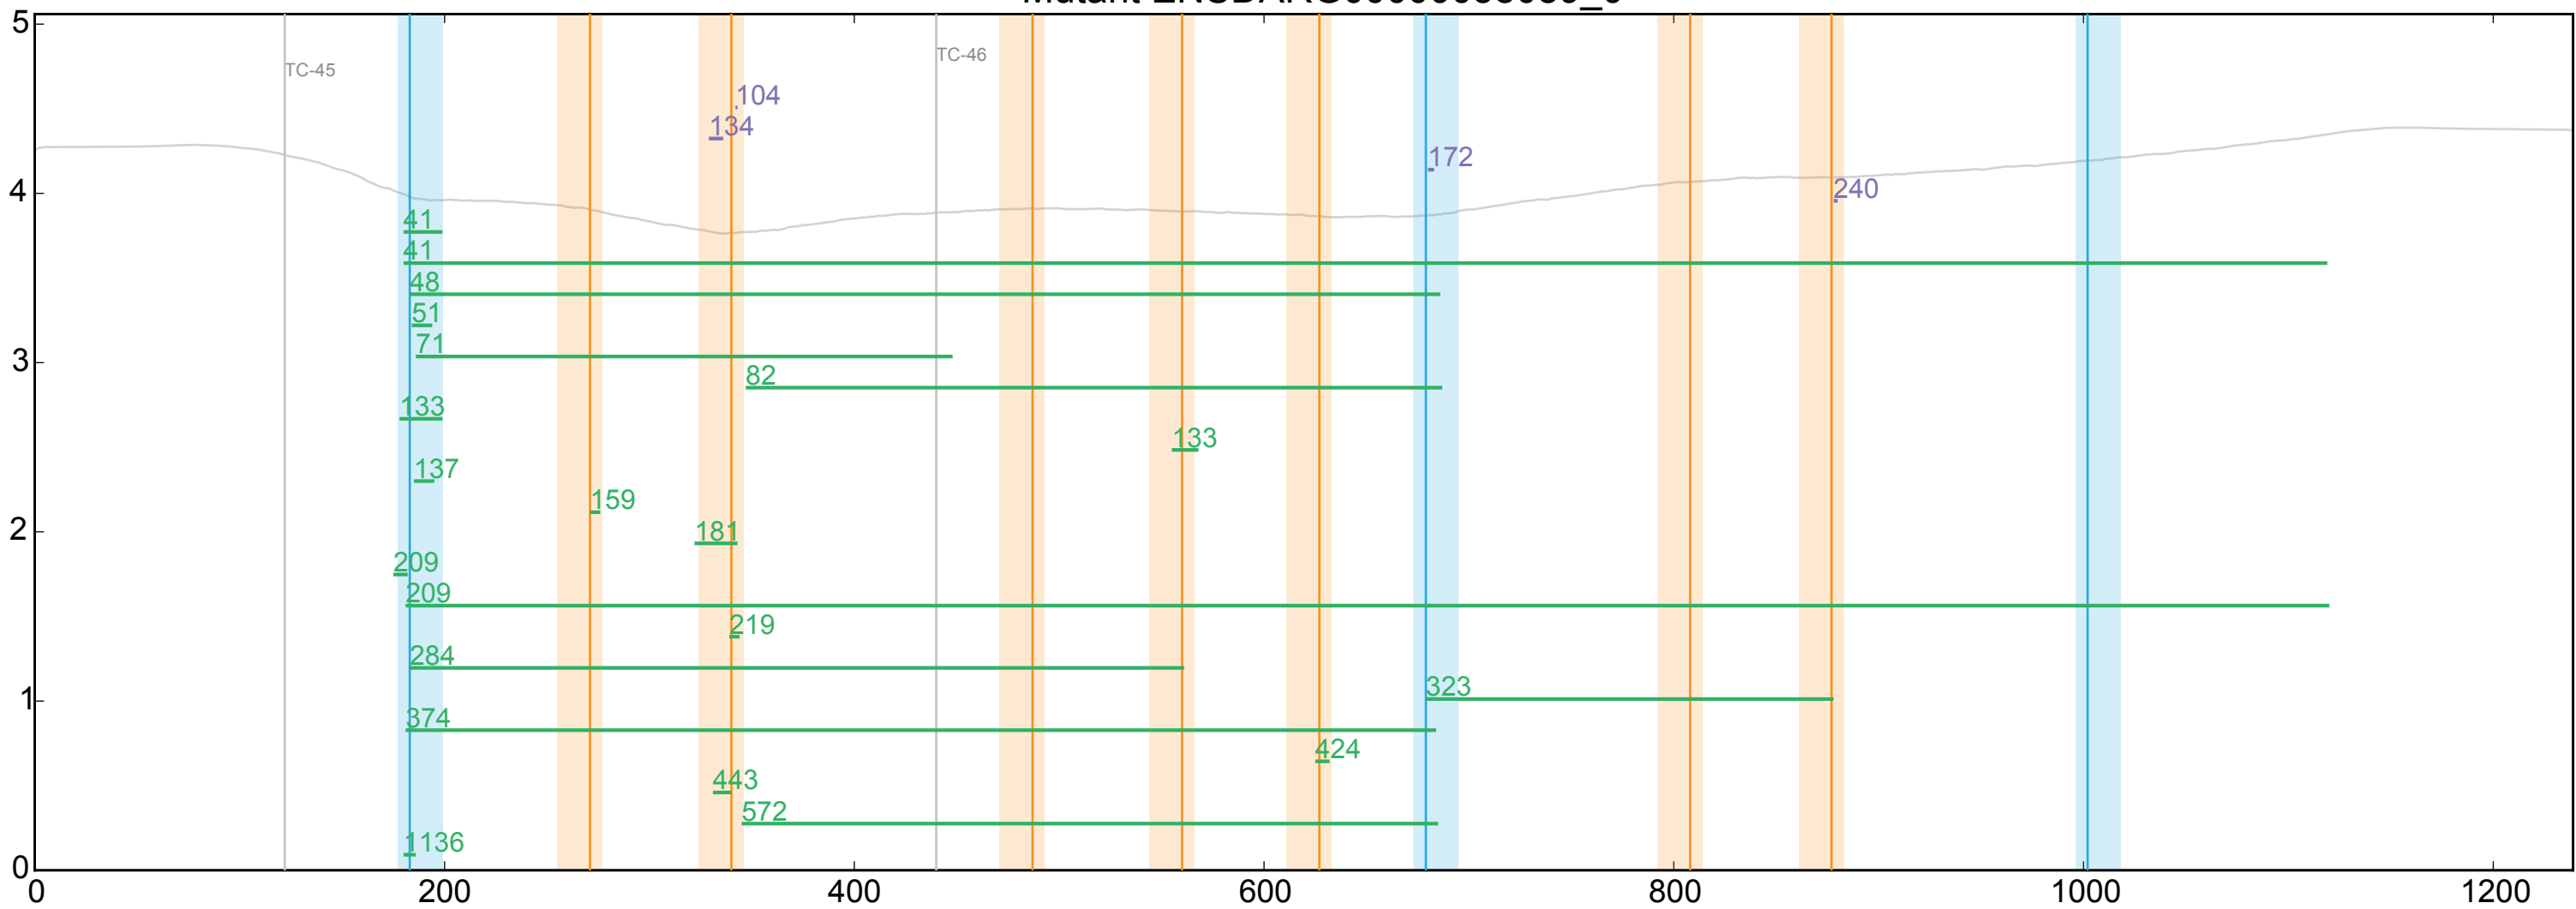

WT ENSDARG00000058089\_0

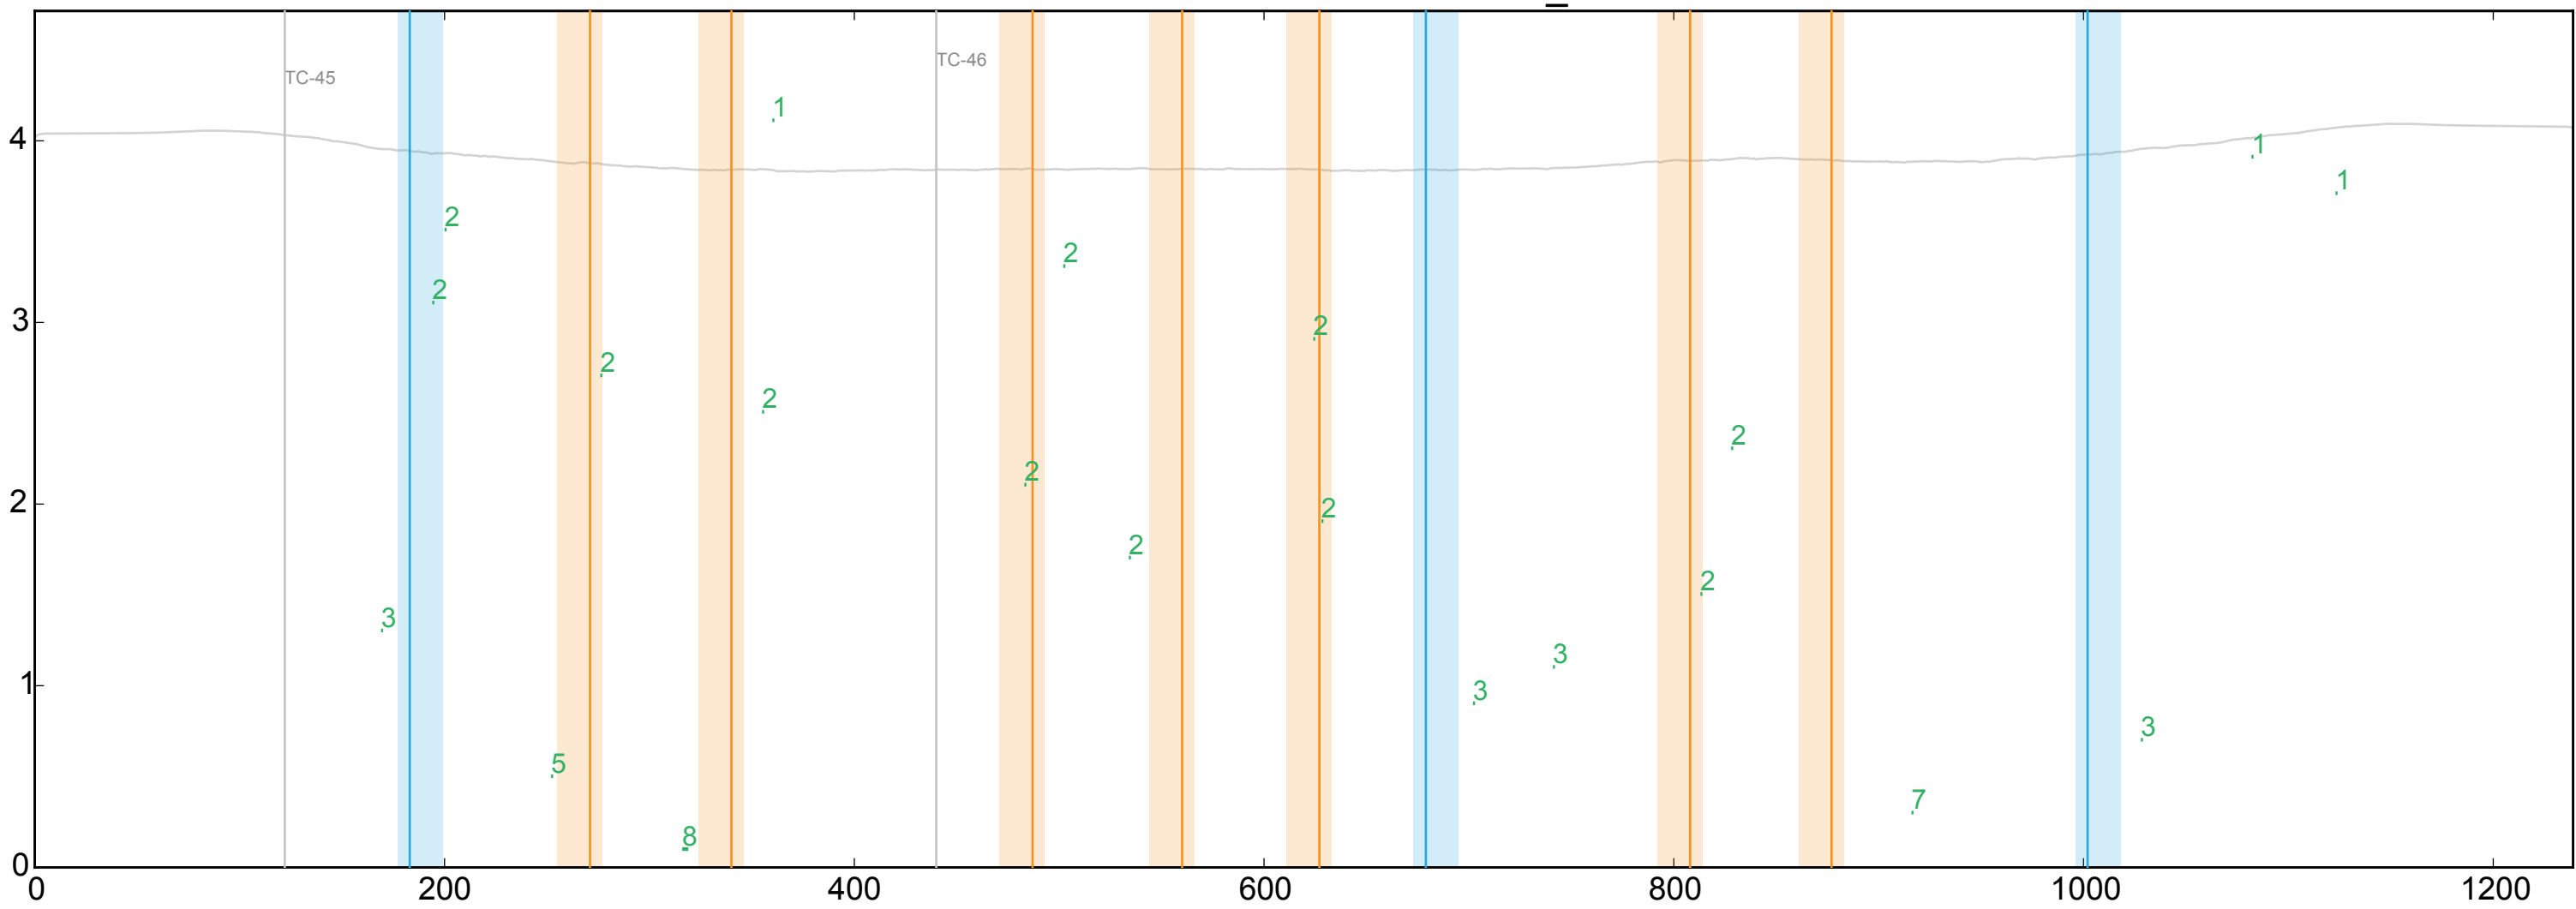



Mutant ENSDARG00000036245\_3

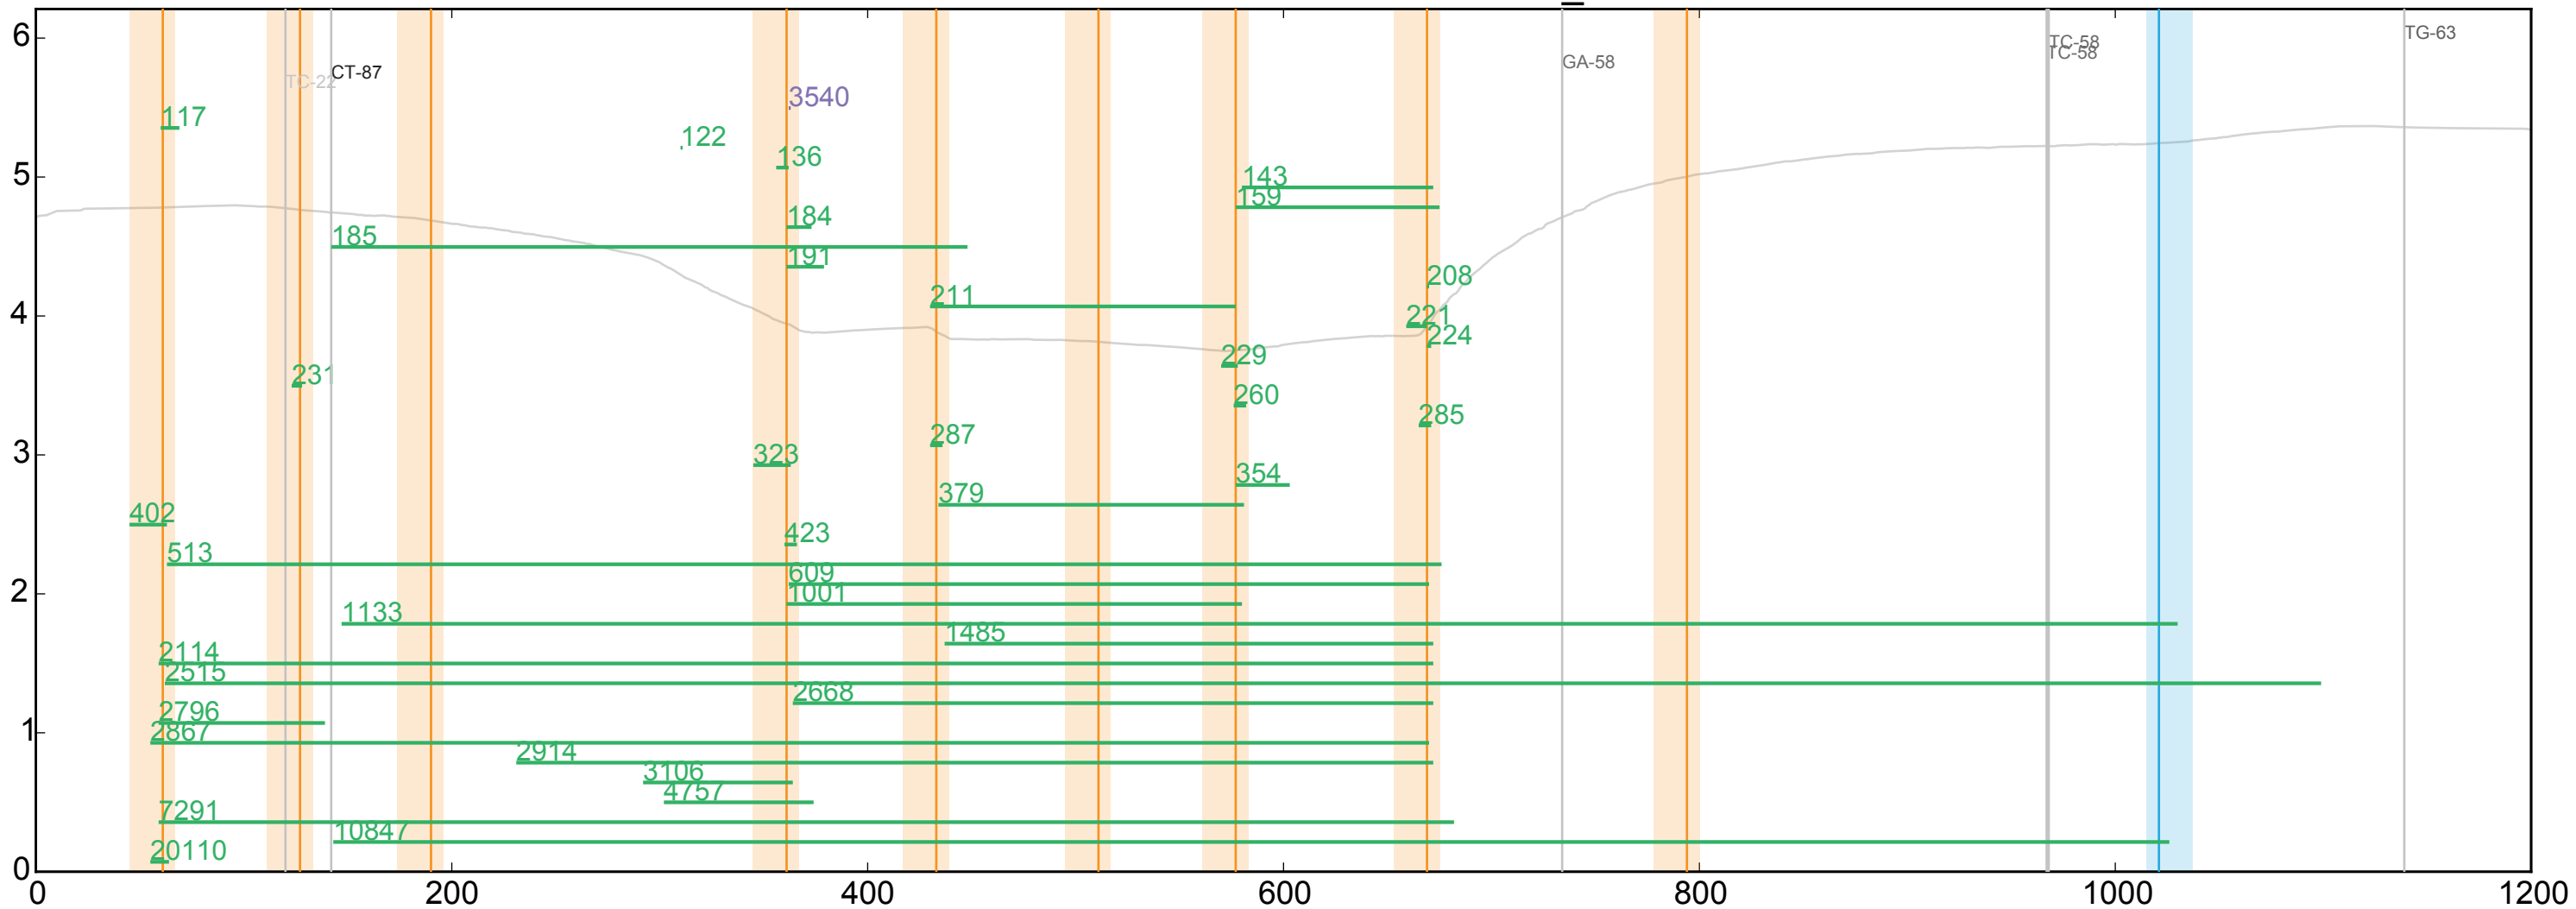

WT ENSDARG00000036245\_3

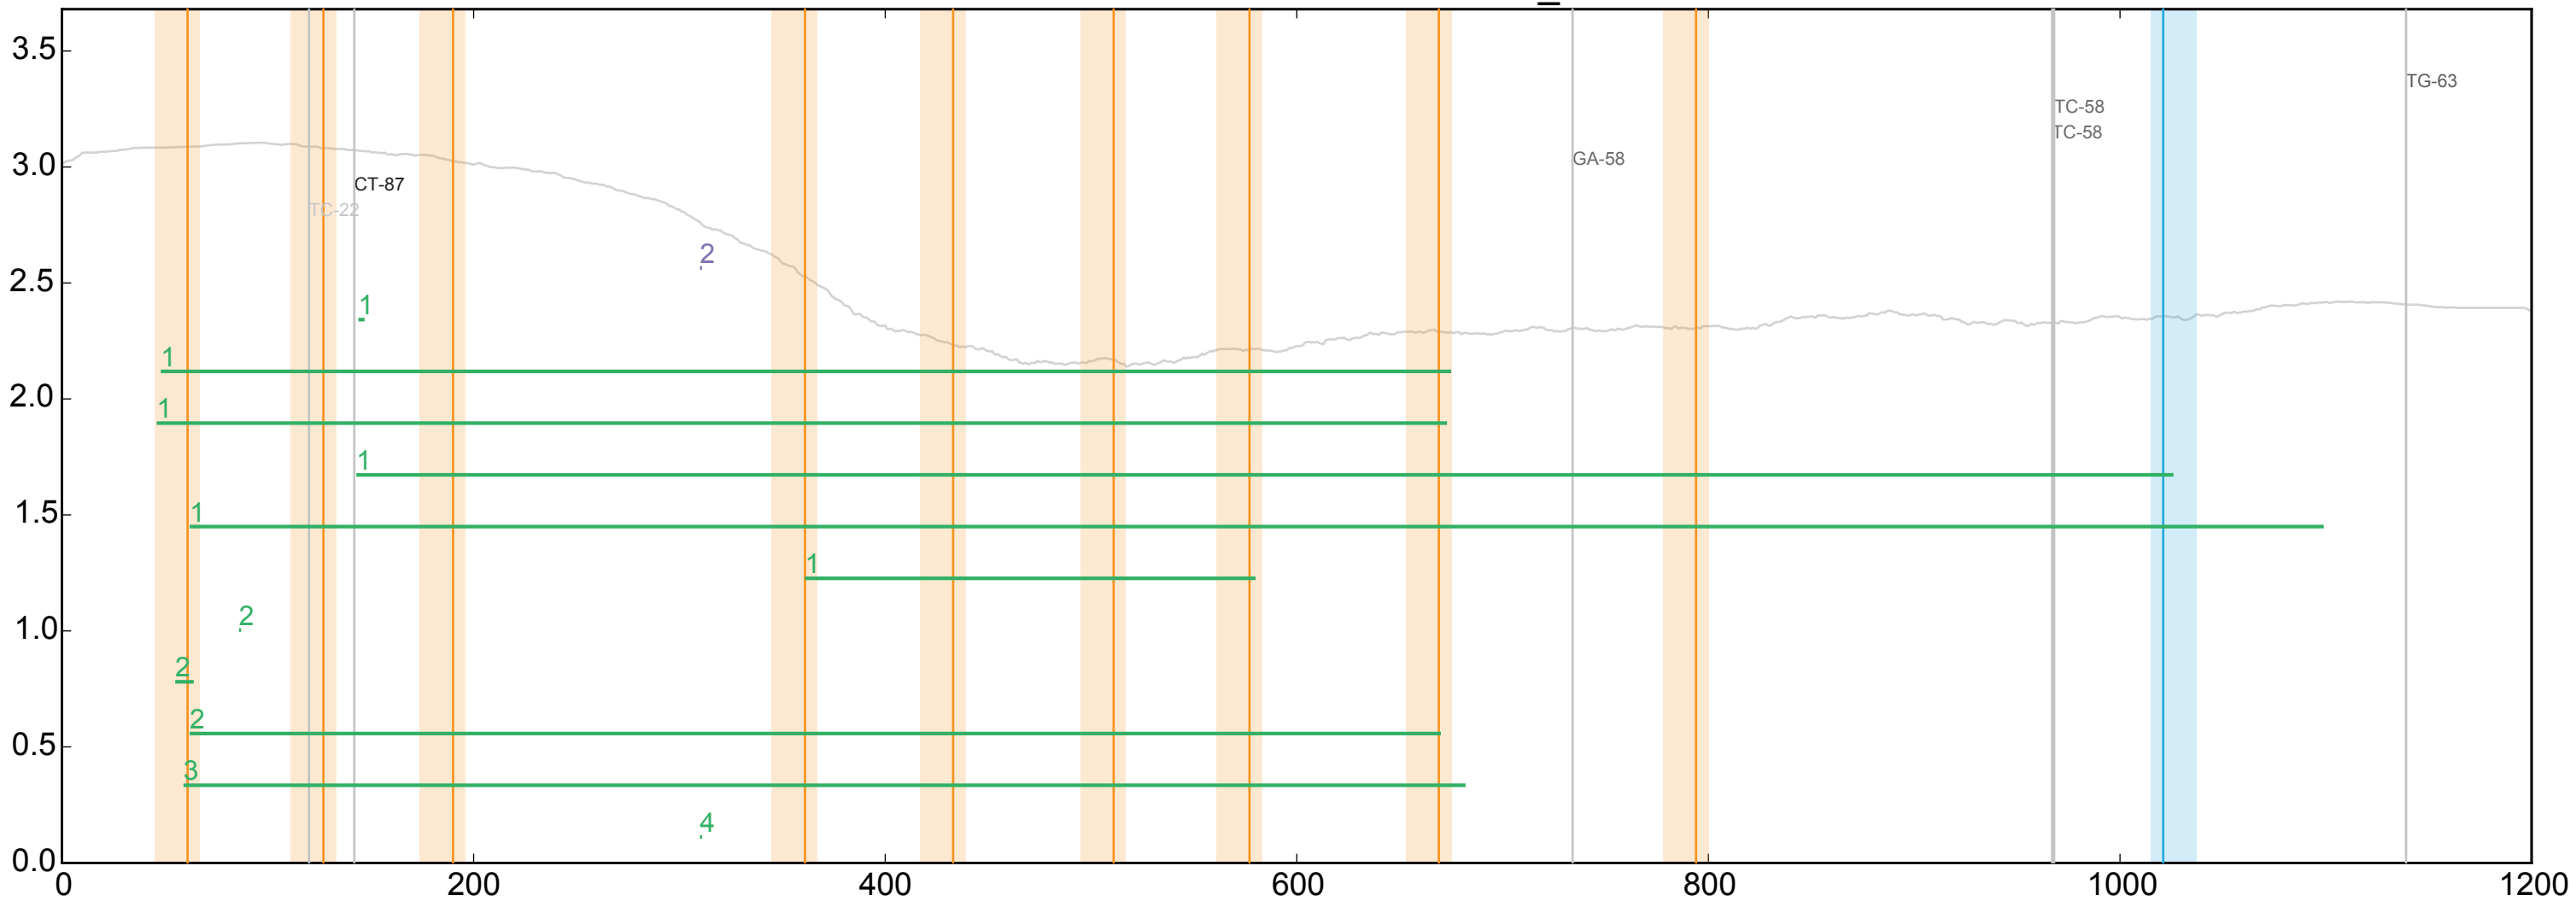

Mutant ENSDARG00000039878\_12

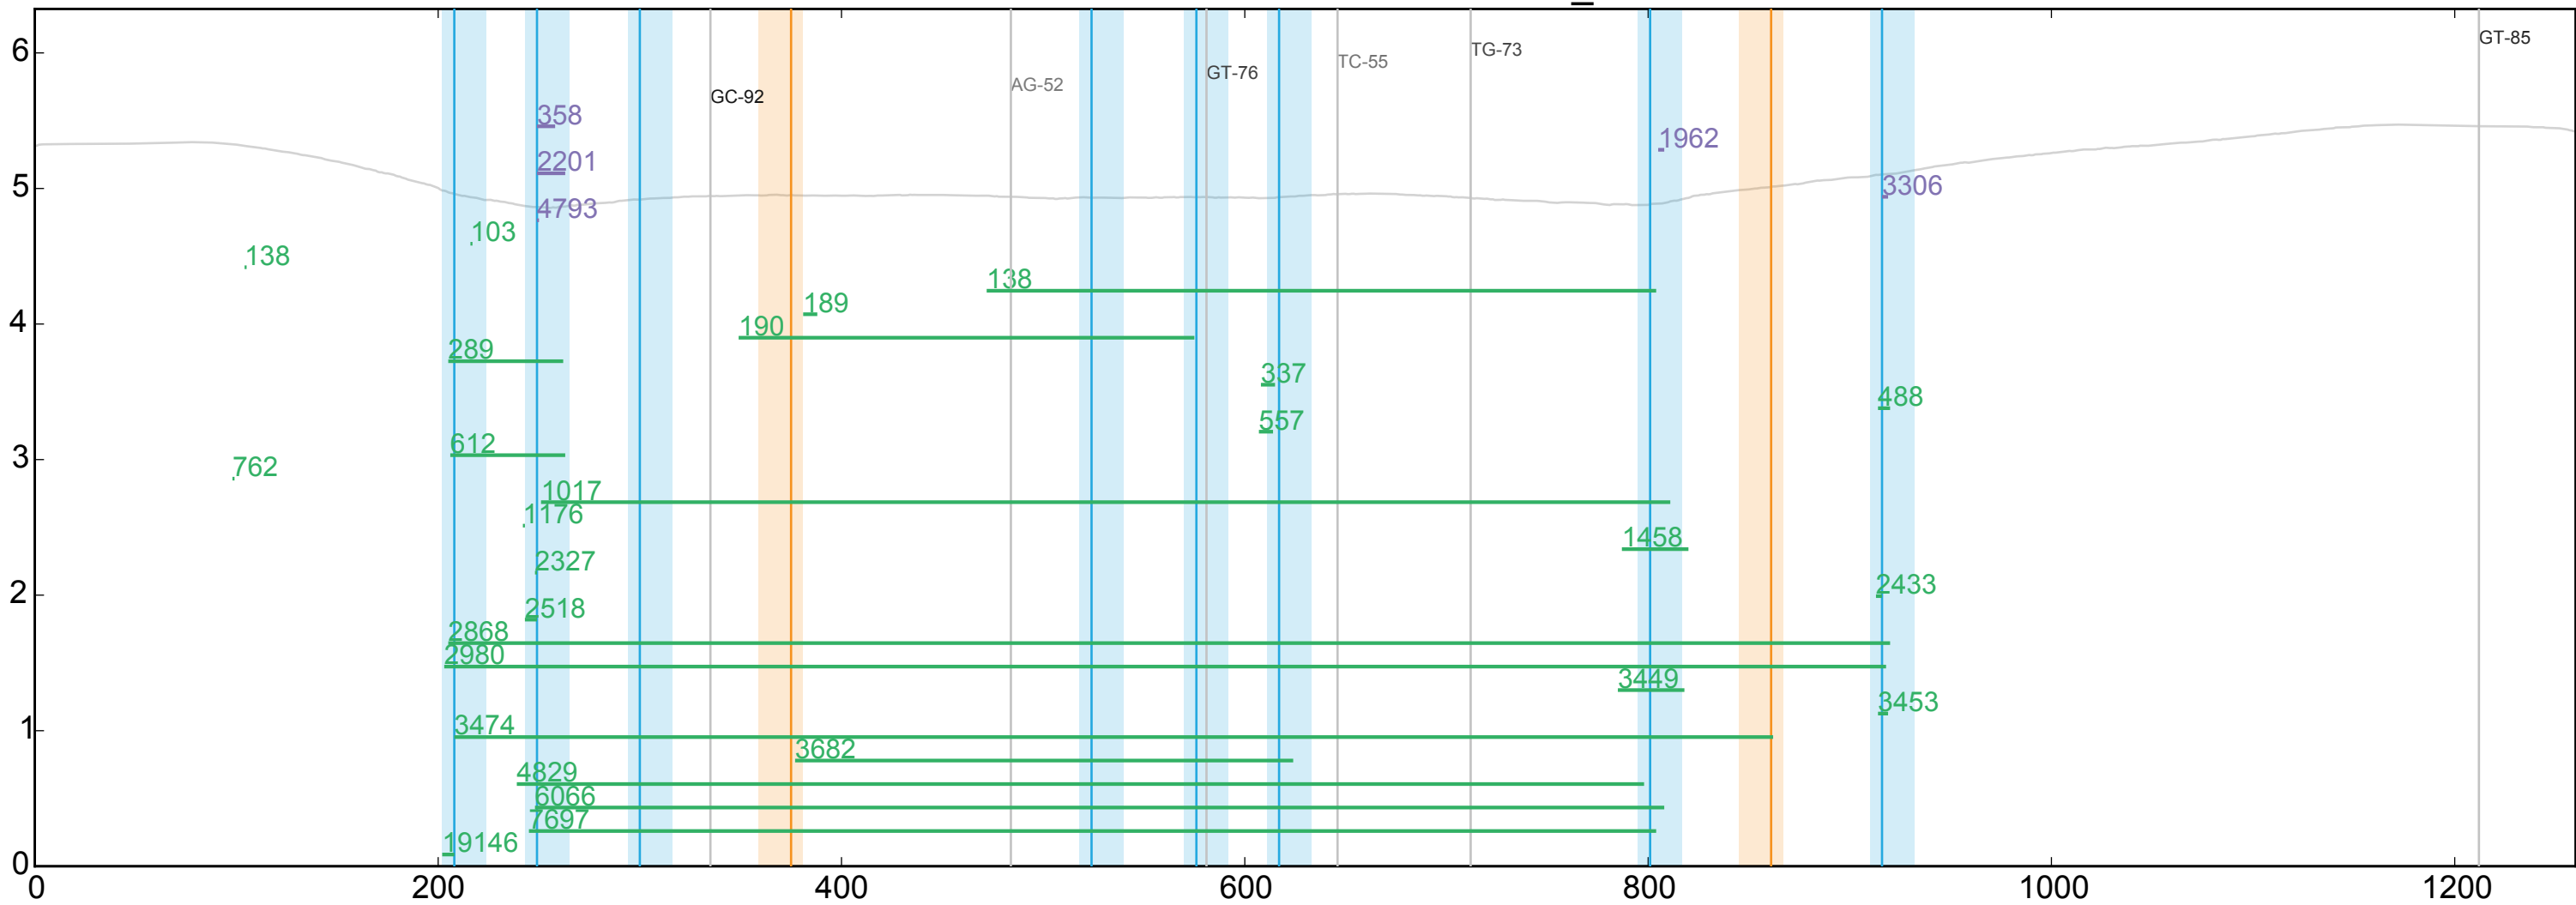

WT ENSDARG00000039878\_12

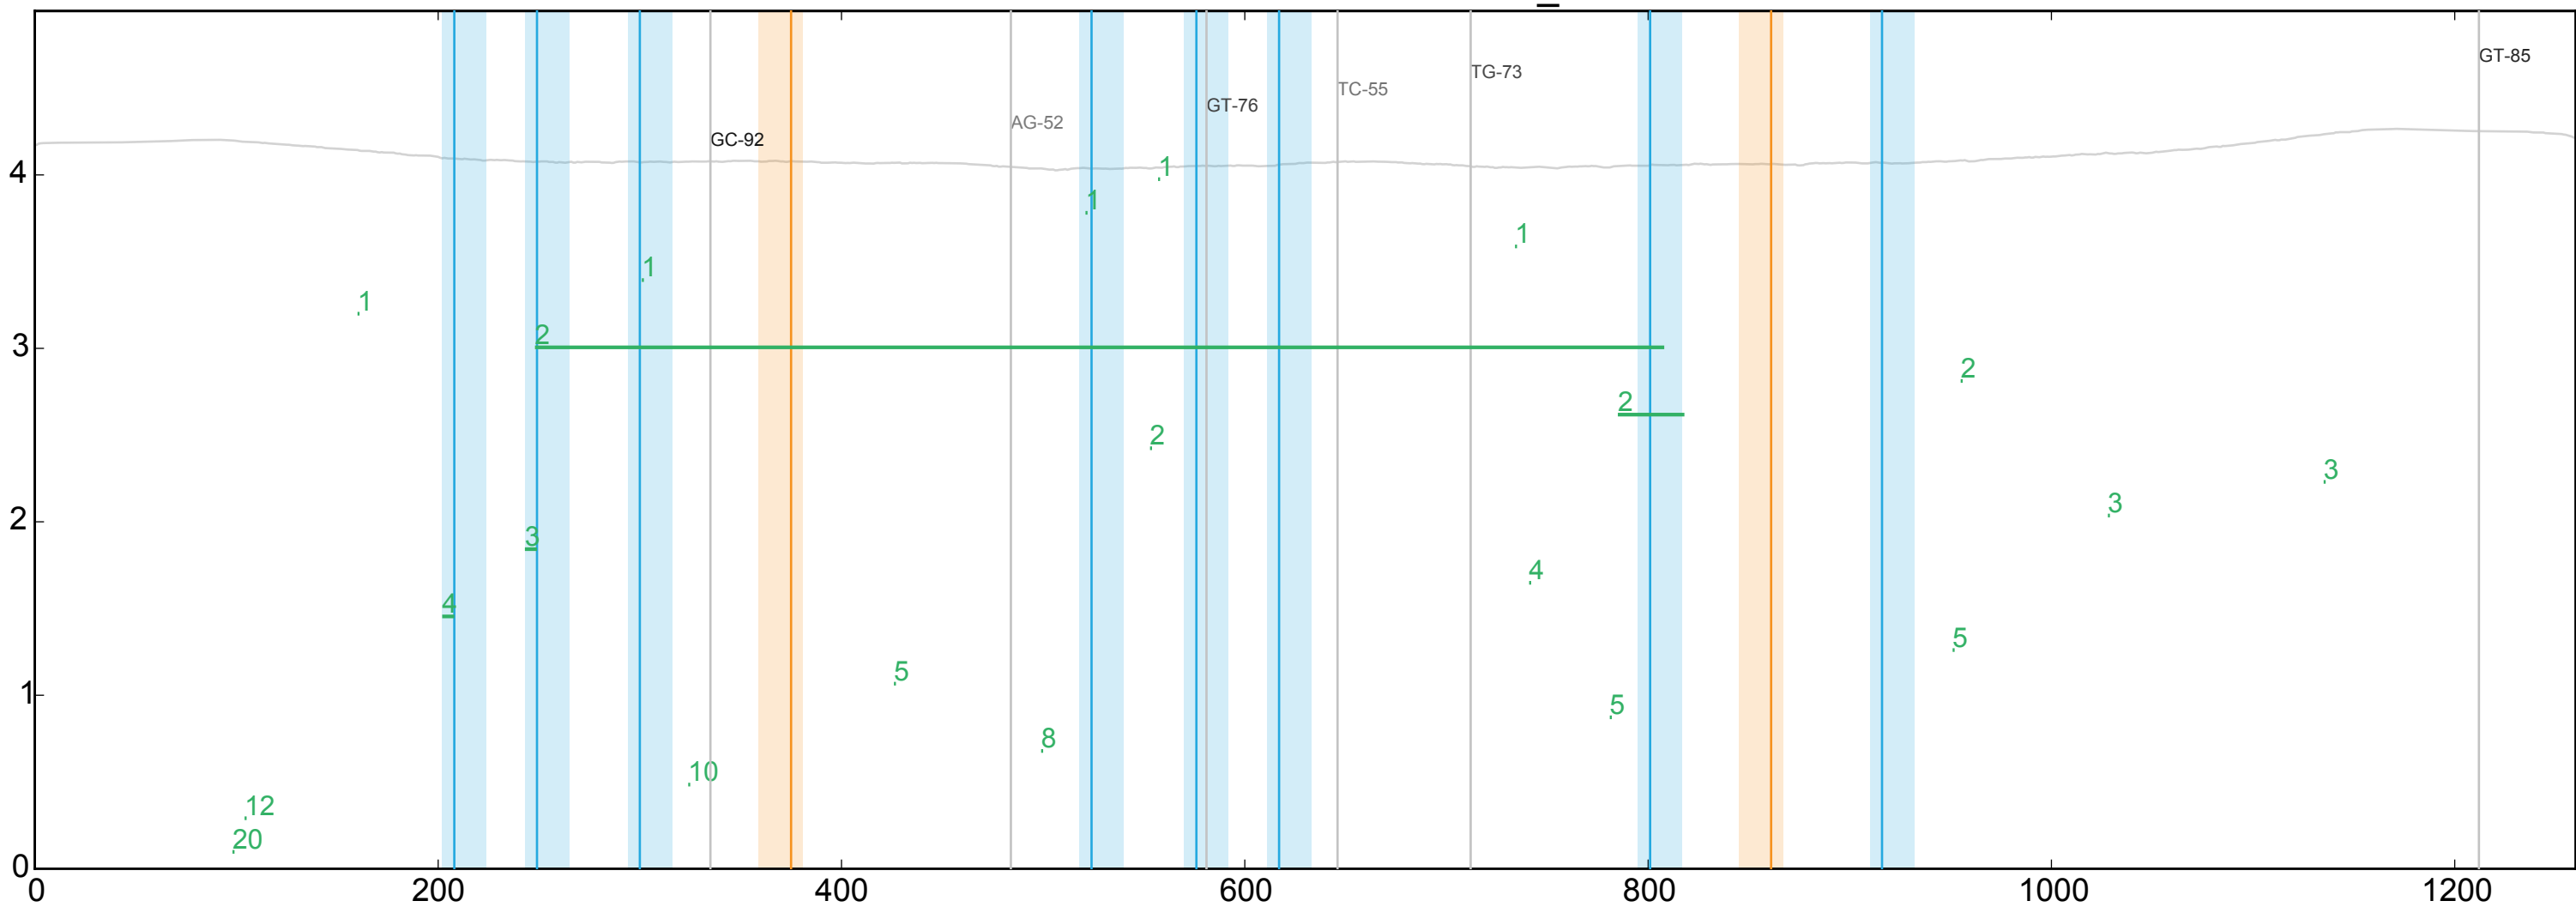

Mutant ENSDARG00000015567\_2

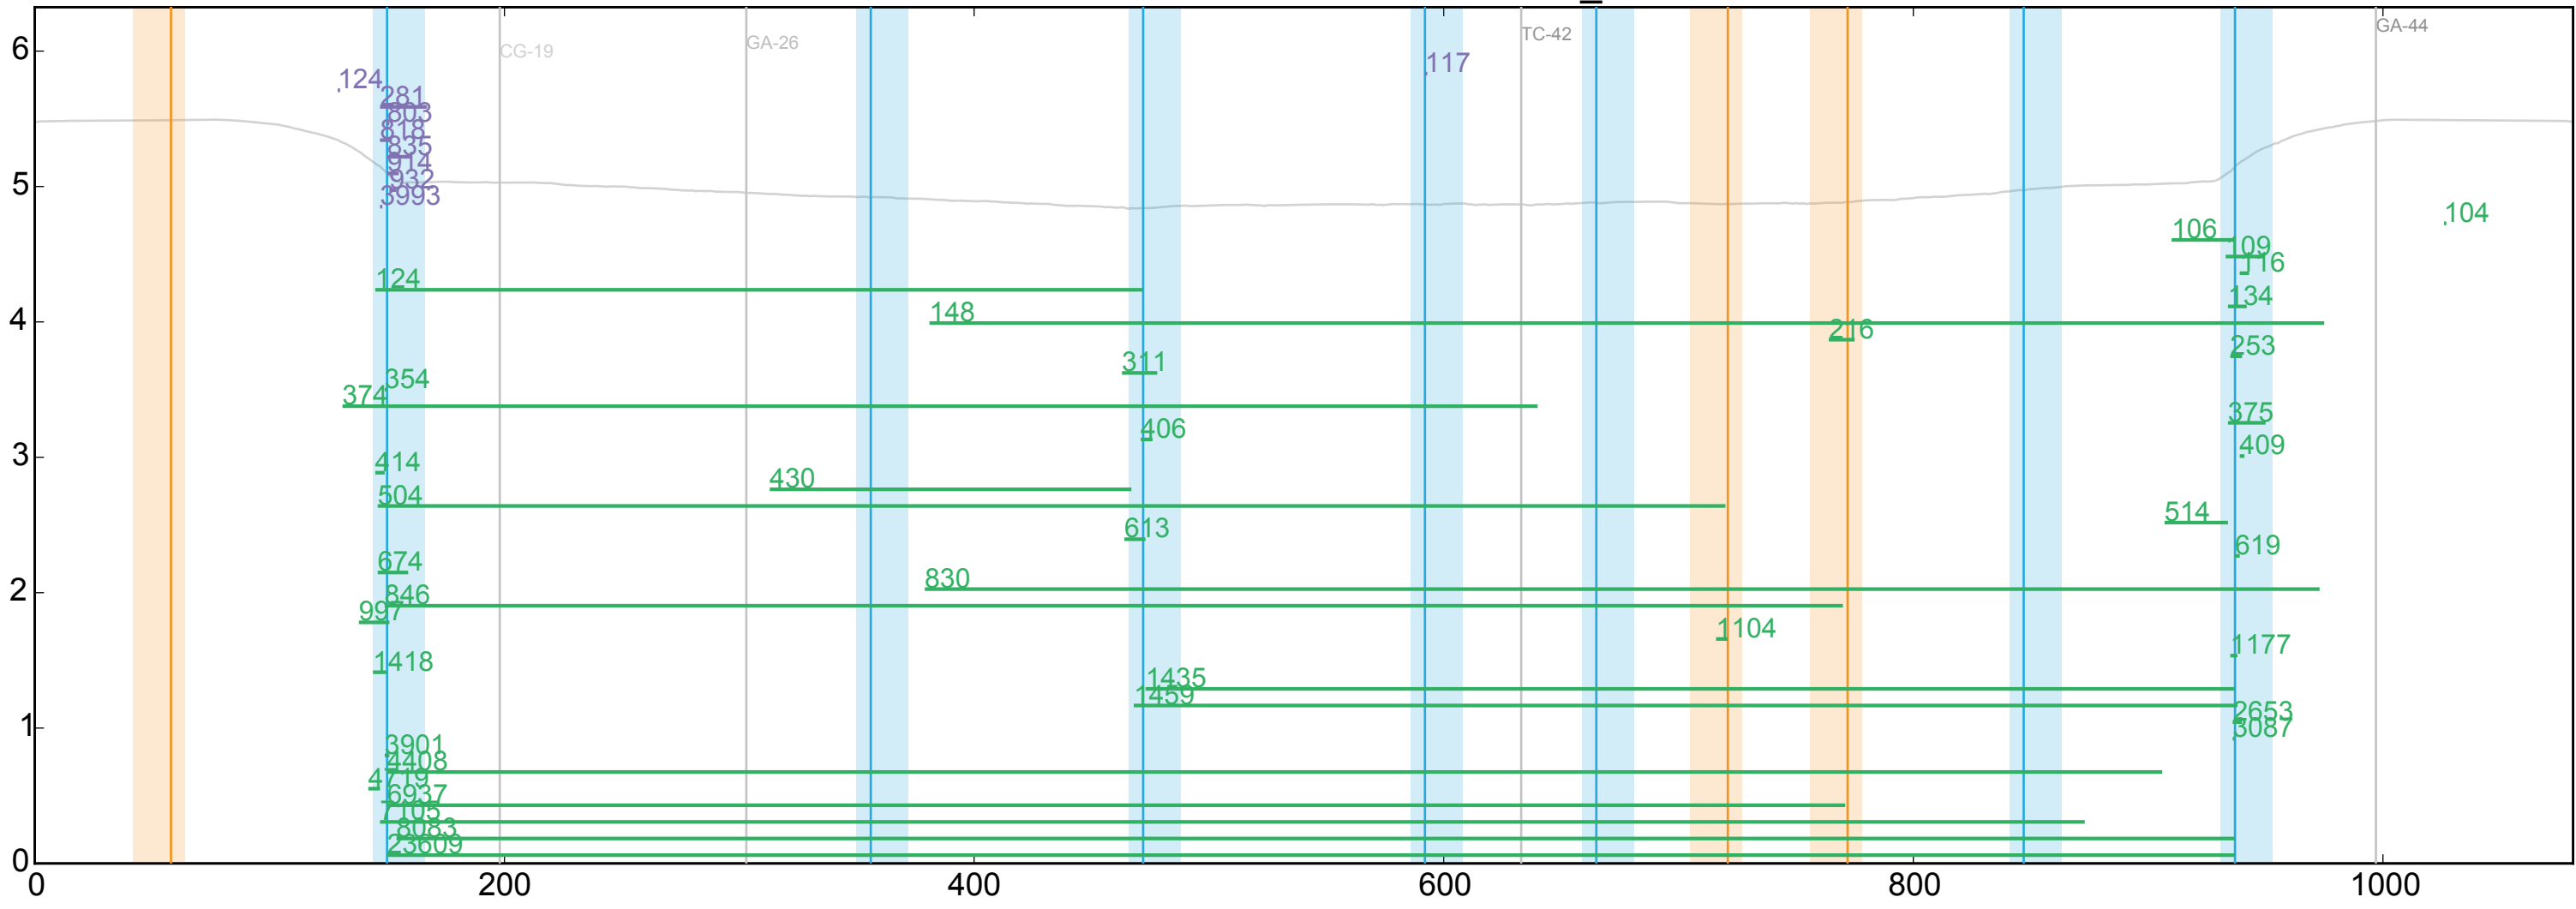

WT ENSDARG00000015567\_2

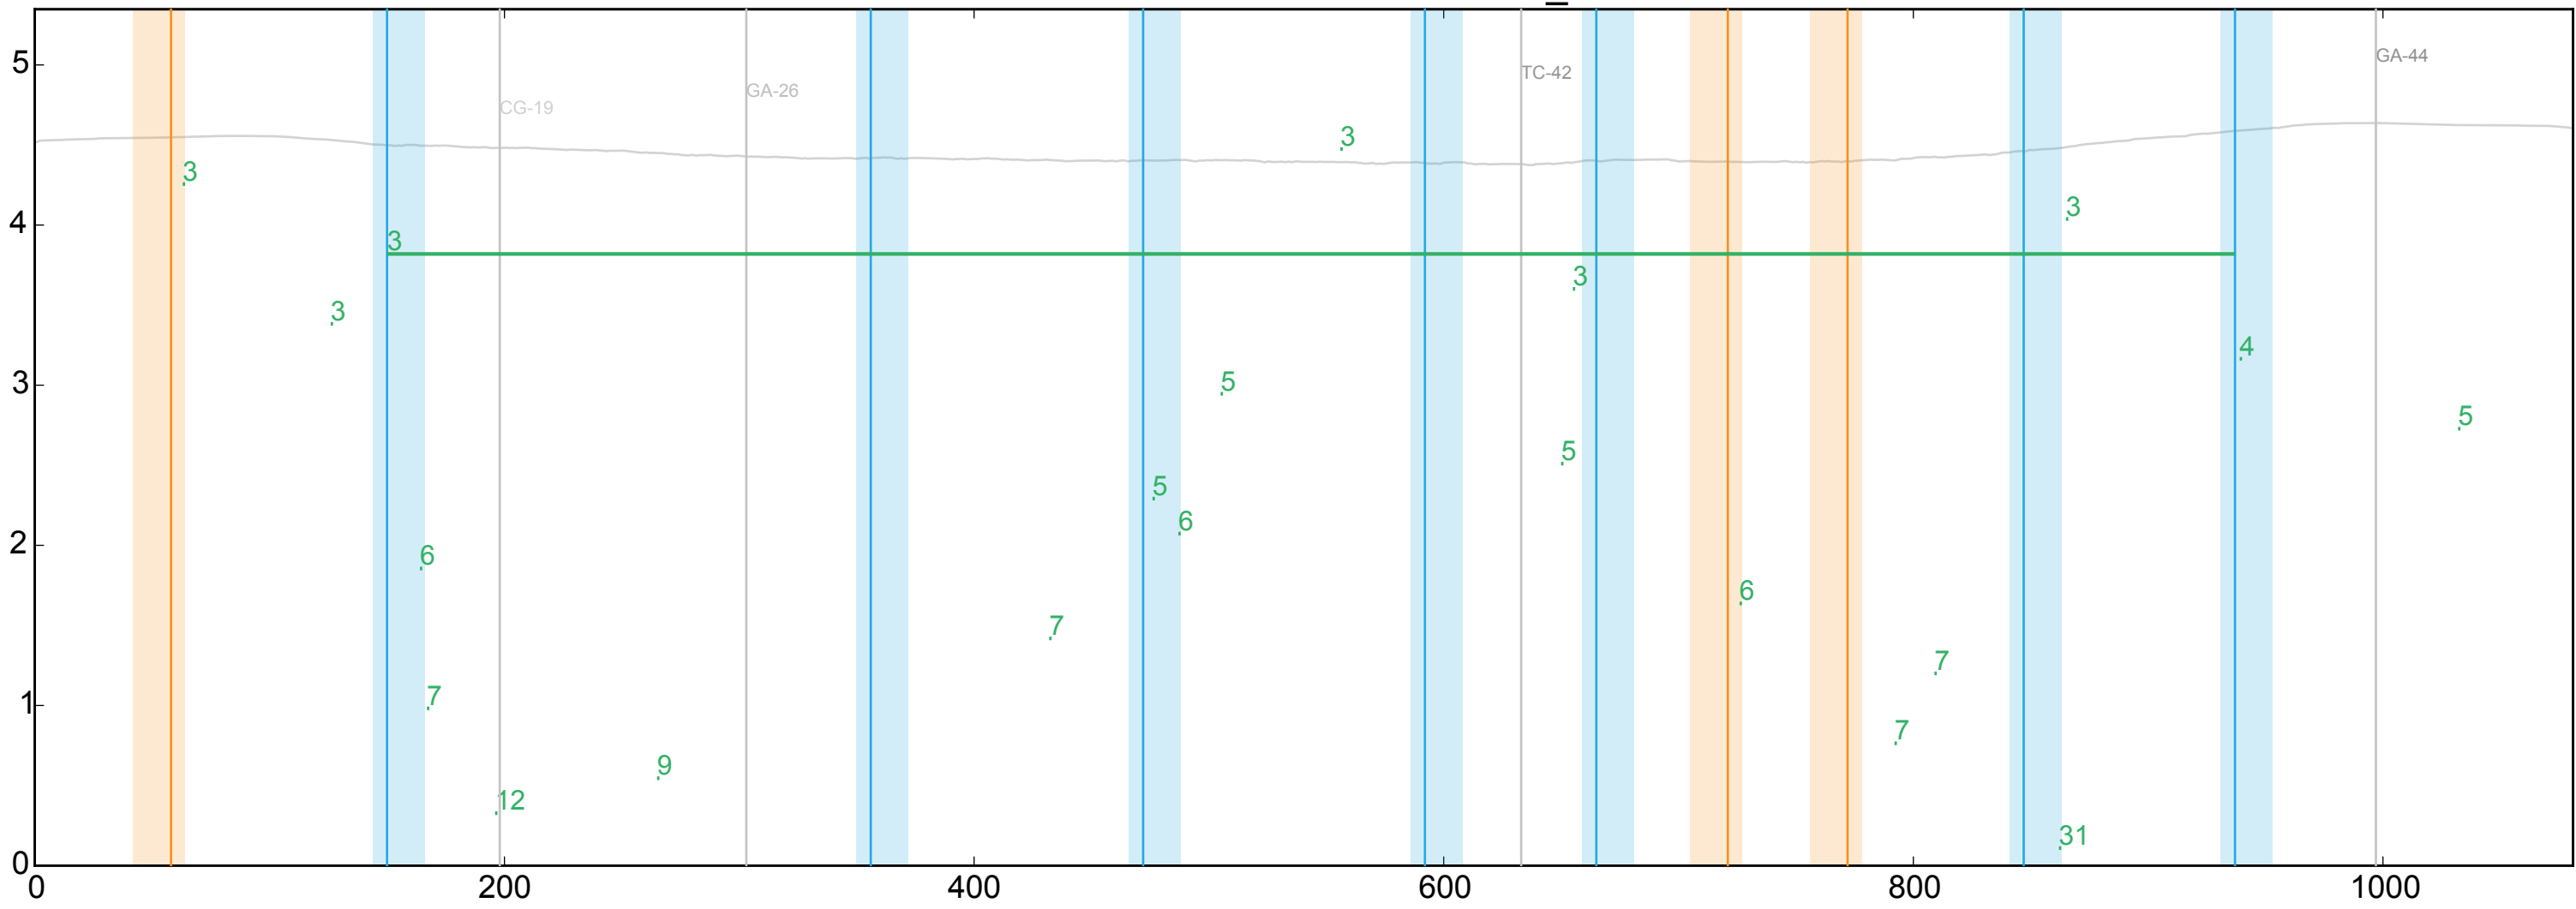

Mutant ENSDARG00000088655\_7

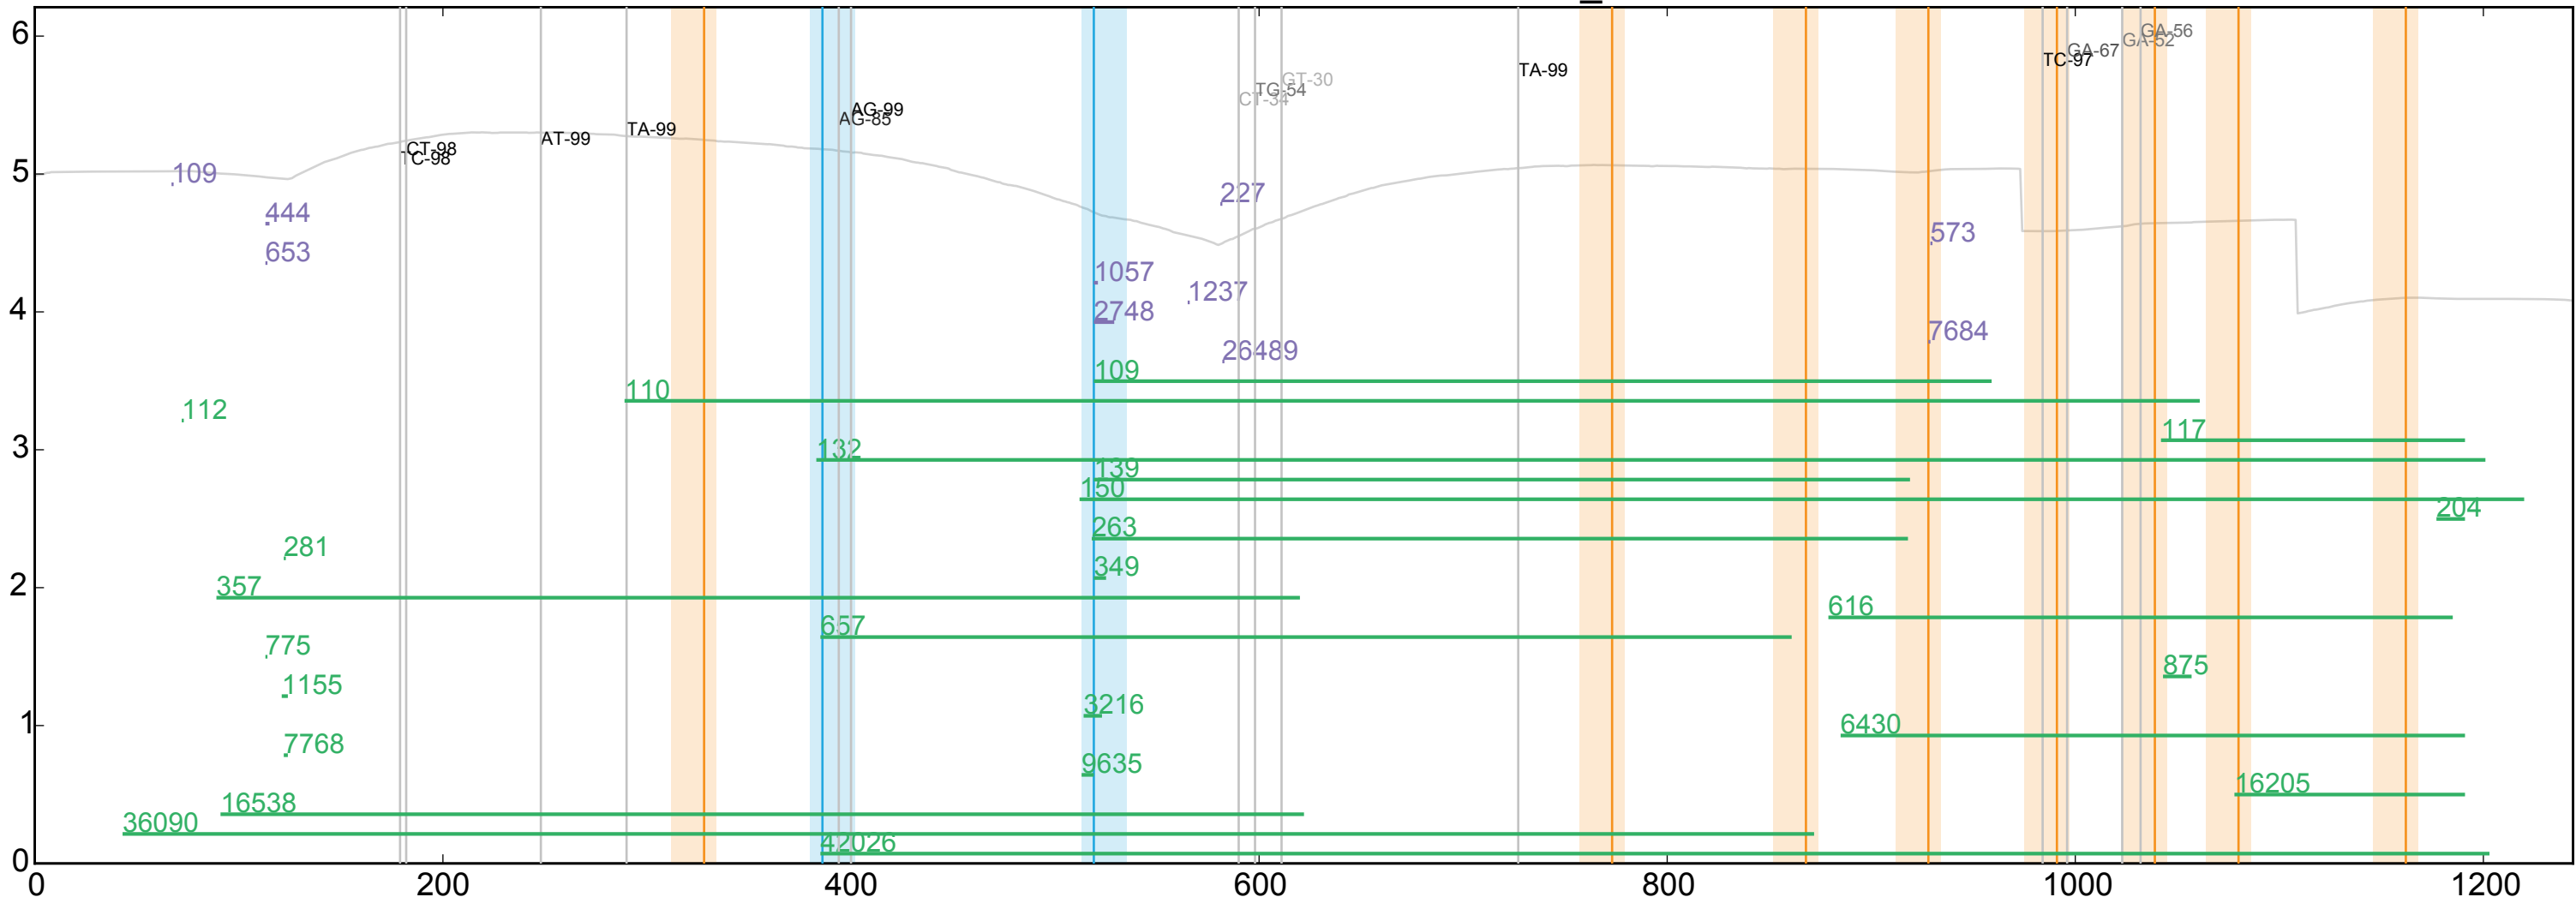

WT ENSDARG00000088655\_7

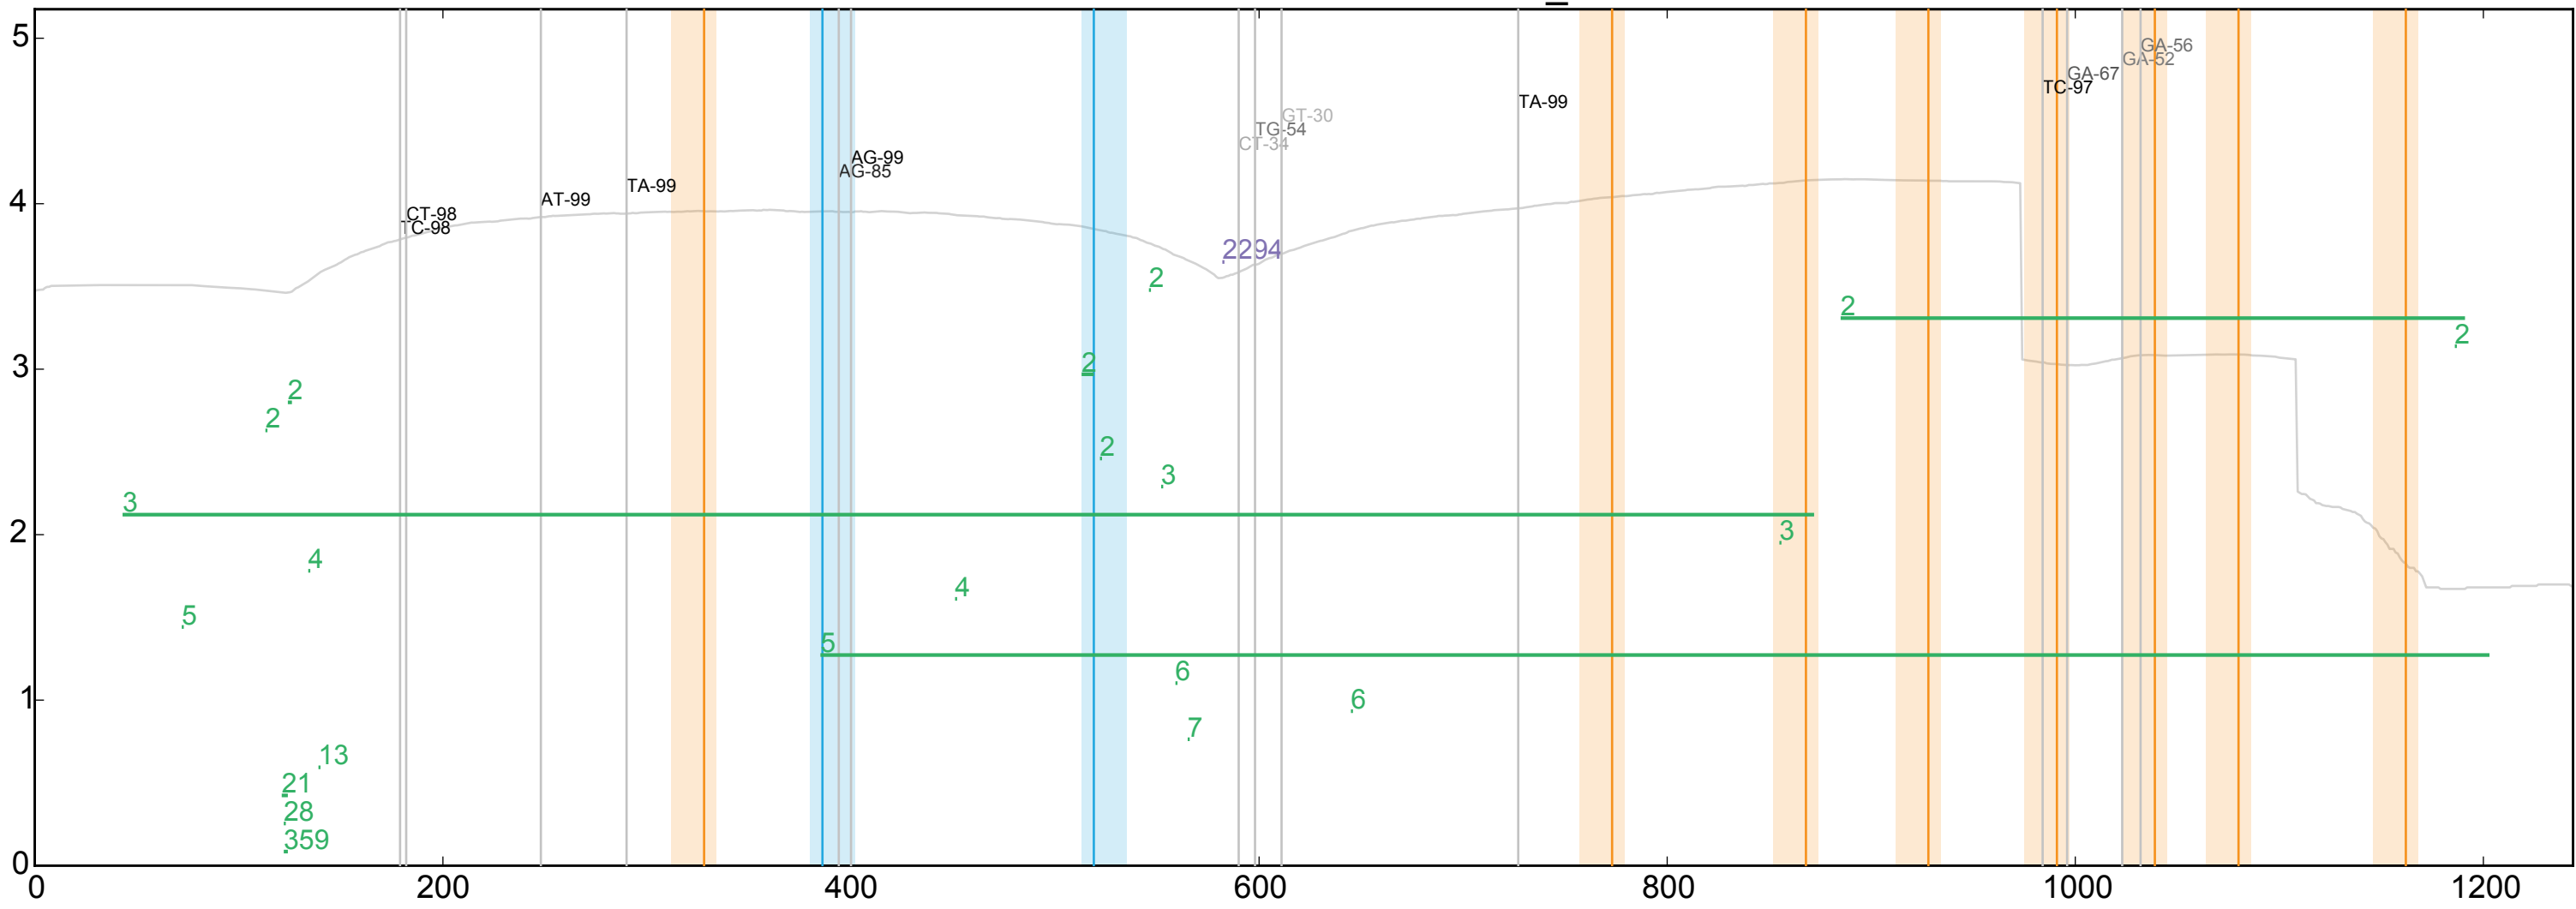

Mutant ENSDARG00000091481\_0

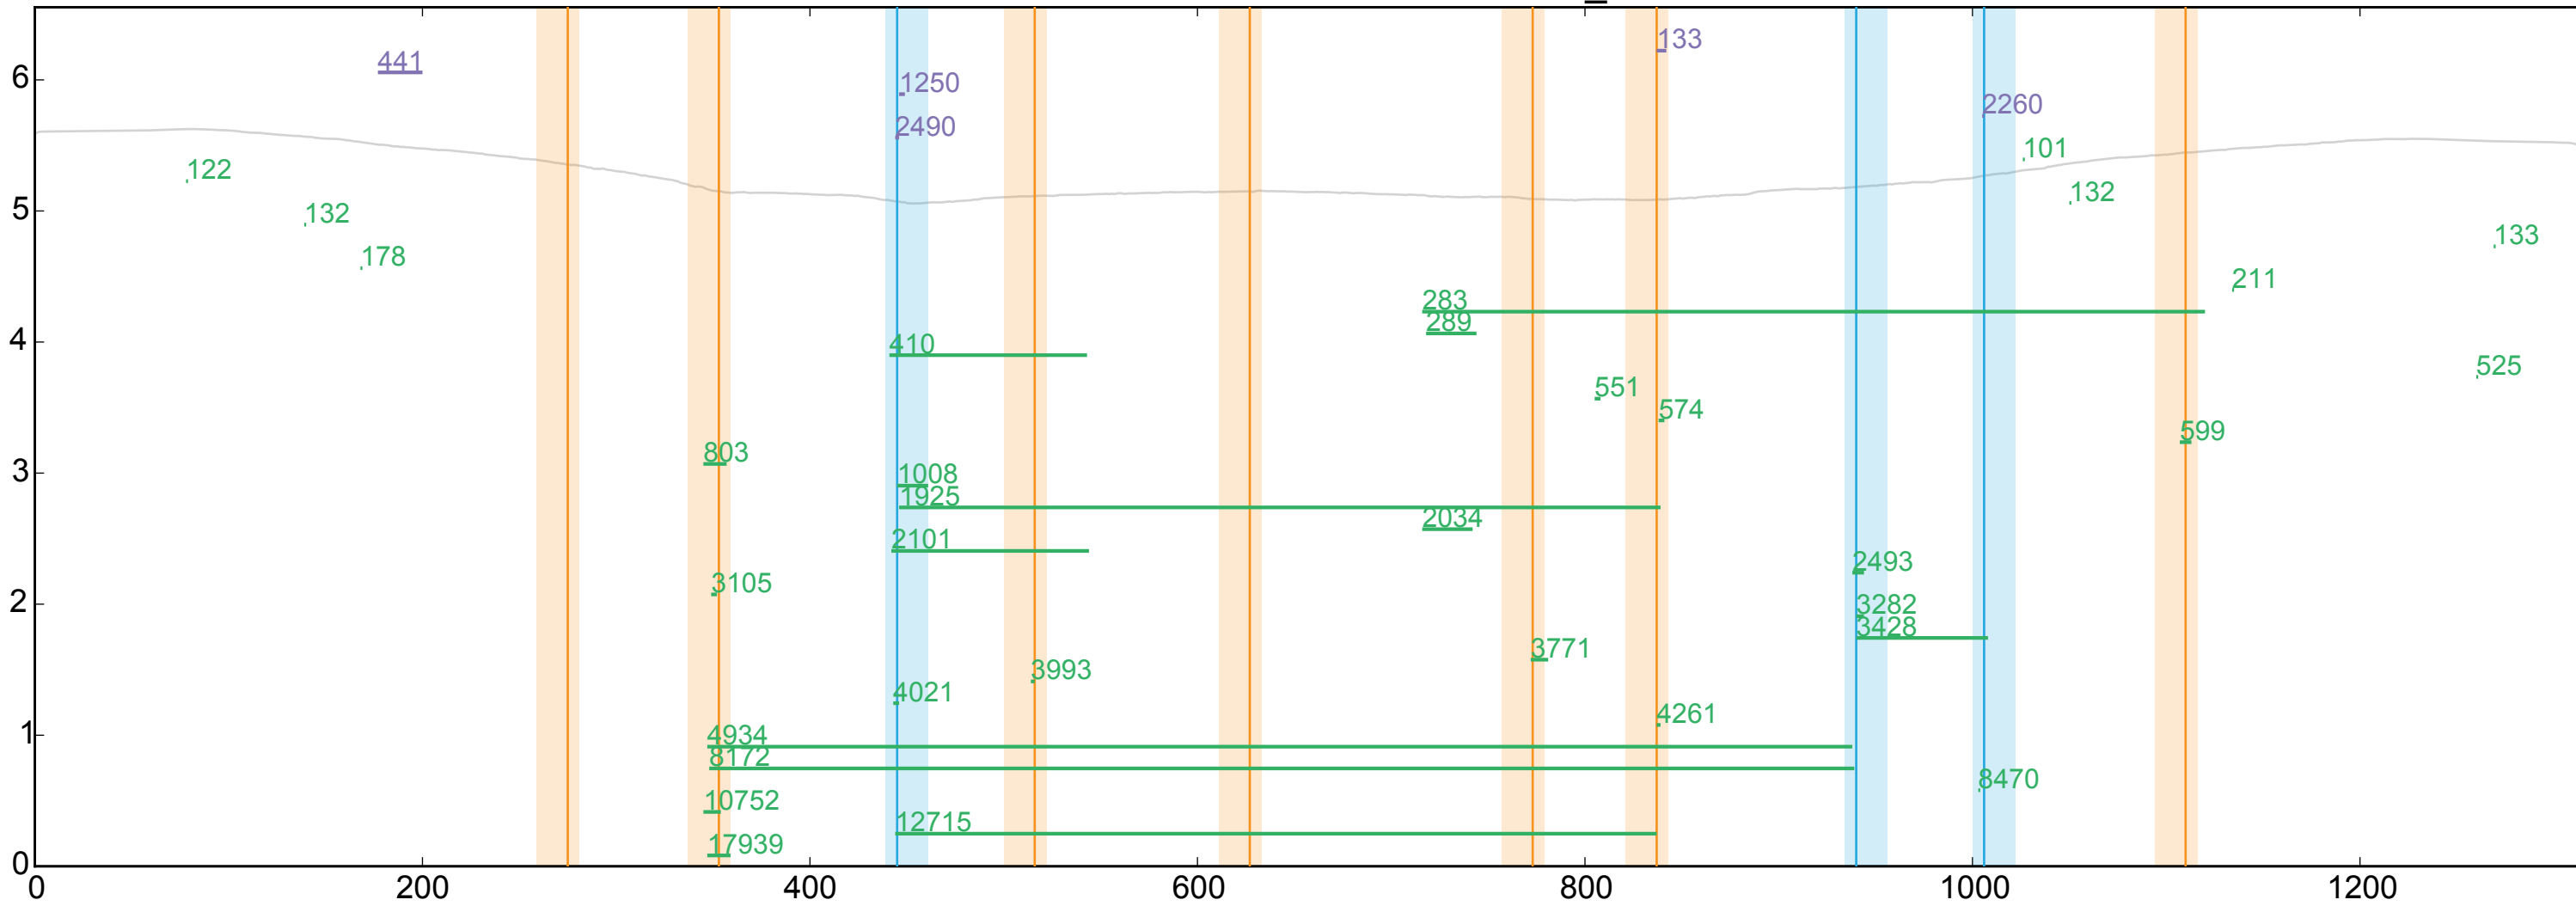

WT ENSDARG00000091481\_0

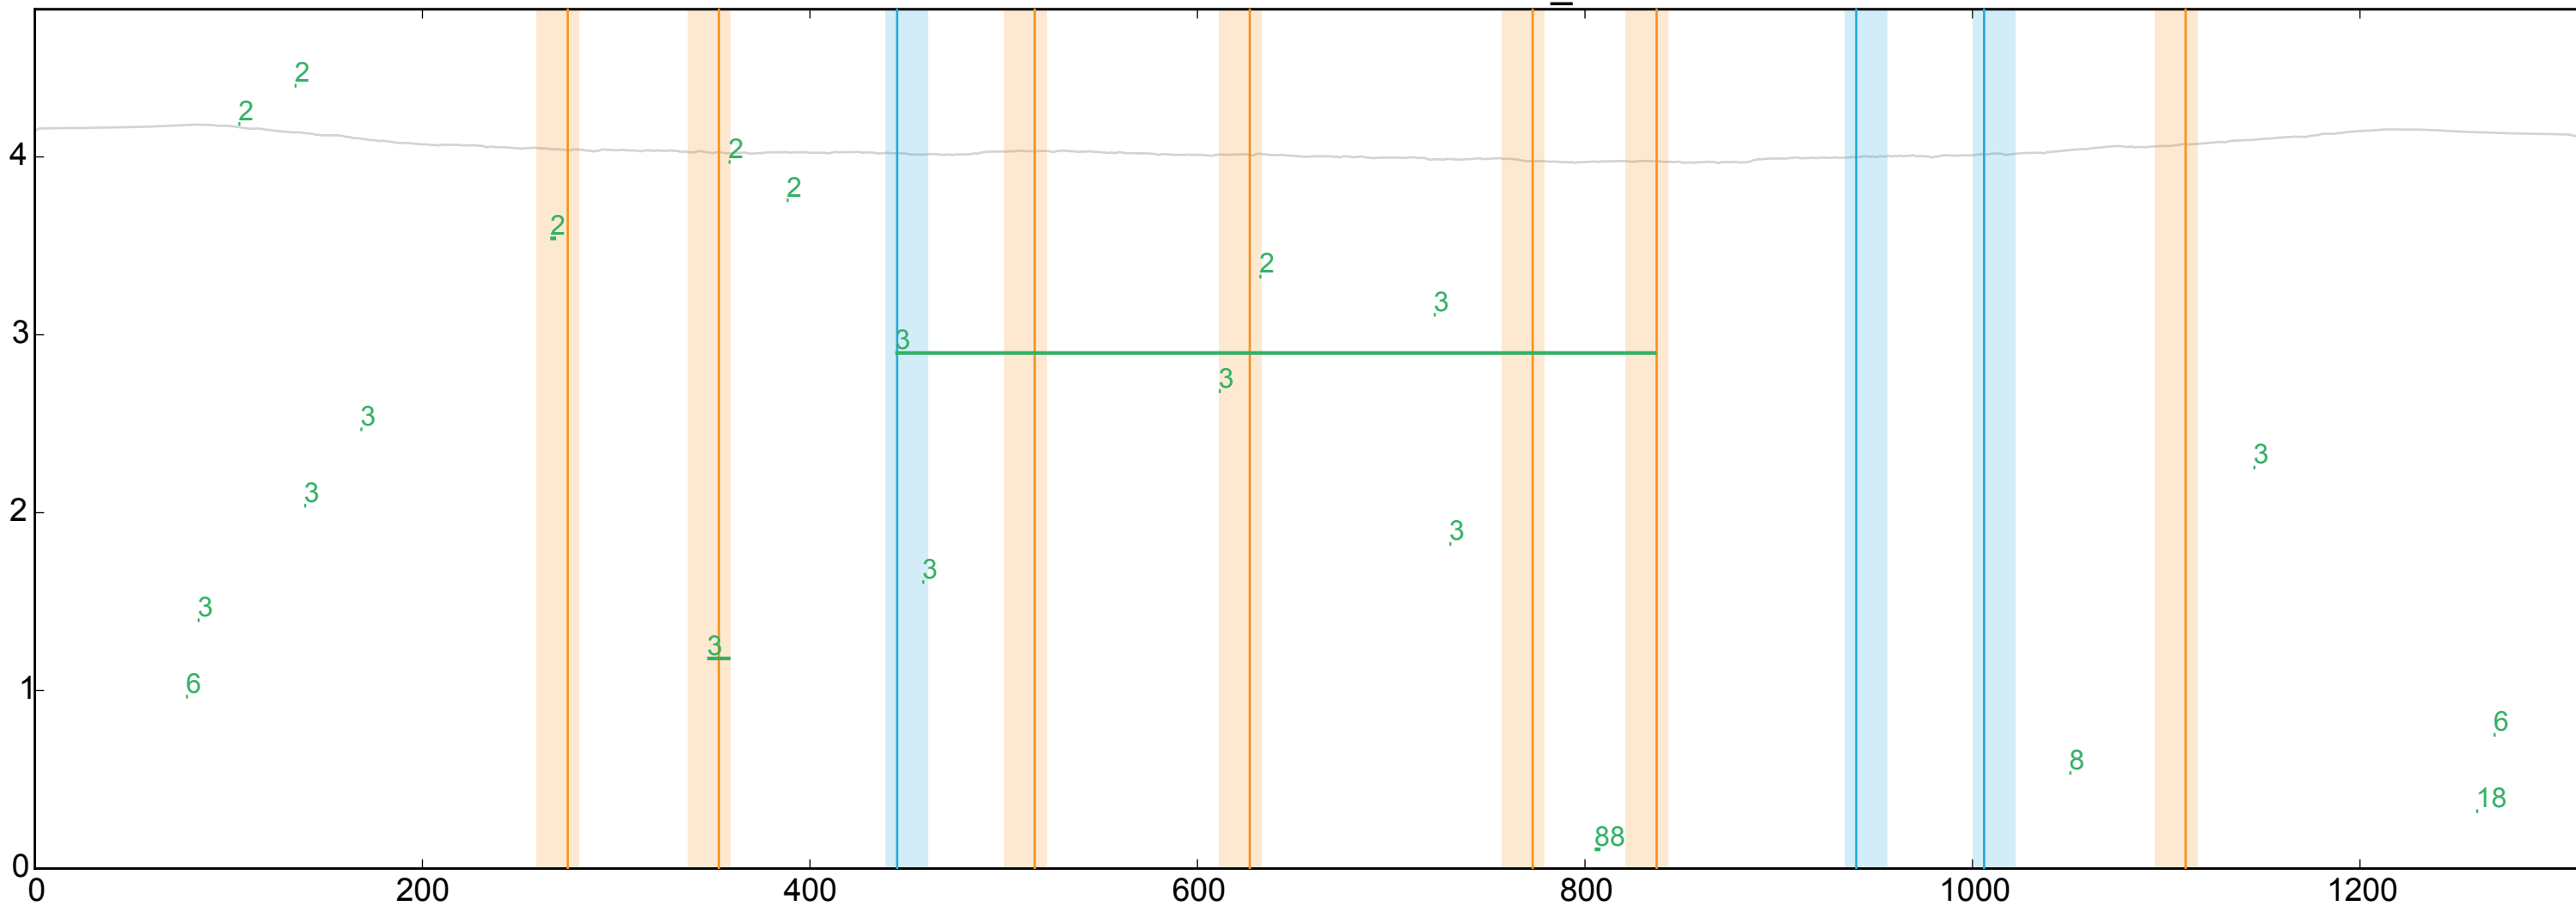

Mutant ENSDARG00000079348\_0

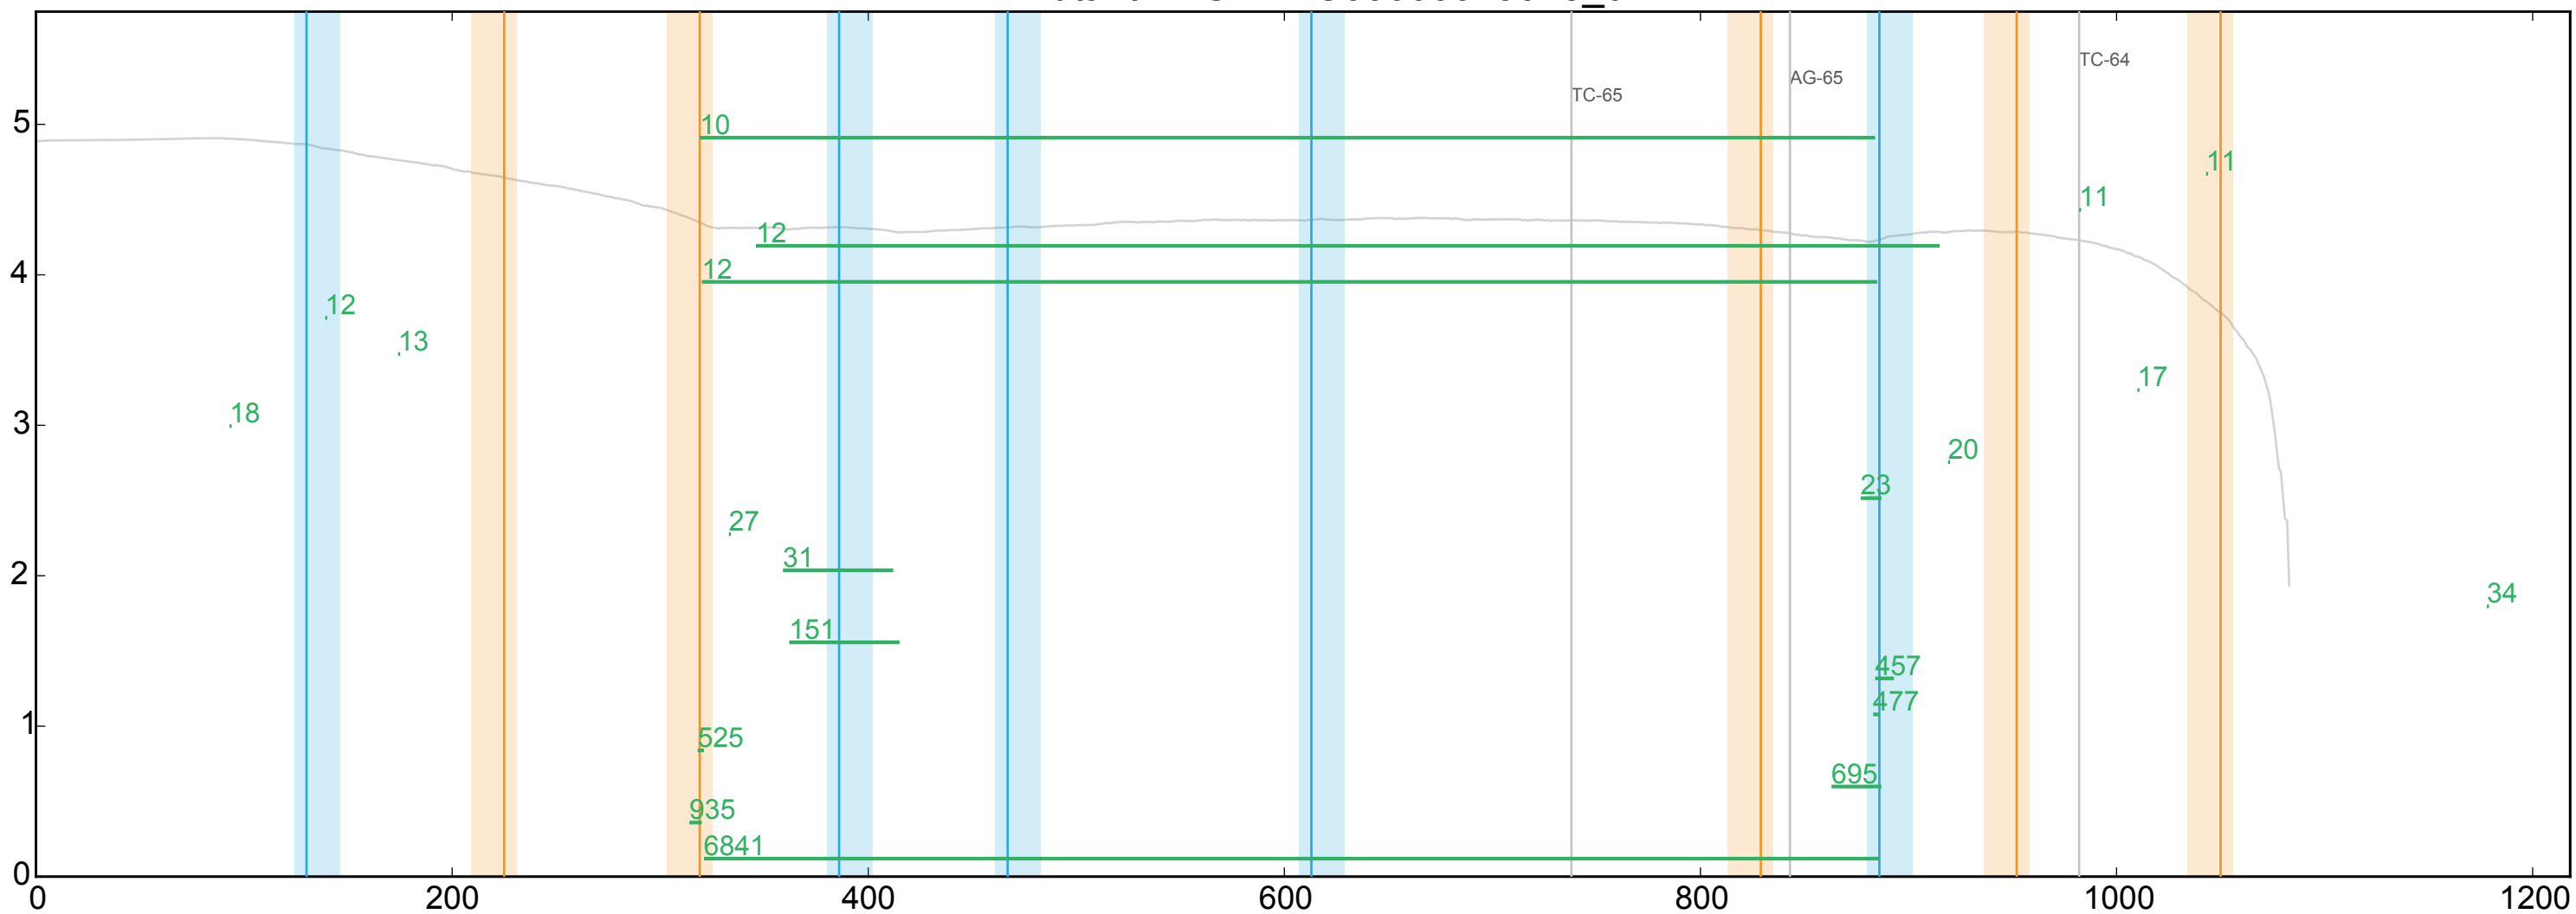

WT ENSDARG00000079348\_0

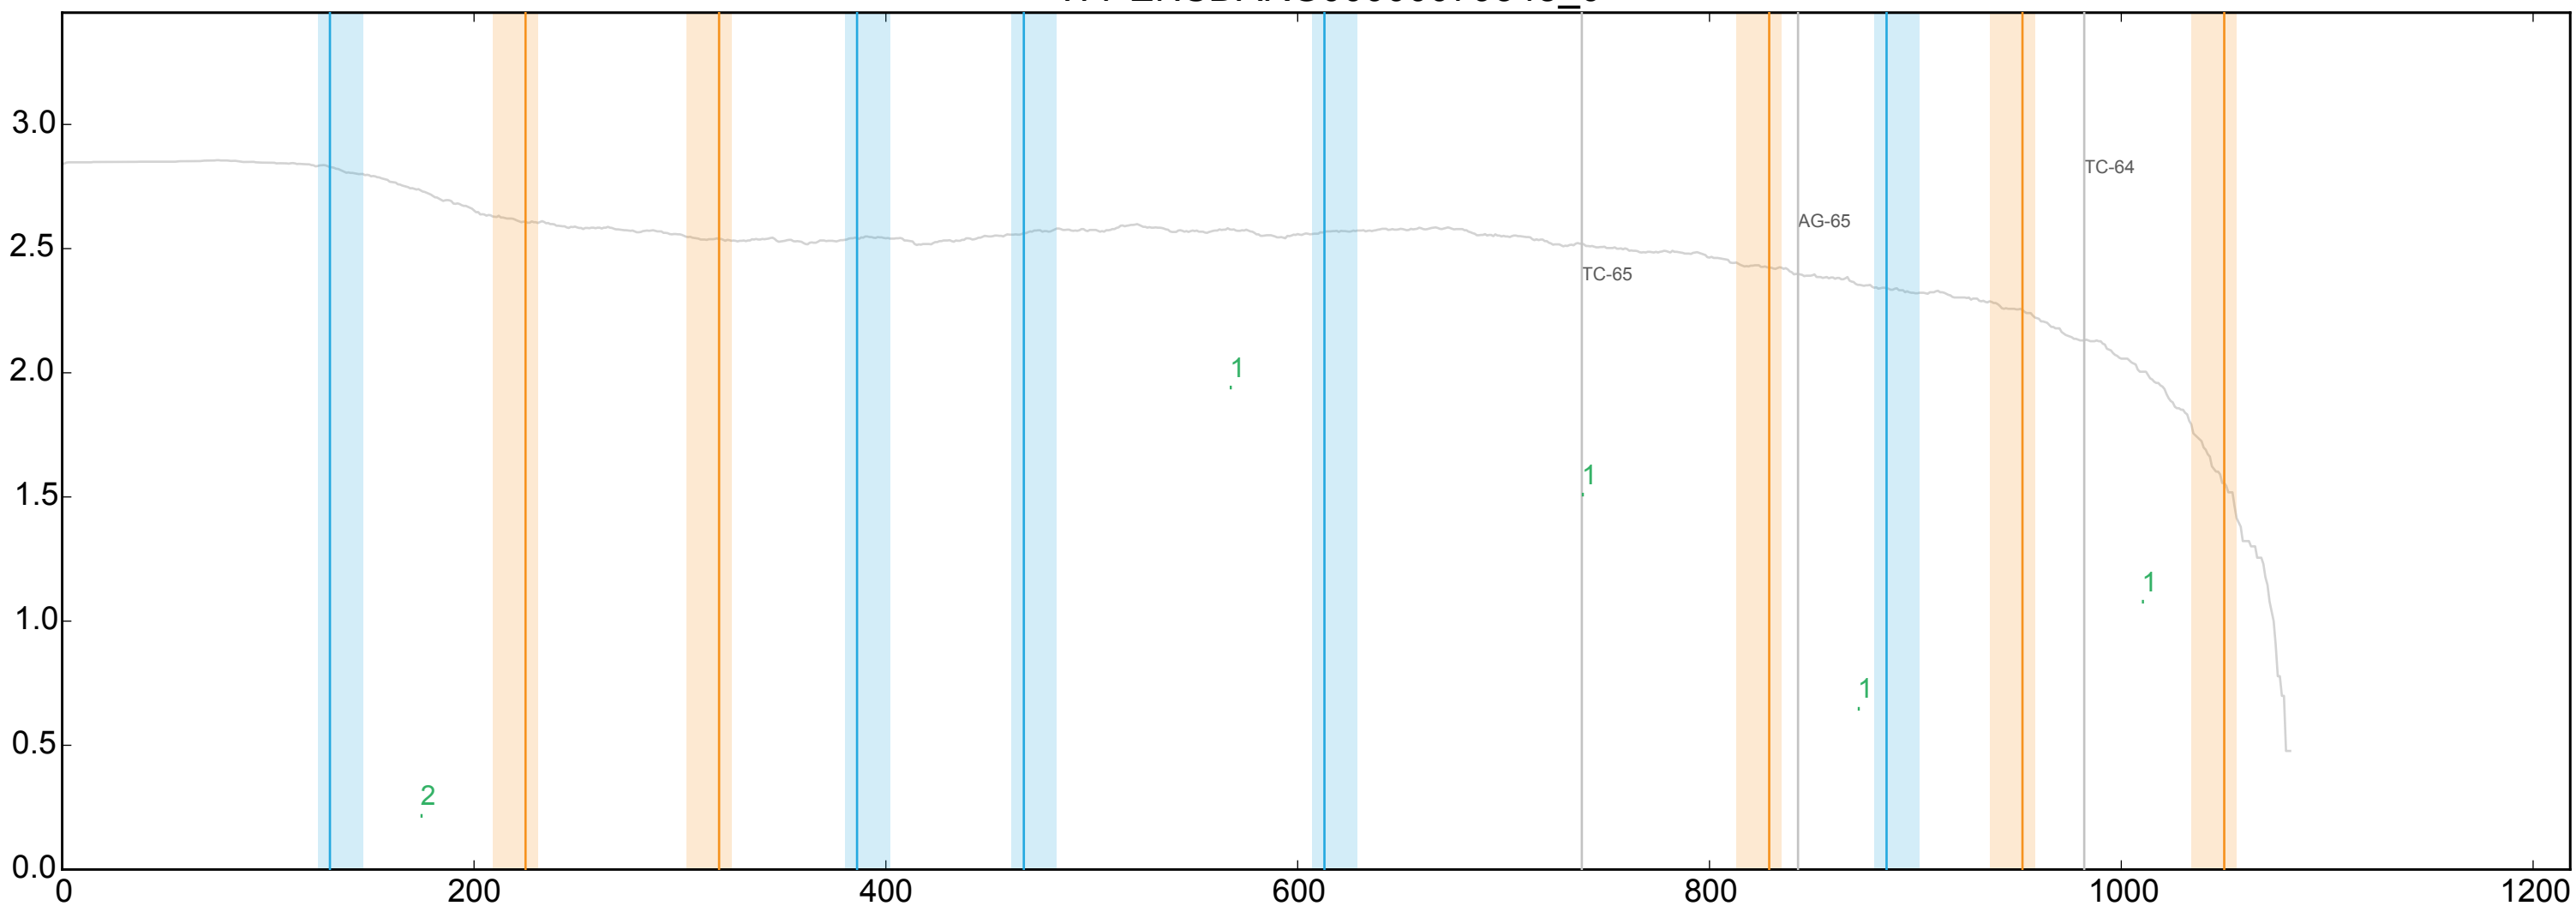



Mutant ENSDARG00000071497\_2

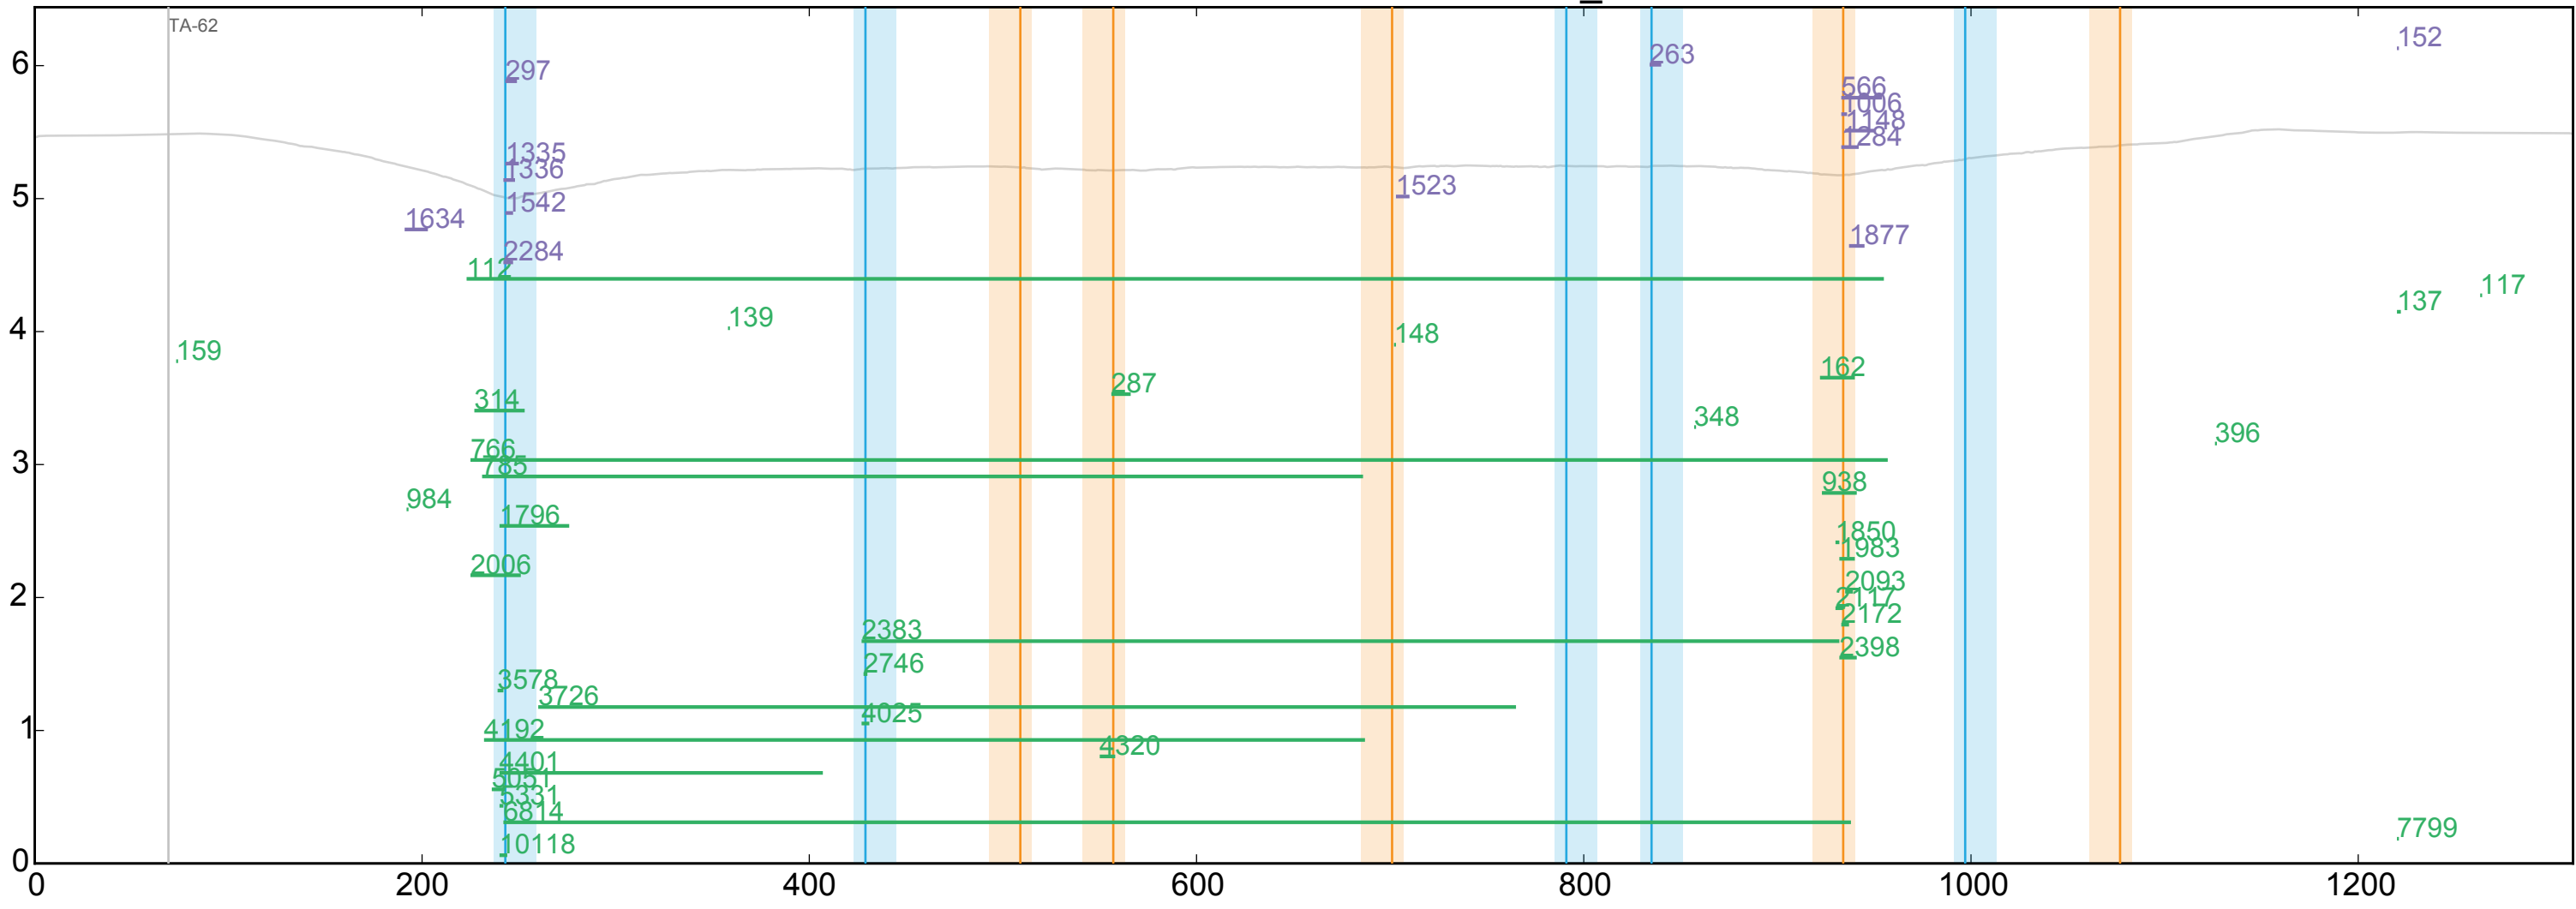

WT ENSDARG00000071497\_2

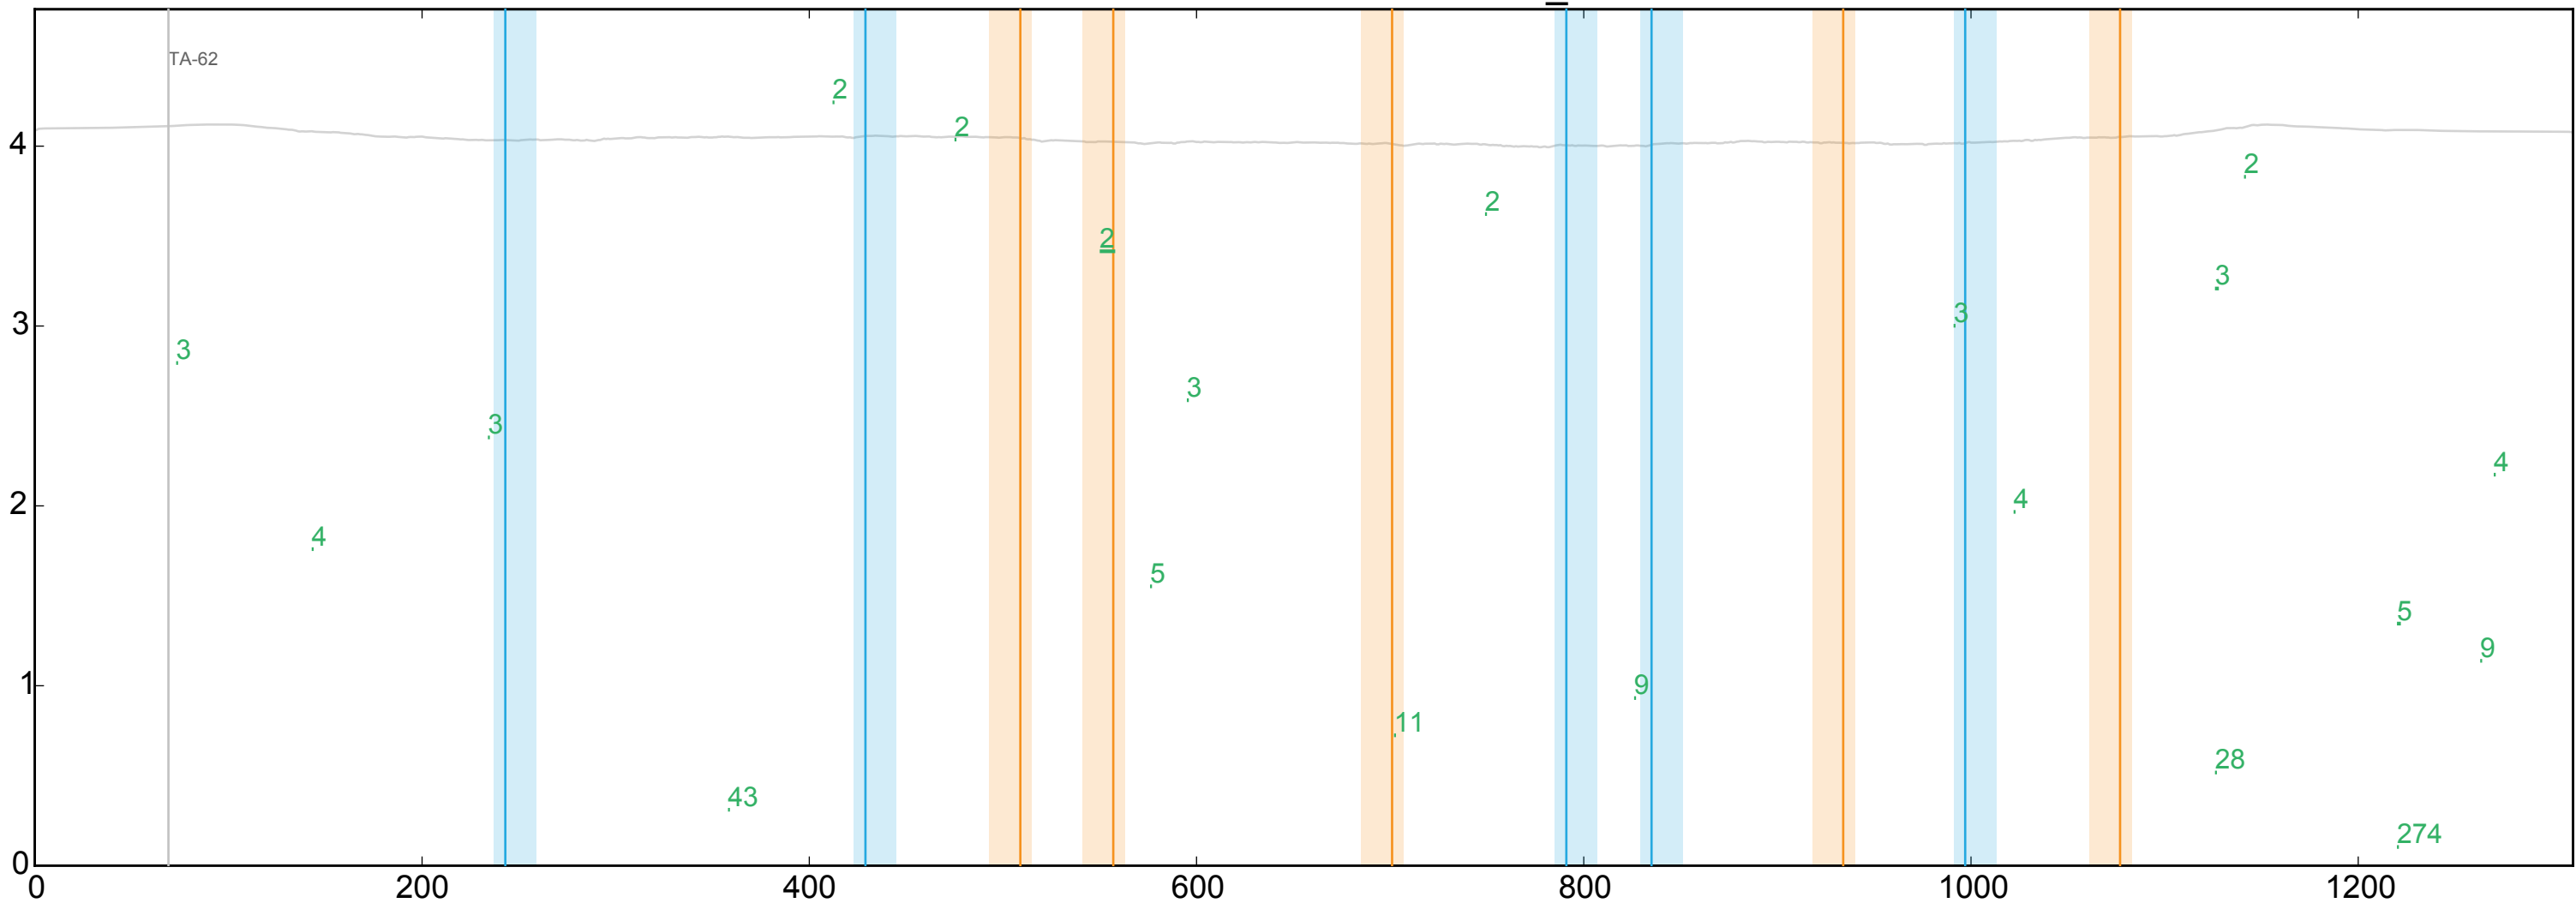

Supplement: NIHMS711531-supplement-2.pdf [file NIHMS711531-supplement-2.pdf]
