# Supplementary material
Source: PubMed Central journal article supplement (PMC4589495)

Mutant ENSDARG00000062976\_8

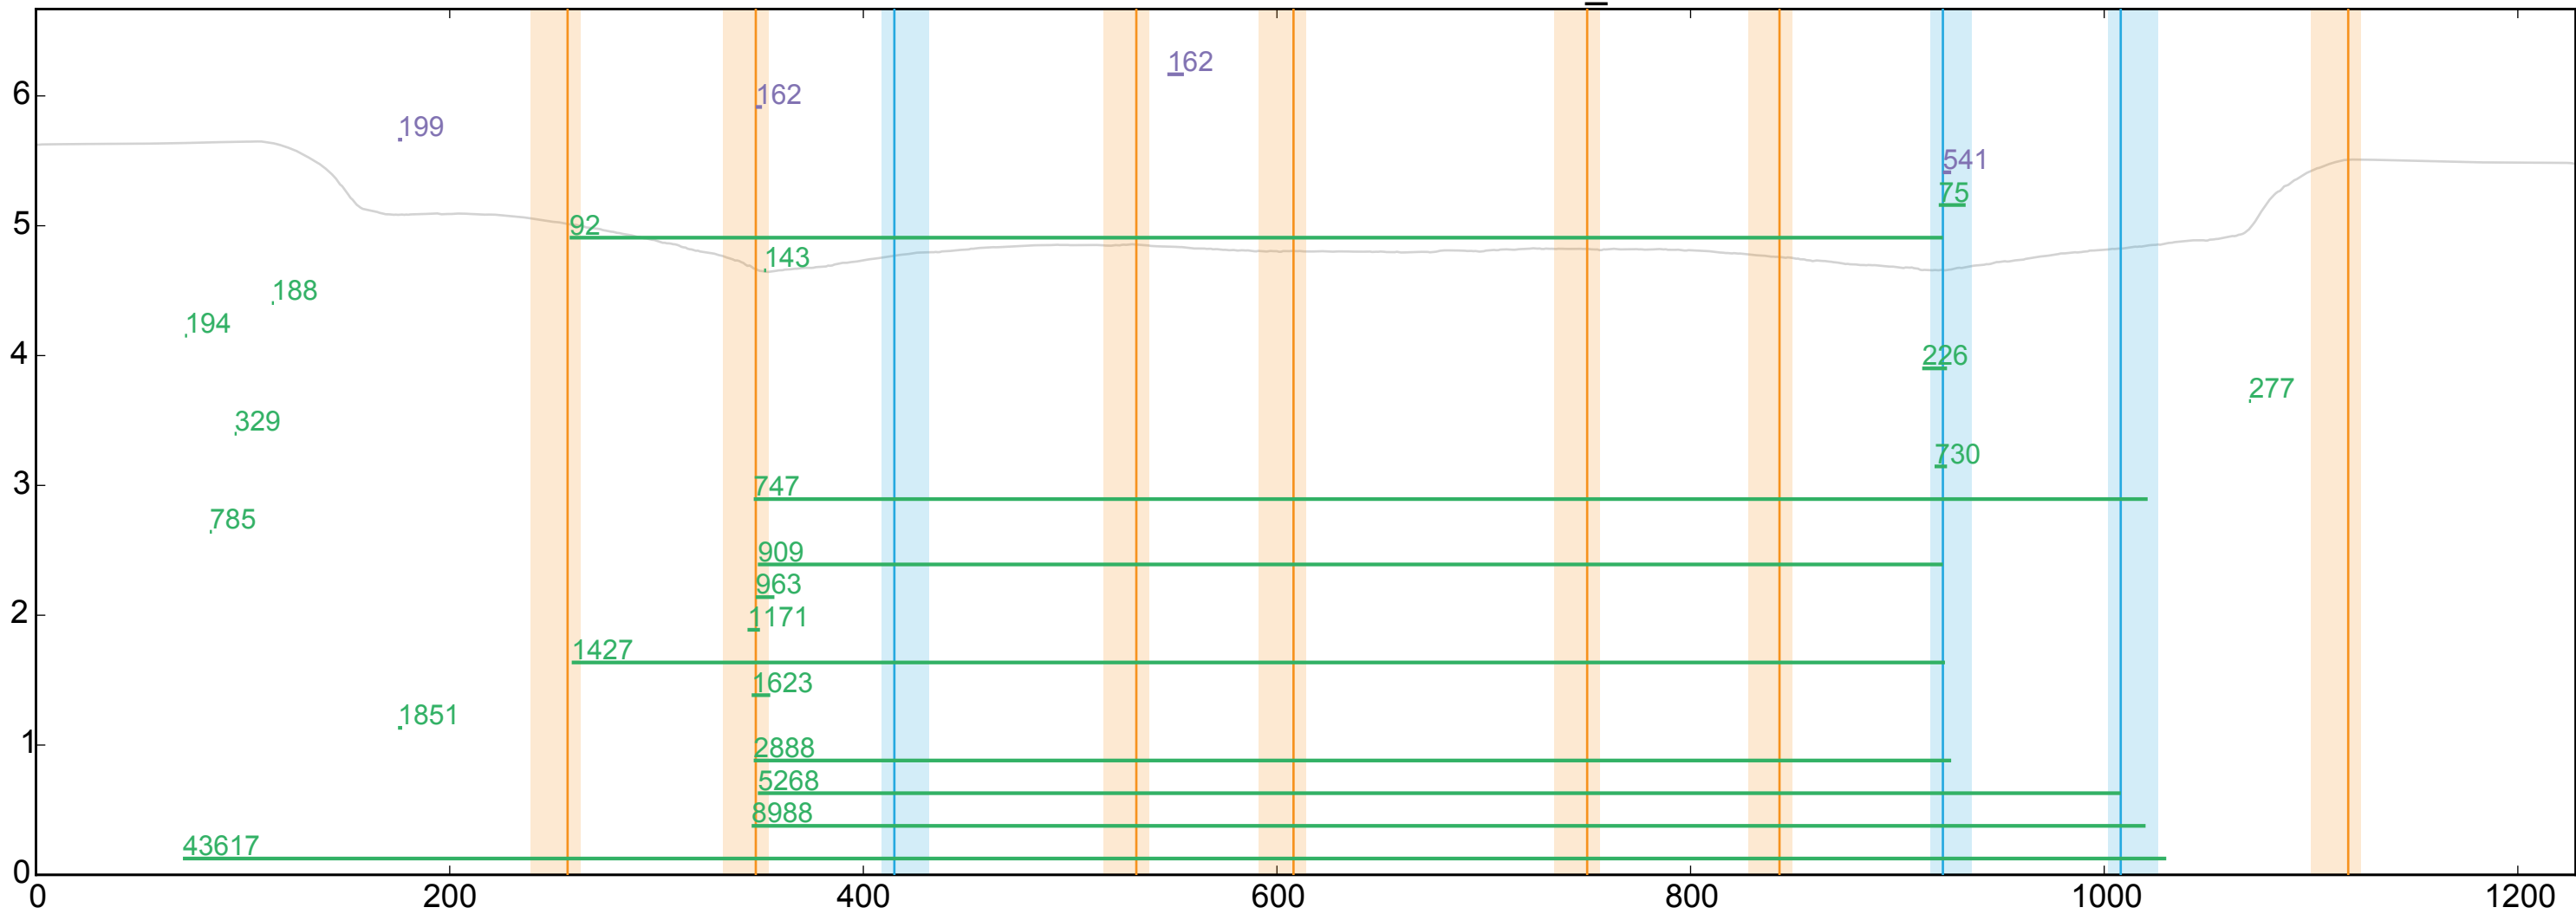

WT ENSDARG00000062976\_8

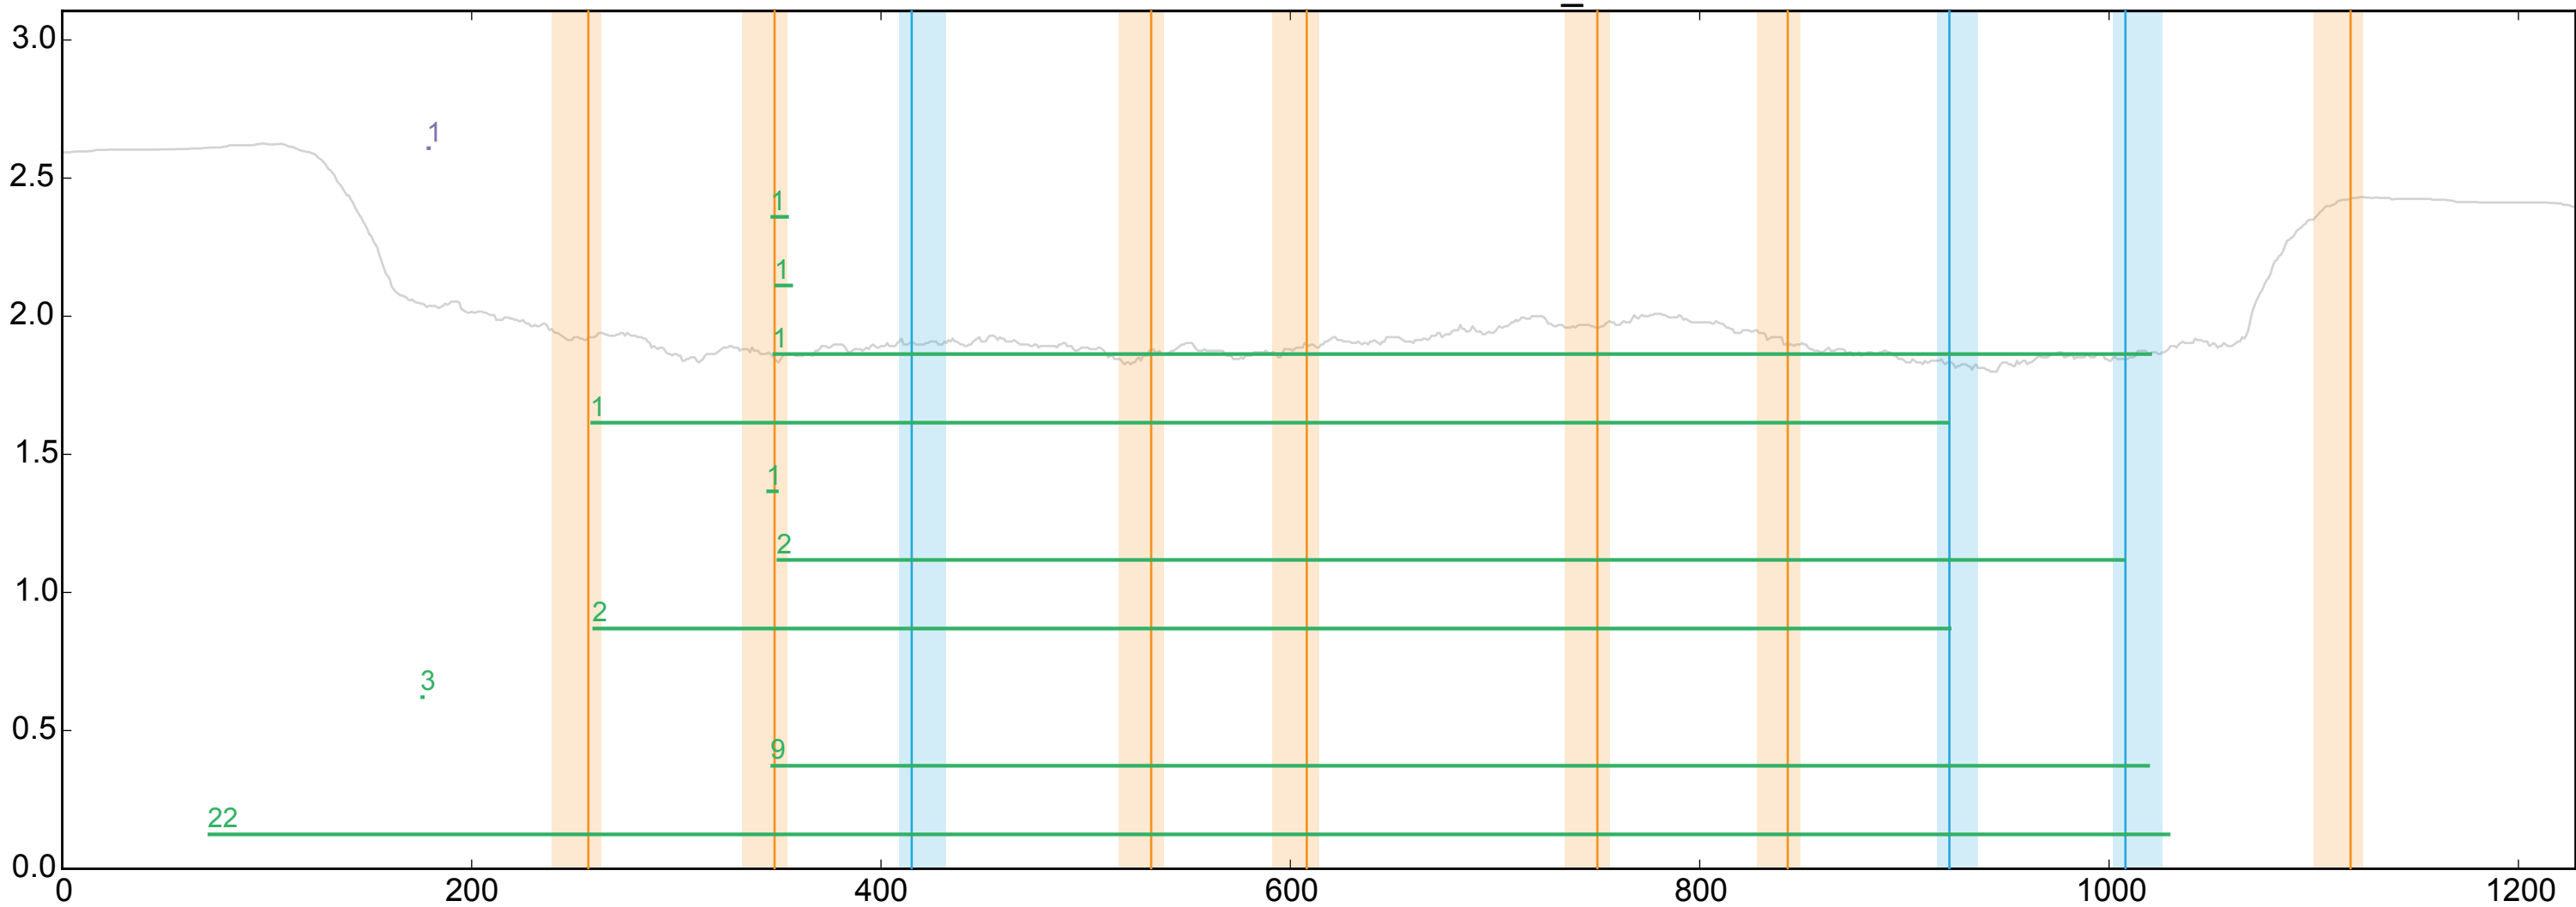

Mutant ENSDARG00000044098\_0

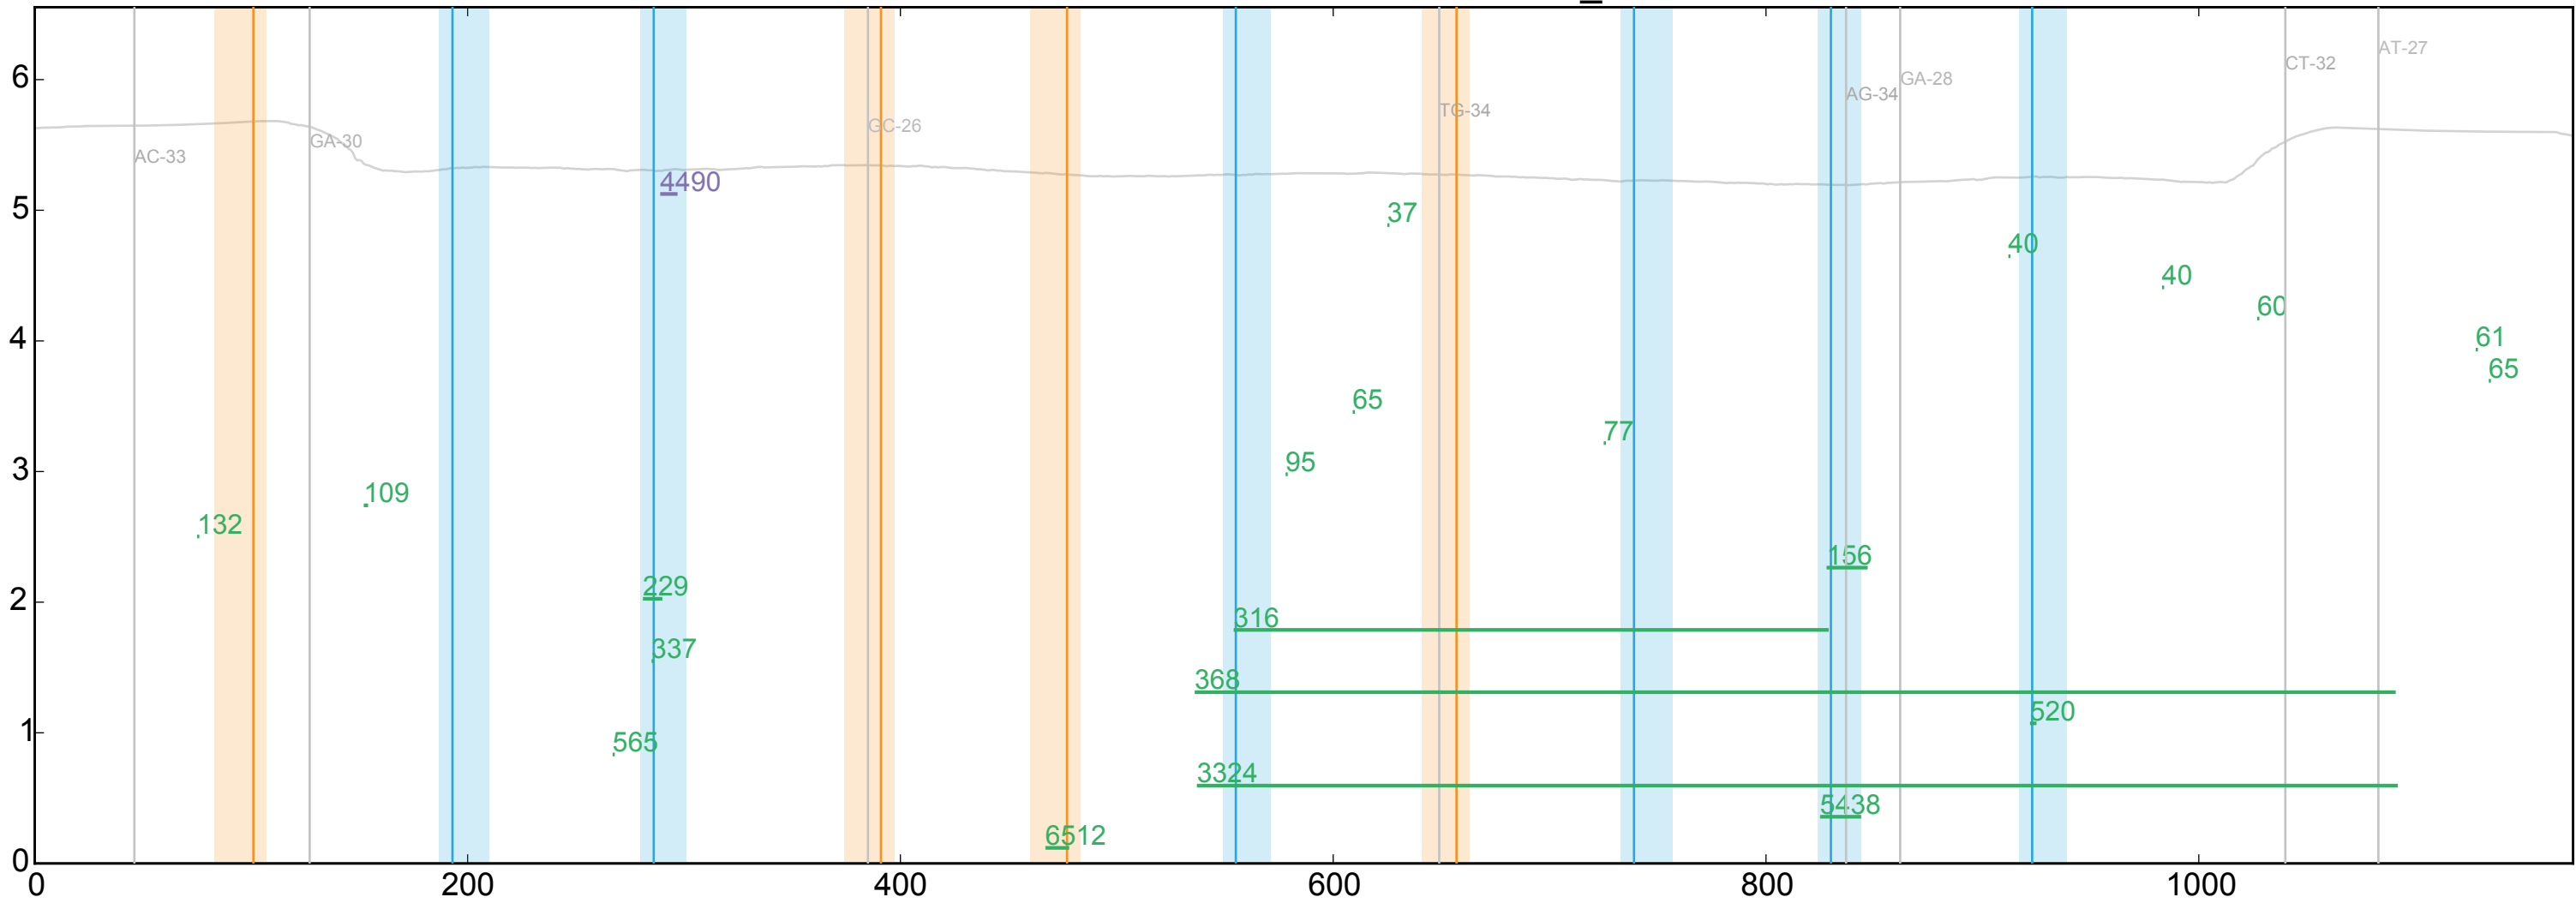

WT ENSDARG00000044098\_0

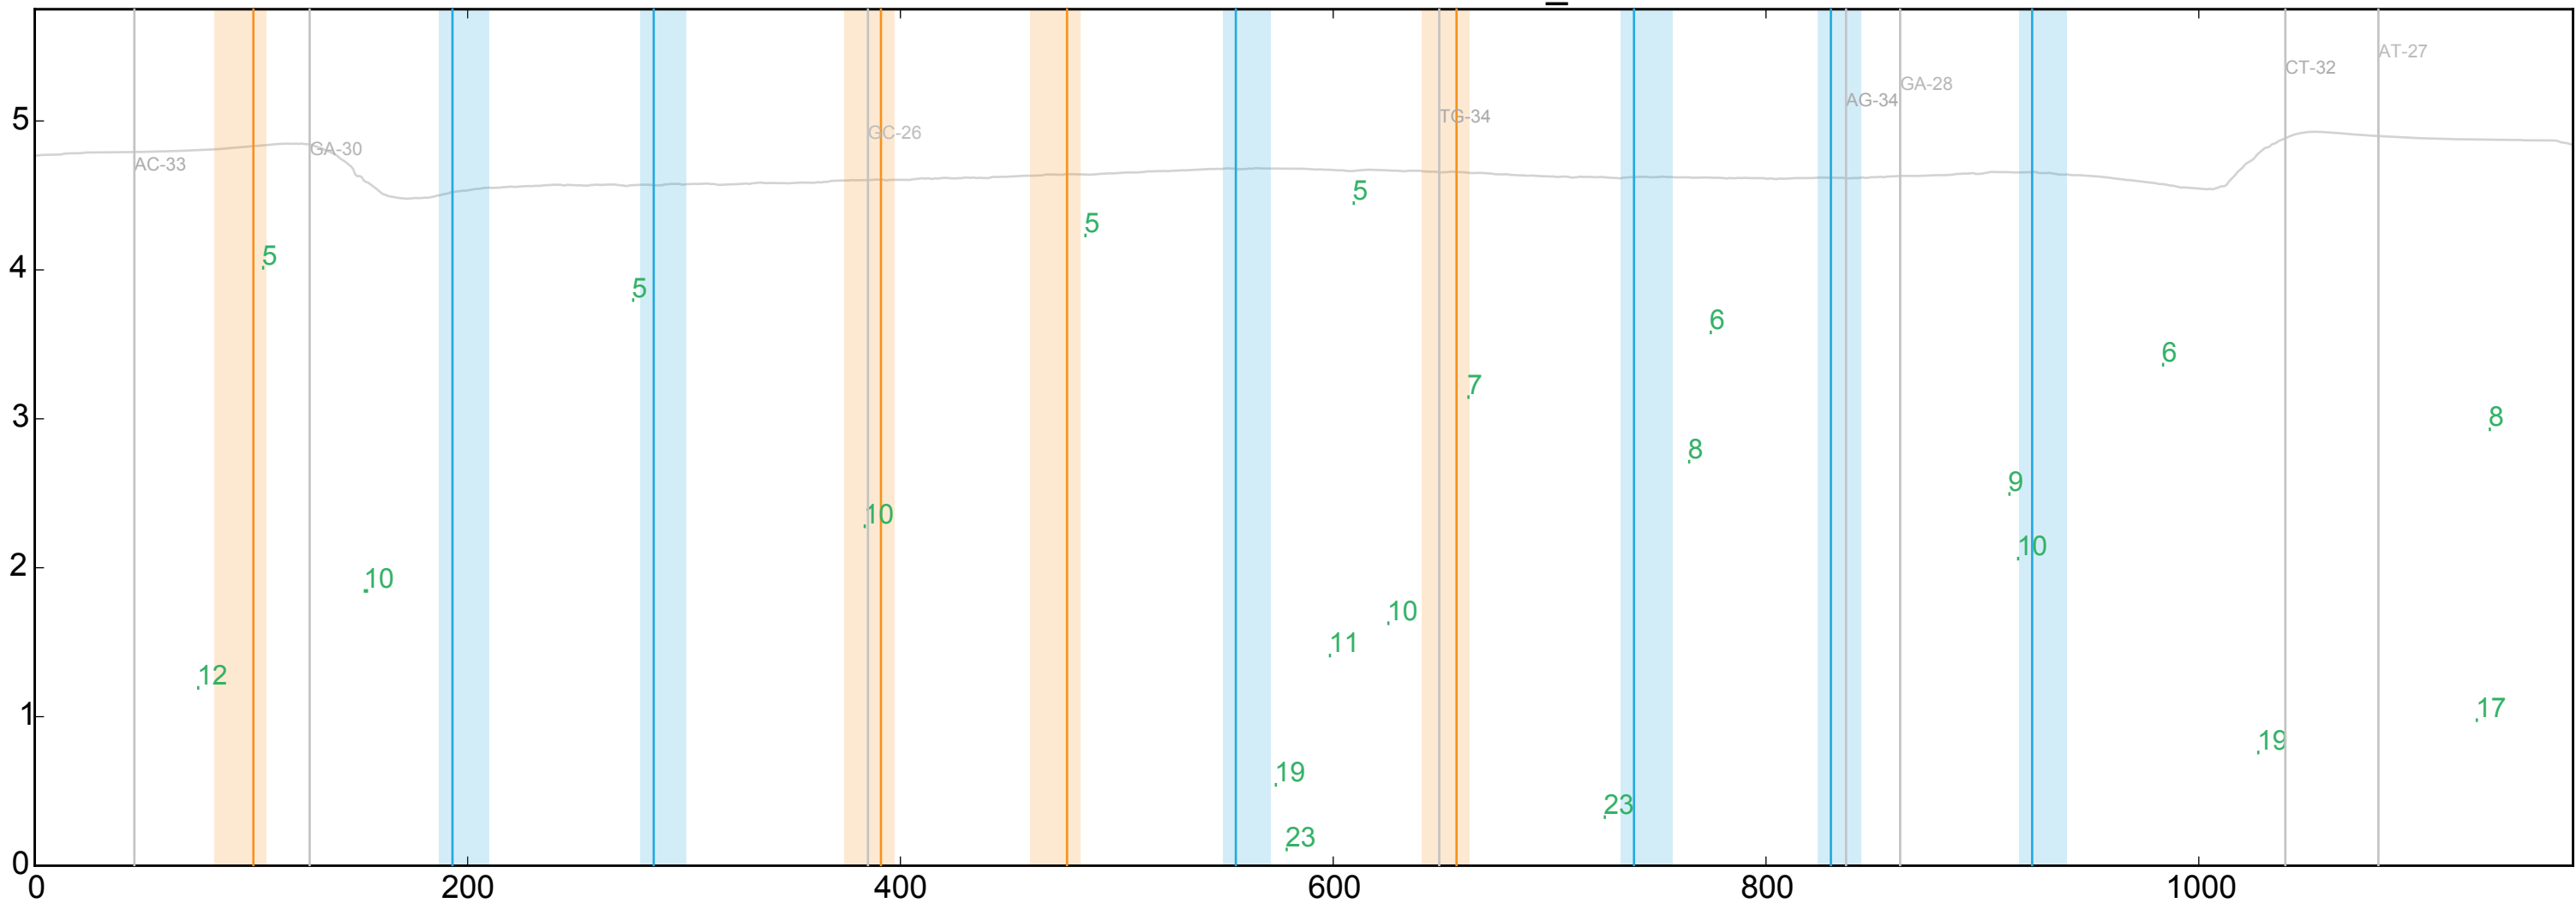

Mutant ENSDARG00000079348\_0

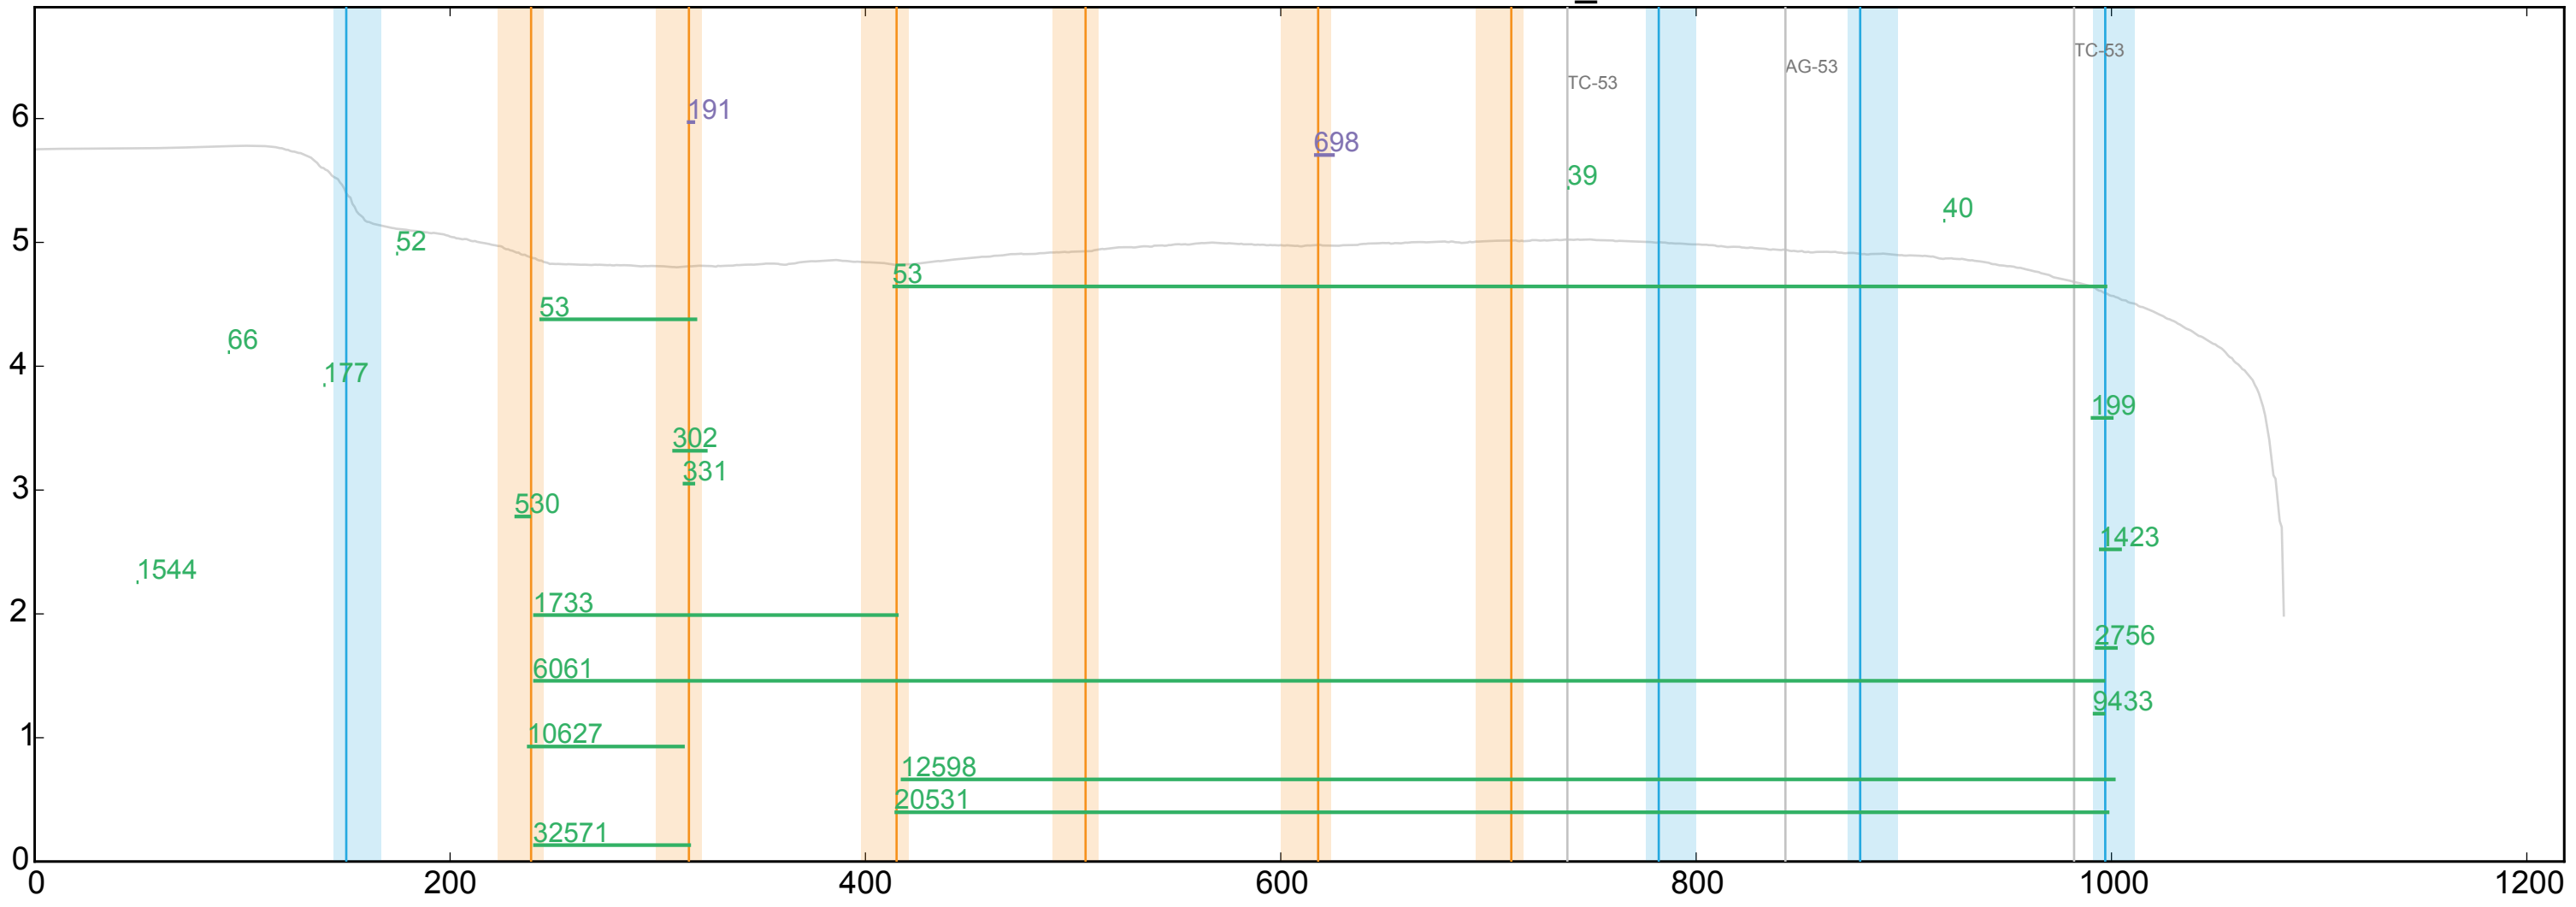

WT ENSDARG00000079348\_0

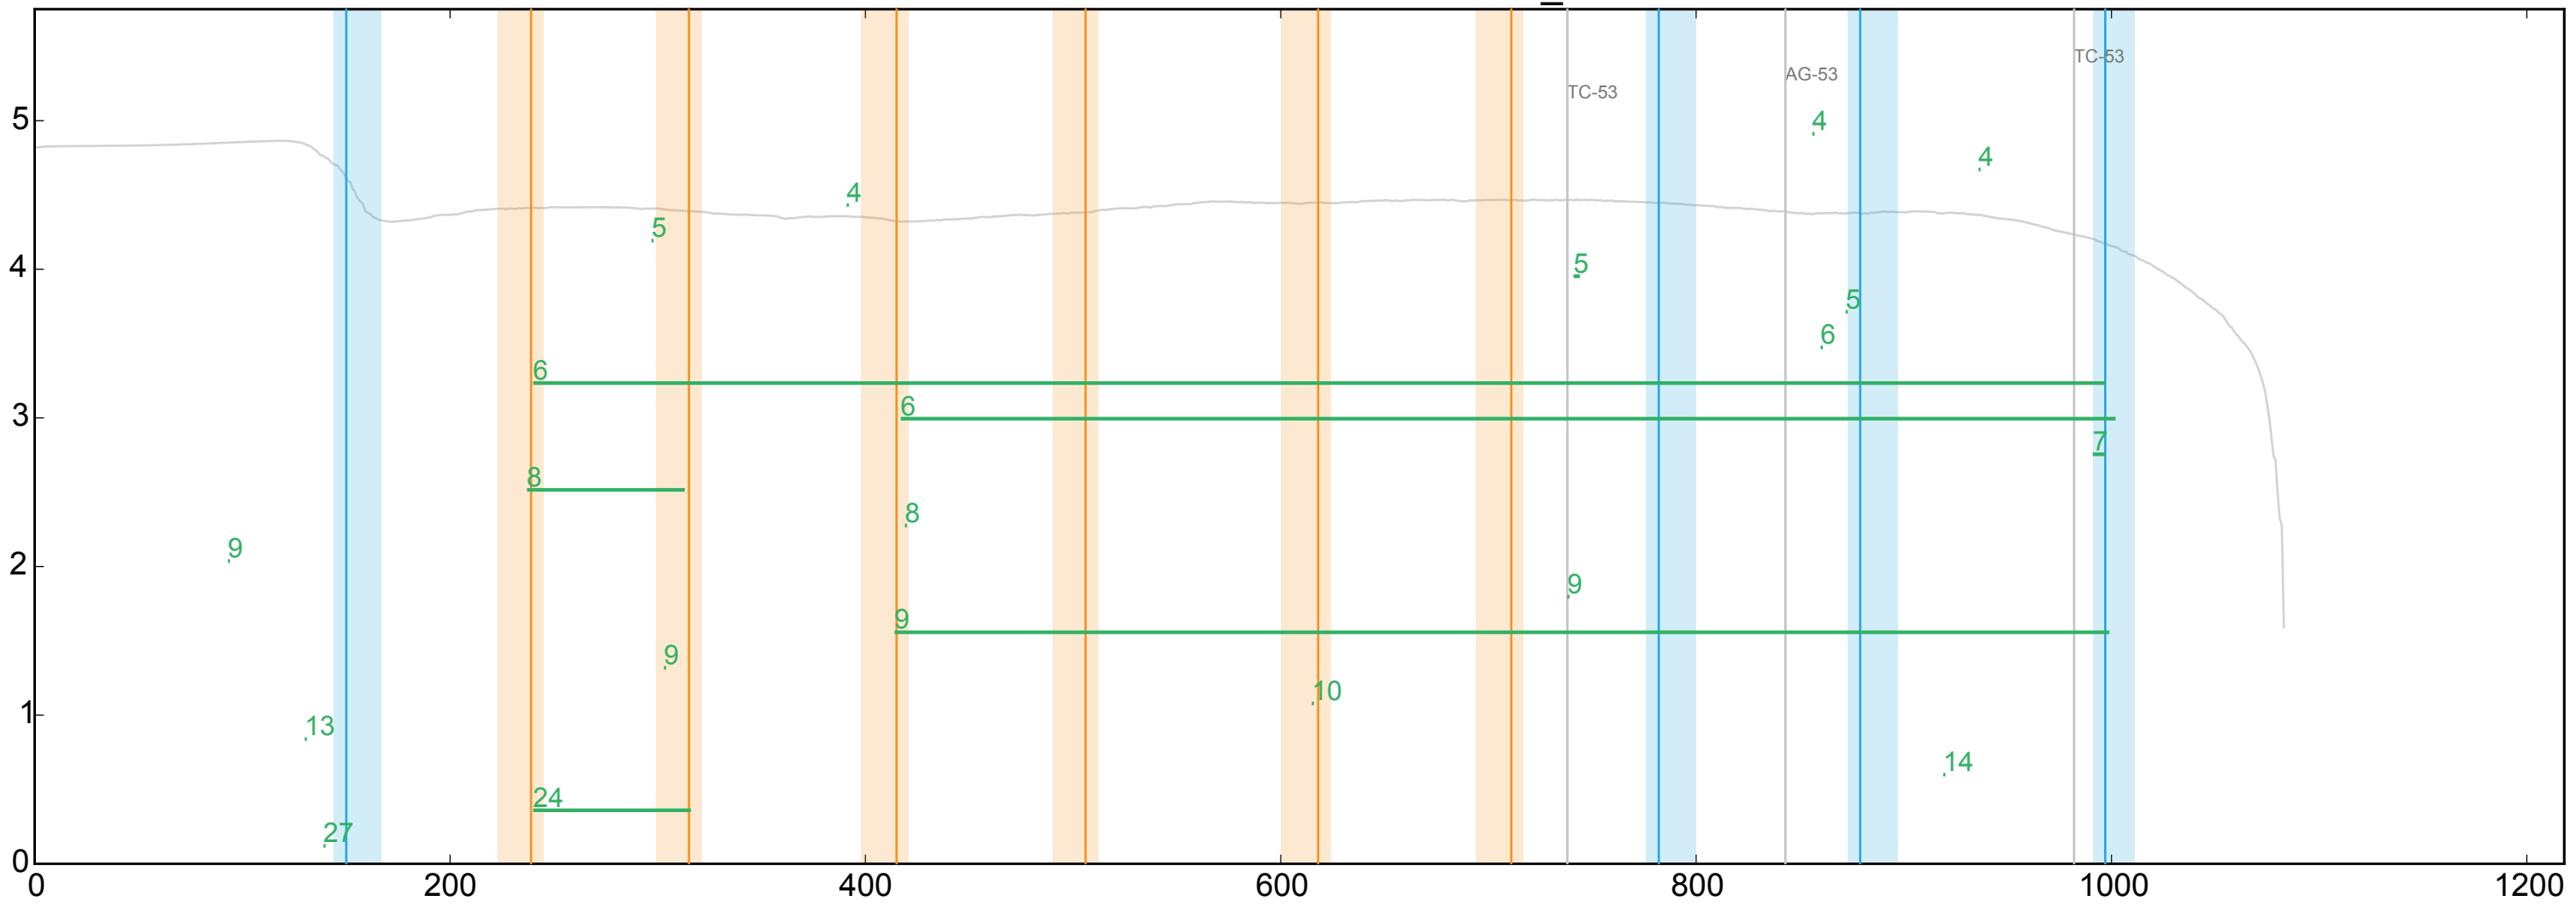

Mutant ENSDARG00000010770\_1

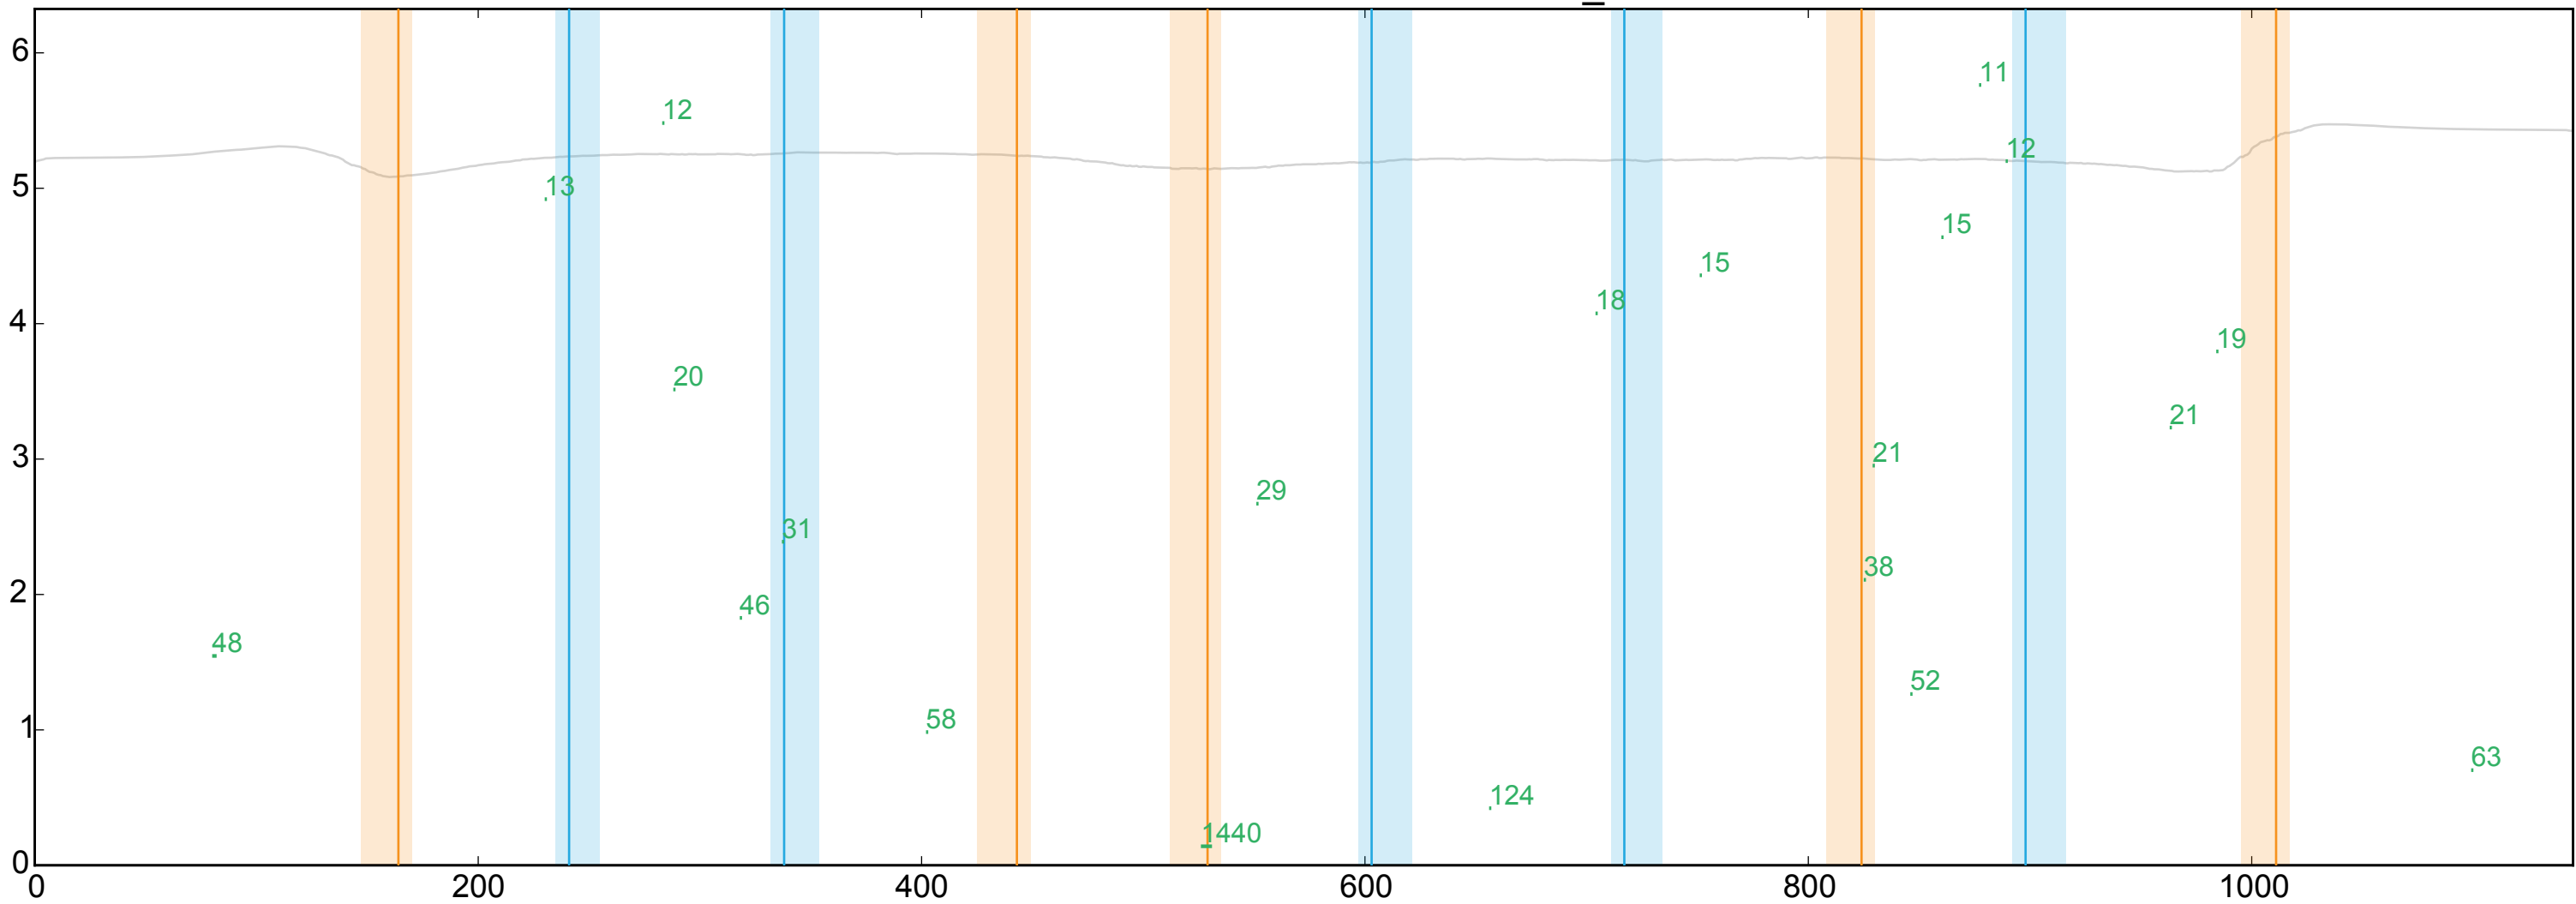

WT ENSDARG00000010770\_1

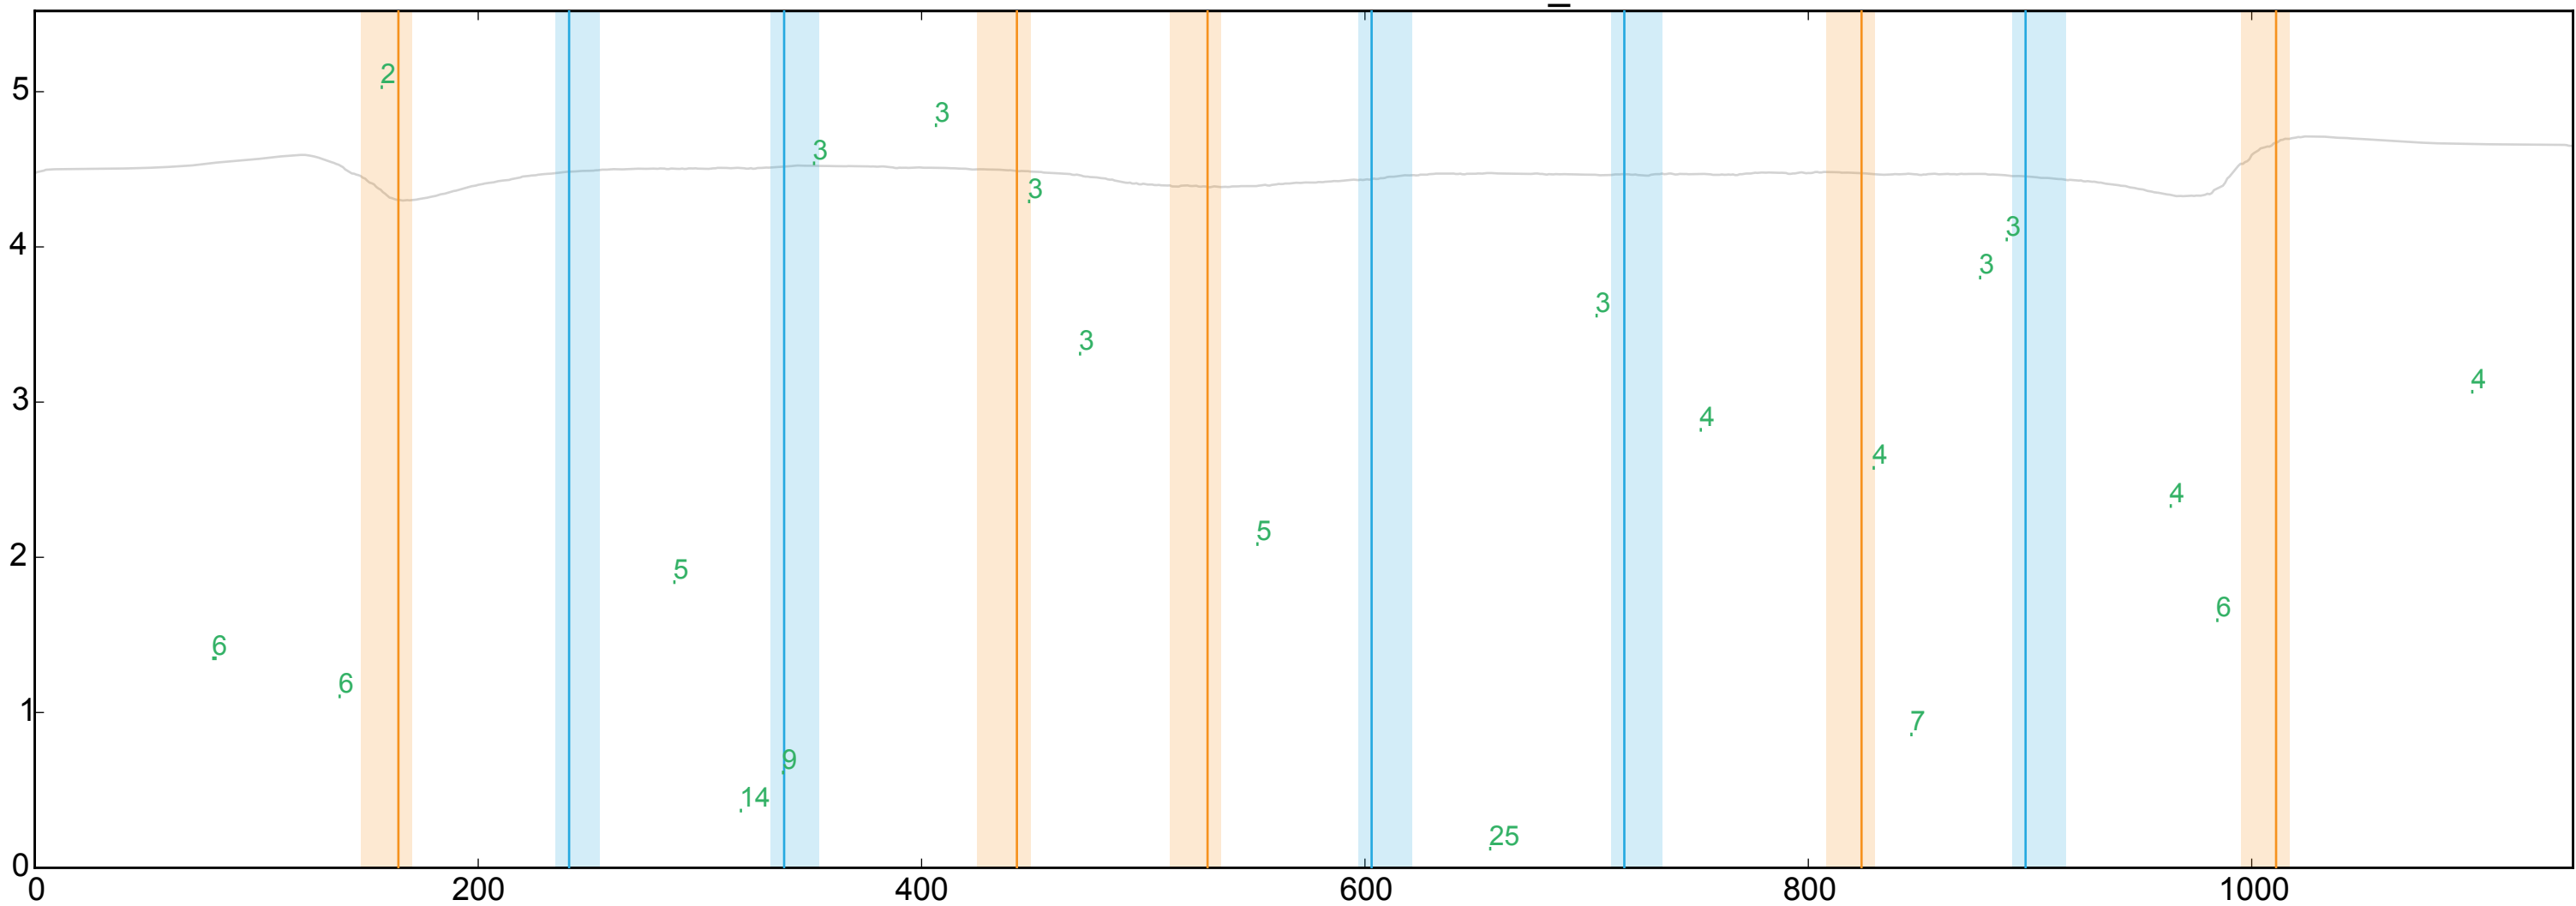

Mutant ENSDARG00000075281\_0

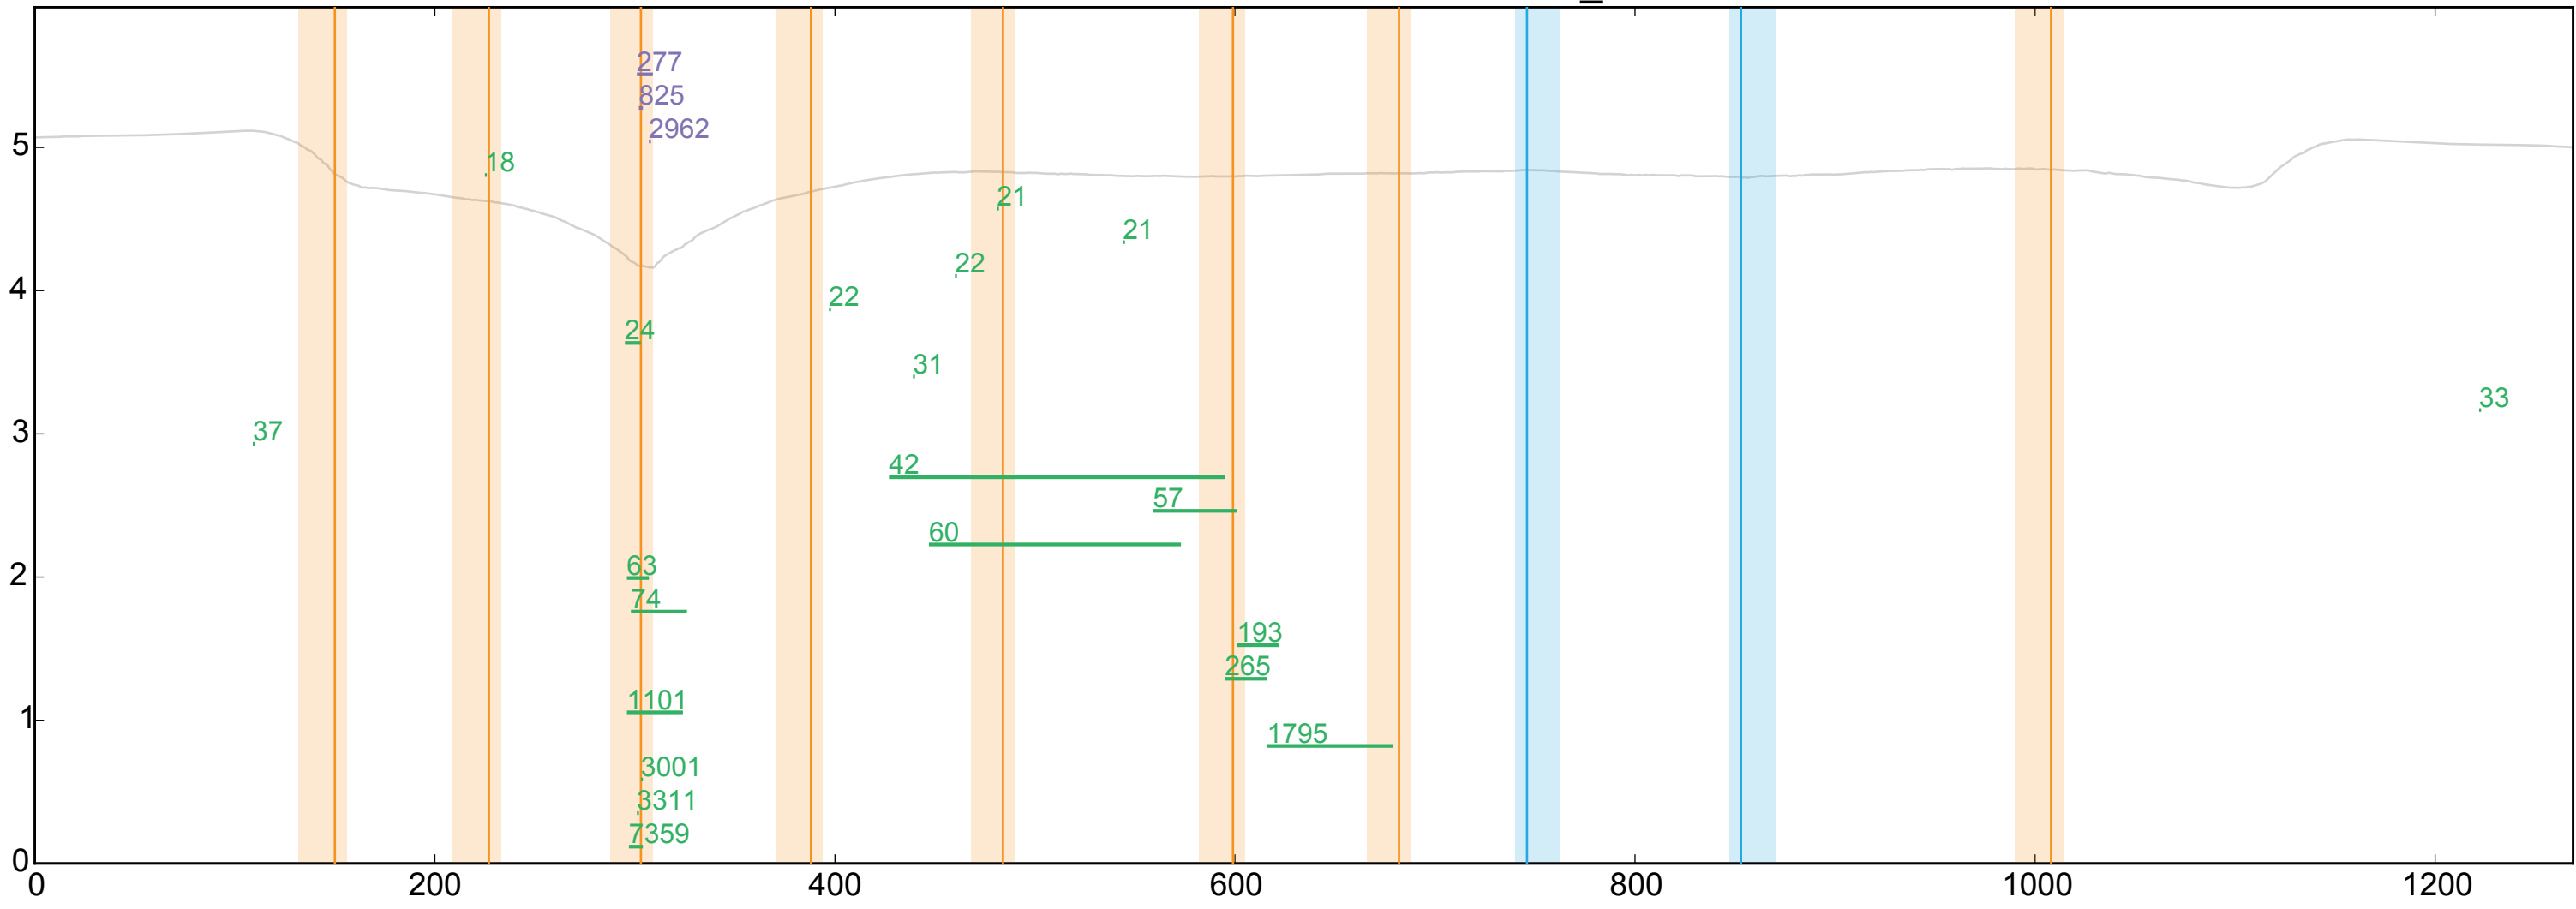

WT ENSDARG00000075281\_0

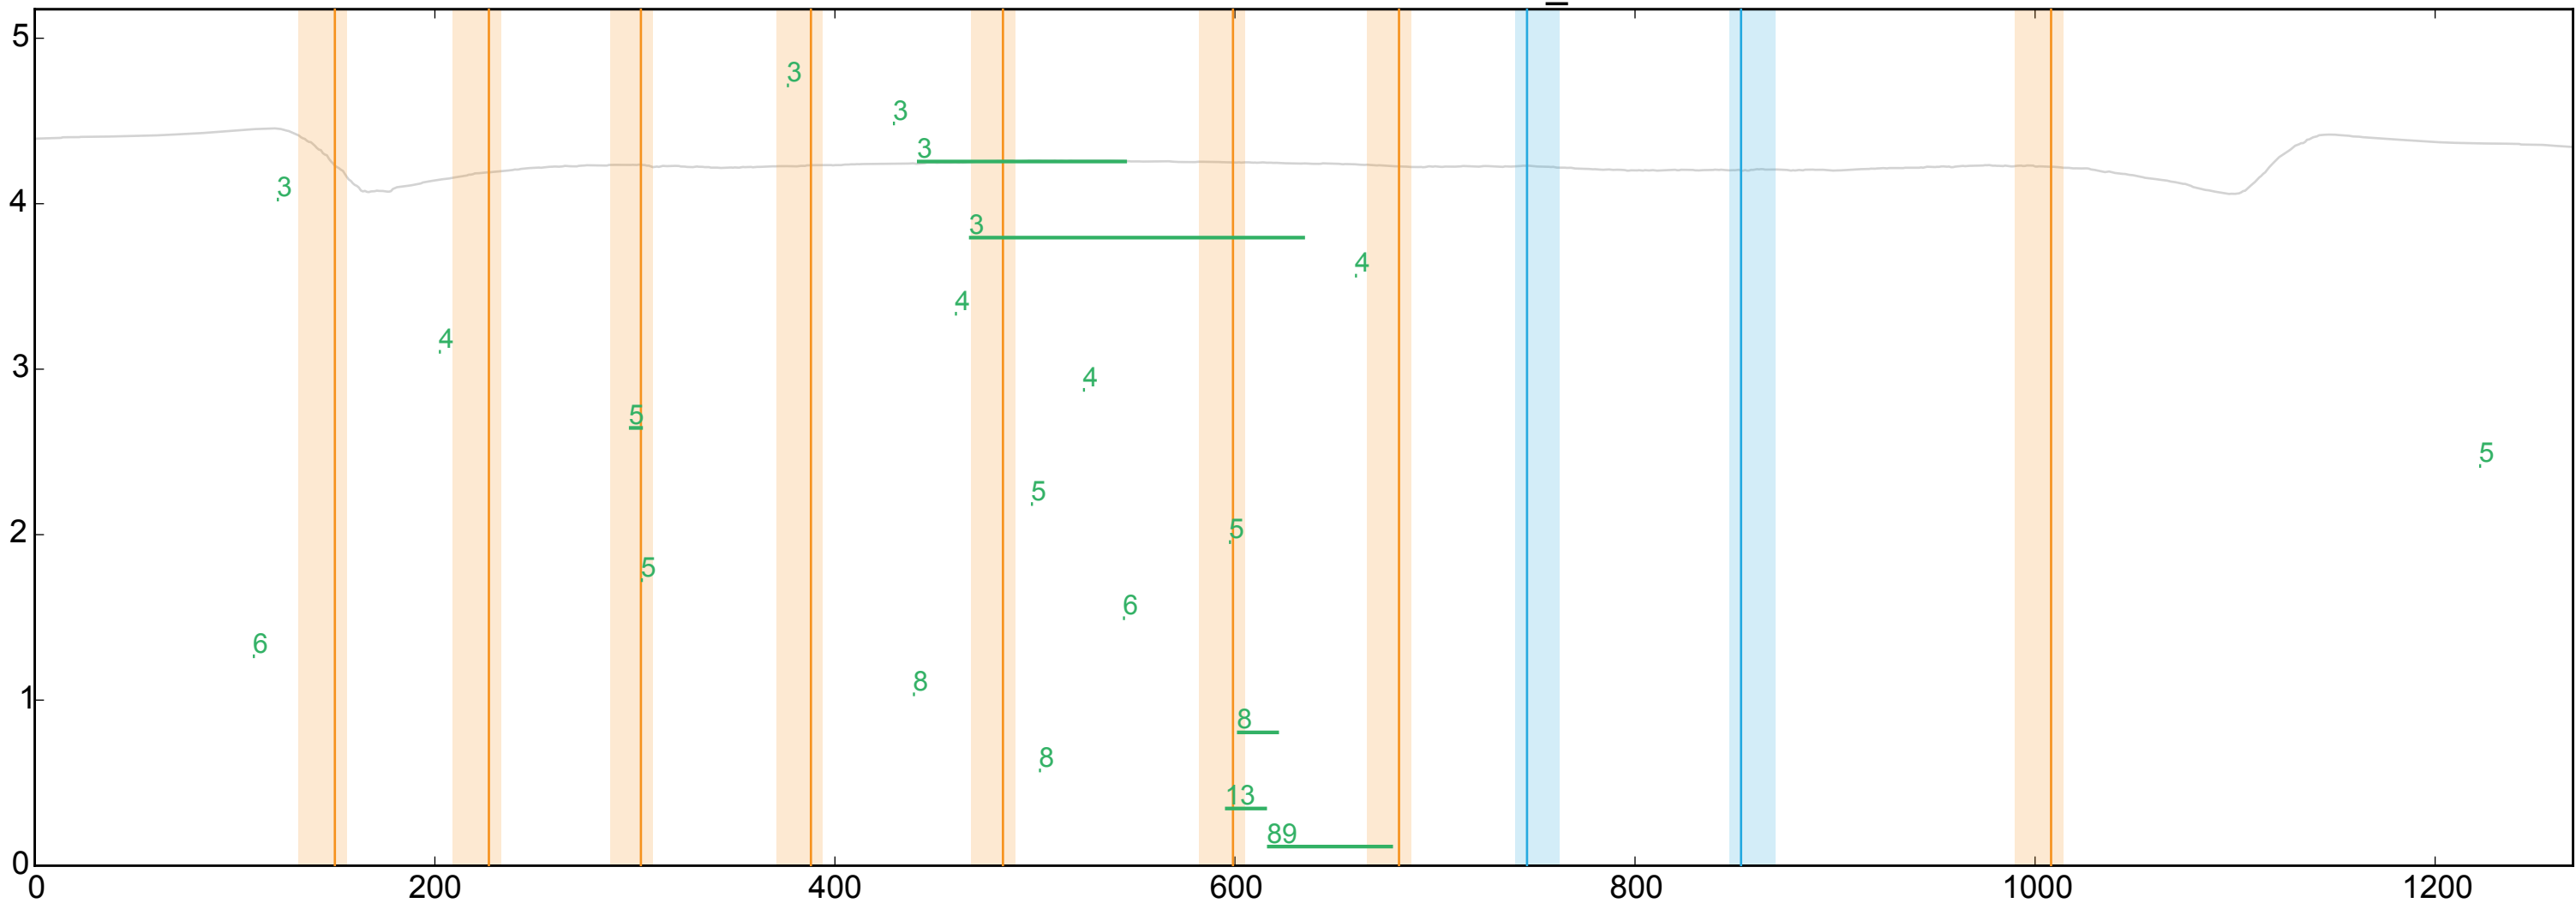

Mutant ENSDARG00000043246\_3

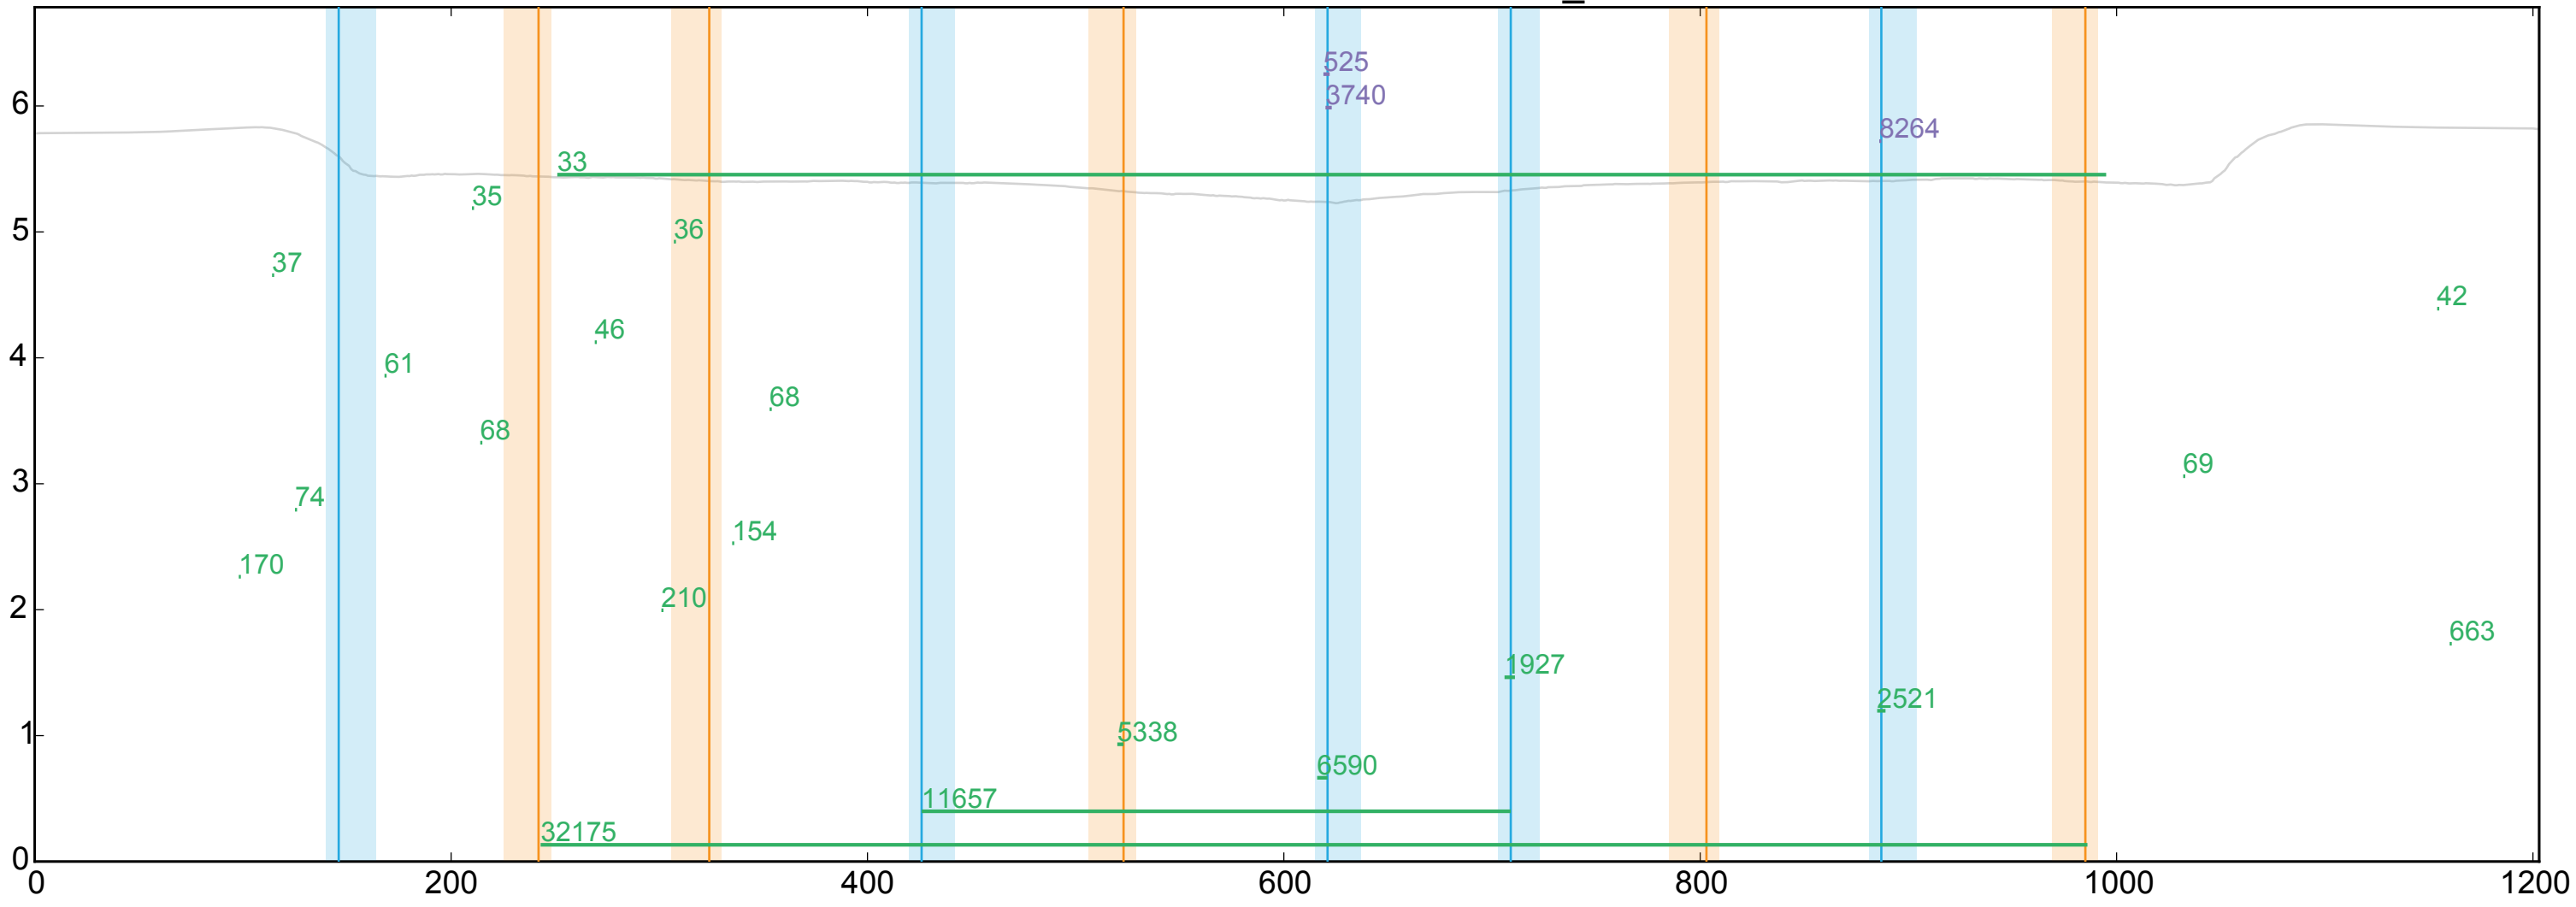

WT ENSDARG00000043246\_3

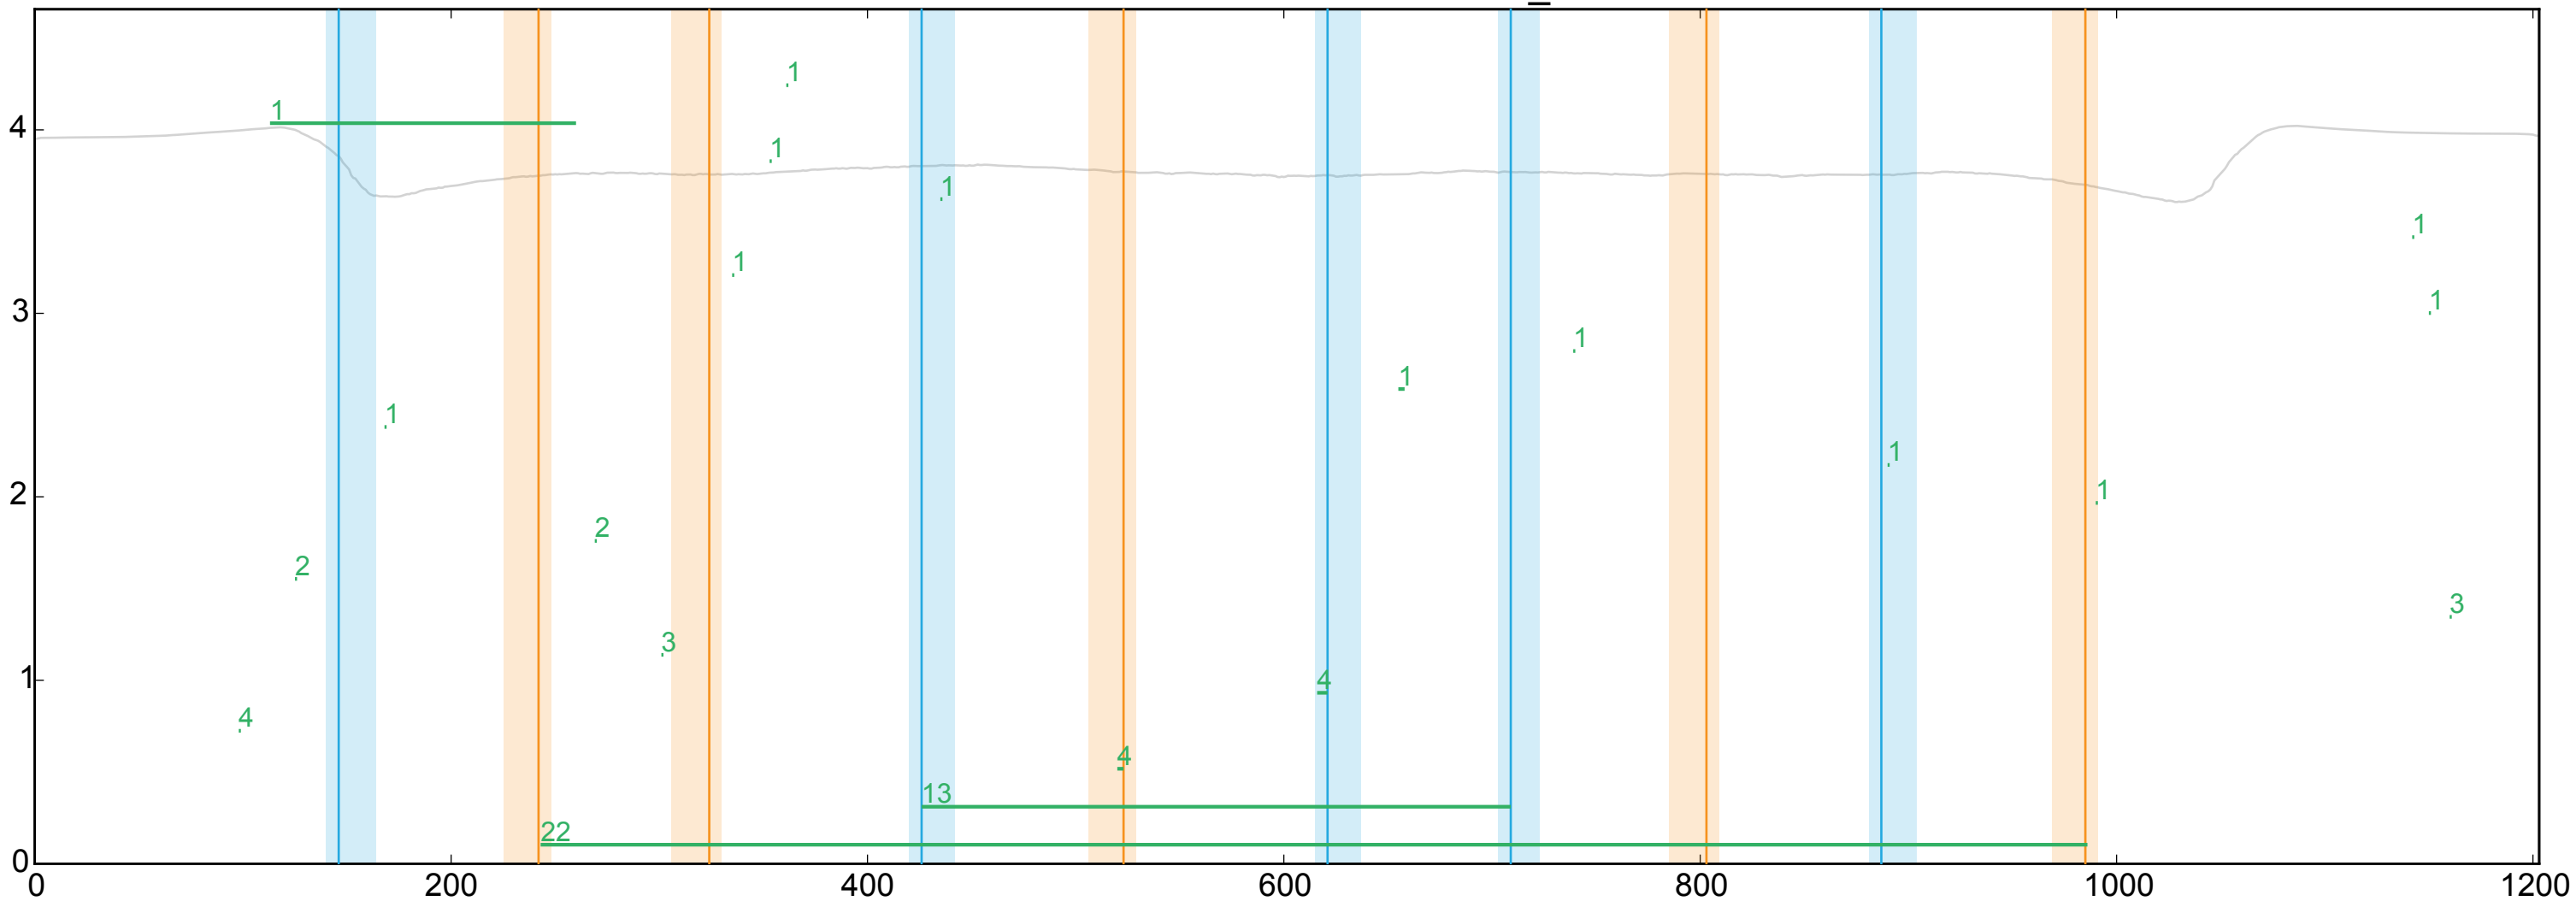

Mutant ENSDARG00000038458\_3

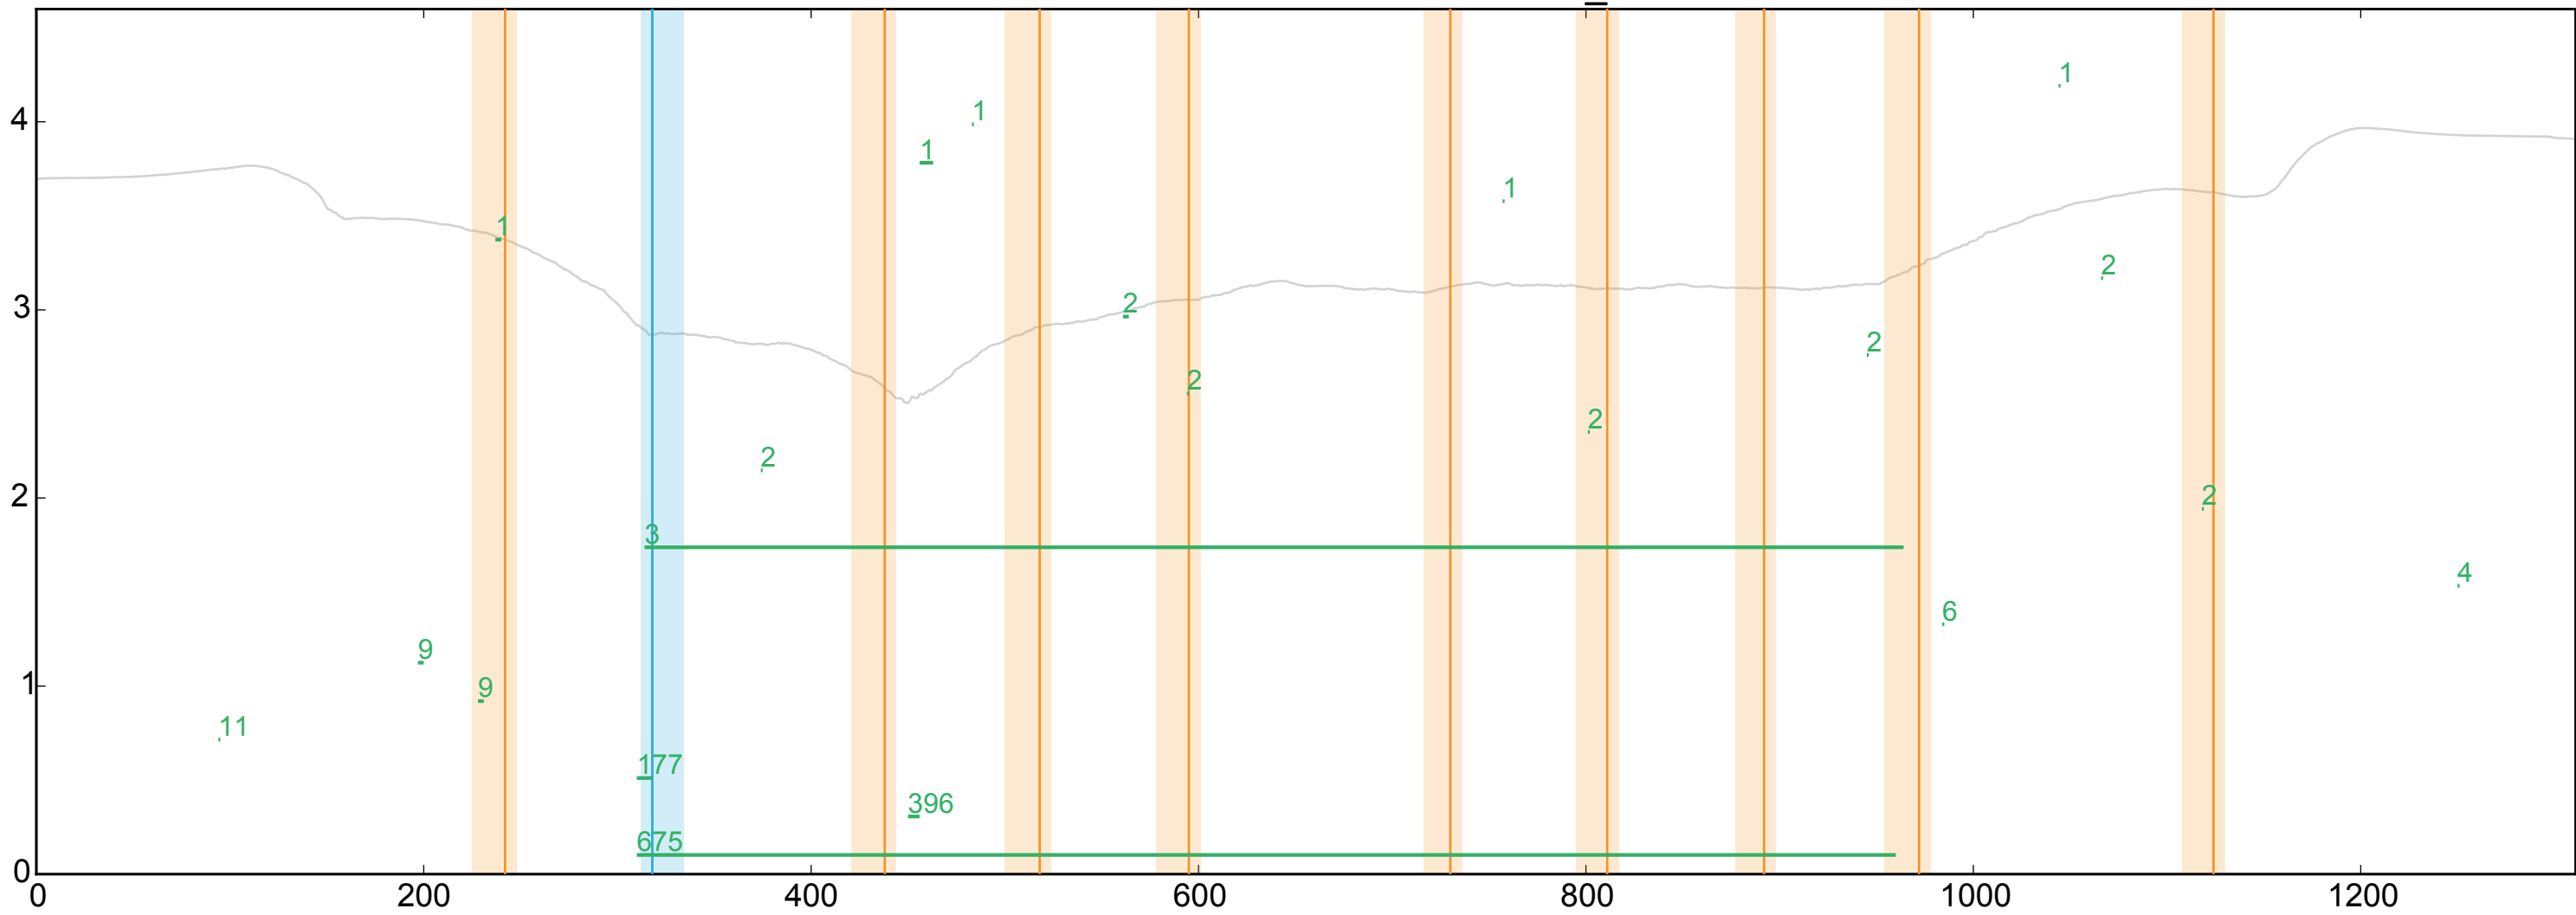

WT ENSDARG00000038458\_3

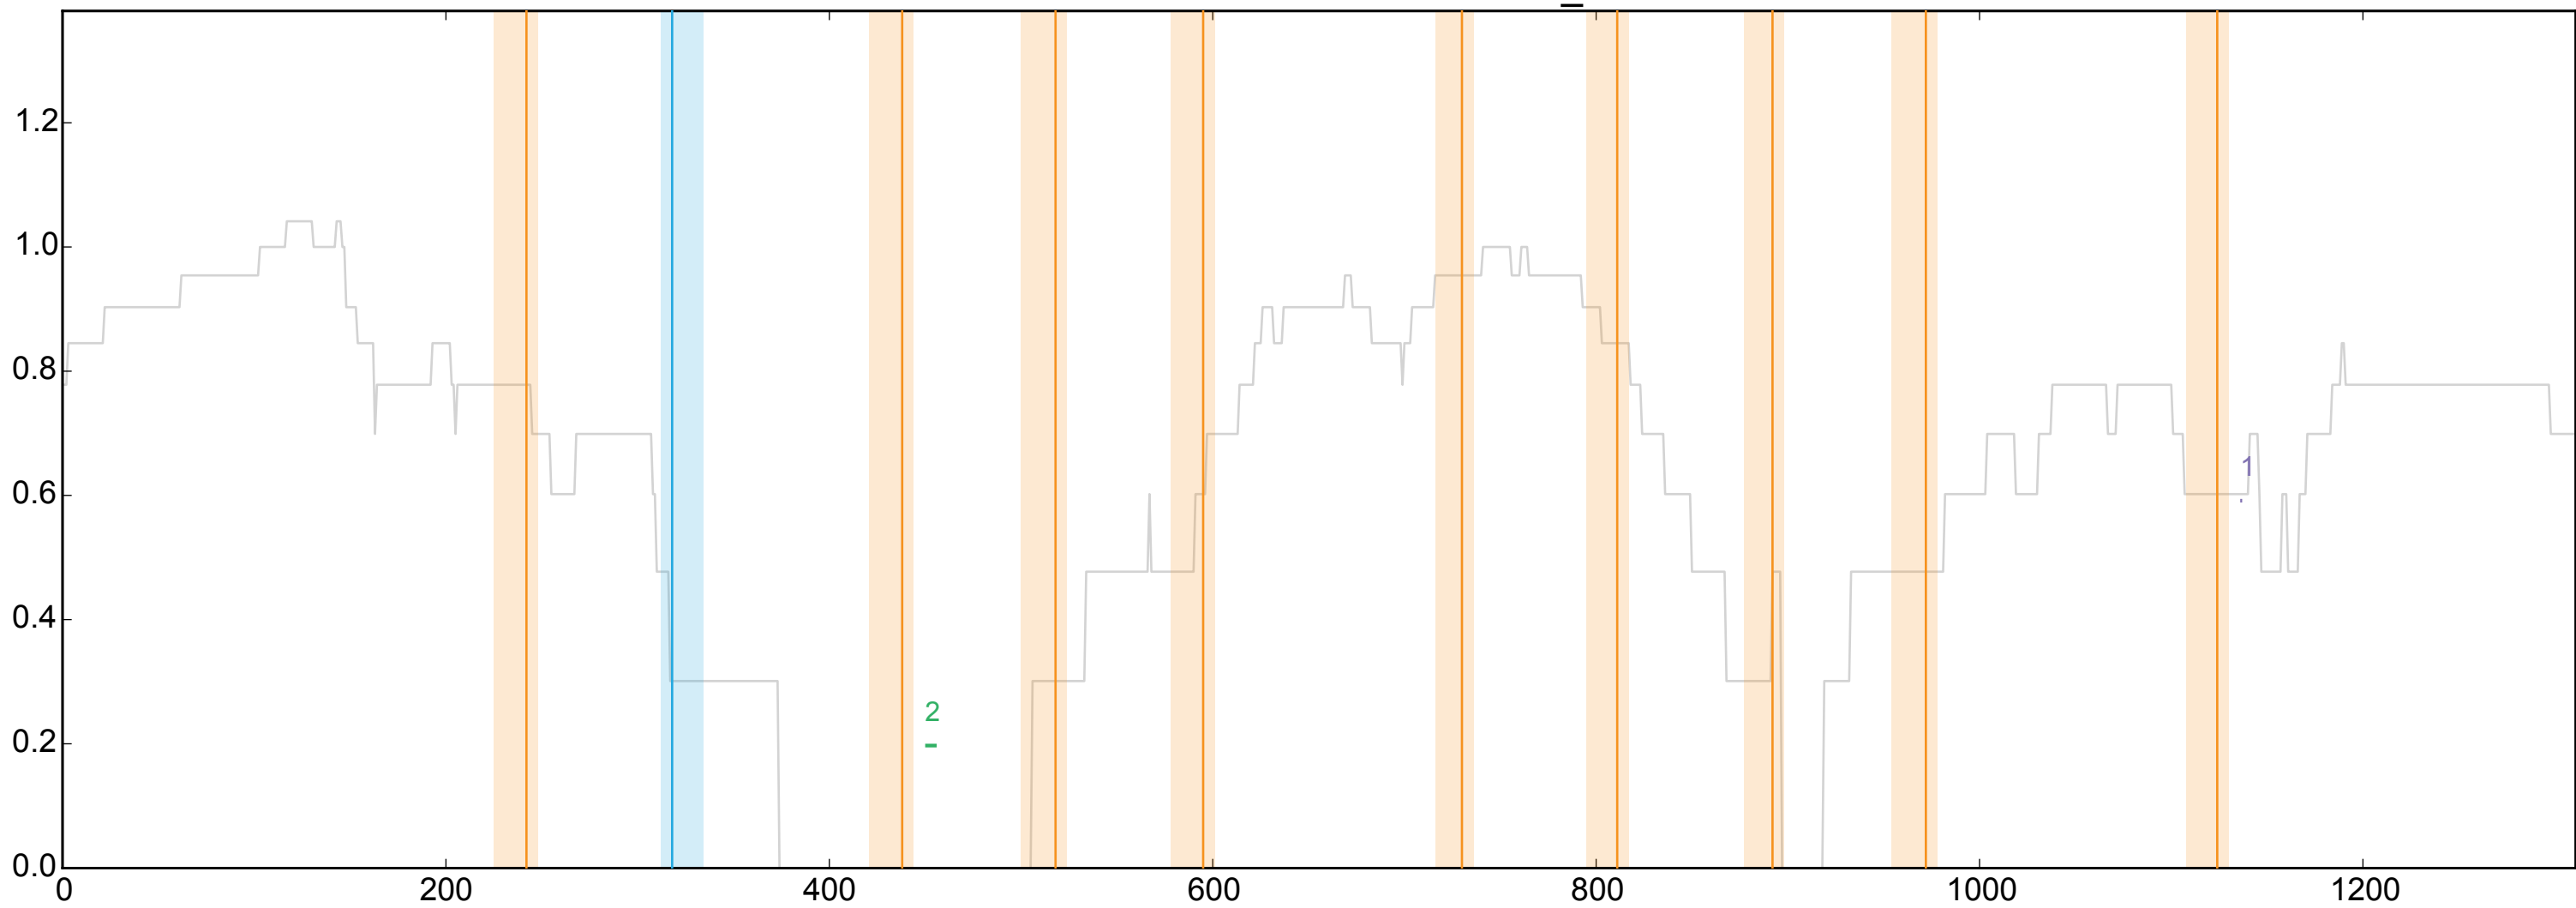

Mutant ENSDARG00000059961\_3

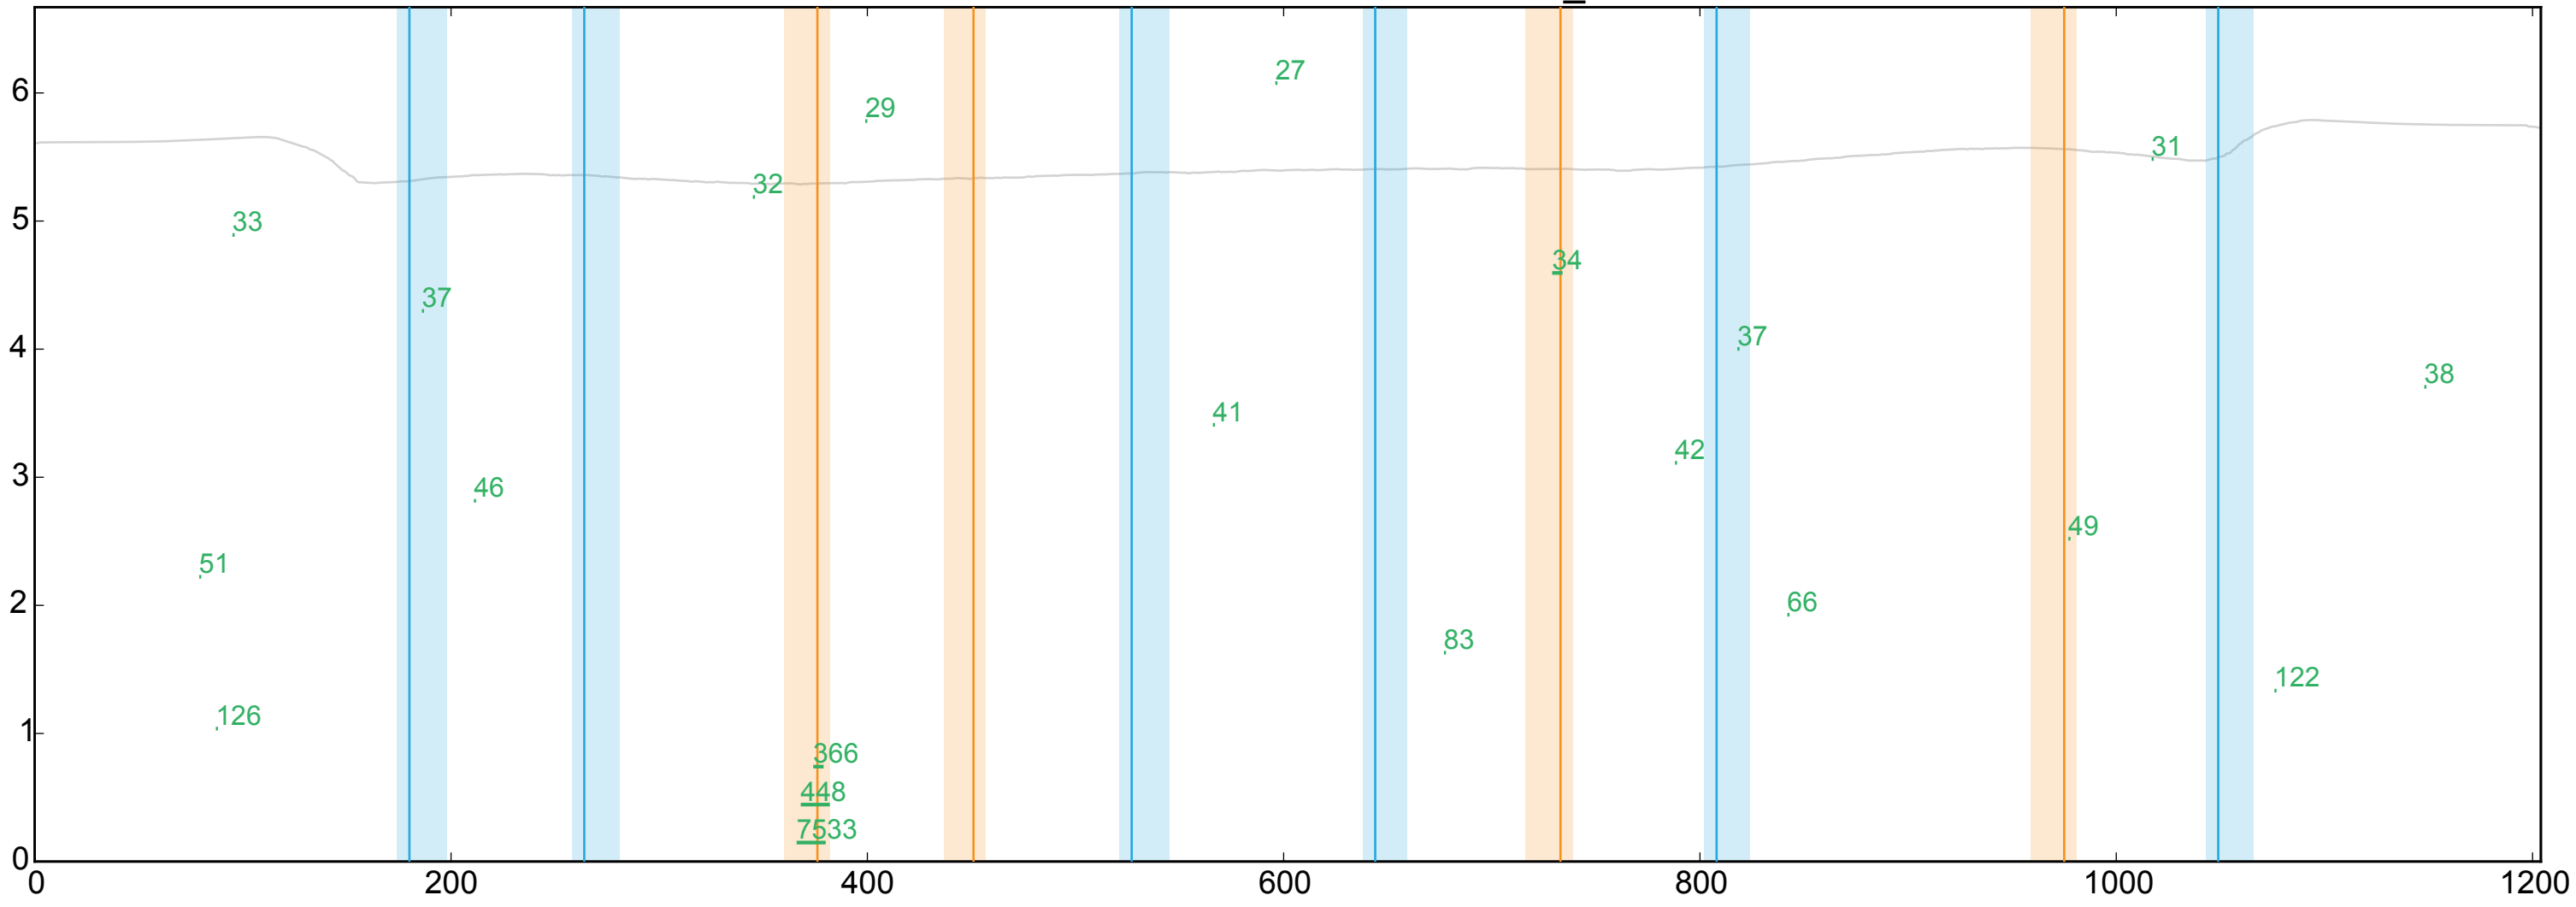

WT ENSDARG00000059961\_3

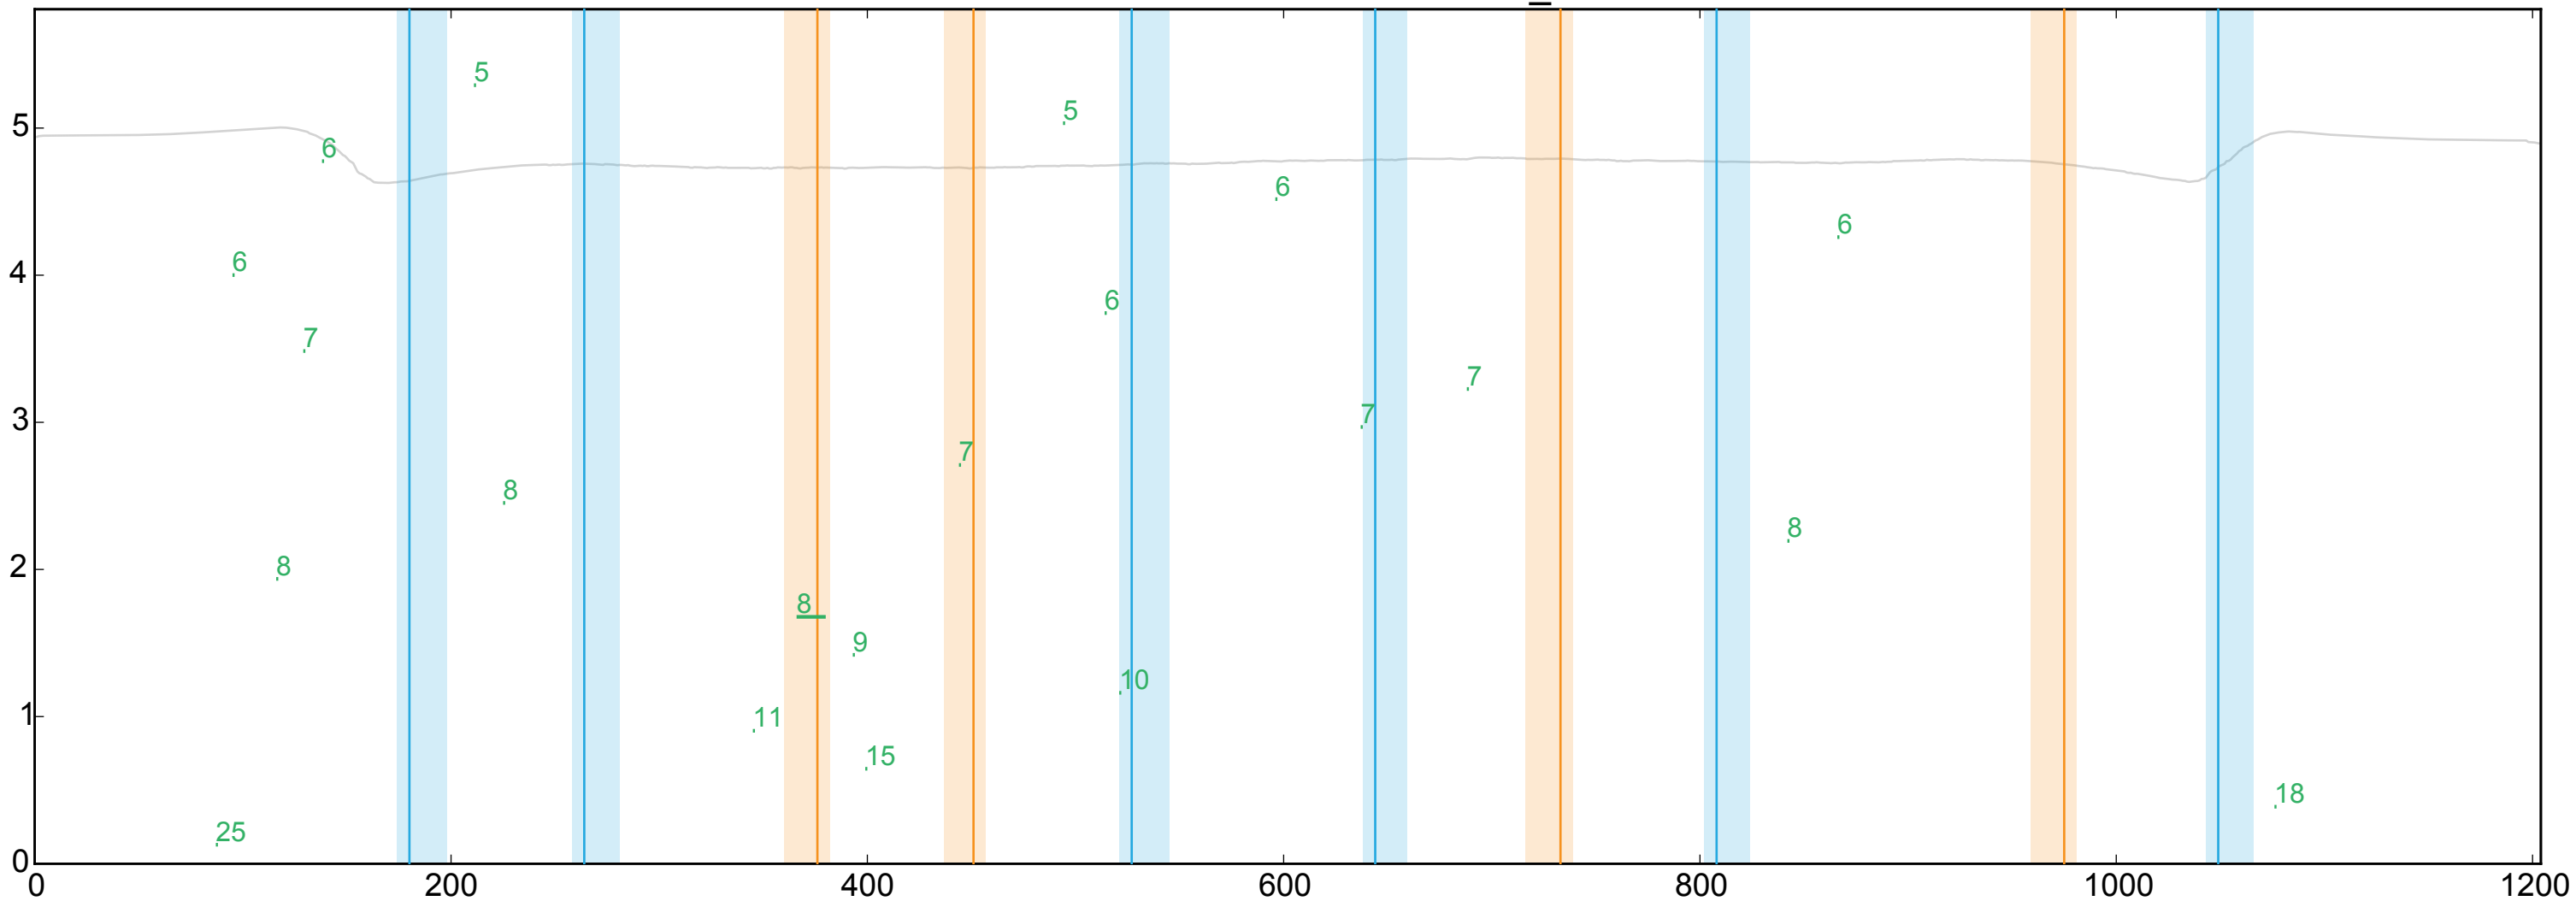



Mutant ENSDARG00000016532\_6

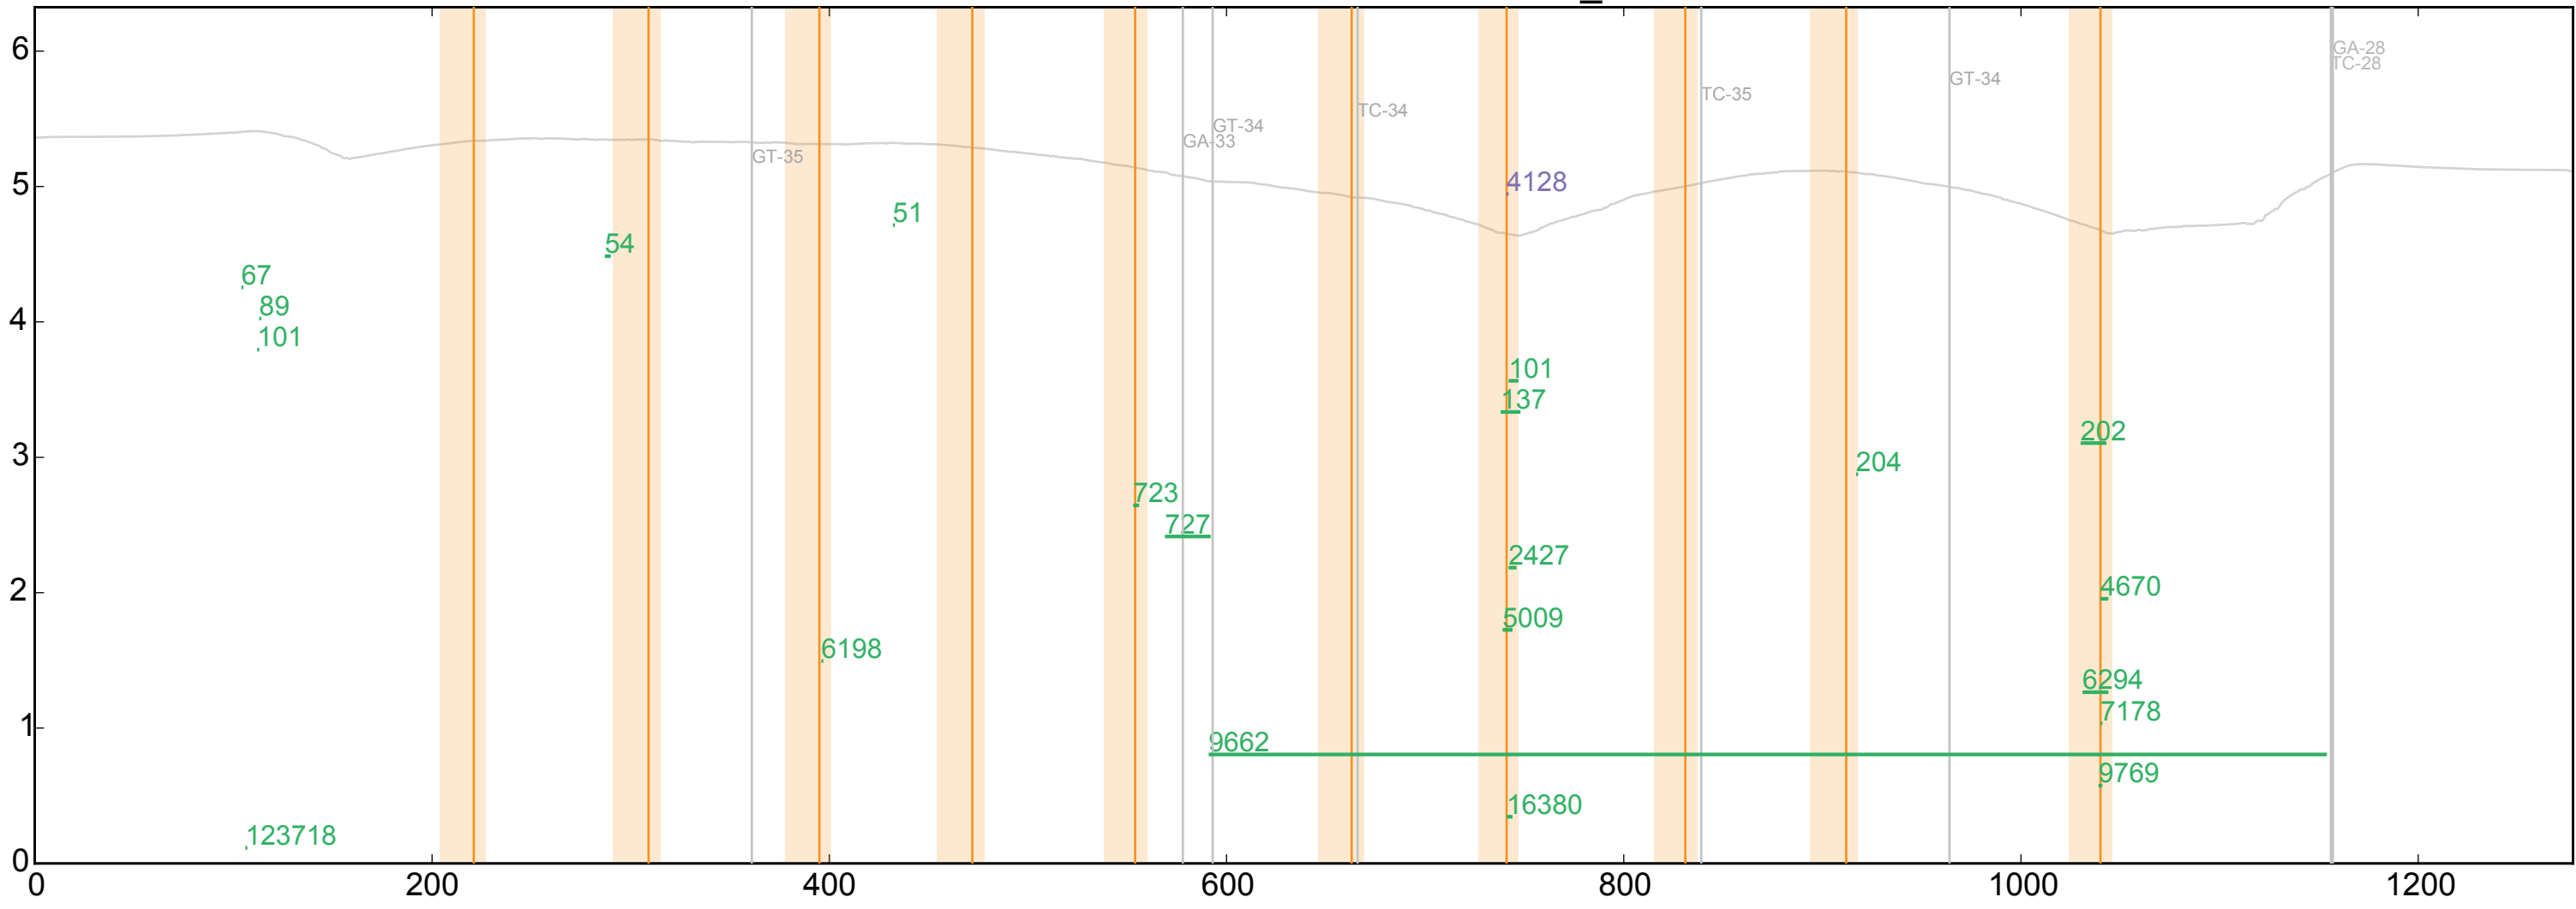

WT ENSDARG00000016532\_6

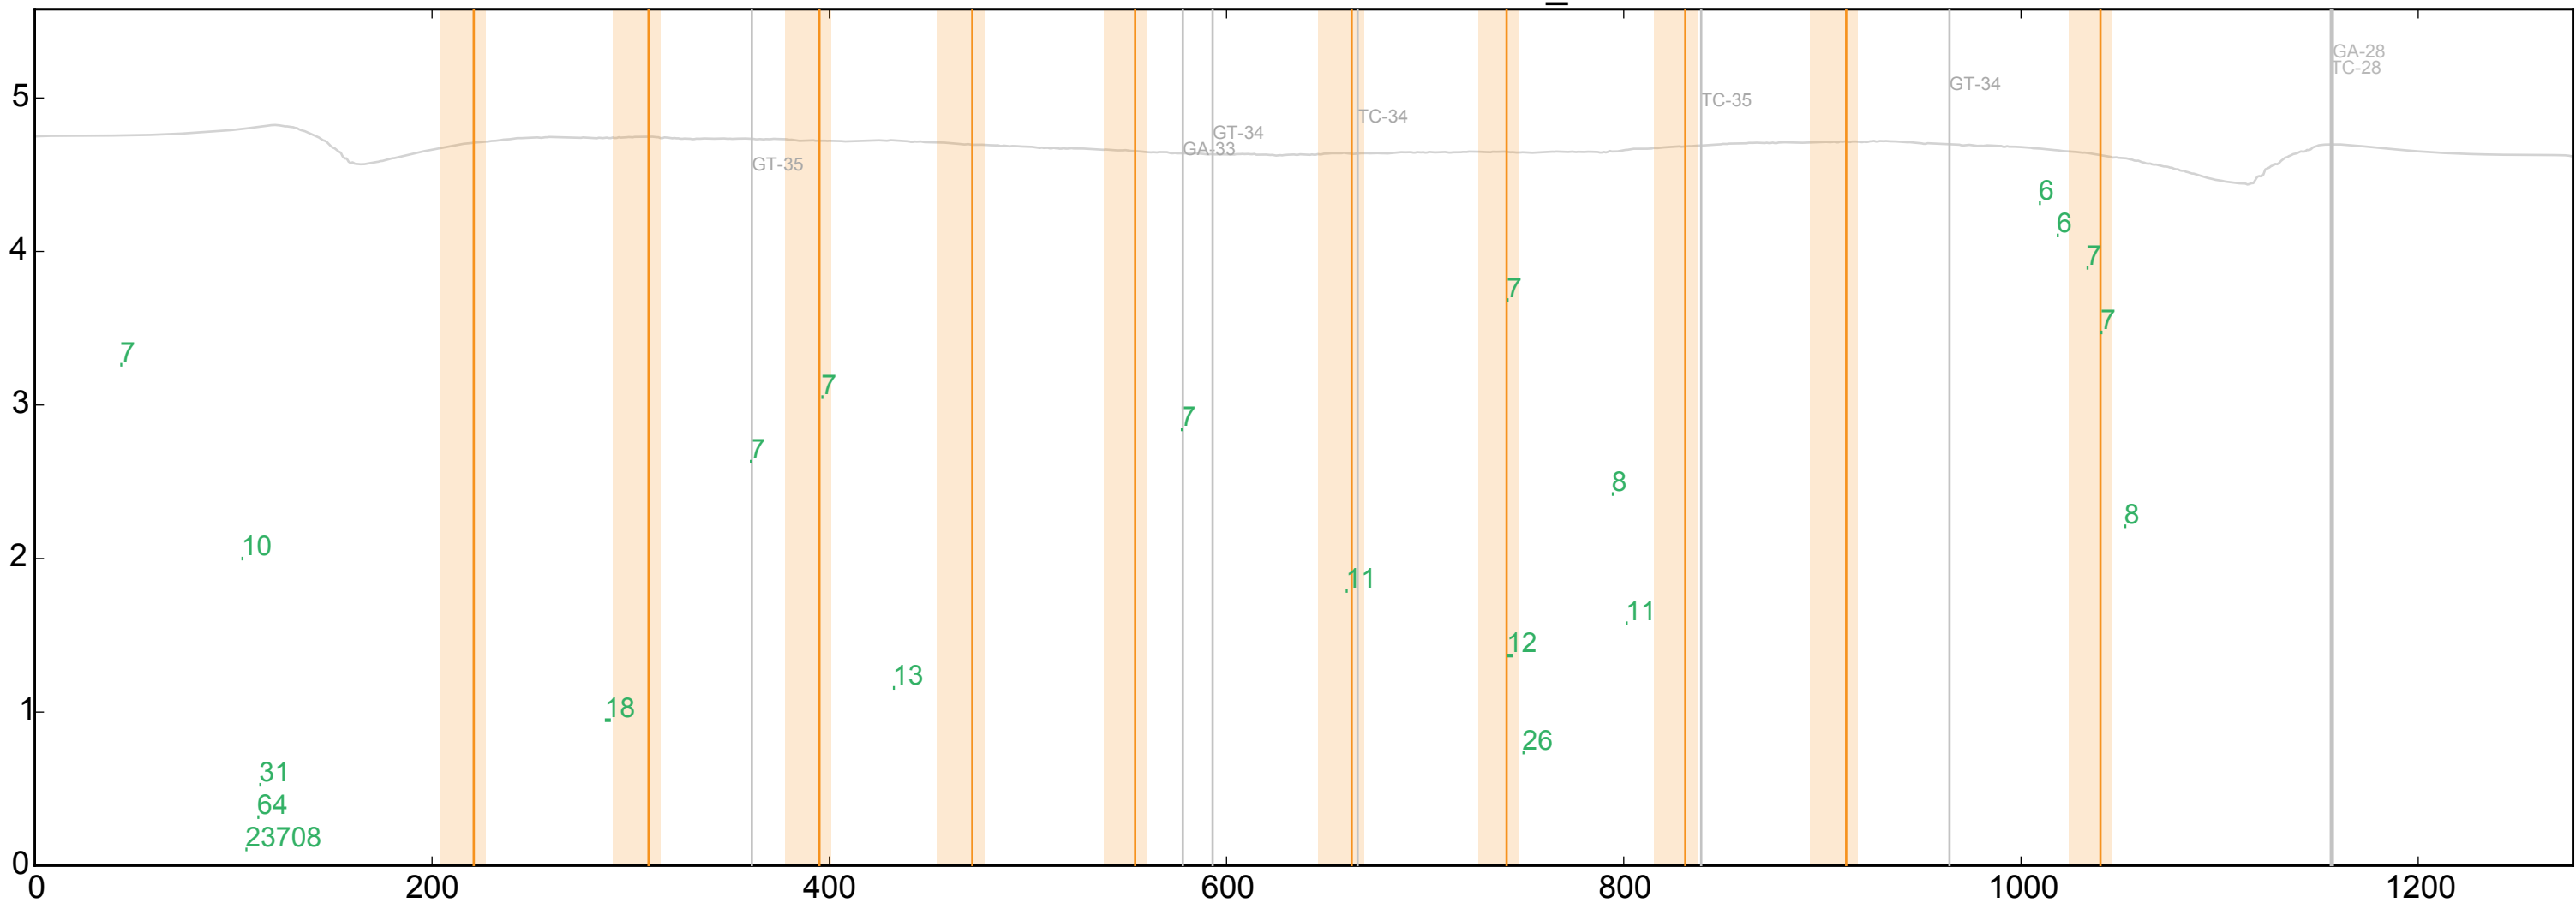

Mutant ENSDARG00000033845\_4

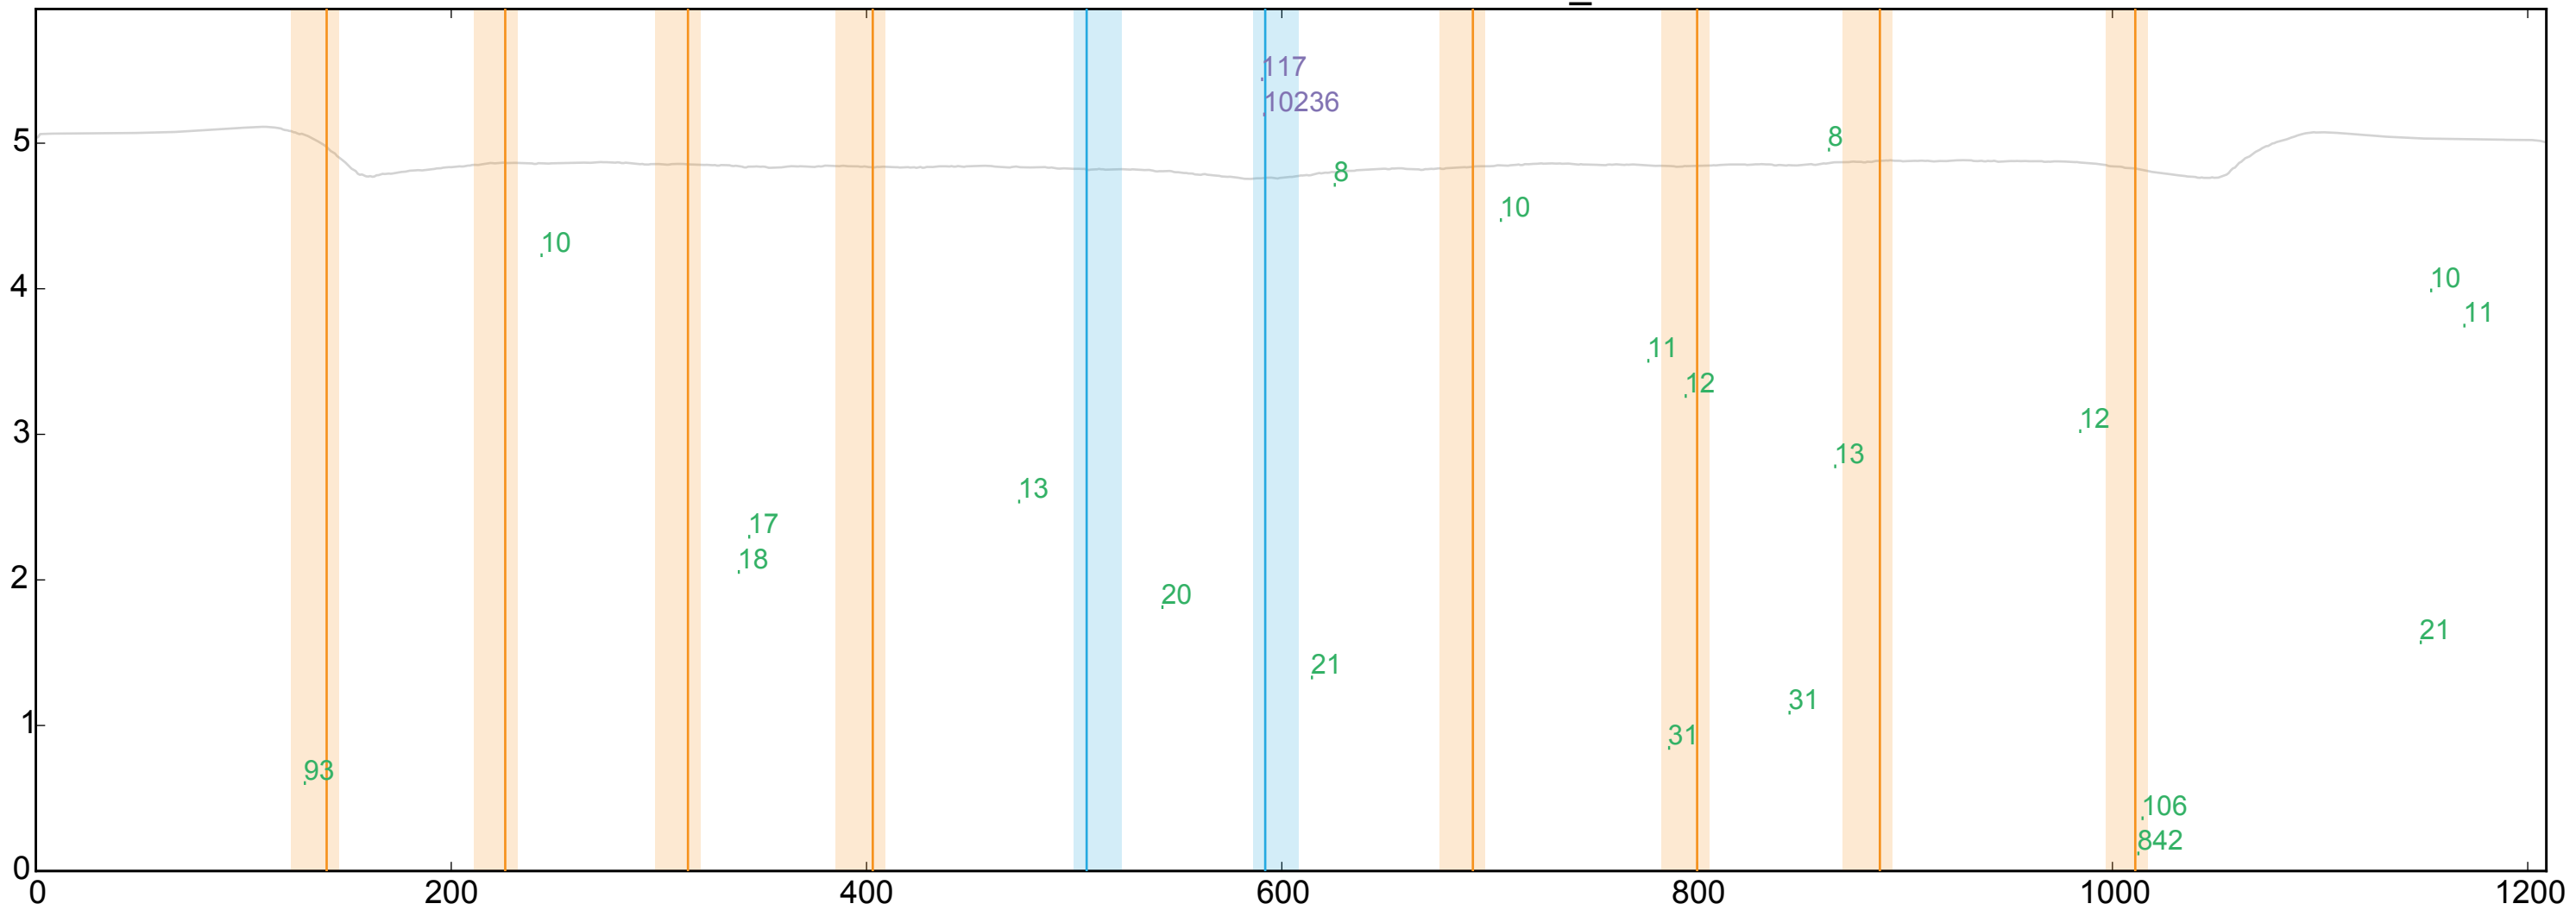

WT ENSDARG00000033845\_4

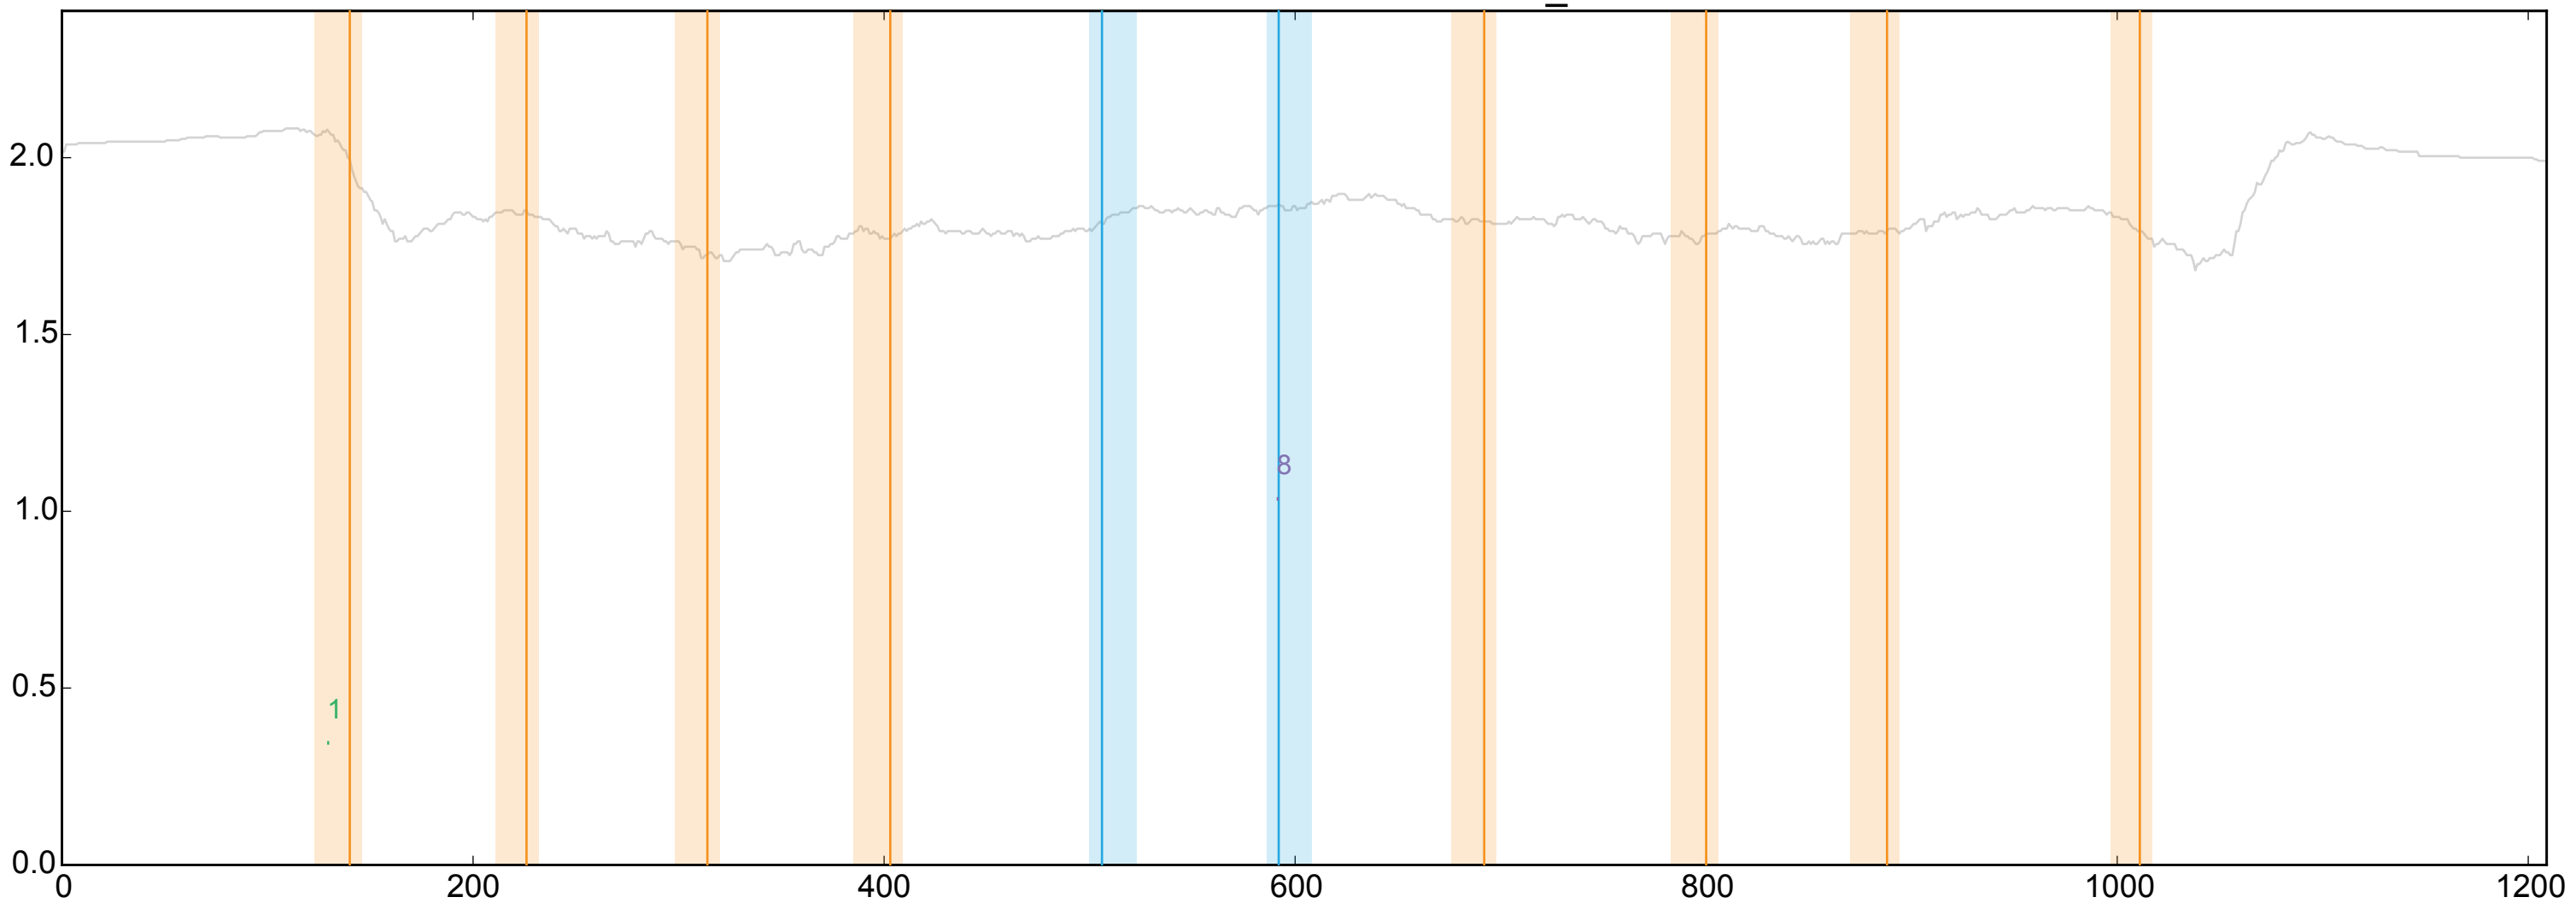

Mutant ENSDARG00000070145\_20

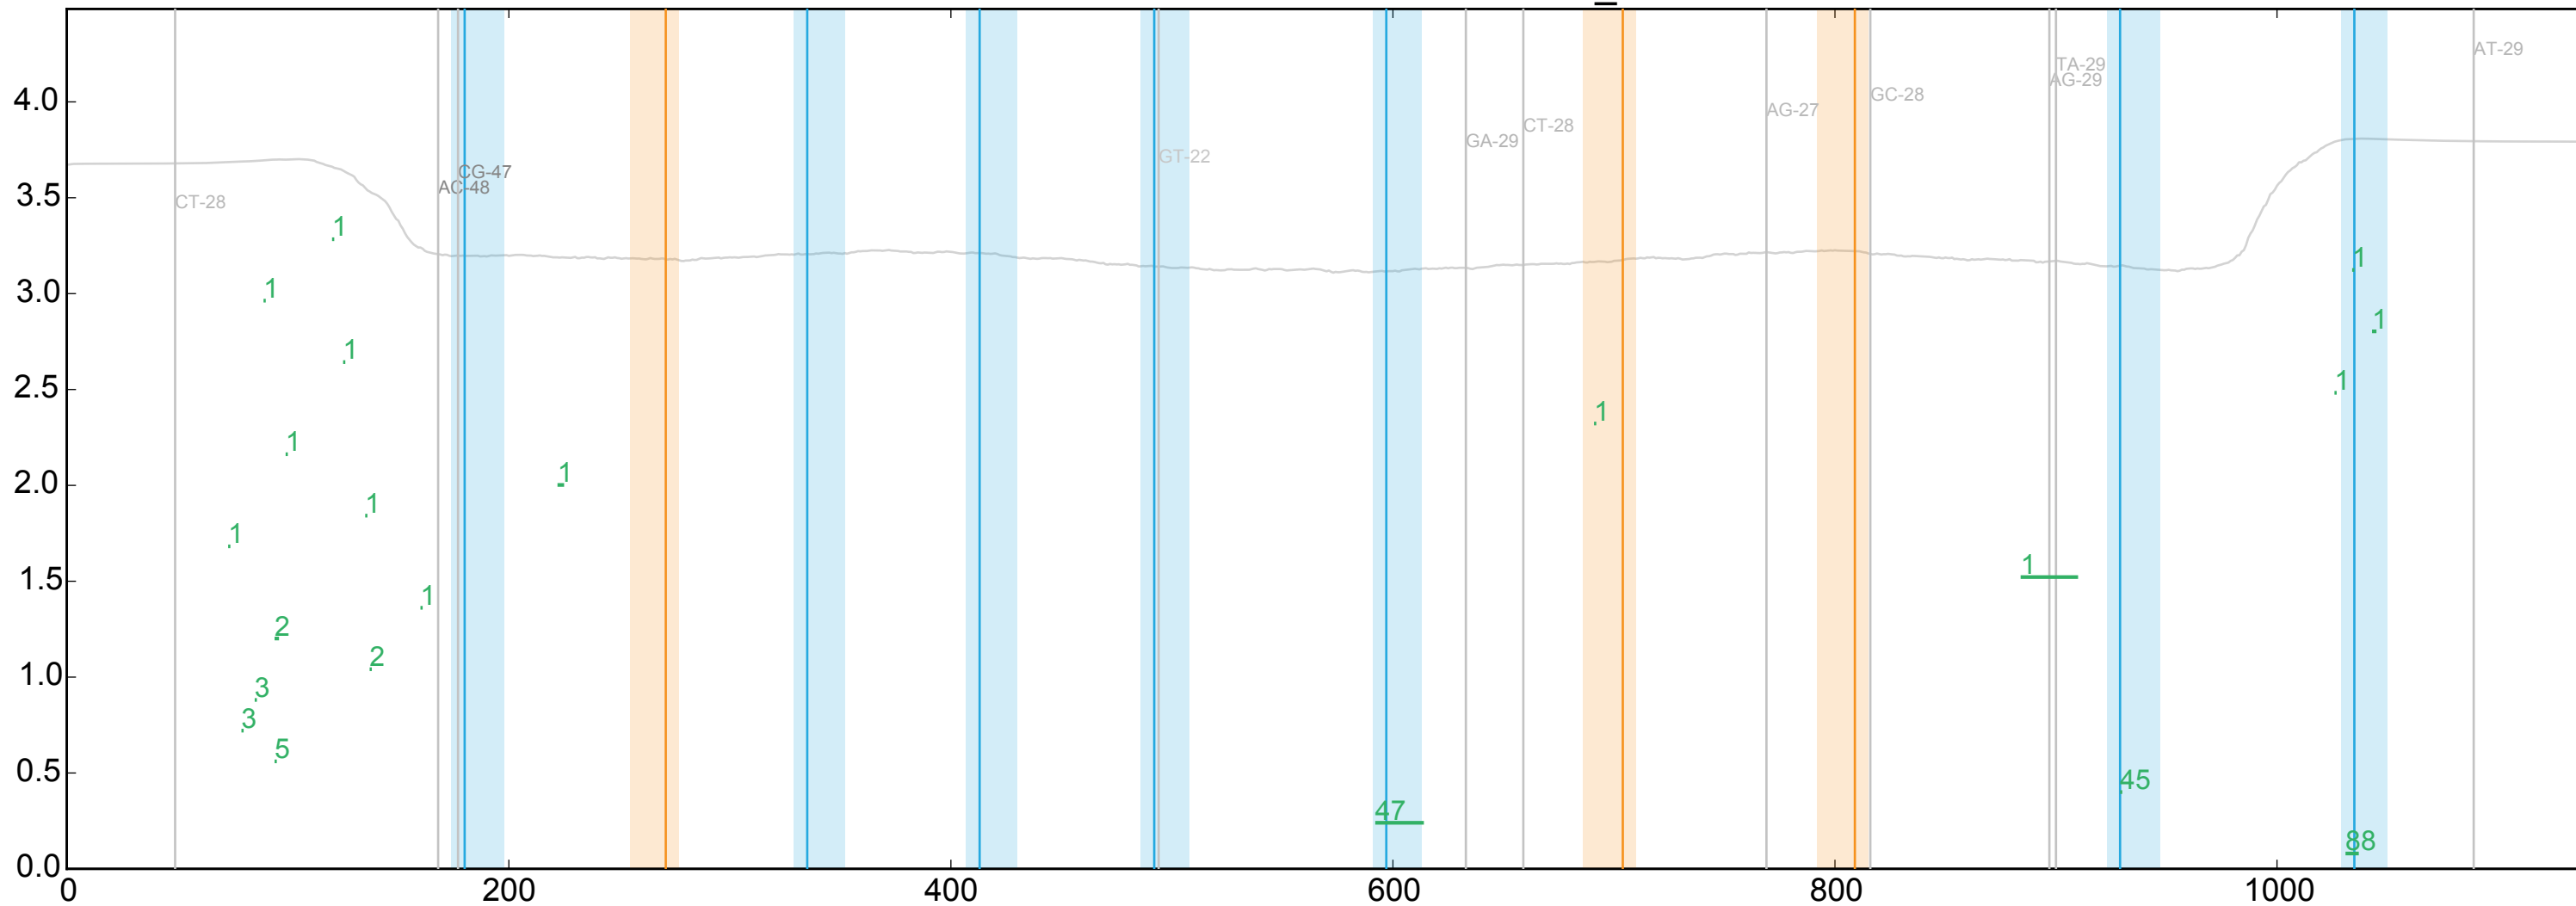

WT ENSDARG00000070145\_20

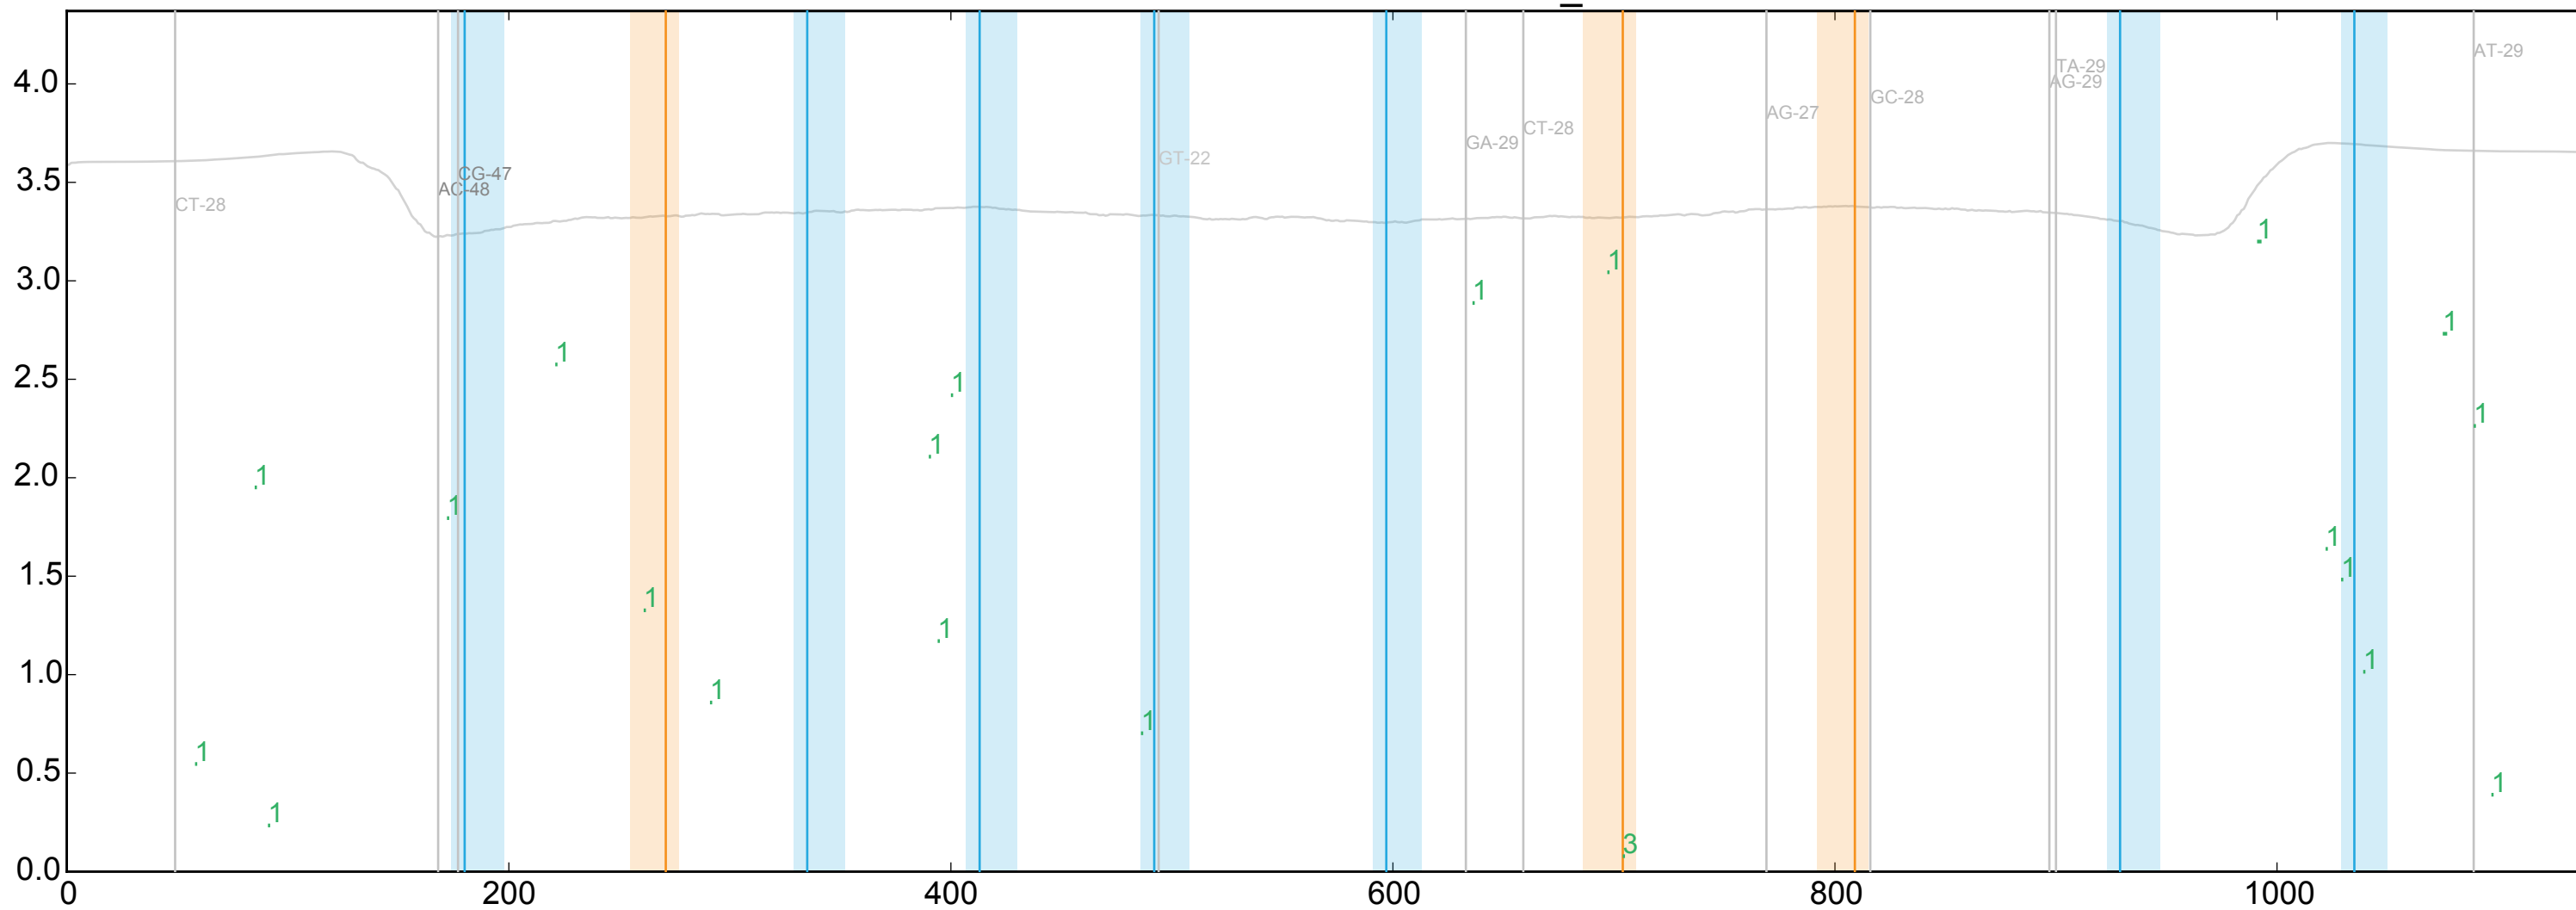

Mutant ENSDARG00000029045\_5

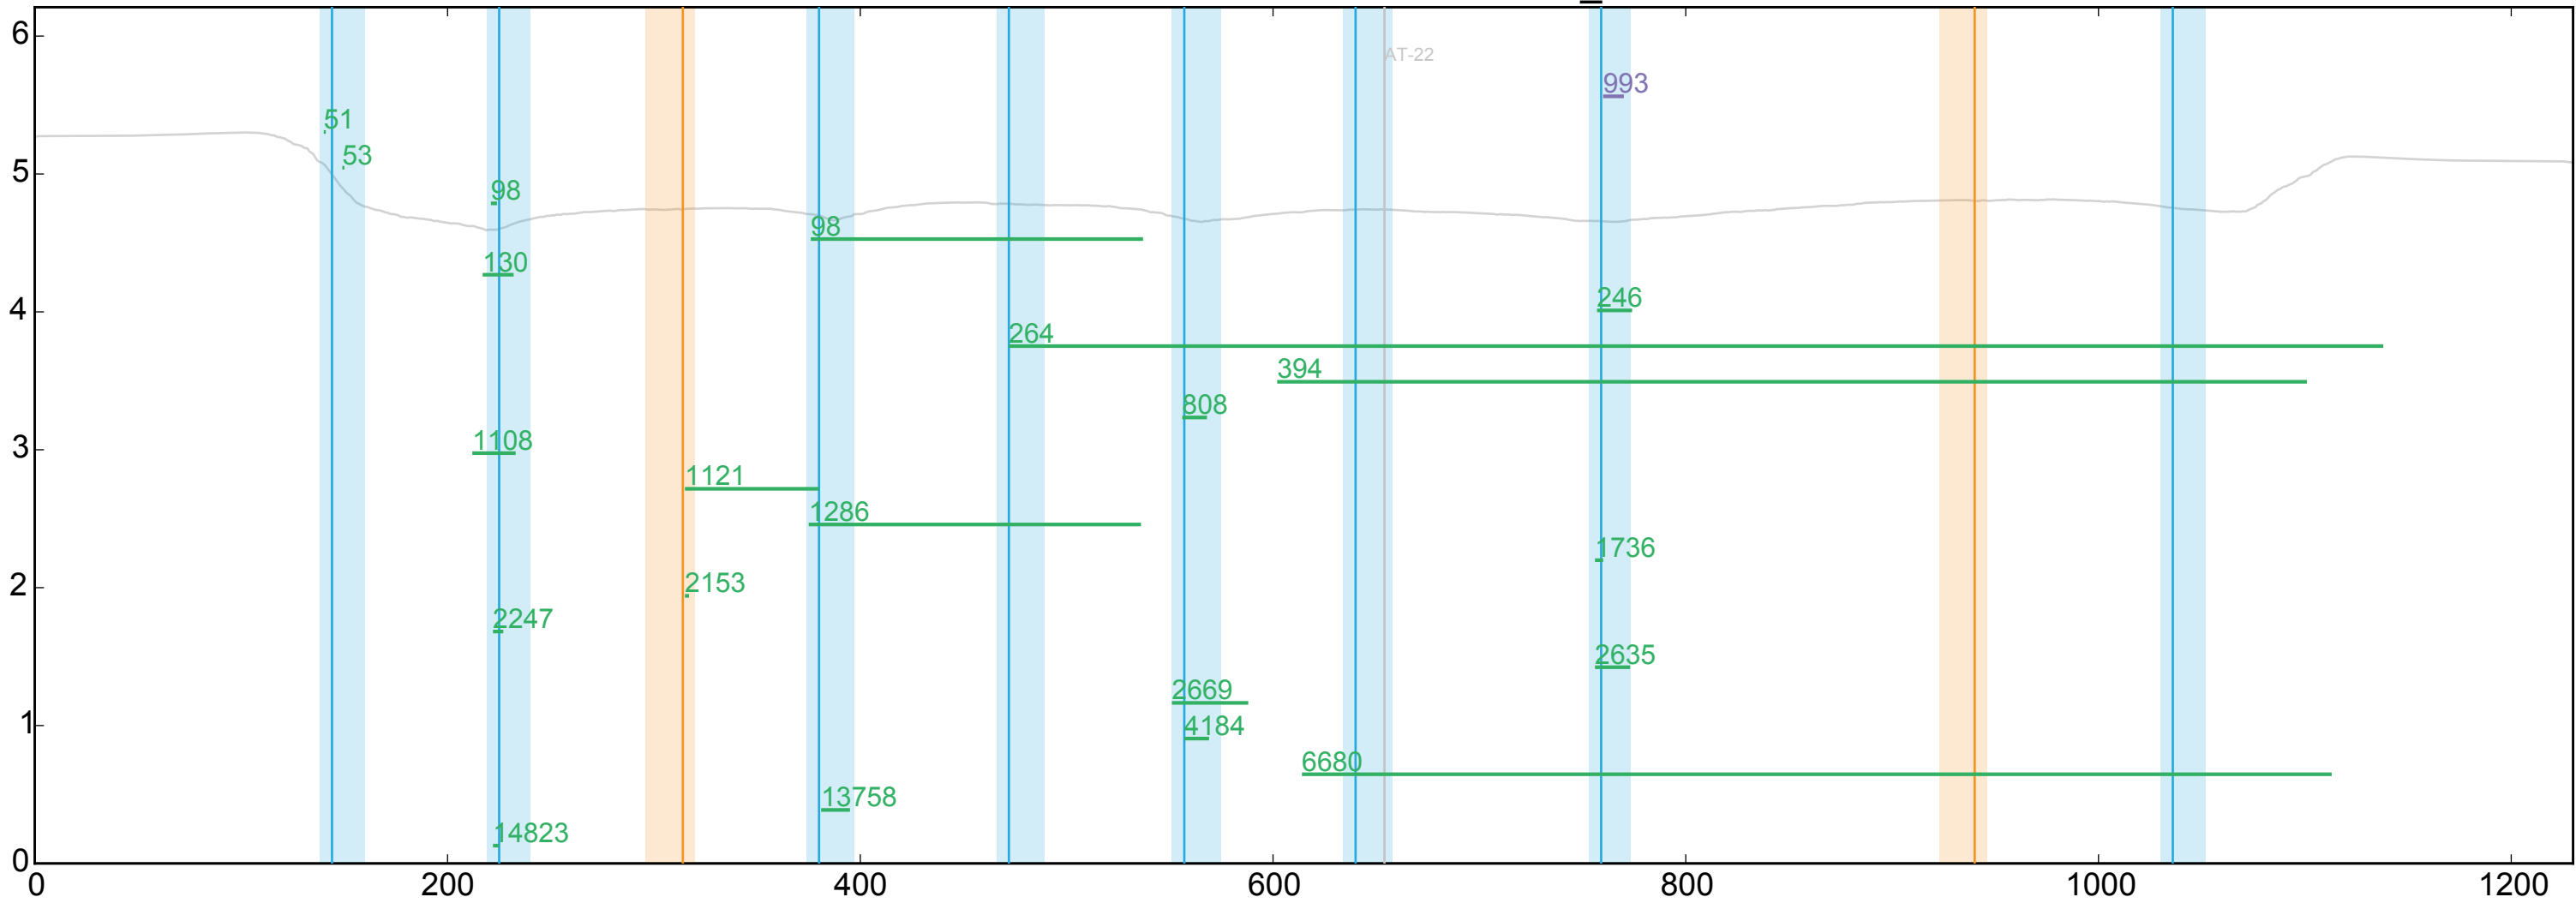

WT ENSDARG00000029045\_5

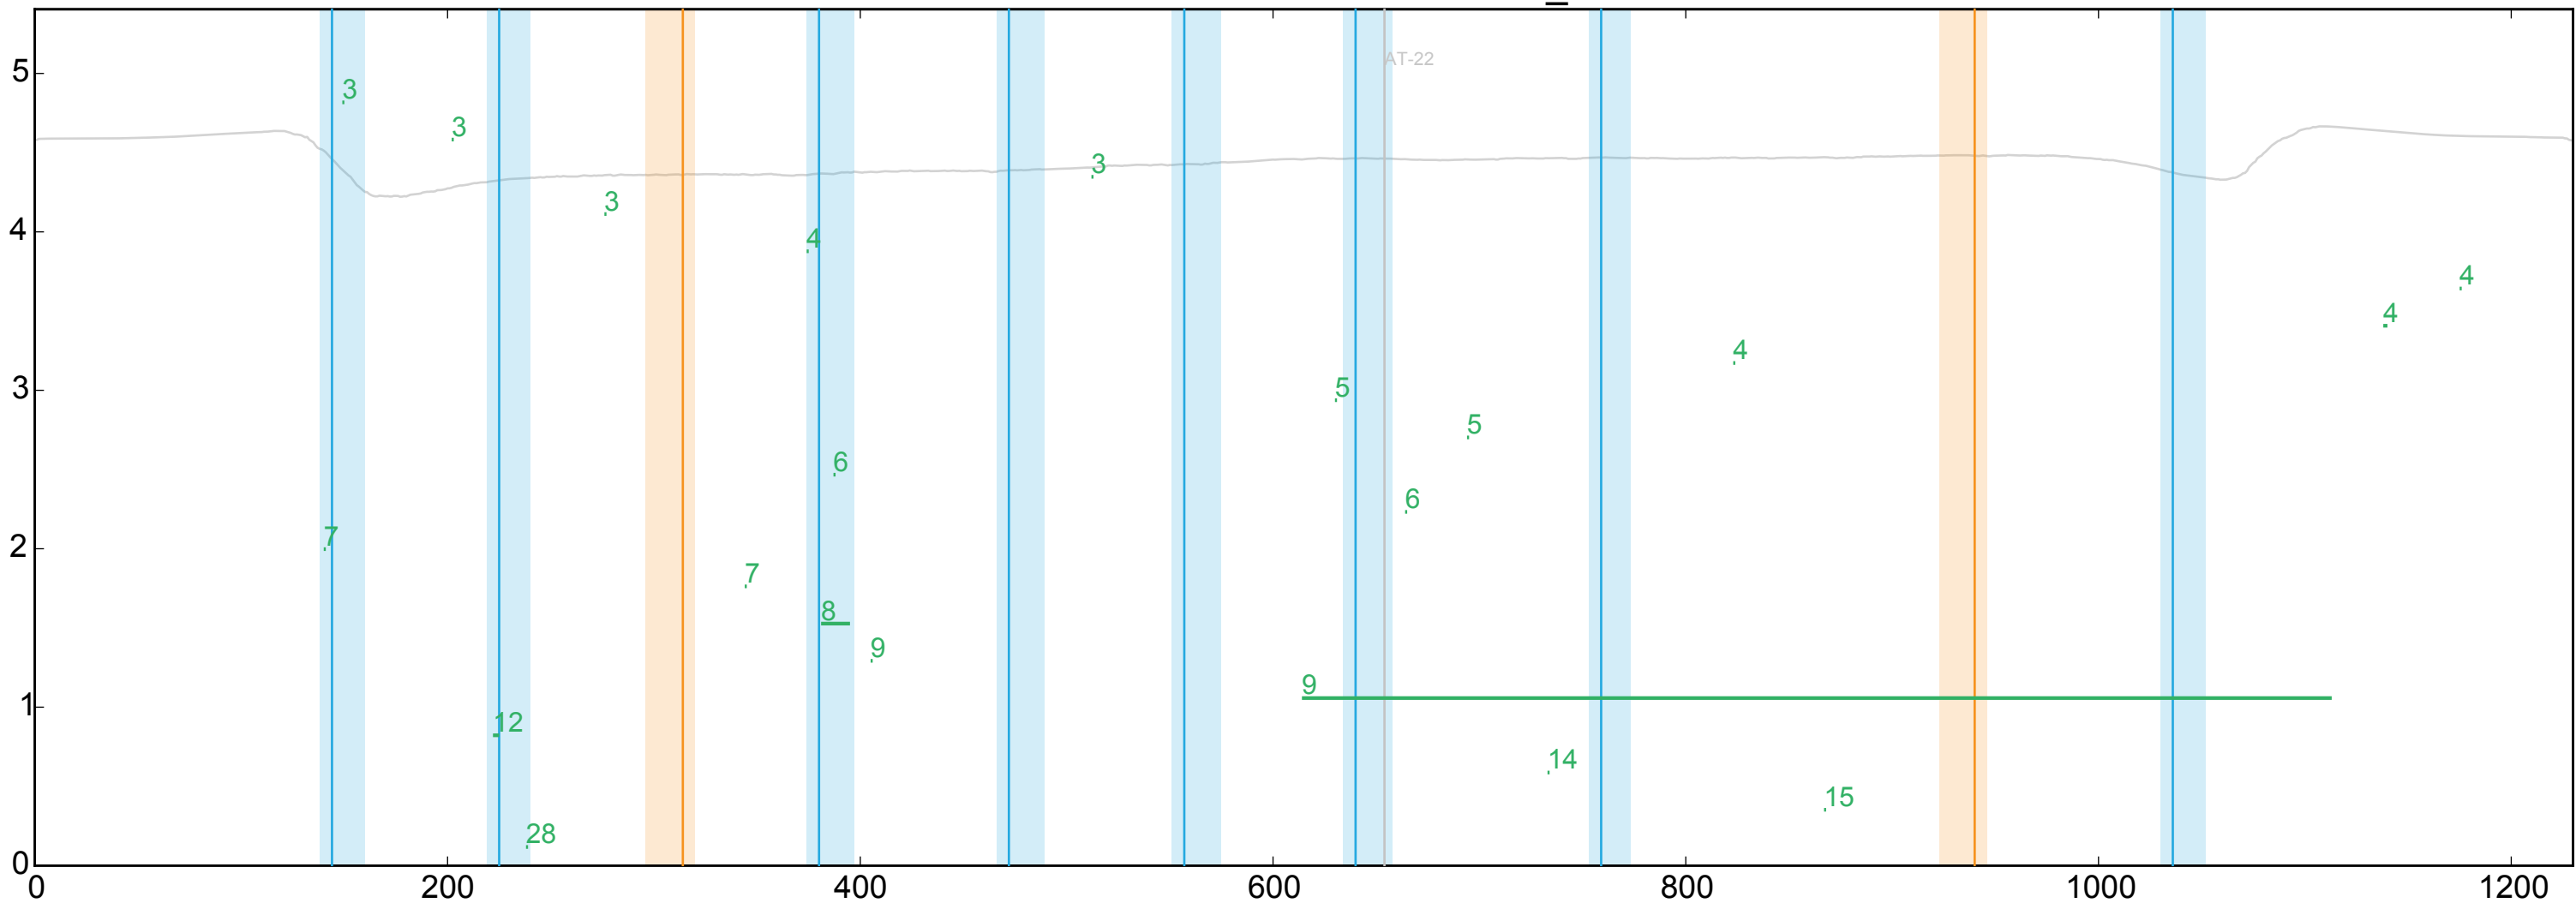

Mutant ENSDARG00000078582\_31

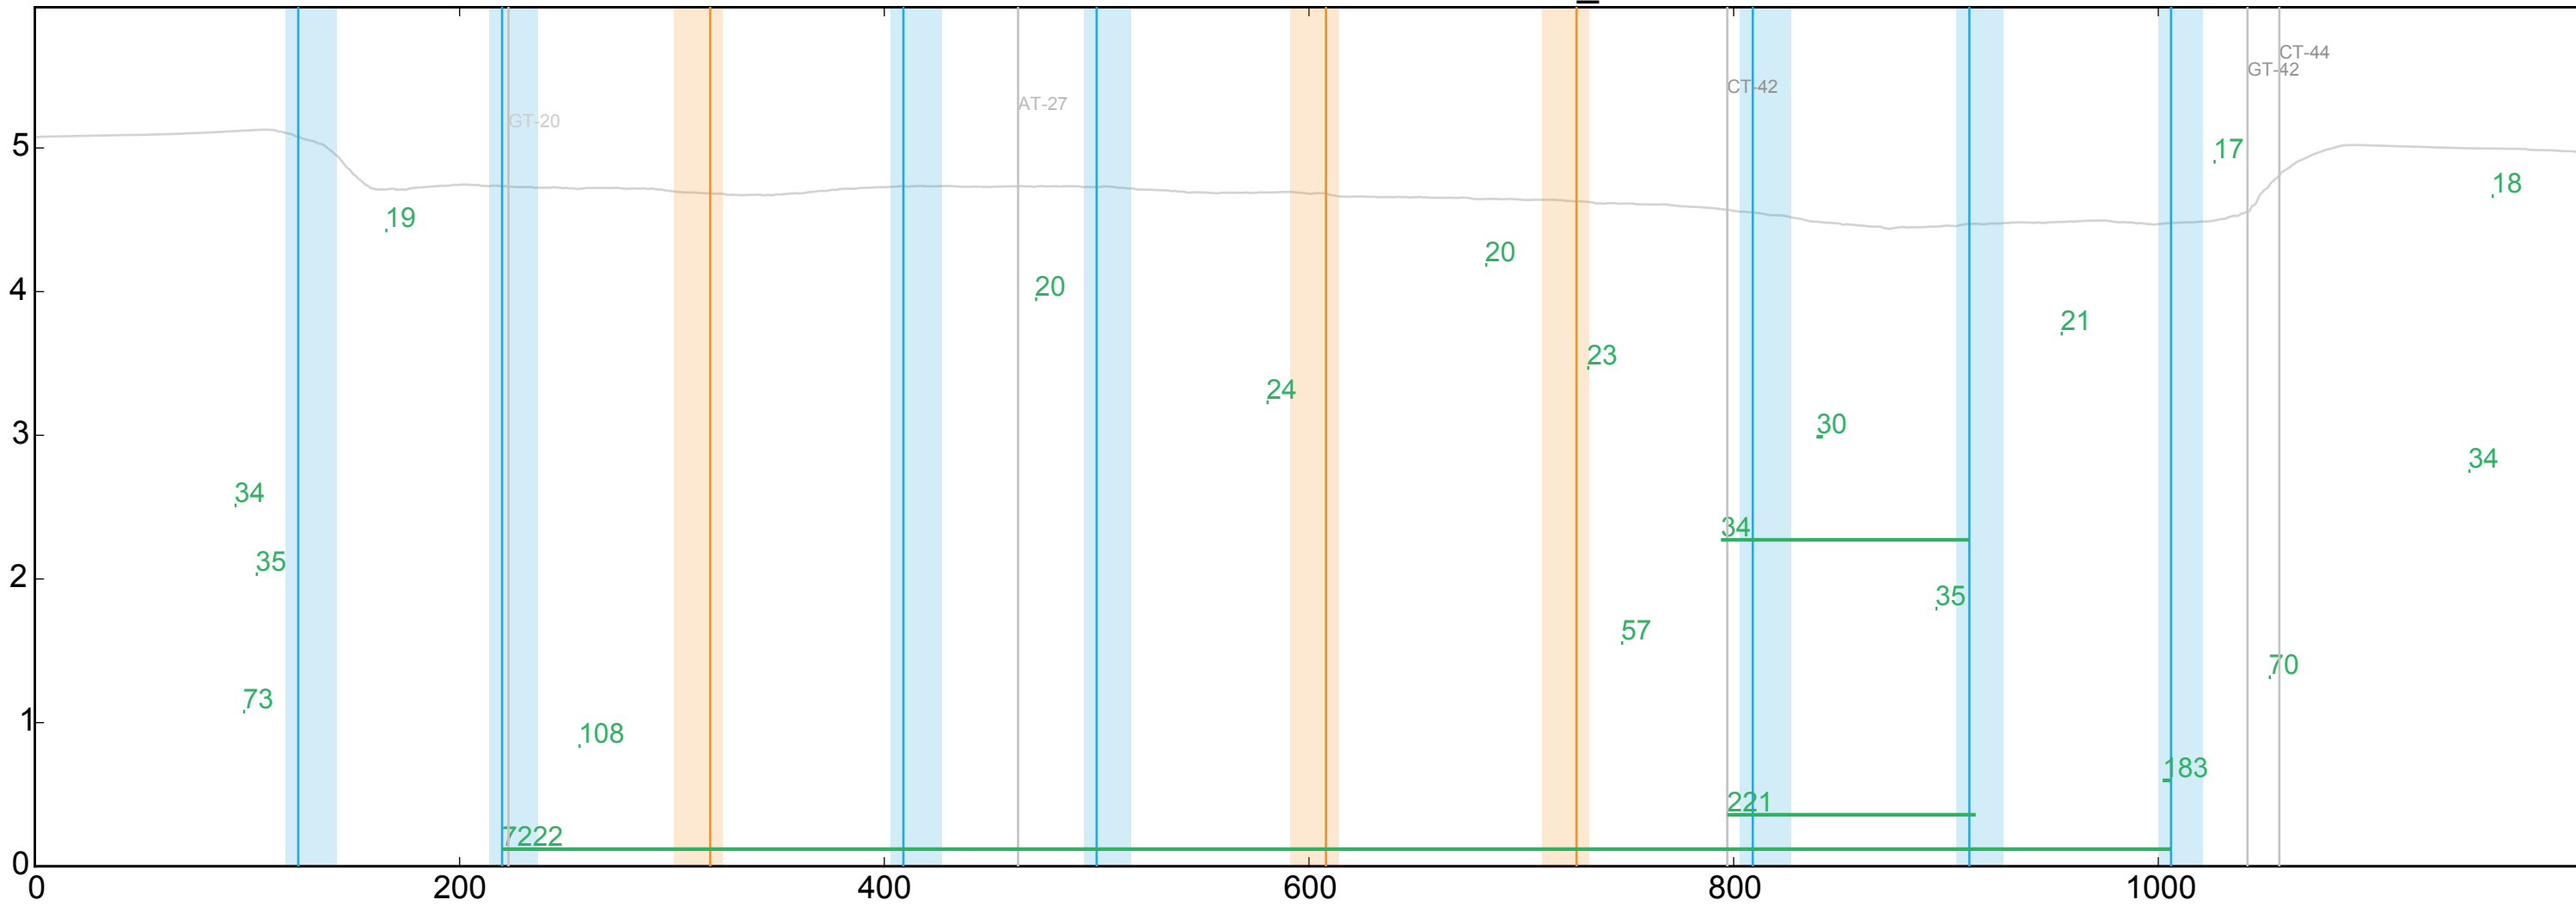

WT ENSDARG00000078582\_31

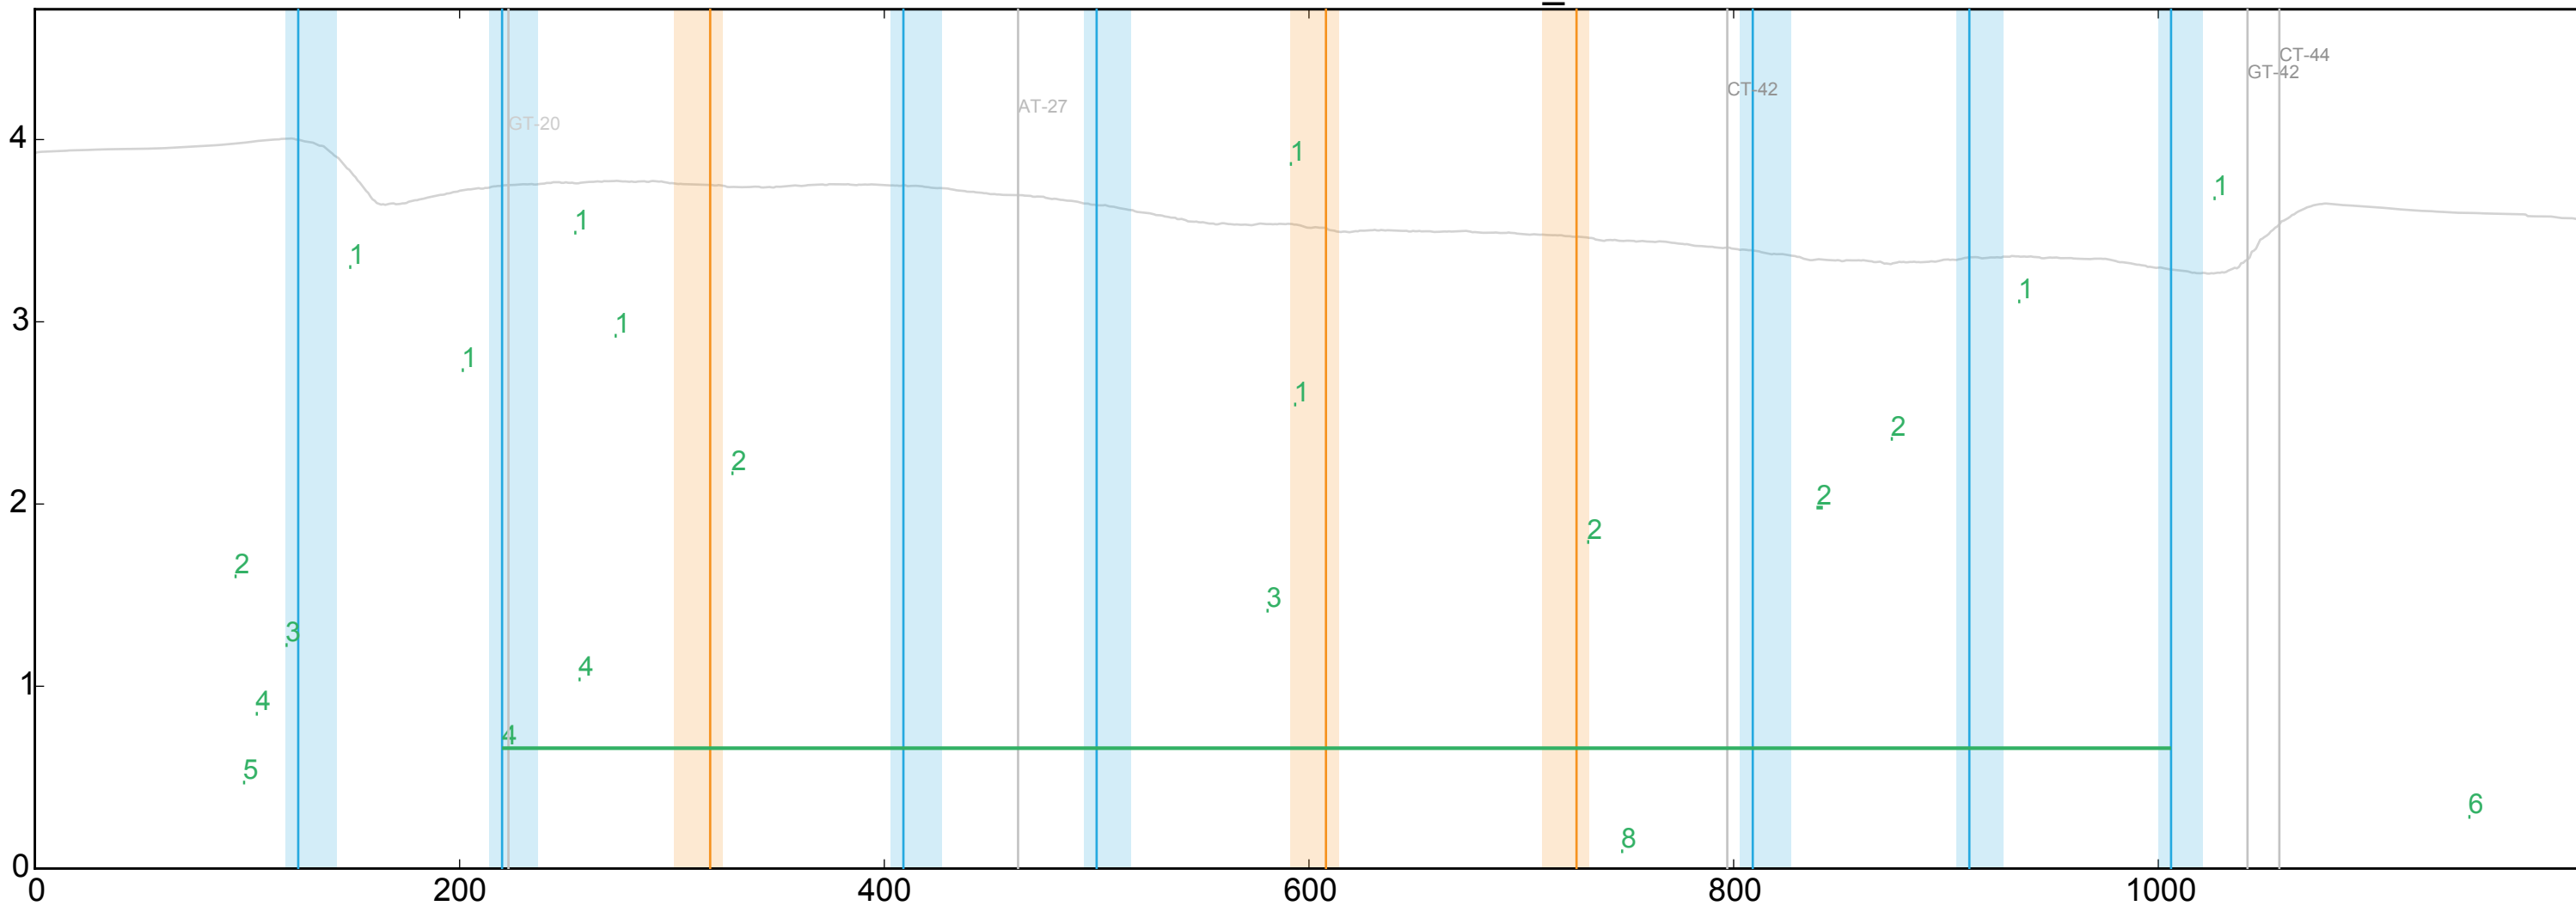

Mutant ENSDARG00000002193\_0

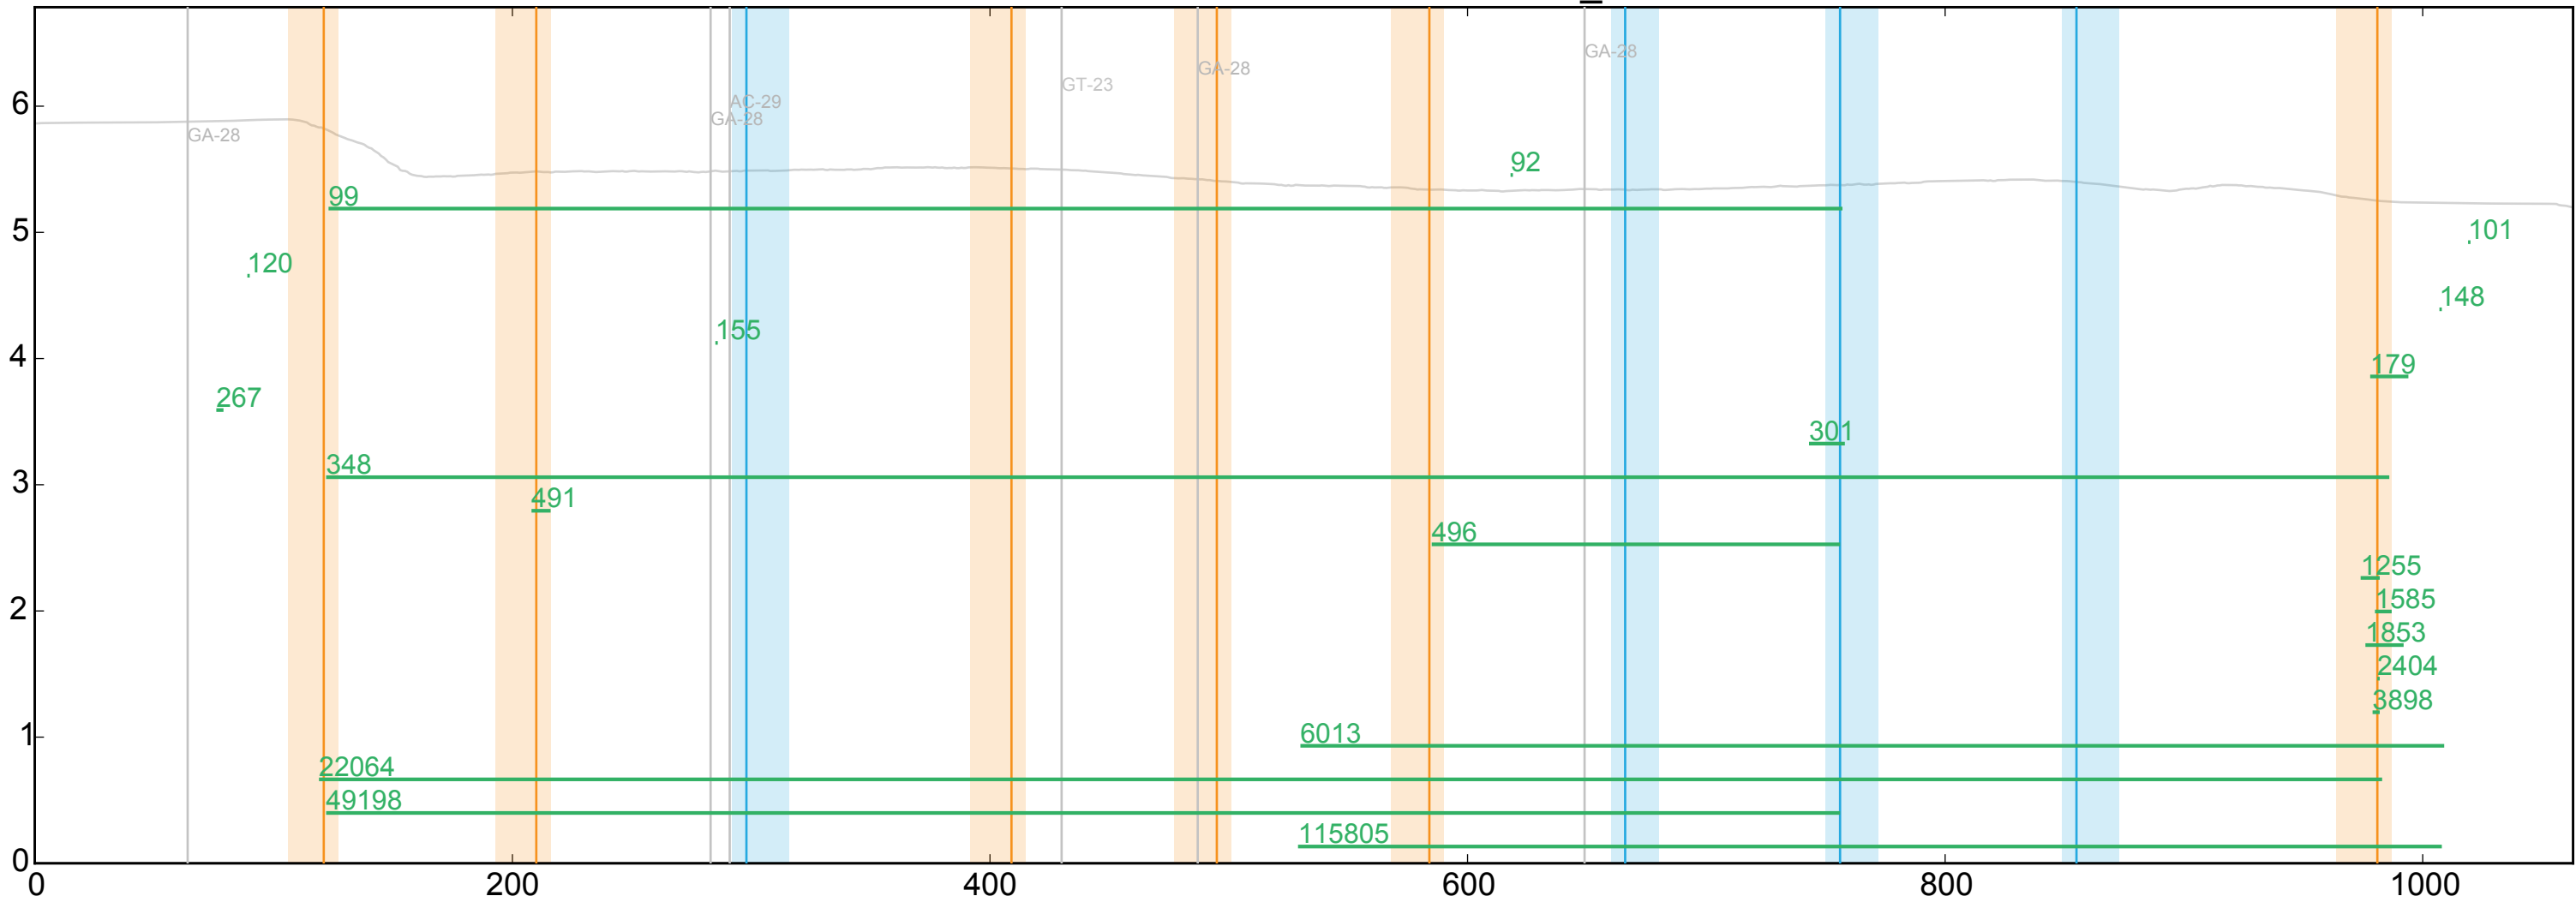

WT ENSDARG00000002193\_0

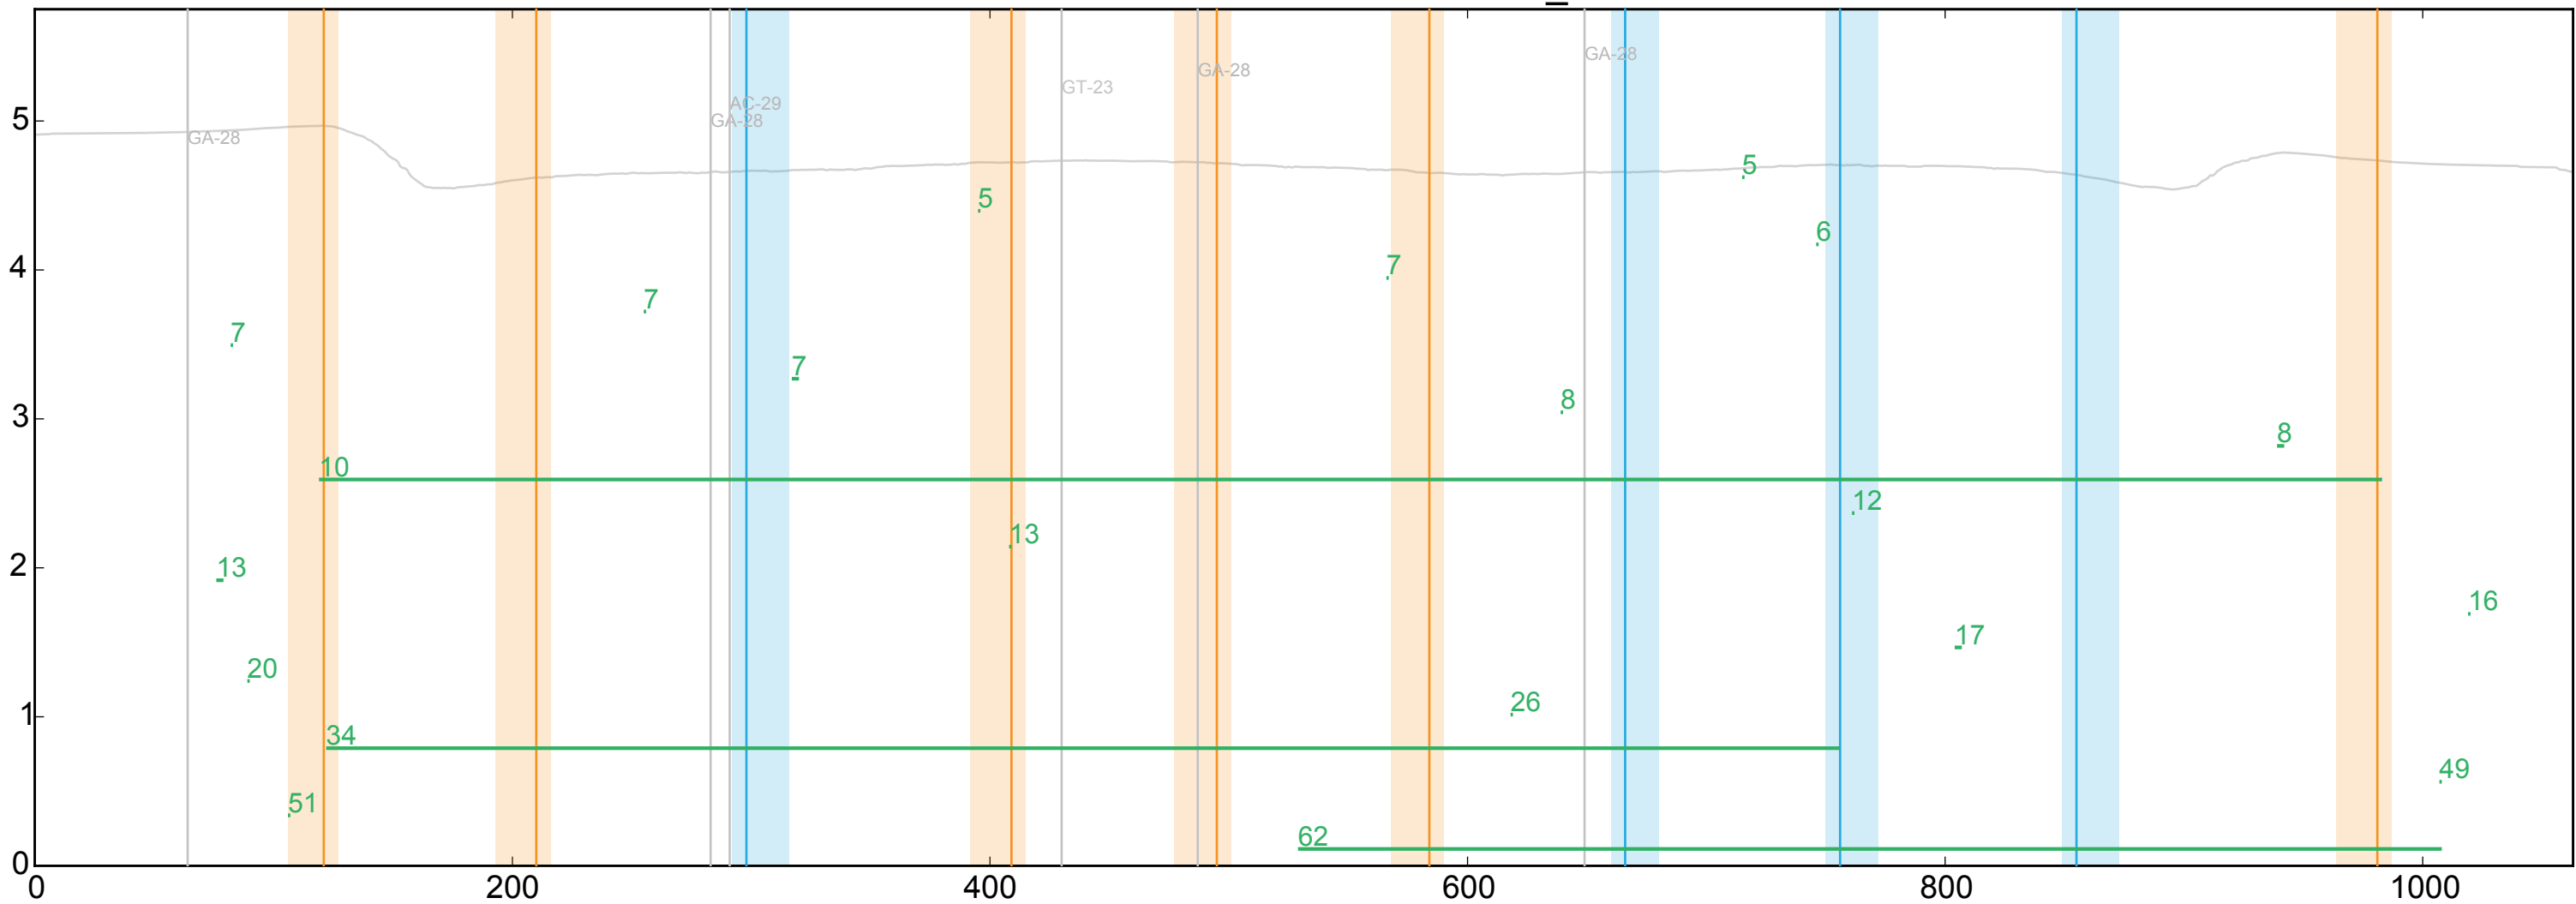

Mutant ENSDARG0000003751\_7

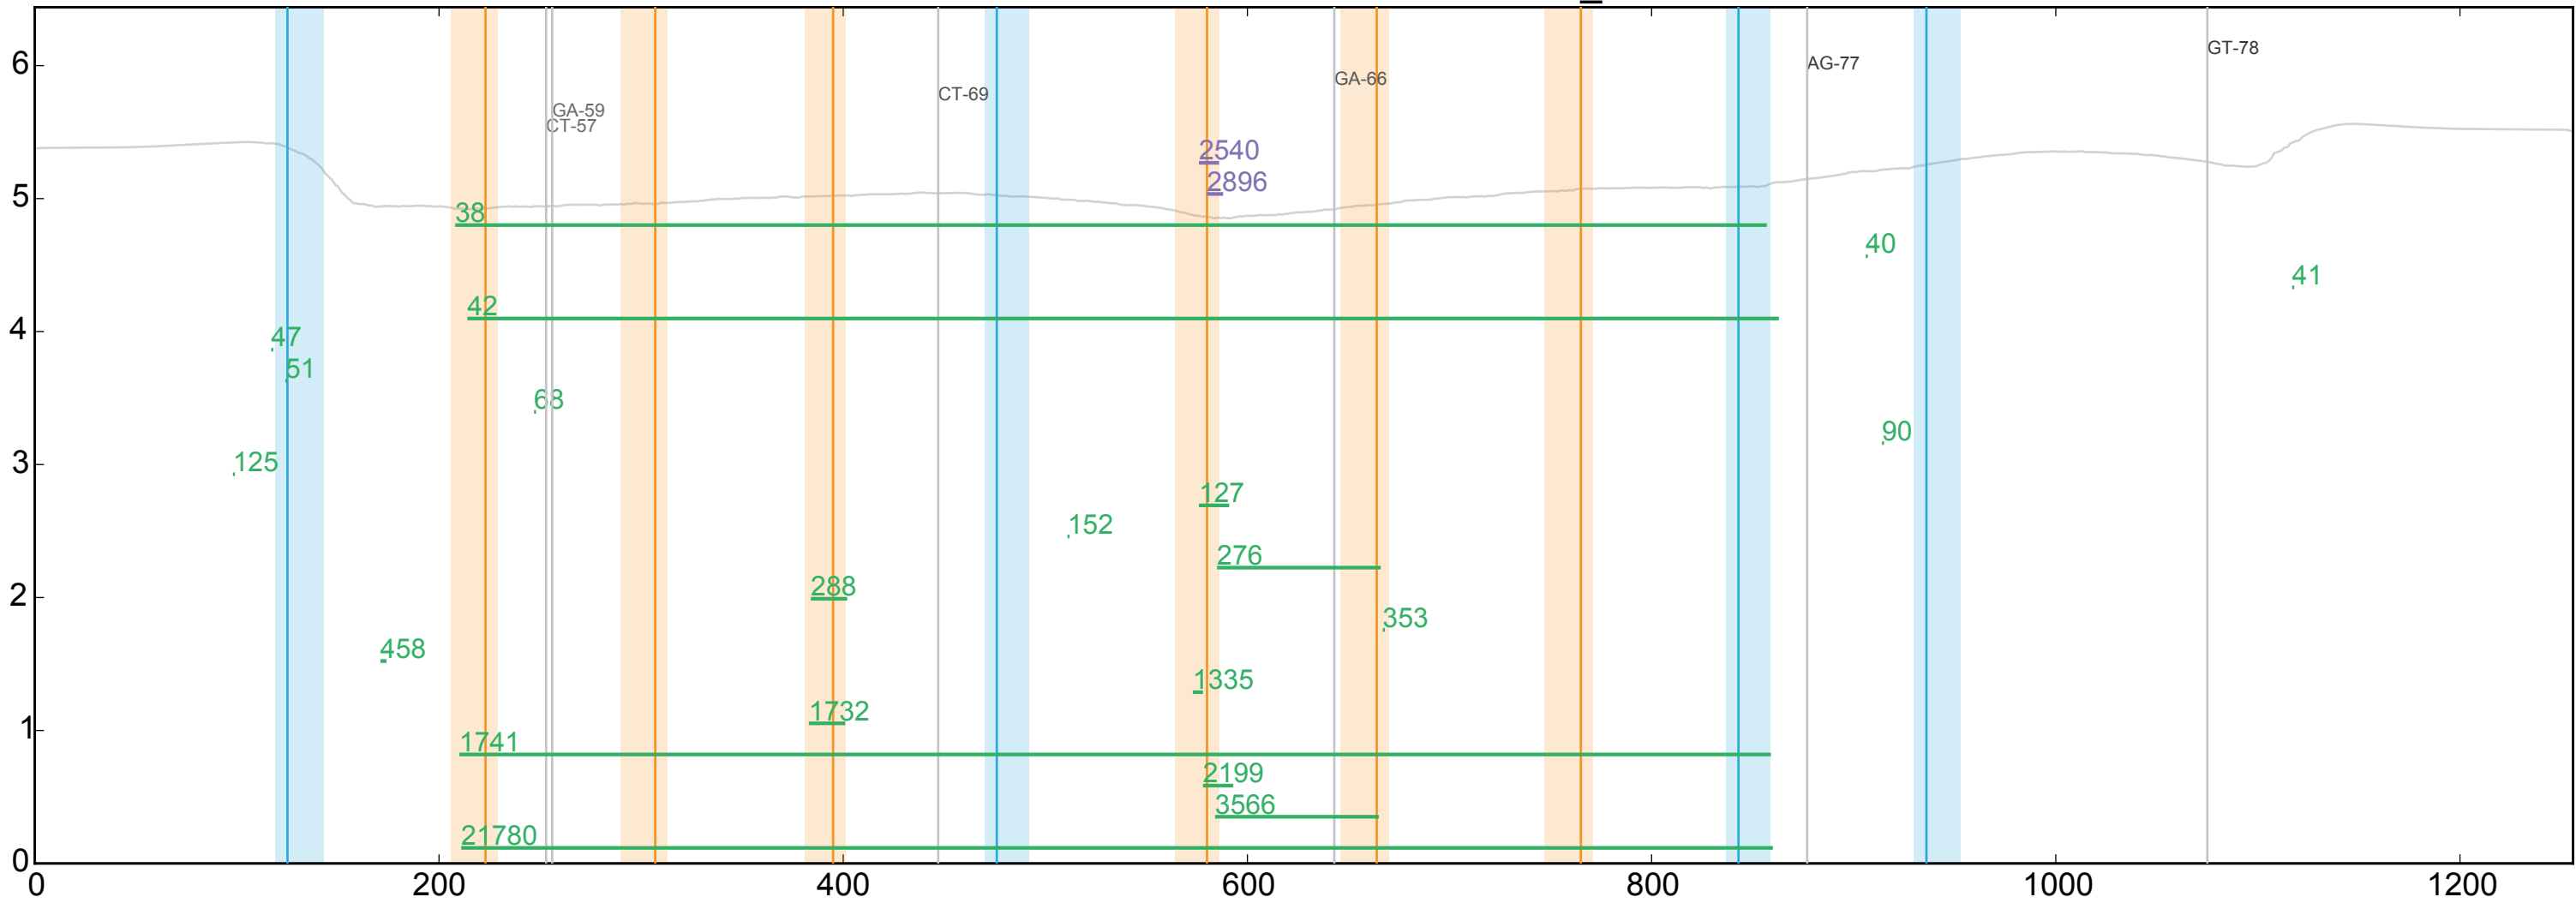

WT ENSDARG0000003751\_7

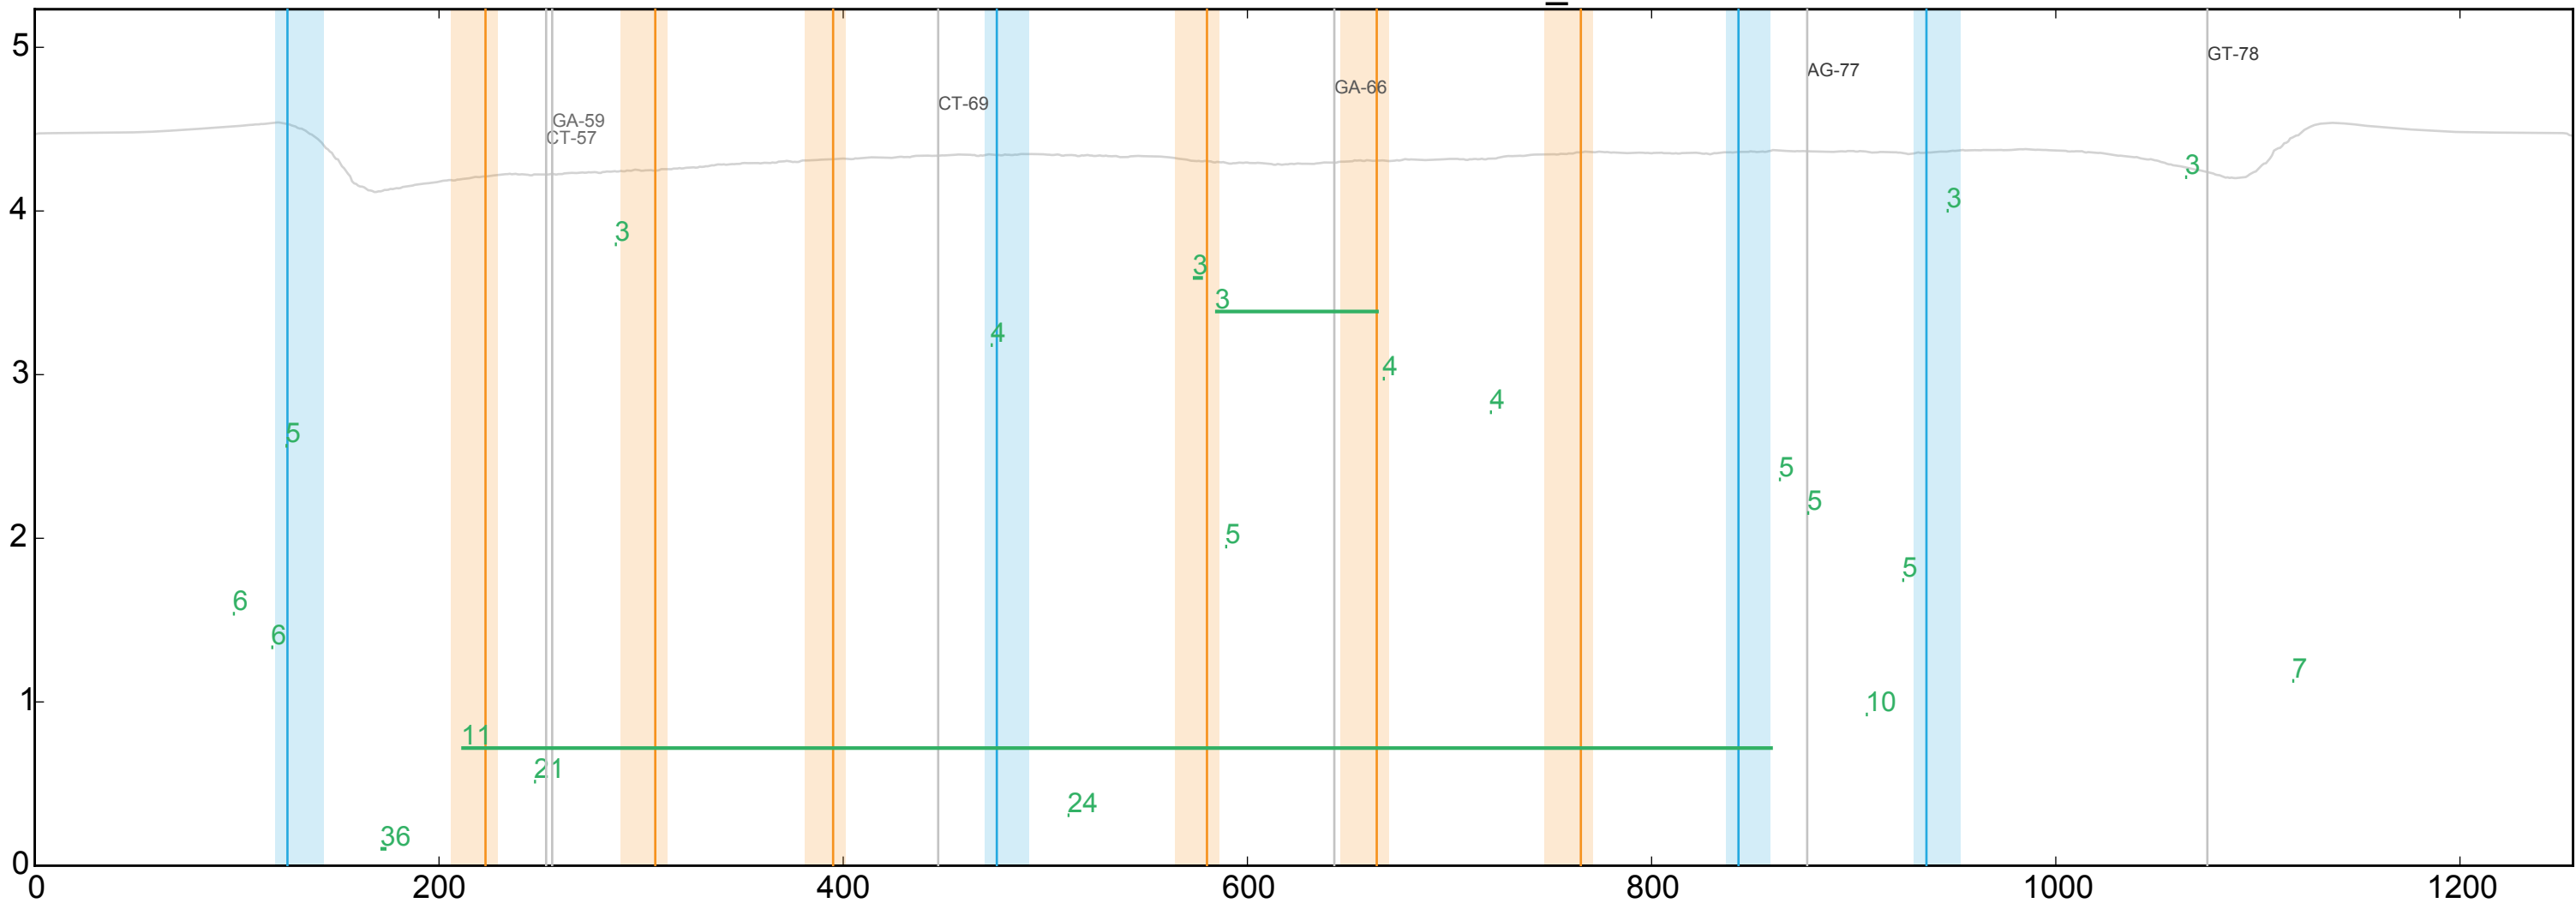

Mutant ENSDARG00000060073\_17

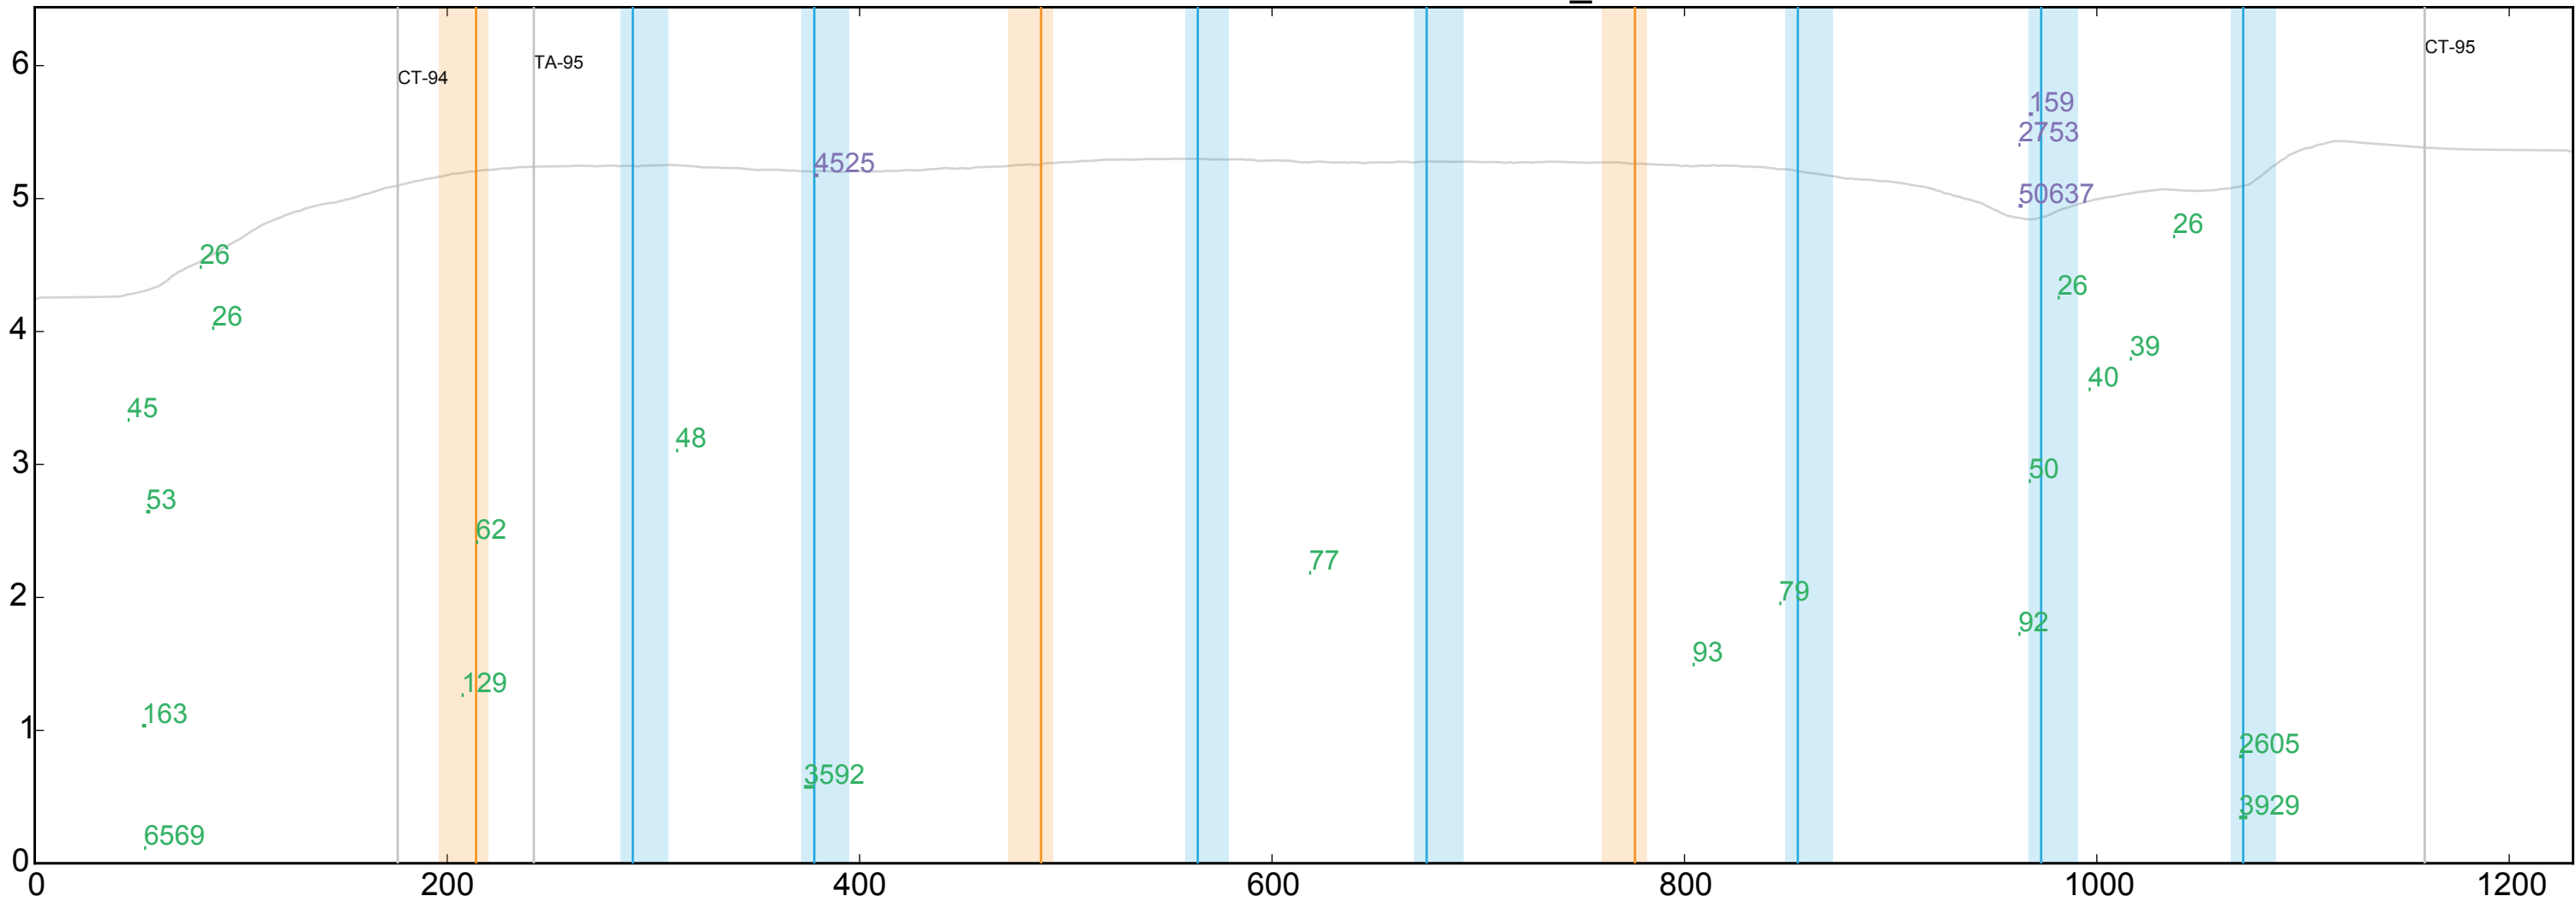

WT ENSDARG00000060073\_17

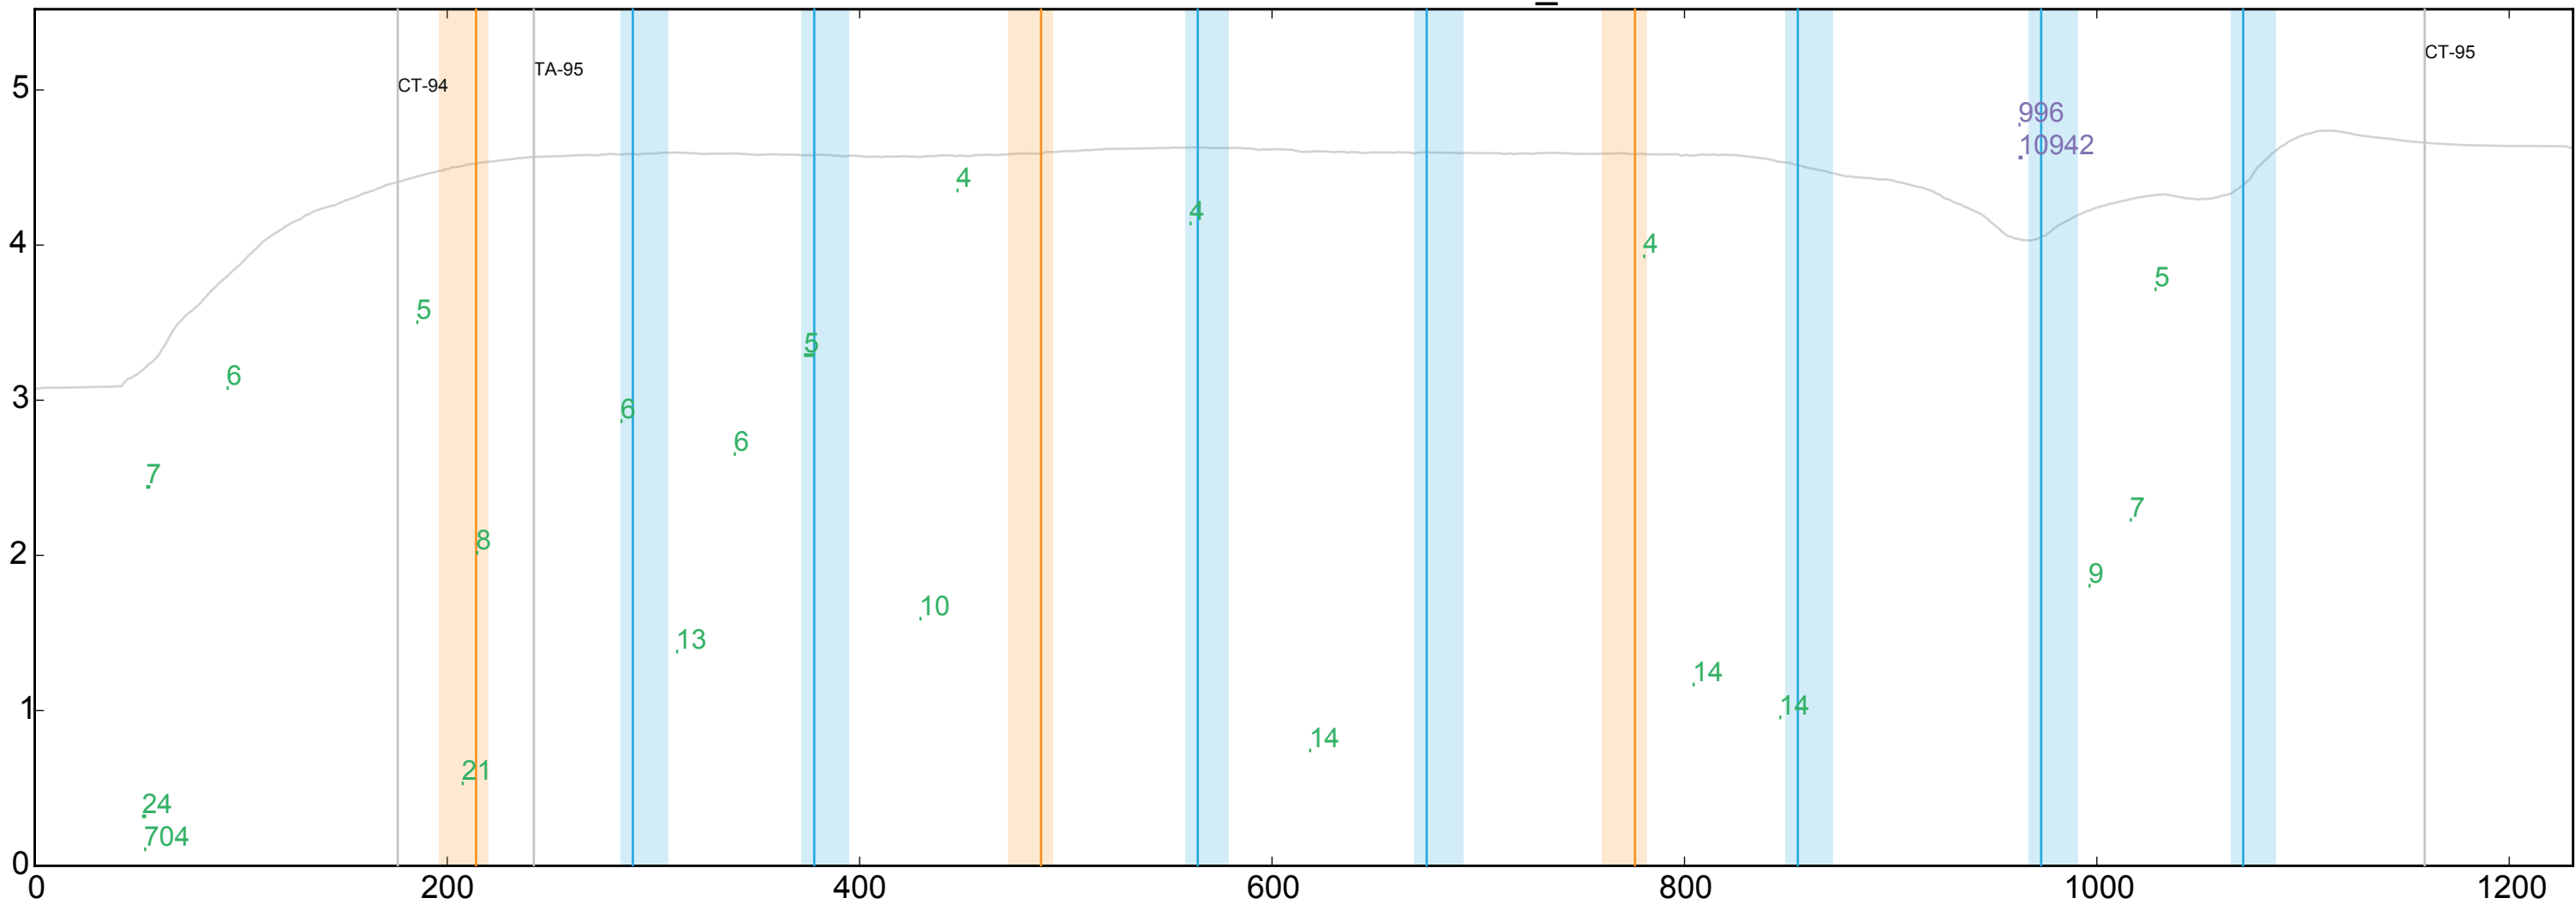



Mutant ENSDARG00000060697\_9

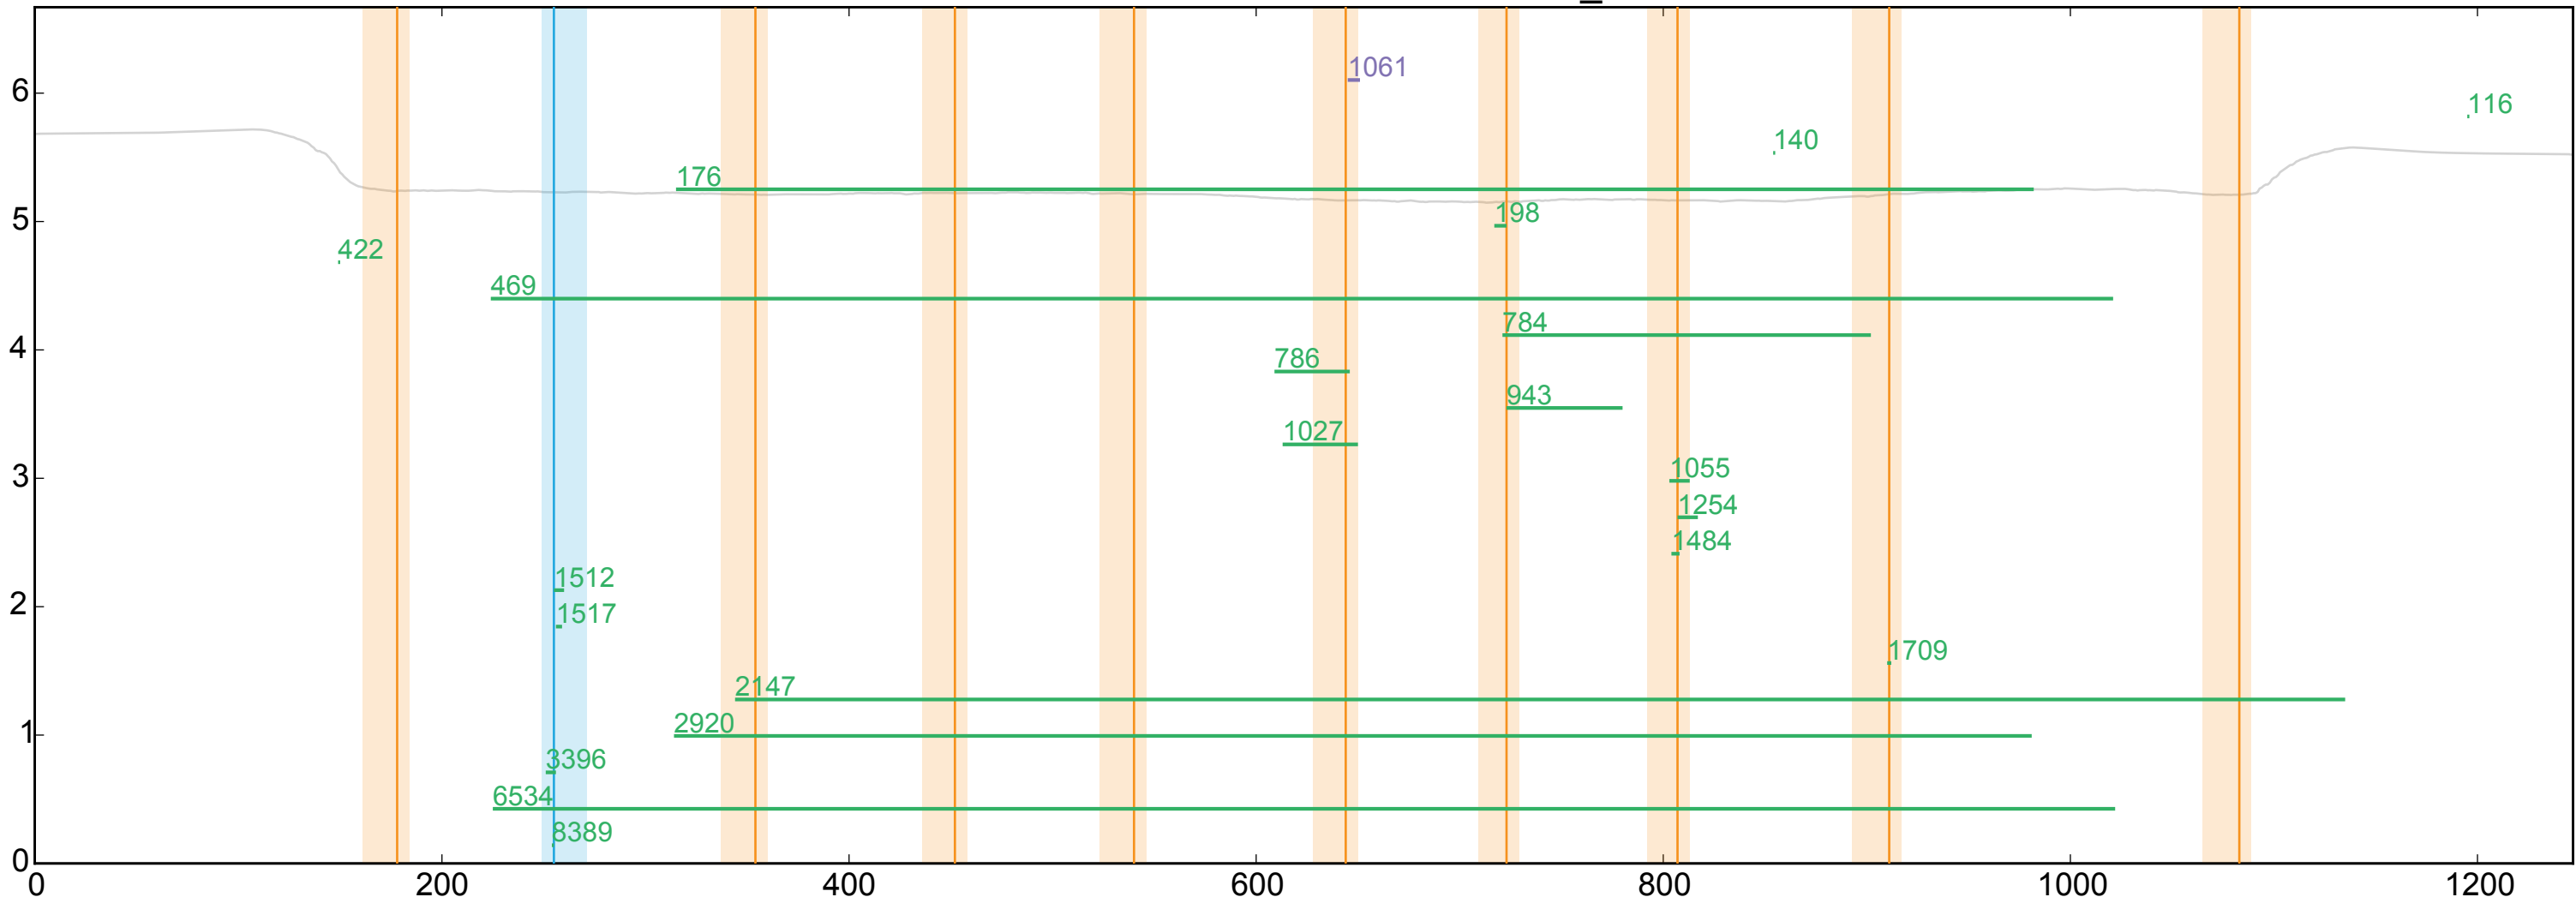

WT ENSDARG00000060697\_9

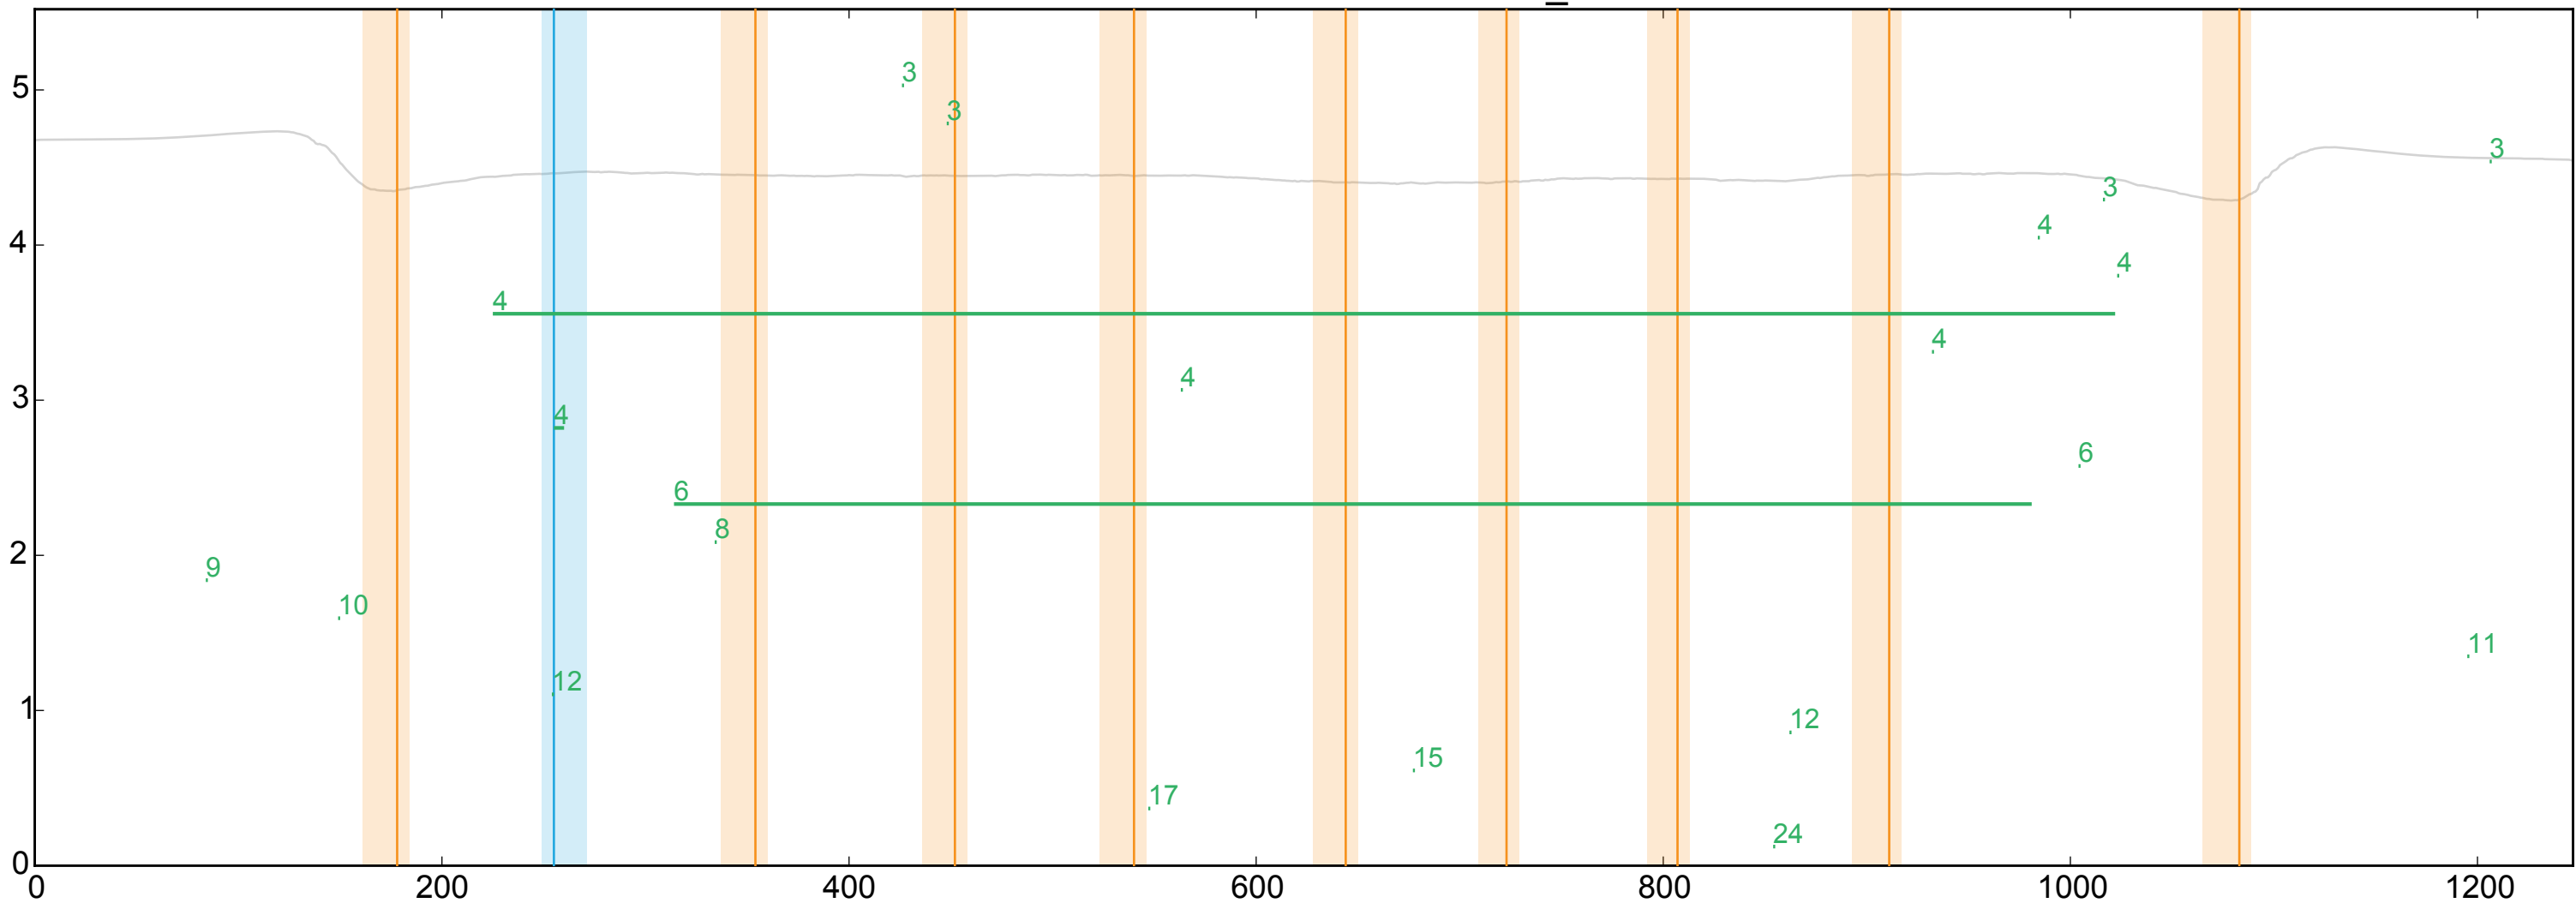

Mutant ENSDARG00000078578\_0

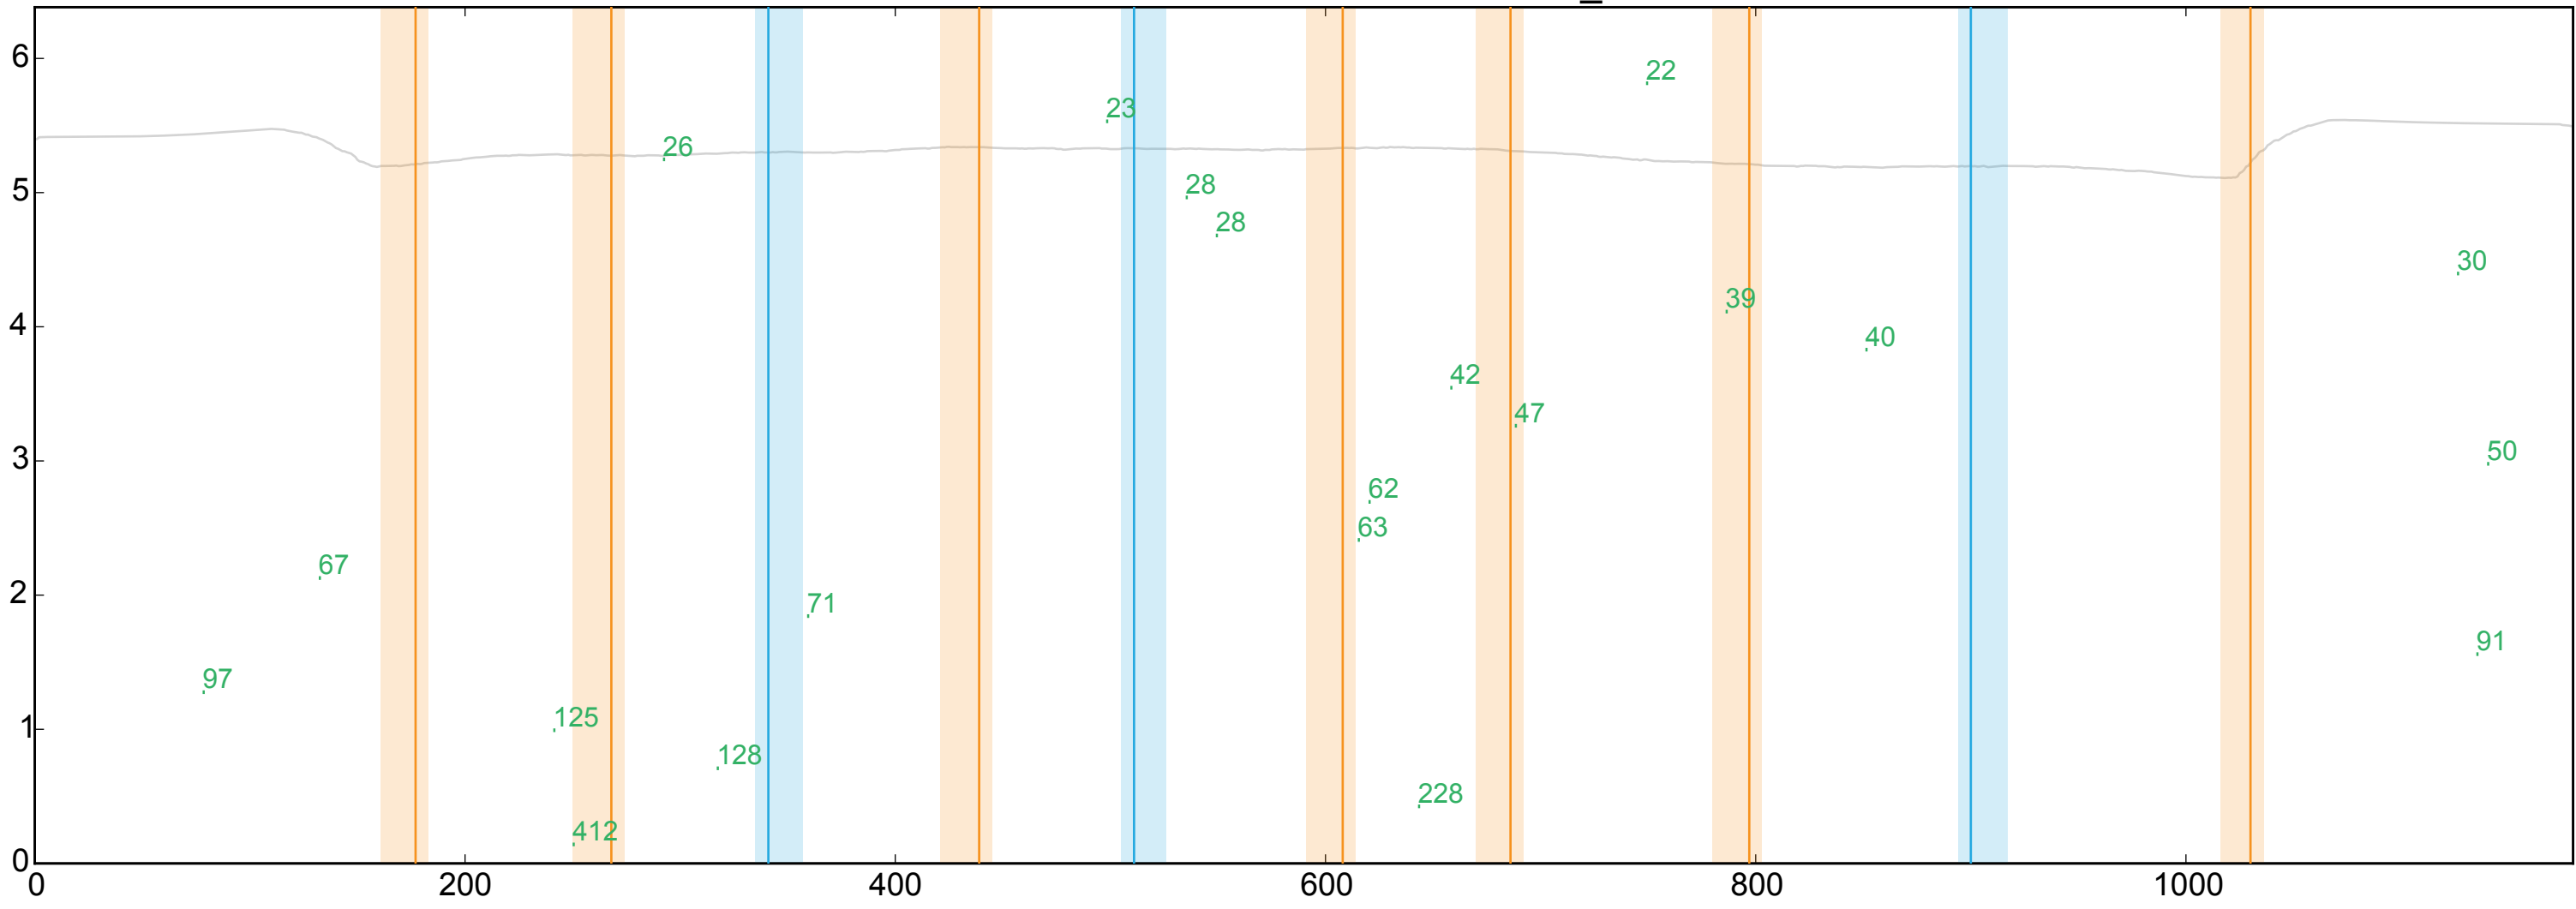

WT ENSDARG00000078578\_0

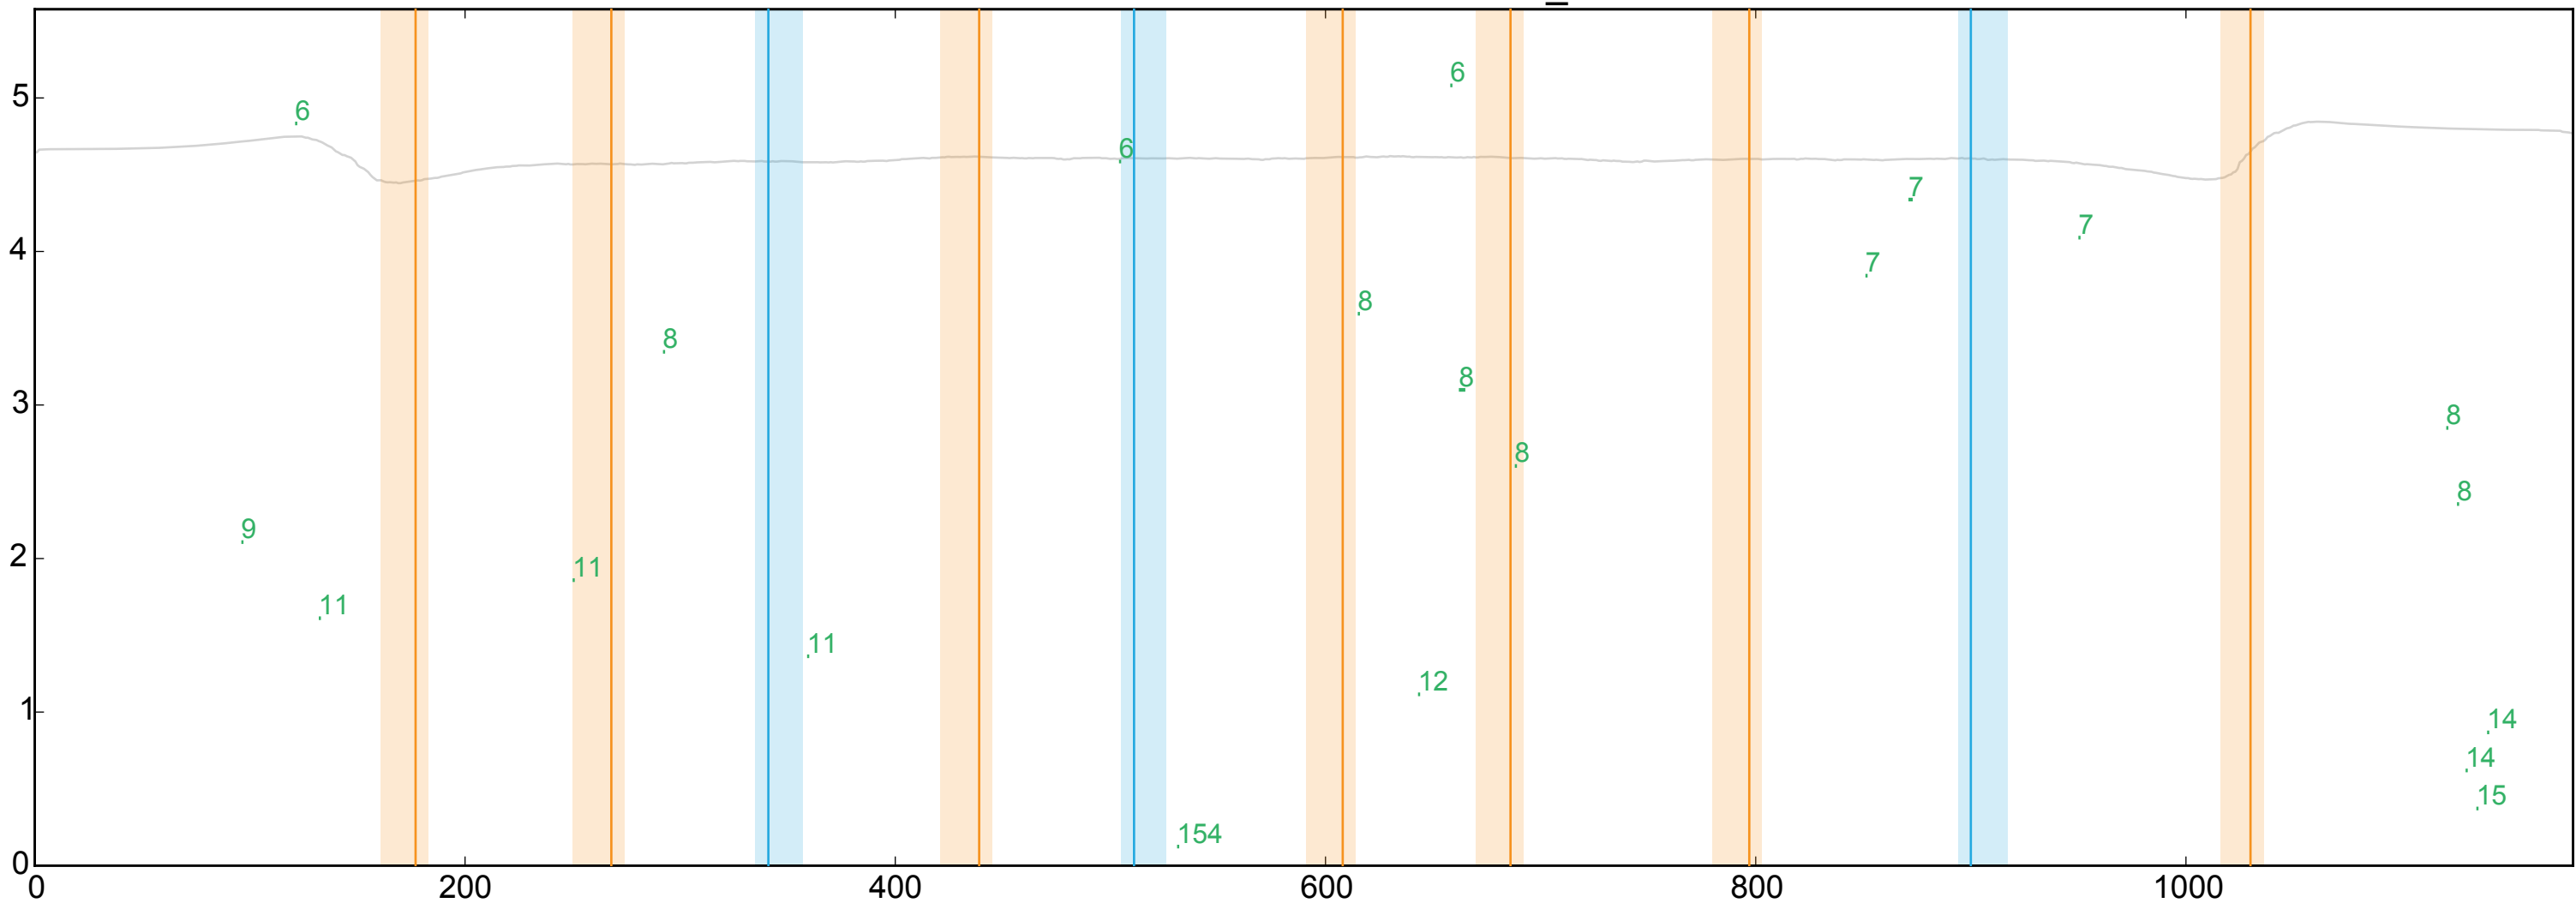

Mutant ENSDARG00000061685\_0

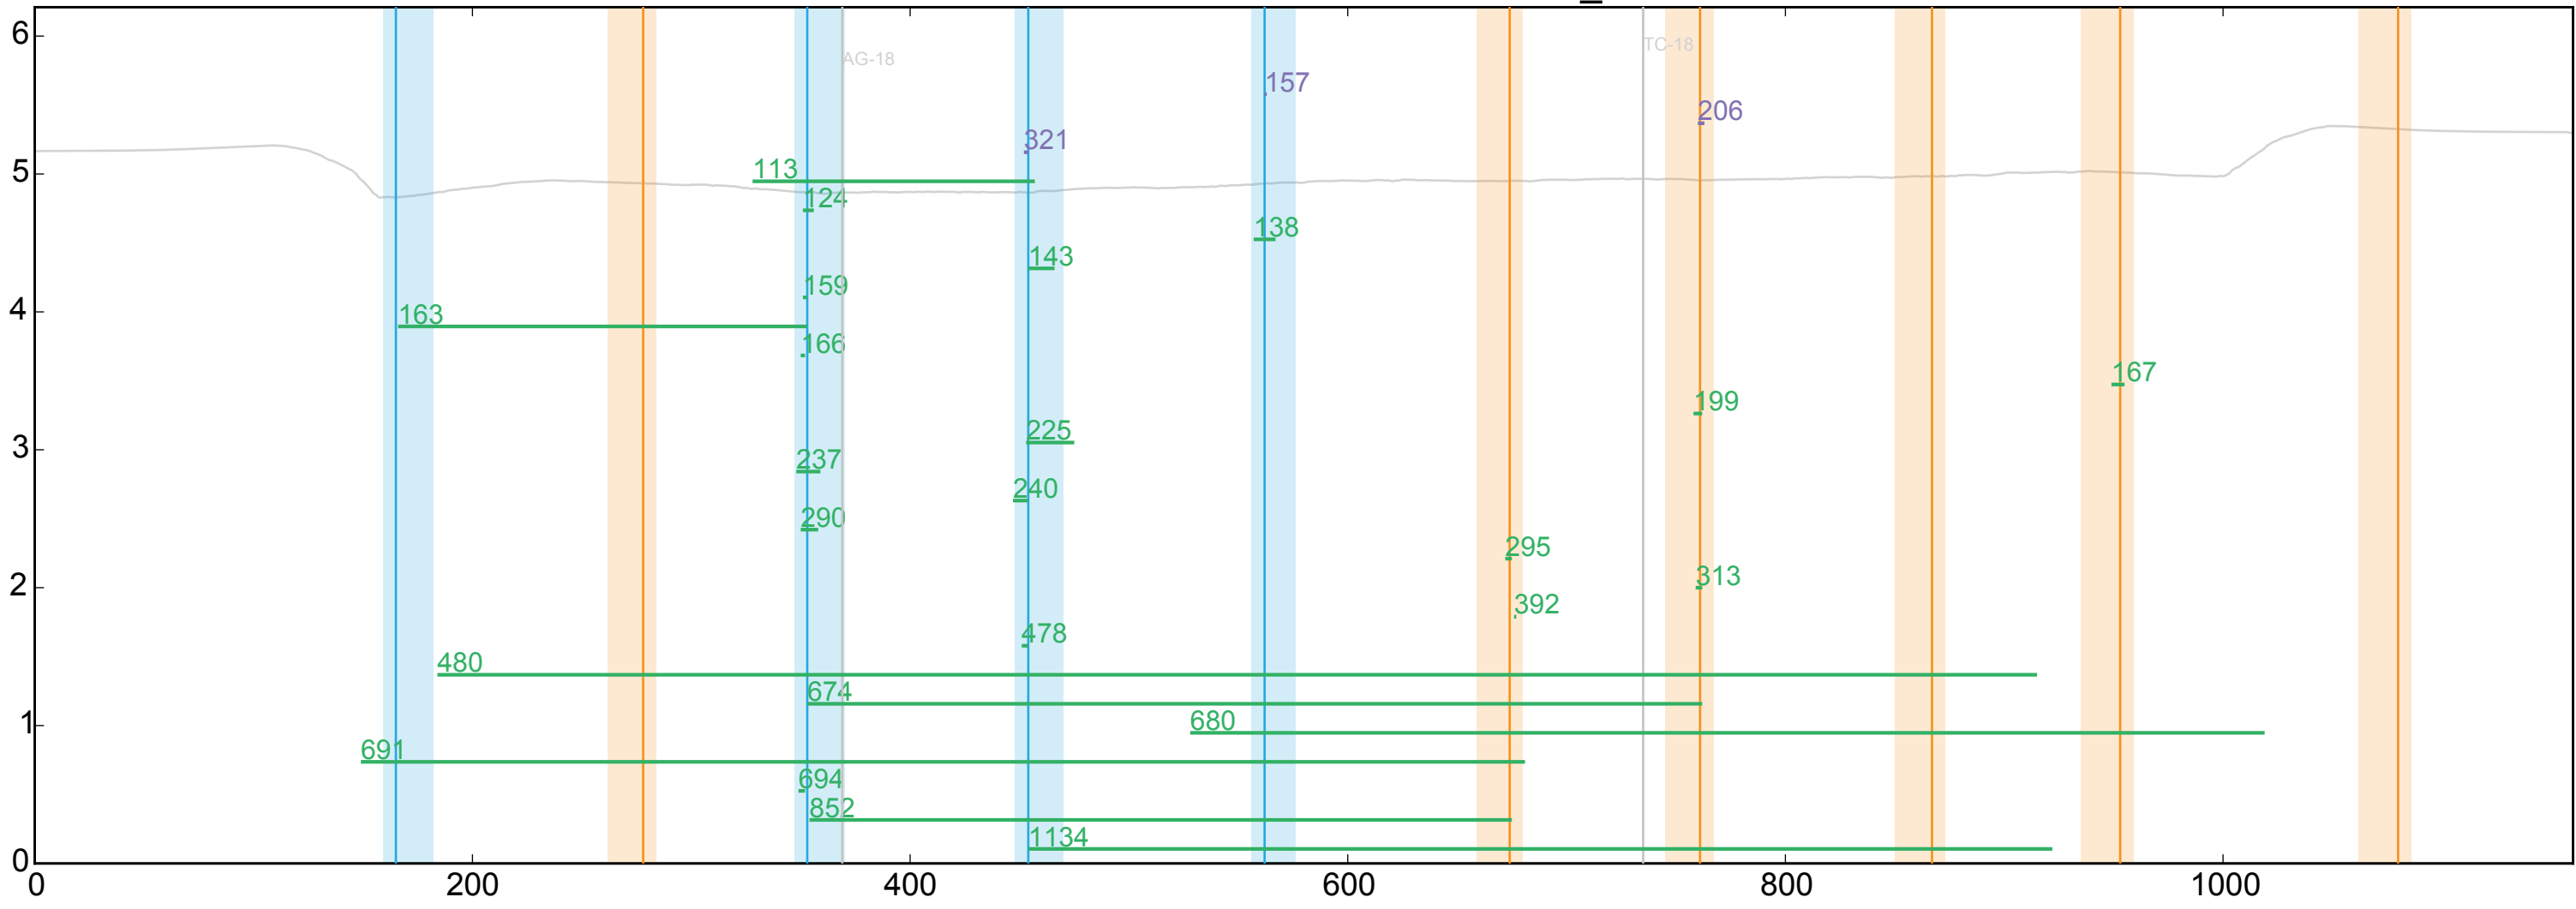

WT ENSDARG00000061685\_0

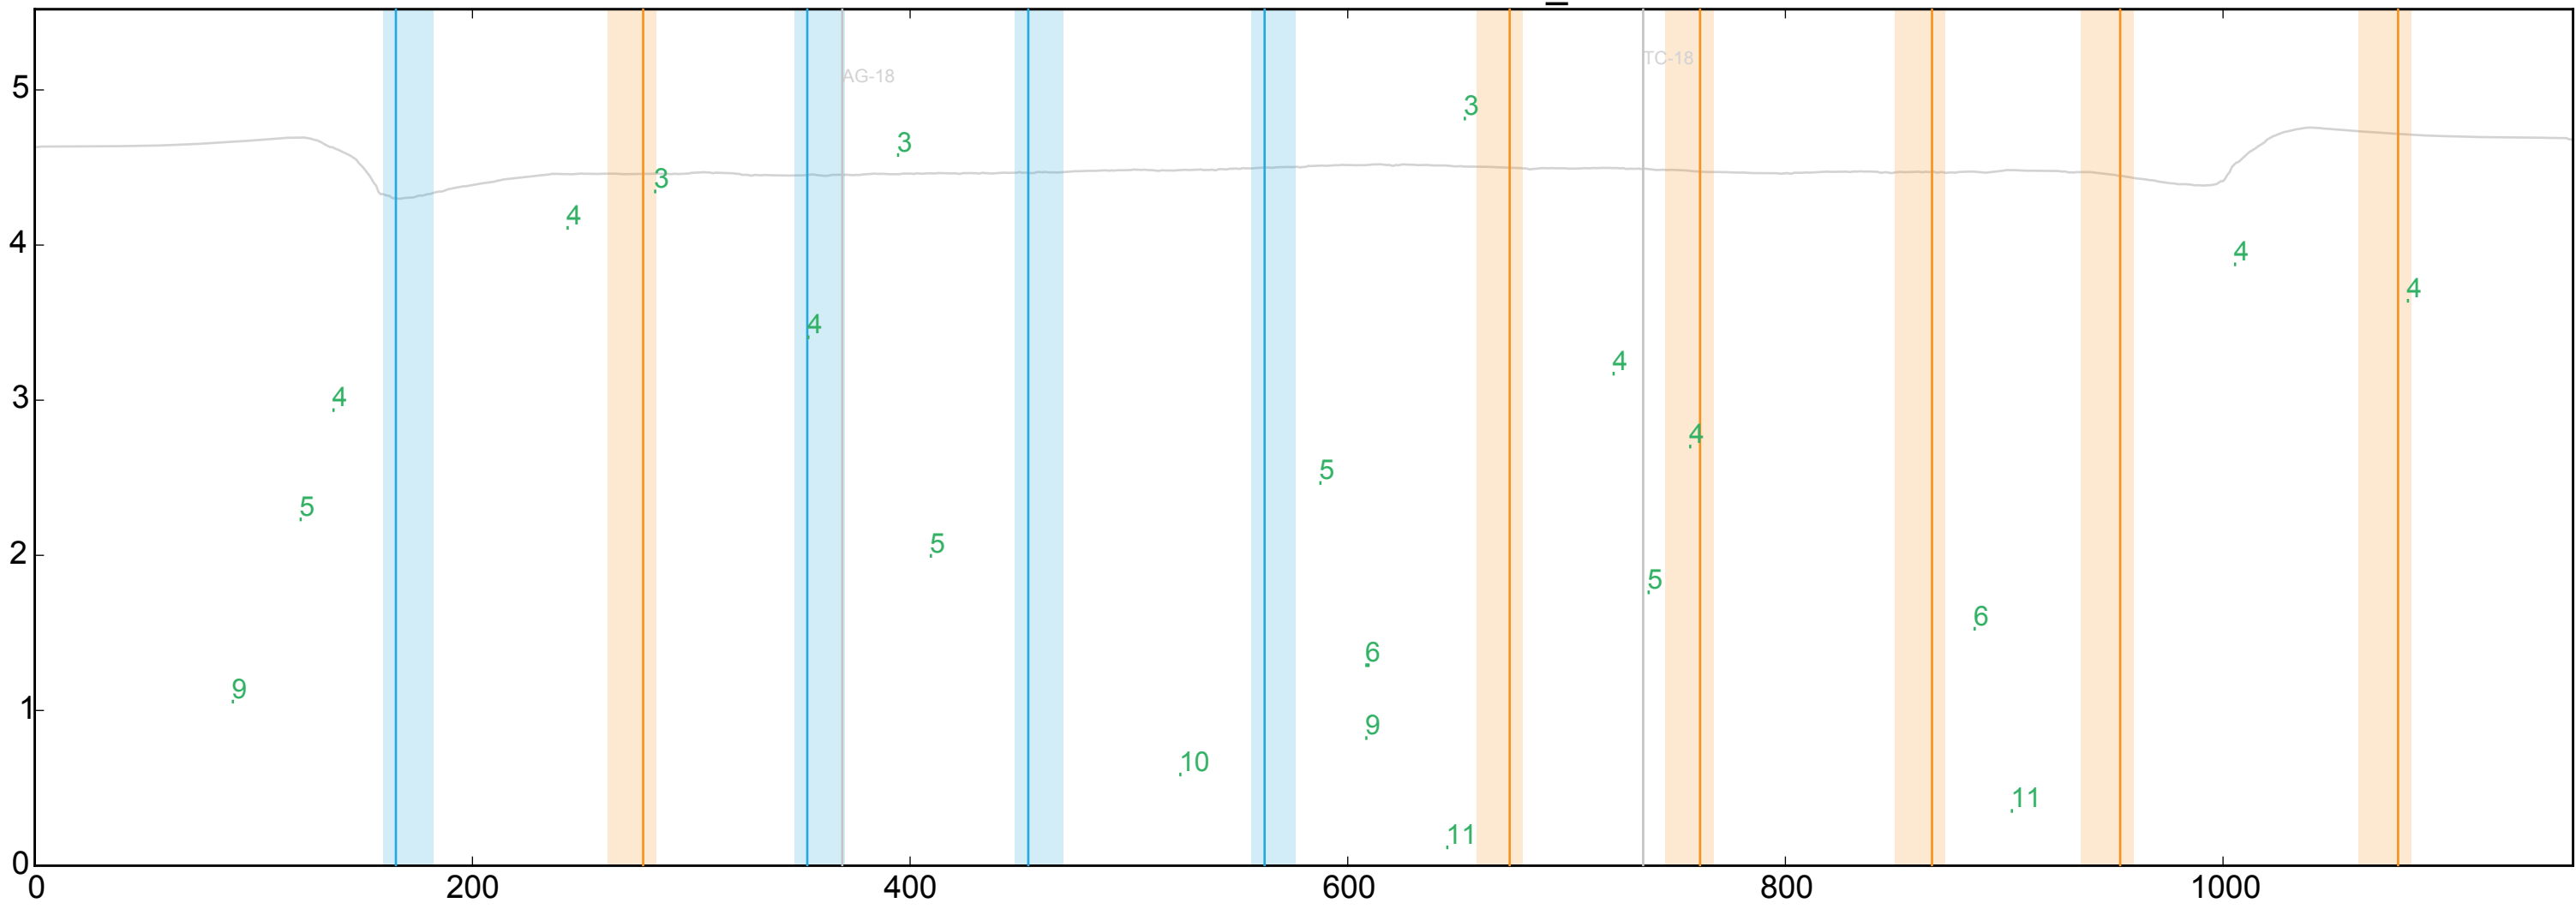

Mutant ENSDARG00000003469\_0

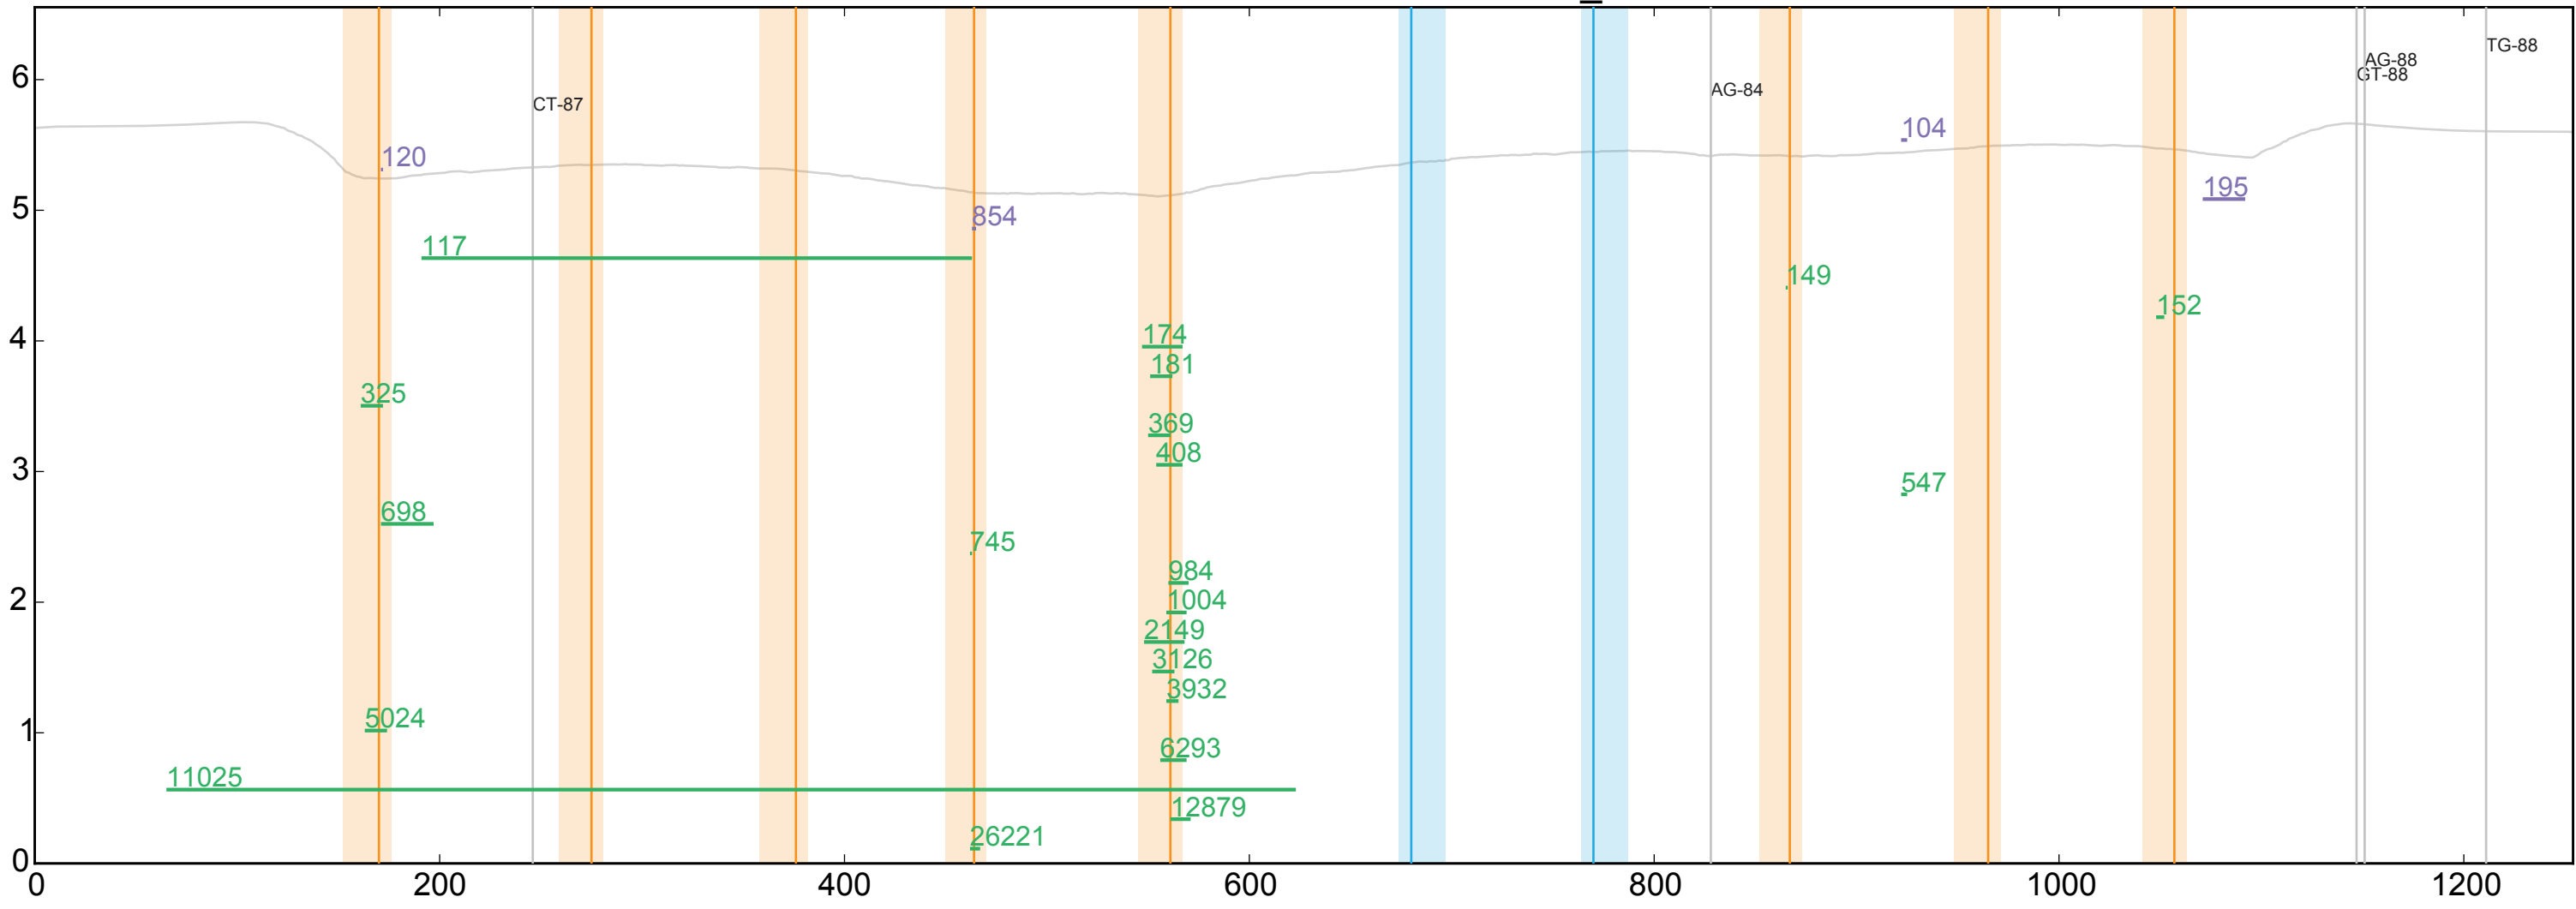

WT ENSDARG00000003469\_0

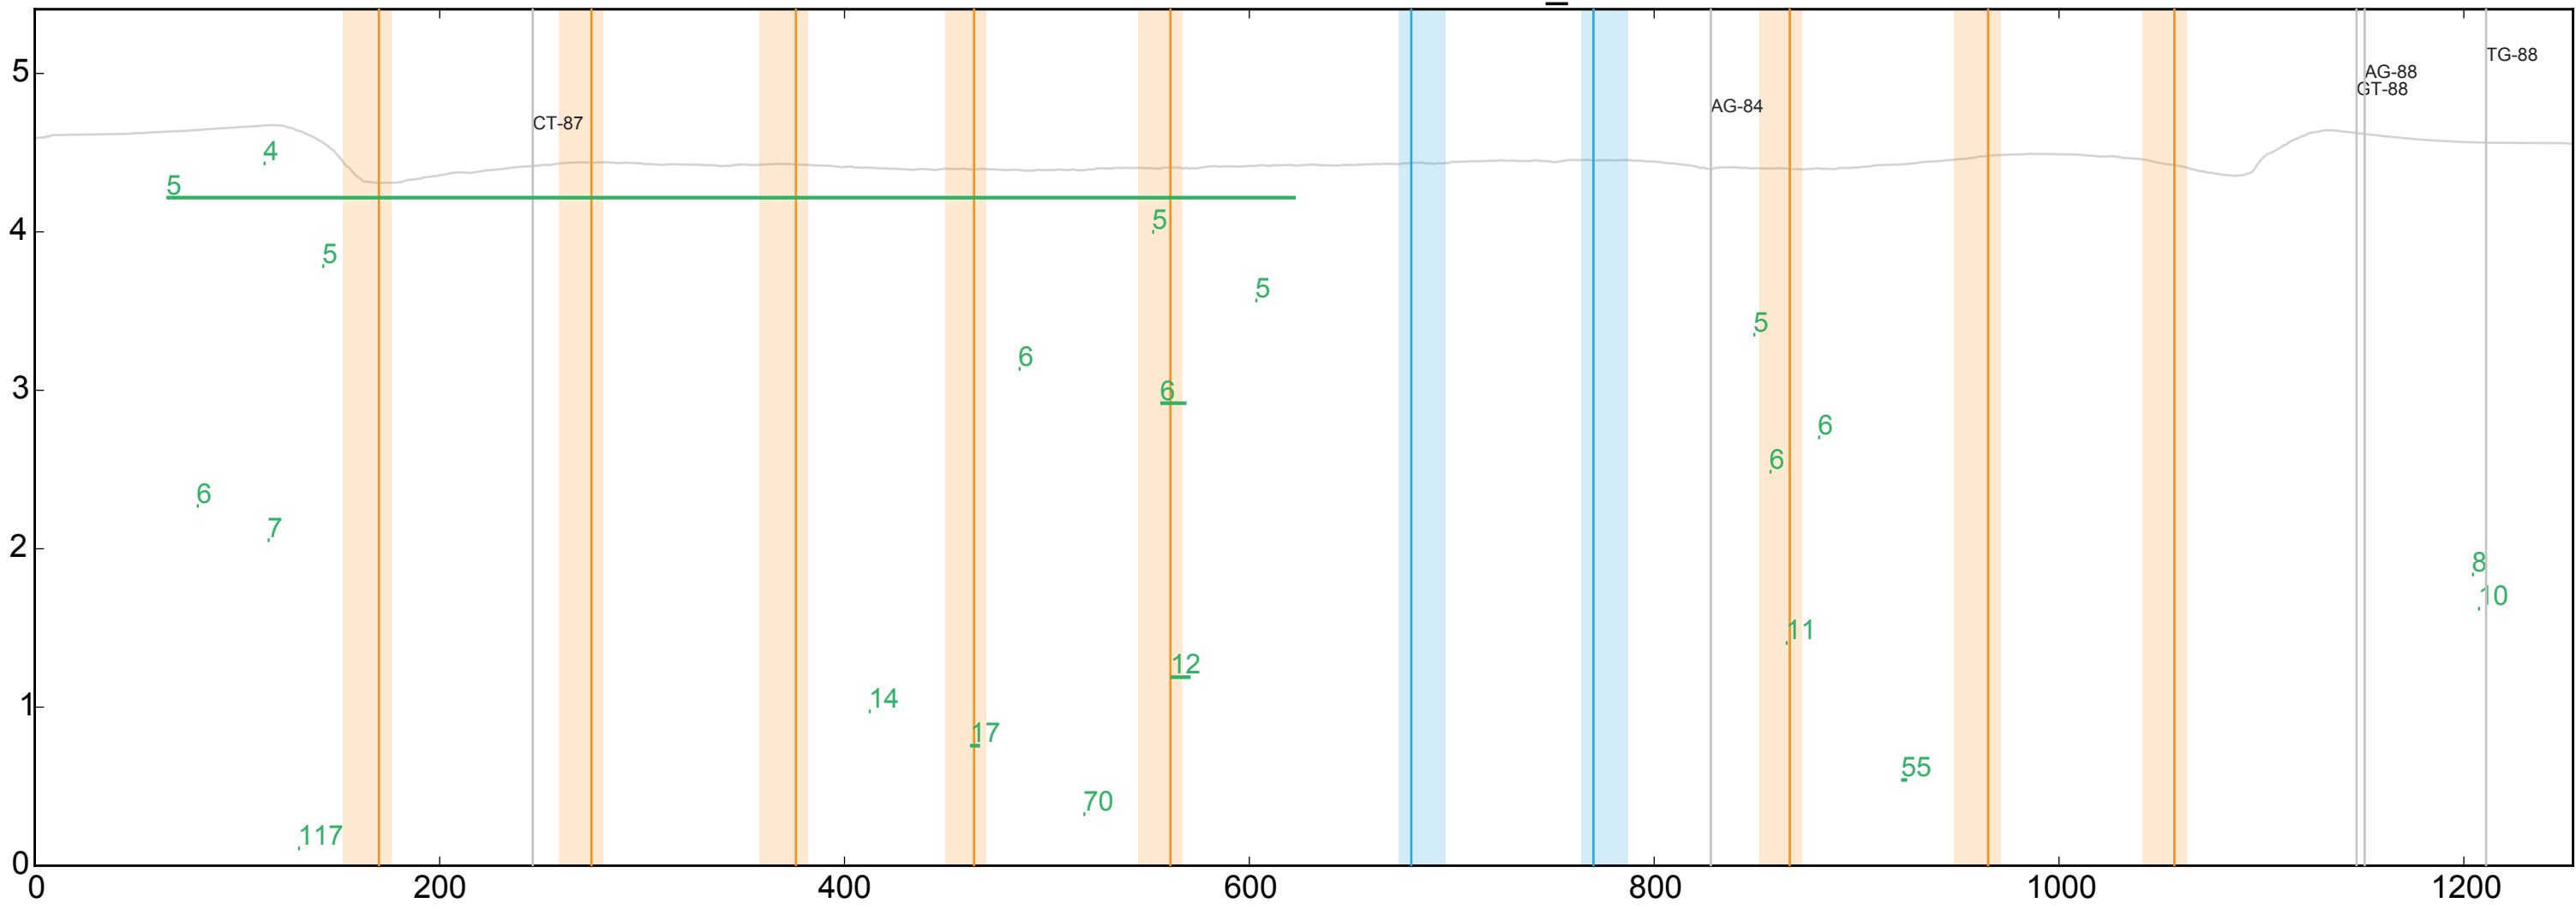

Mutant ENSDARG0000091127\_1

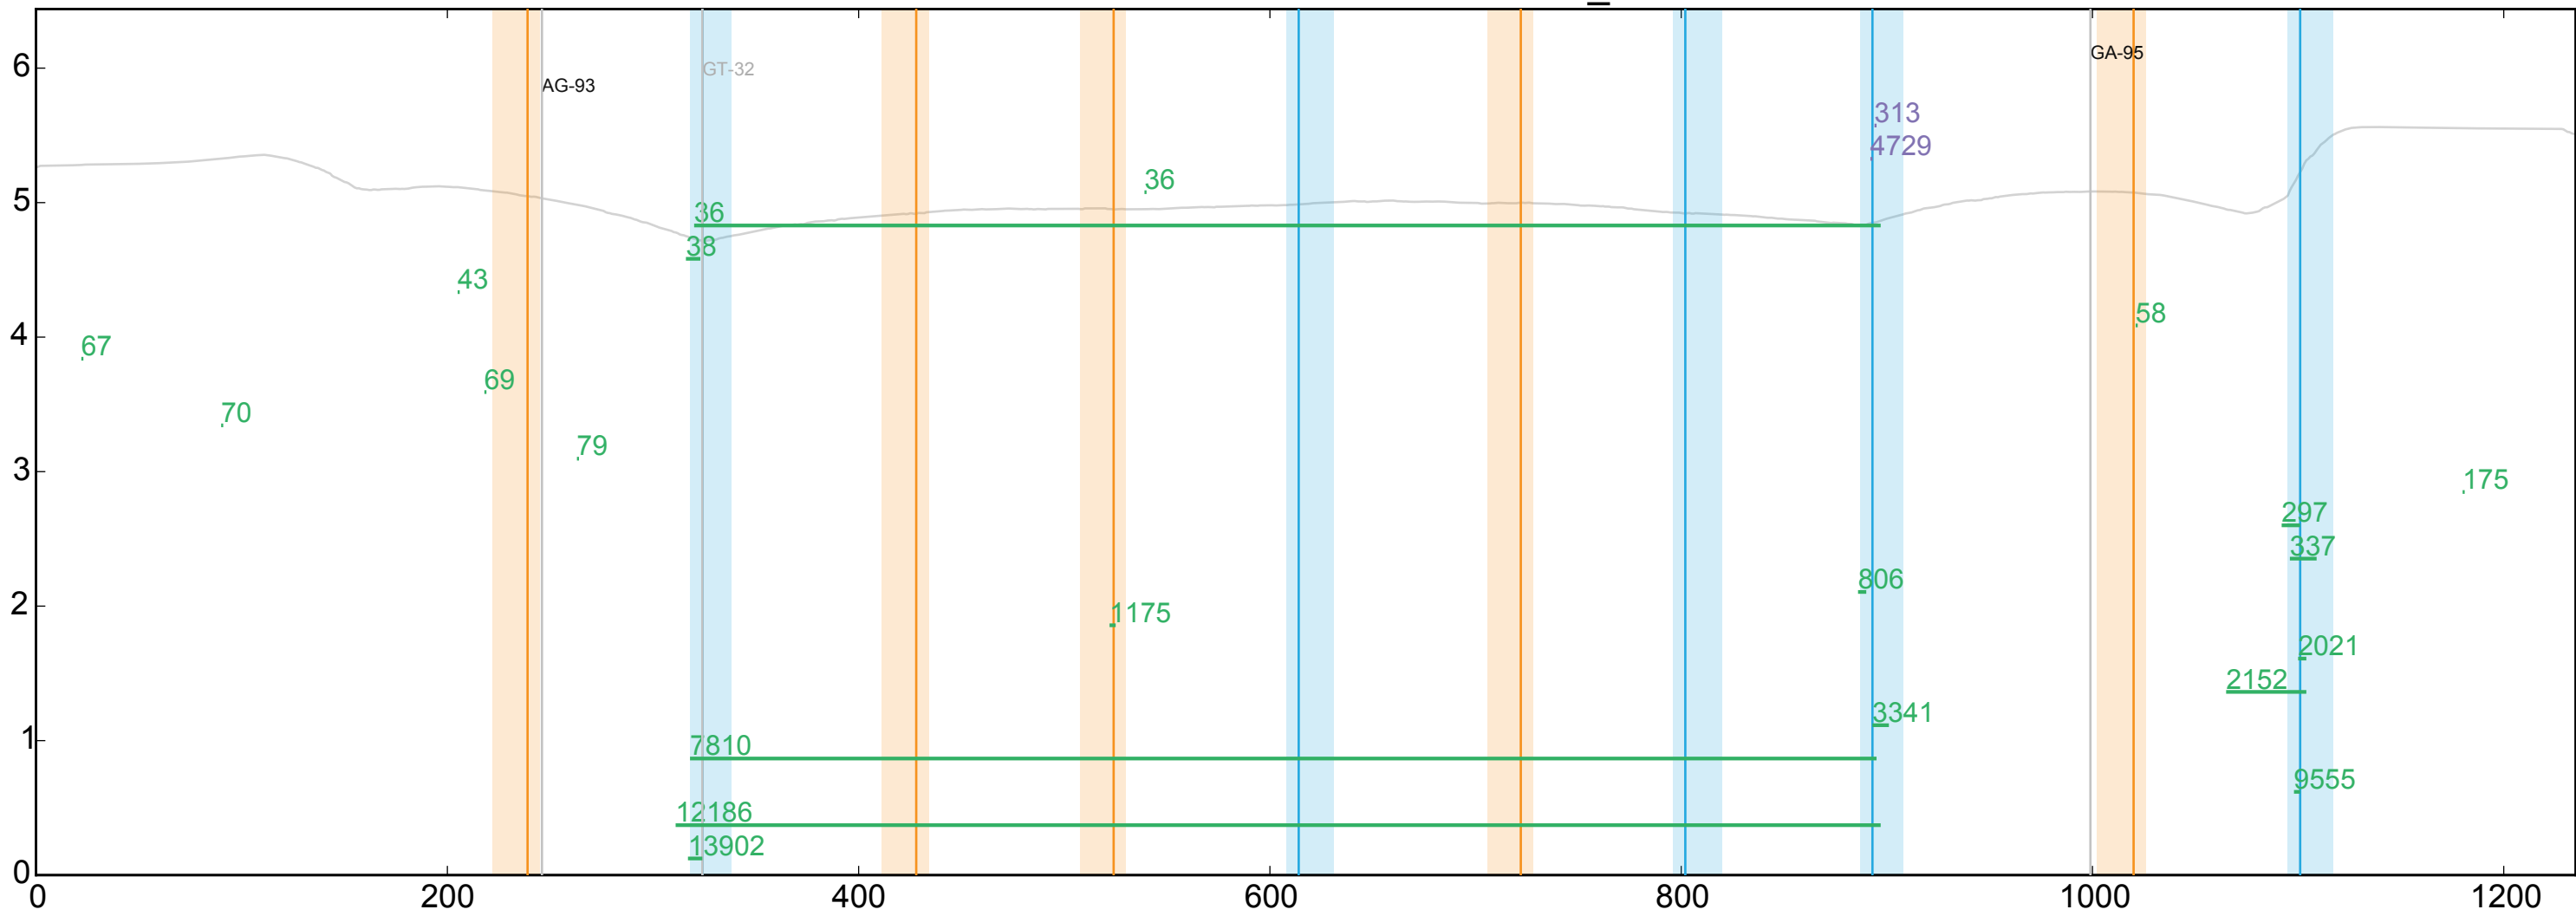

WT ENSDARG0000091127\_1

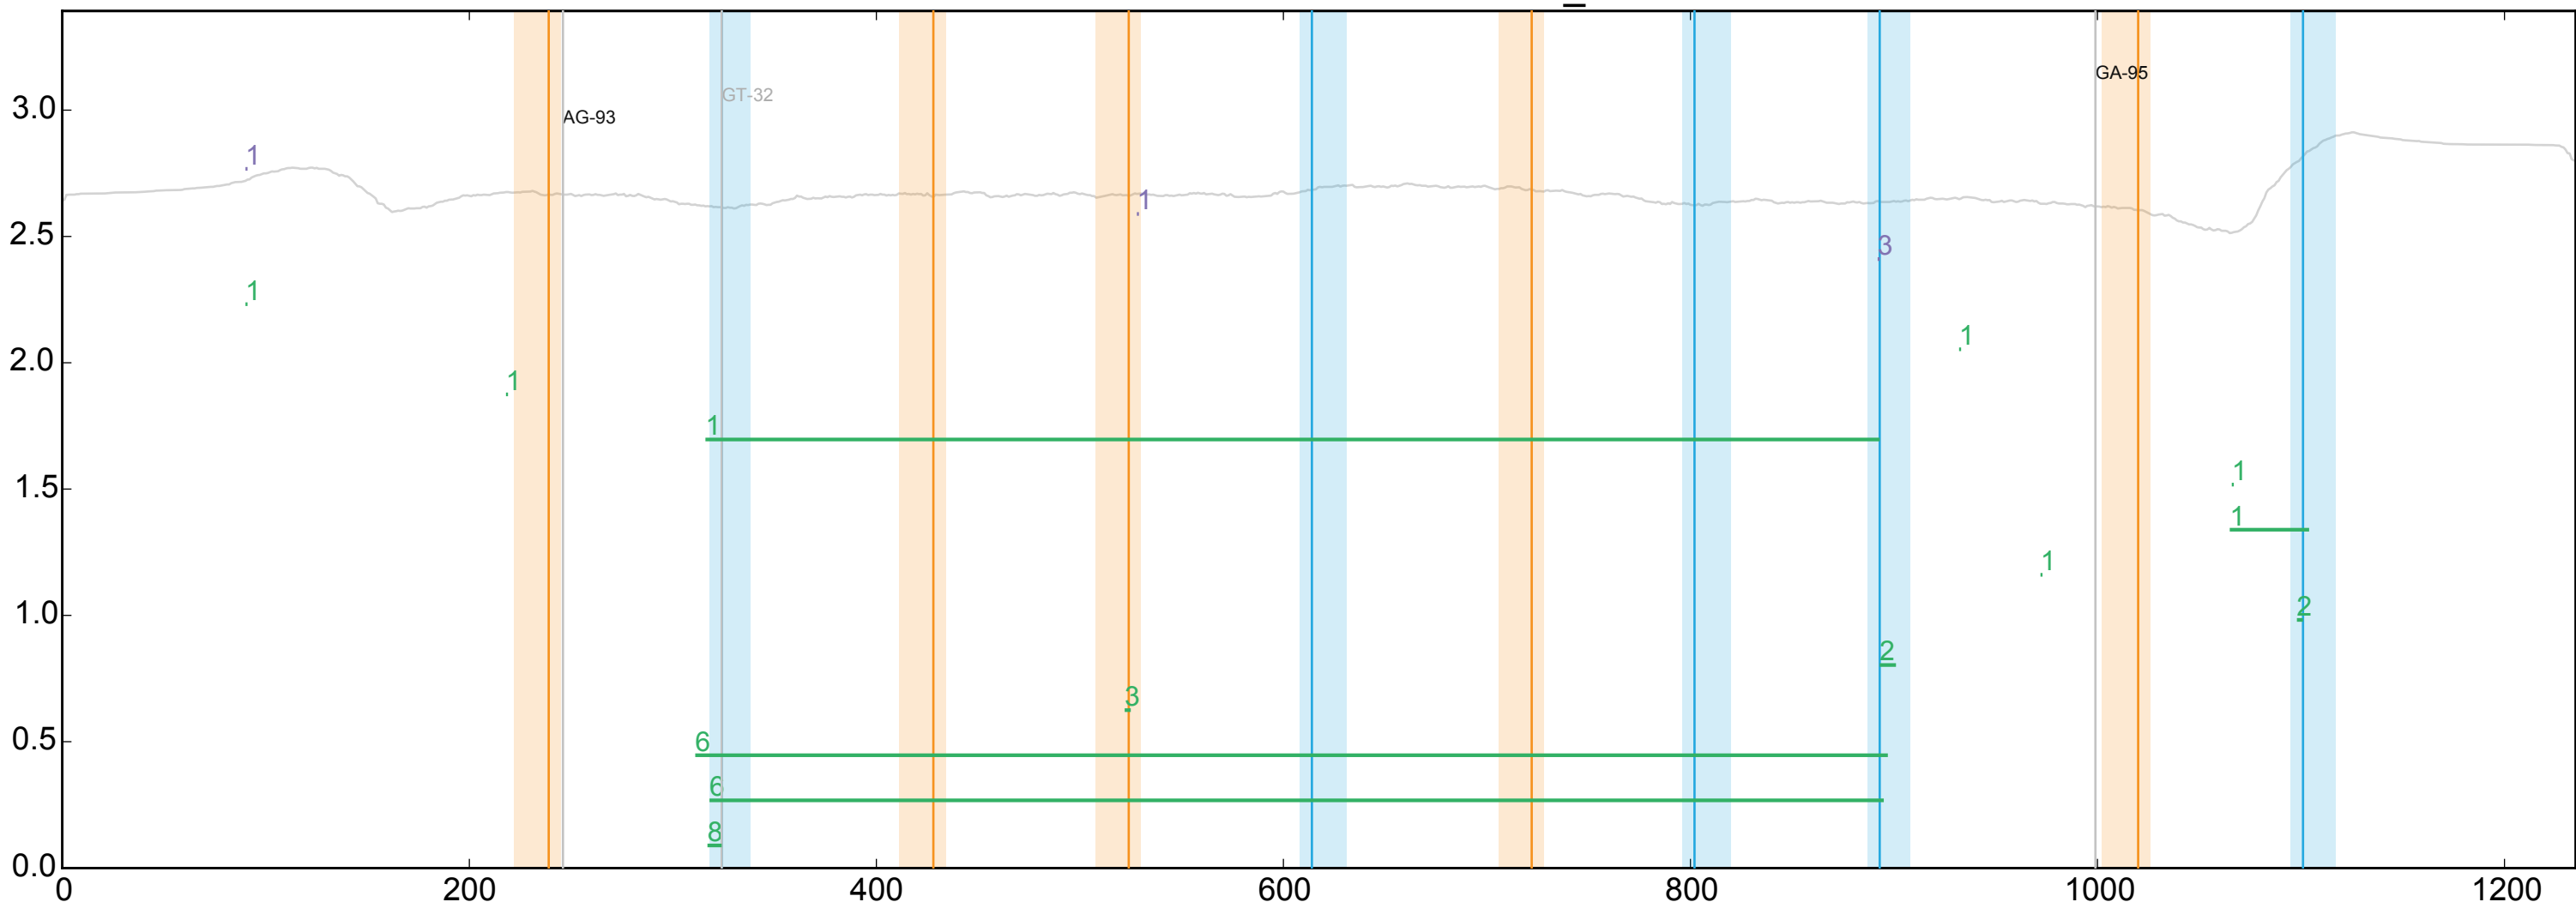

Mutant ENSDARG00000079738\_5

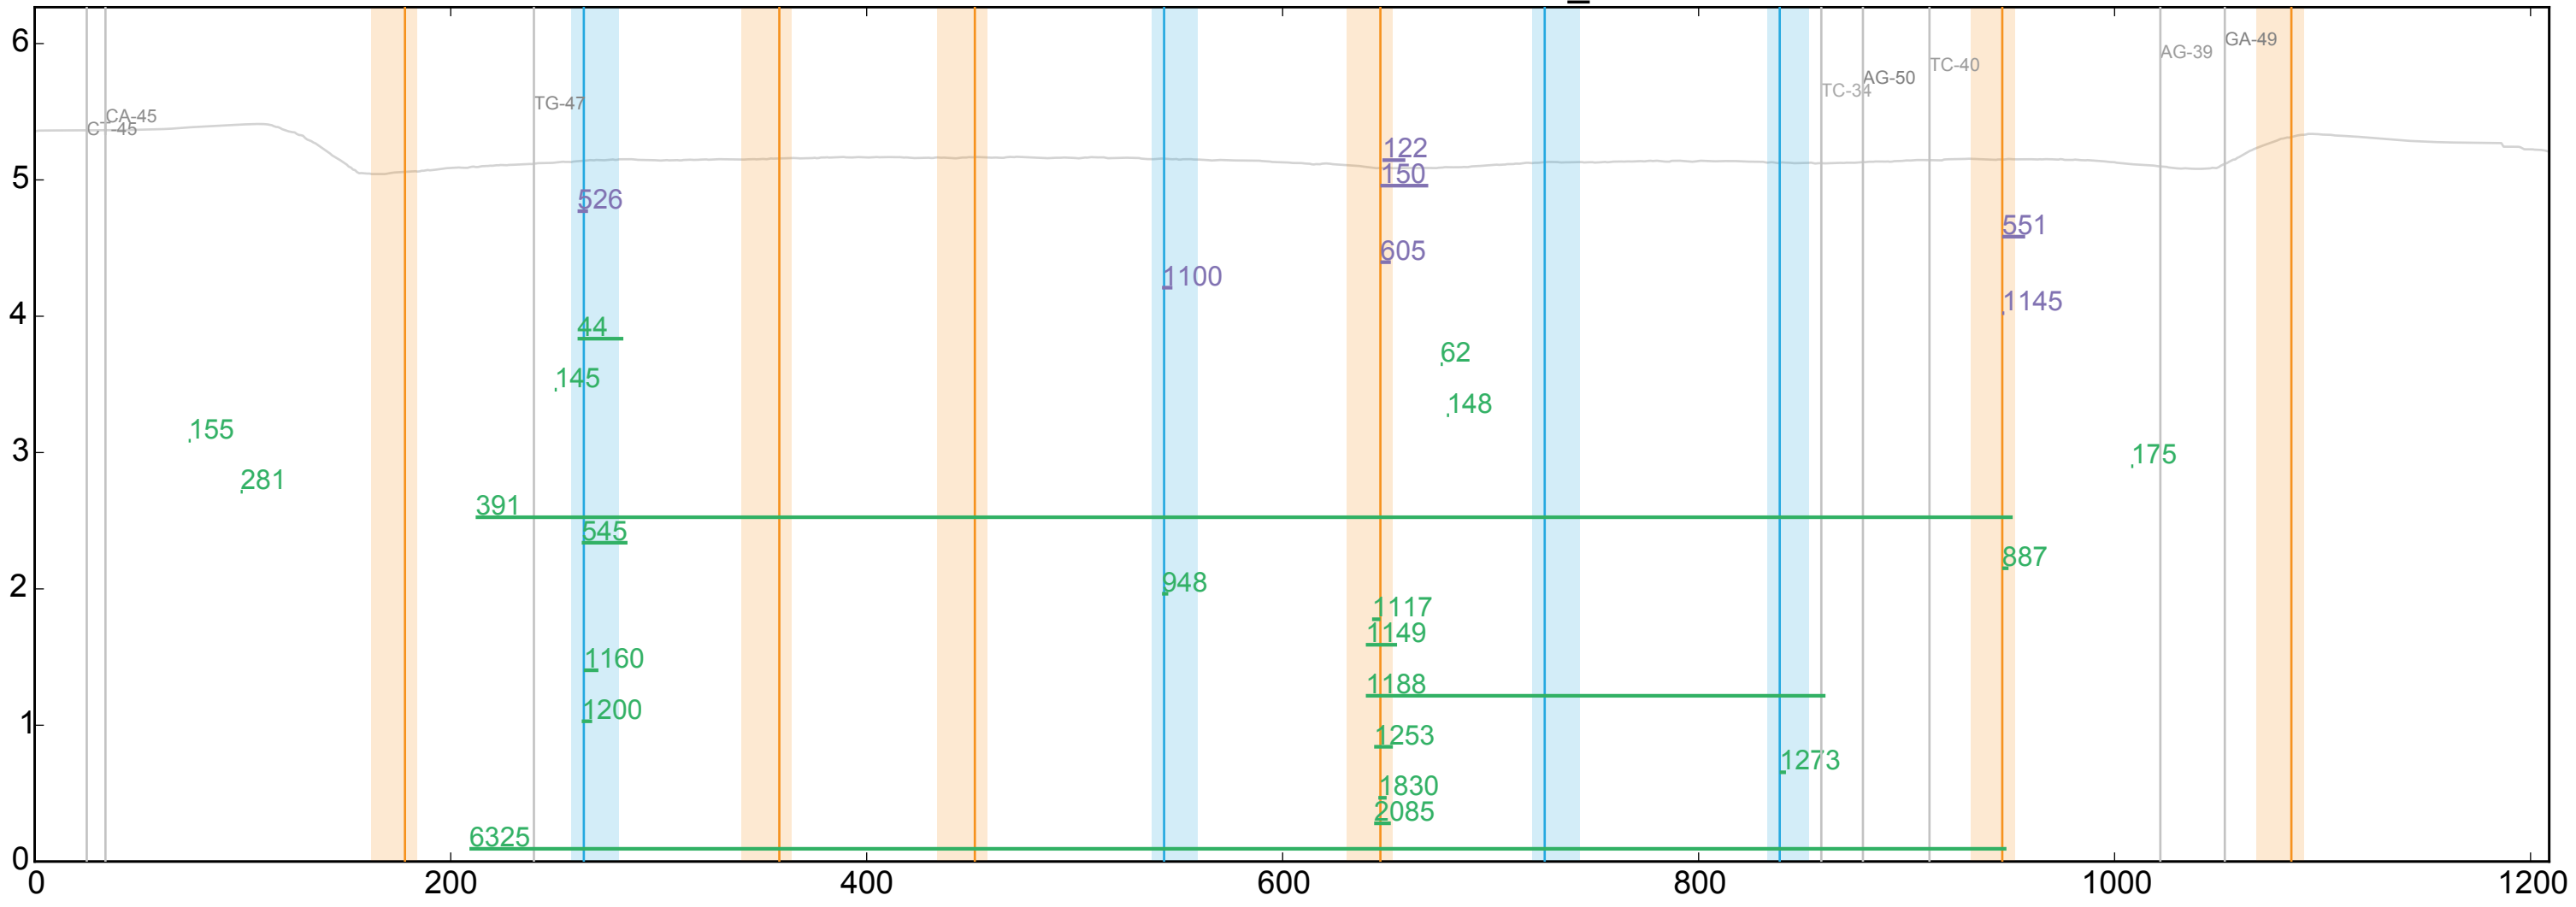

WT ENSDARG00000079738\_5

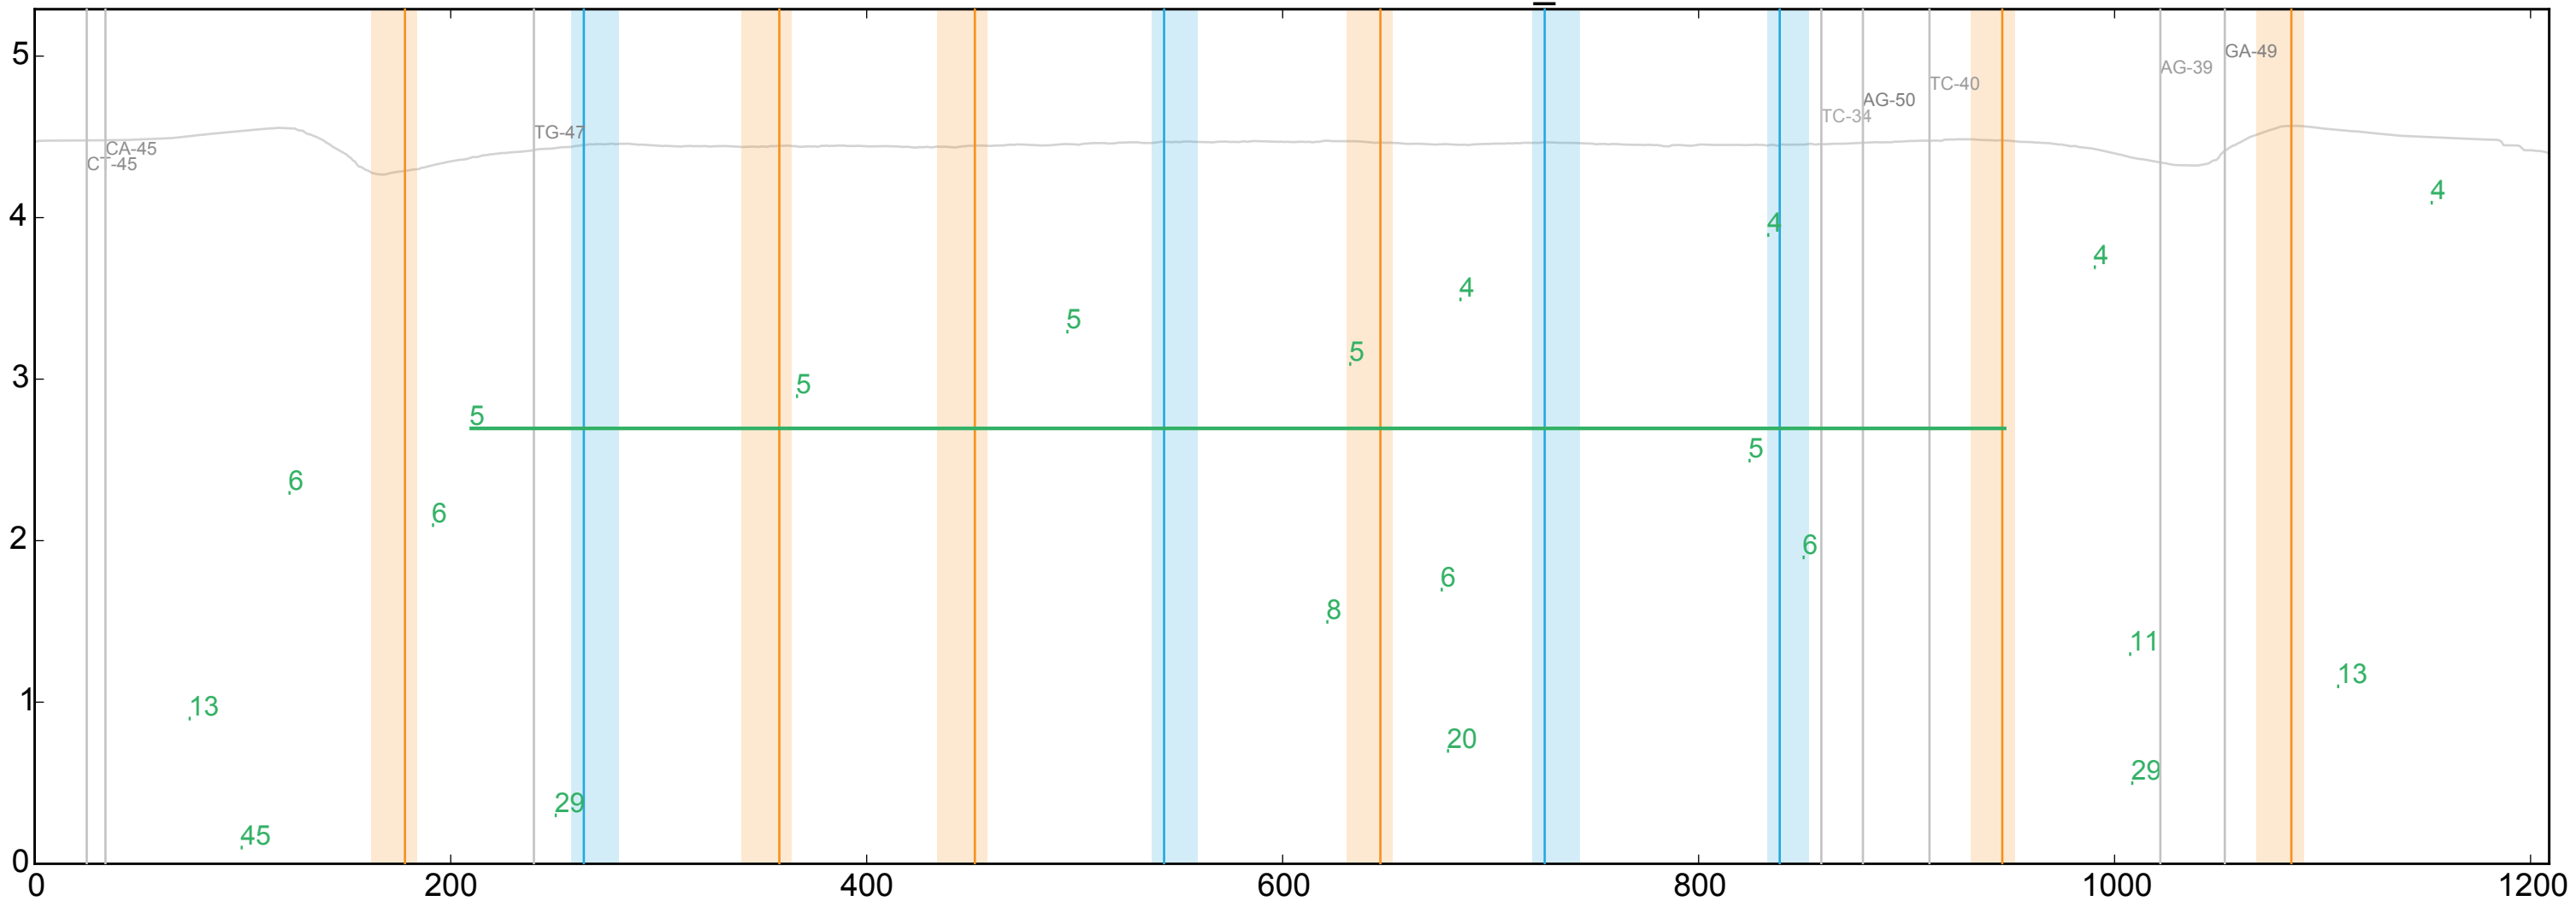

Mutant ENSDARG00000077293\_7

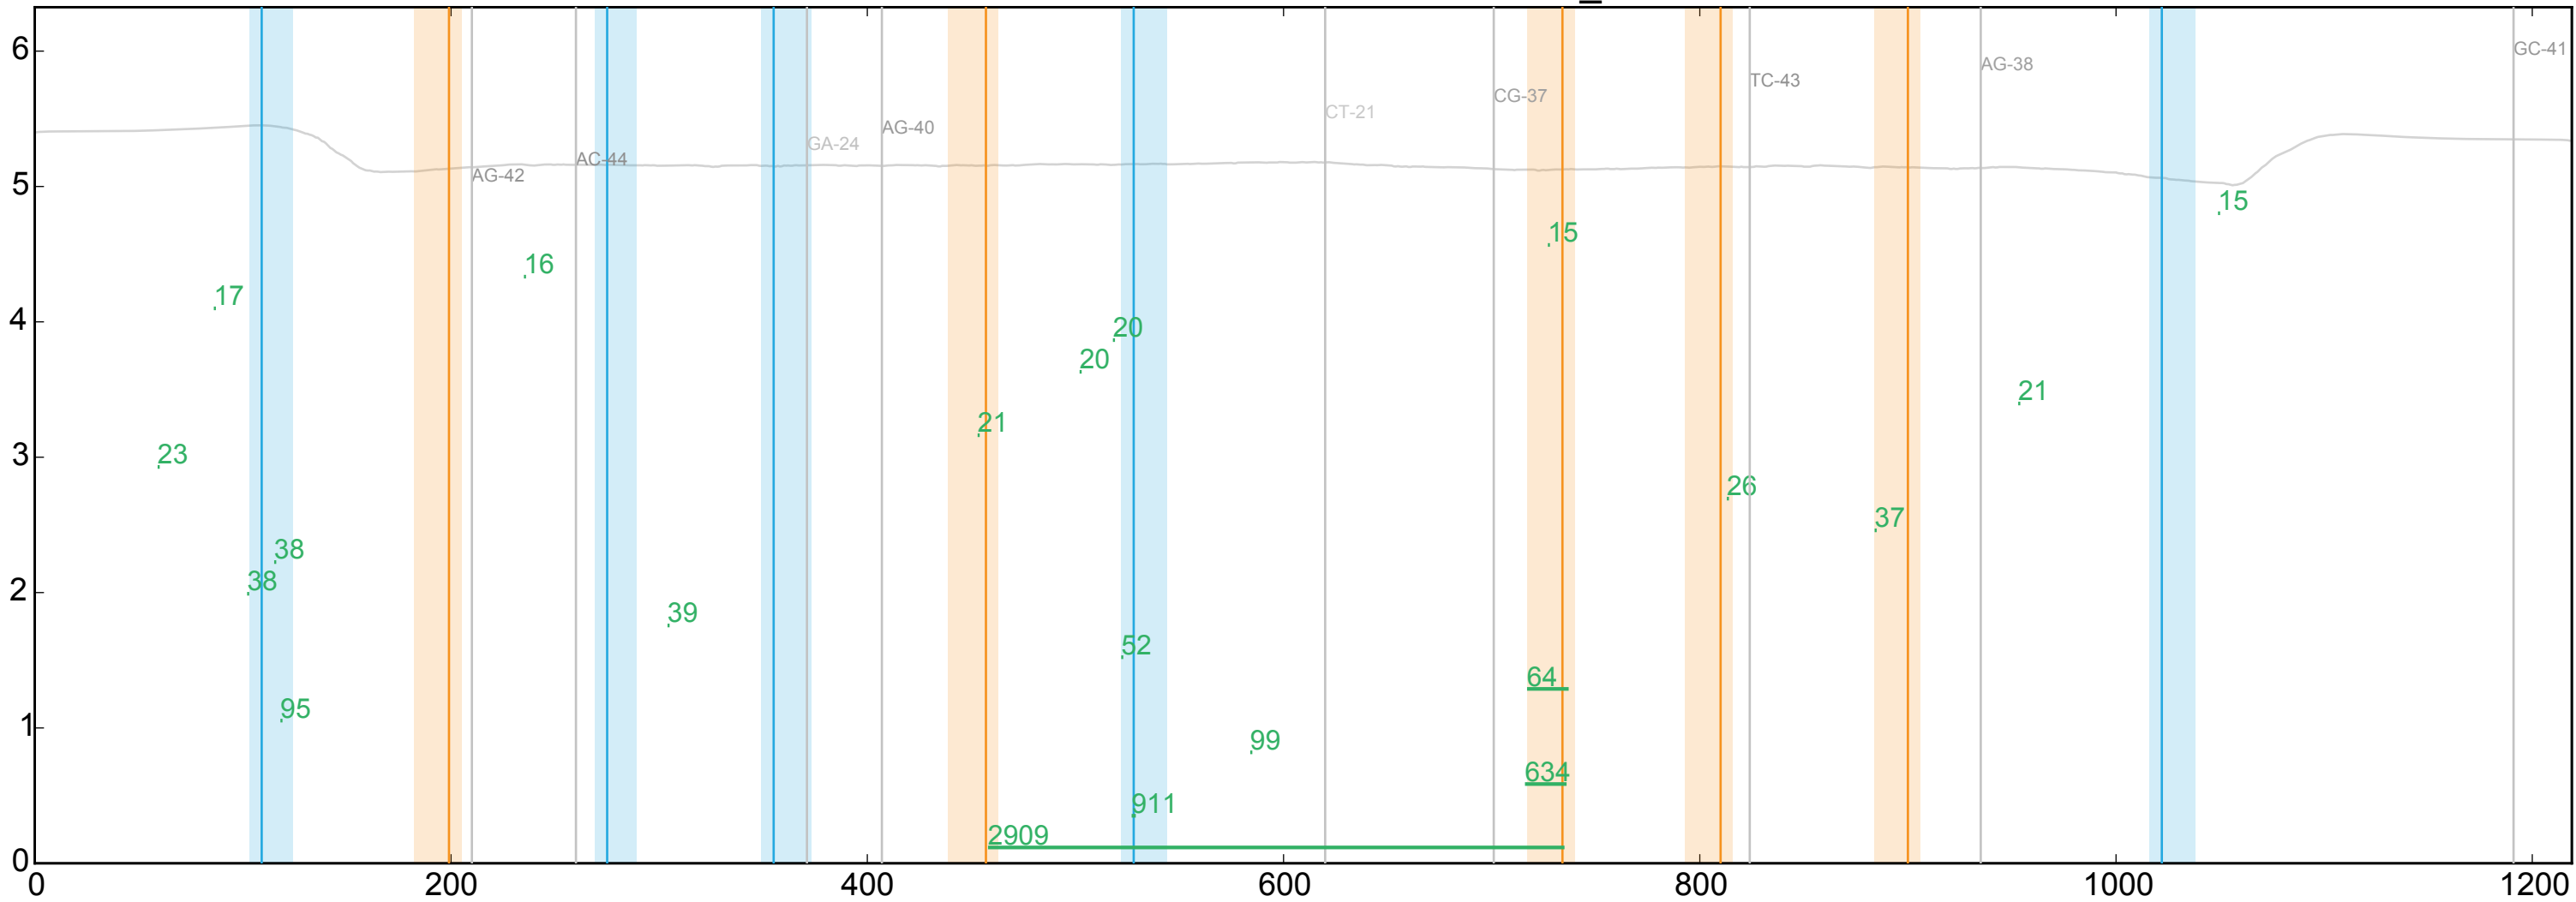

WT ENSDARG00000077293\_7

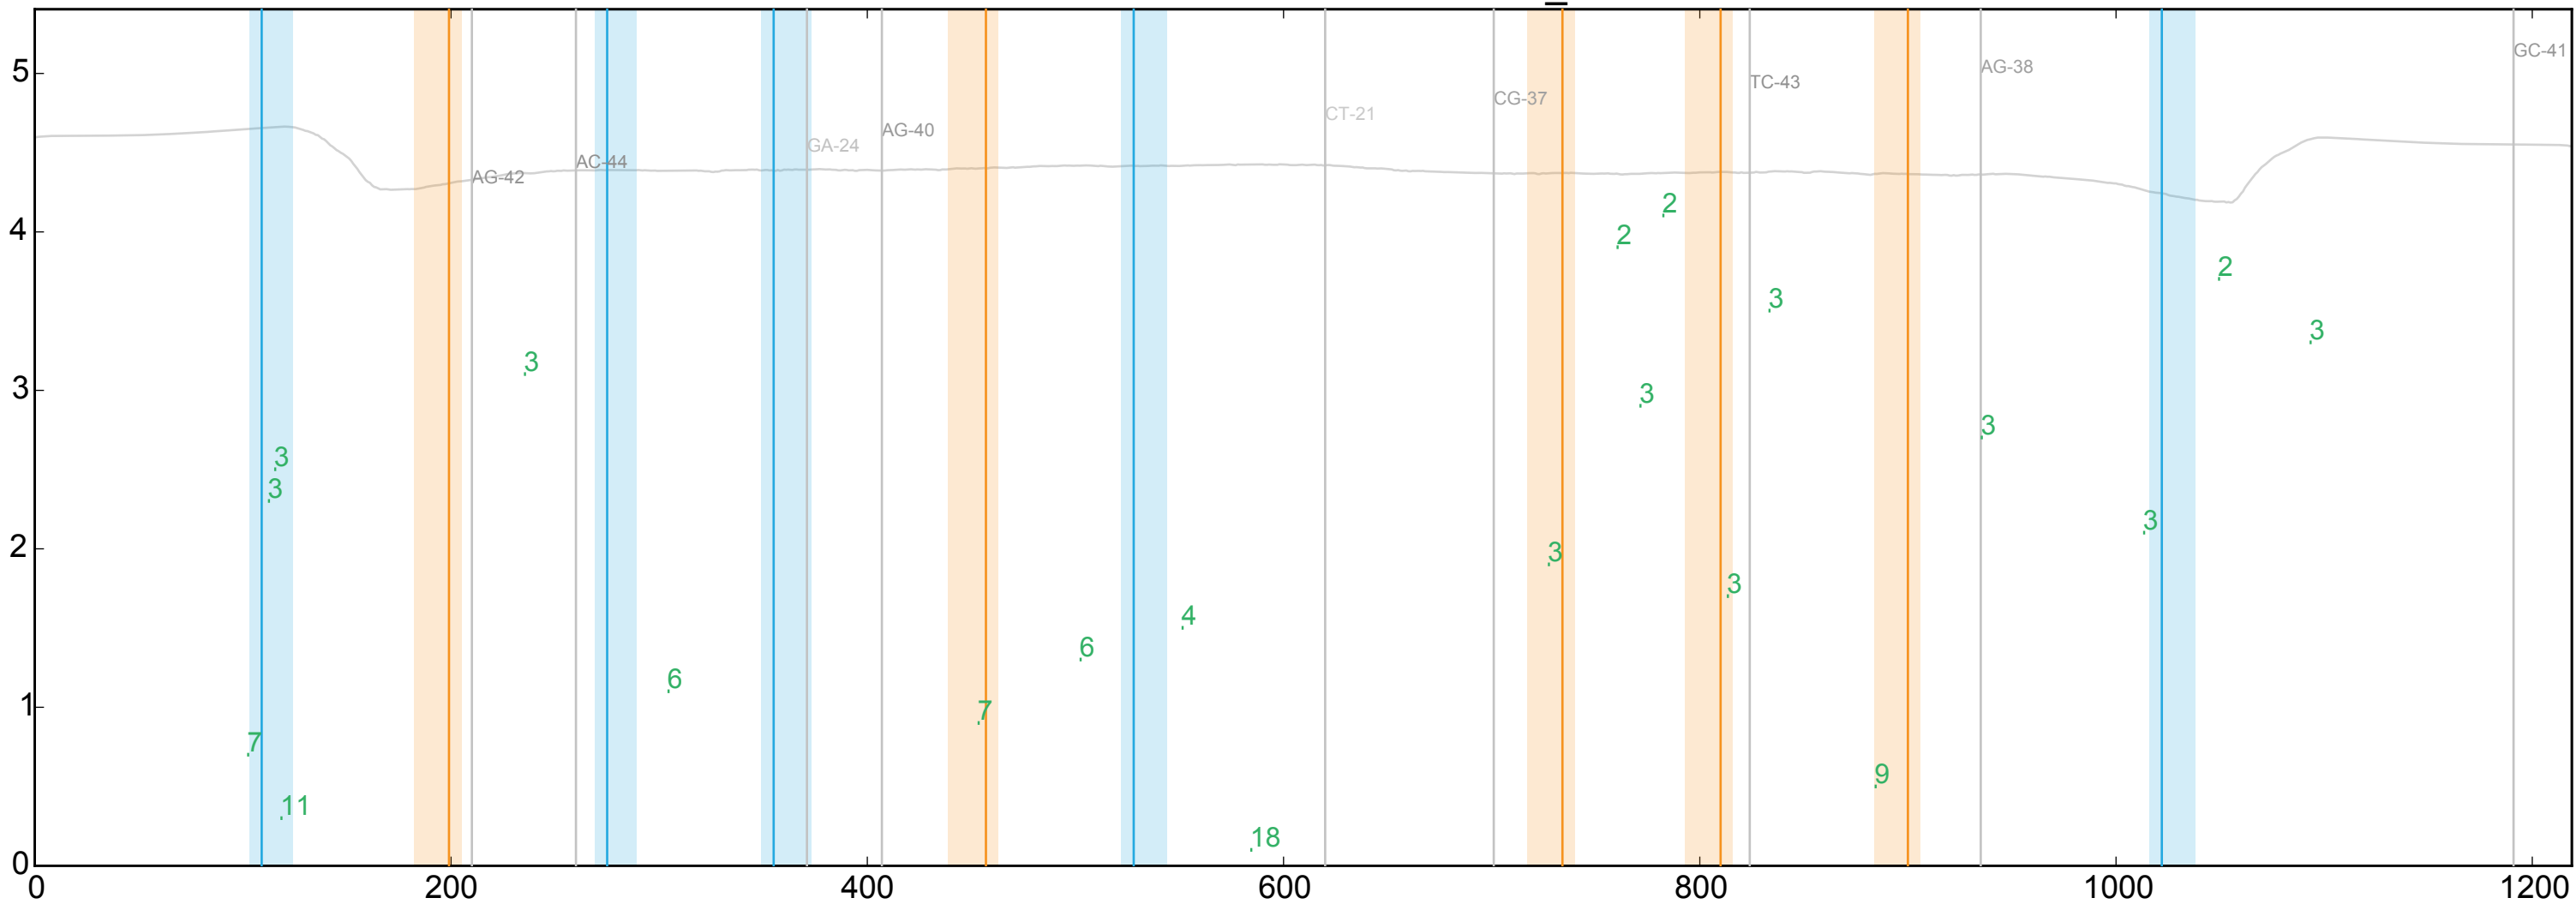

Mutant ENSDARG00000057792\_1

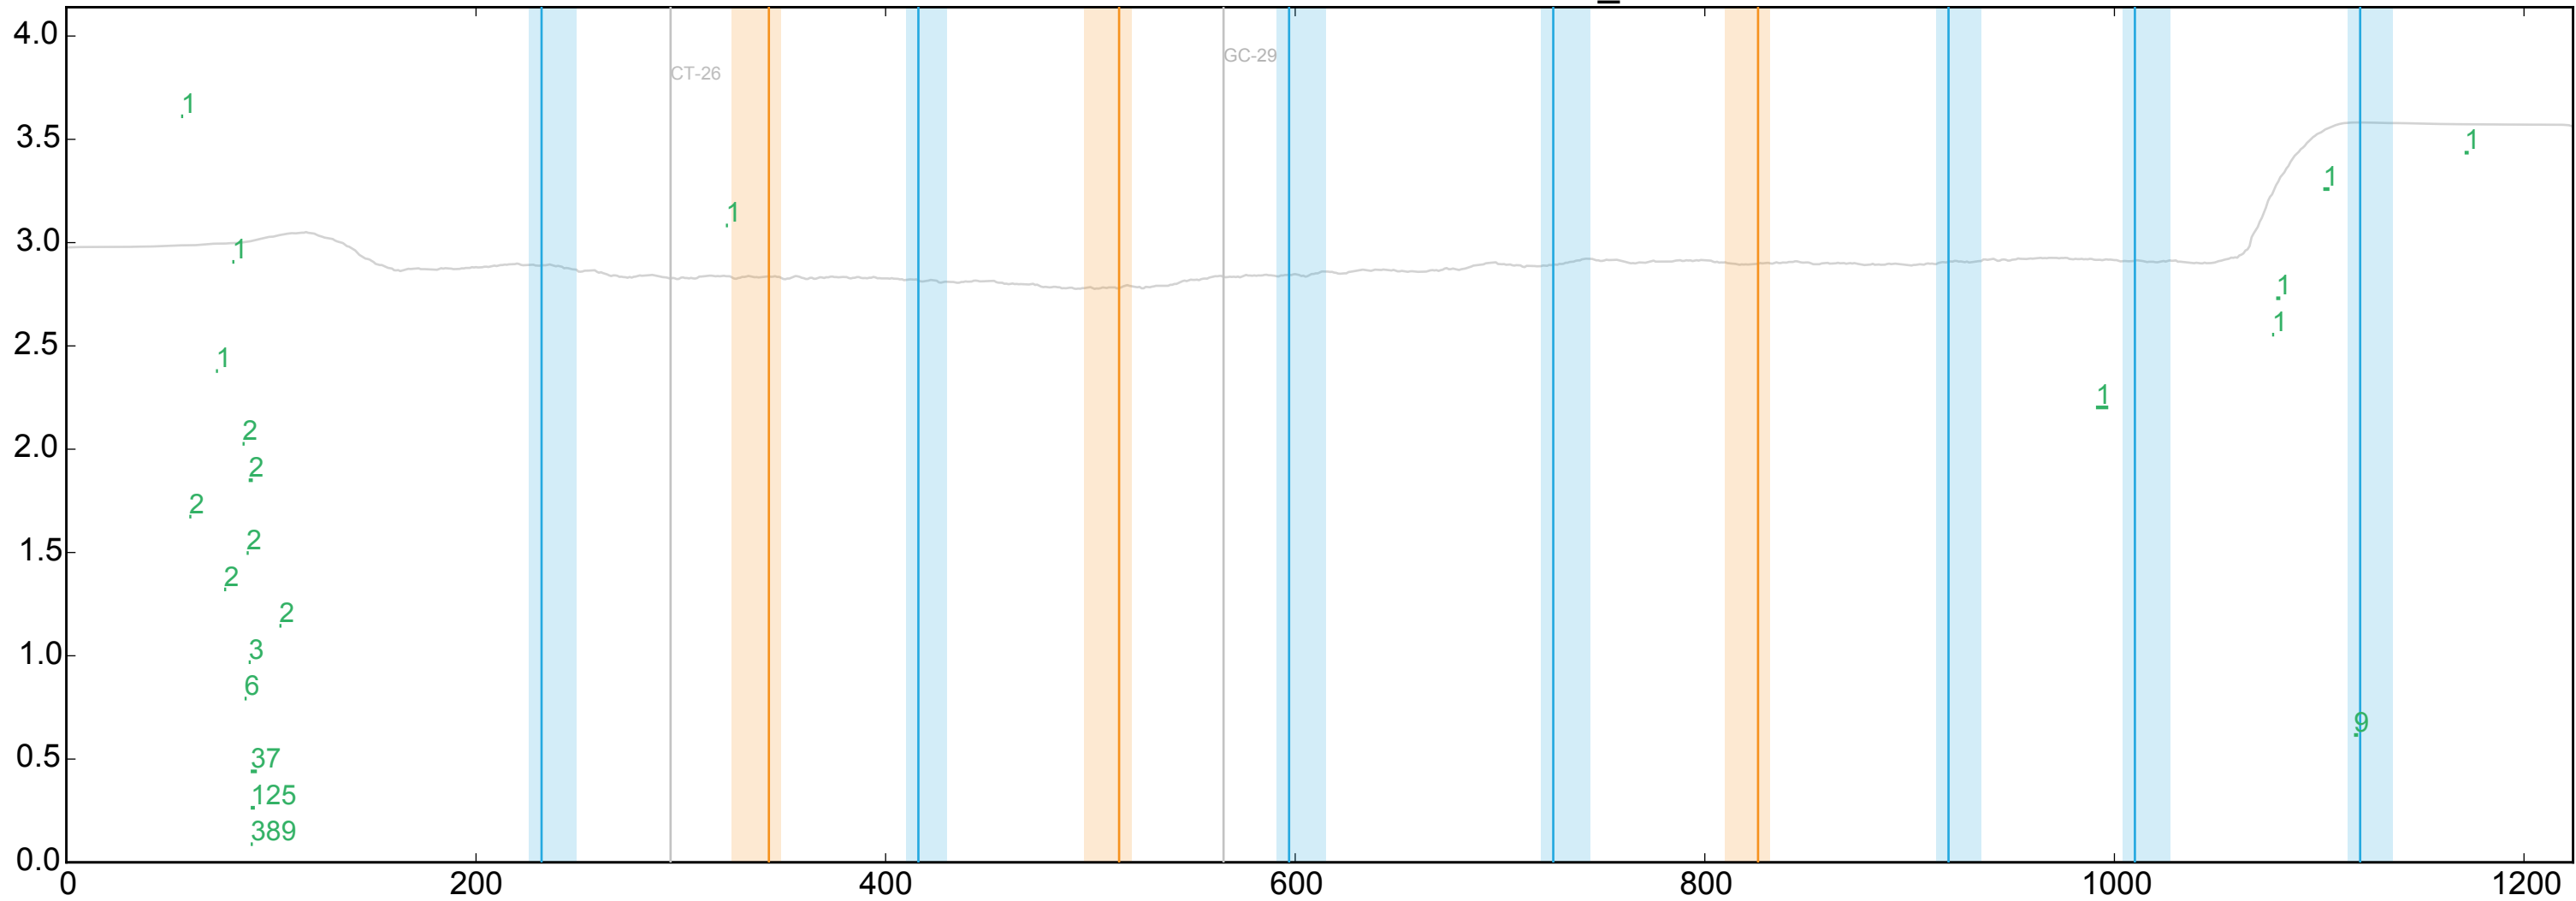

WT ENSDARG00000057792\_1

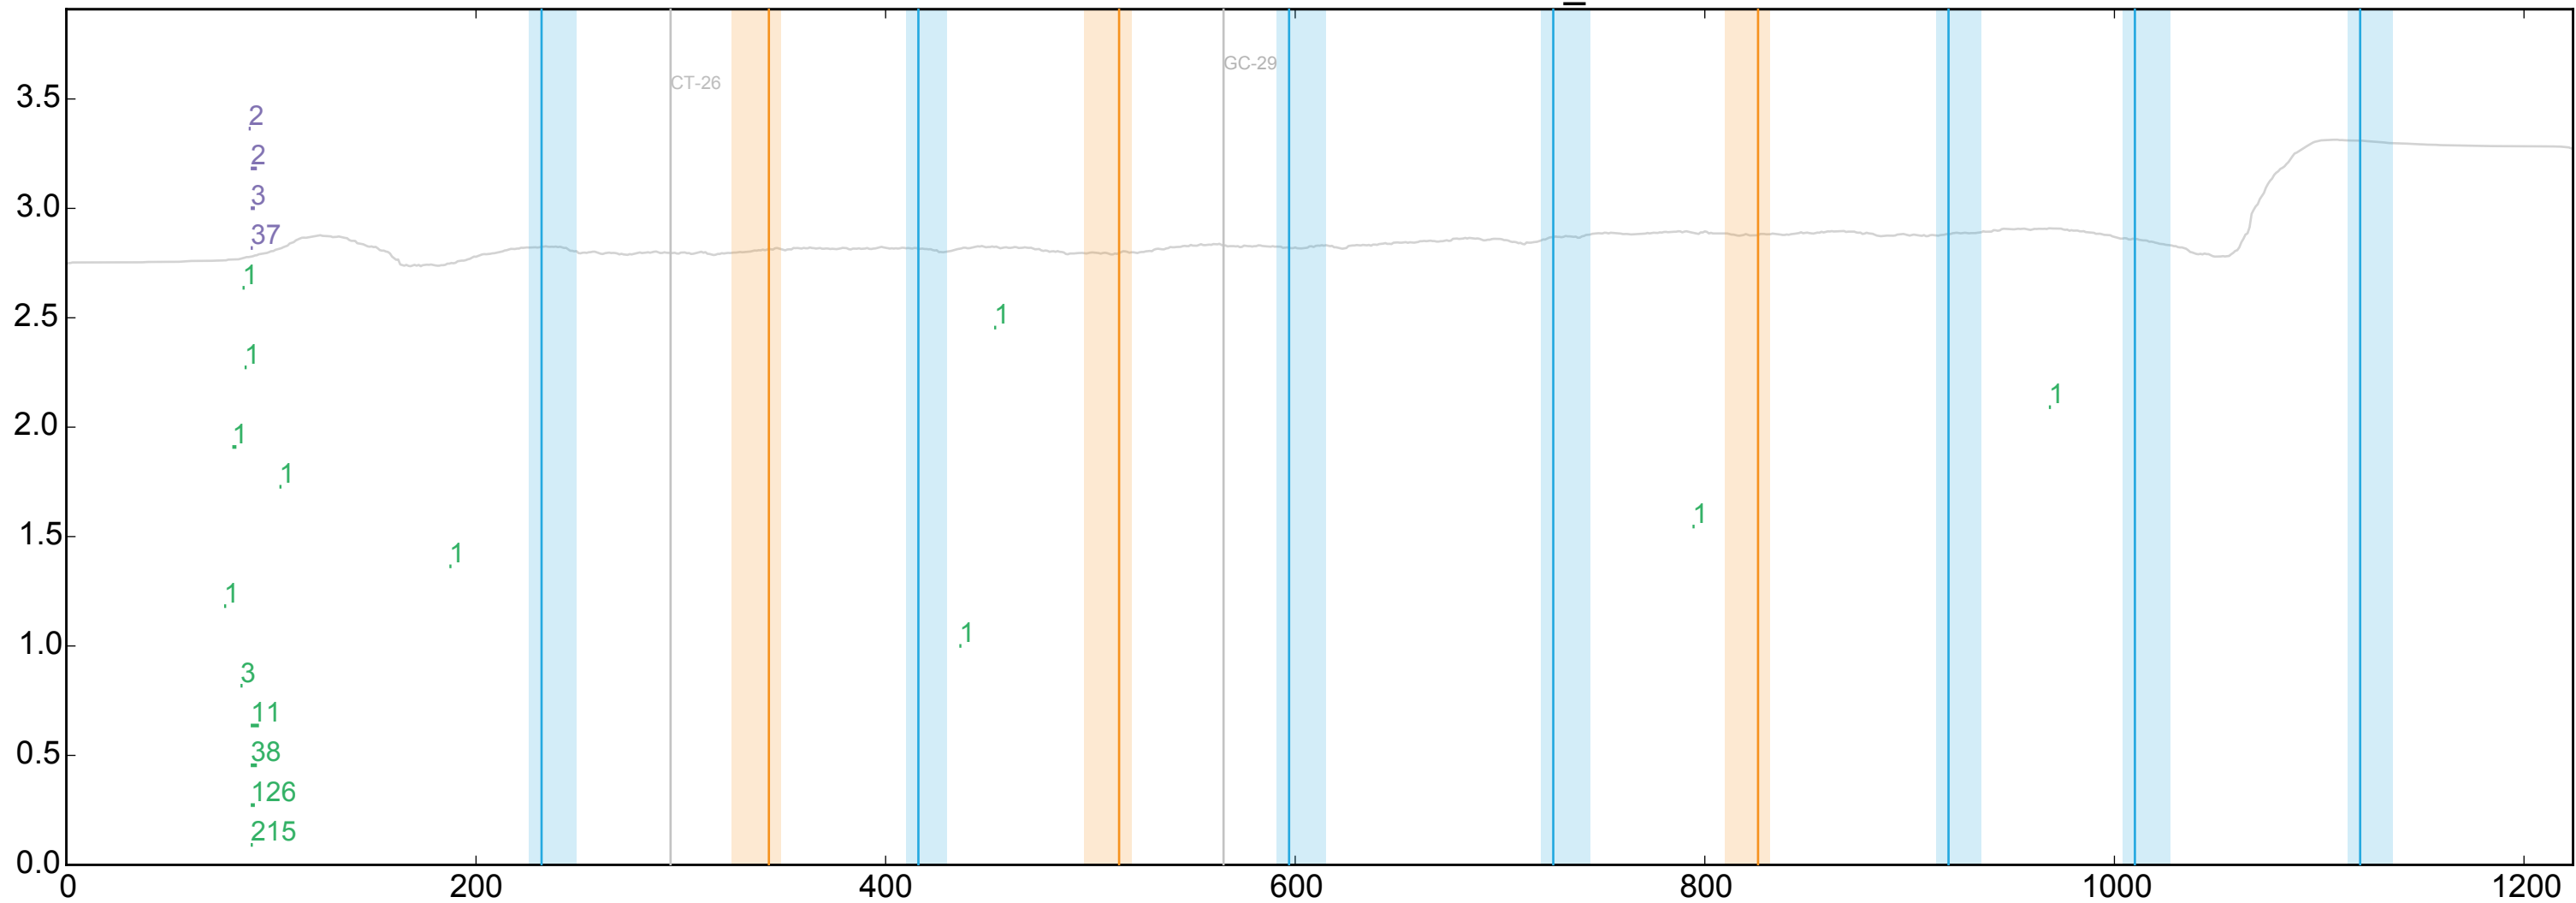



Mutant ENSDARG00000015222\_0

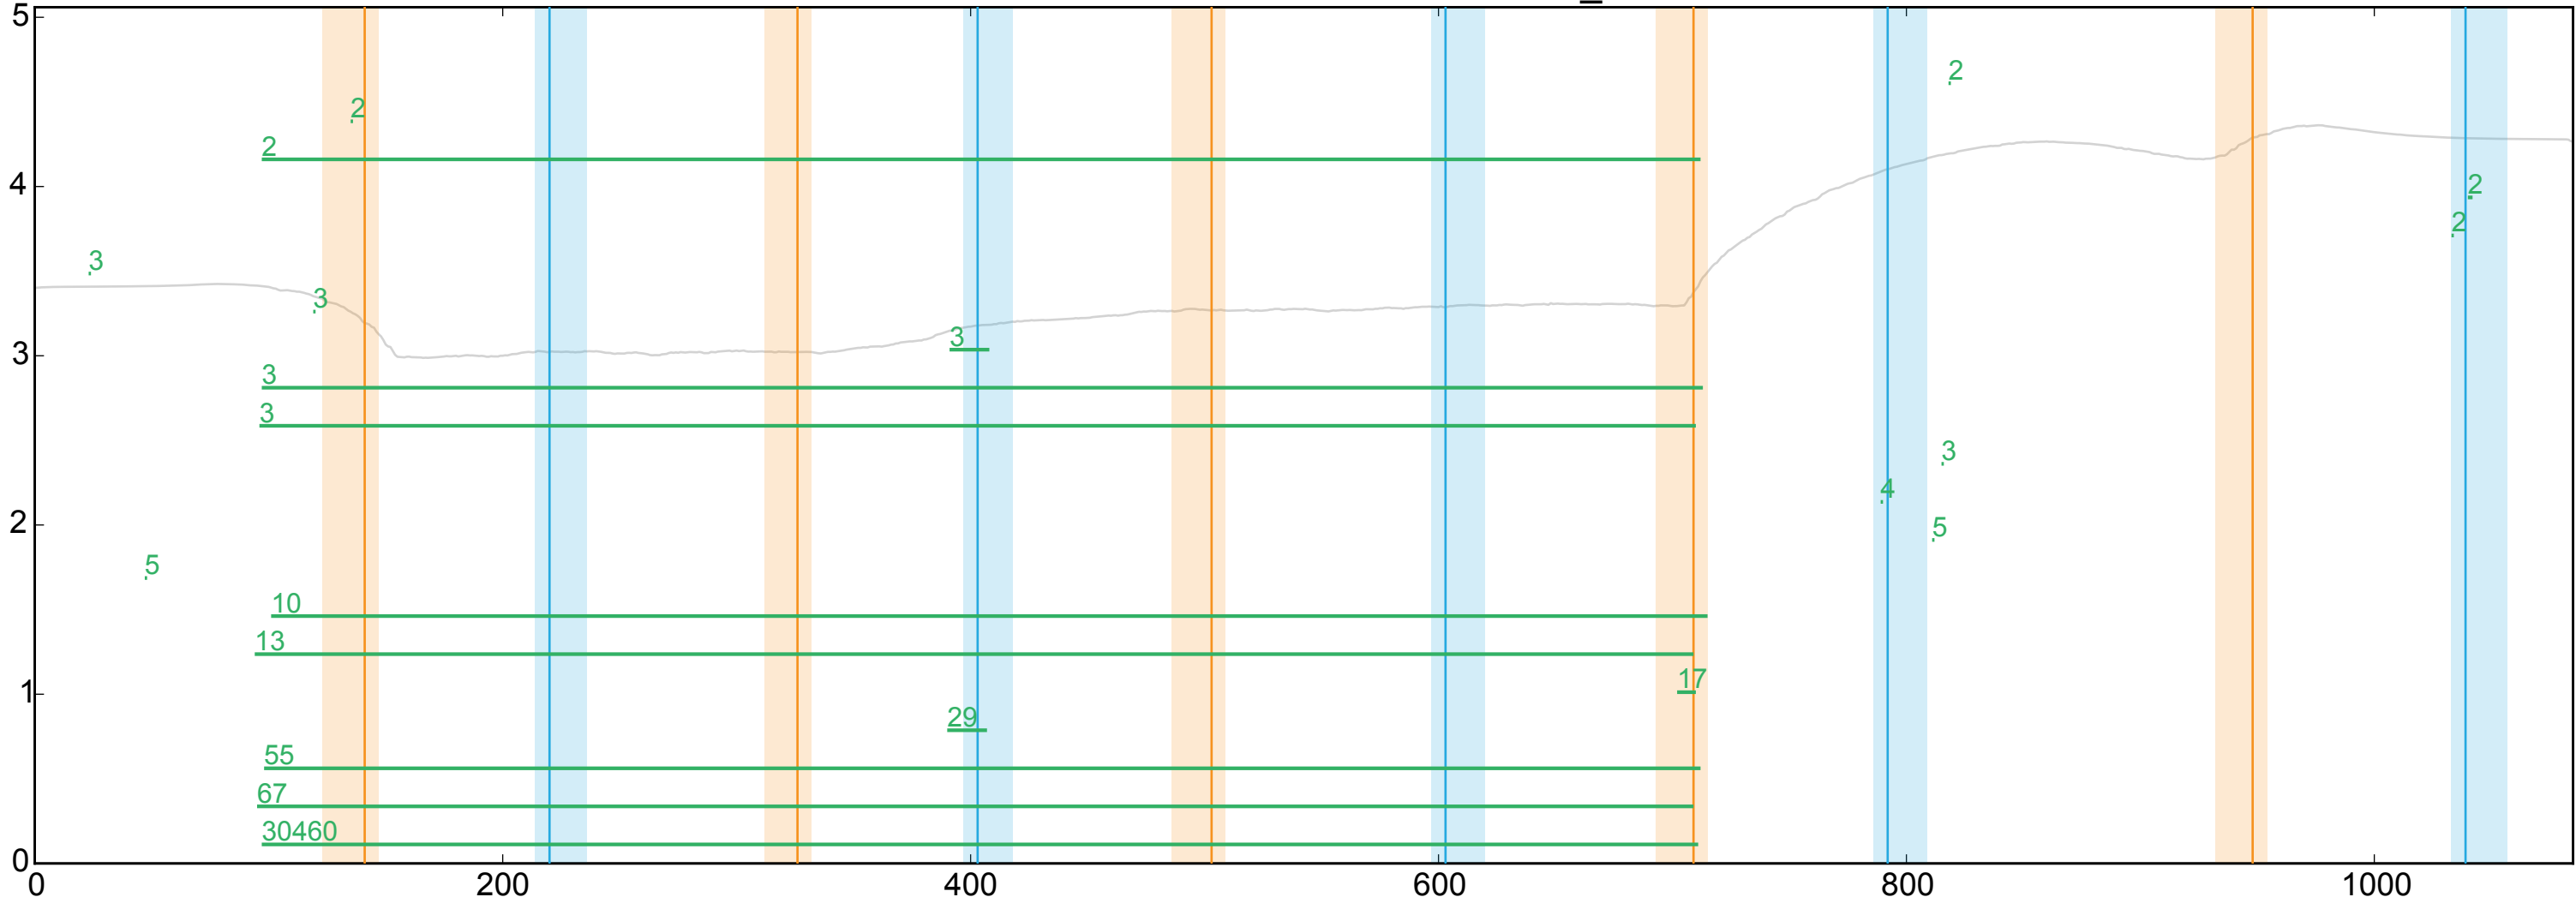

WT ENSDARG00000015222\_0

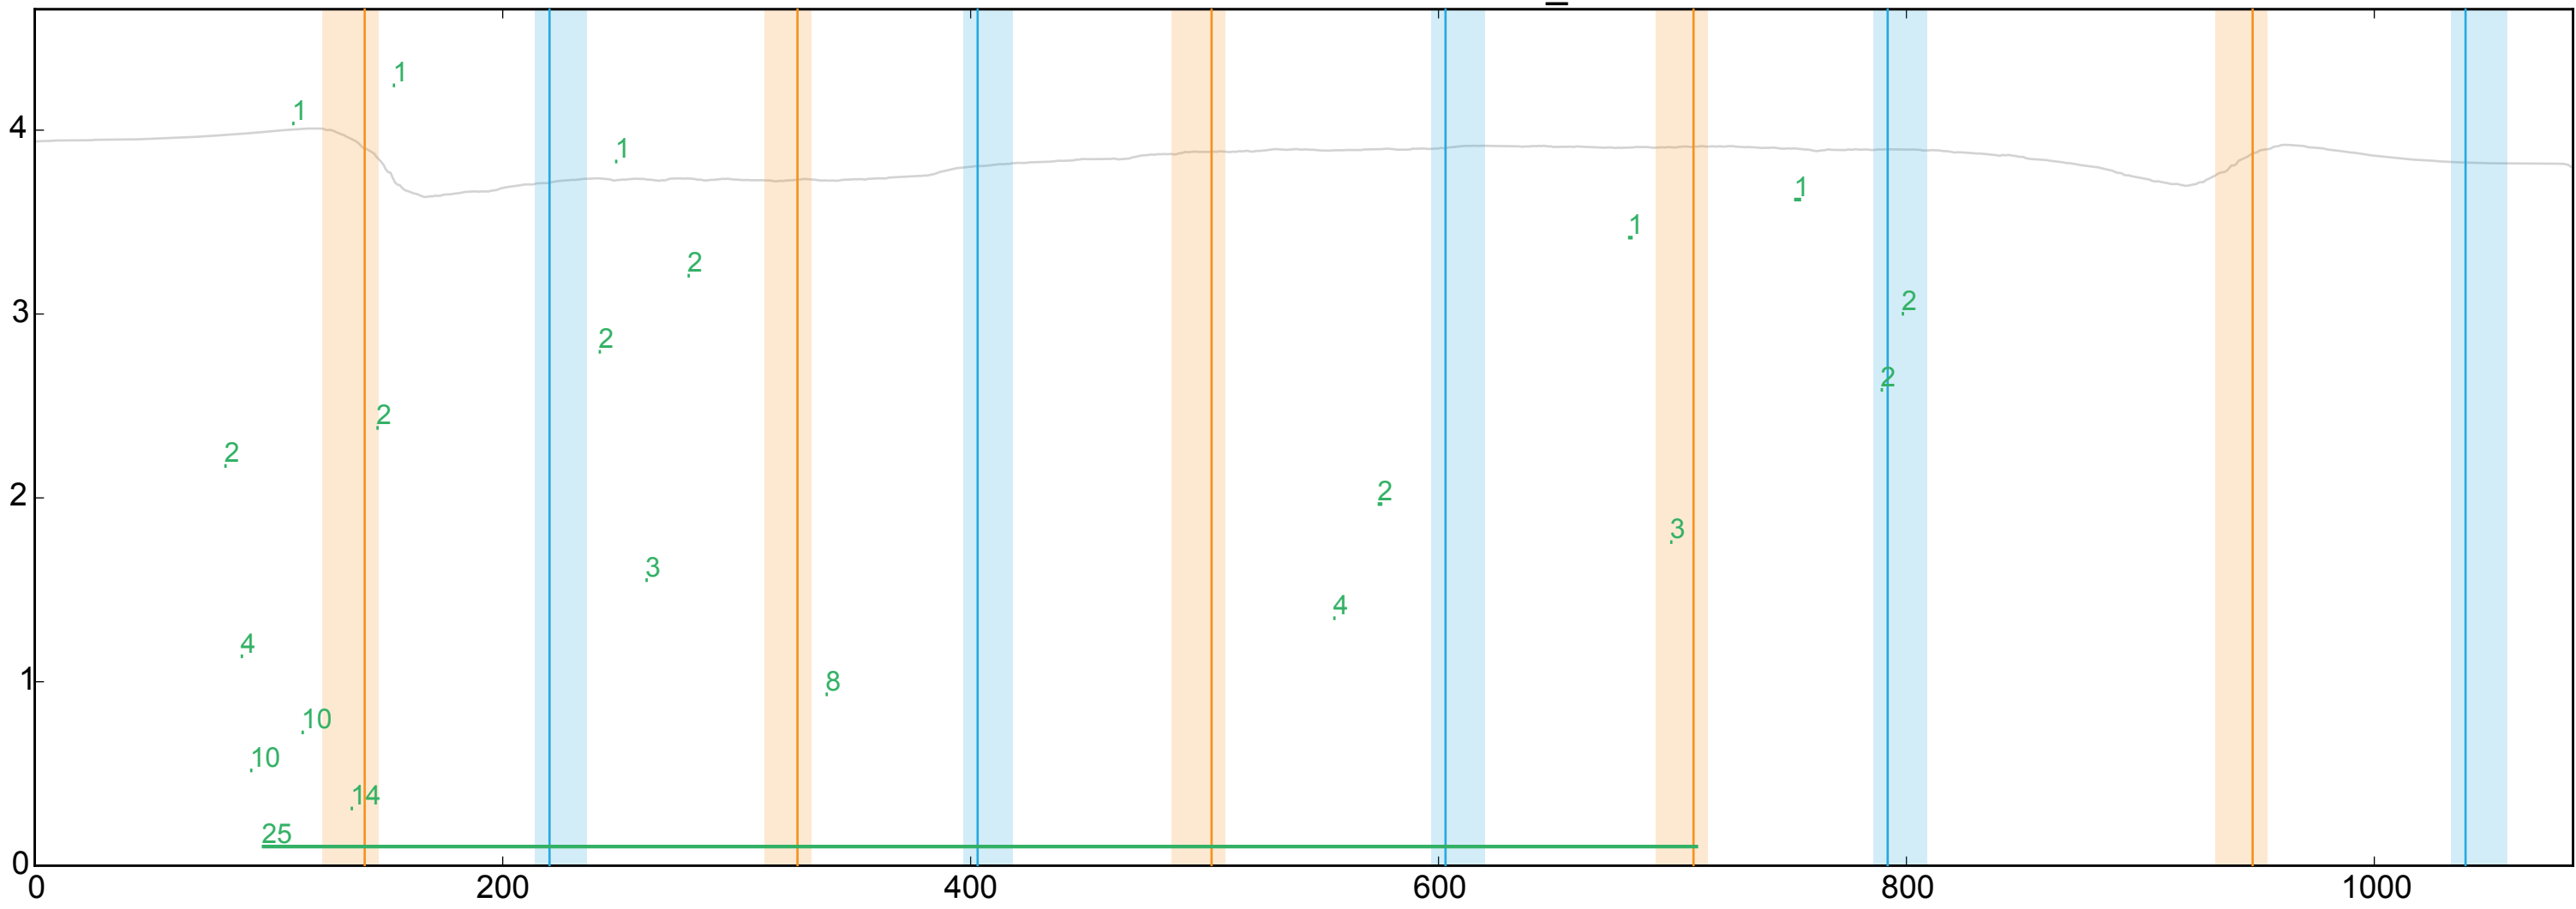

Mutant ENSDARG00000079969\_4

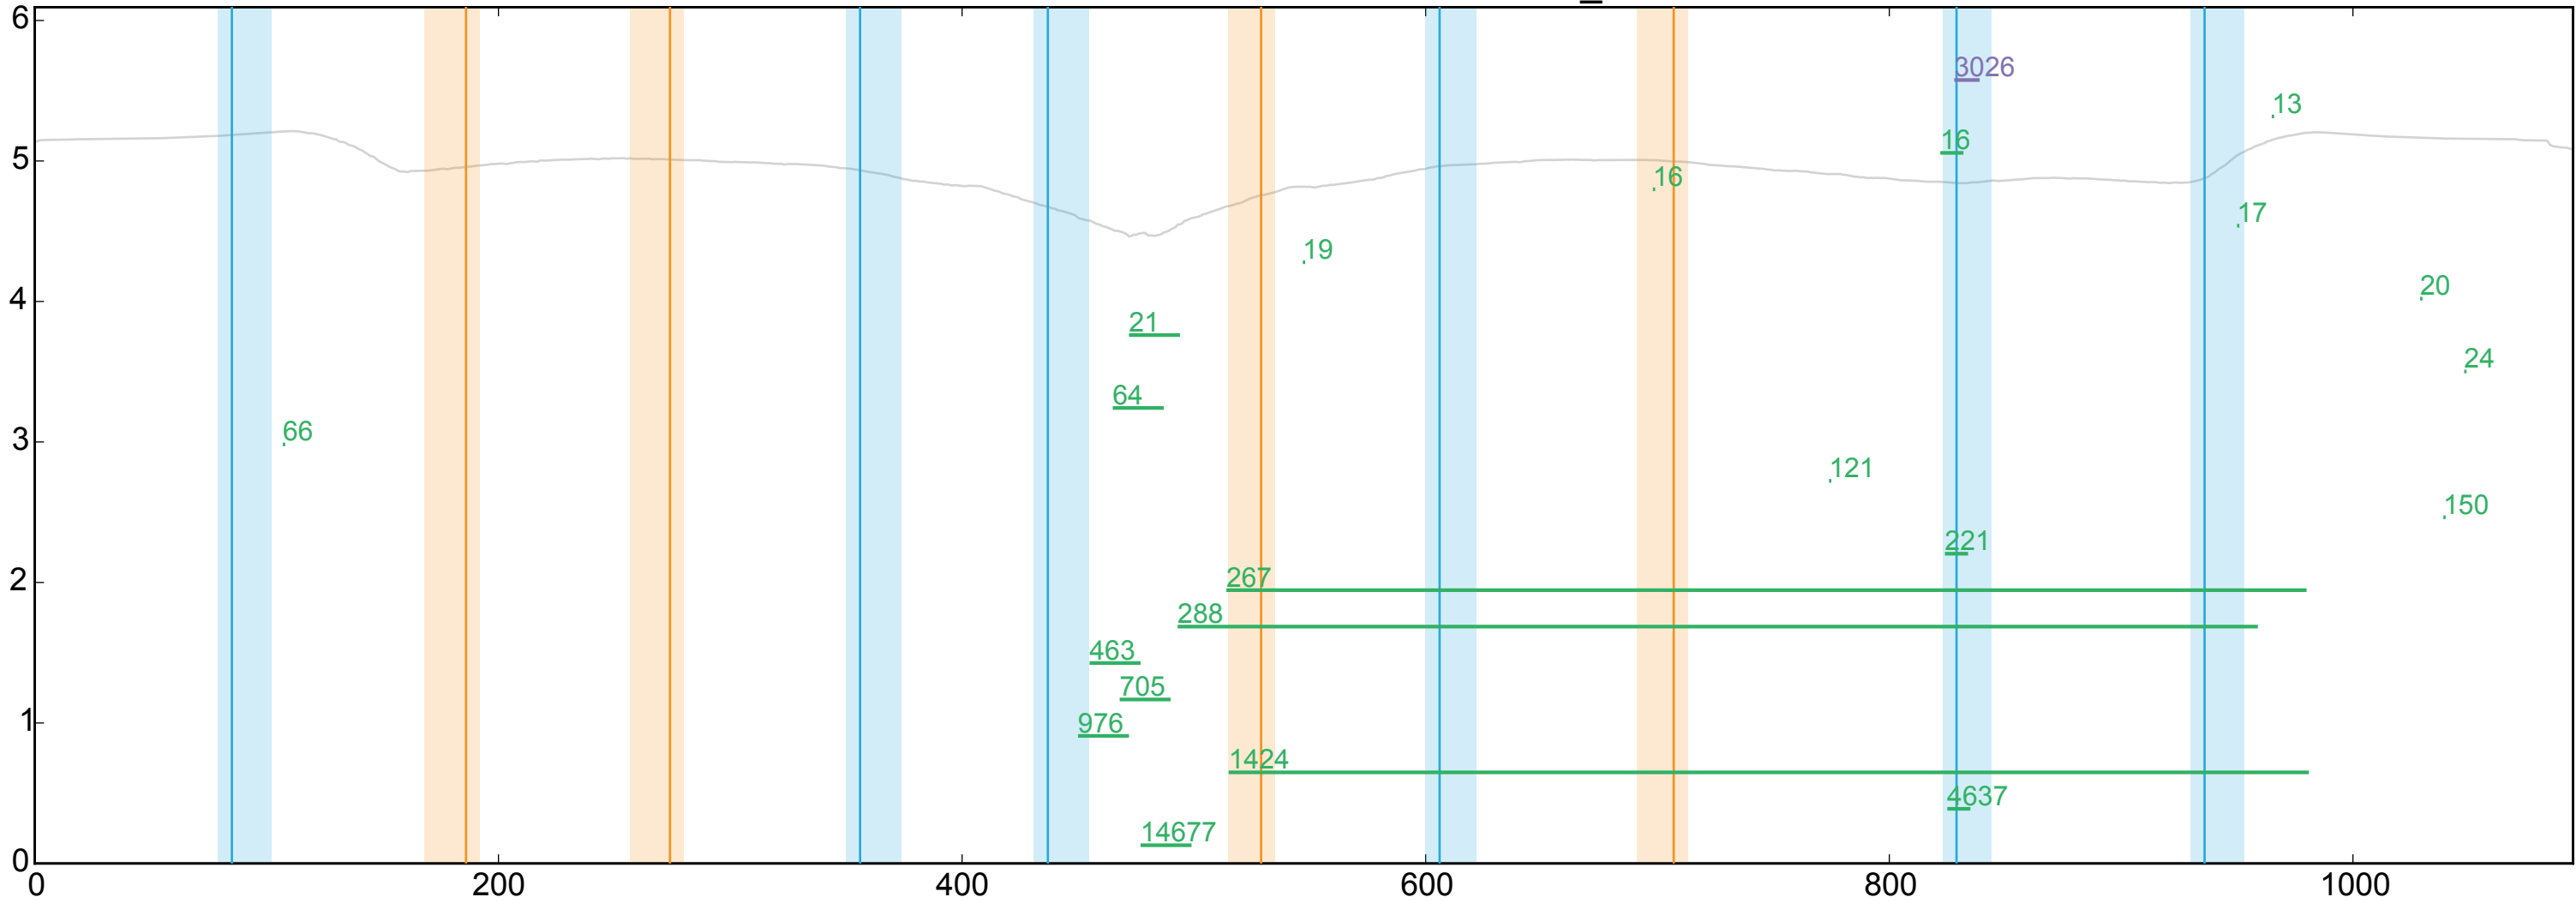

WT ENSDARG00000079969\_4

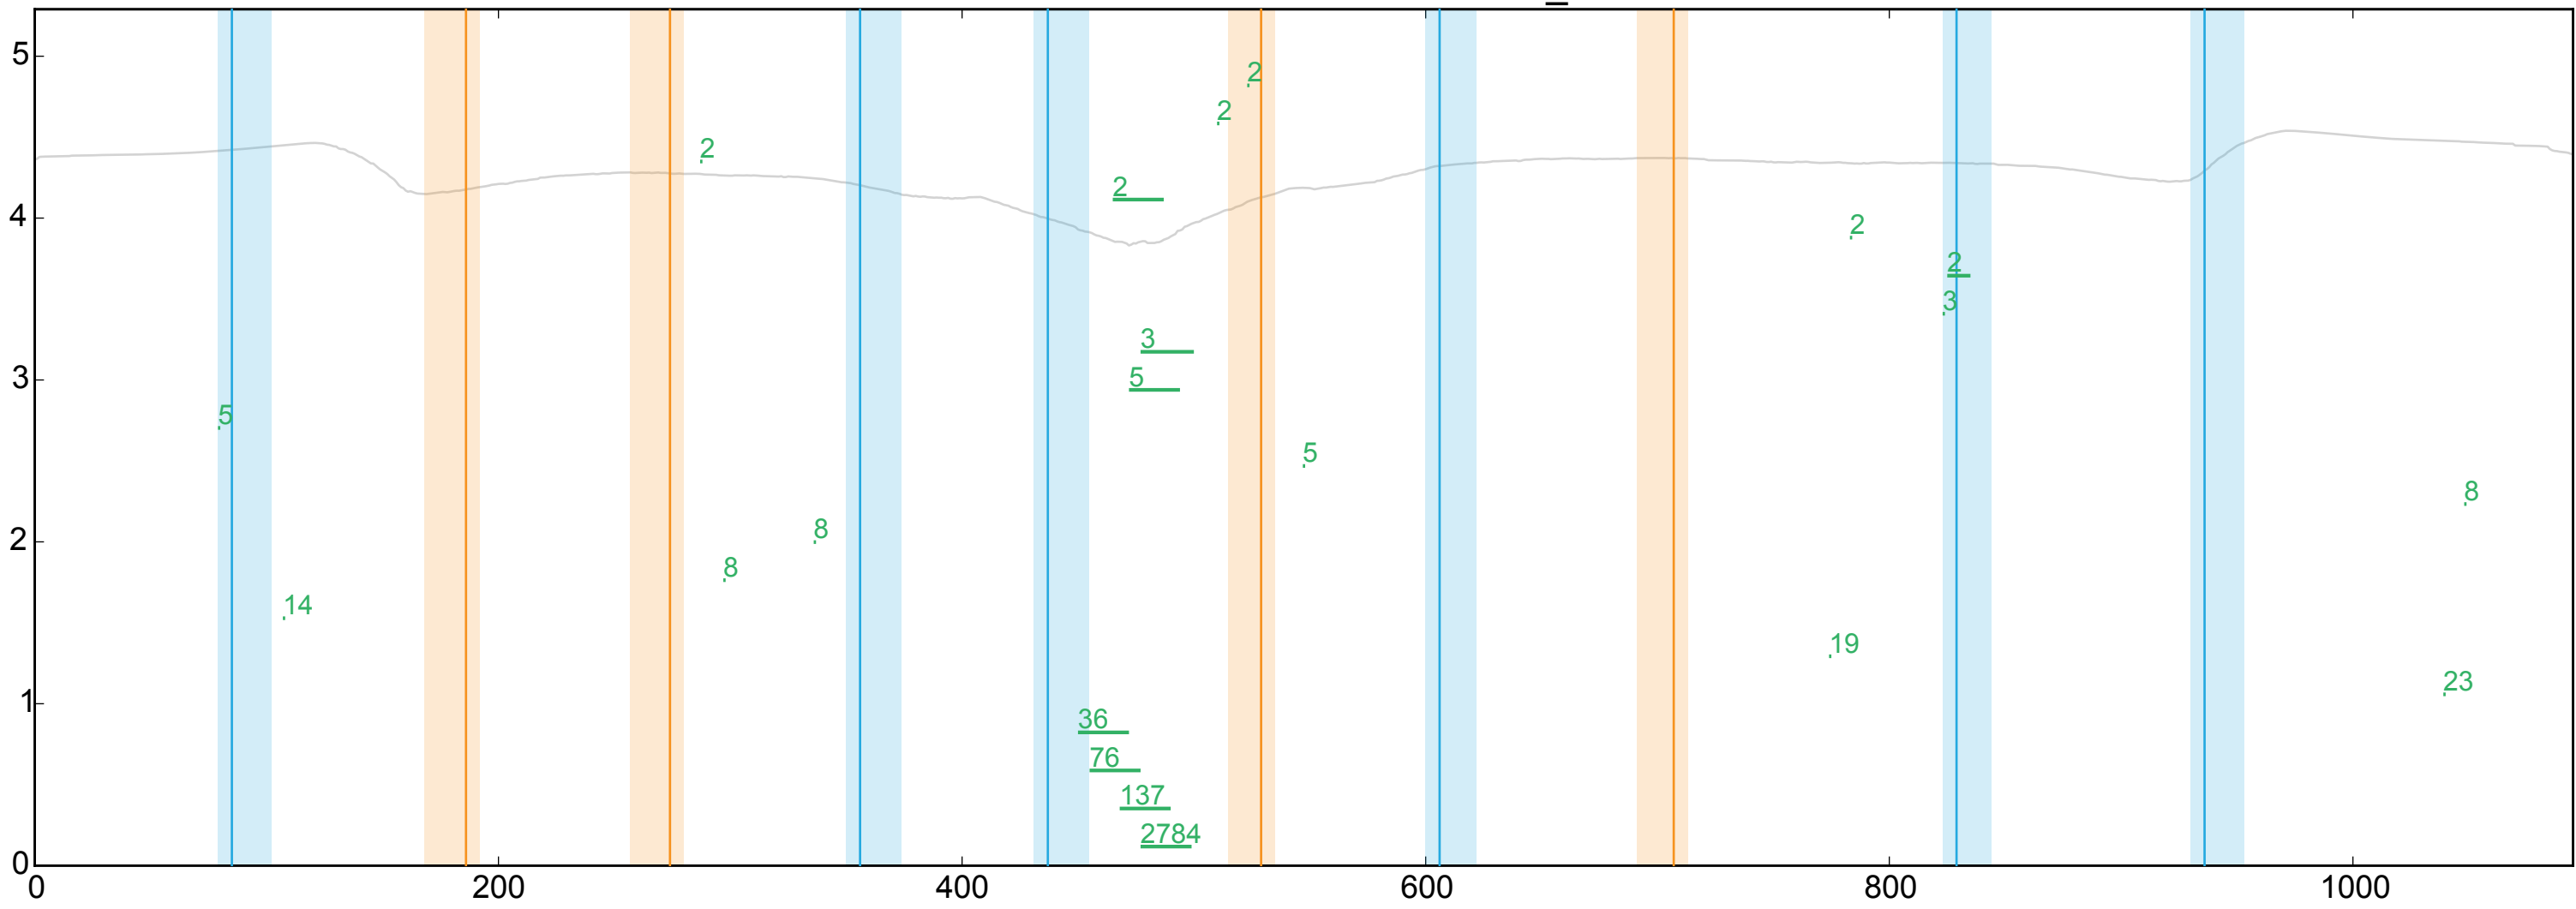

Mutant ENSDARG00000078251\_0

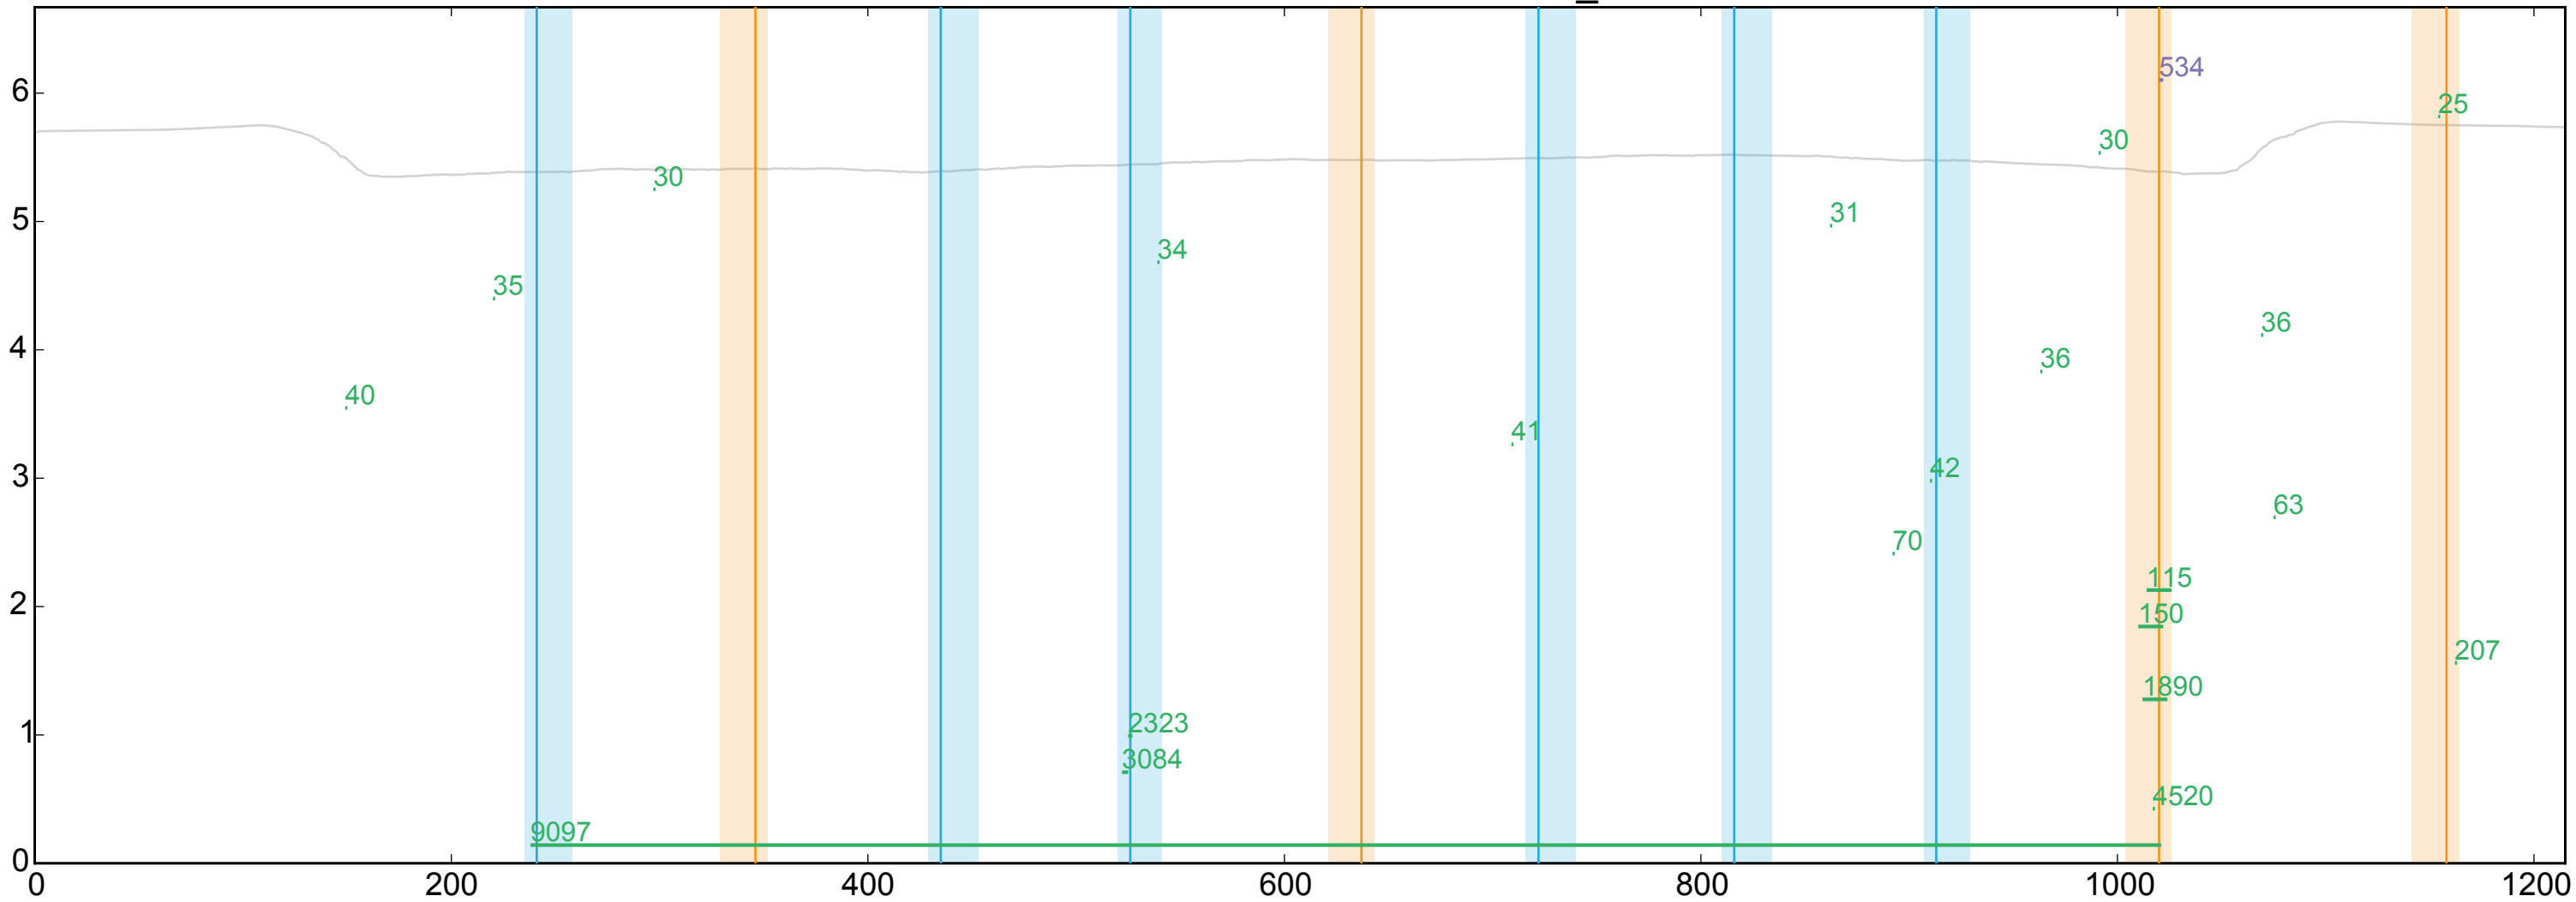

WT ENSDARG00000078251\_0

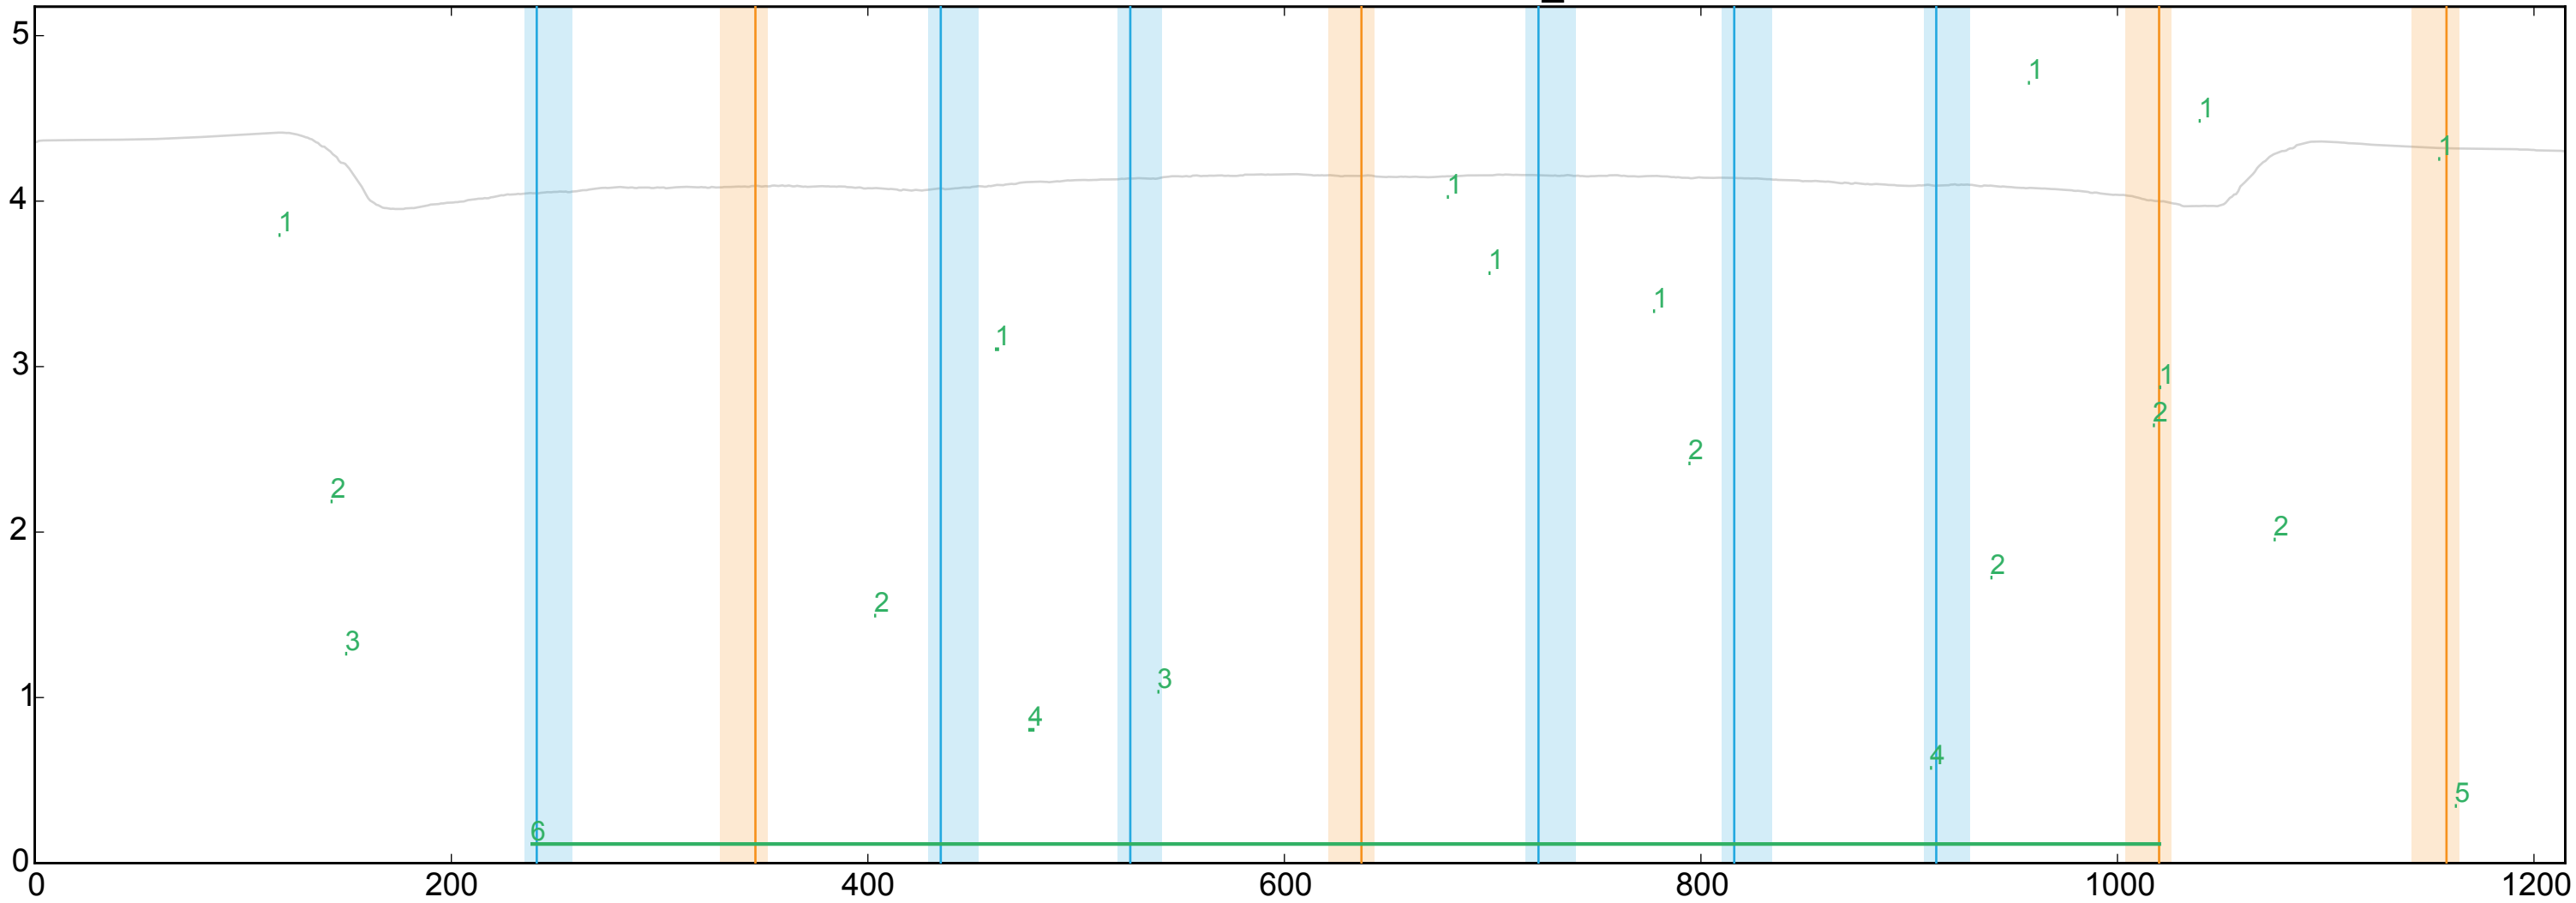

Mutant ENSDARG00000077353\_15

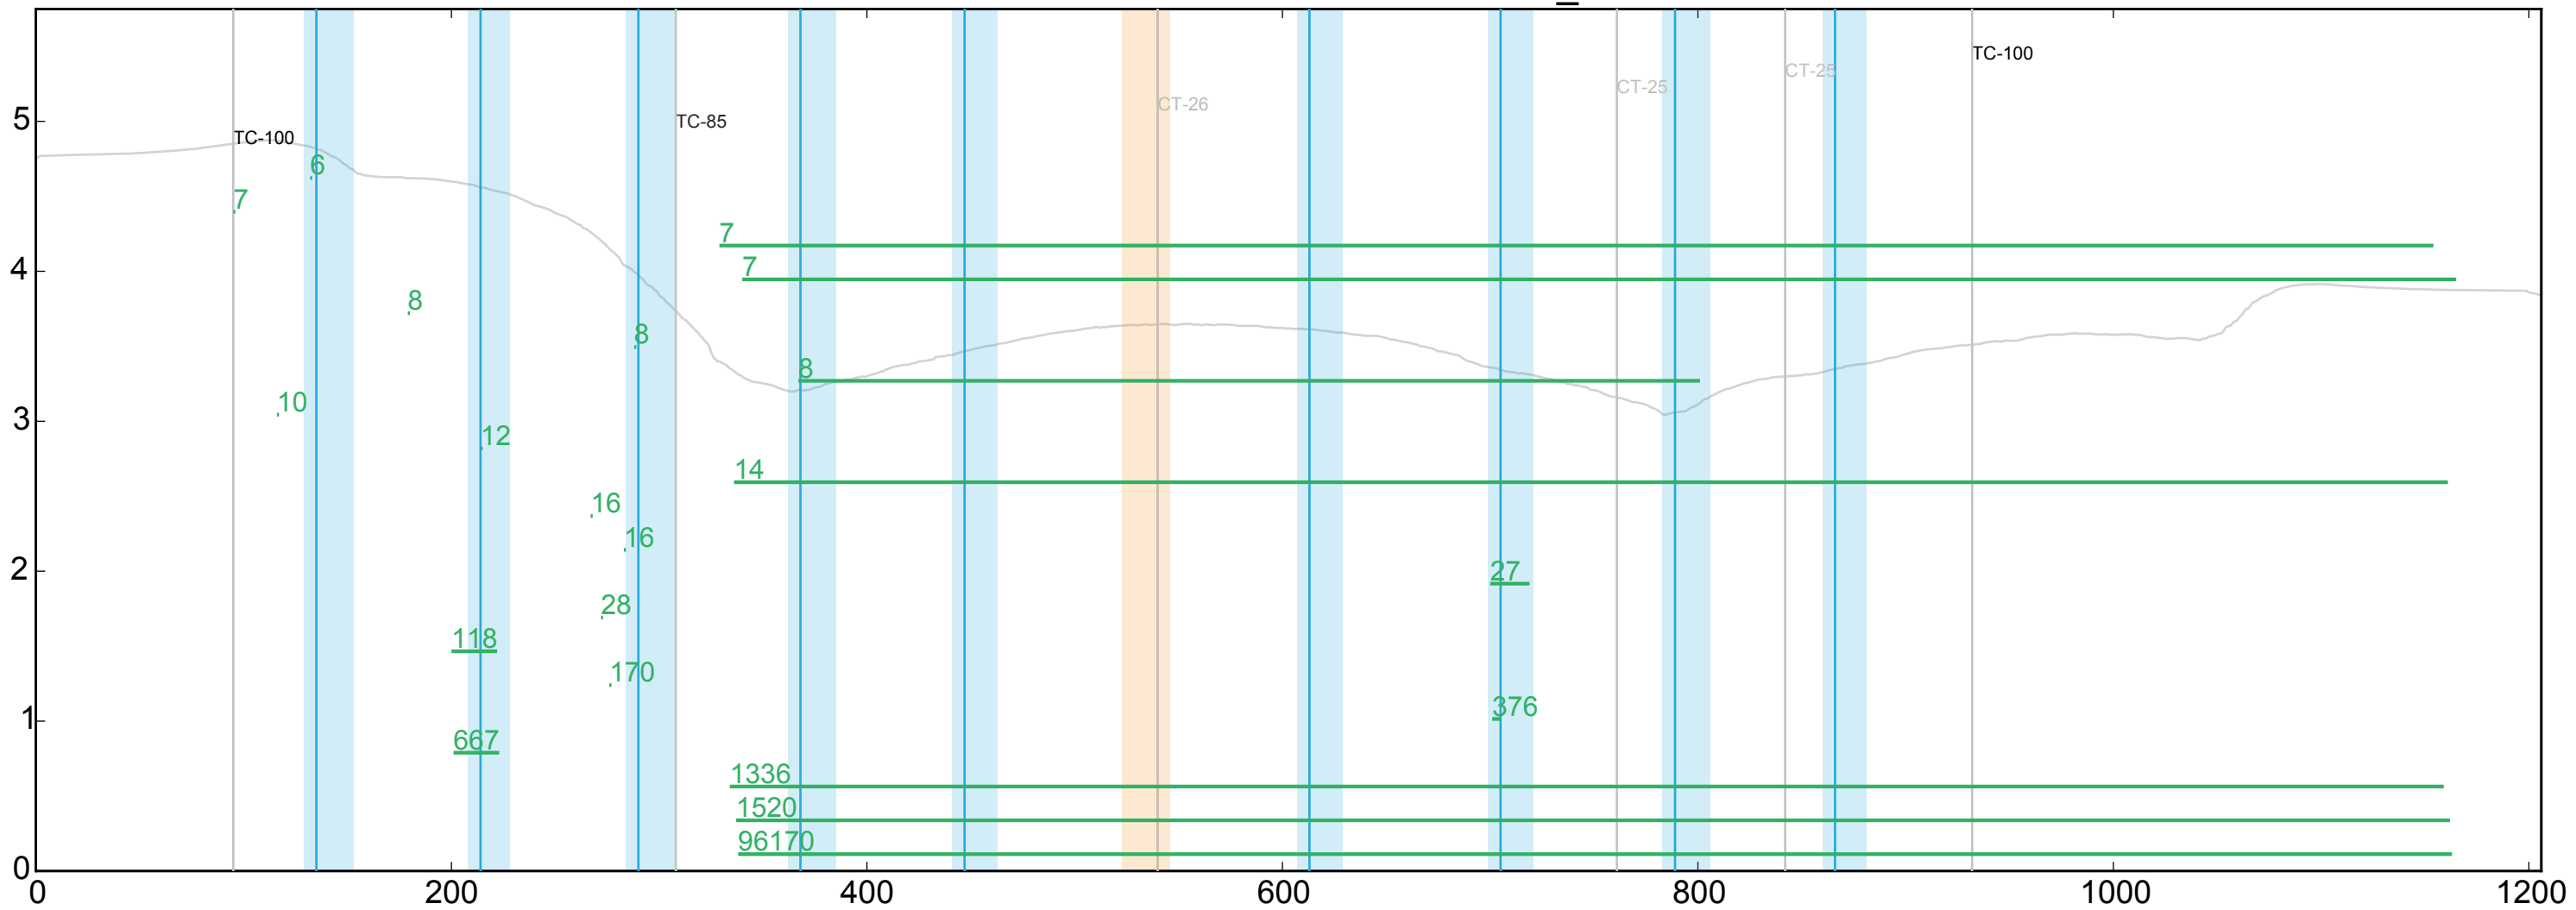

WT ENSDARG00000077353\_15

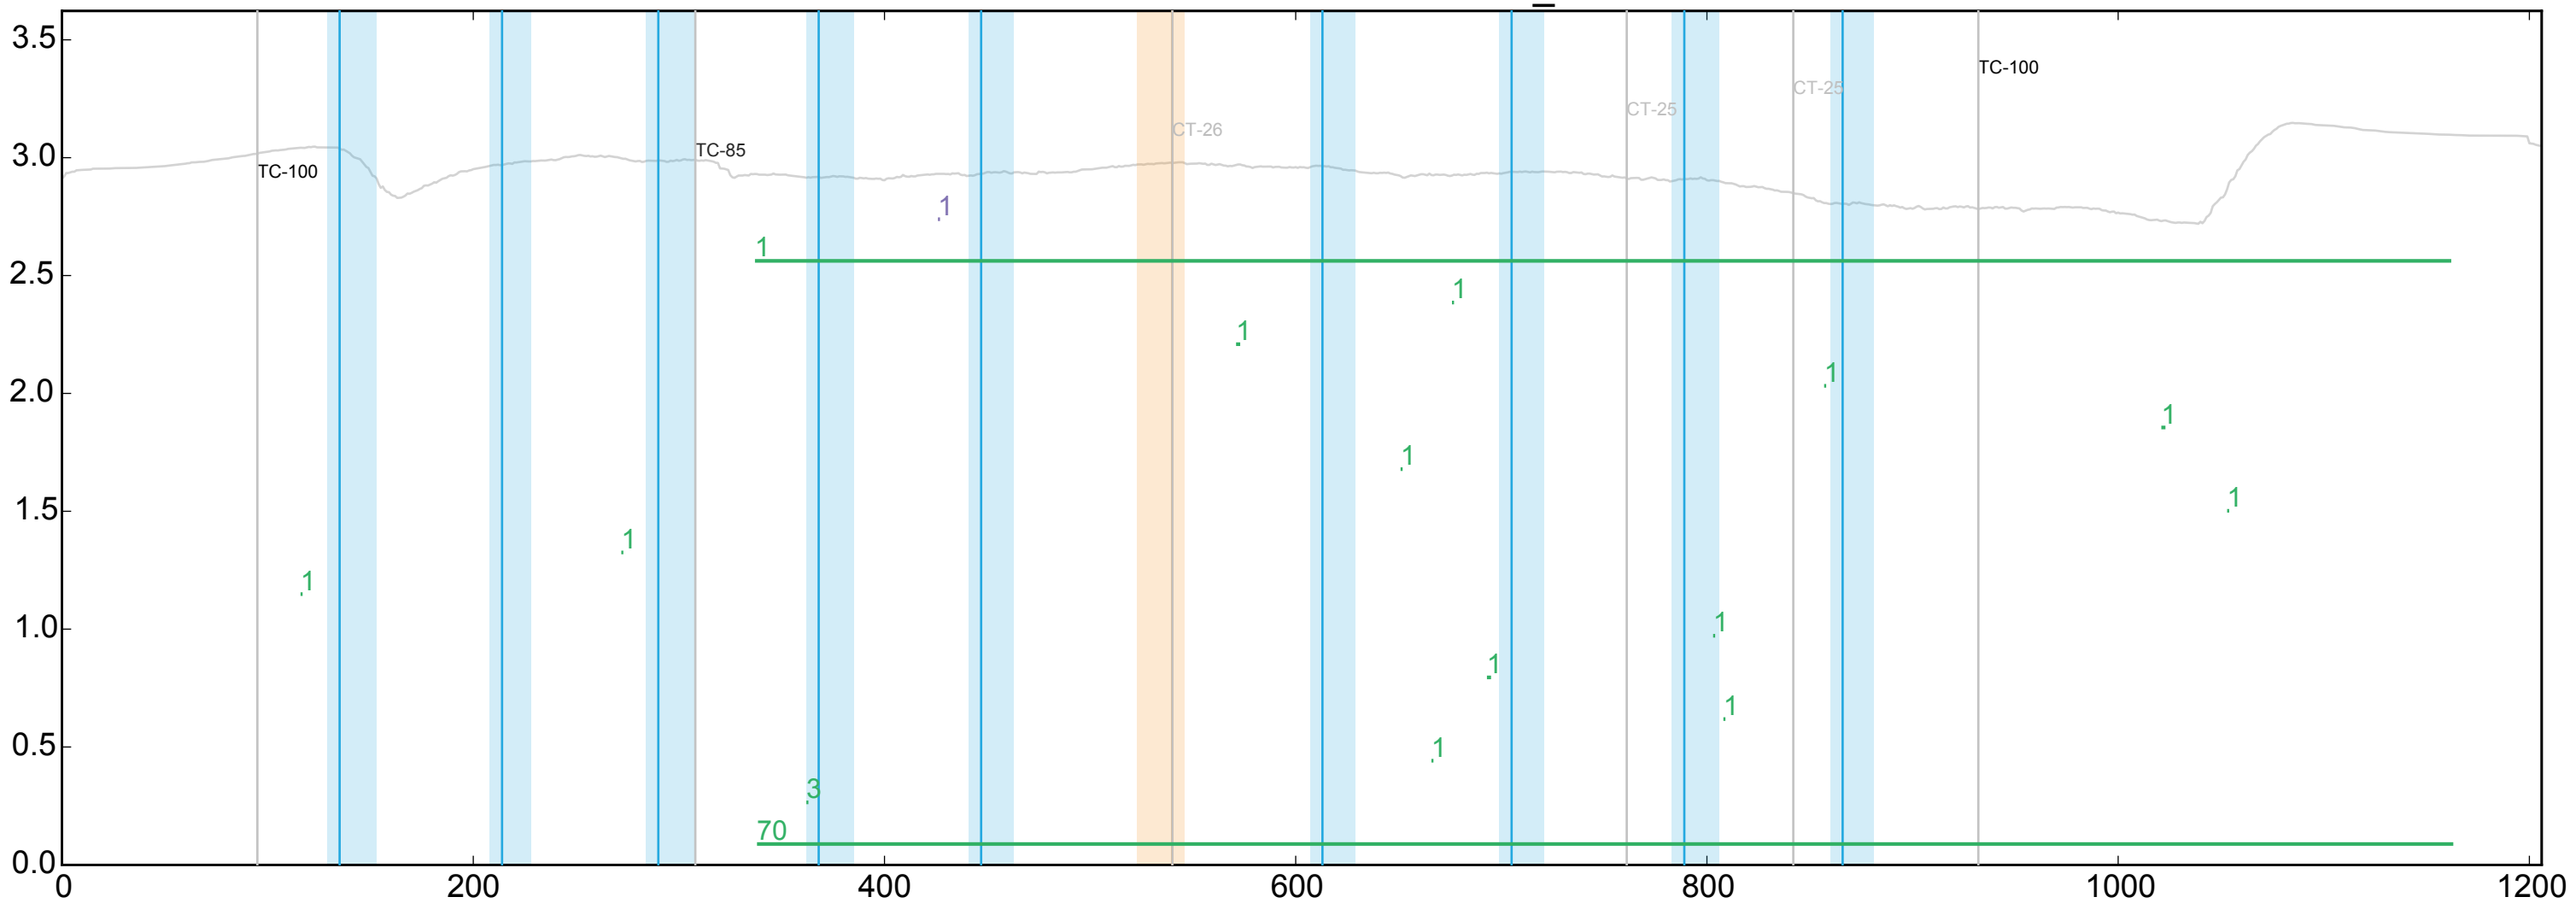

Mutant ENSDARG0000063150\_6

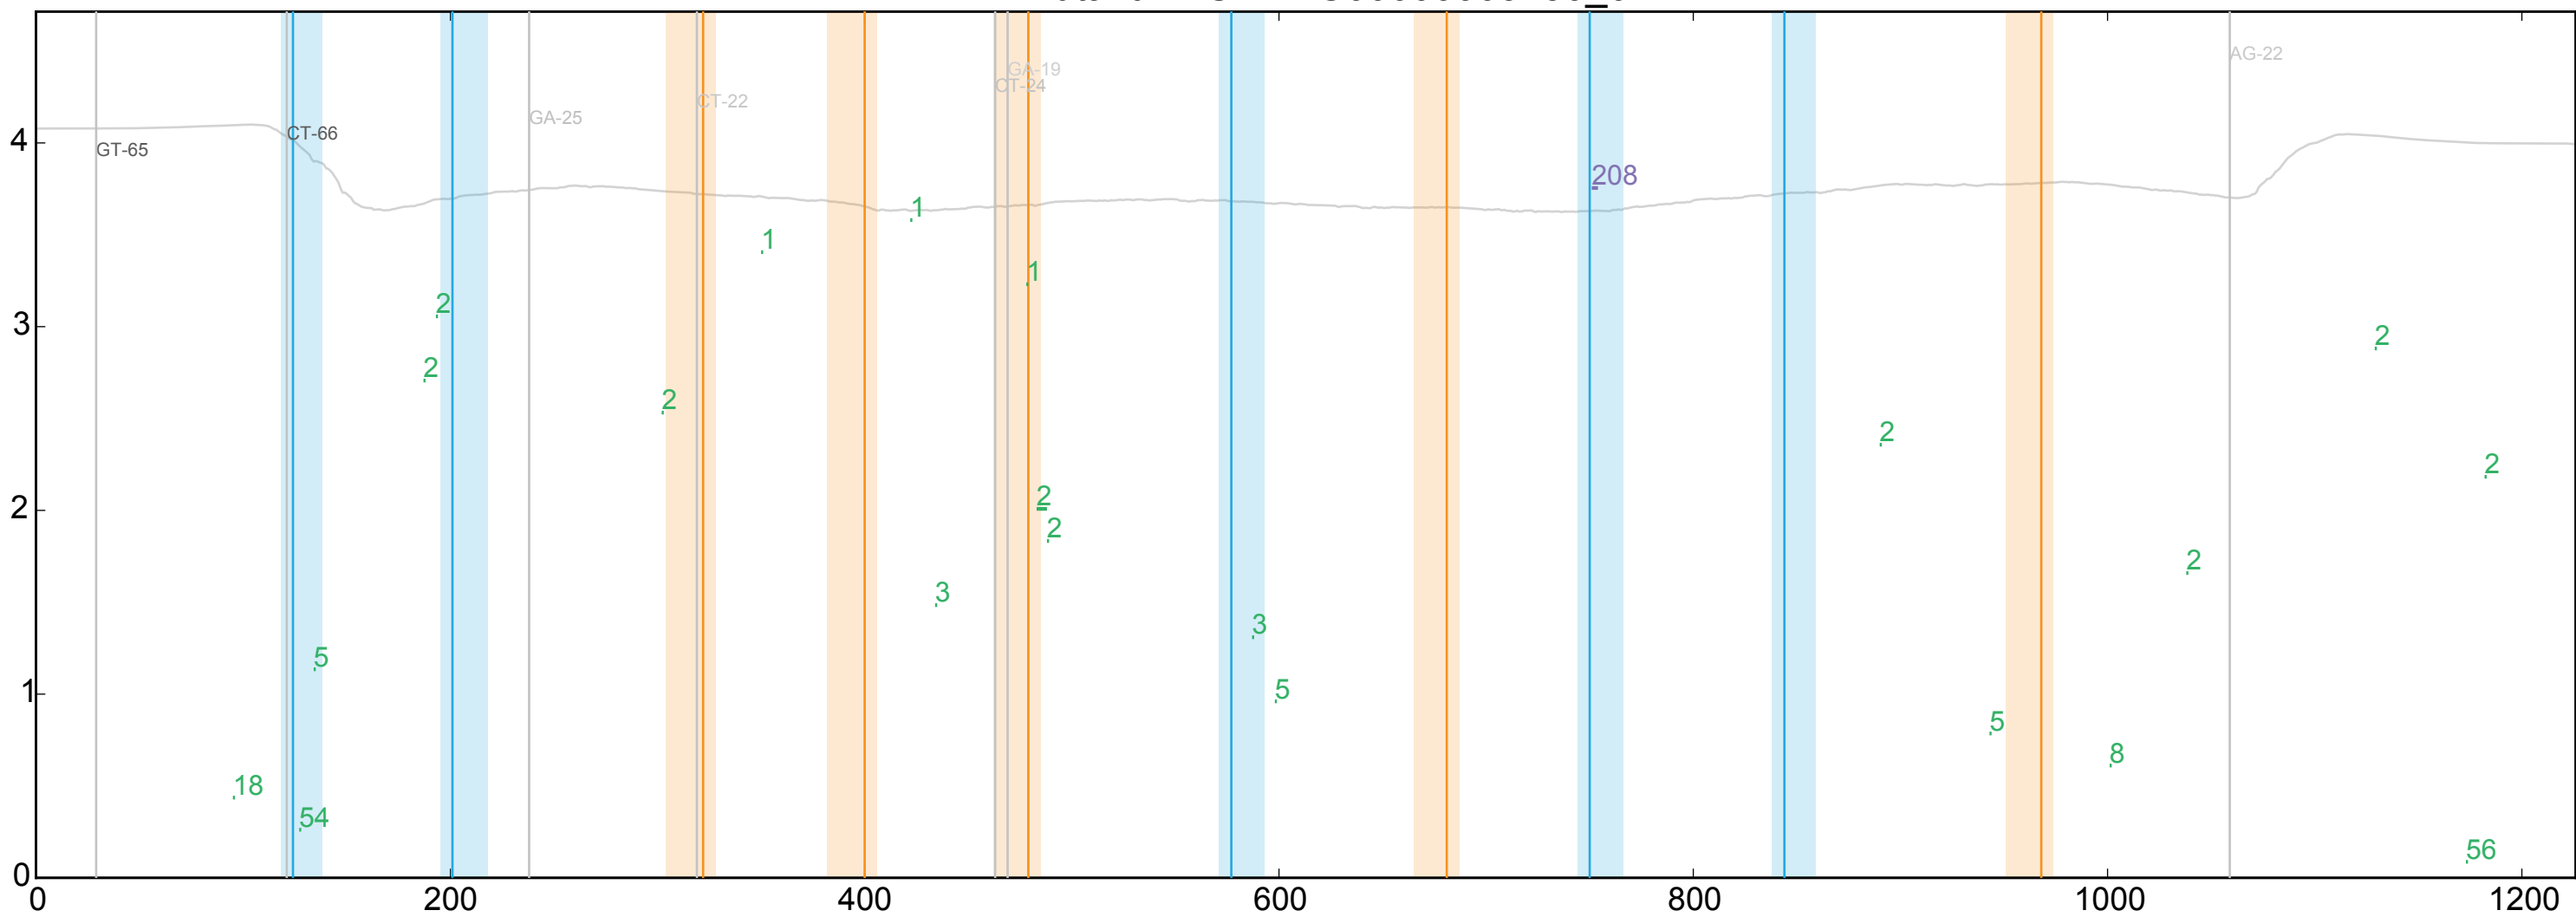

WT ENSDARG0000063150\_6

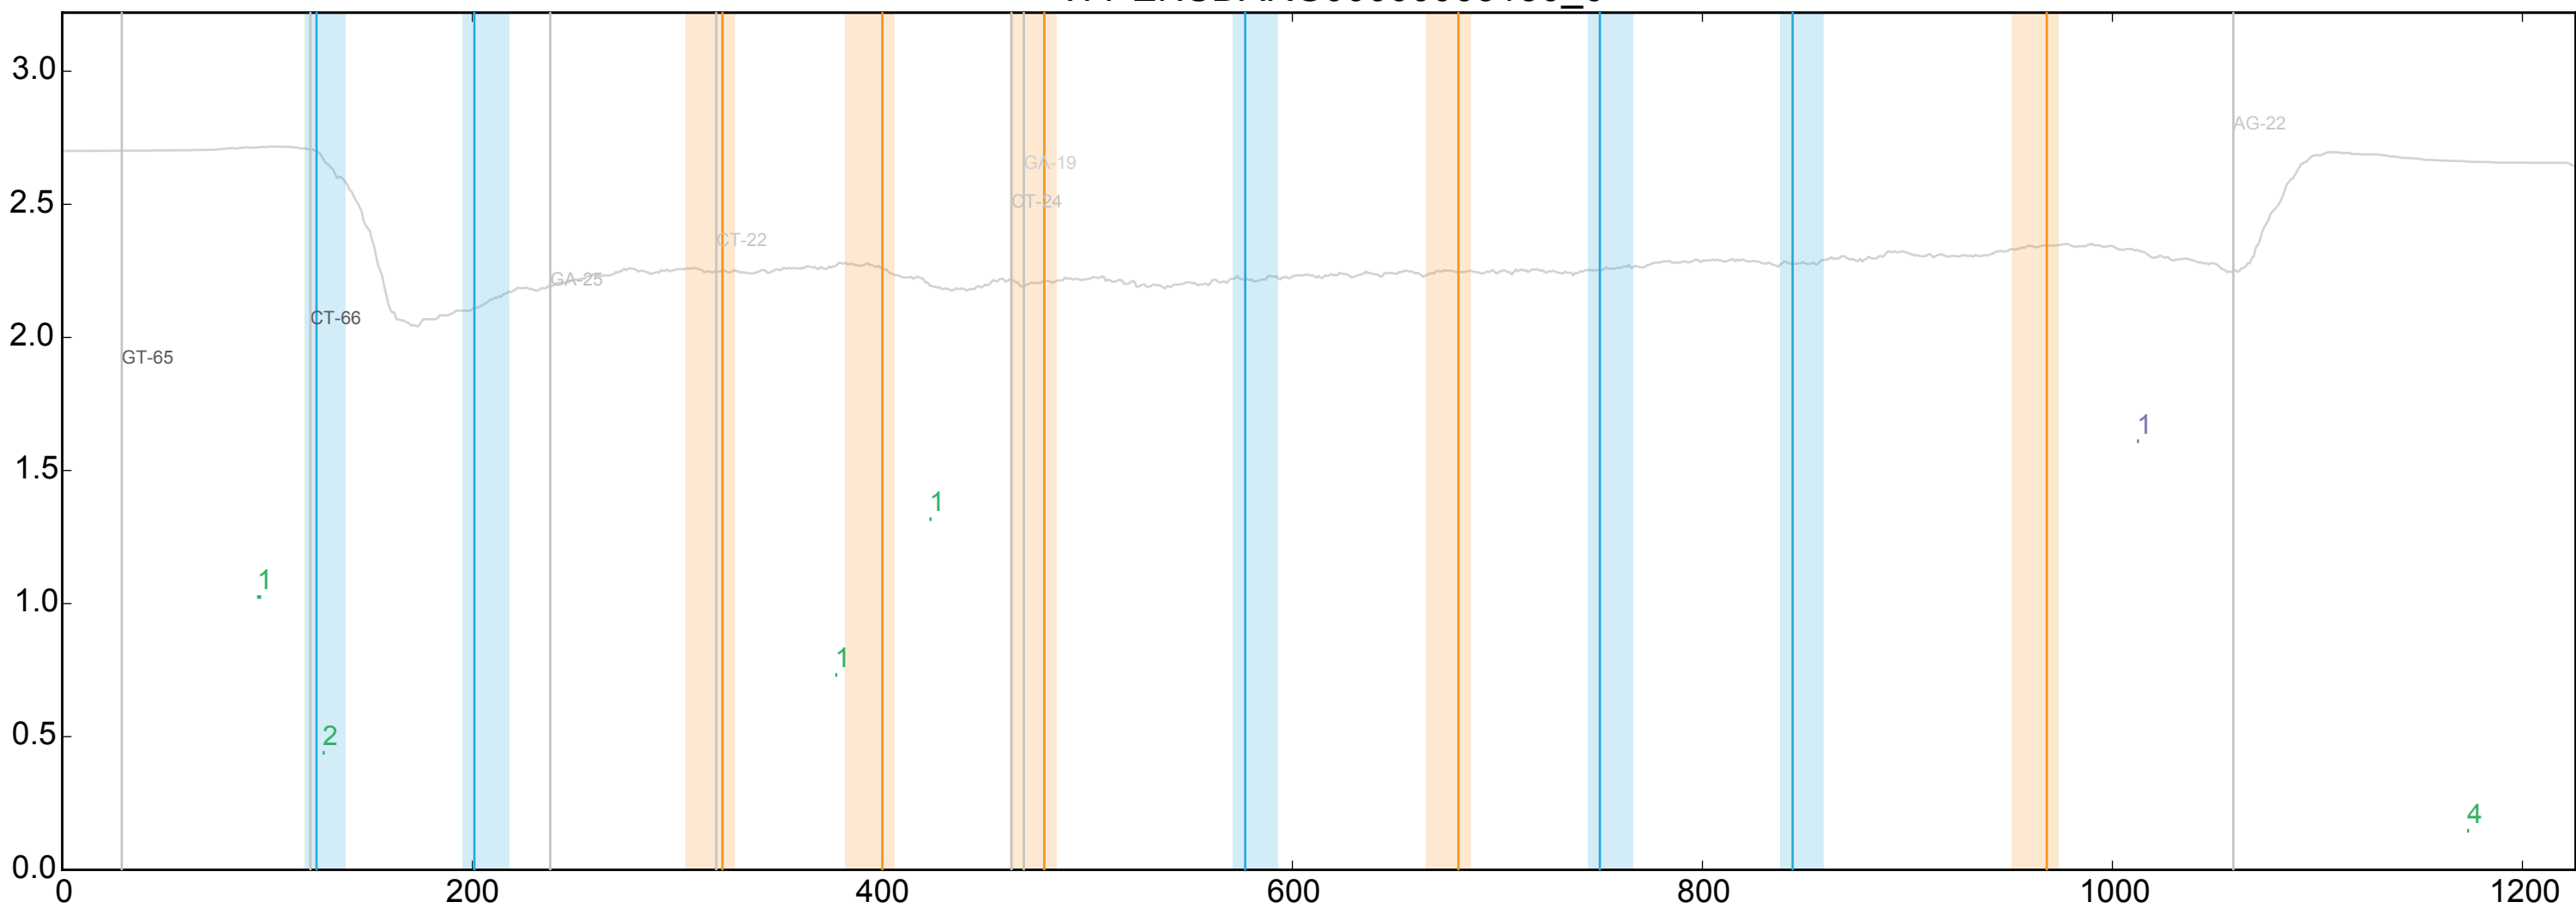

Mutant ENSDARG00000073817\_2

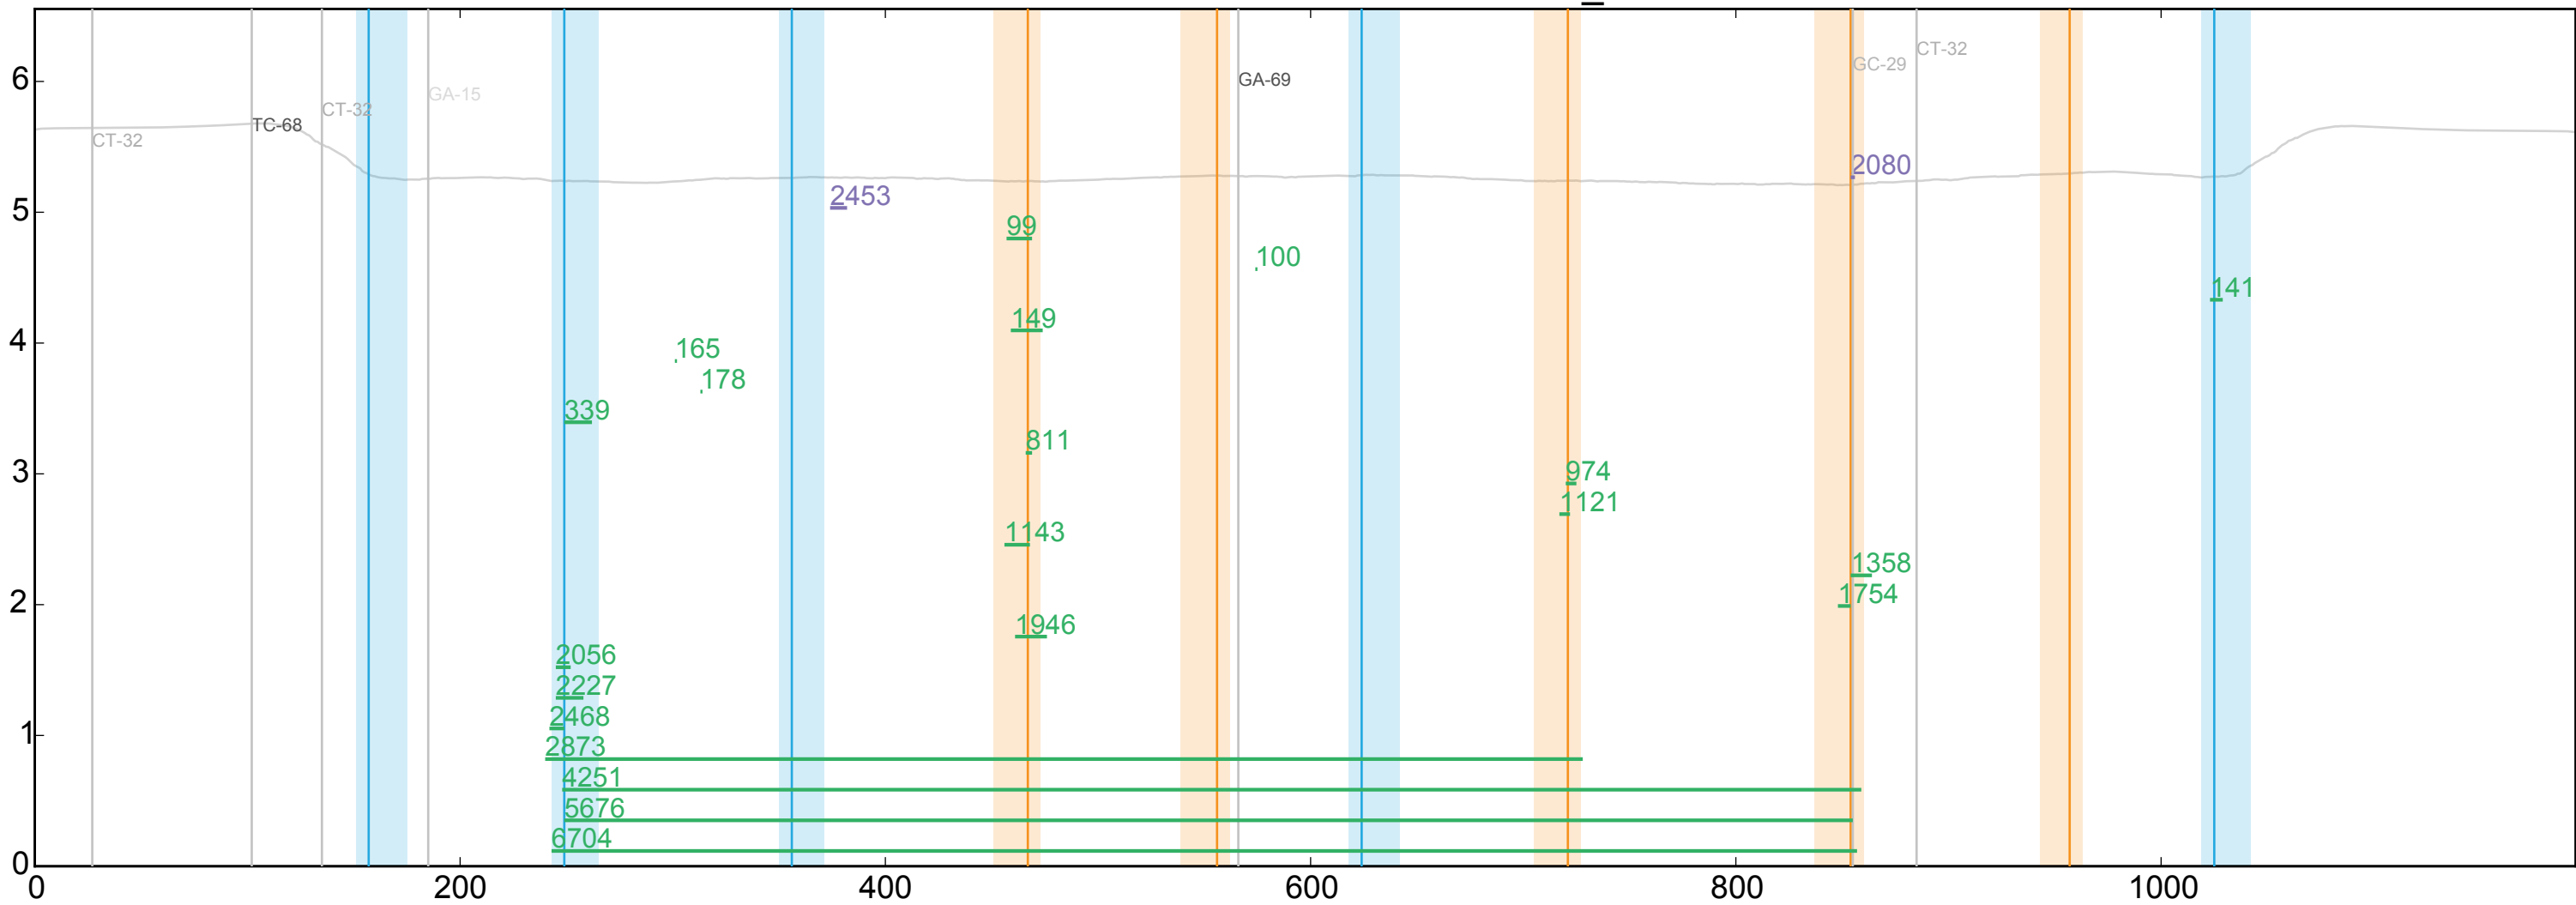

WT ENSDARG00000073817\_2

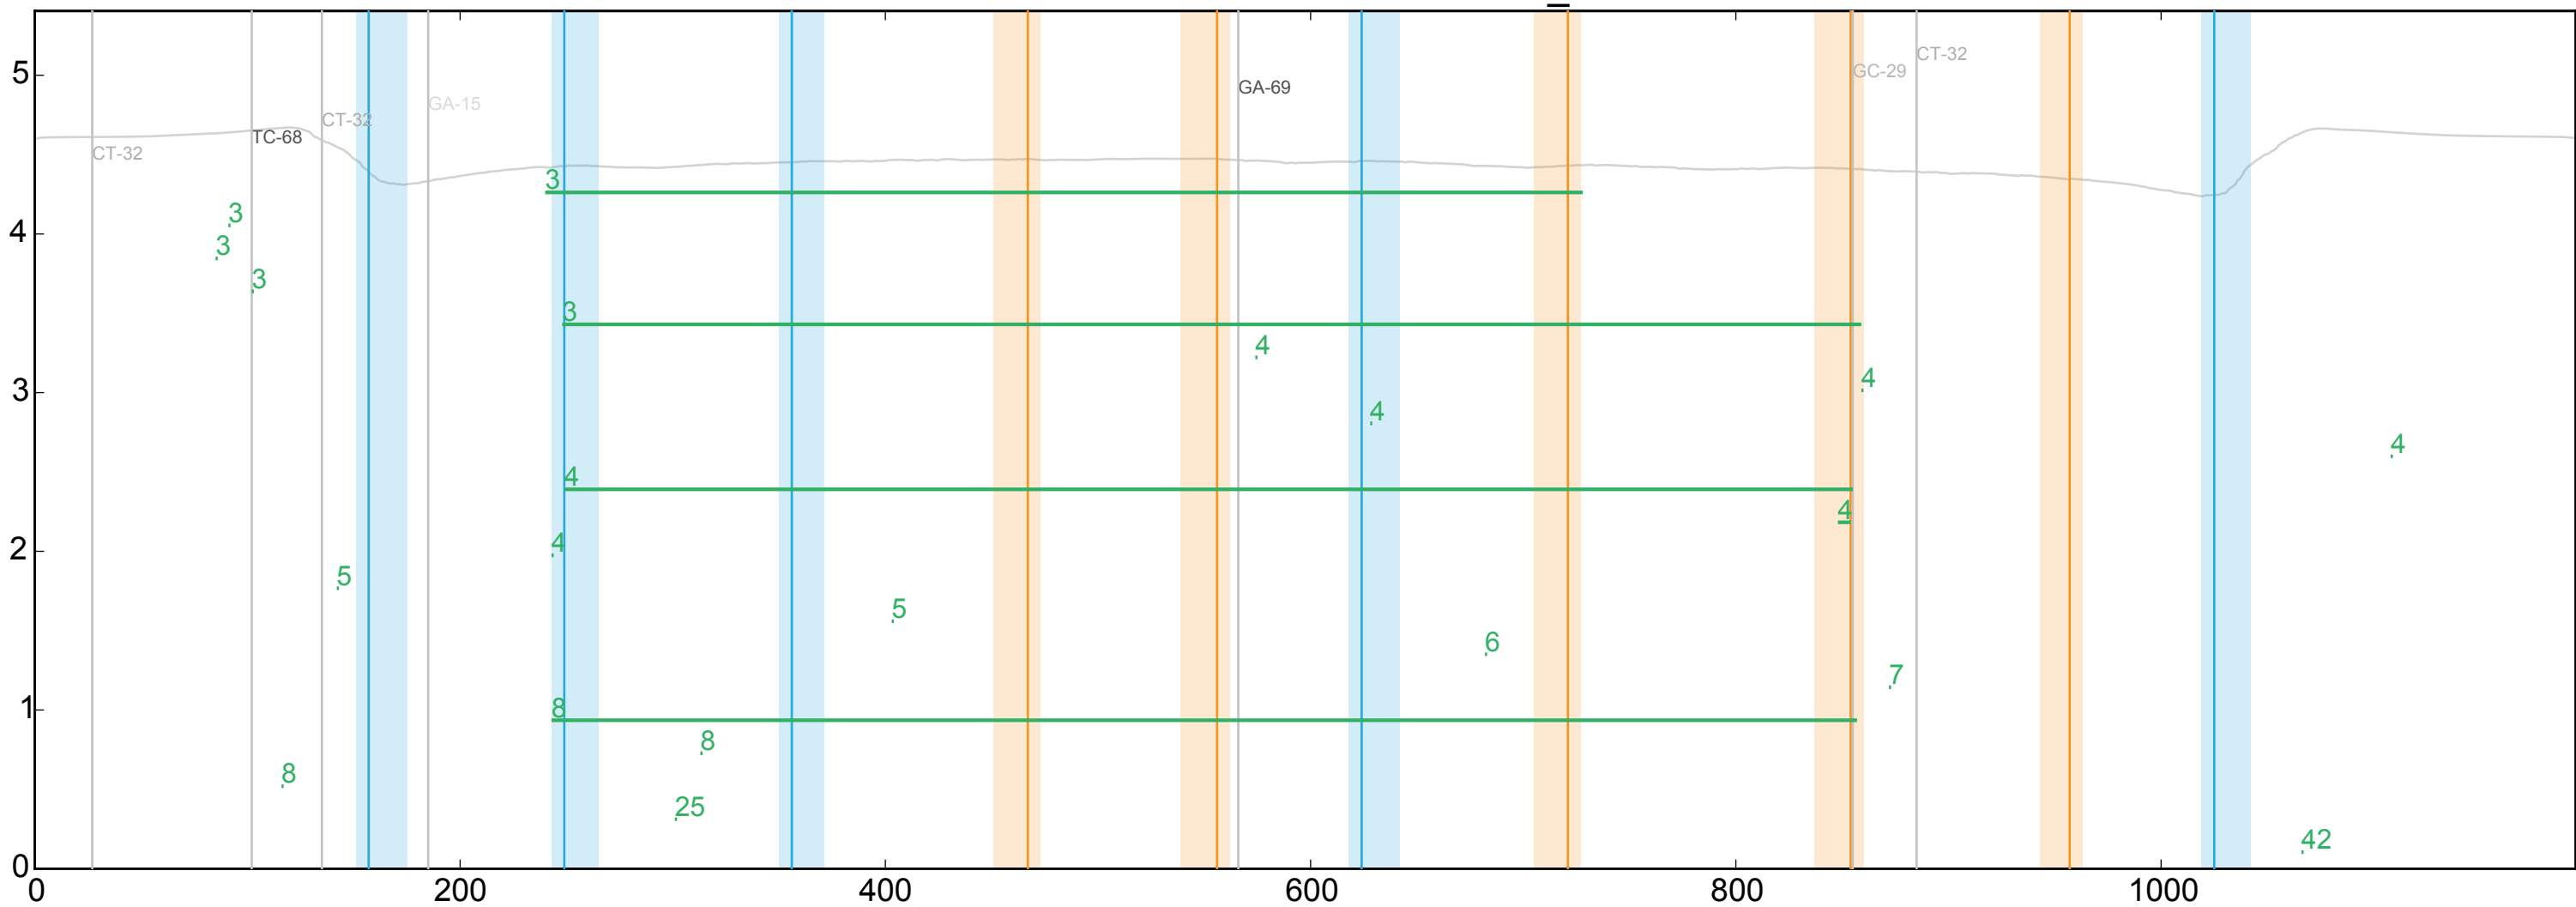

Mutant ENSDARG00000077842\_7

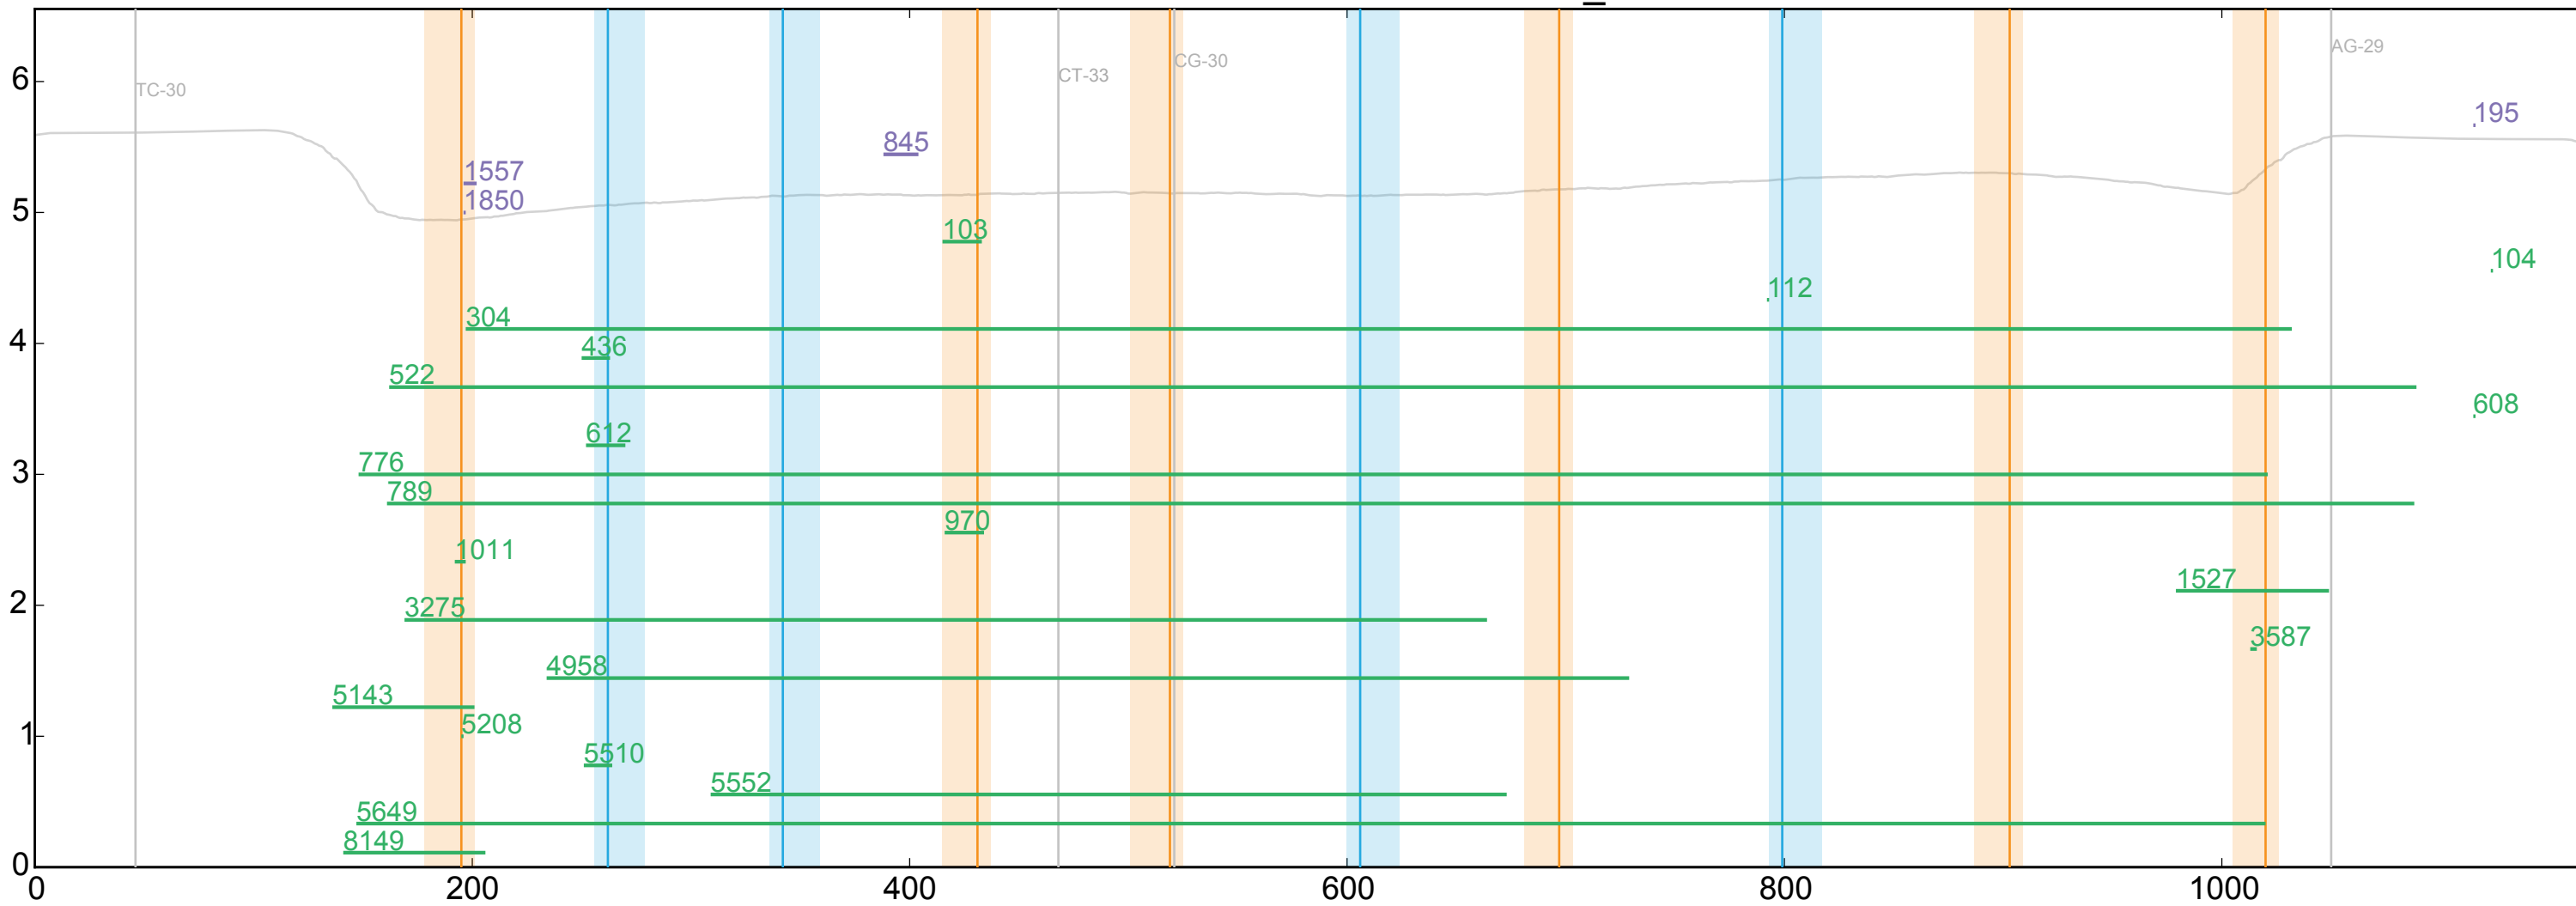

WT ENSDARG00000077842\_7

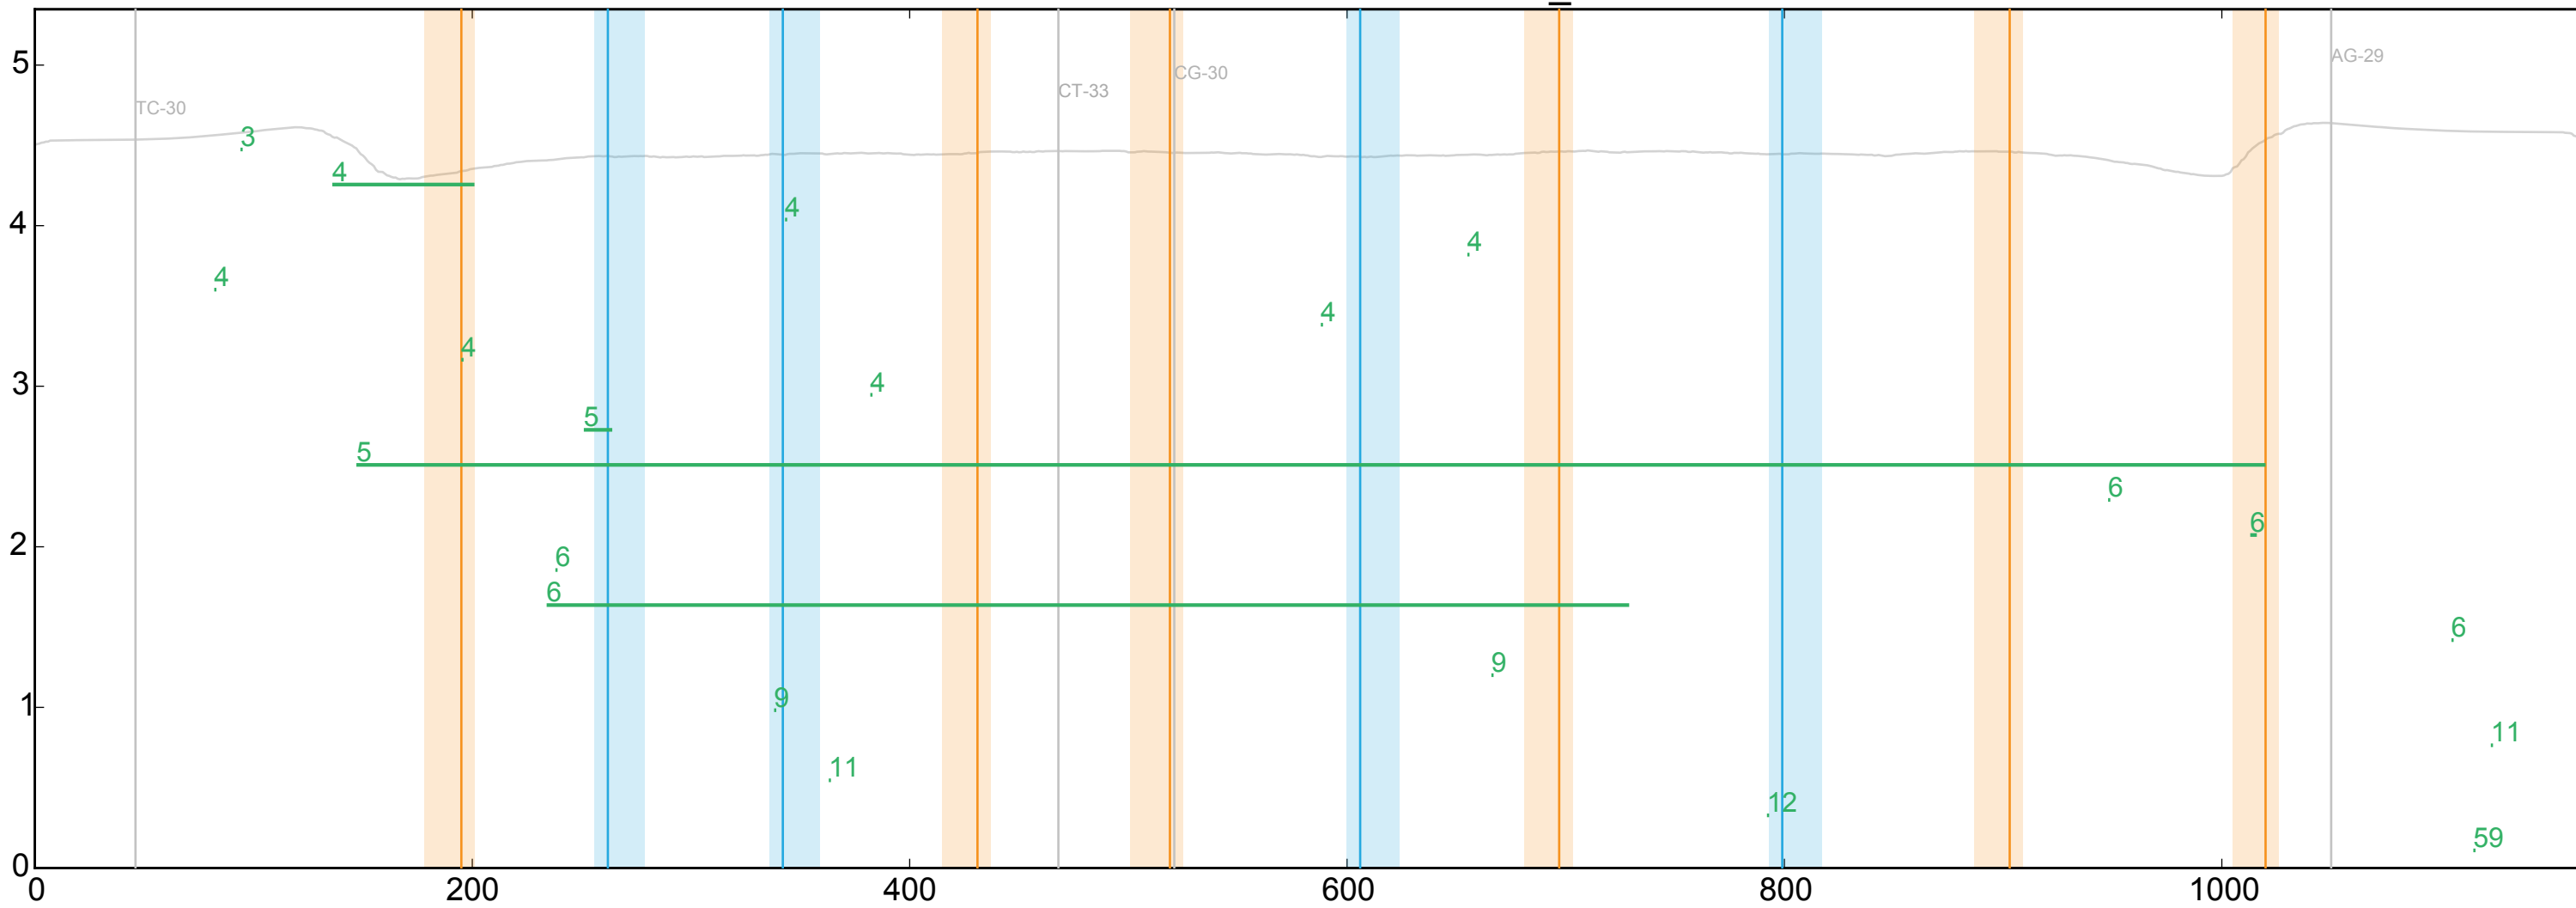

Mutant ENSDARG00000057582\_0

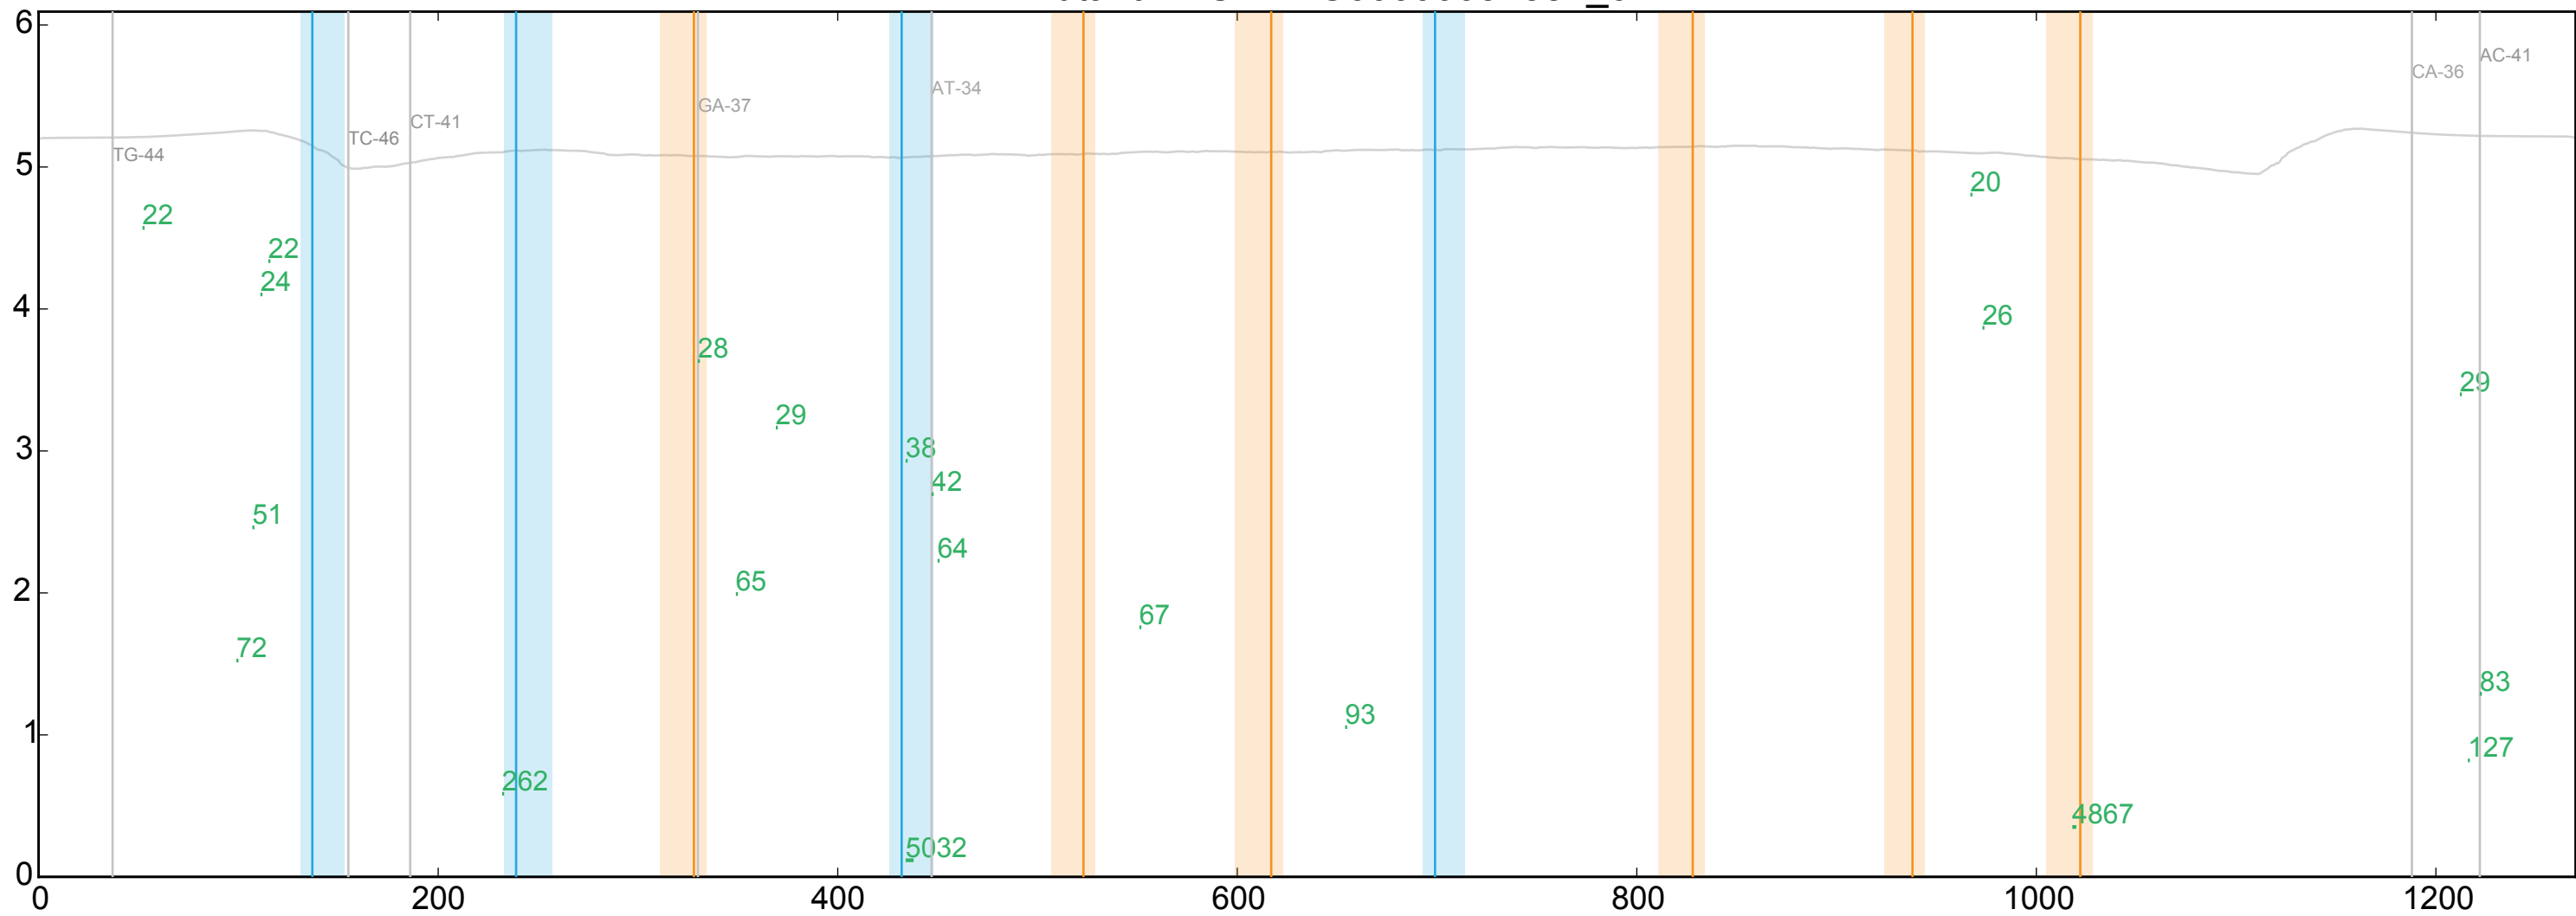

WT ENSDARG00000057582\_0

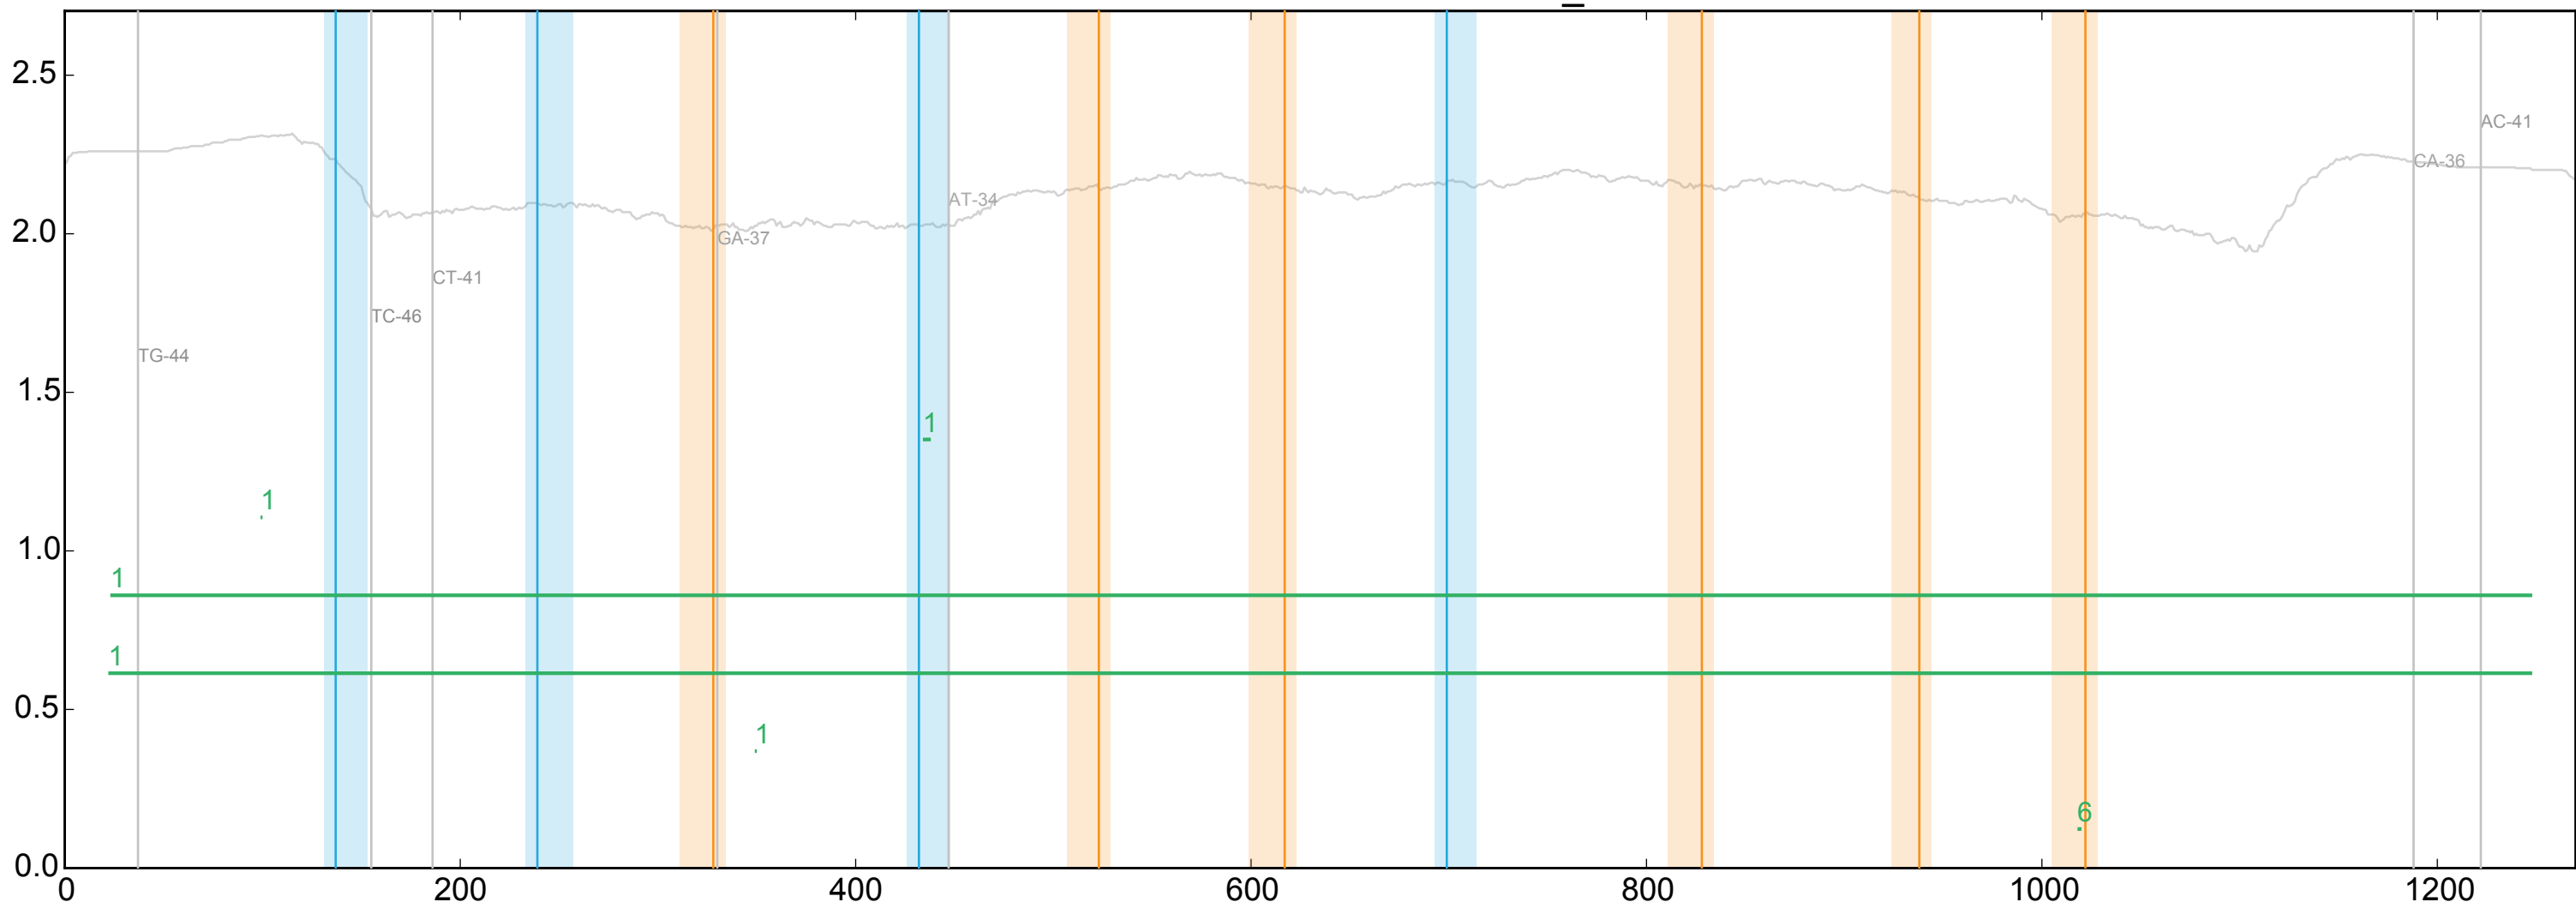



Mutant ENSDARG00000004473\_5

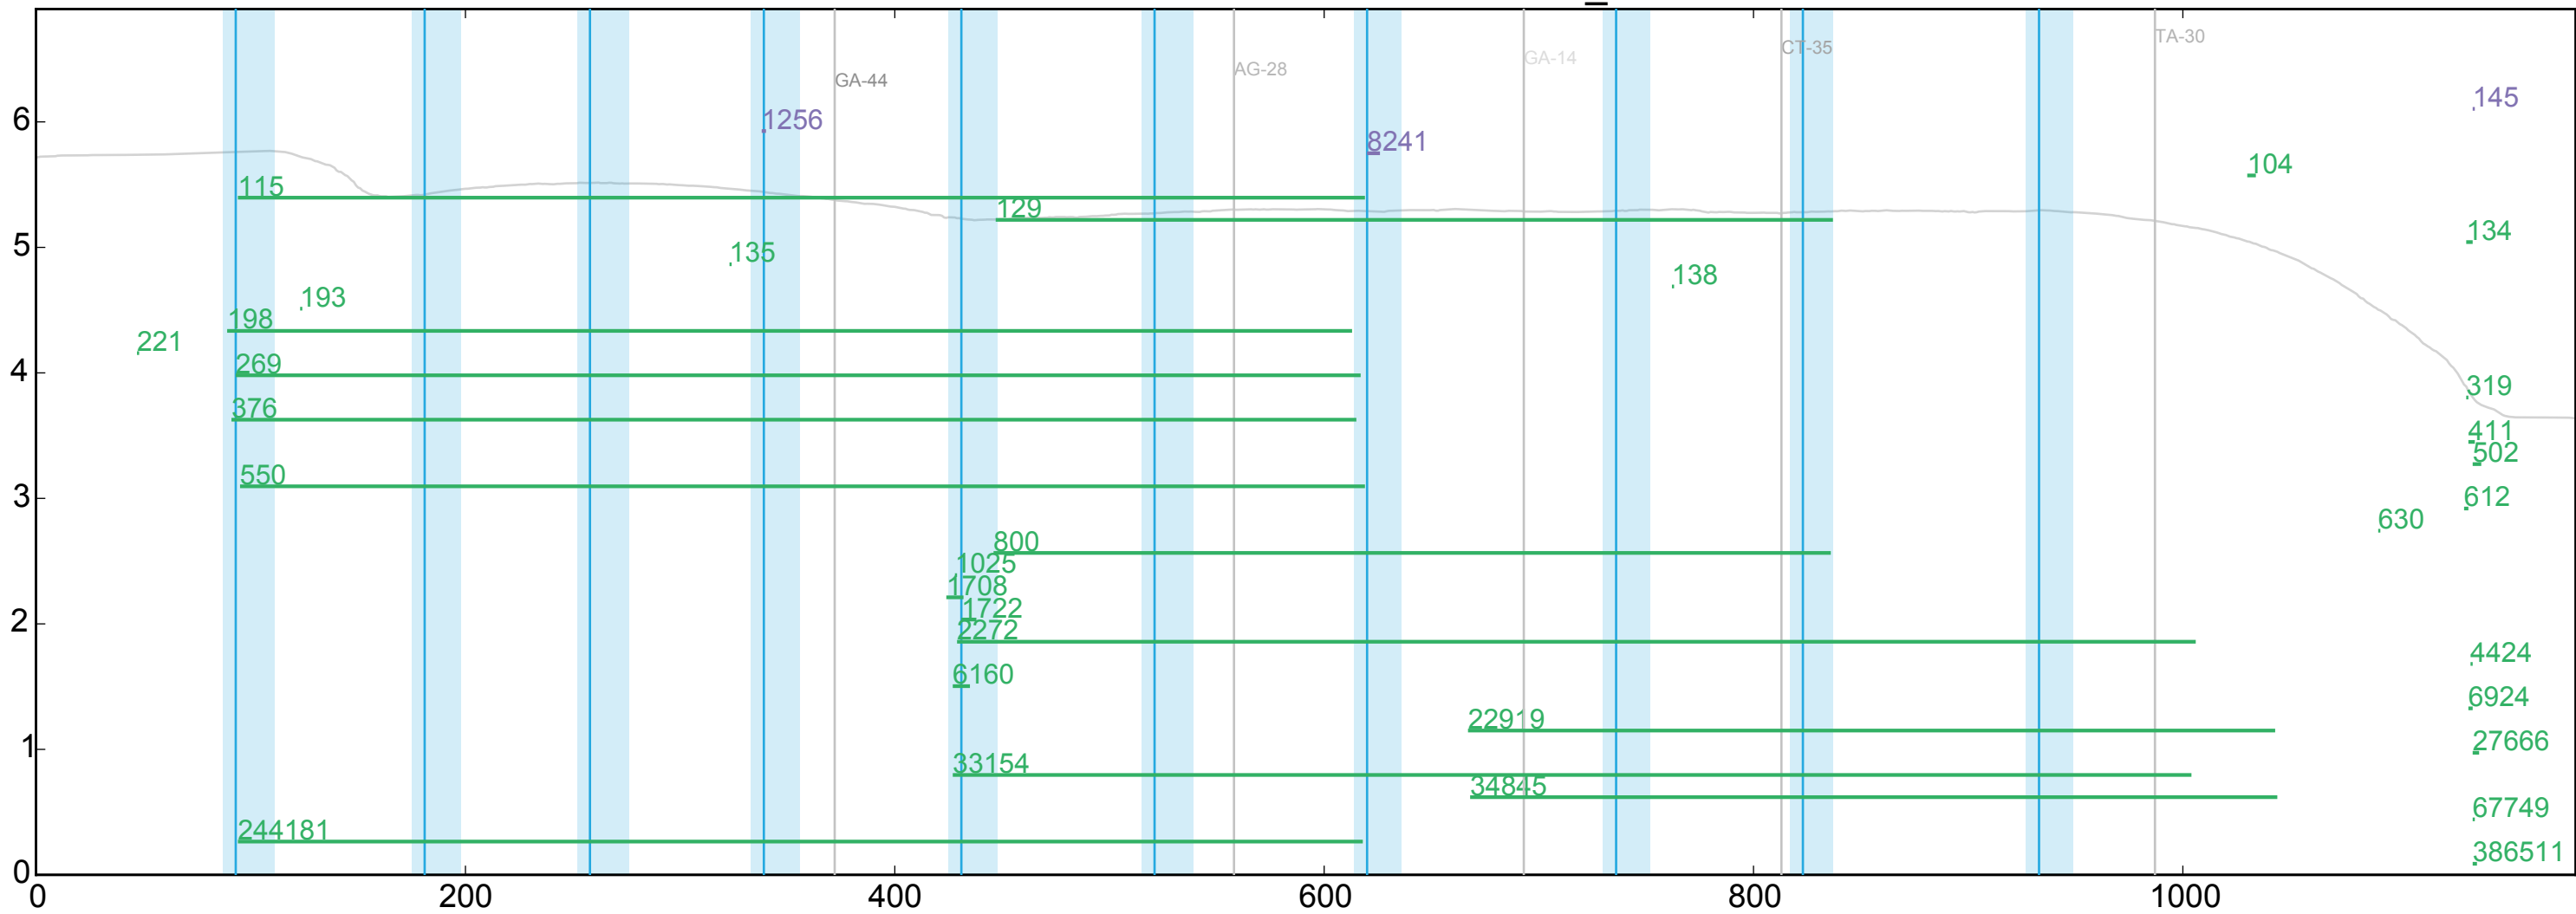

WT ENSDARG00000004473\_5

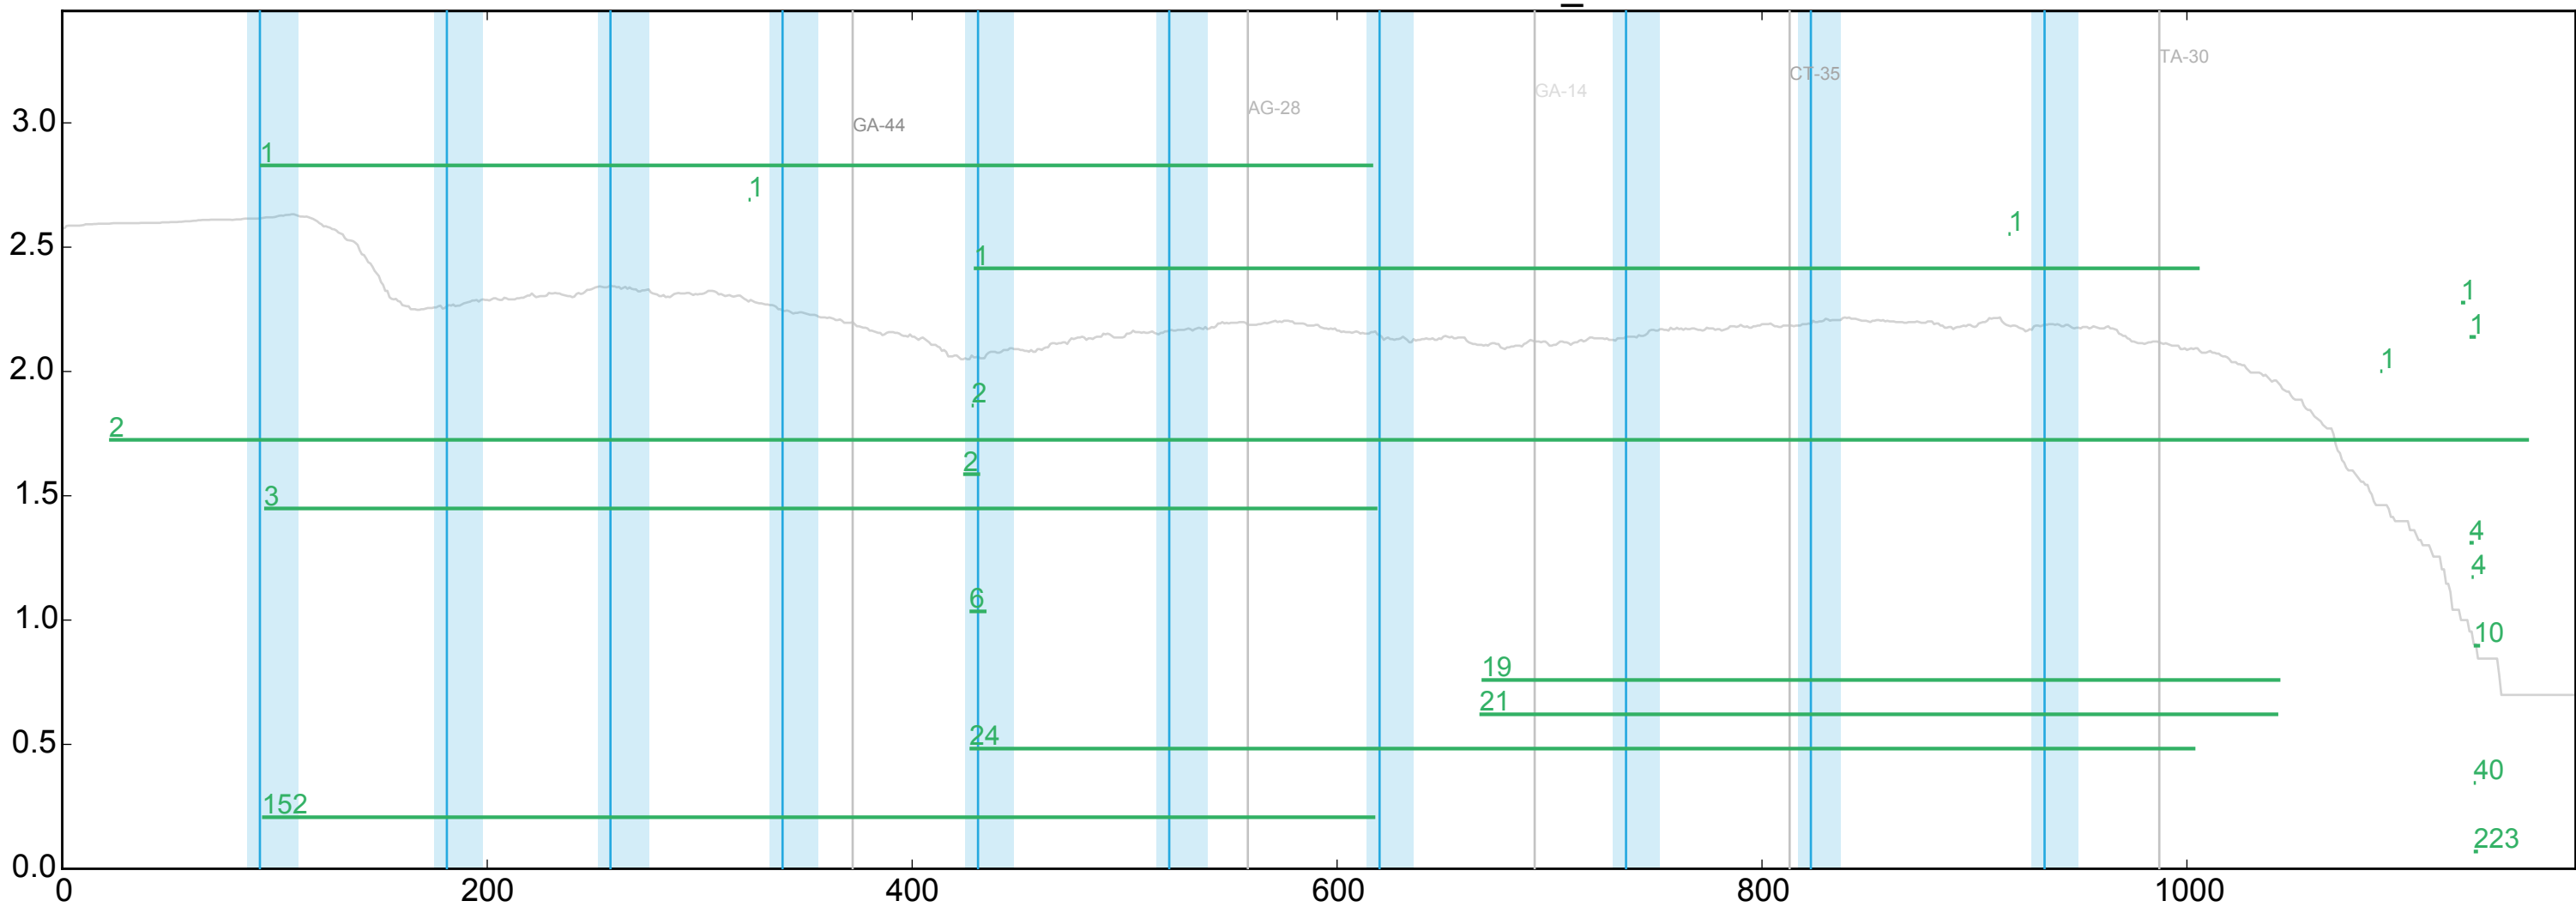

Mutant ENSDARG00000088347\_3

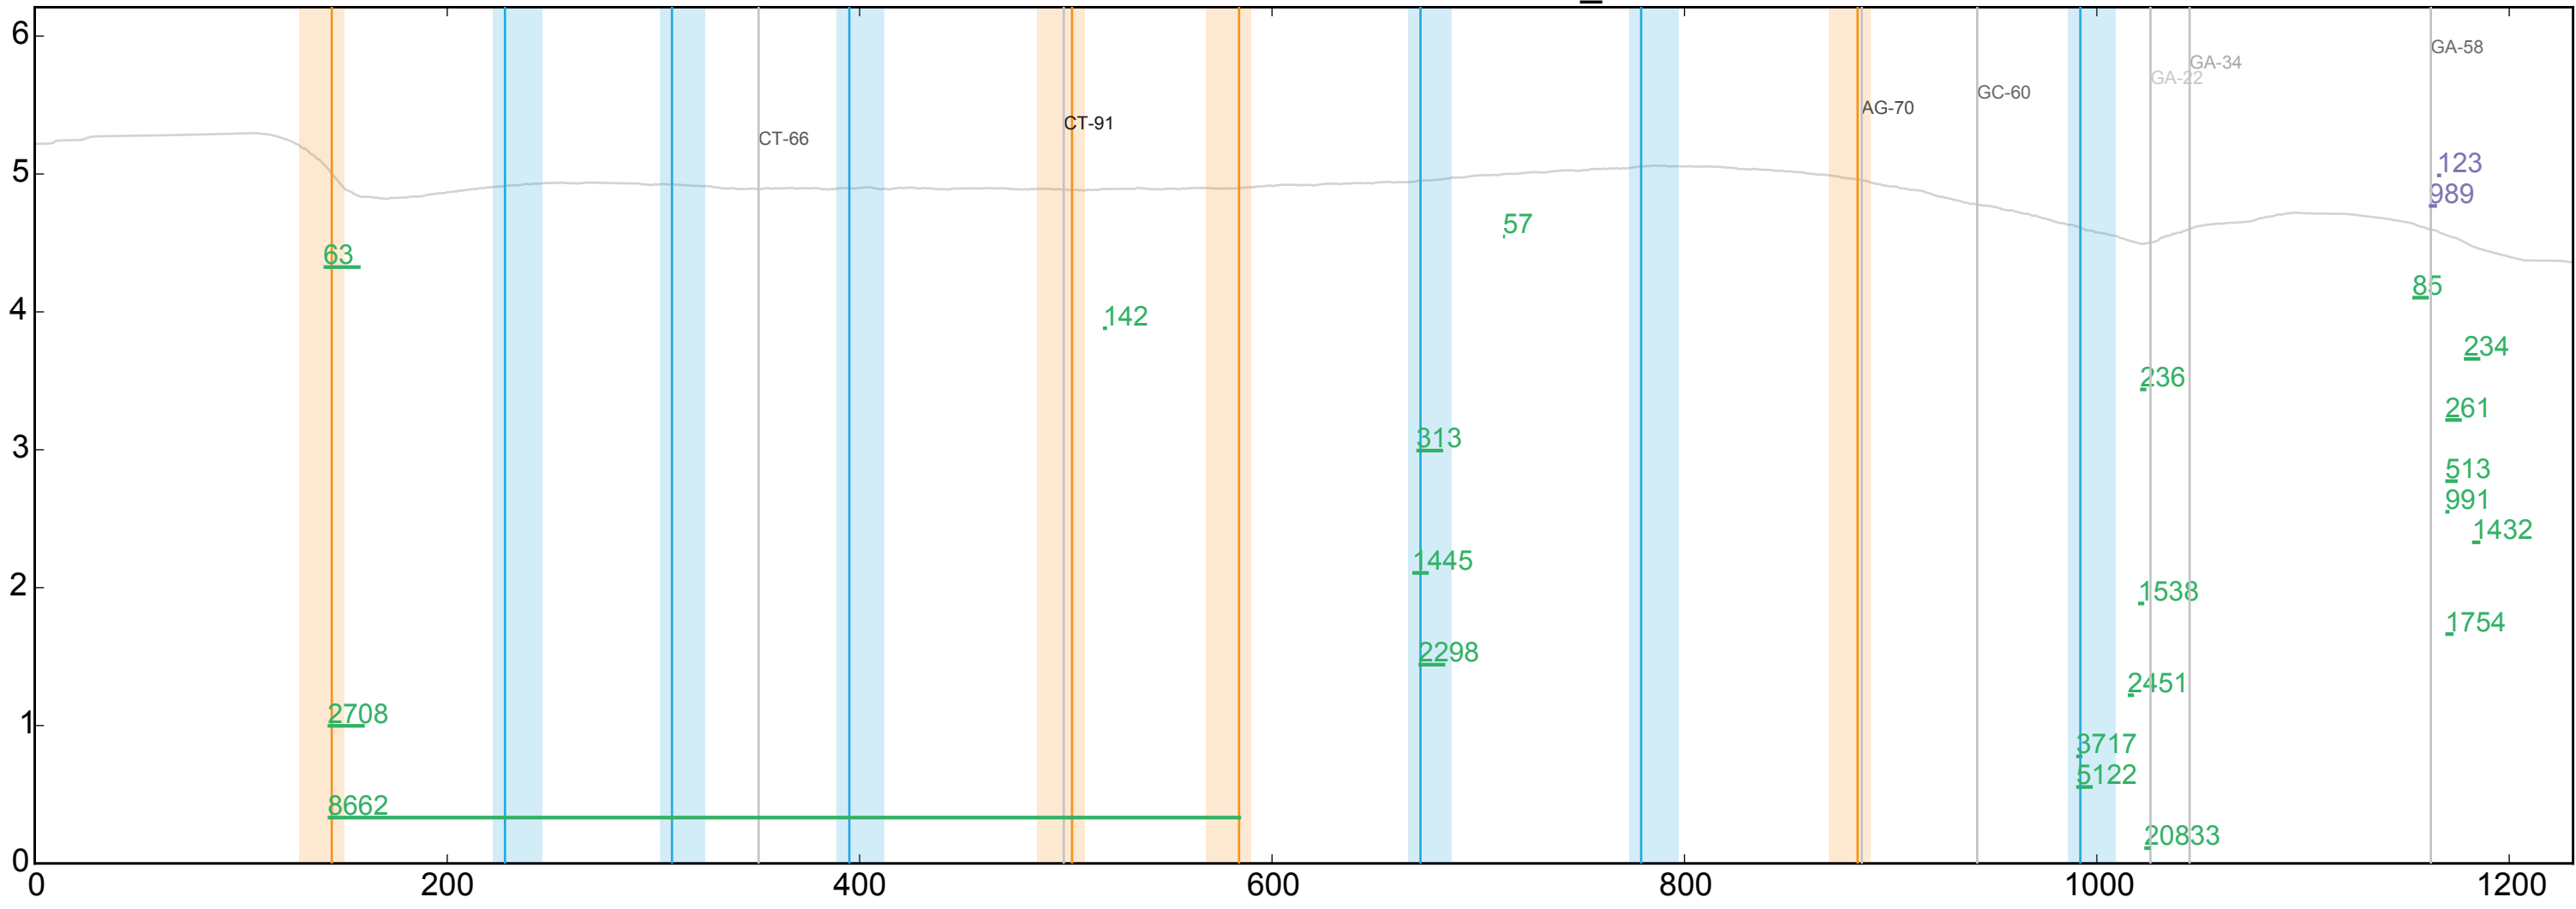

WT ENSDARG00000088347\_3

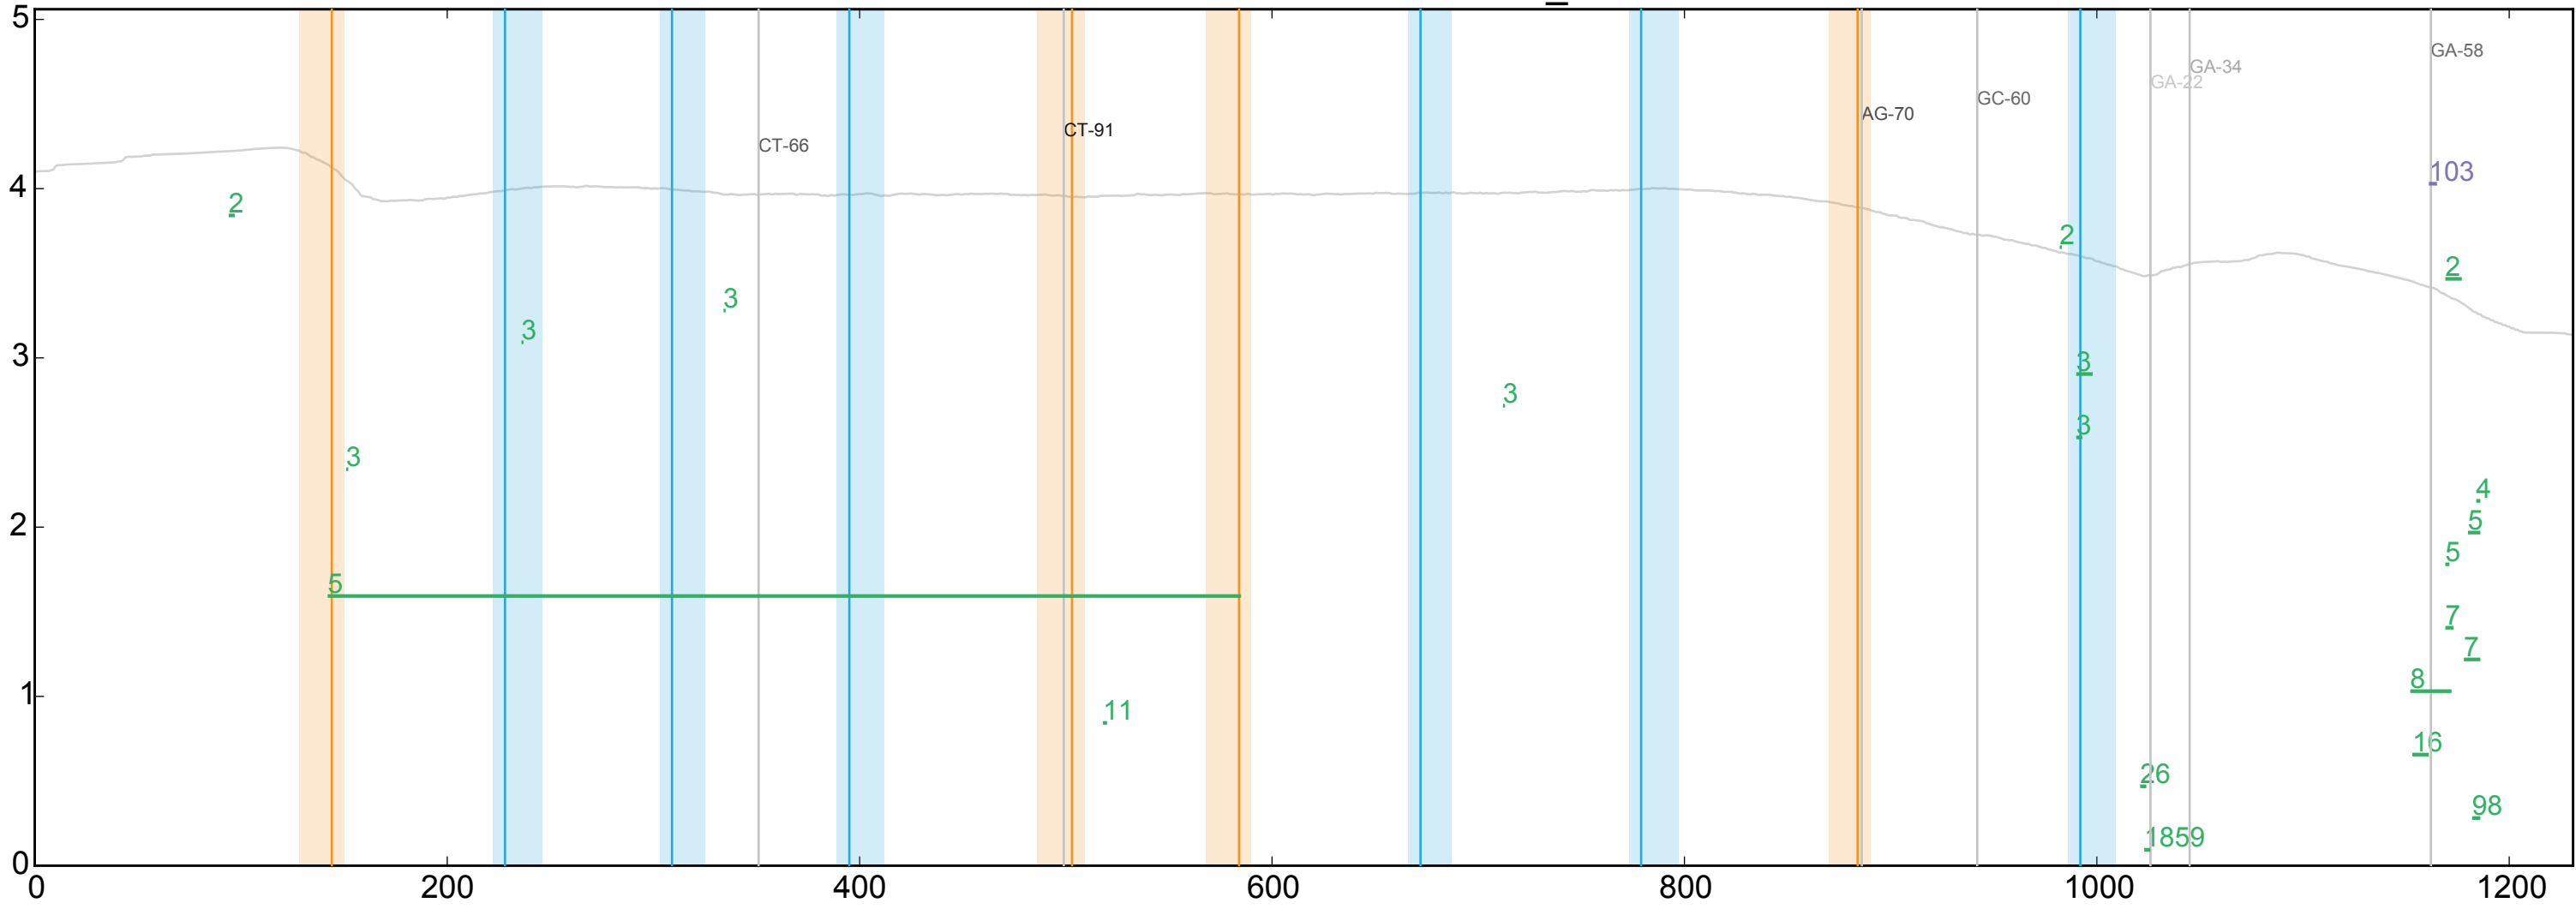

Mutant ENSDARG00000077489\_1

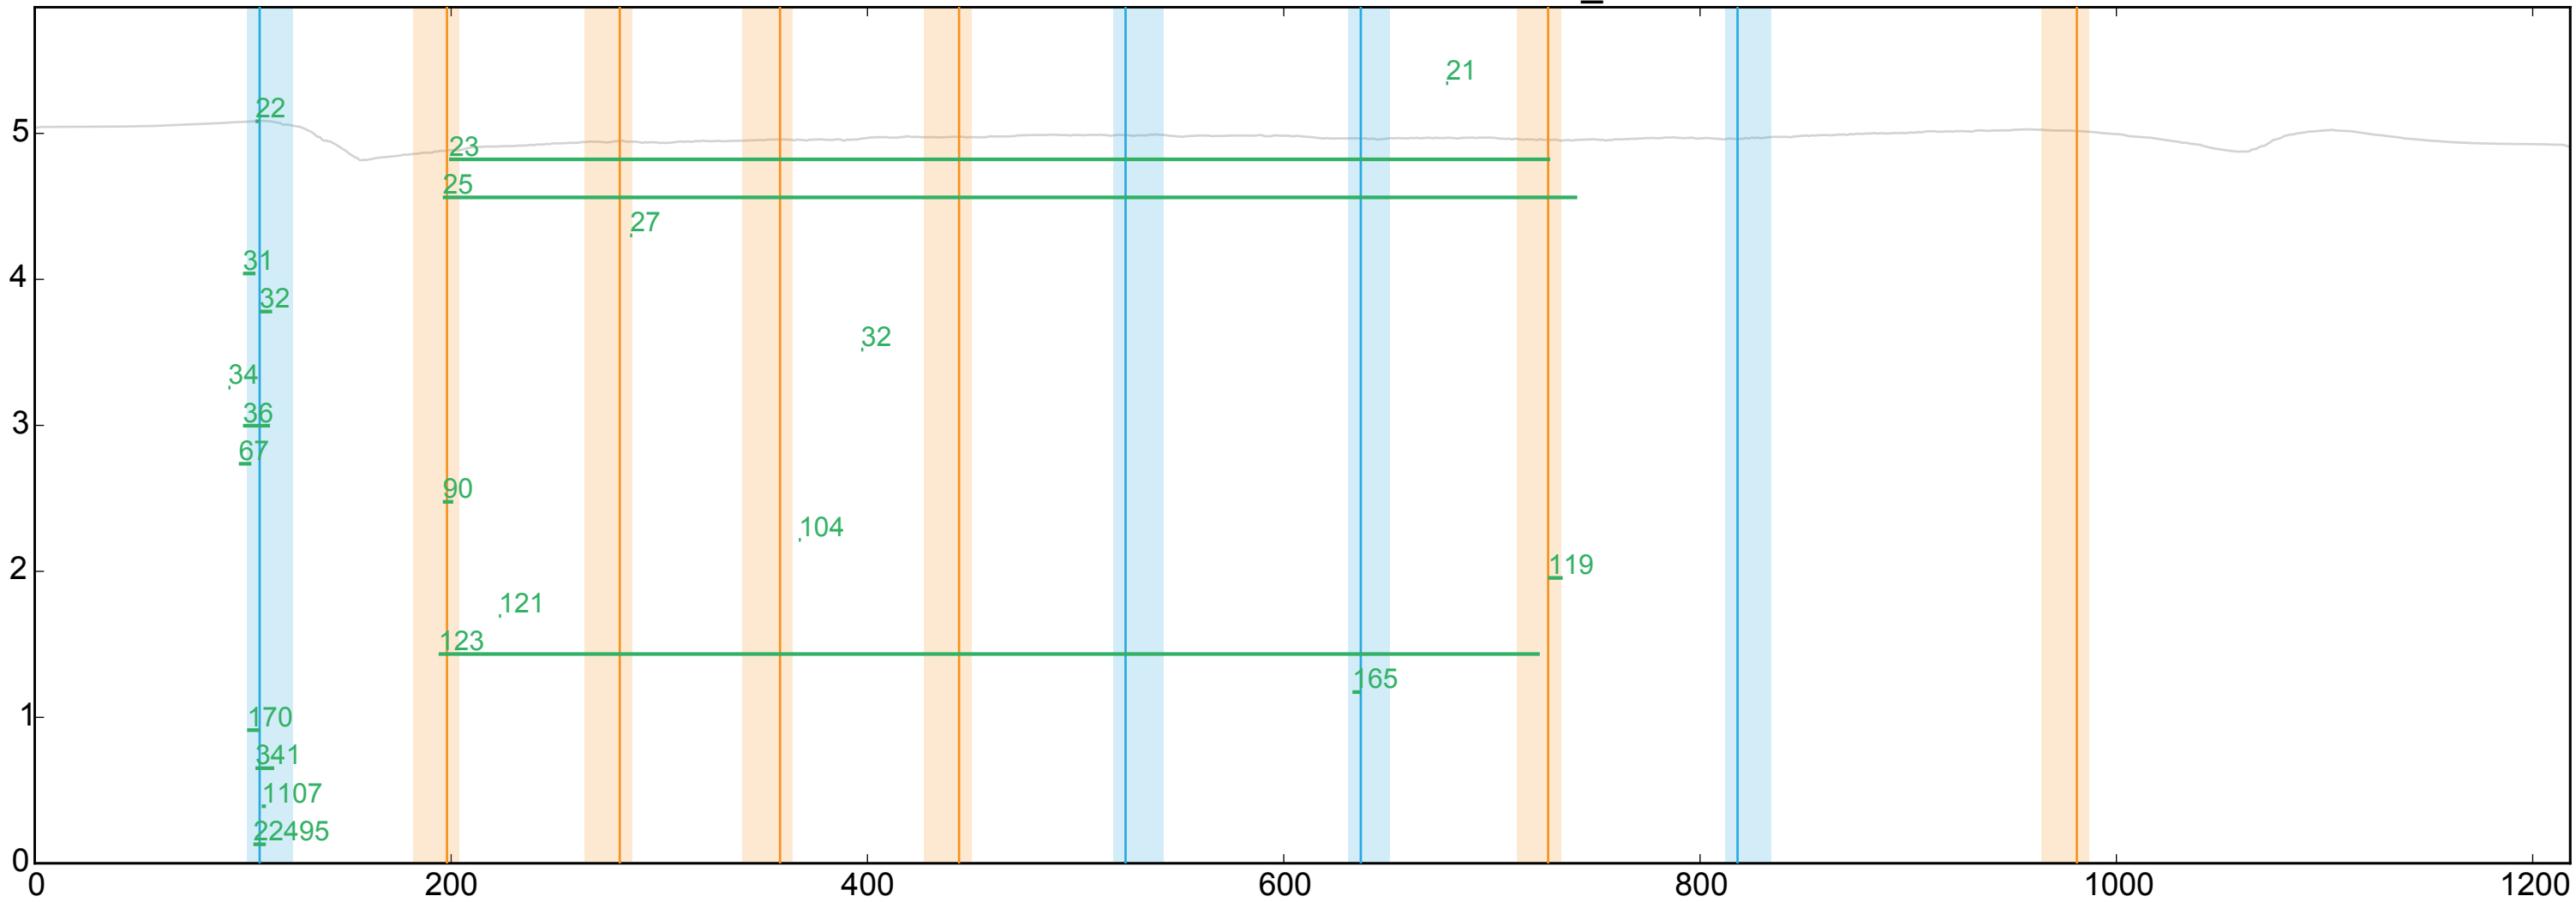

WT ENSDARG00000077489\_1

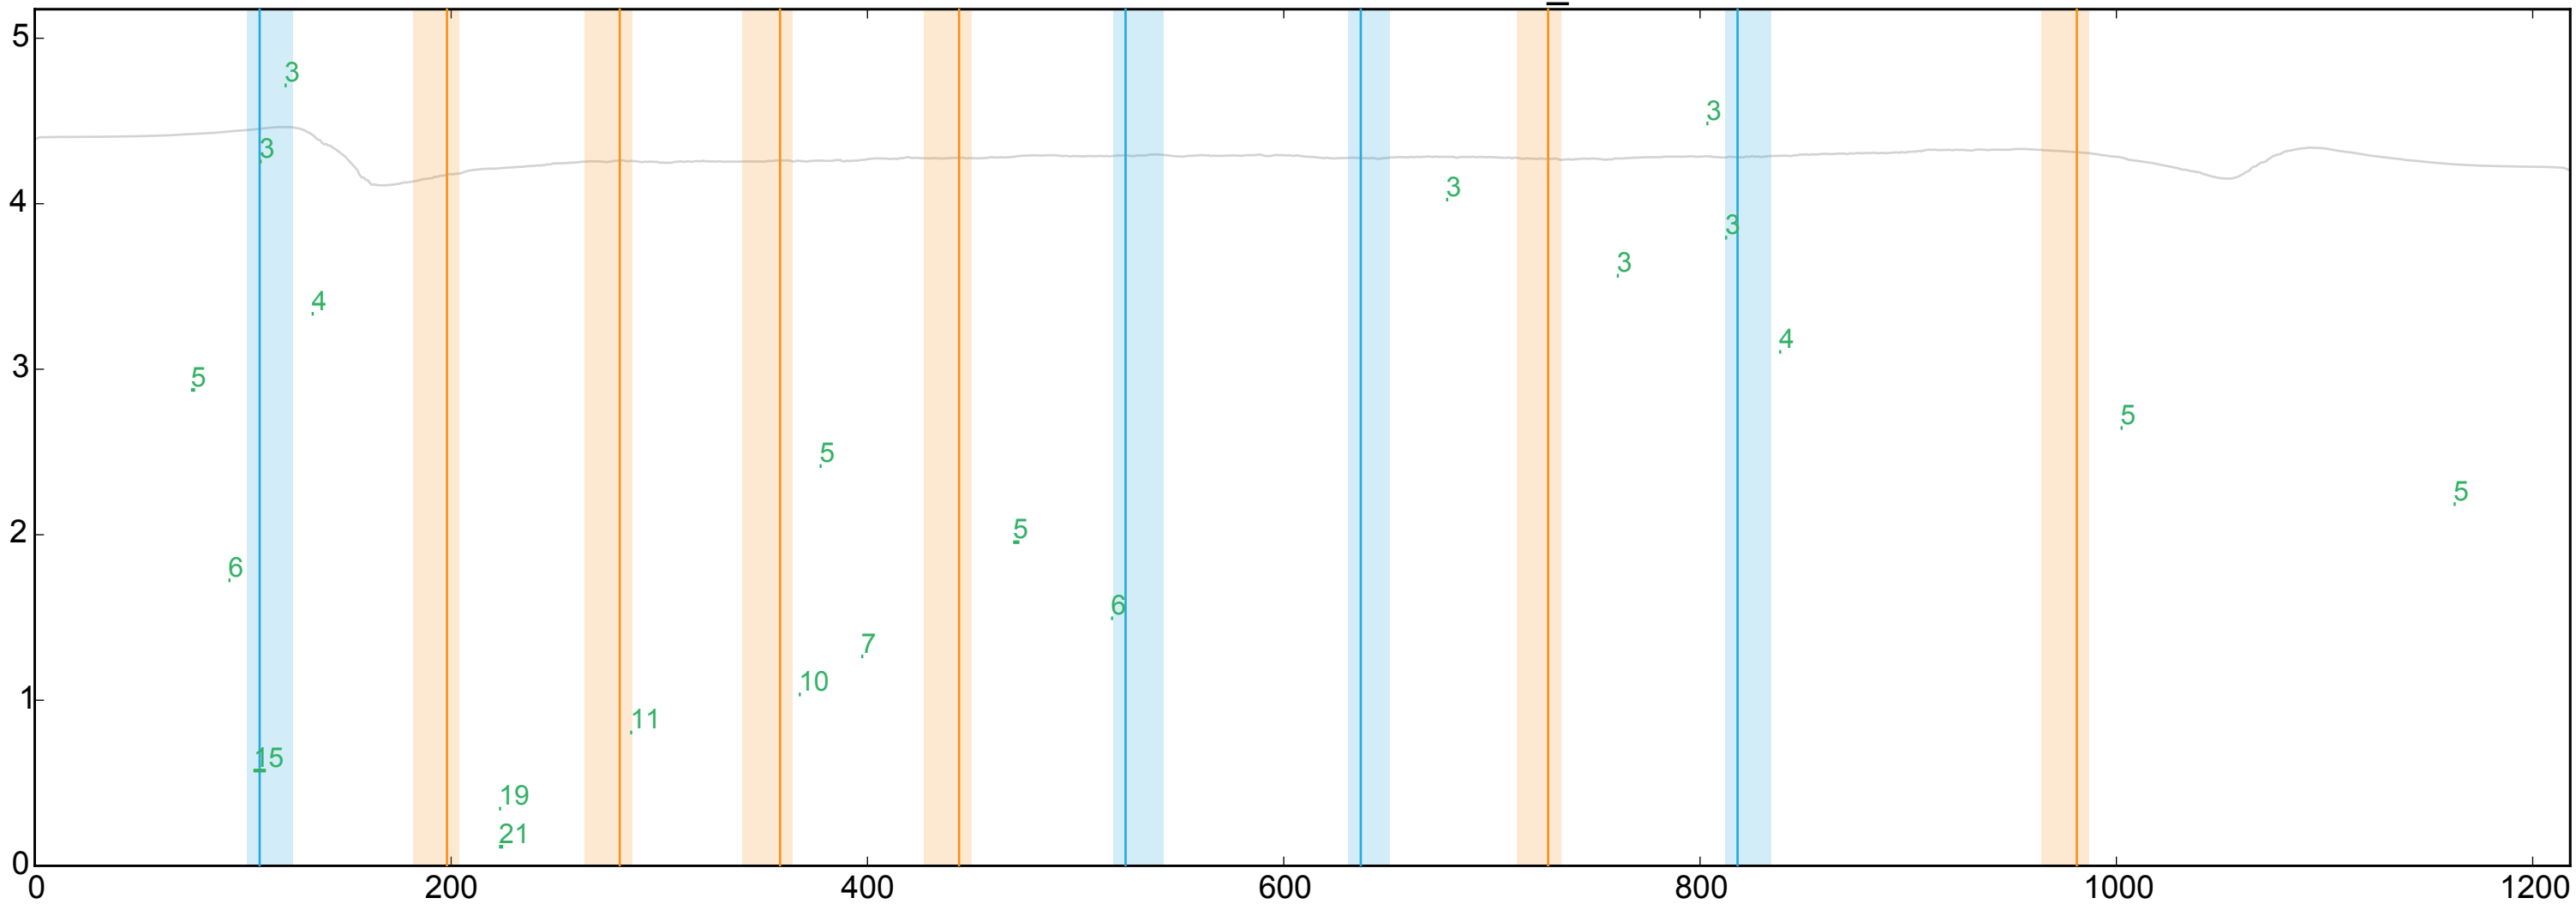

Mutant ENSDARG0000025108\_6

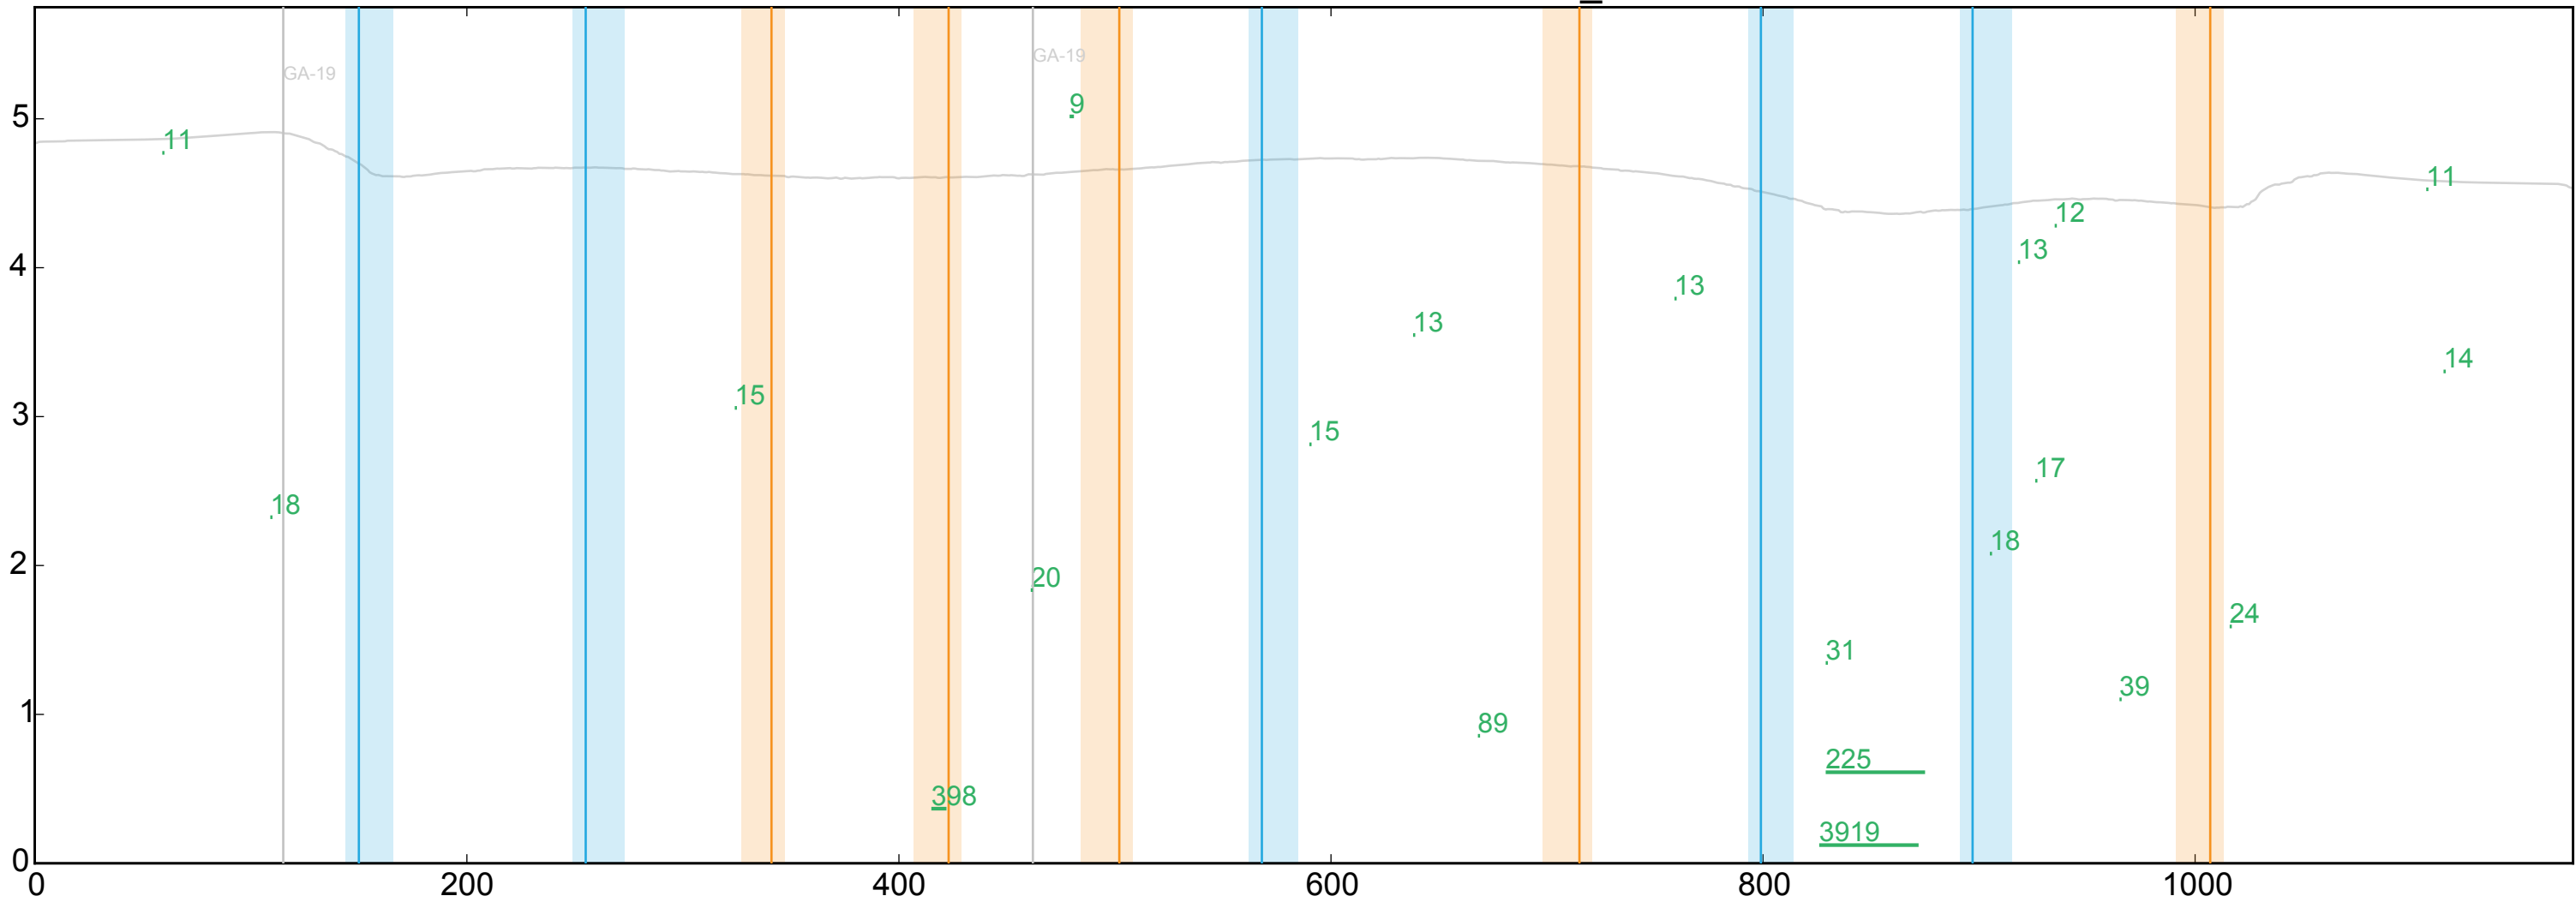

WT ENSDARG0000025108\_6

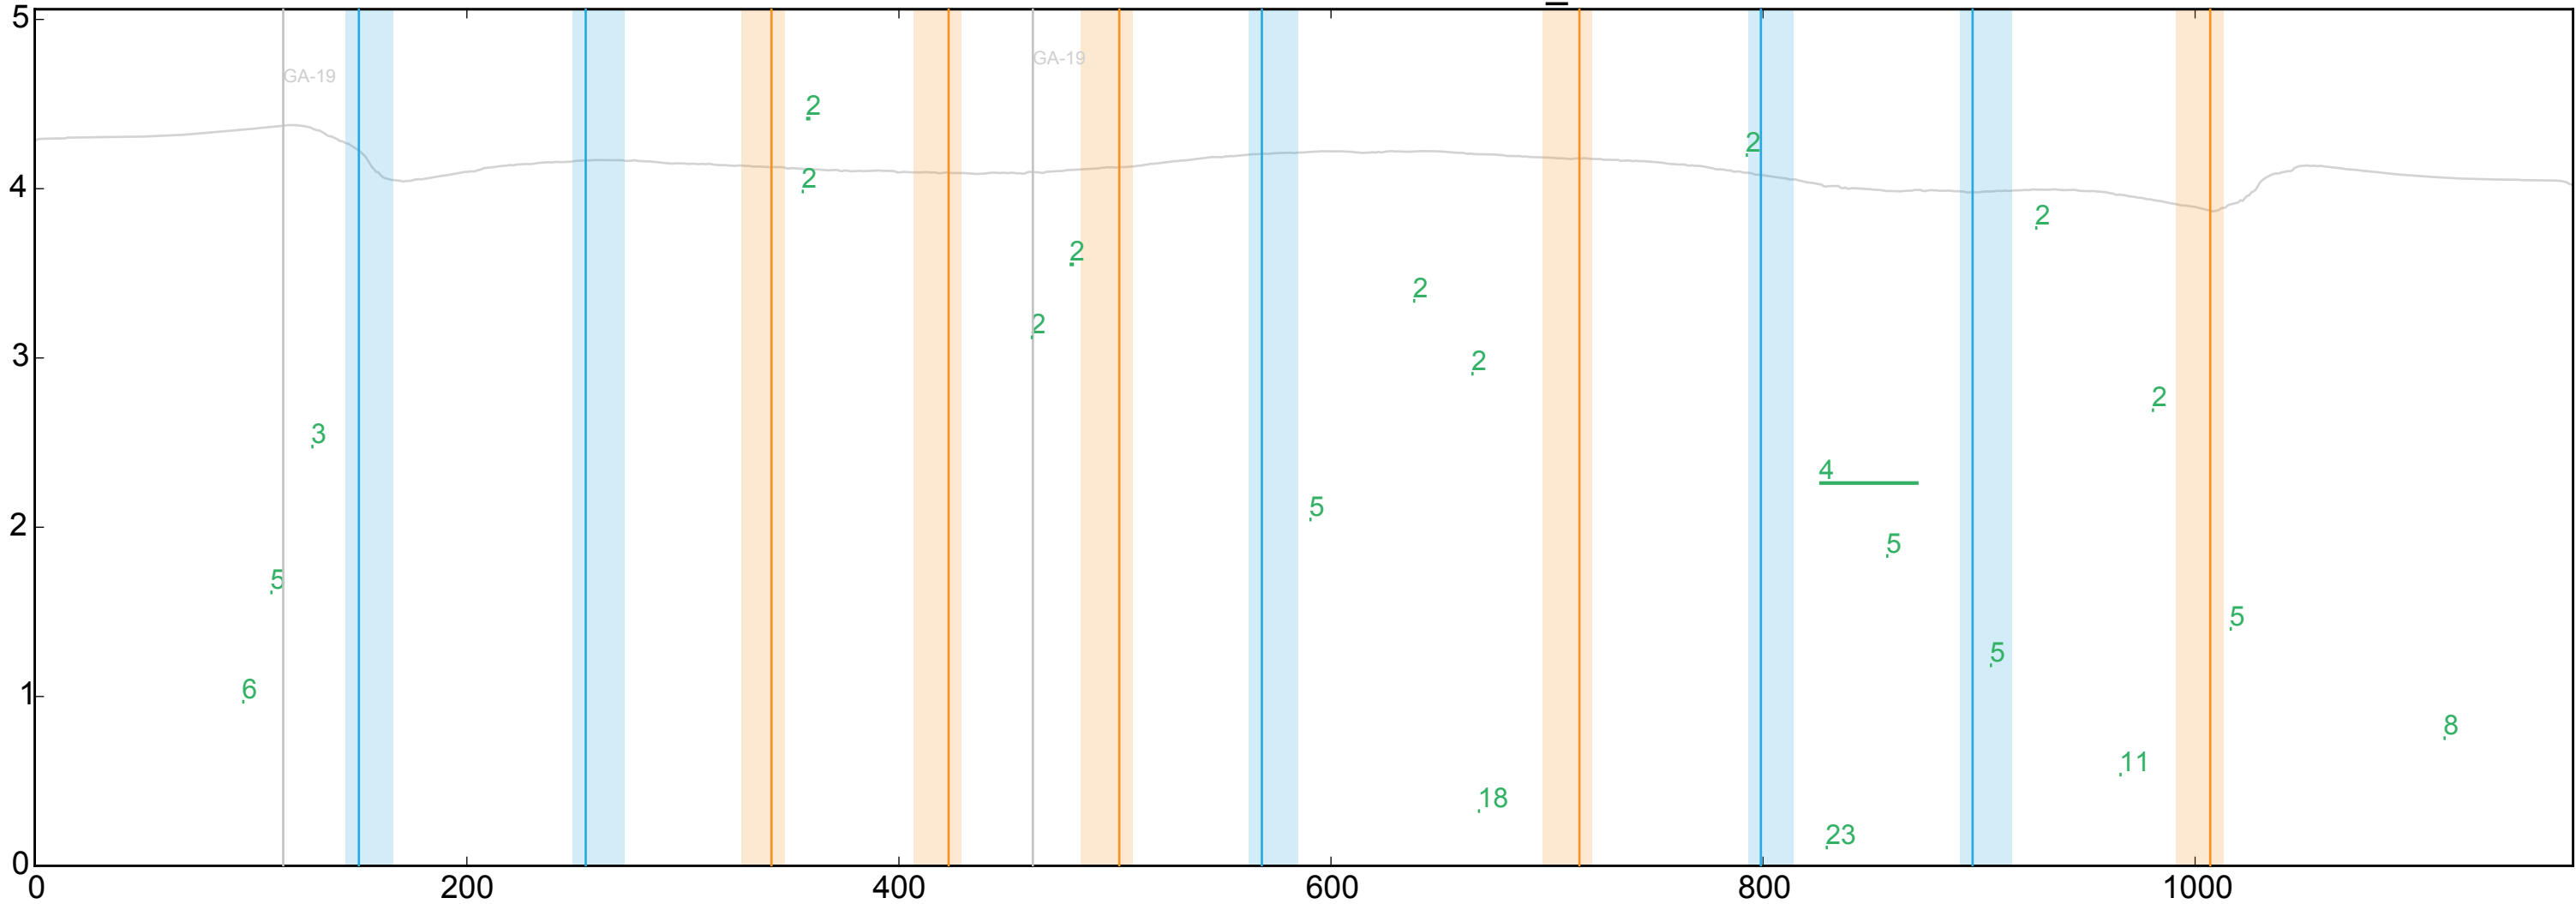



Mutant ENSDARG00000091481\_0

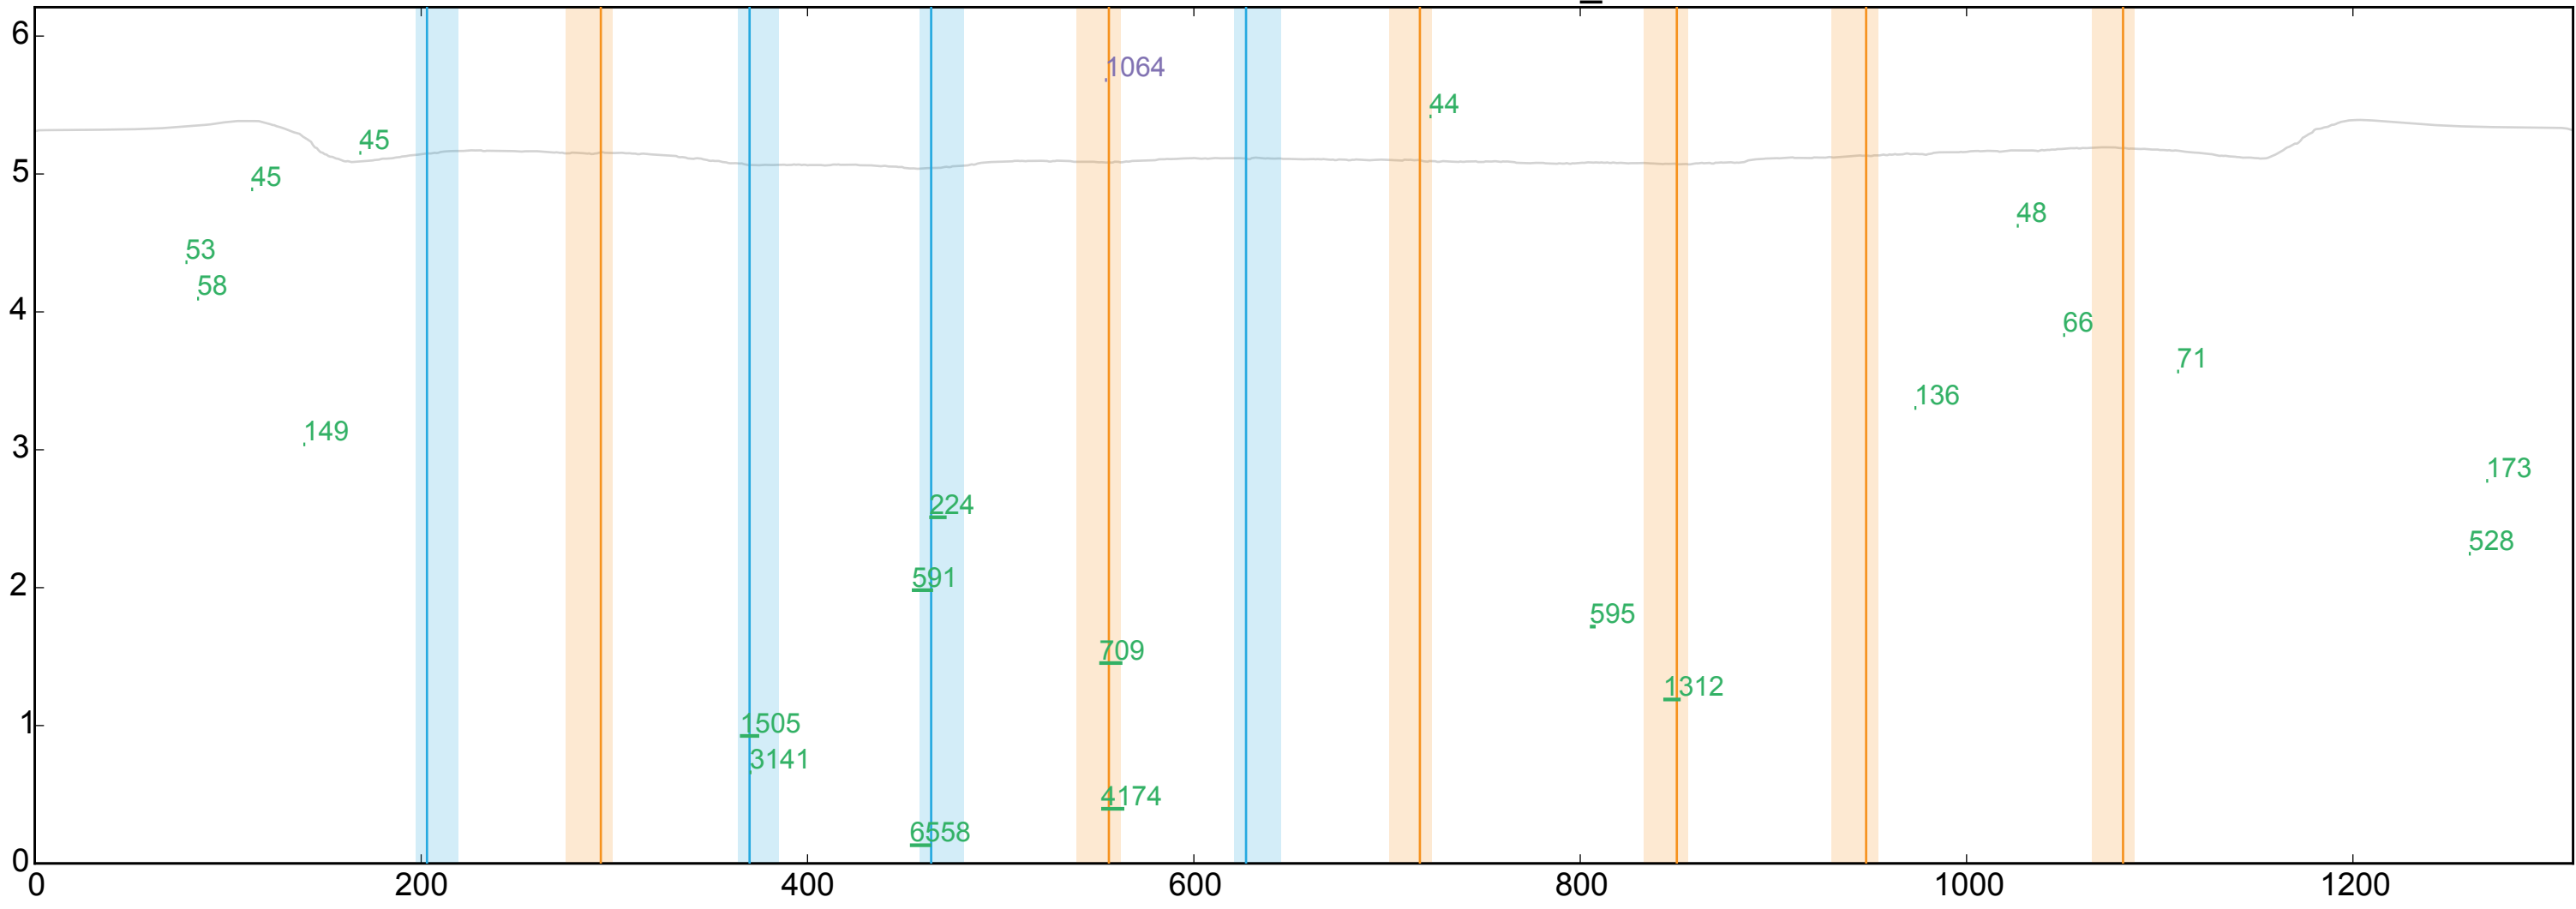

WT ENSDARG00000091481\_0

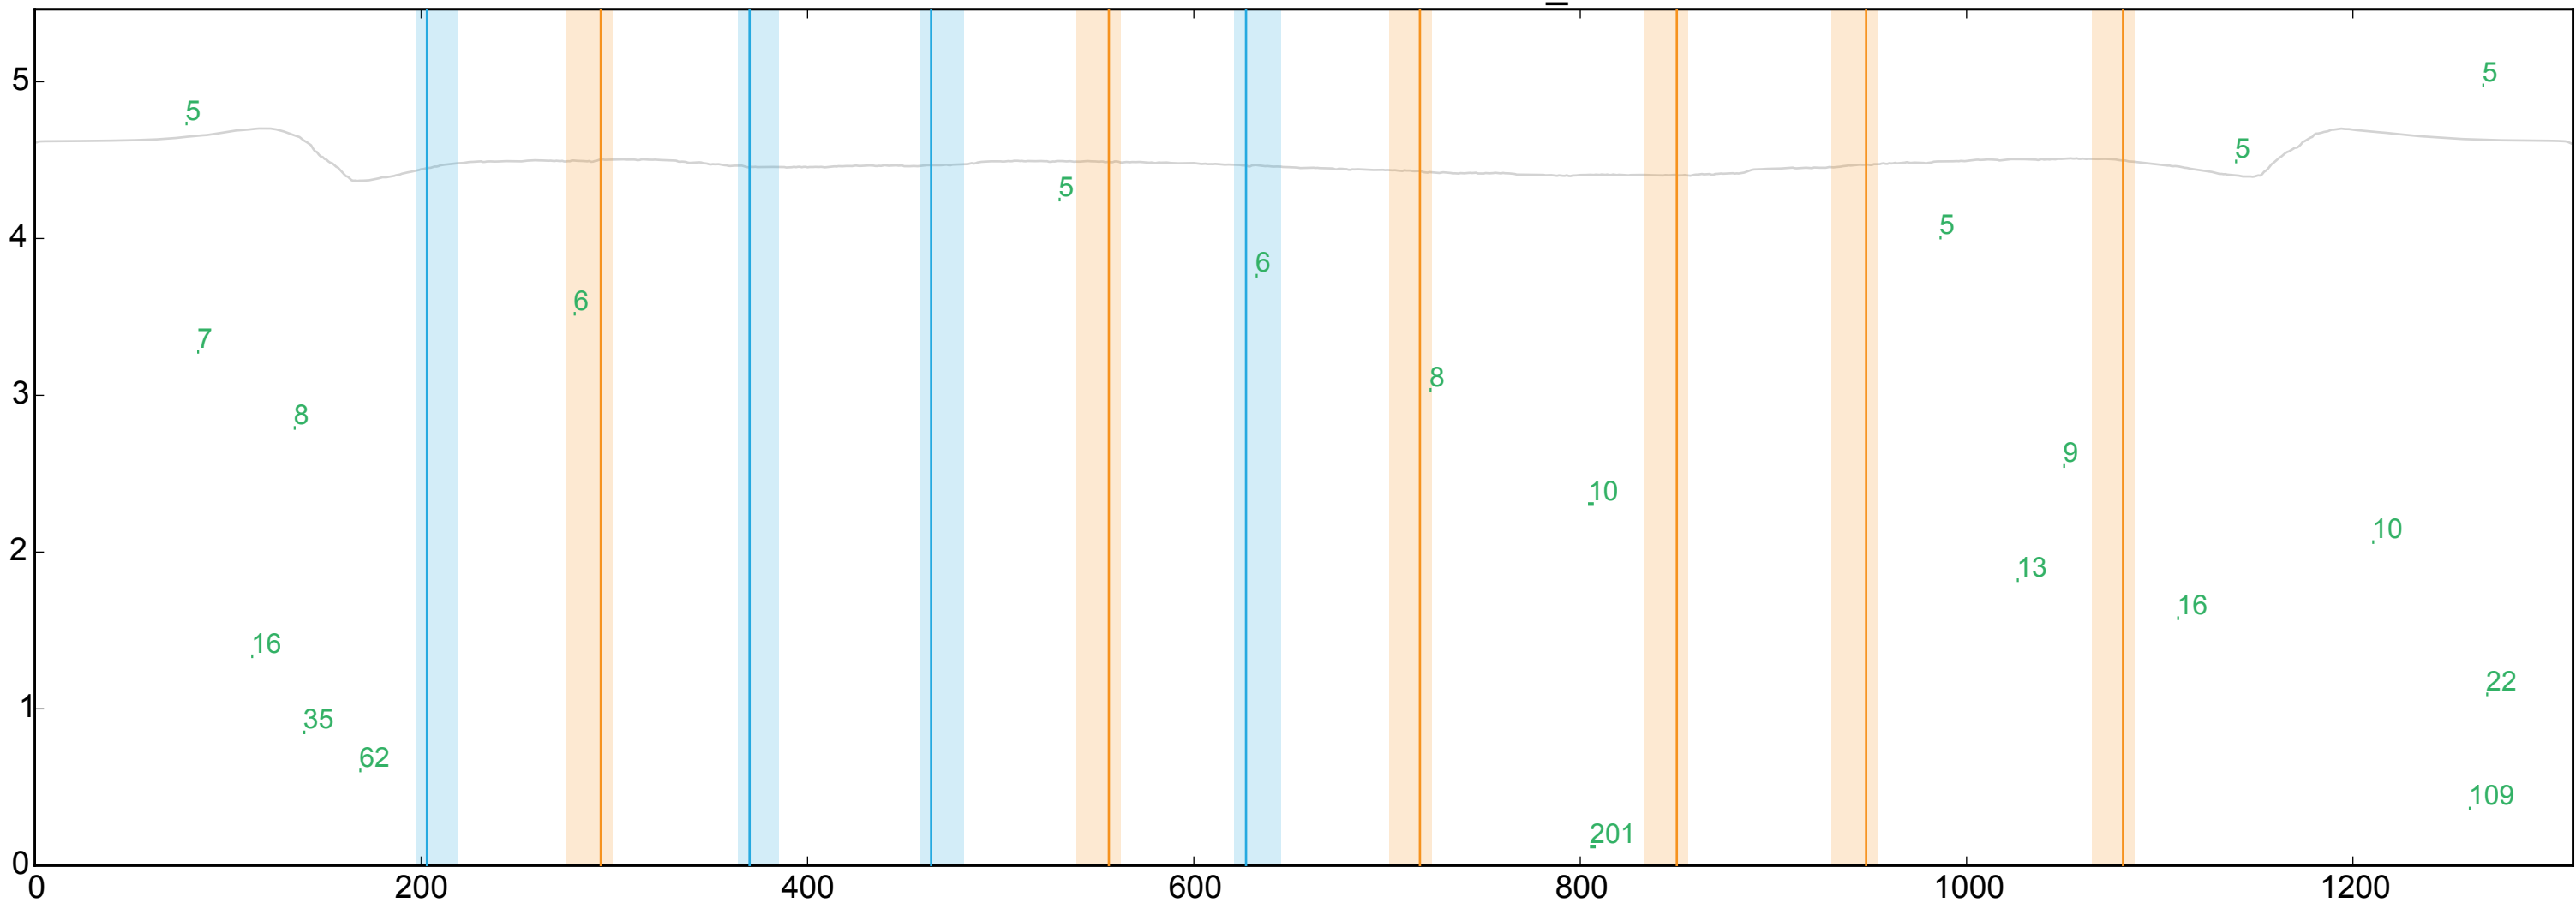

Mutant ENSDARG0000055054\_0

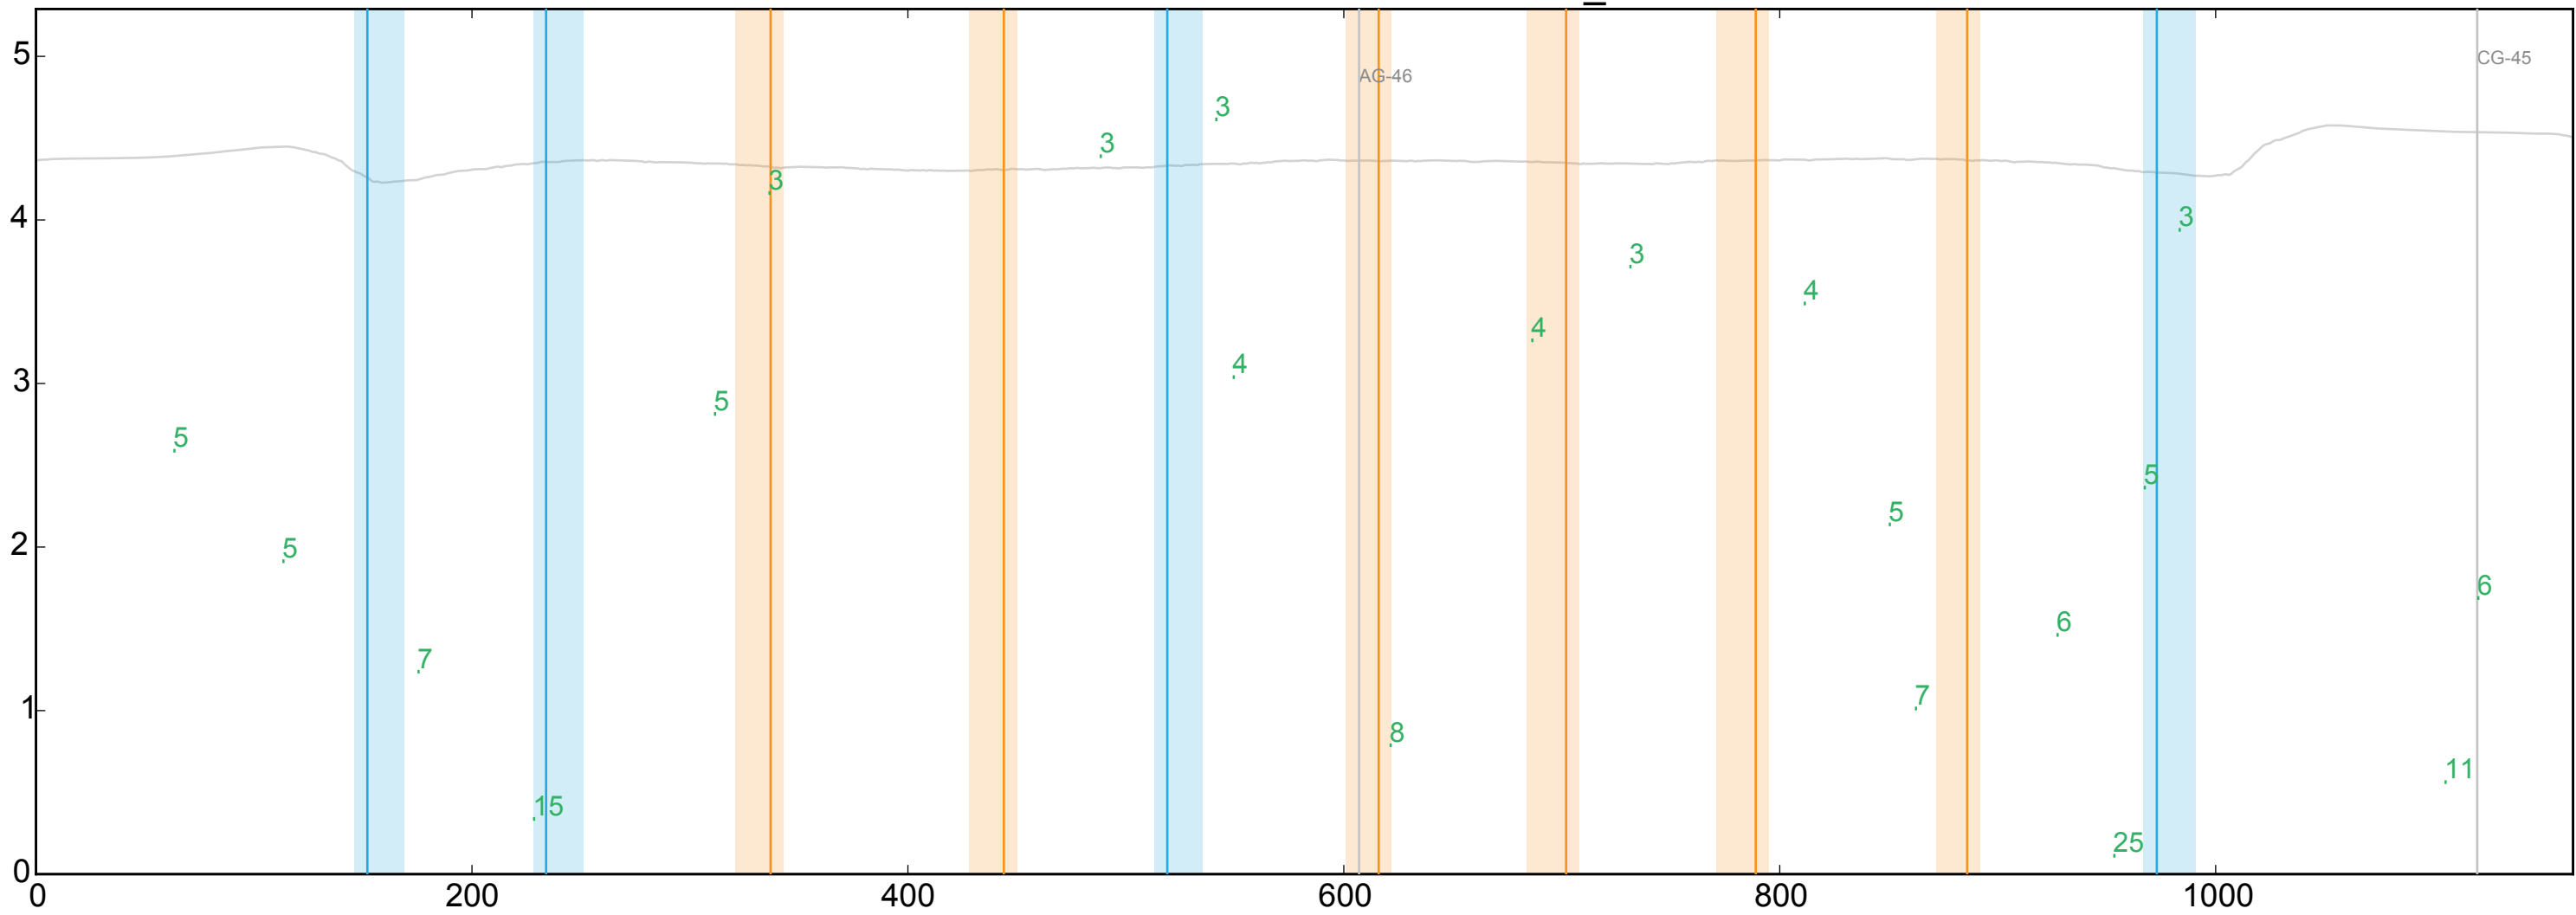

WT ENSDARG0000055054\_0

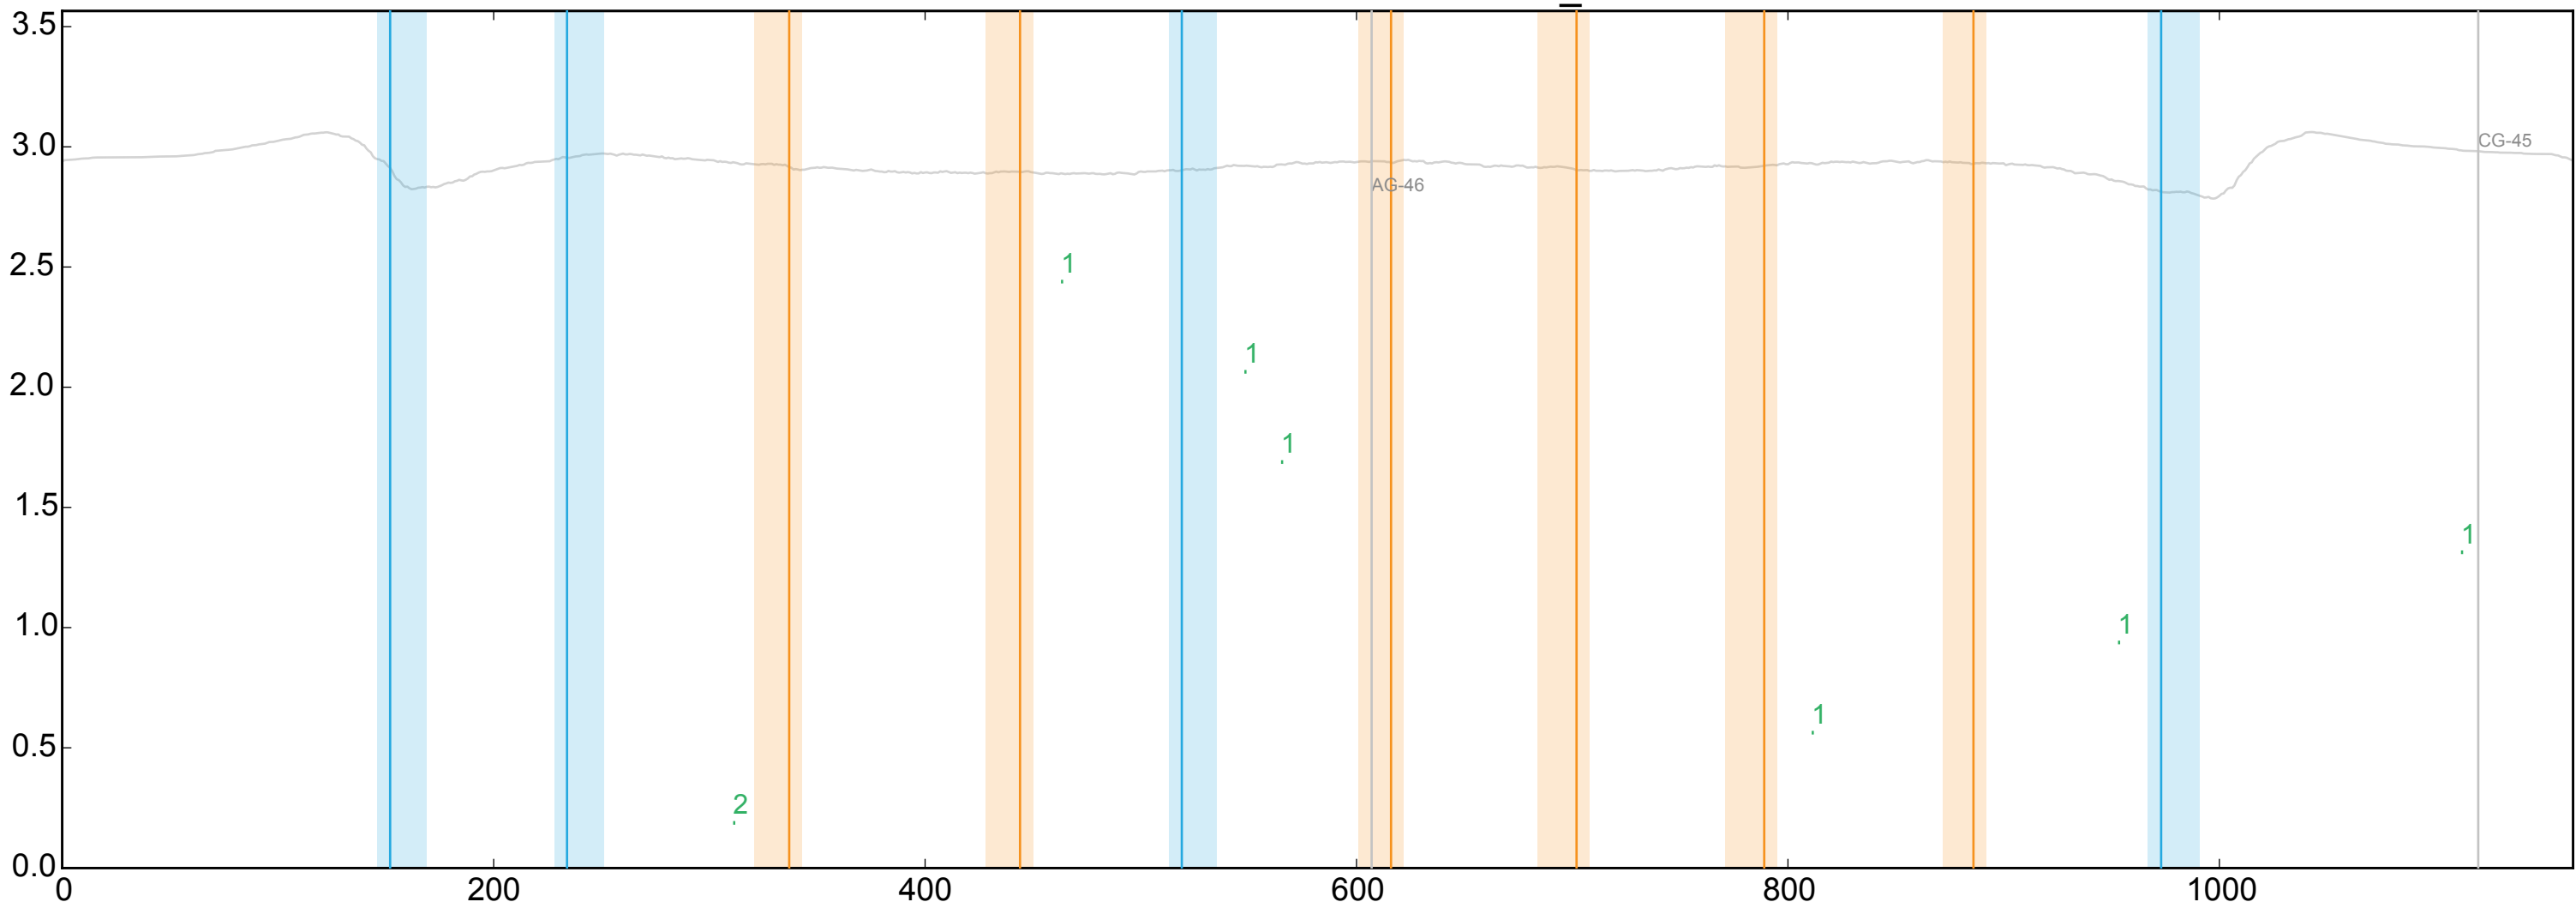

Mutant ENSDARG00000076485\_12

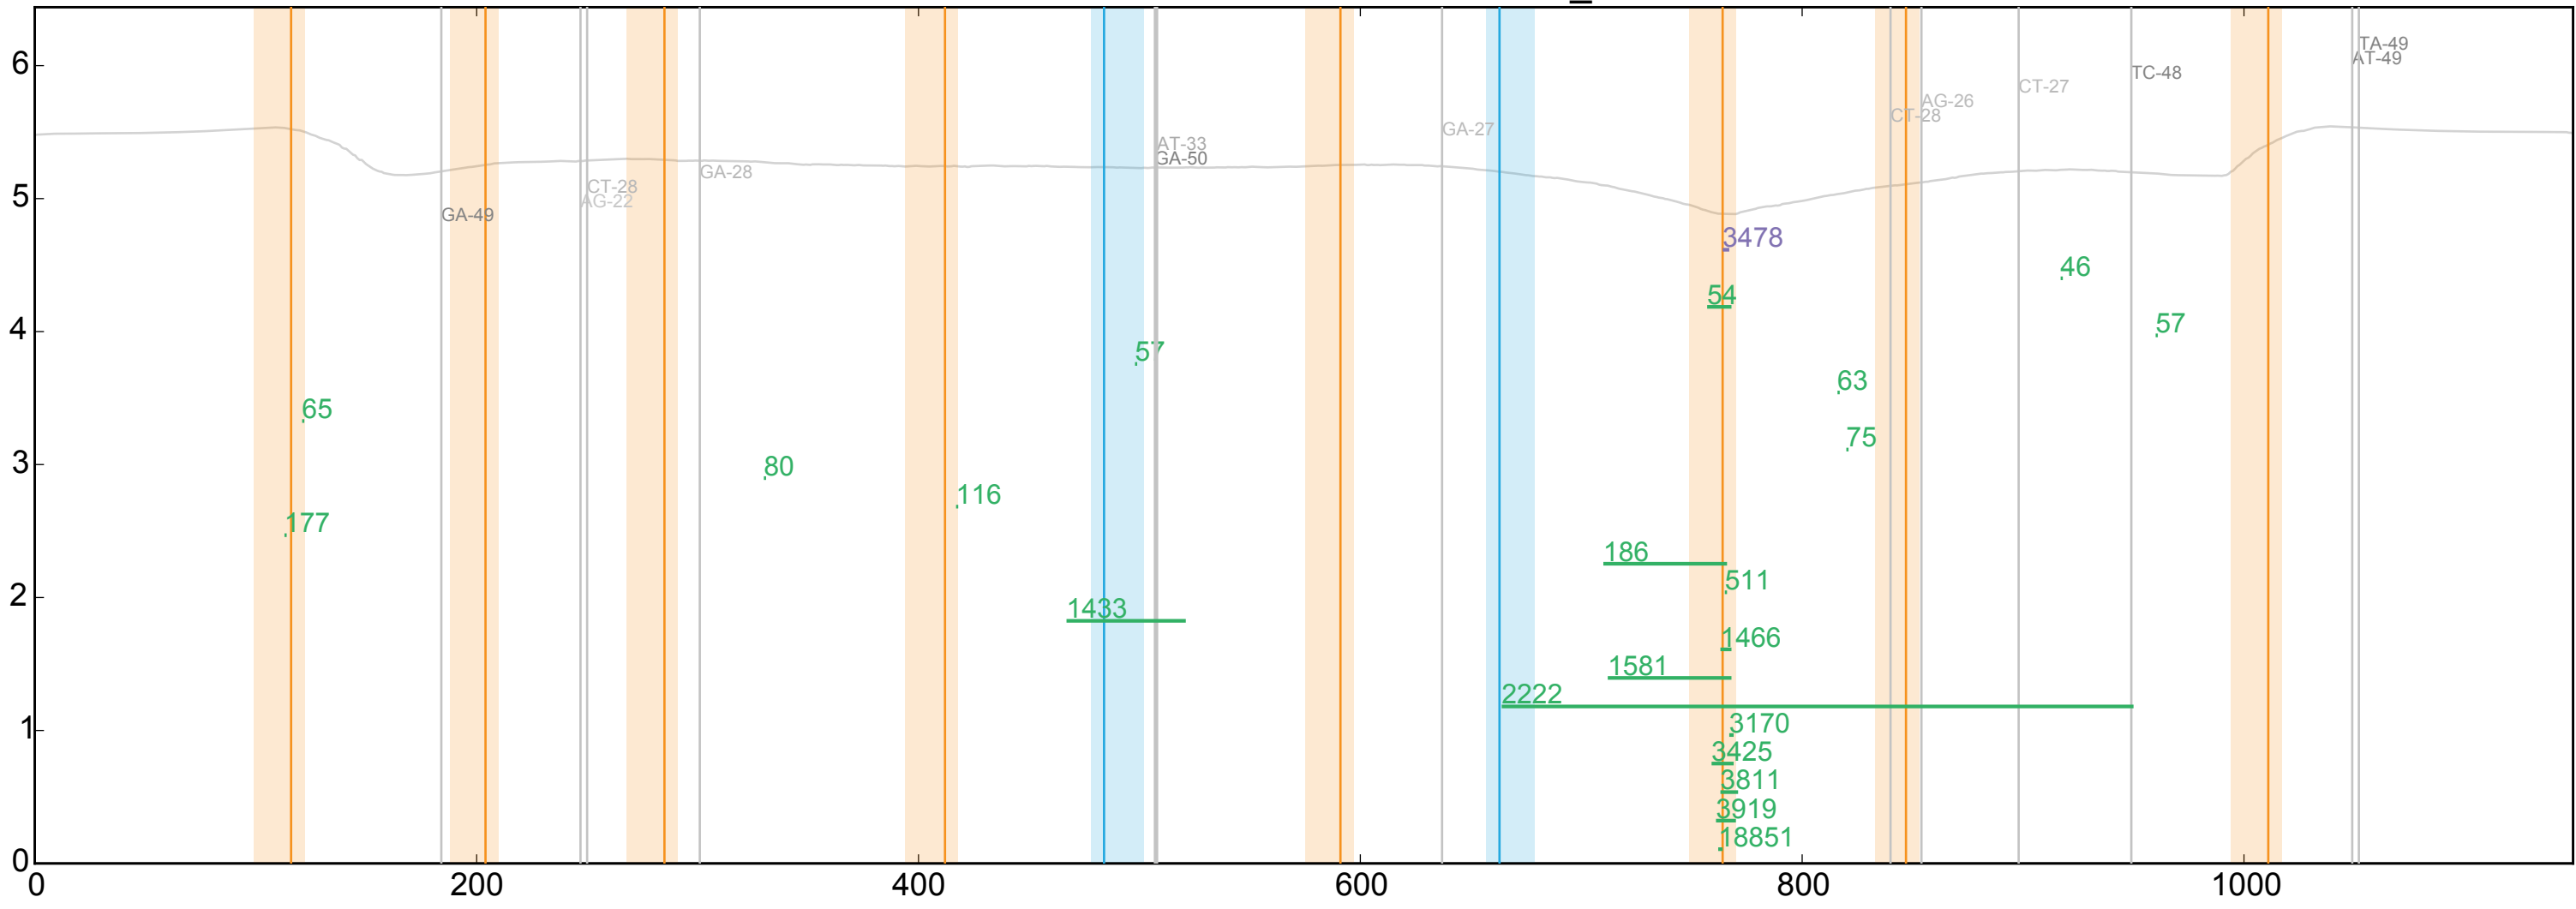

WT ENSDARG00000076485\_12

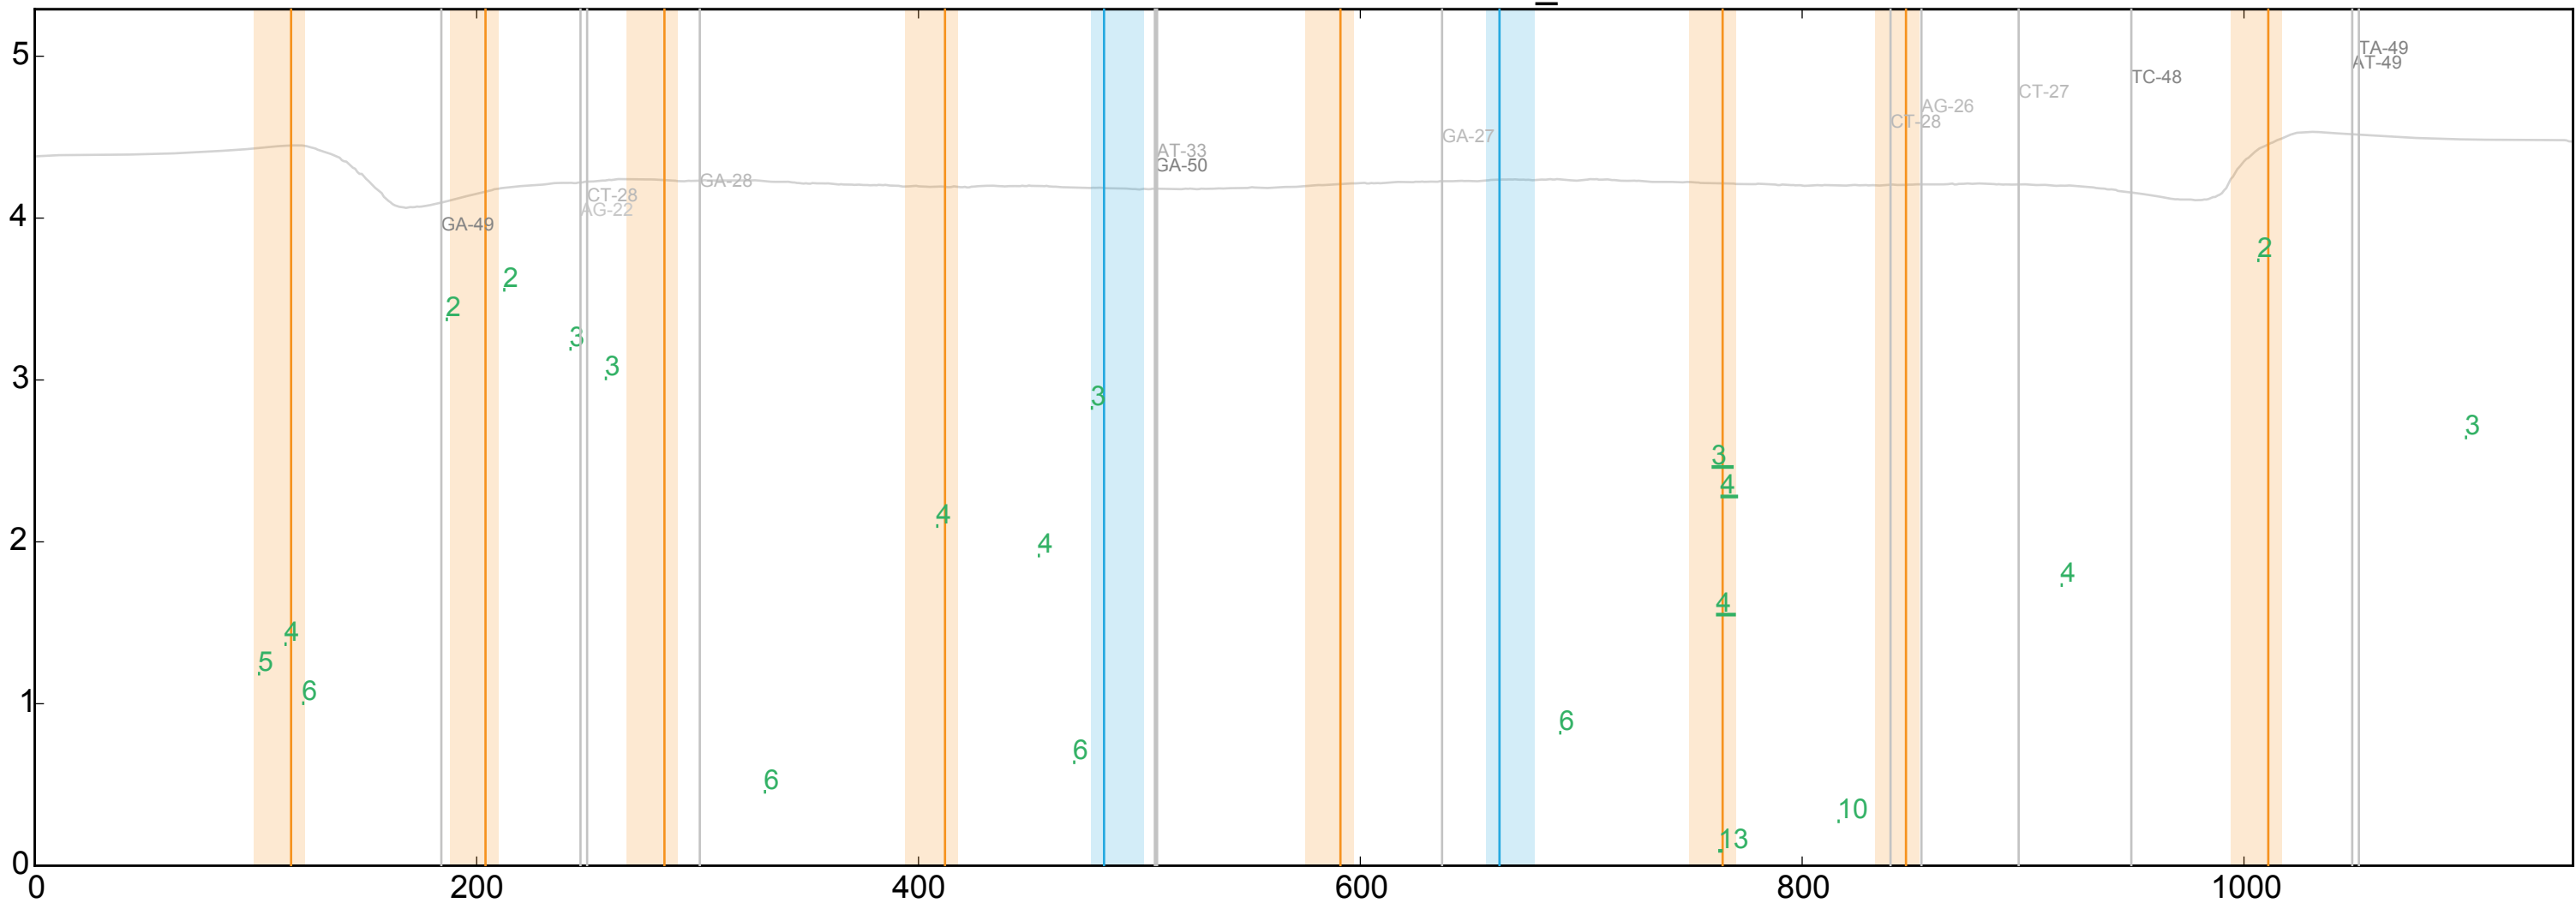



Mutant ENSDARG00000086551\_1

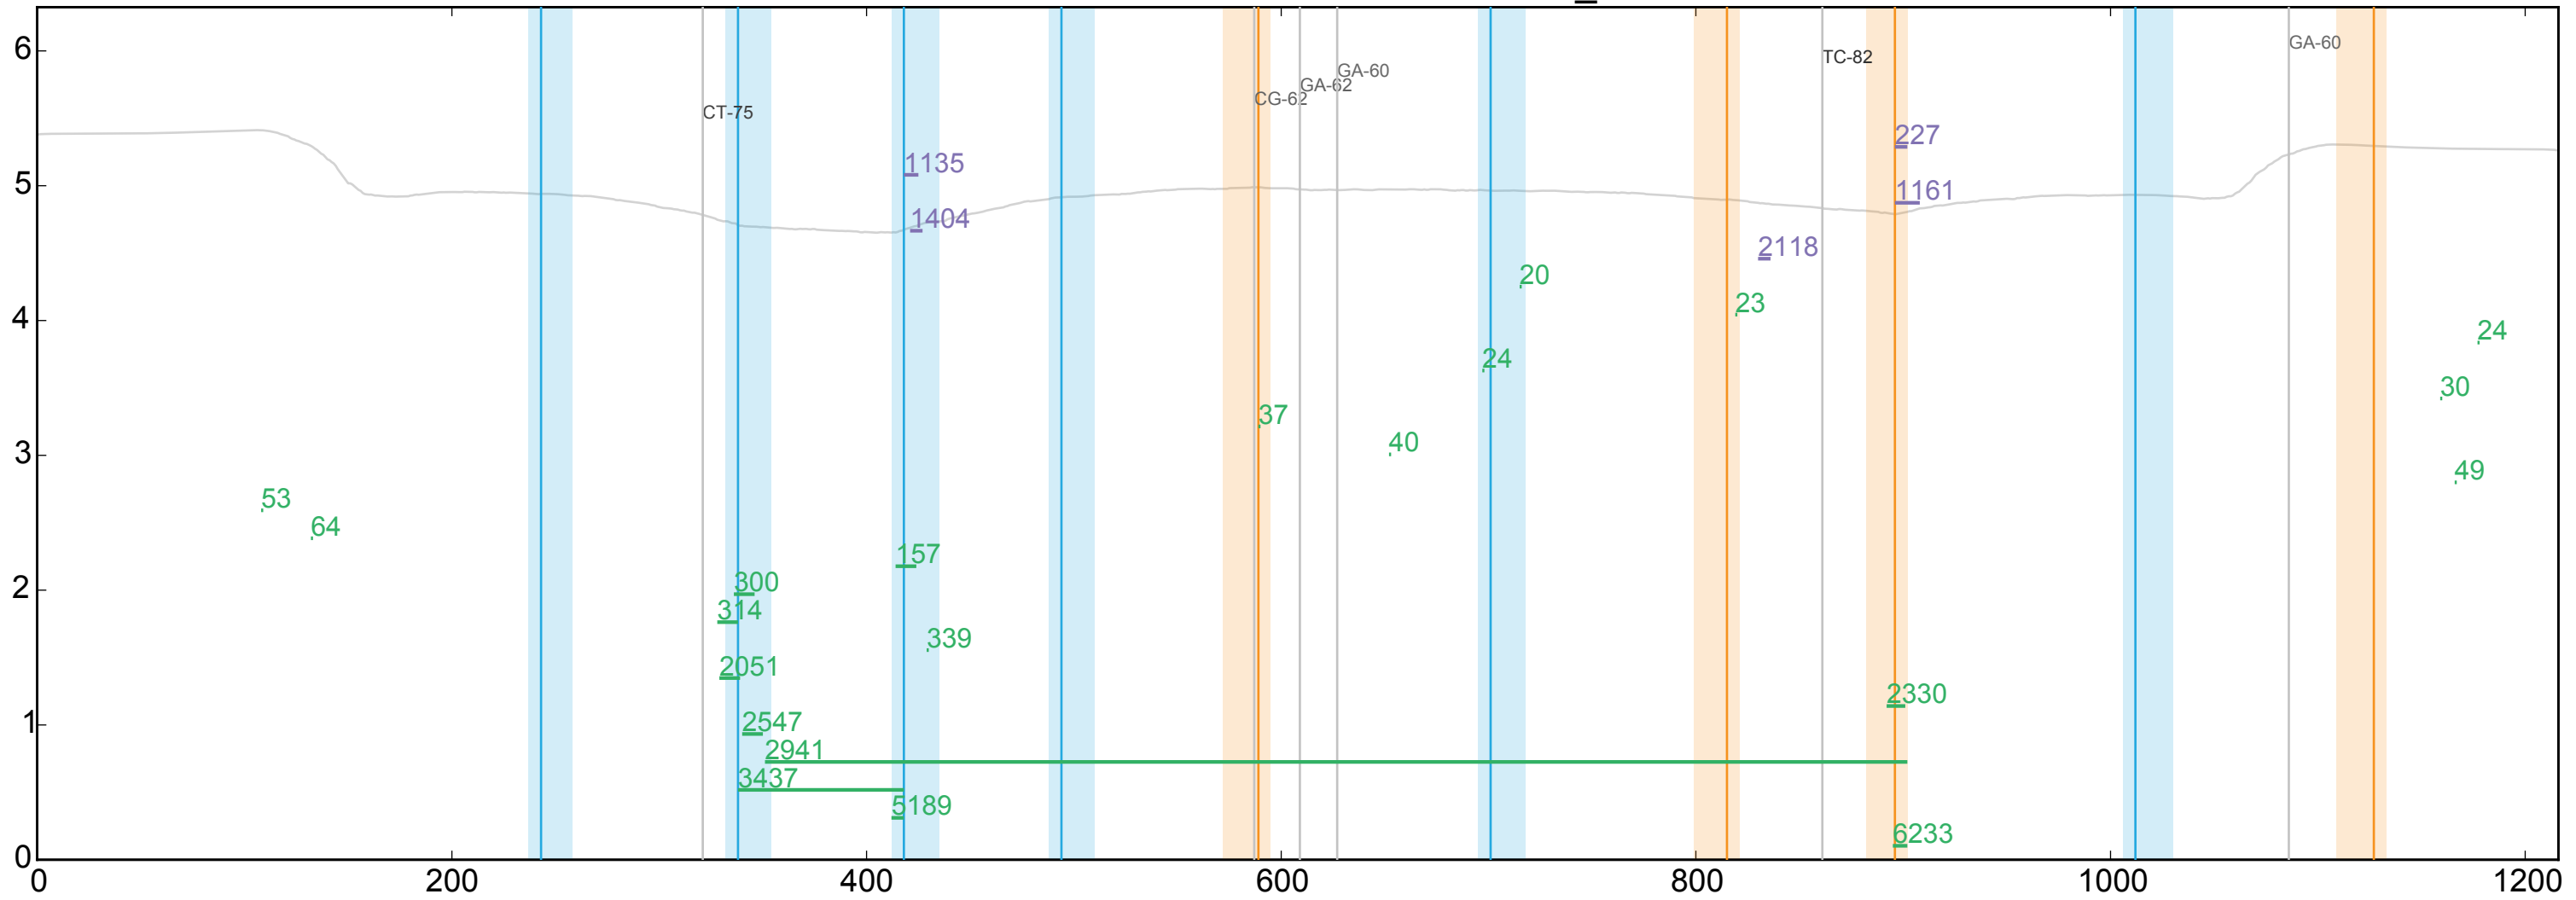

WT ENSDARG00000086551\_1

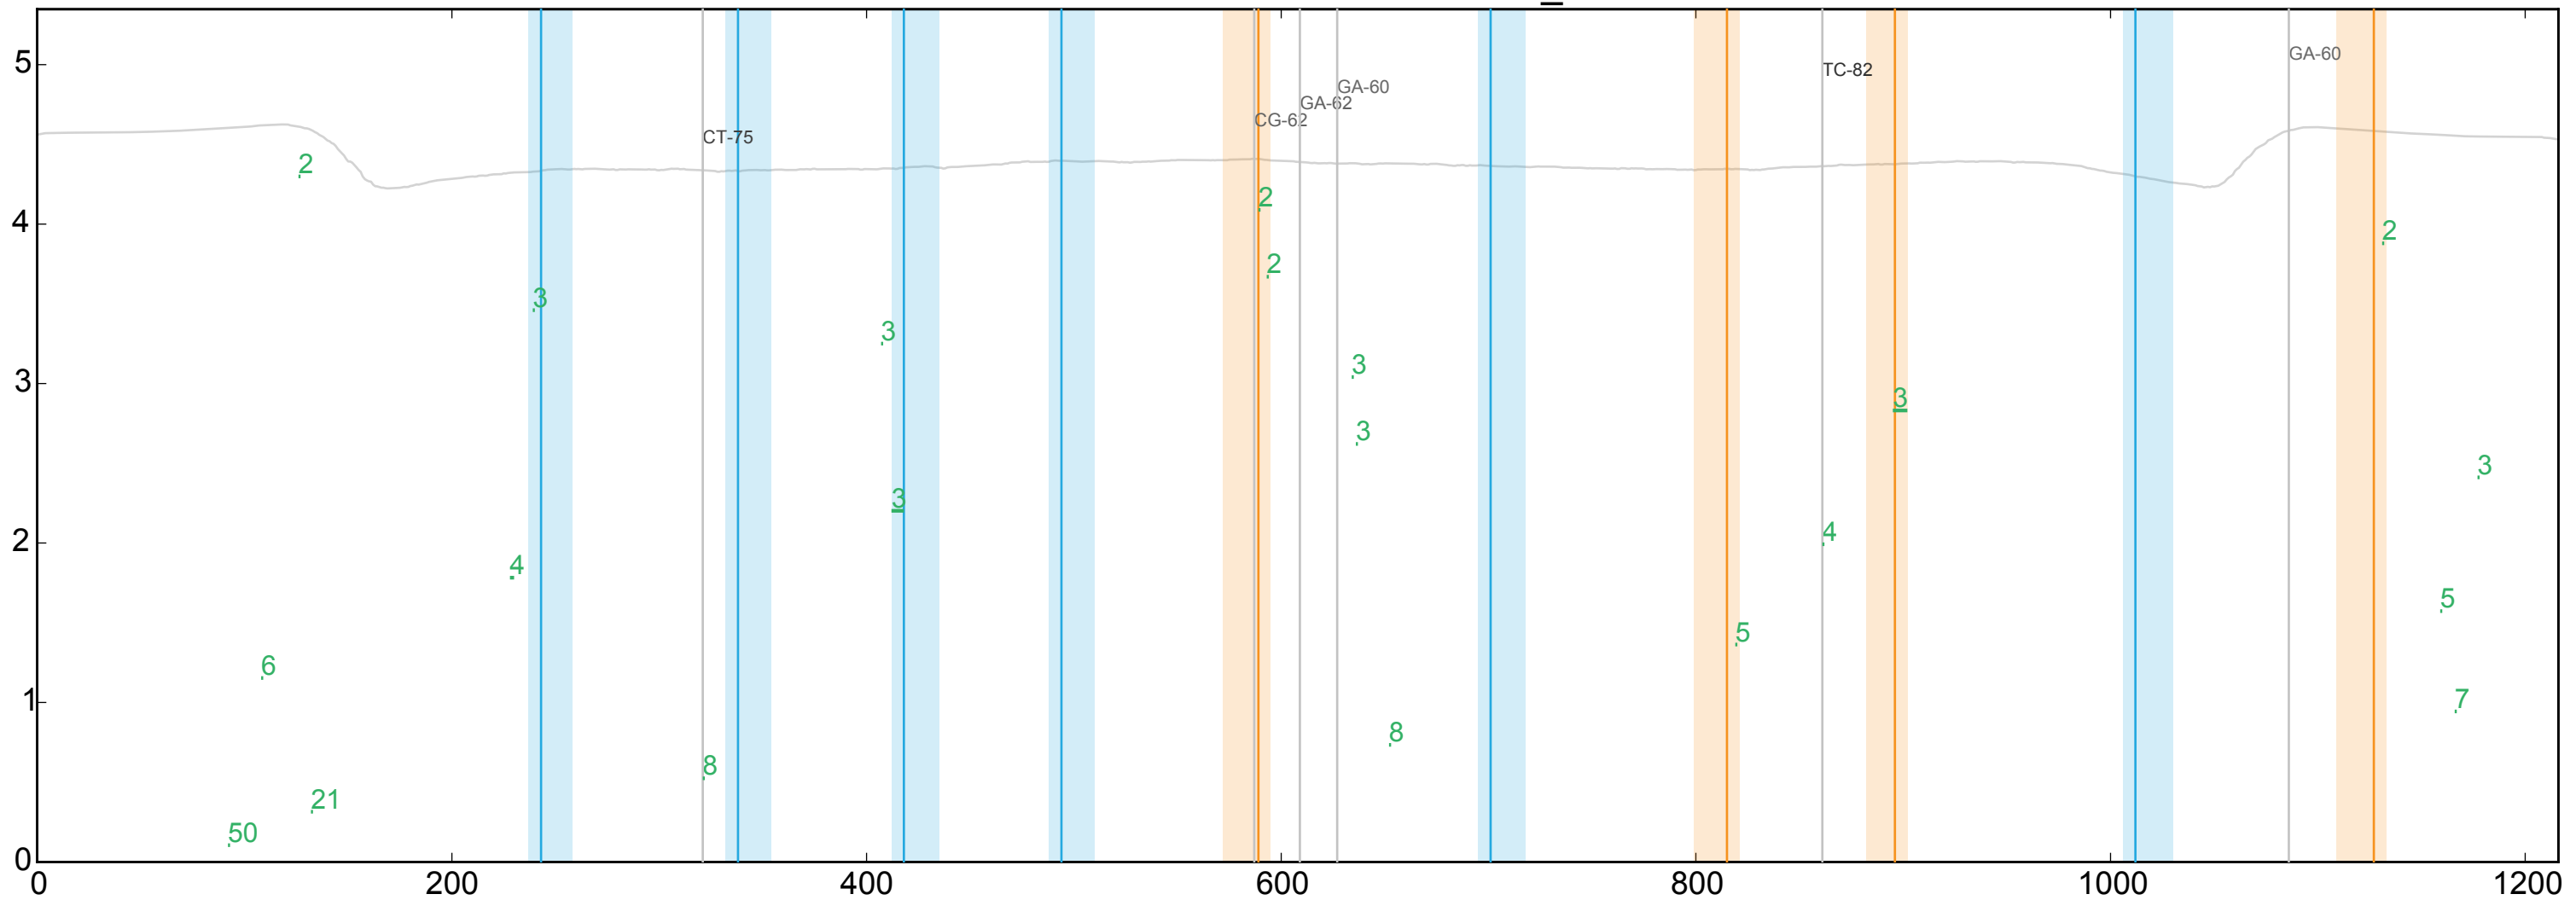

Mutant ENSDARG00000074184\_0

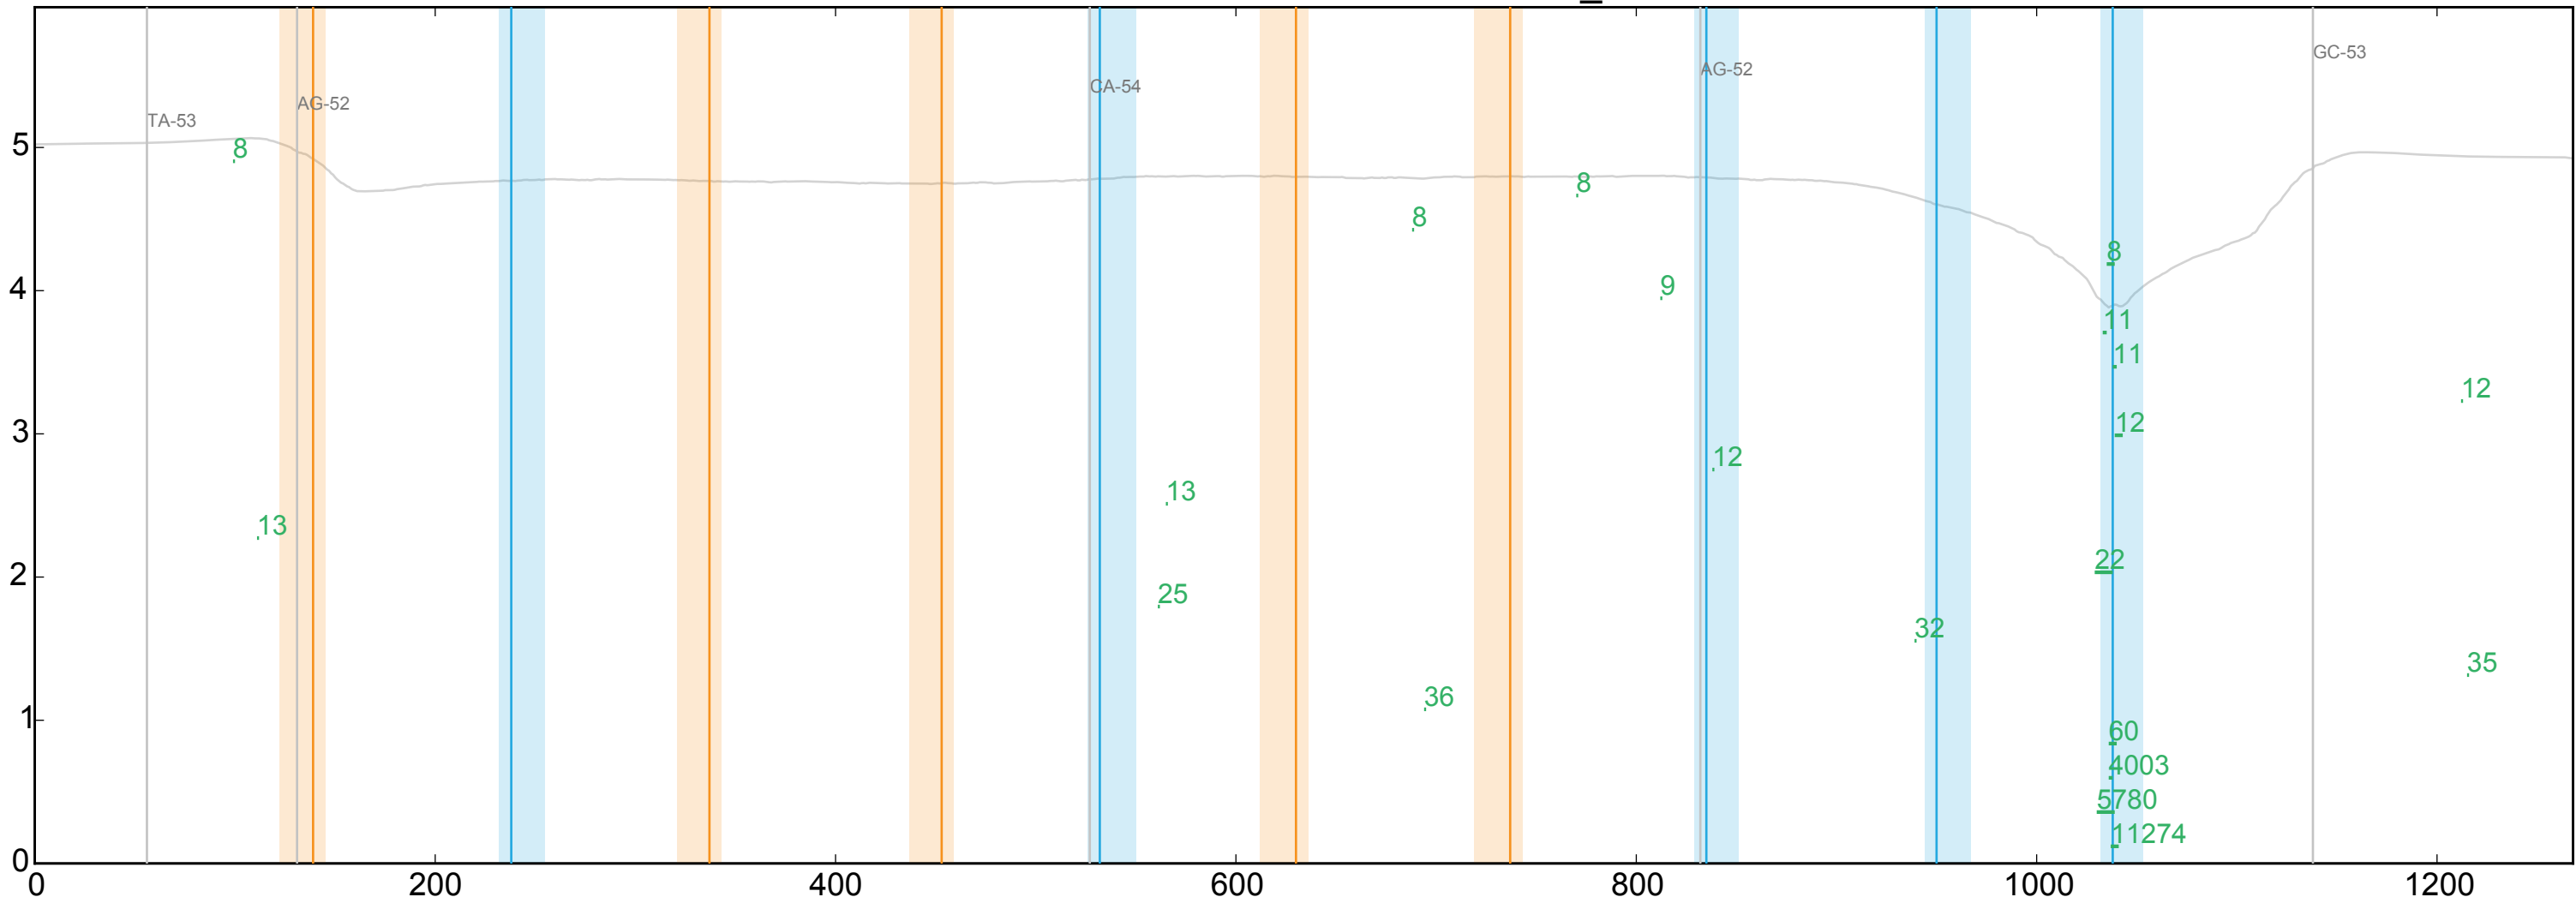

WT ENSDARG00000074184\_0

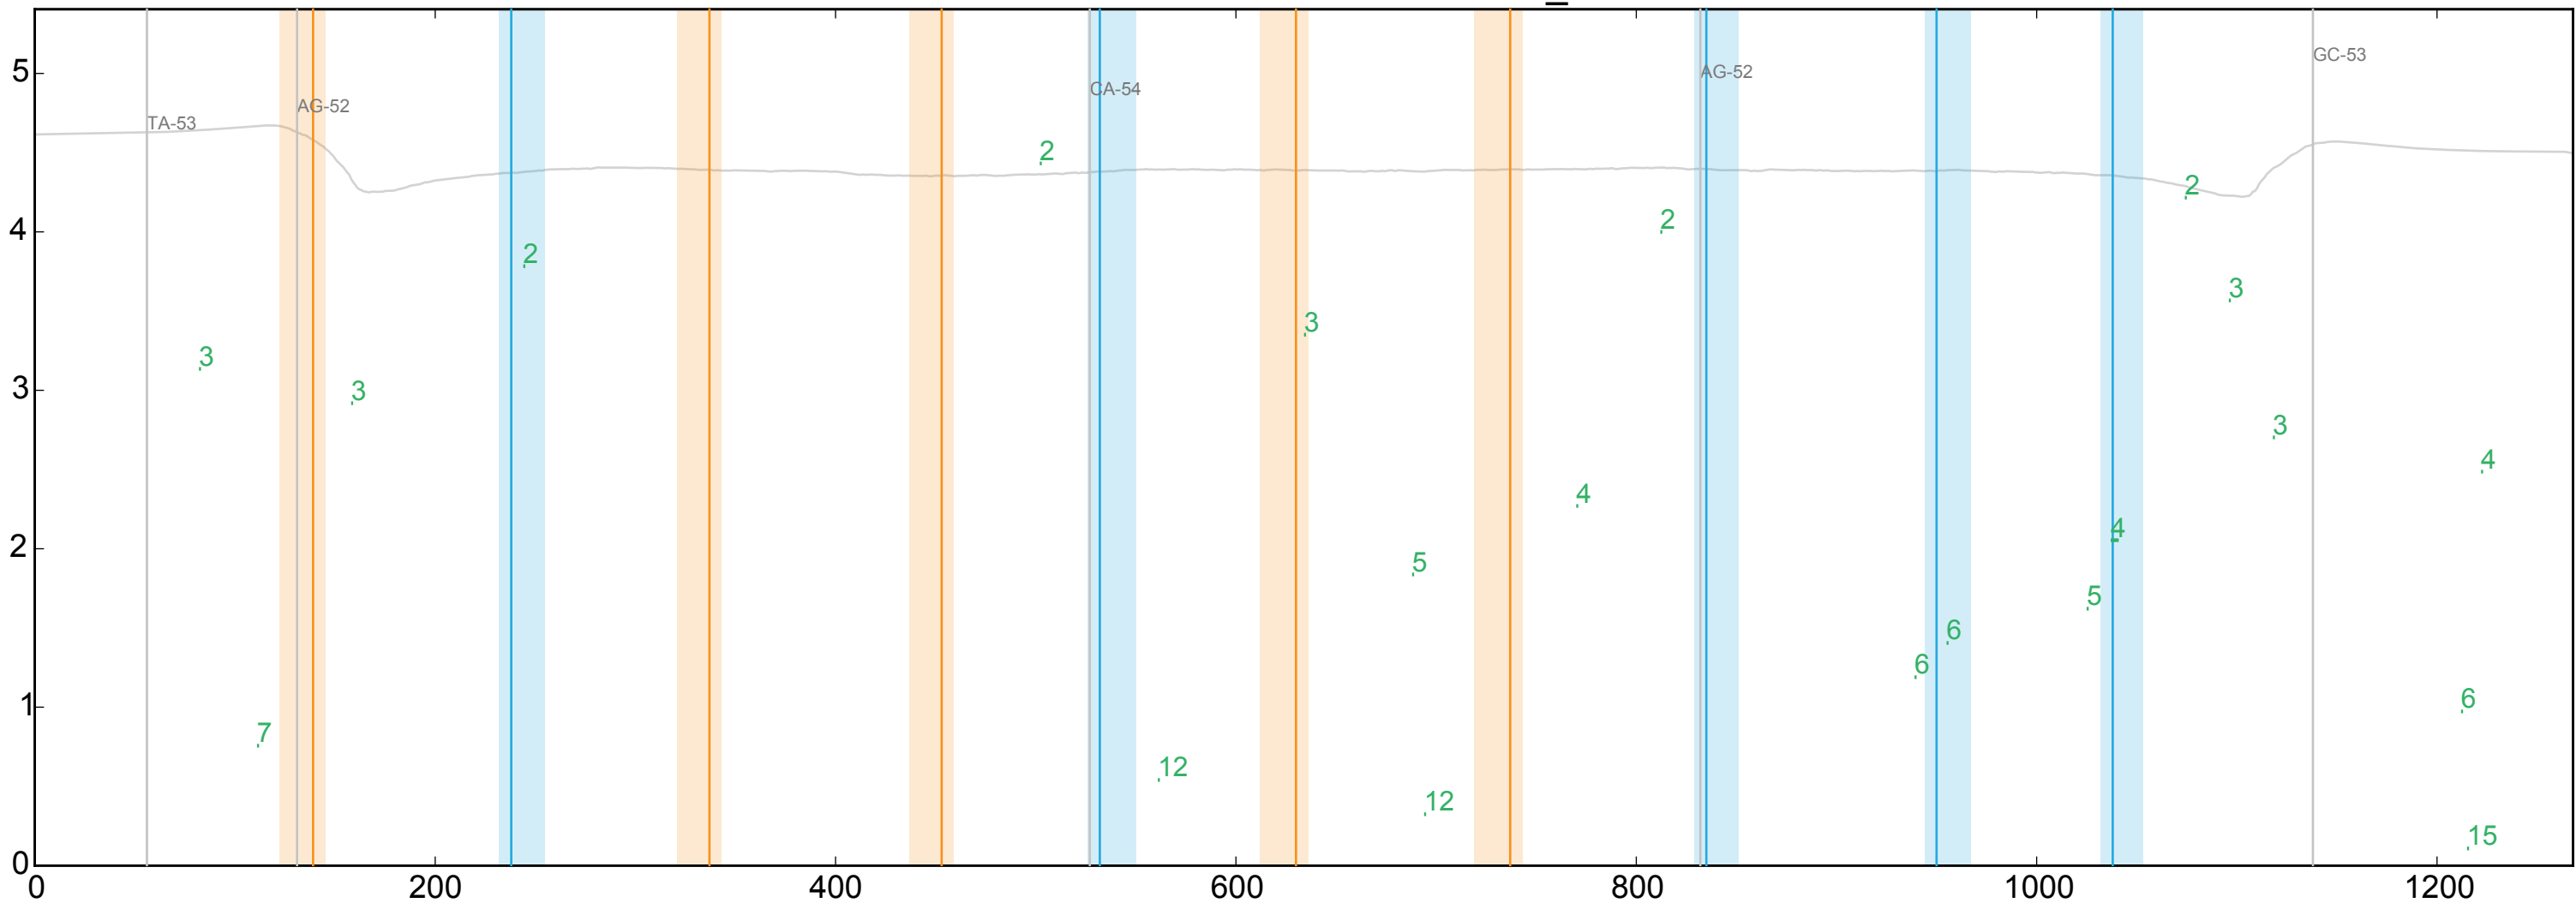

Mutant ENSDARG00000079850\_0

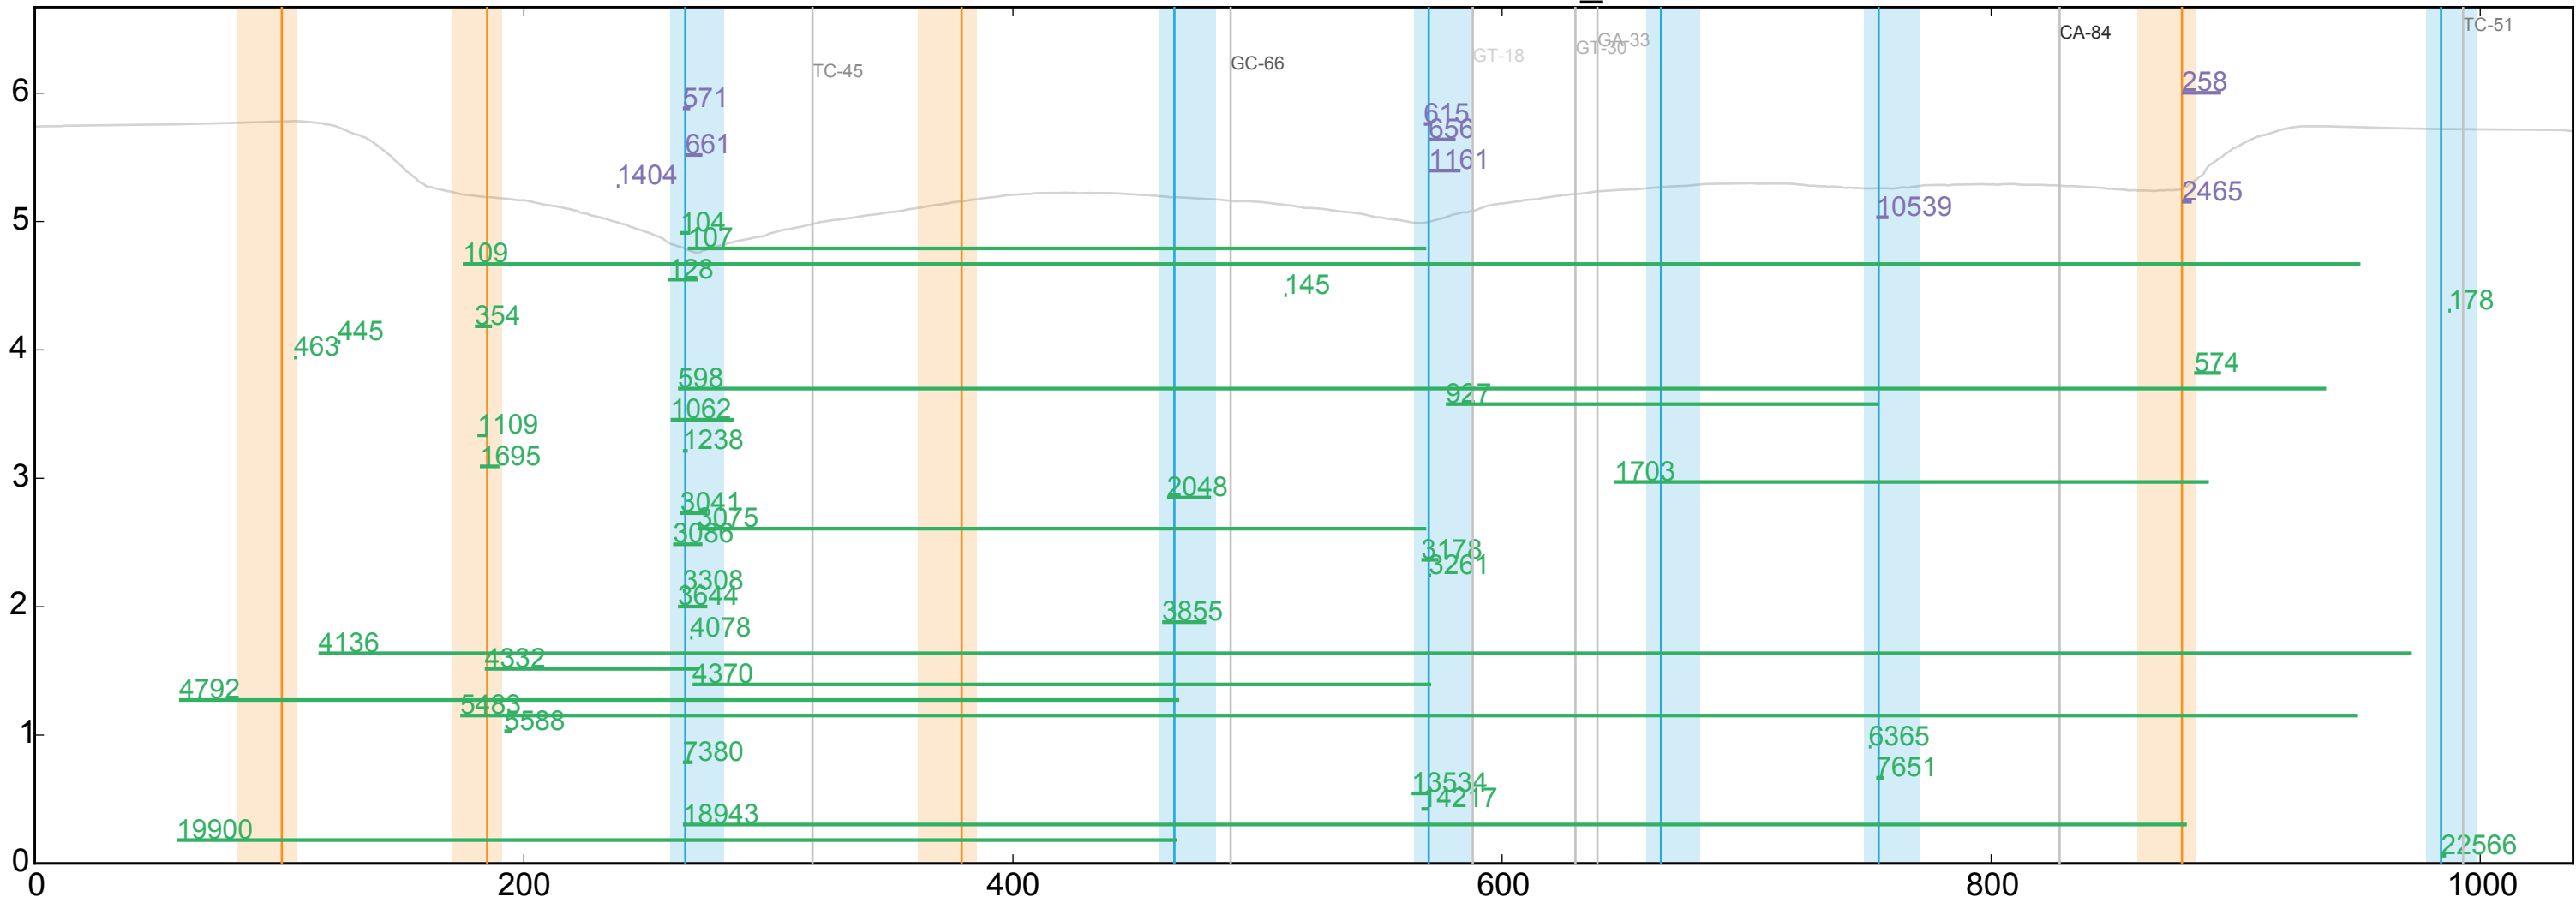

WT ENSDARG00000079850\_0

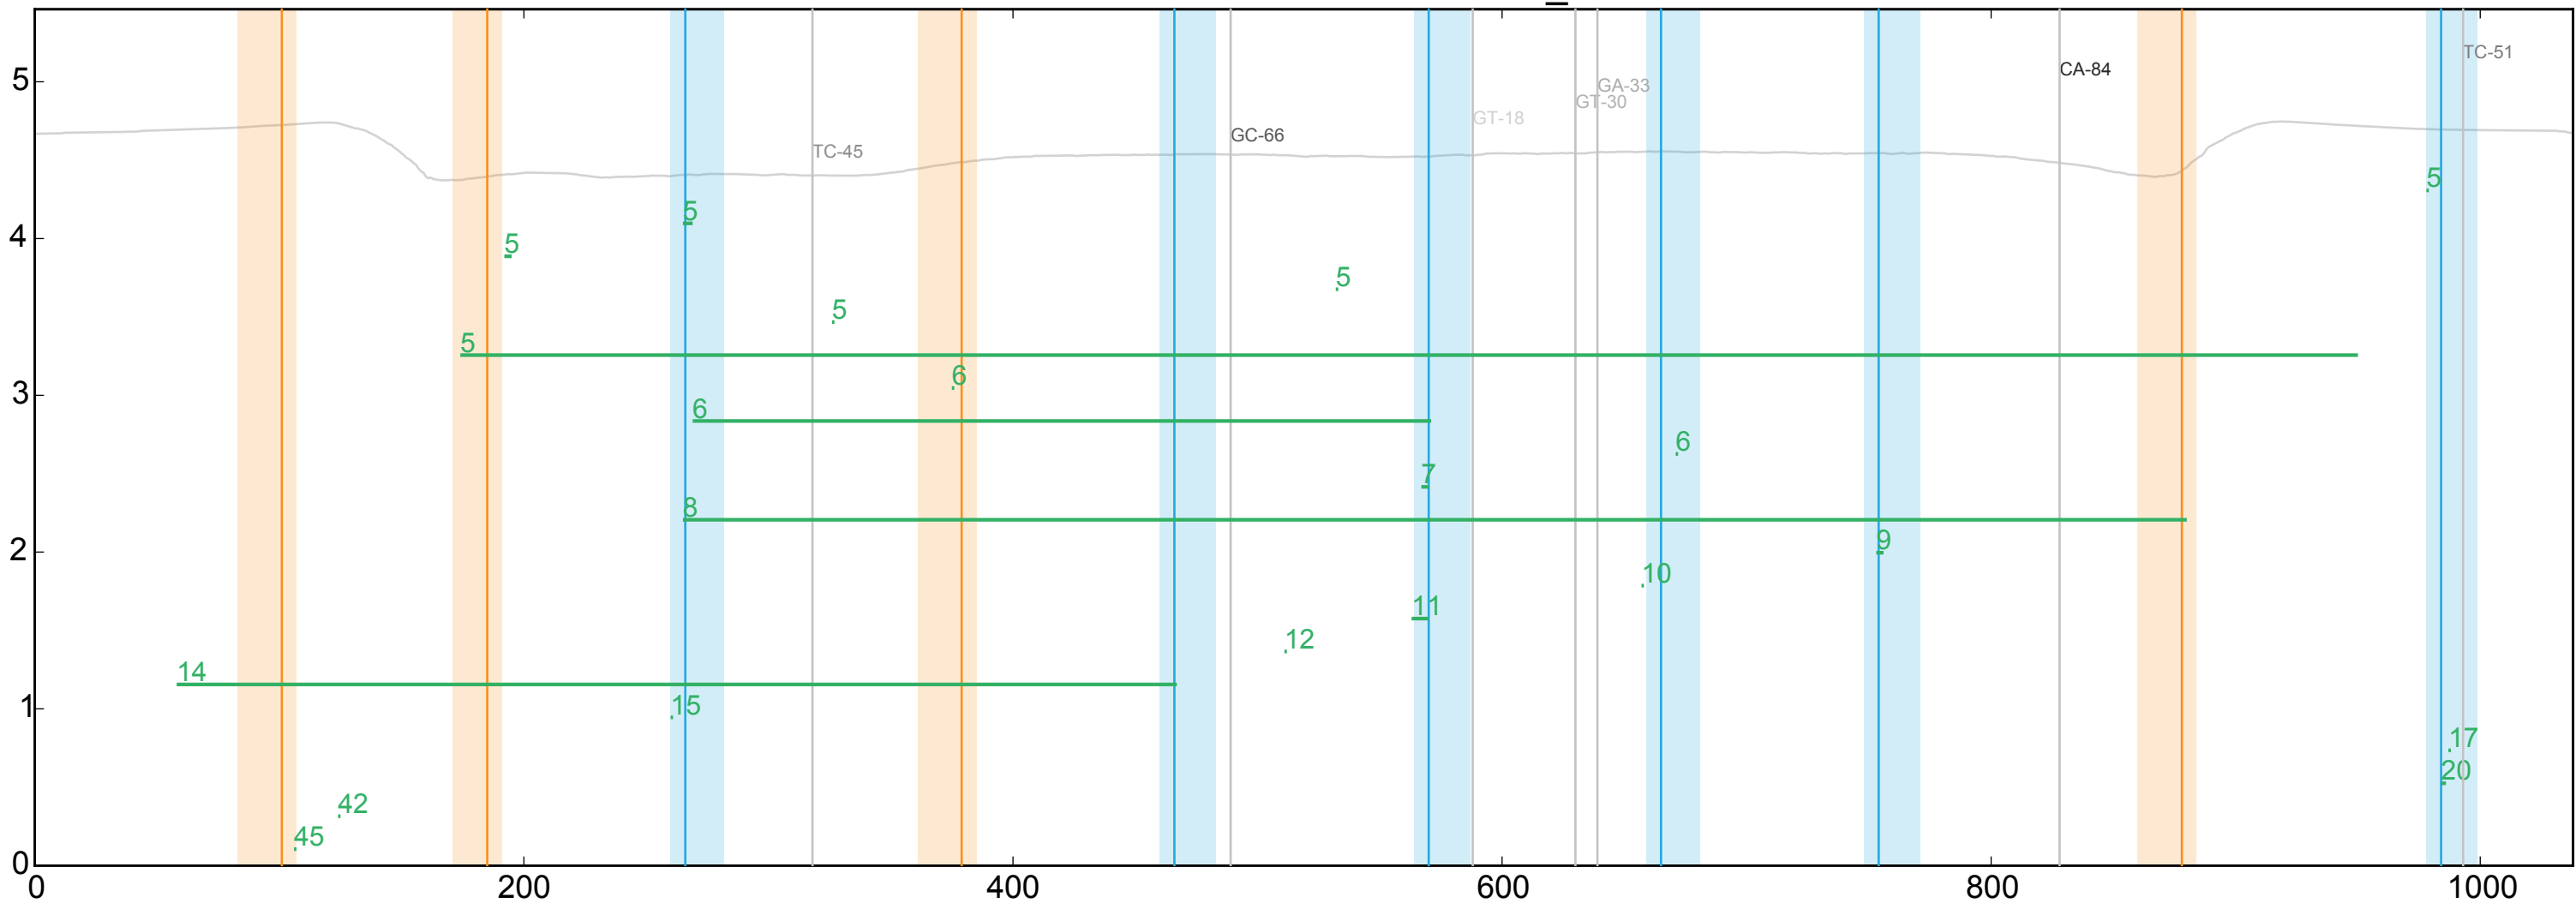

Mutant ENSDARG00000079097\_24

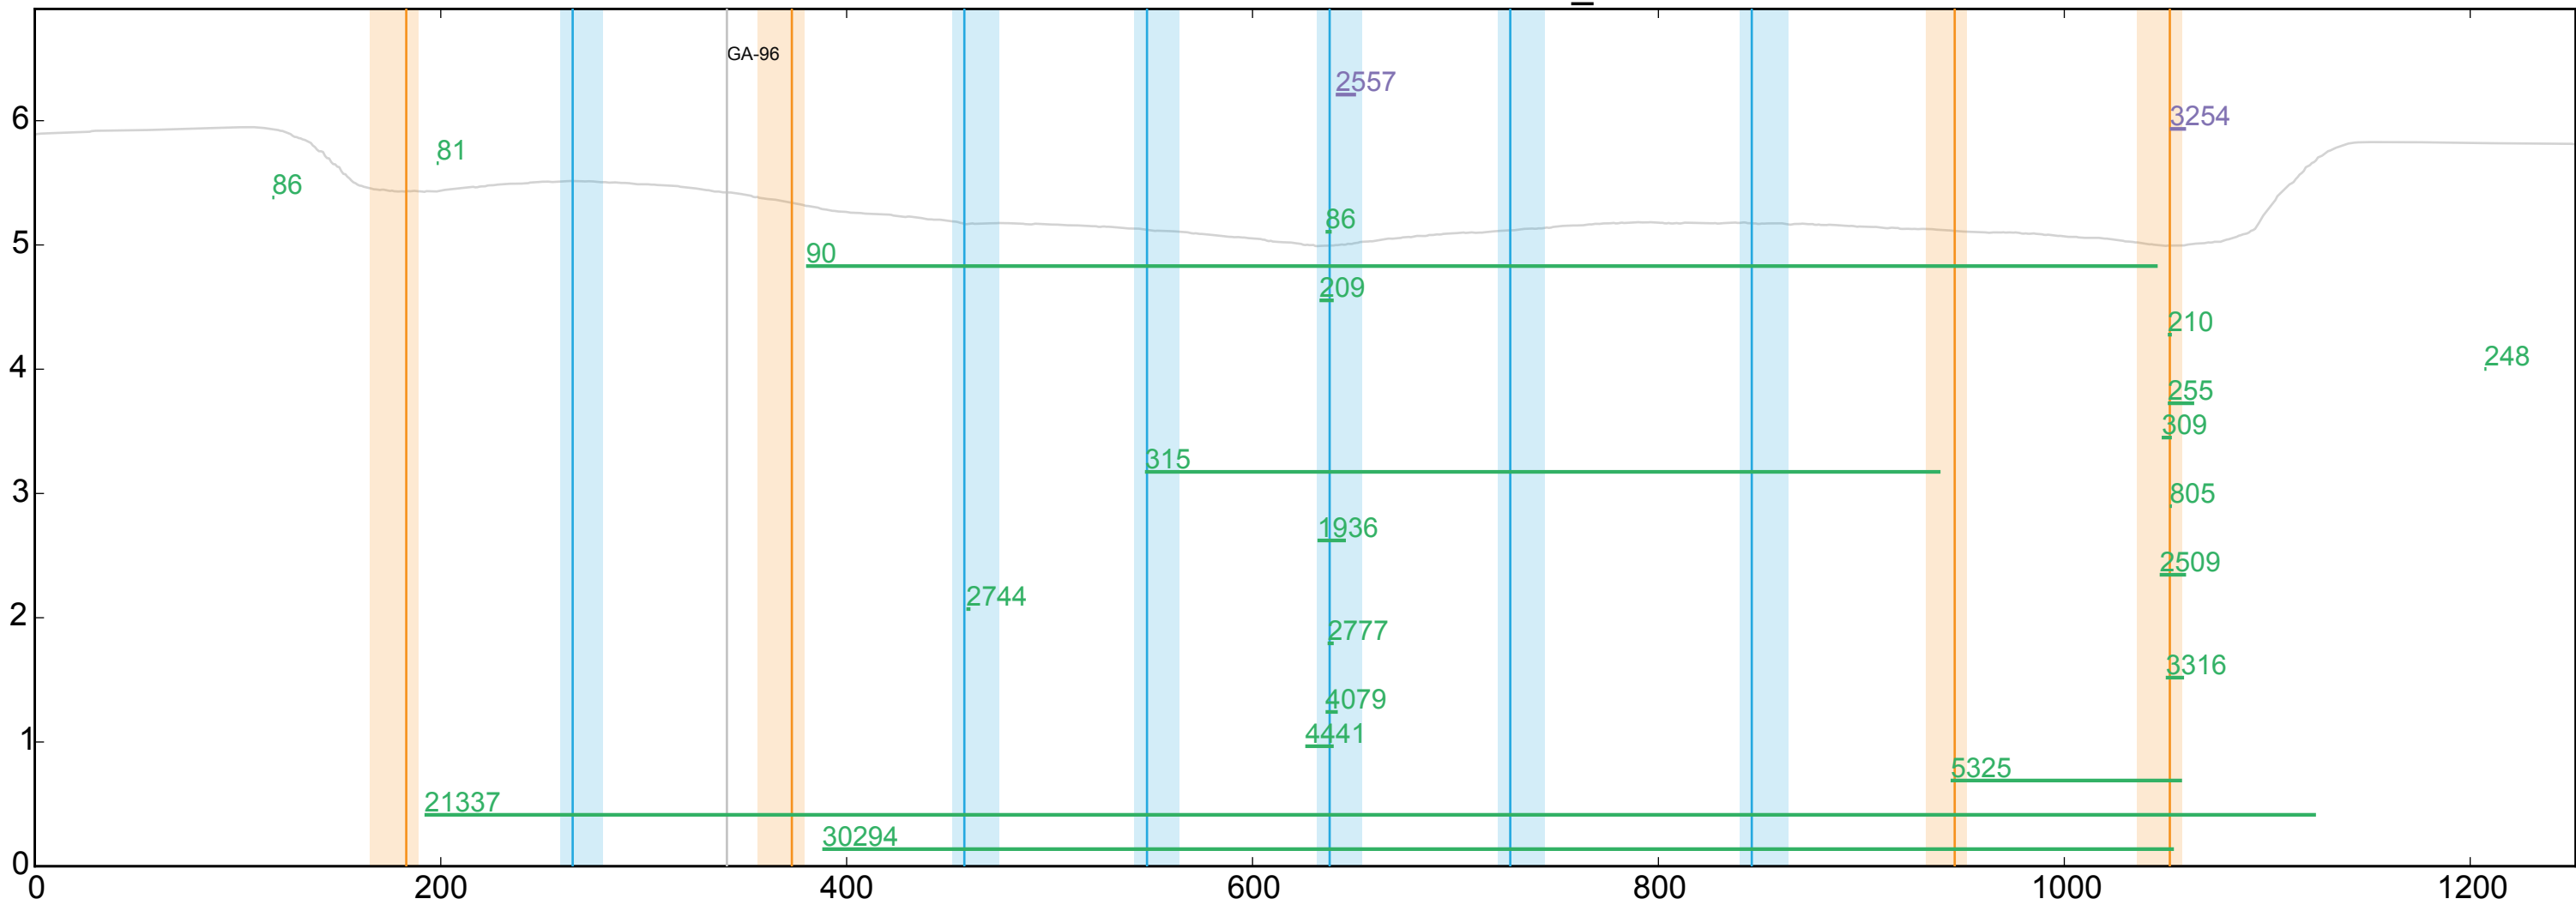

WT ENSDARG00000079097\_24

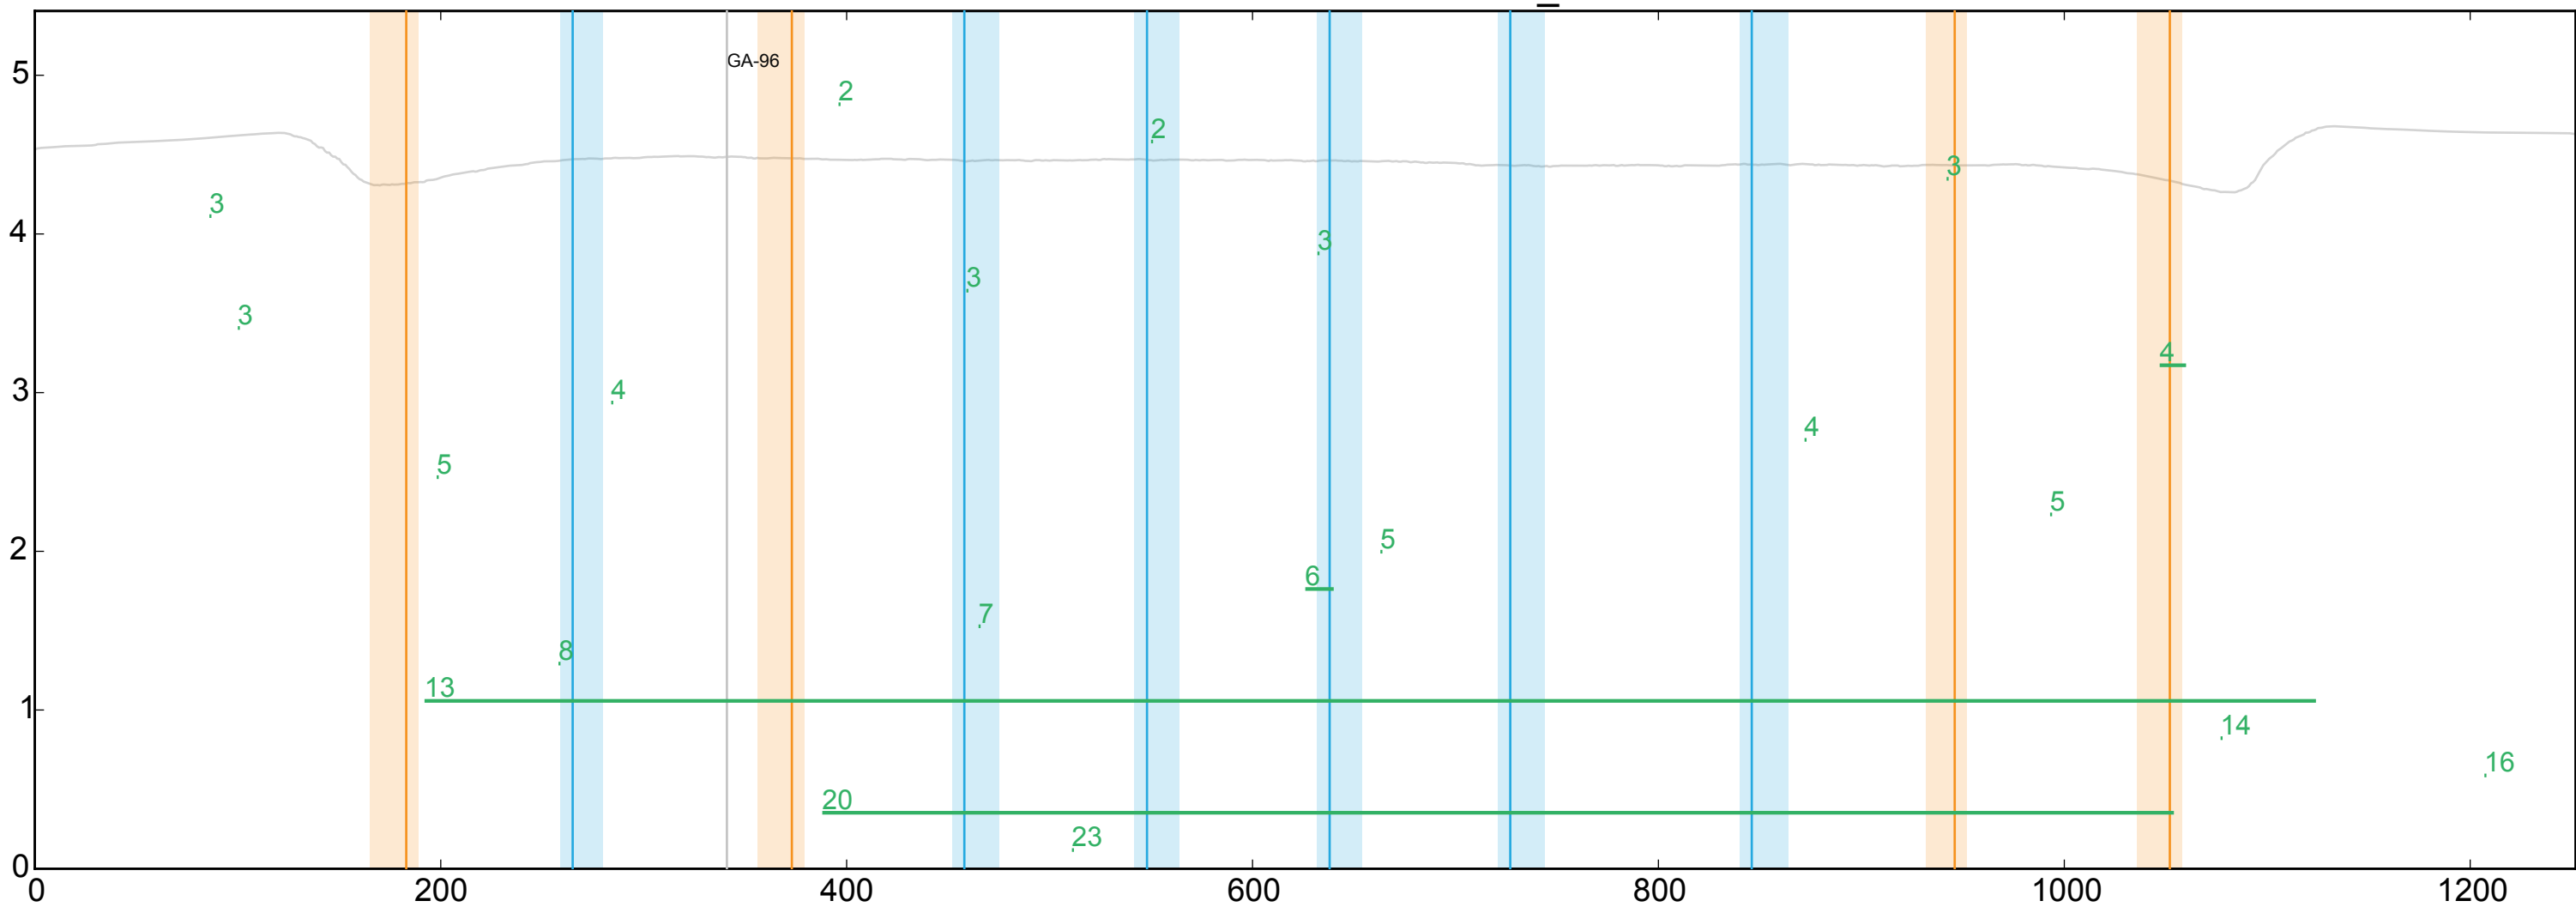

Mutant ENSDARG00000074474\_8

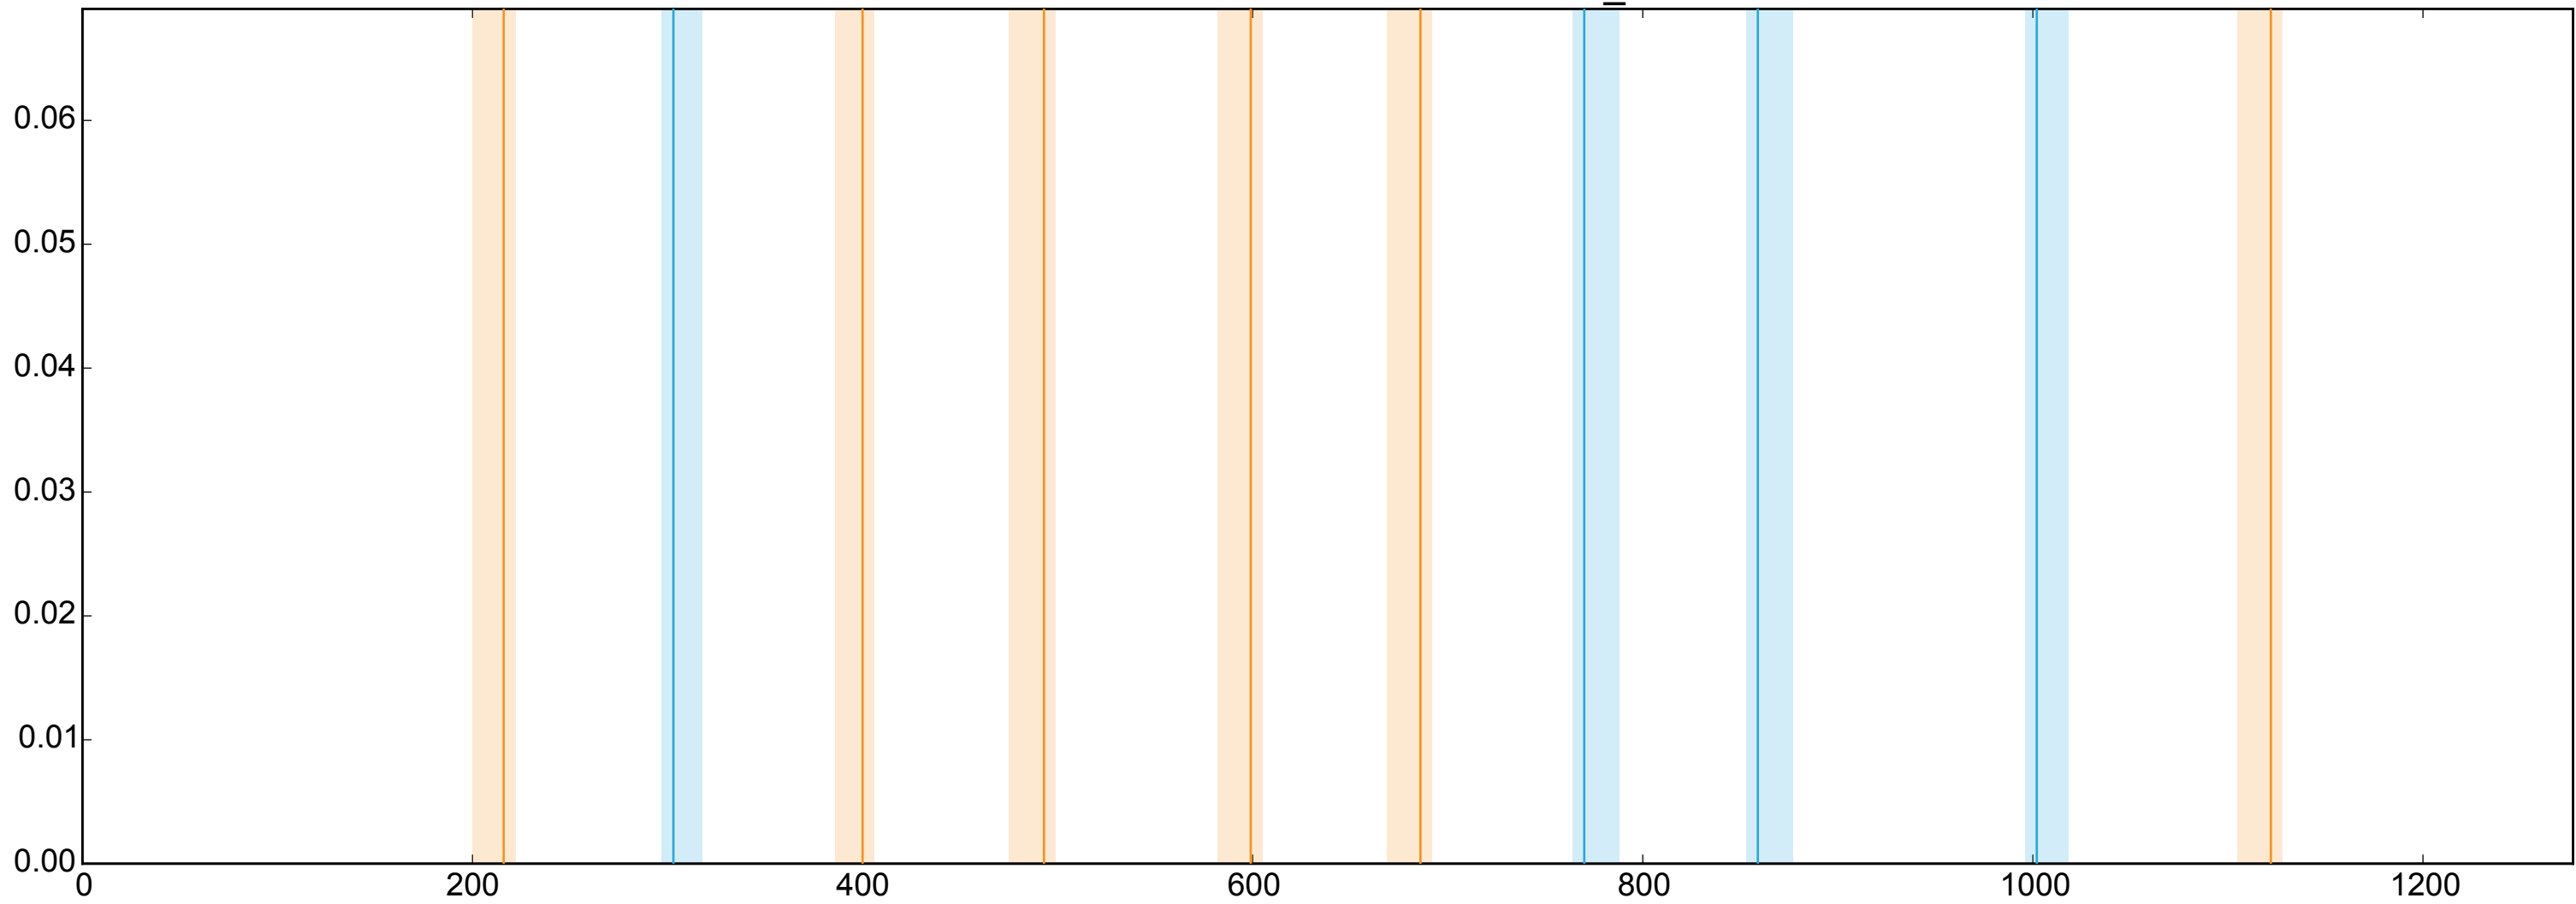

WT ENSDARG00000074474\_8

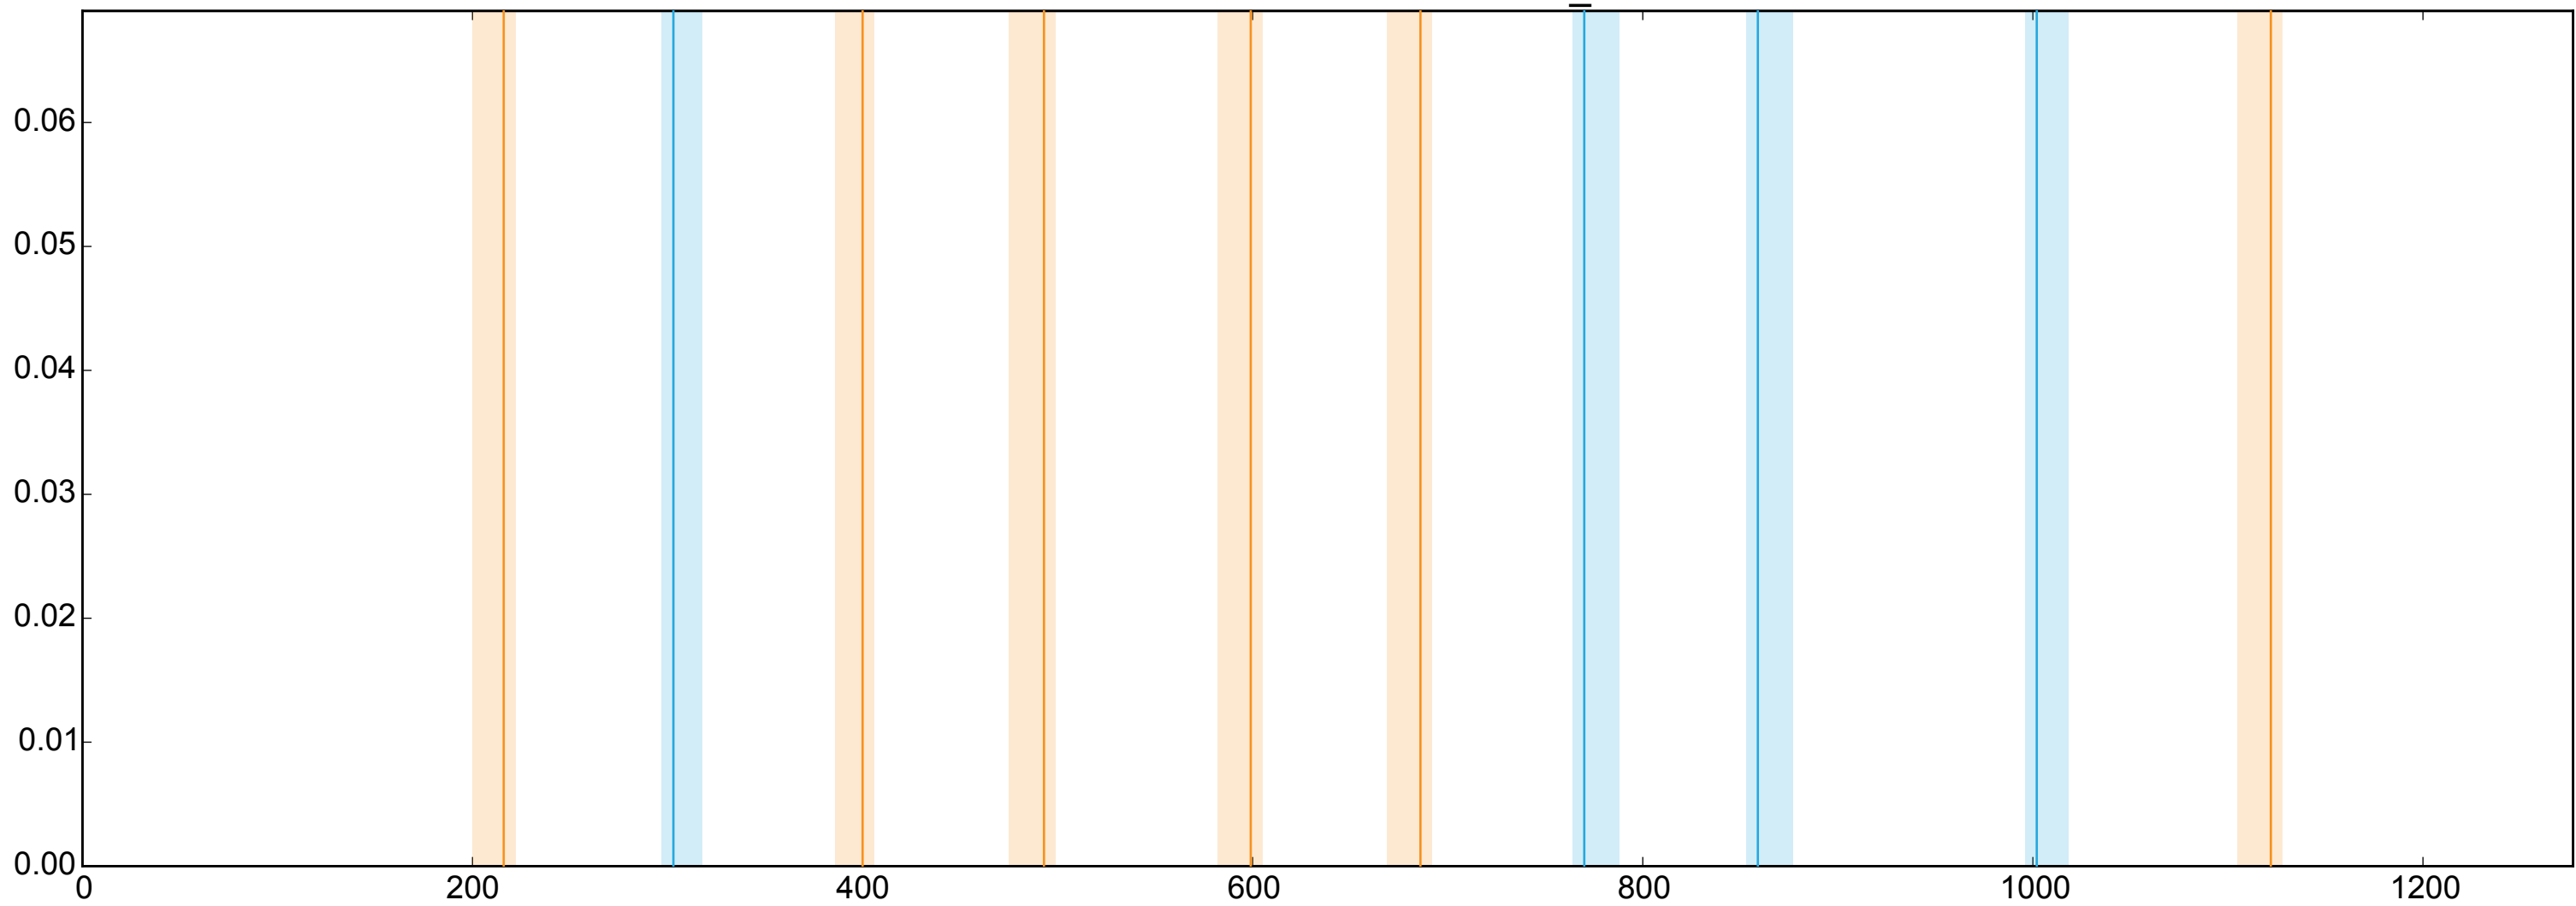

Mutant ENSDARG00000062646\_0

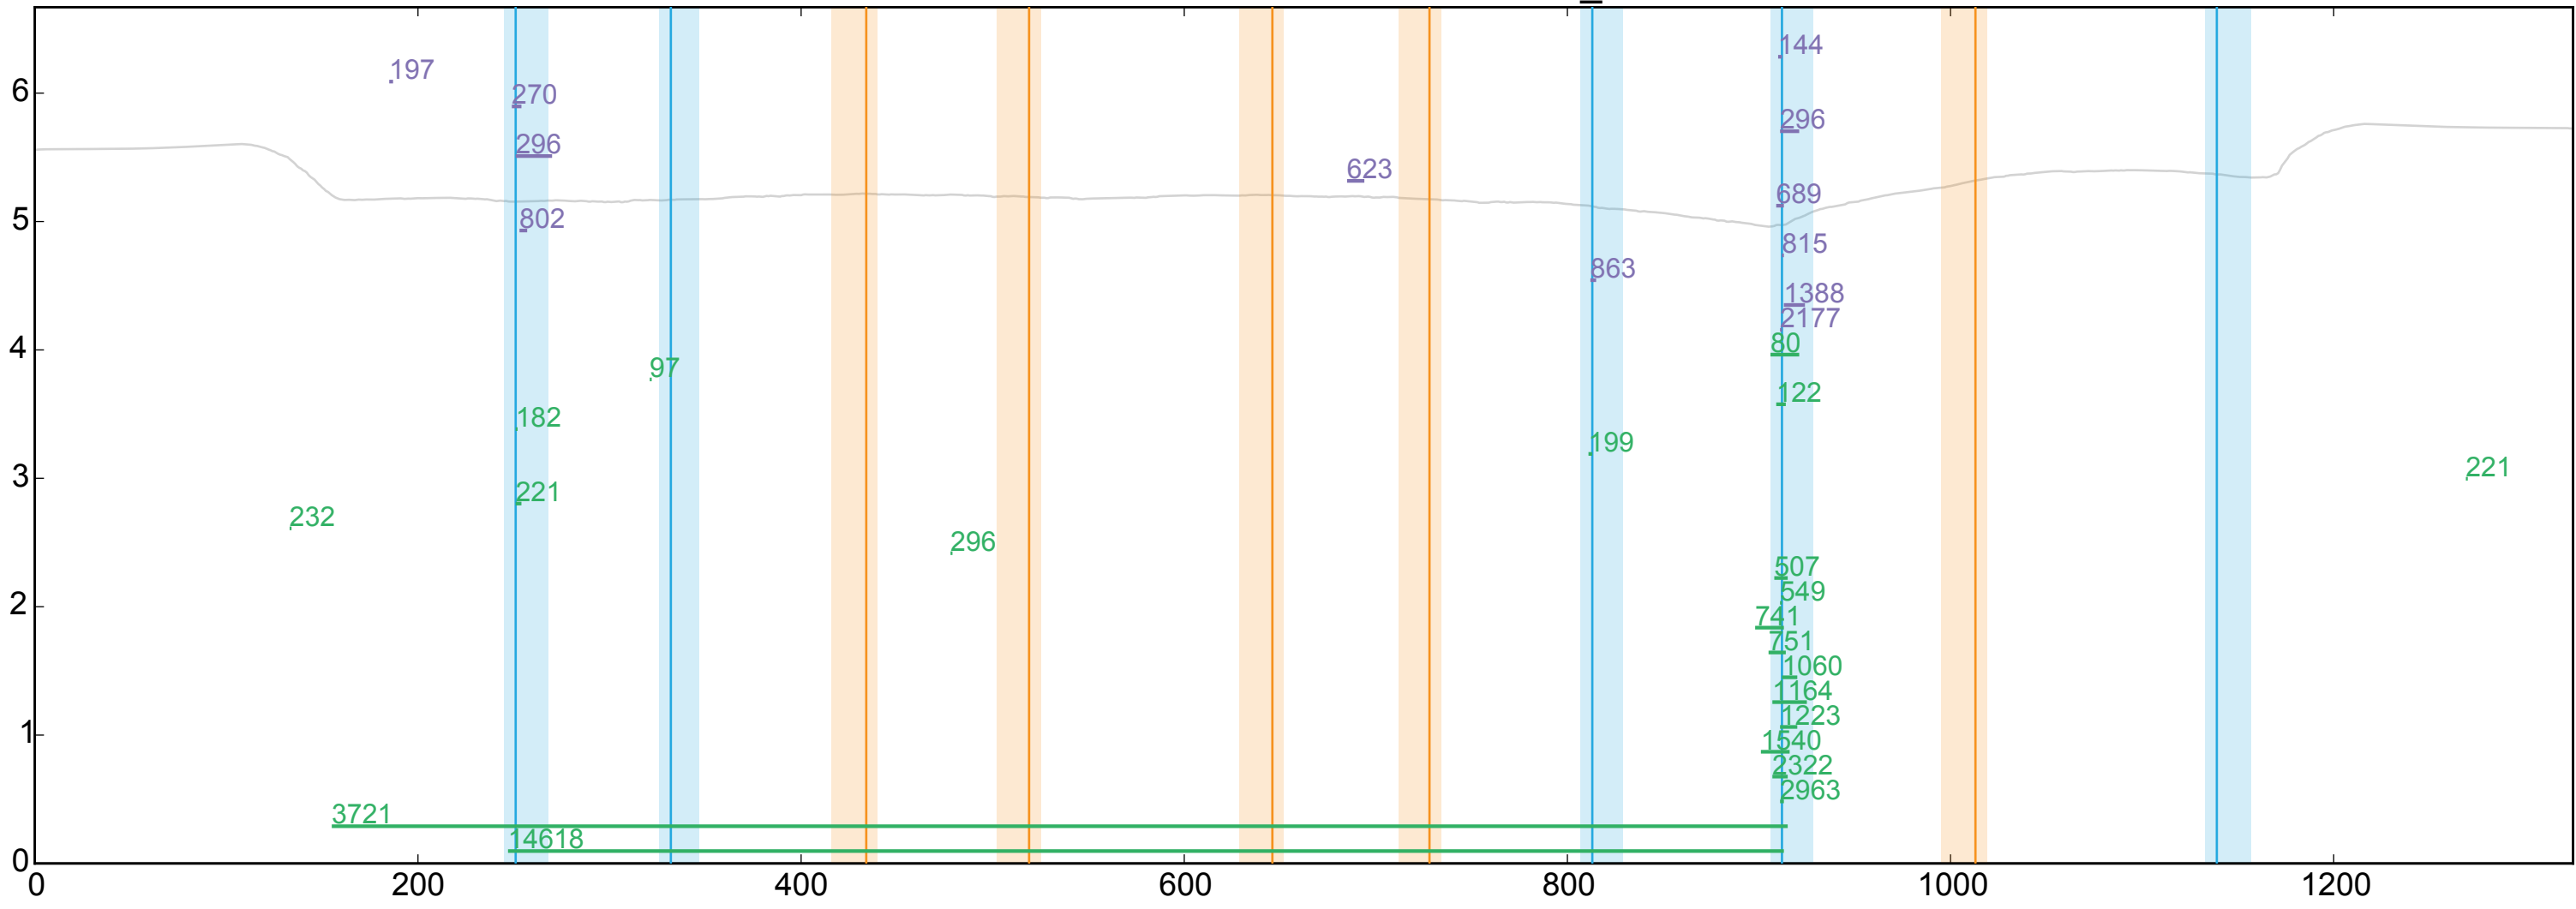

WT ENSDARG00000062646\_0

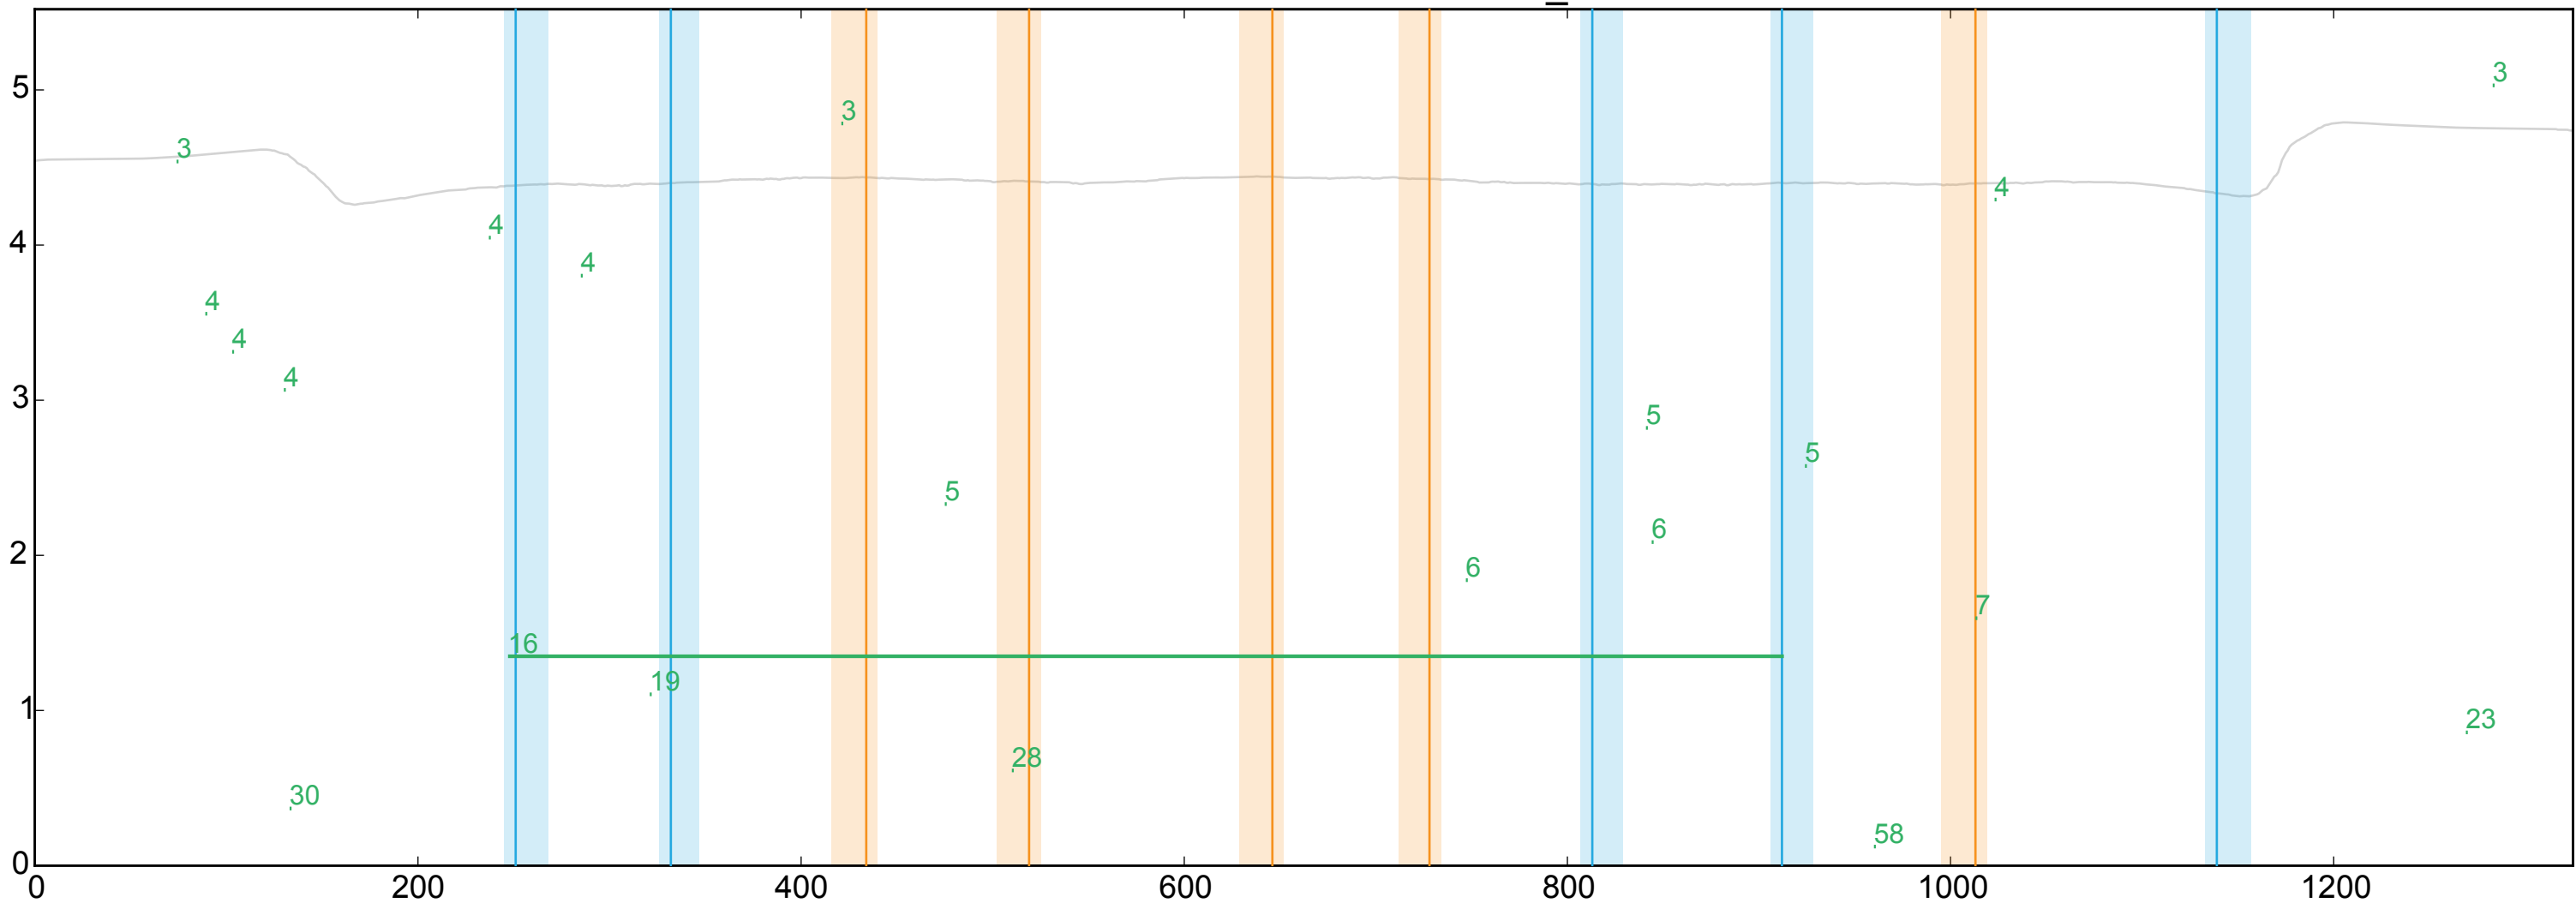

Mutant ENSDARG00000092067\_5

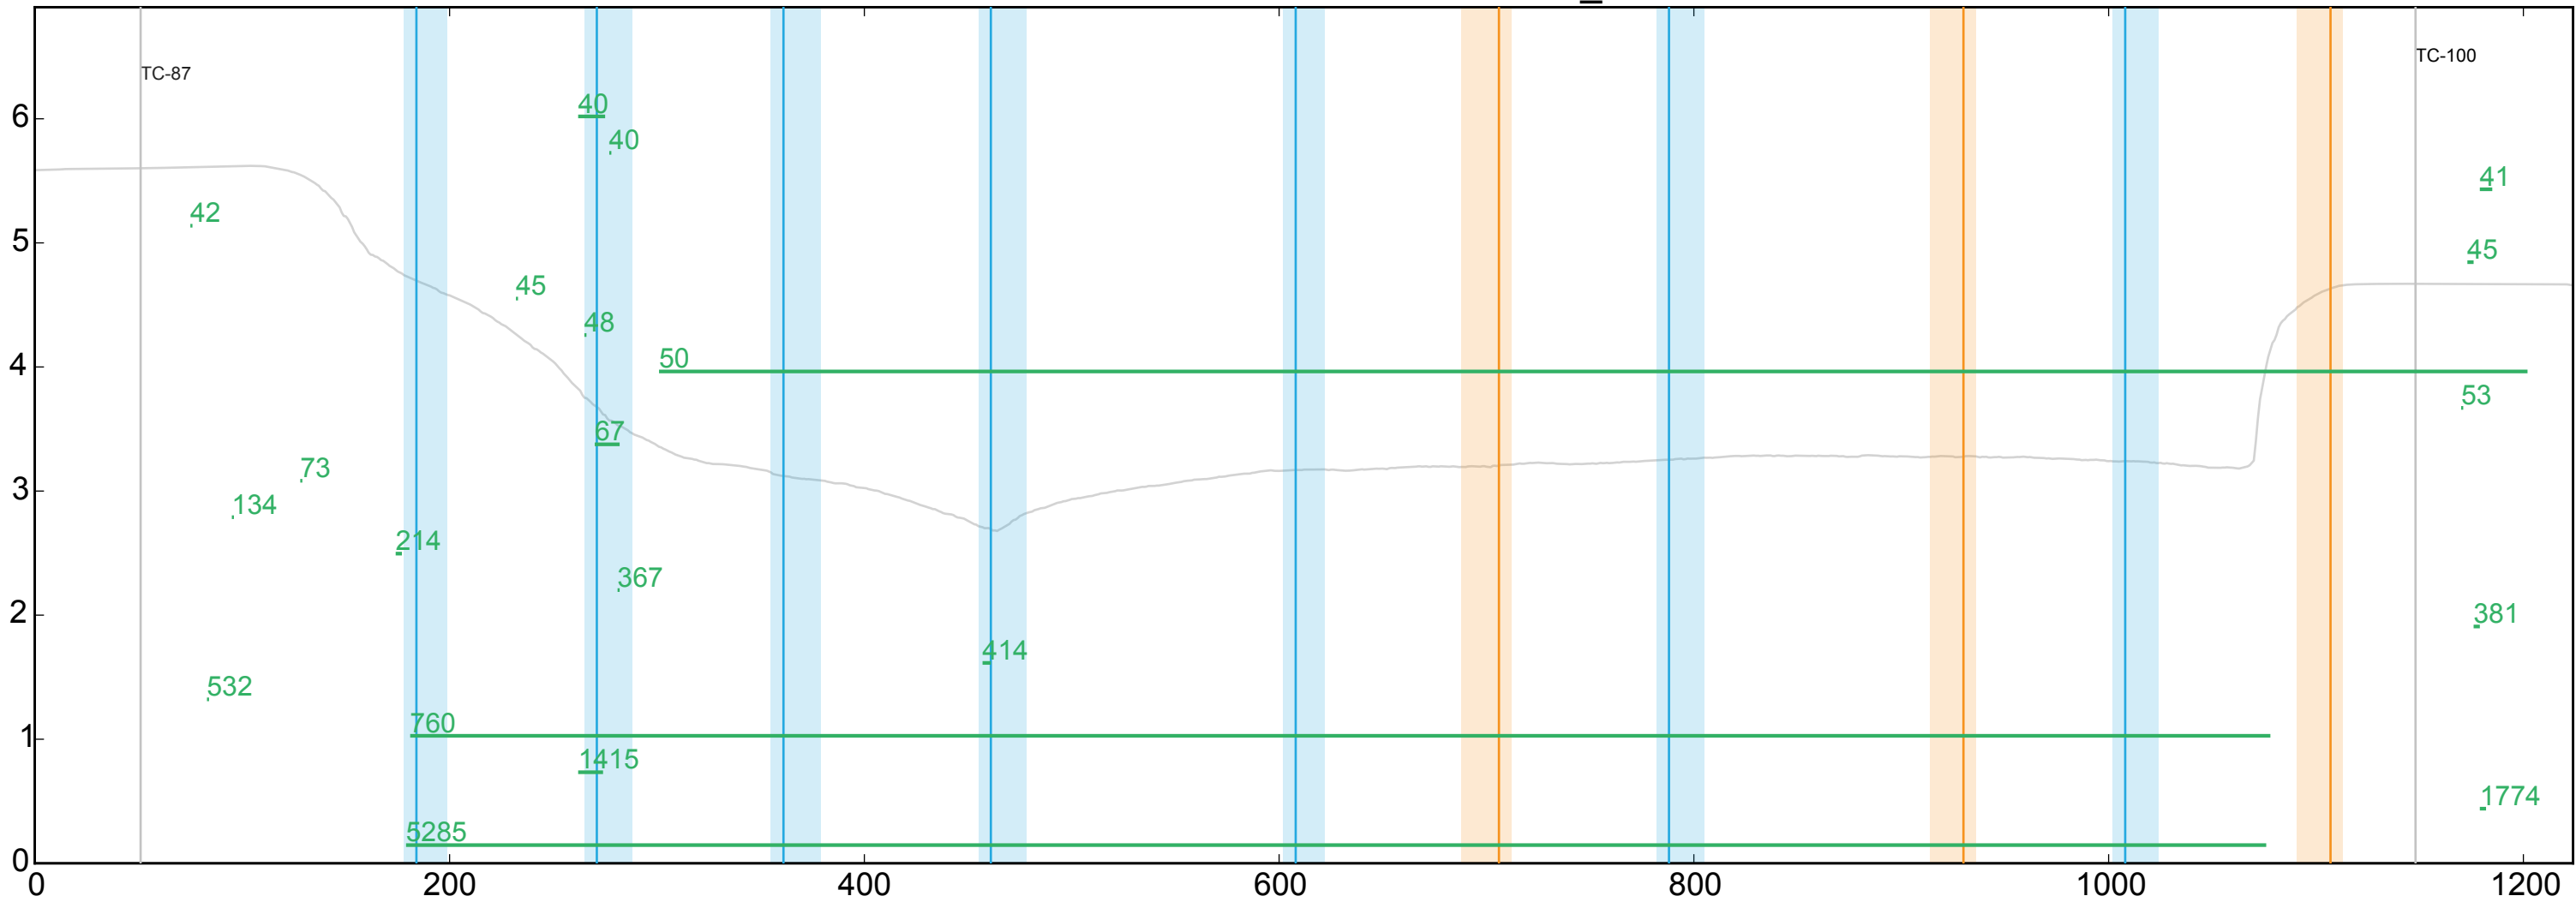

WT ENSDARG00000092067\_5

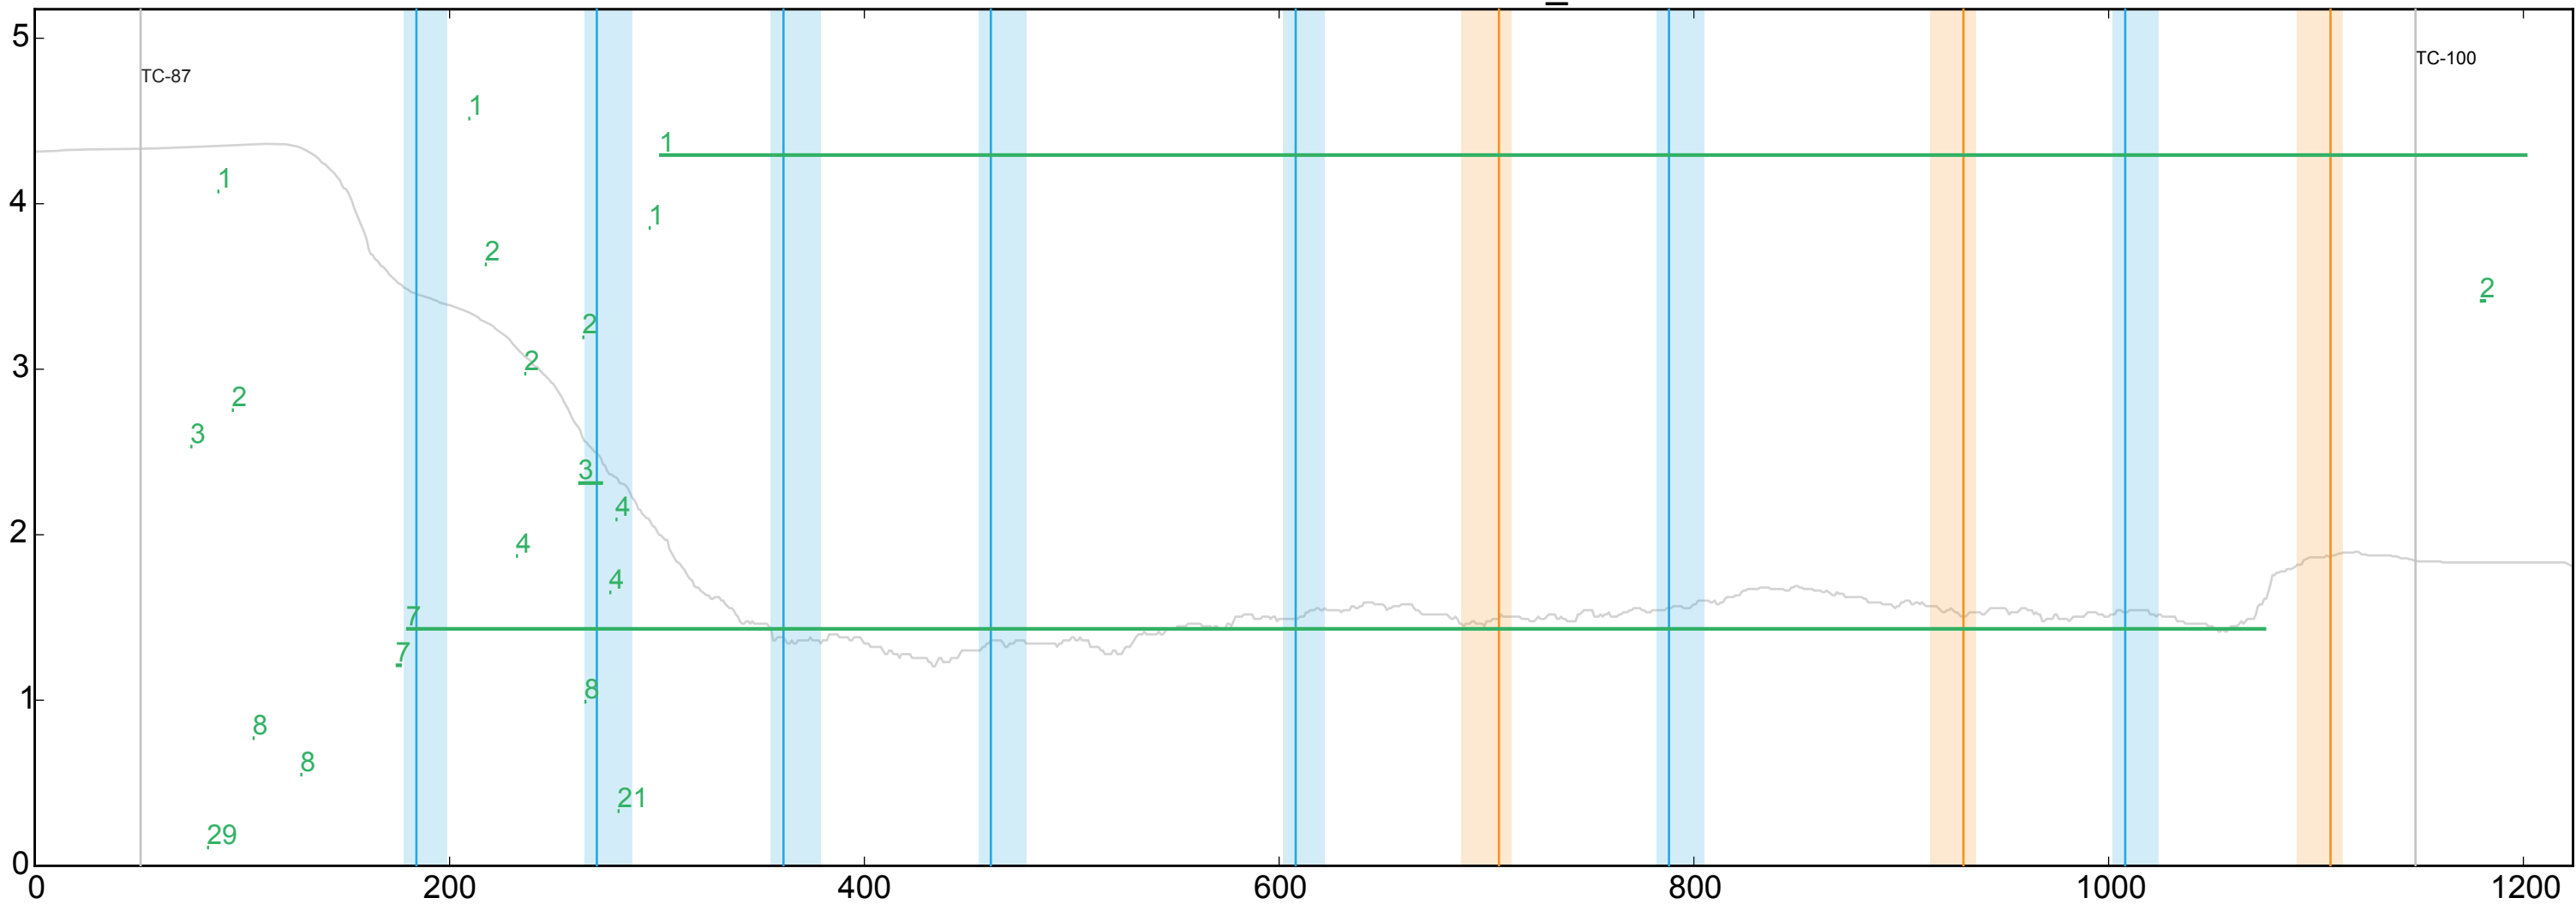

Mutant ENSDARG00000076045\_9

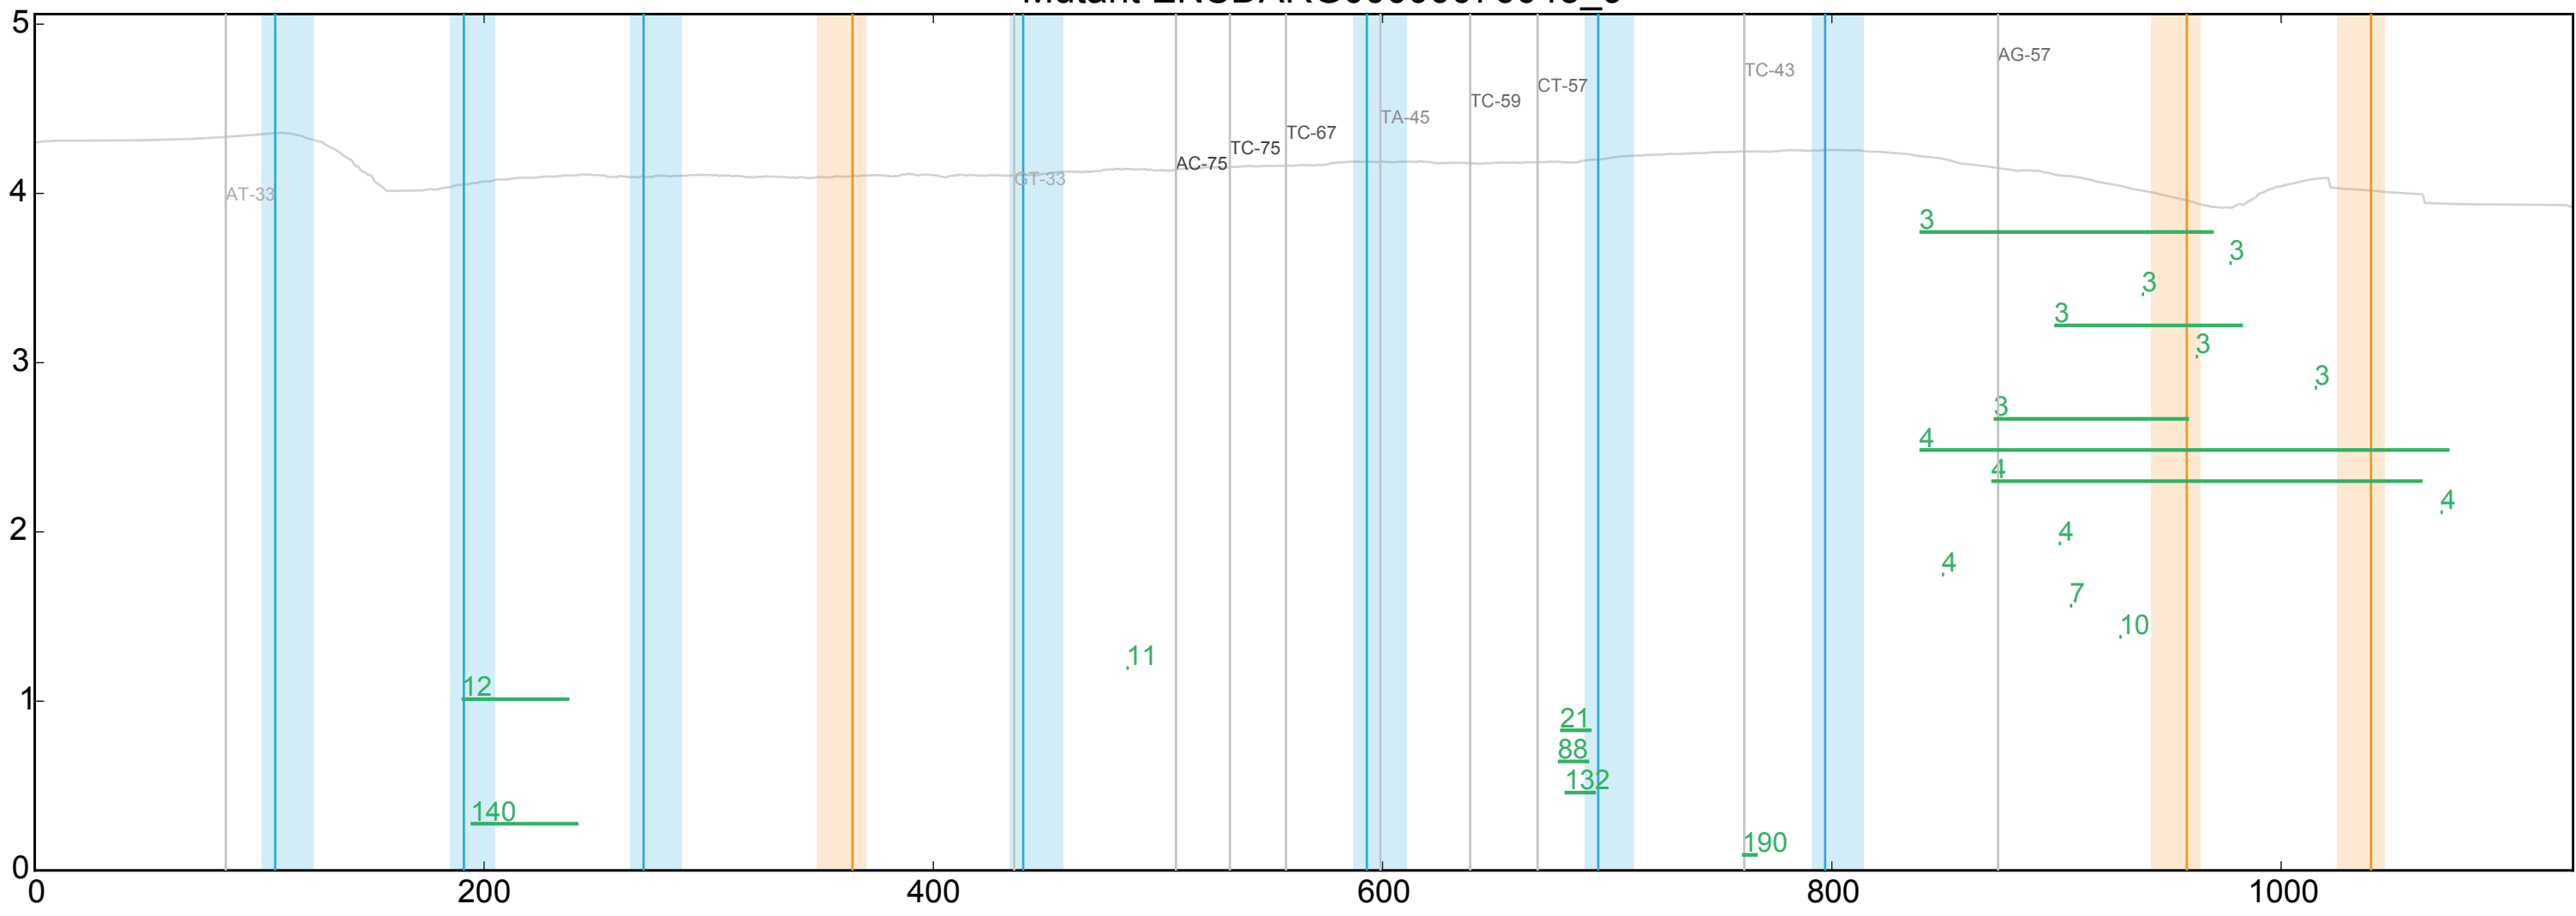

WT ENSDARG00000076045\_9

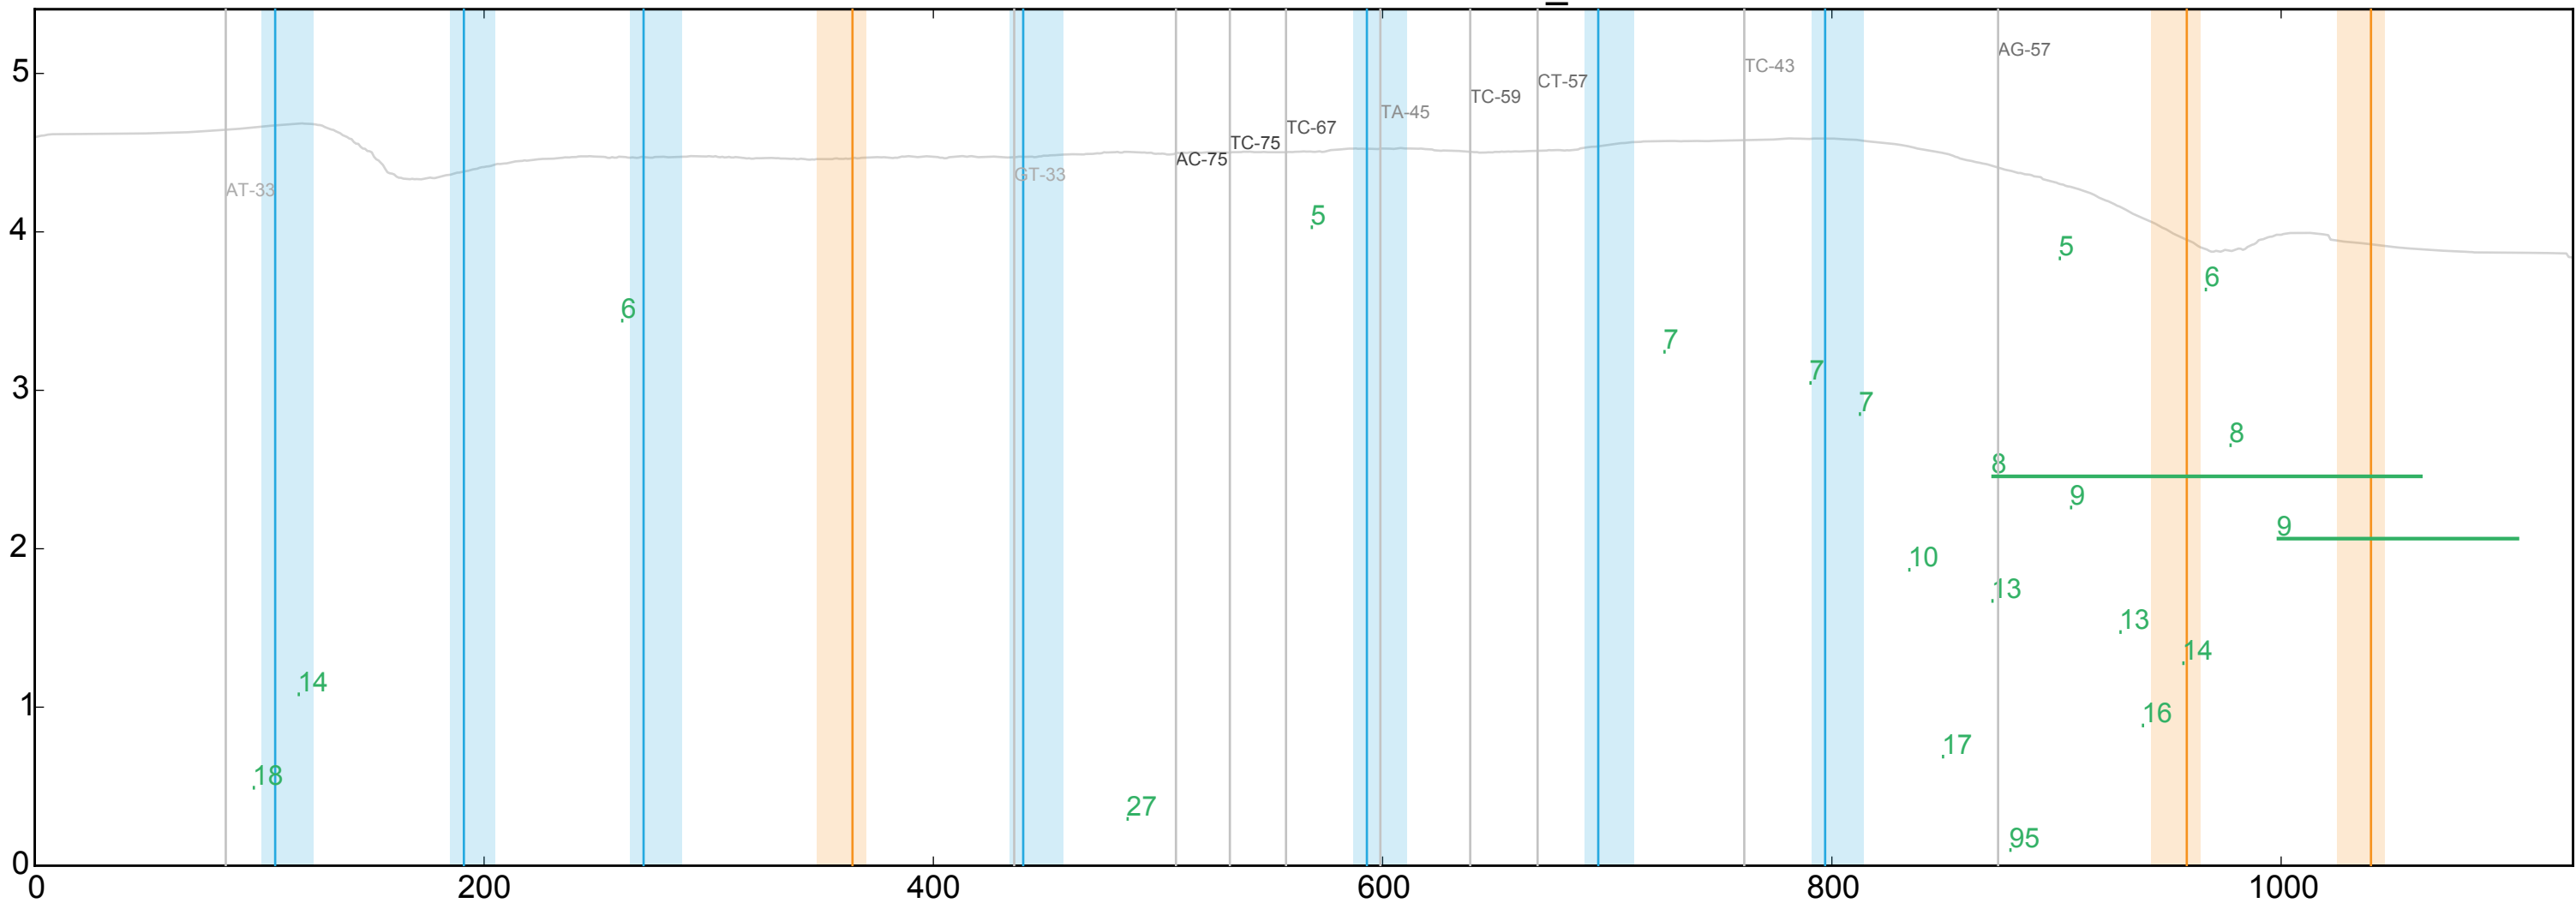



Mutant ENSDARG00000052232\_0

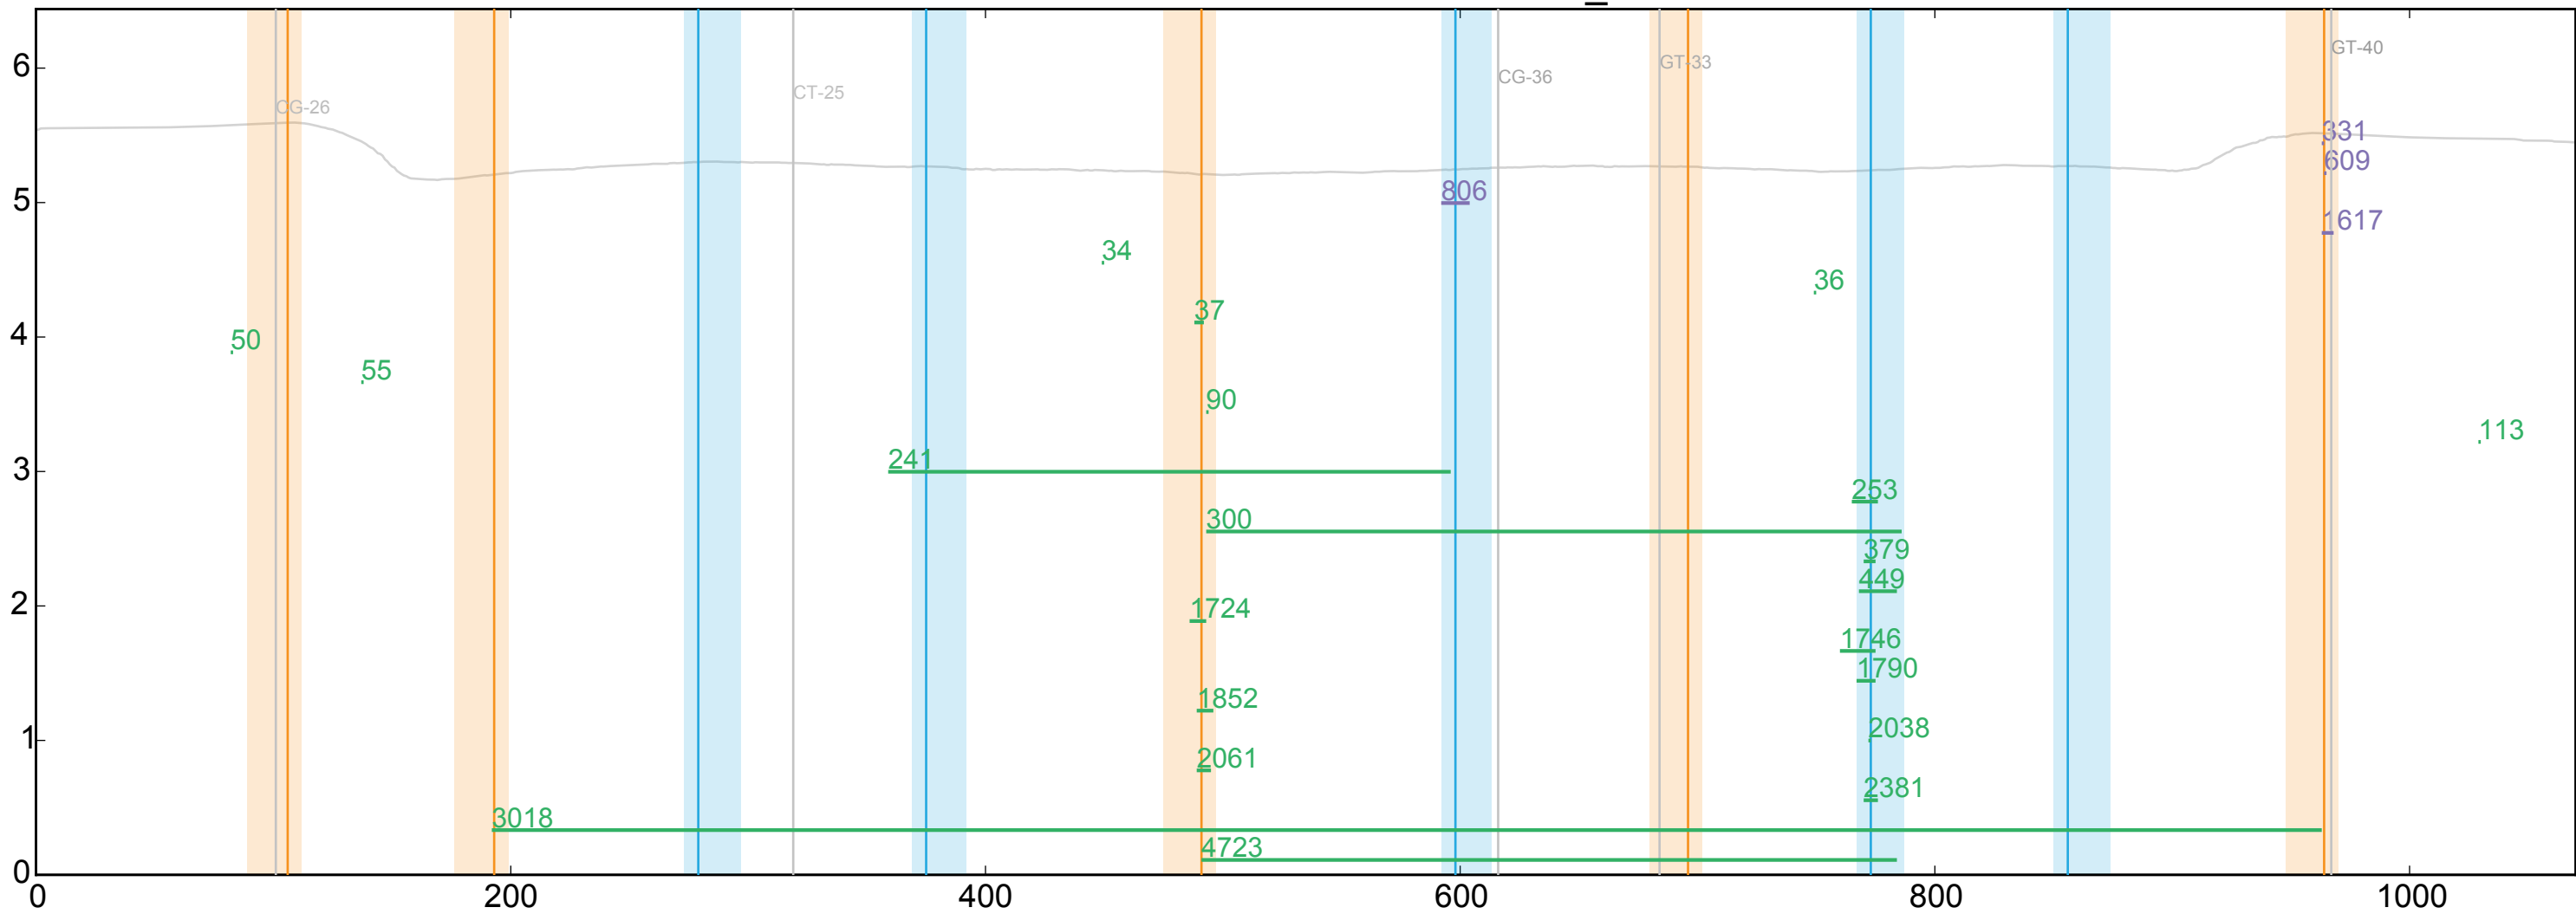

WT ENSDARG00000052232\_0

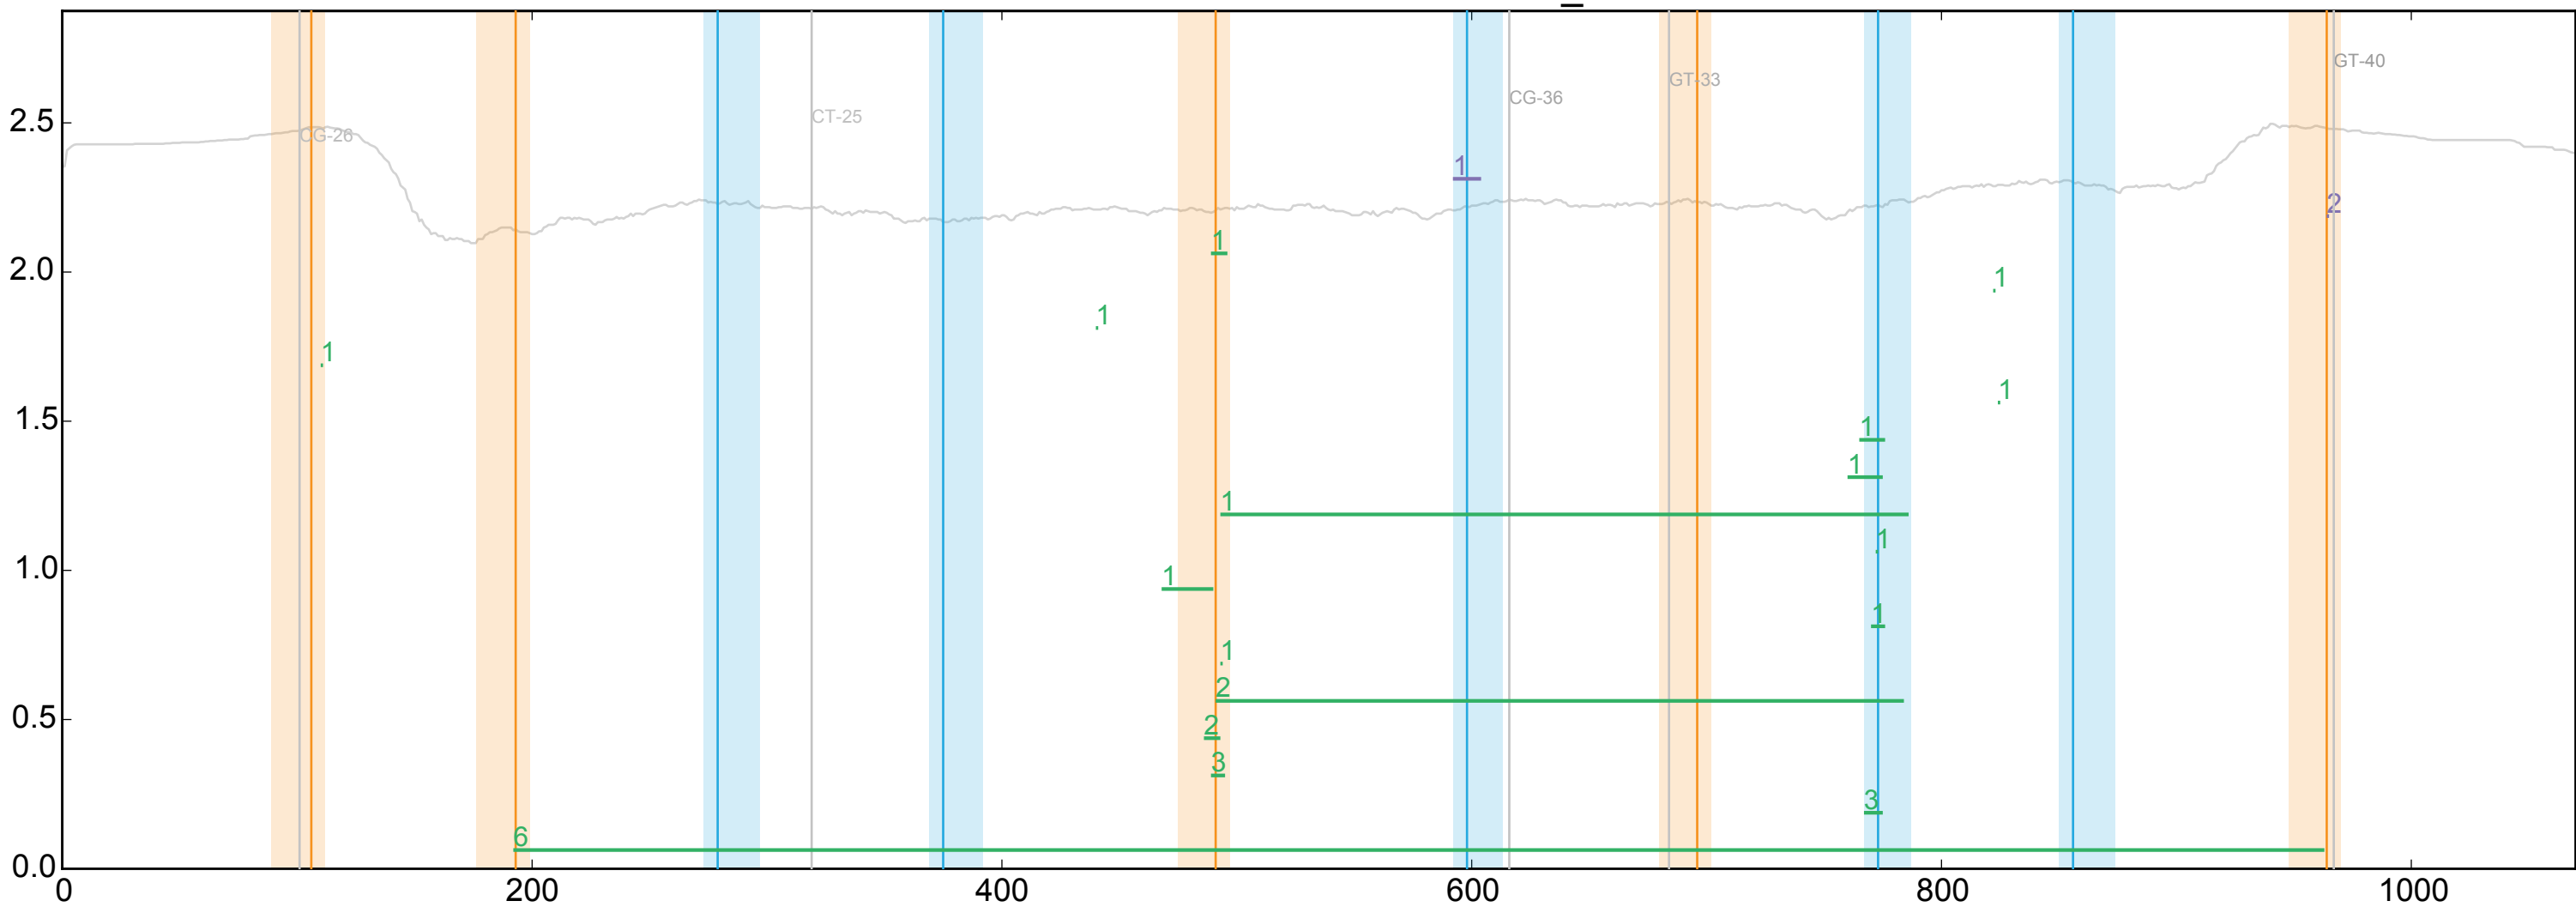

Mutant ENSDARG00000074919\_0

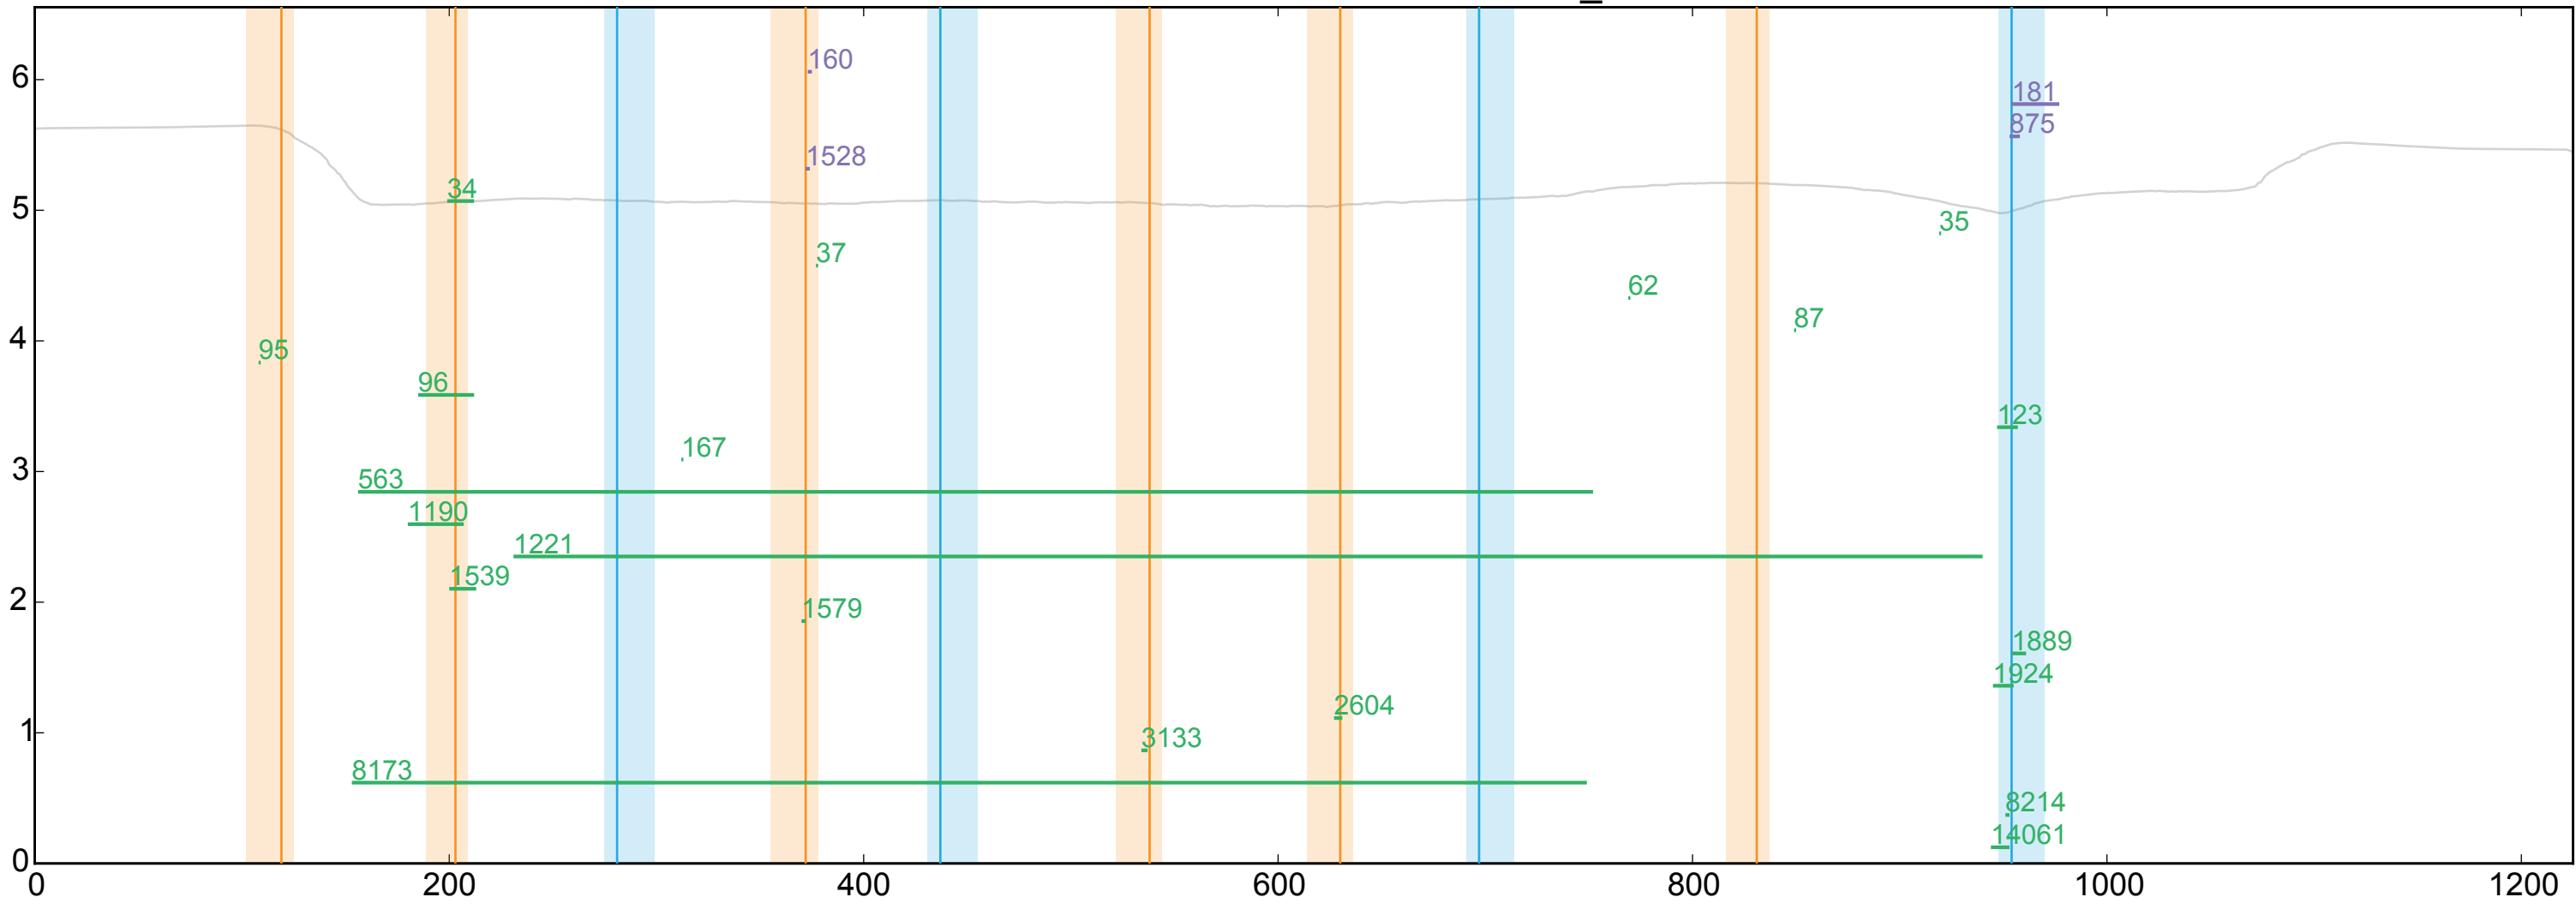

WT ENSDARG00000074919\_0

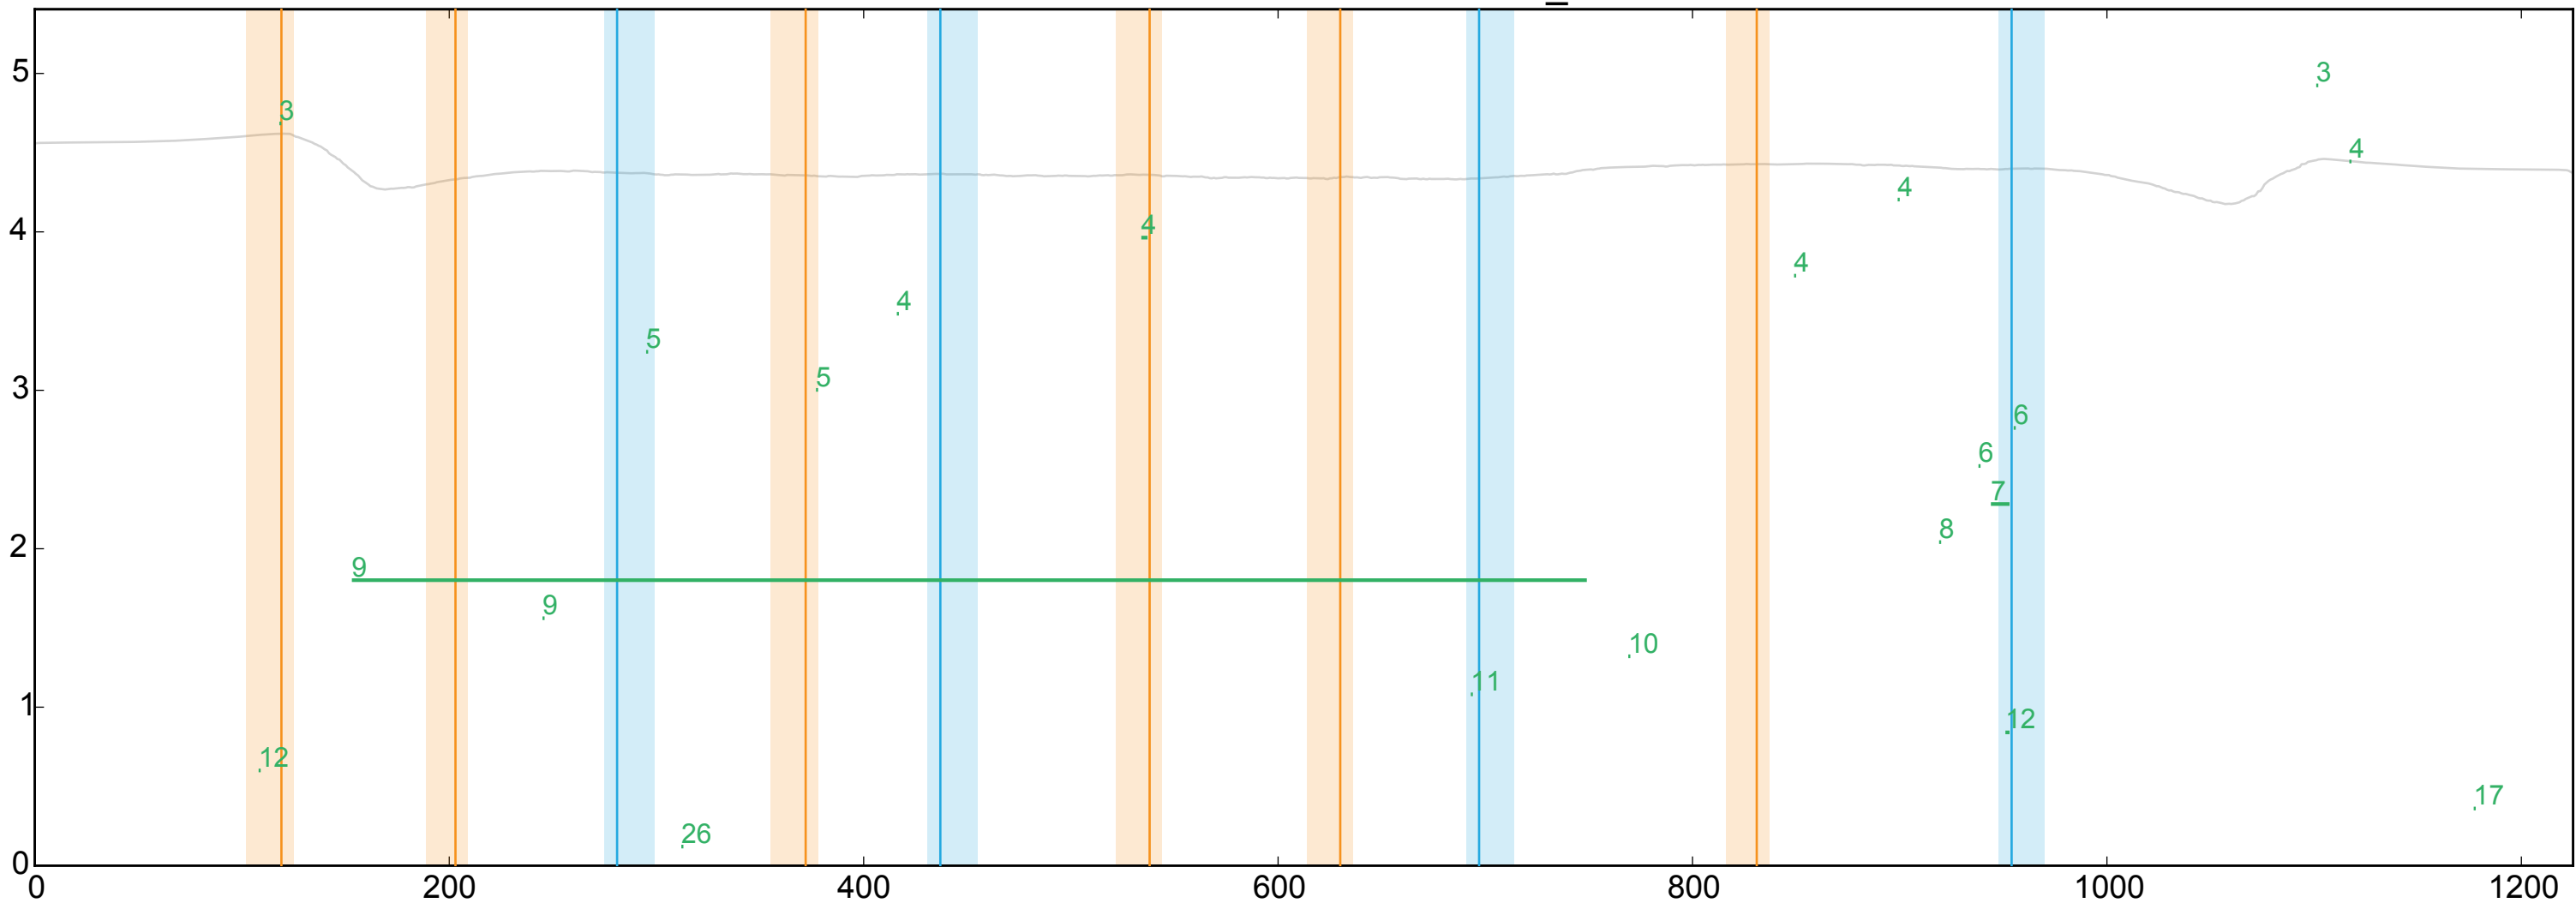

Mutant ENSDARG0000071497\_2

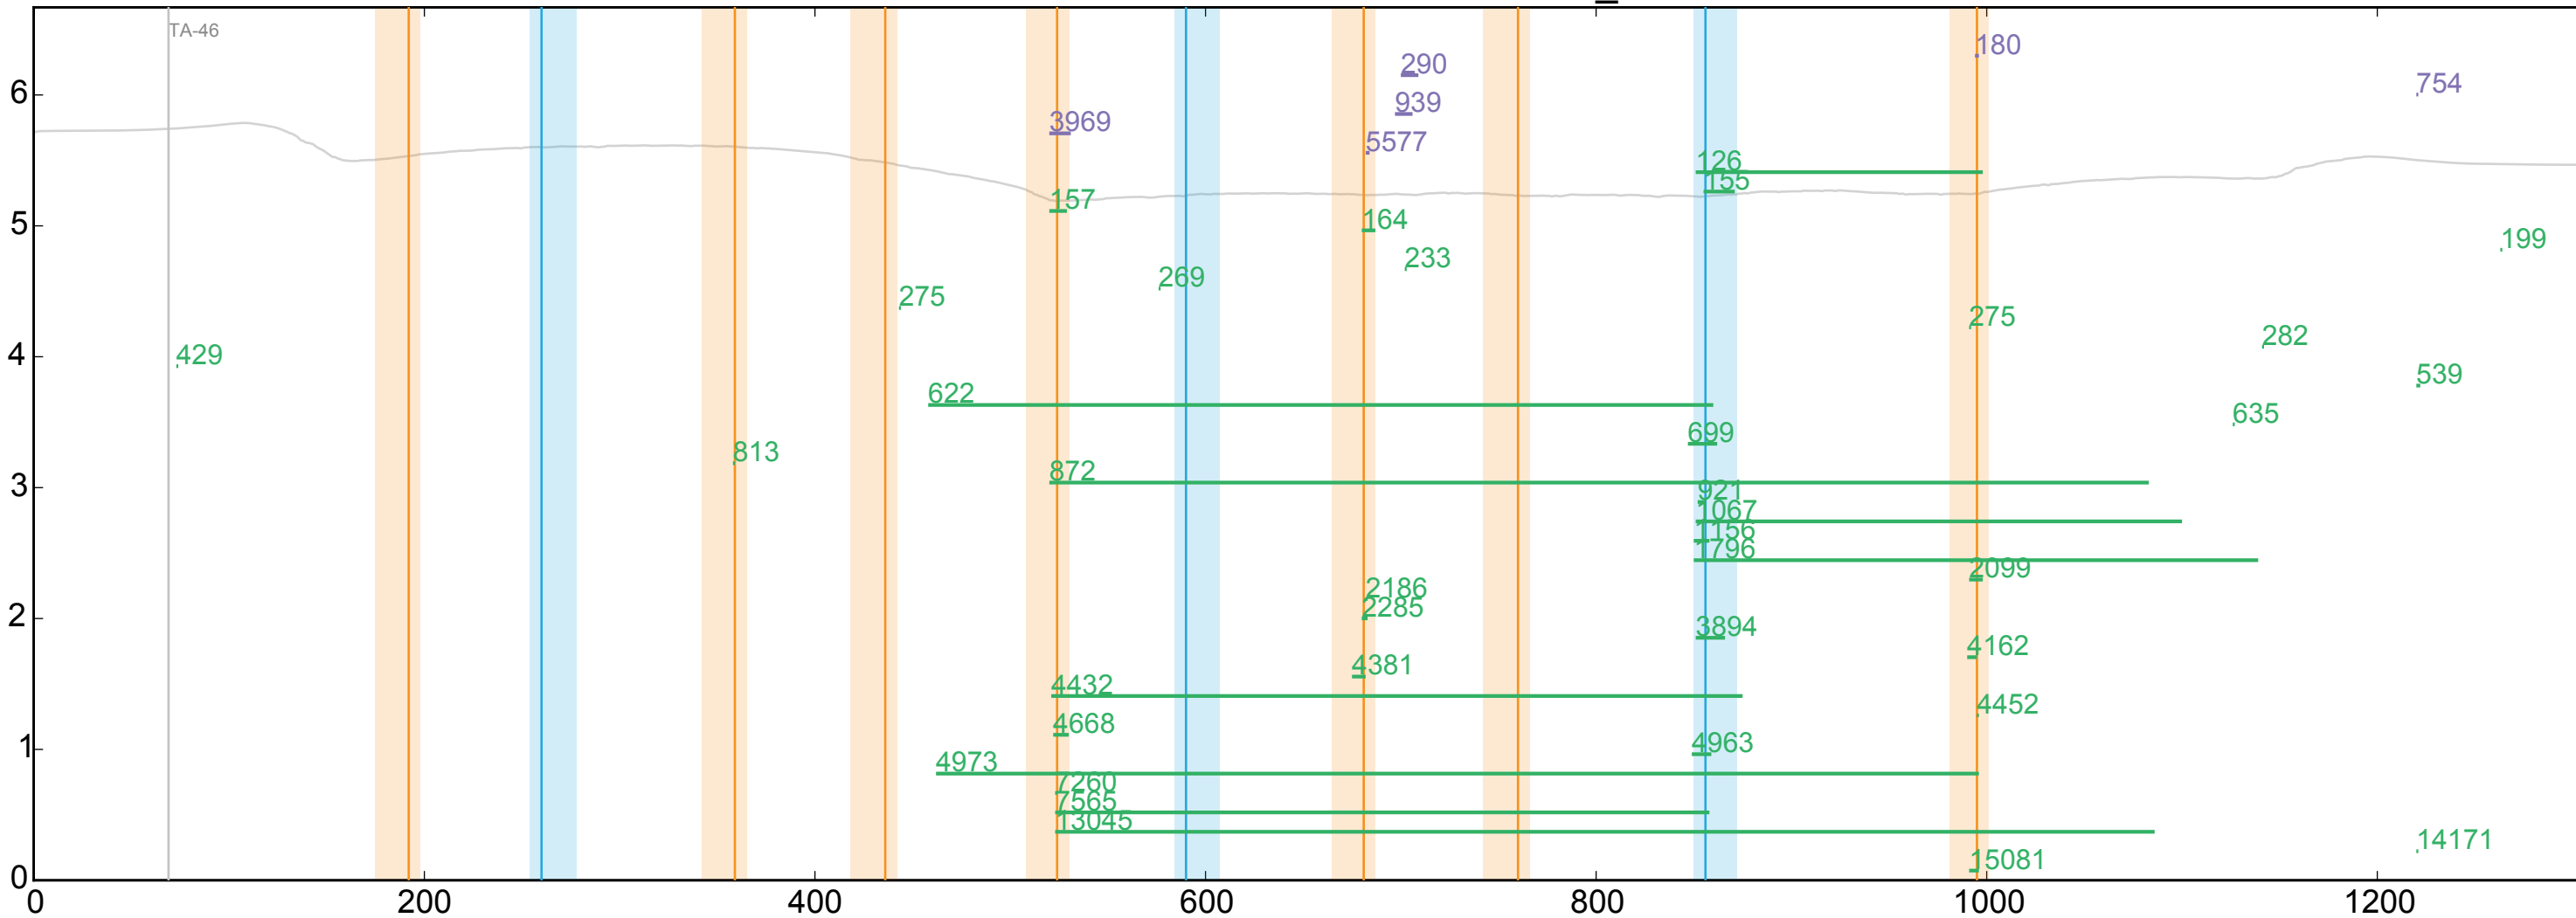

WT ENSDARG0000071497\_2

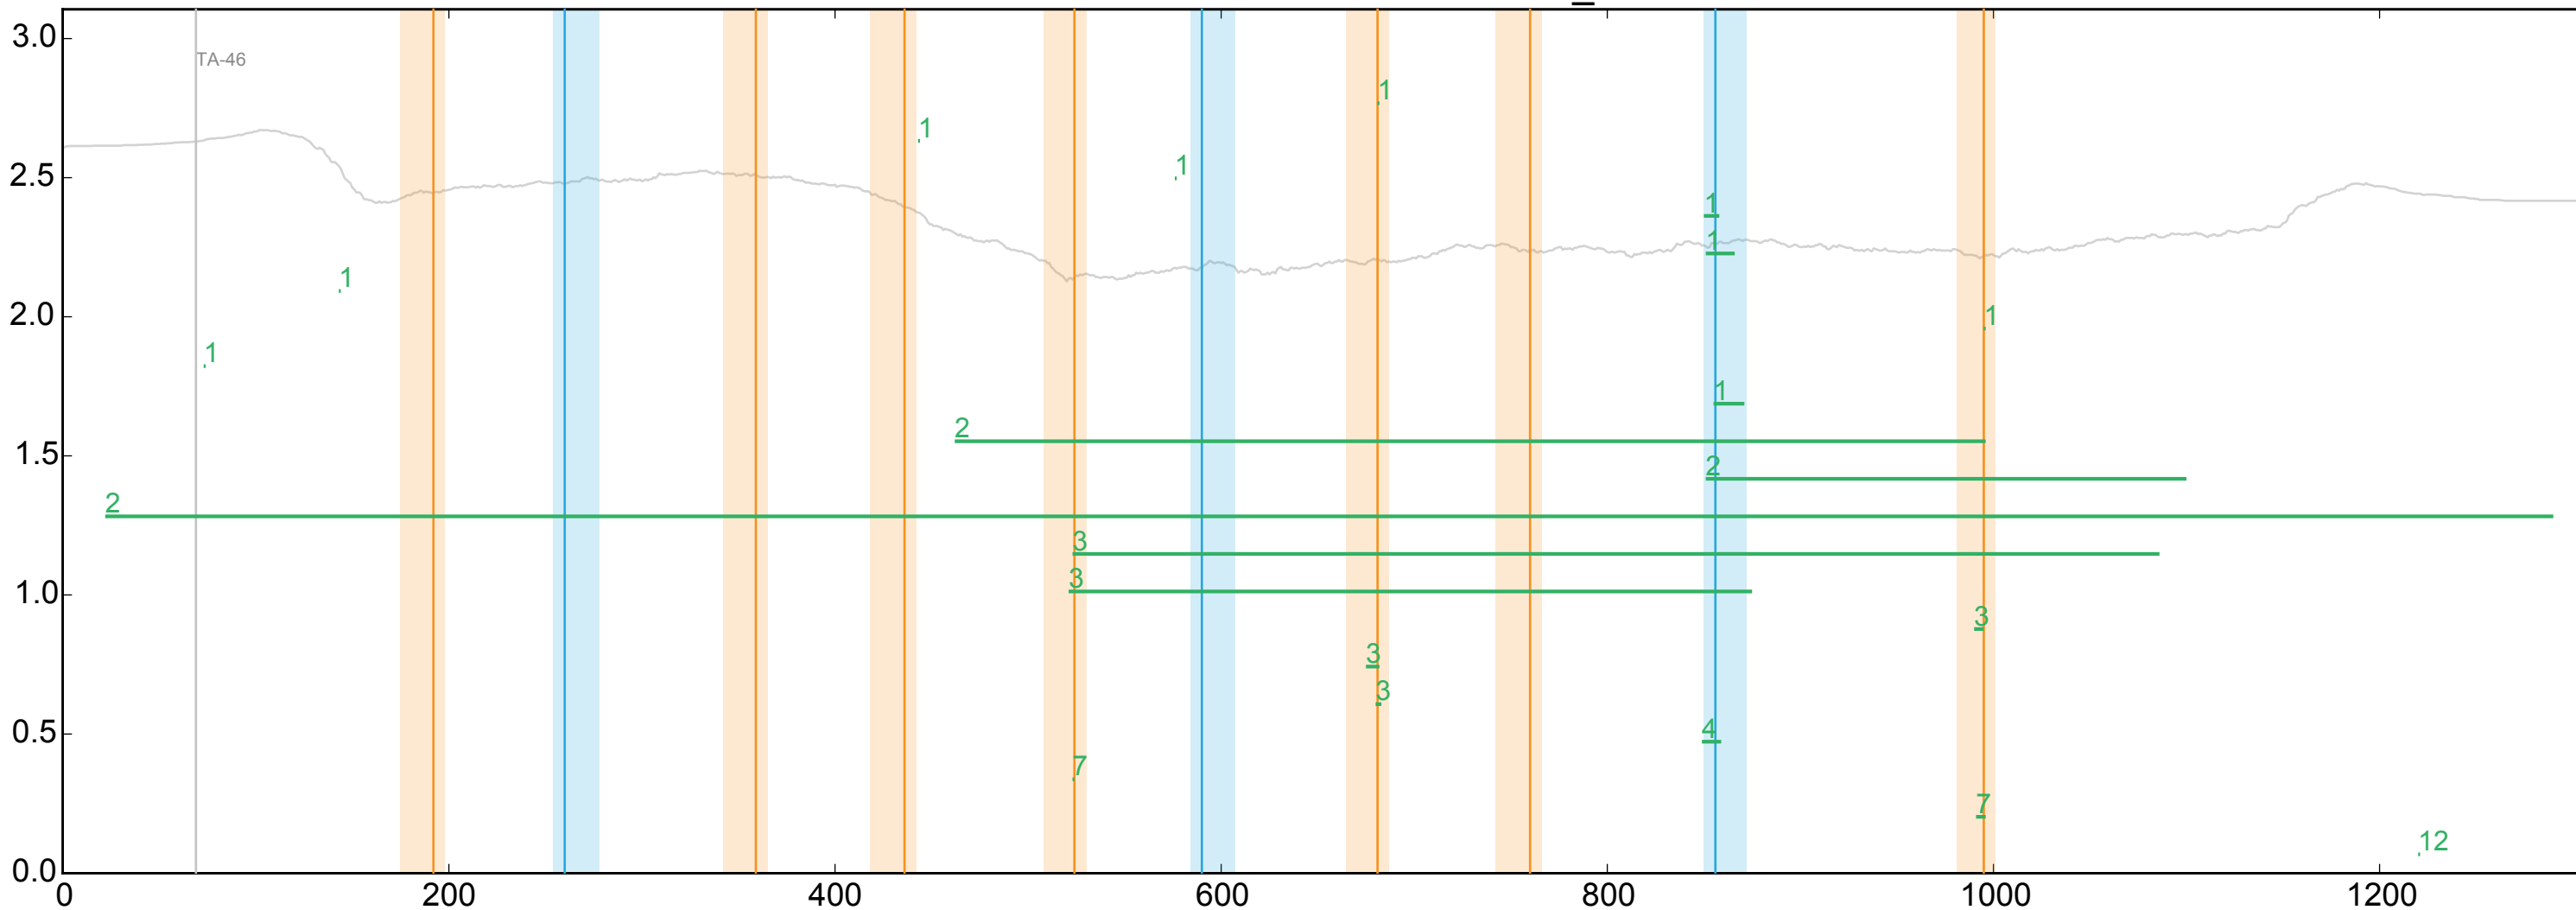

Mutant ENSDARG0000068397\_9

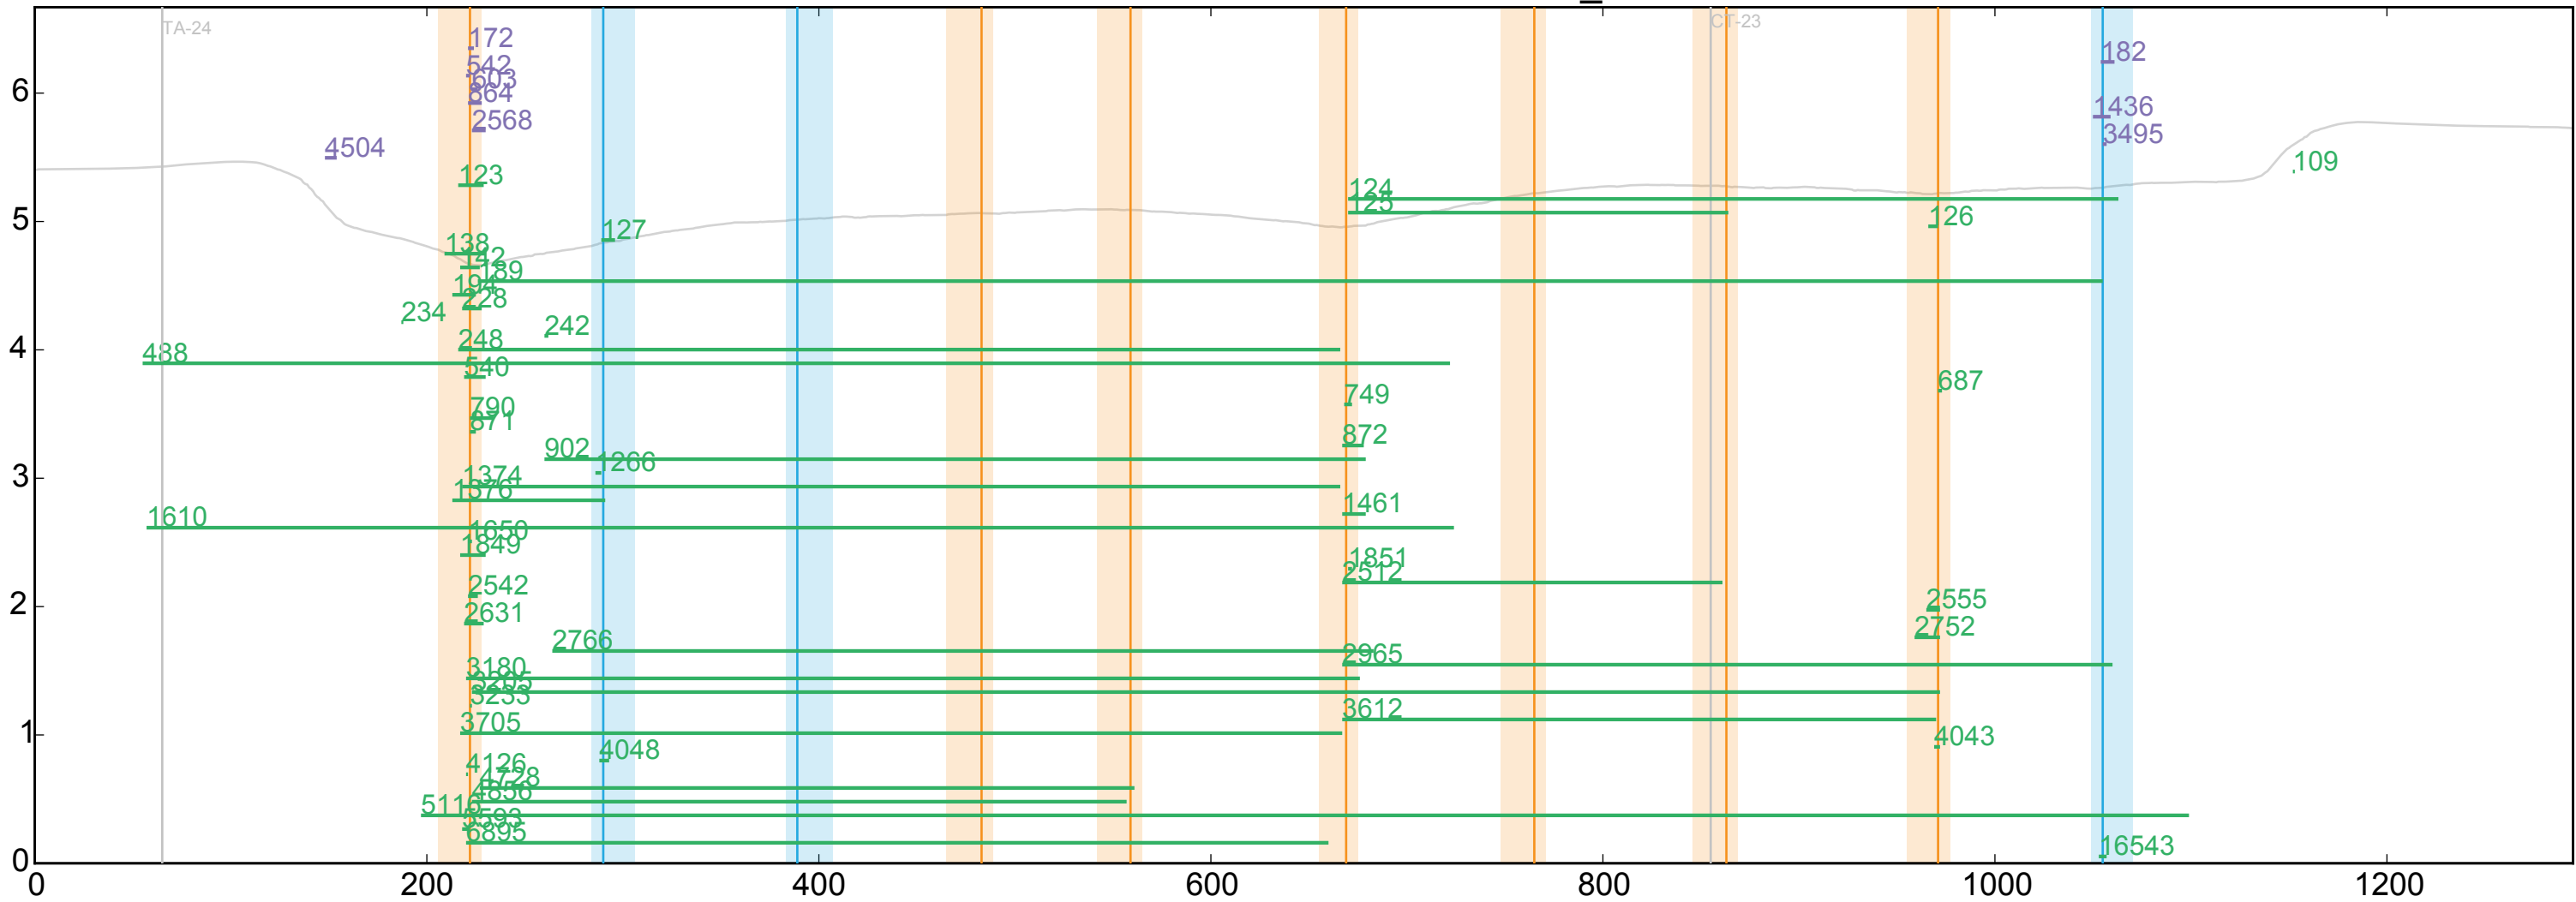

WT ENSDARG0000068397\_9

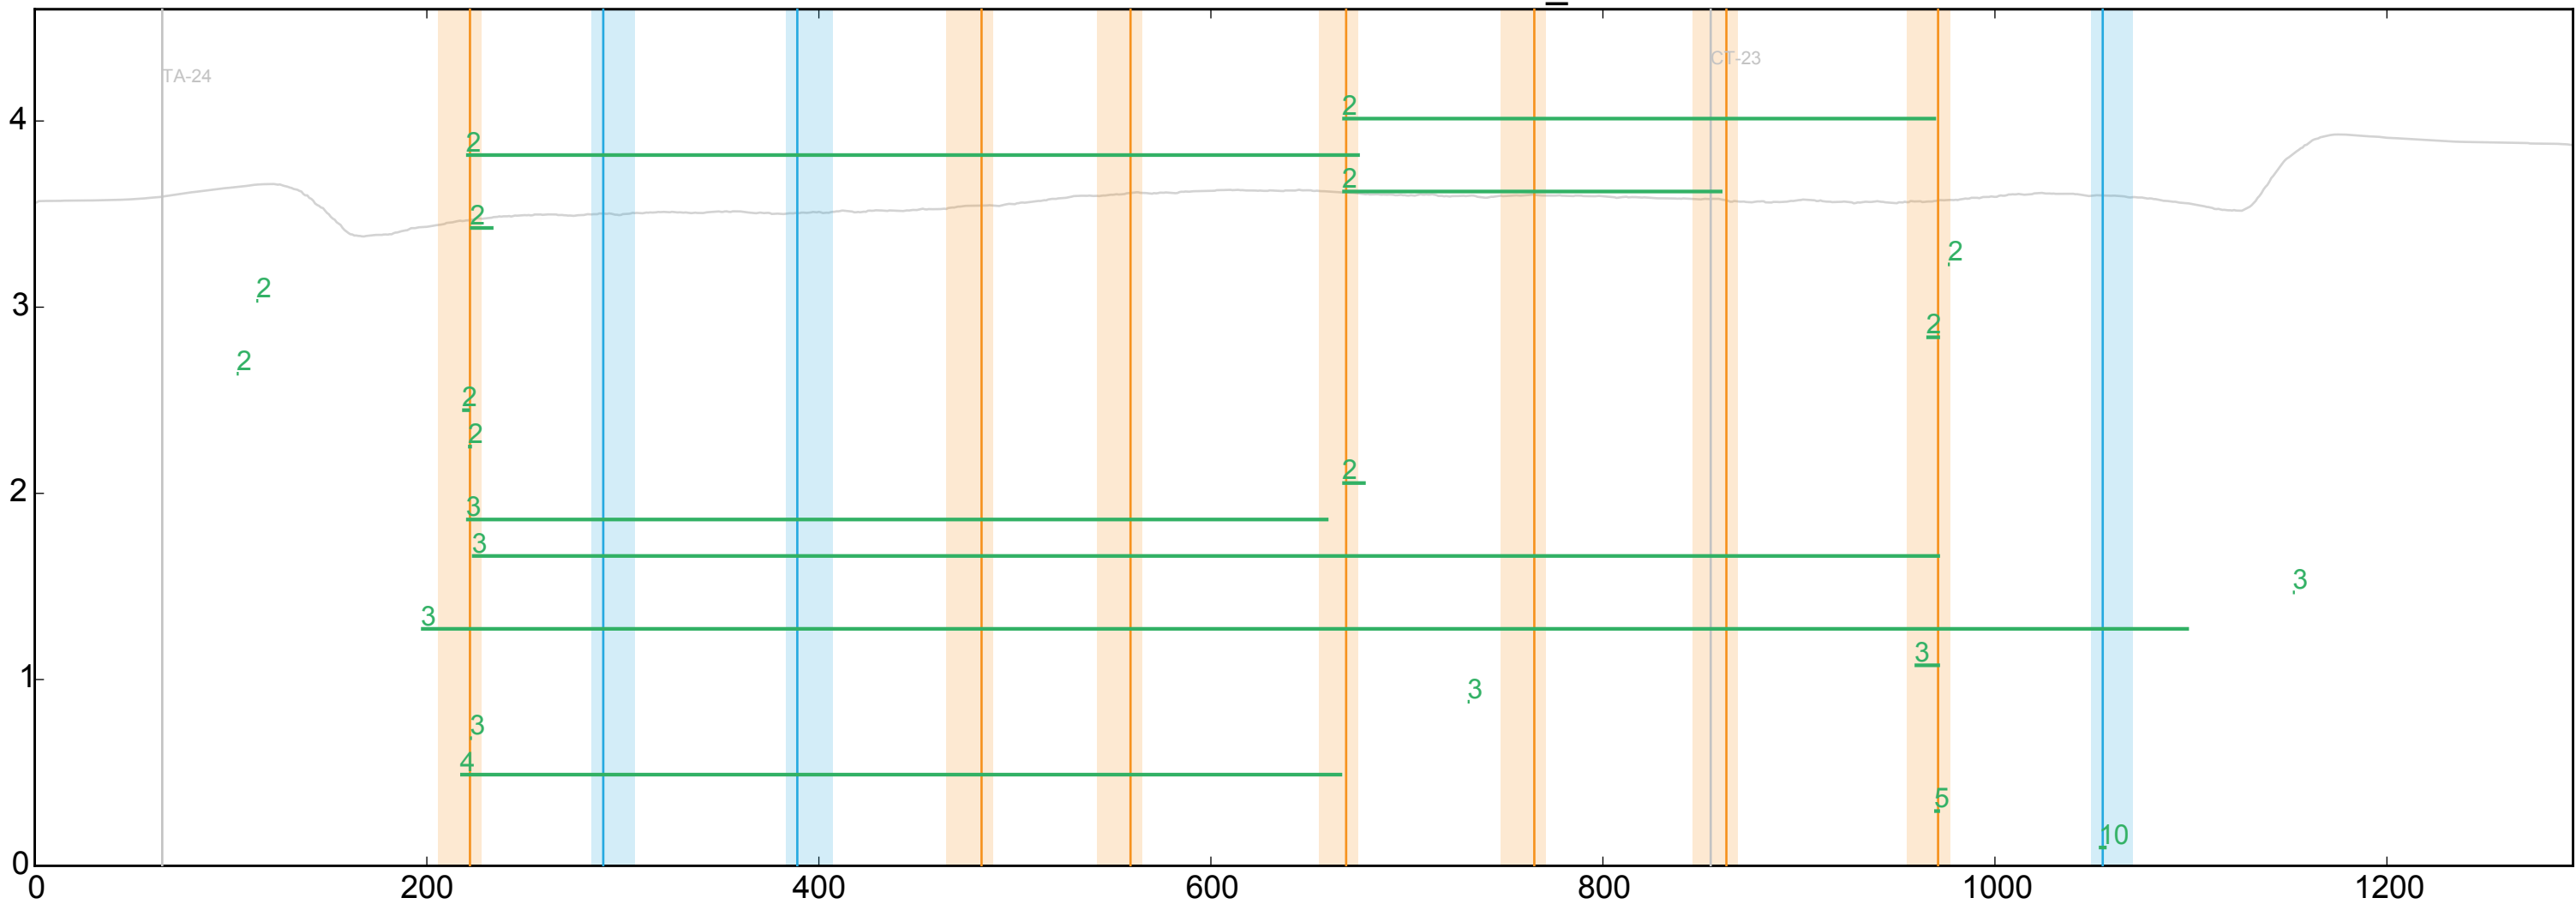

Mutant ENSDARG00000044671\_0

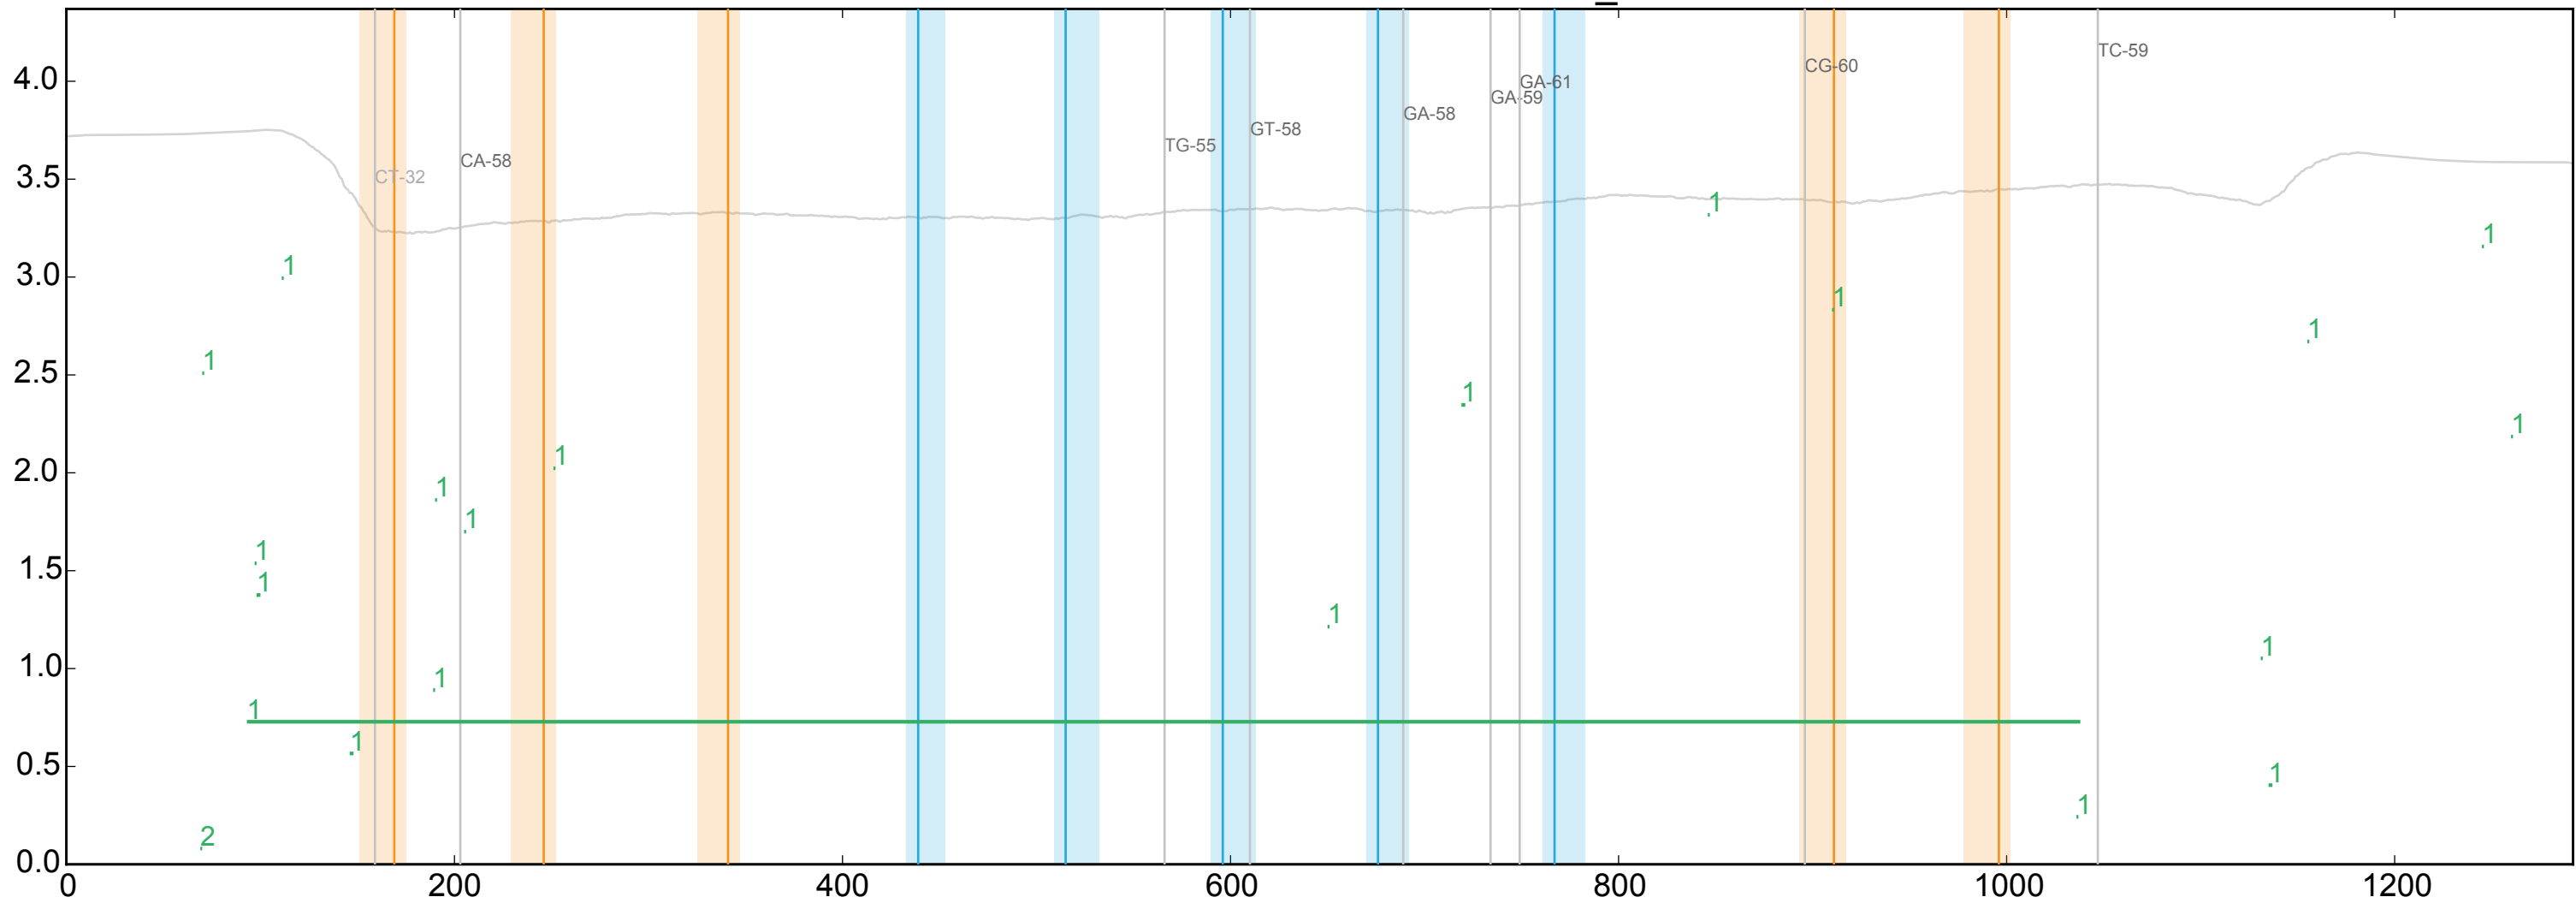

WT ENSDARG00000044671\_0

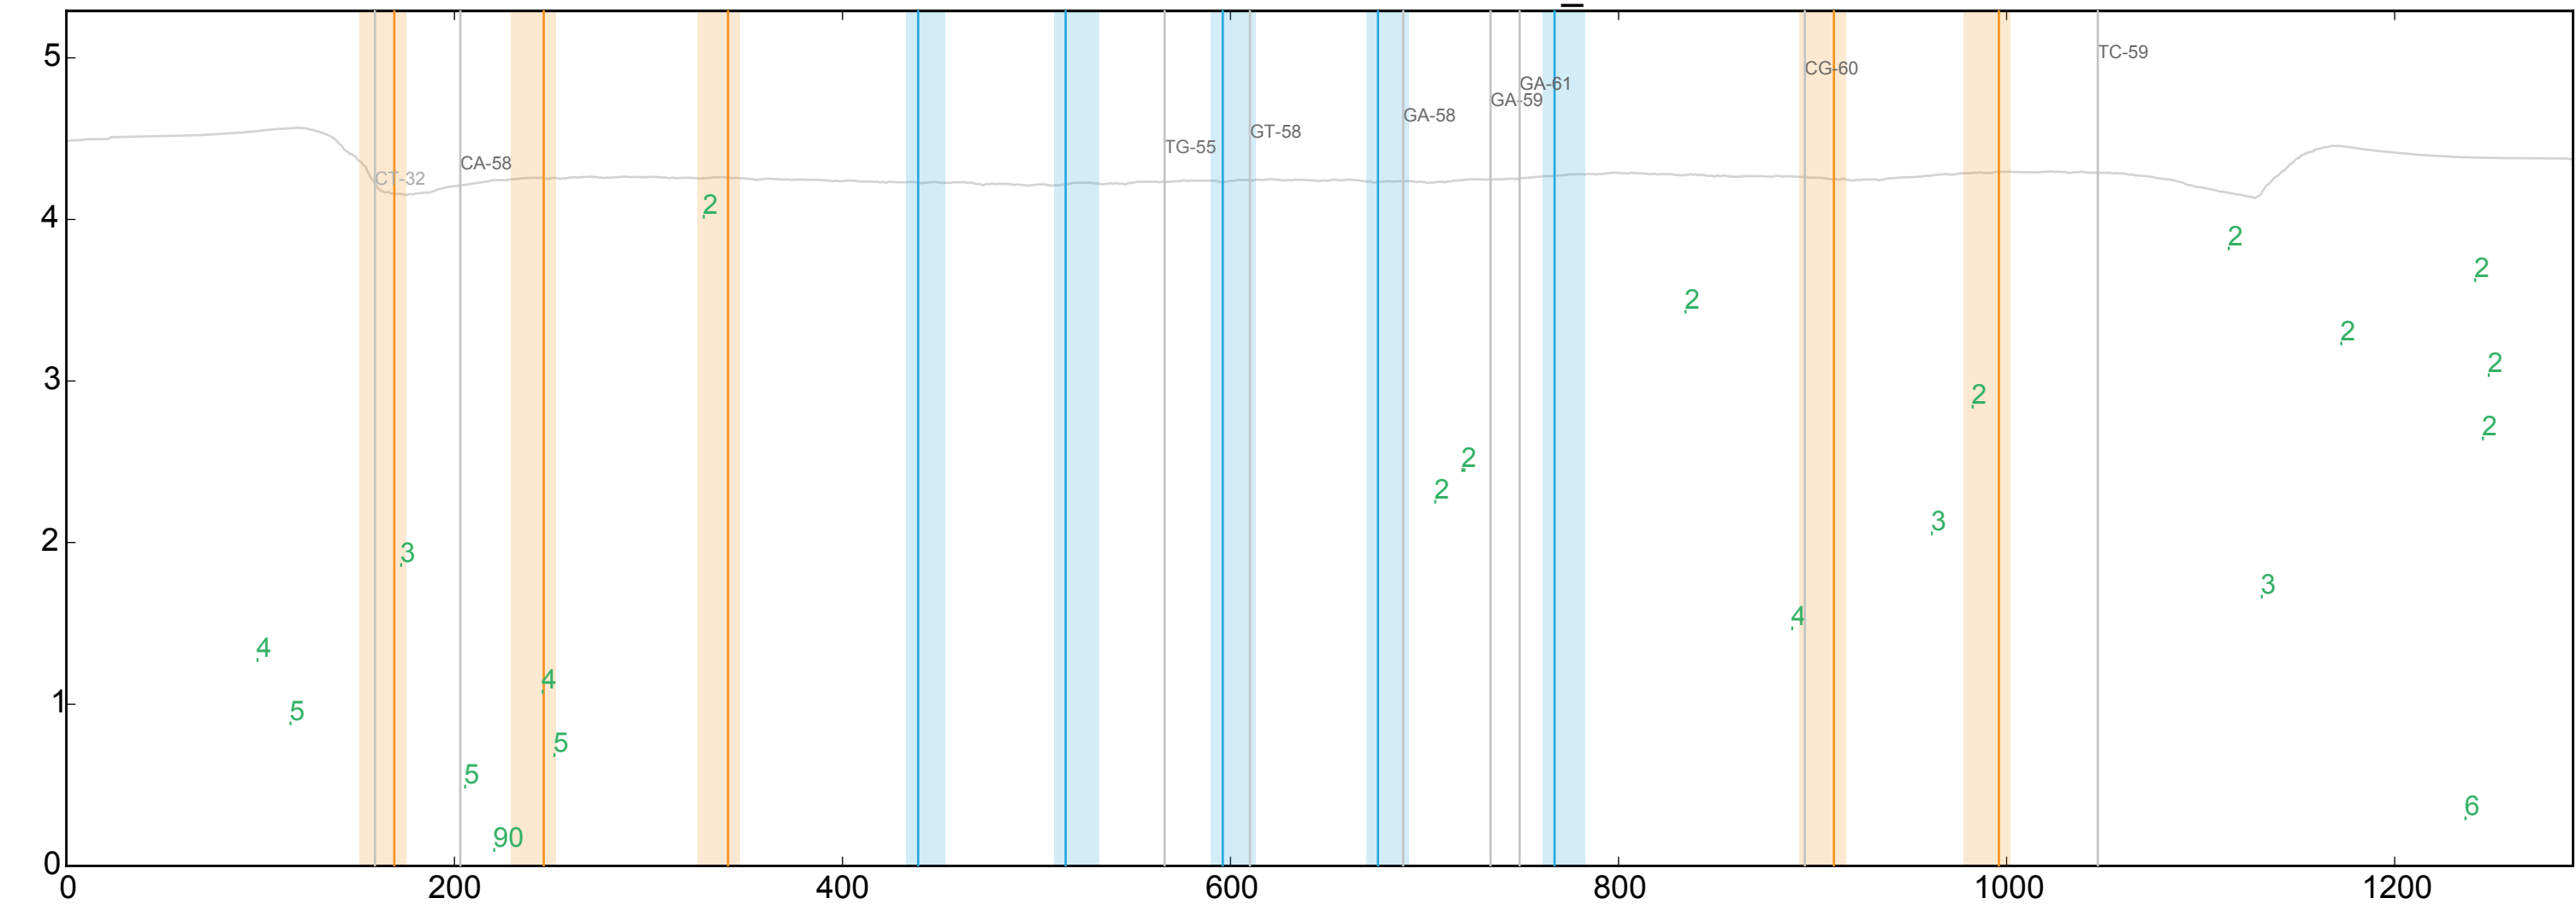

Mutant ENSDARG00000036245\_3

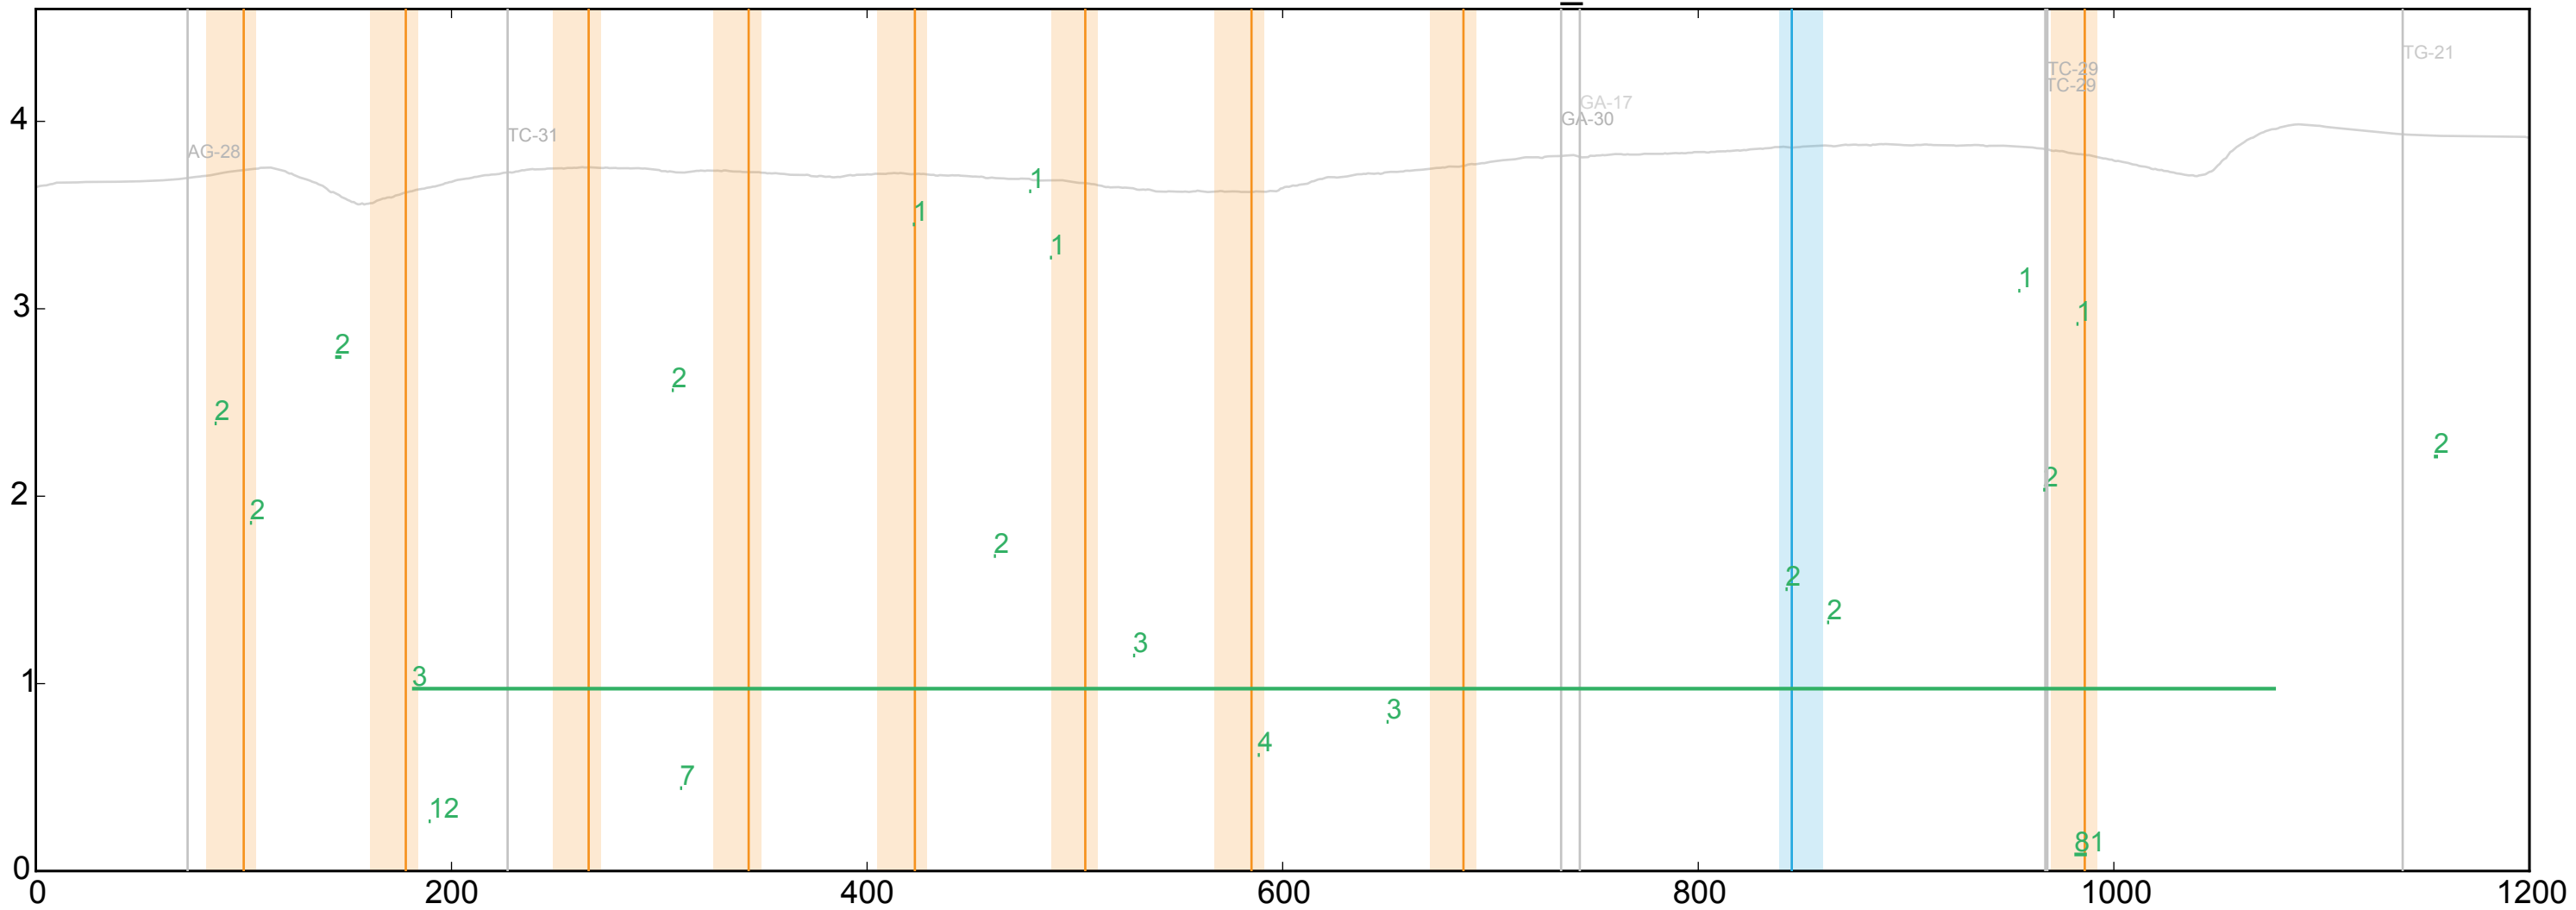

WT ENSDARG00000036245\_3

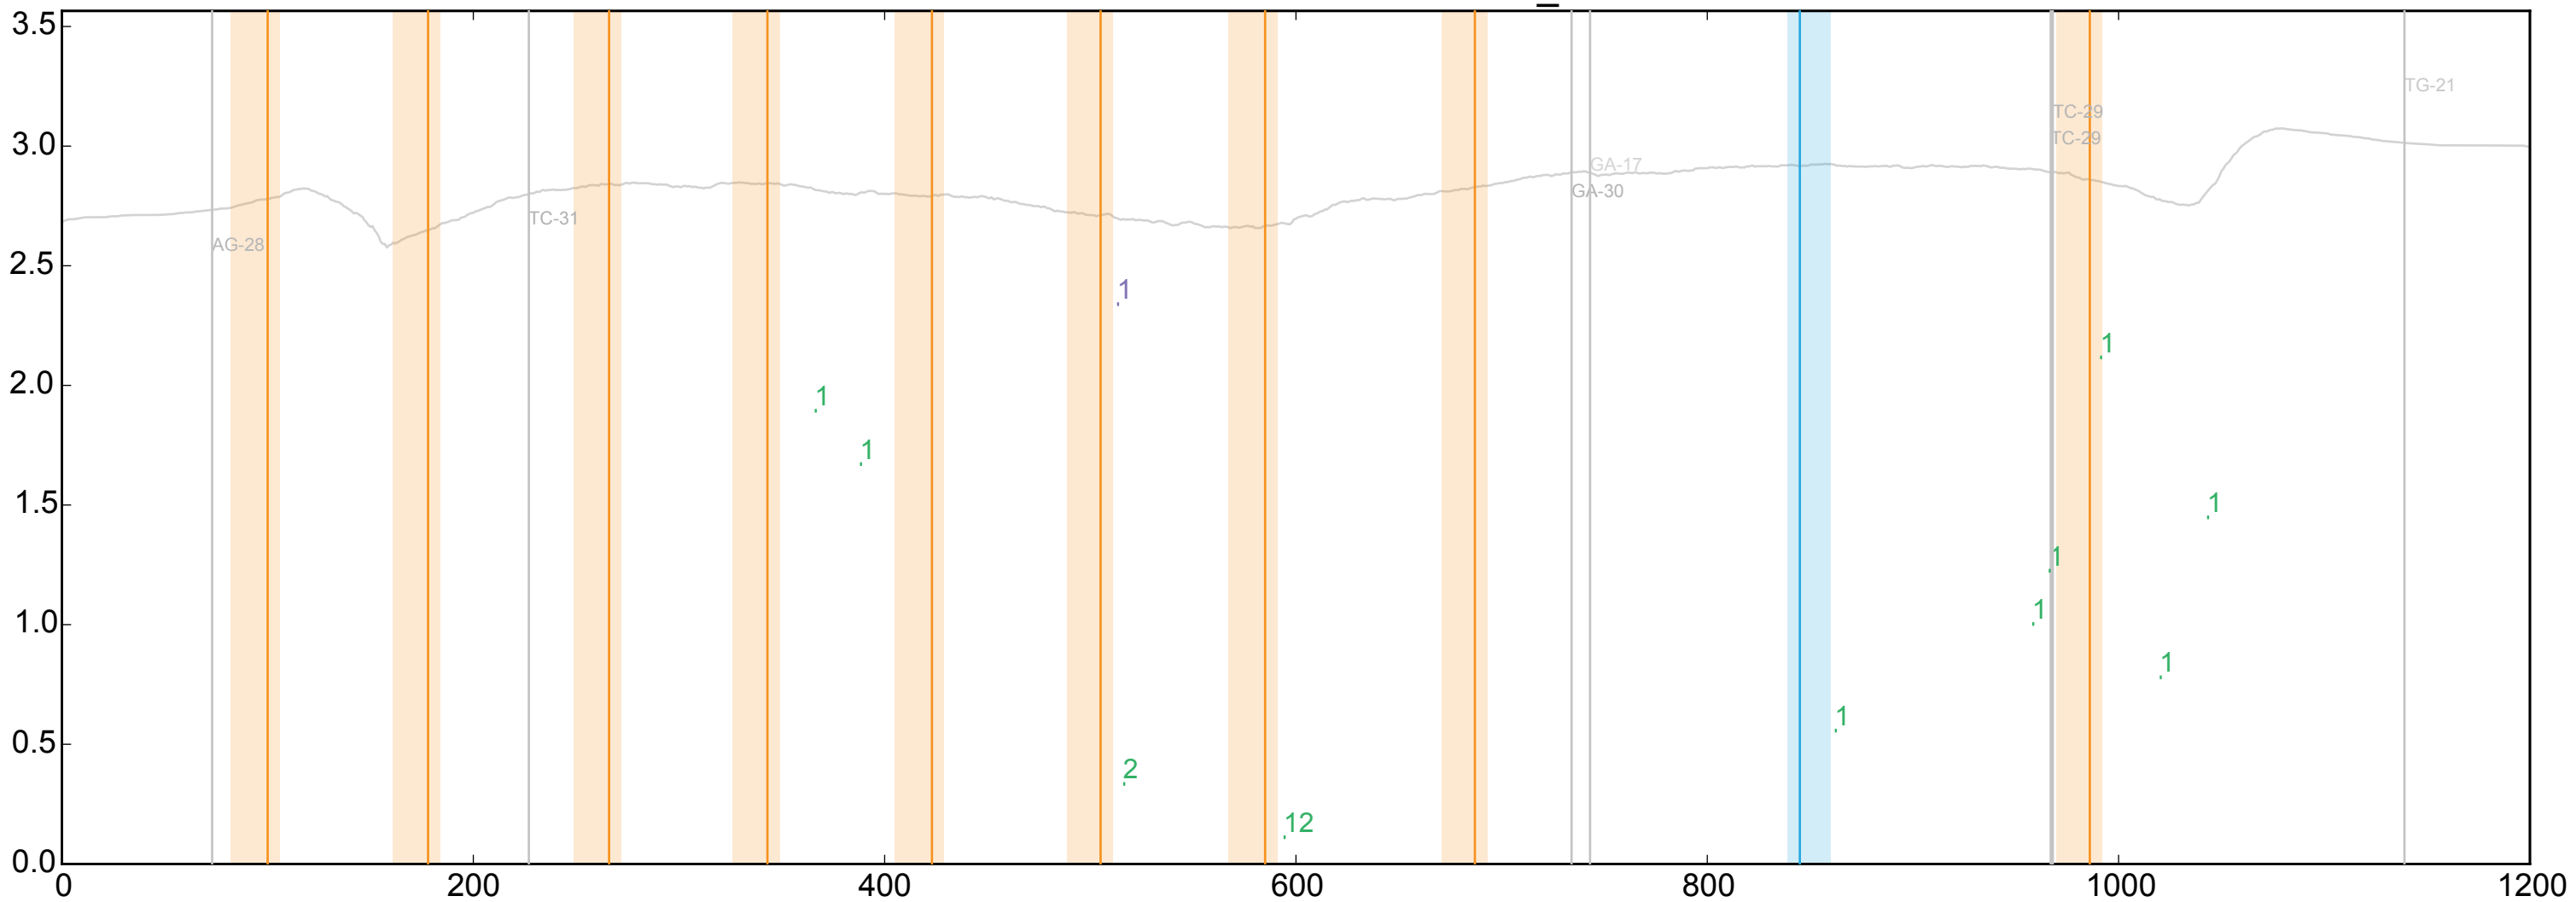

Mutant ENSDARG0000004377\_4

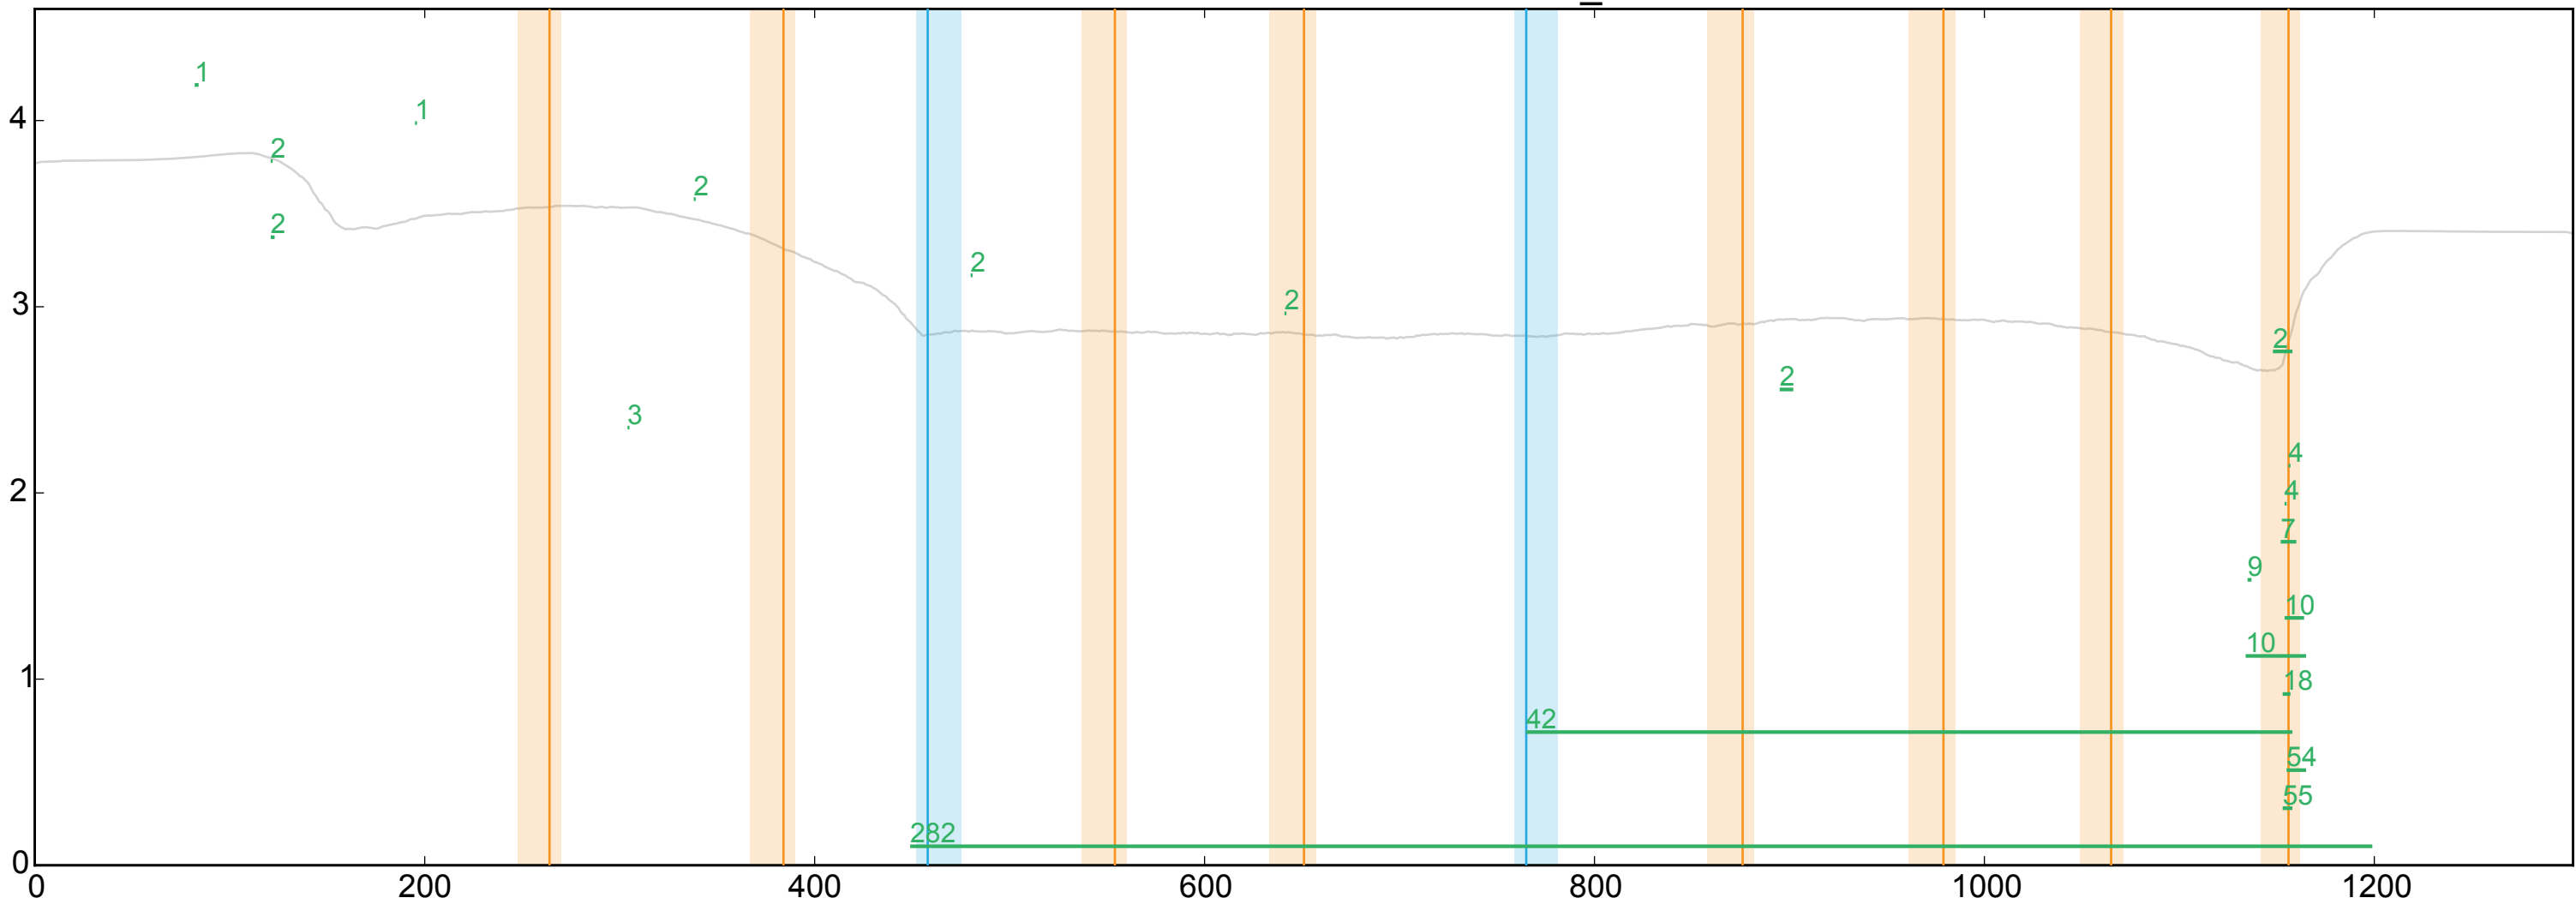

WT ENSDARG0000004377\_4

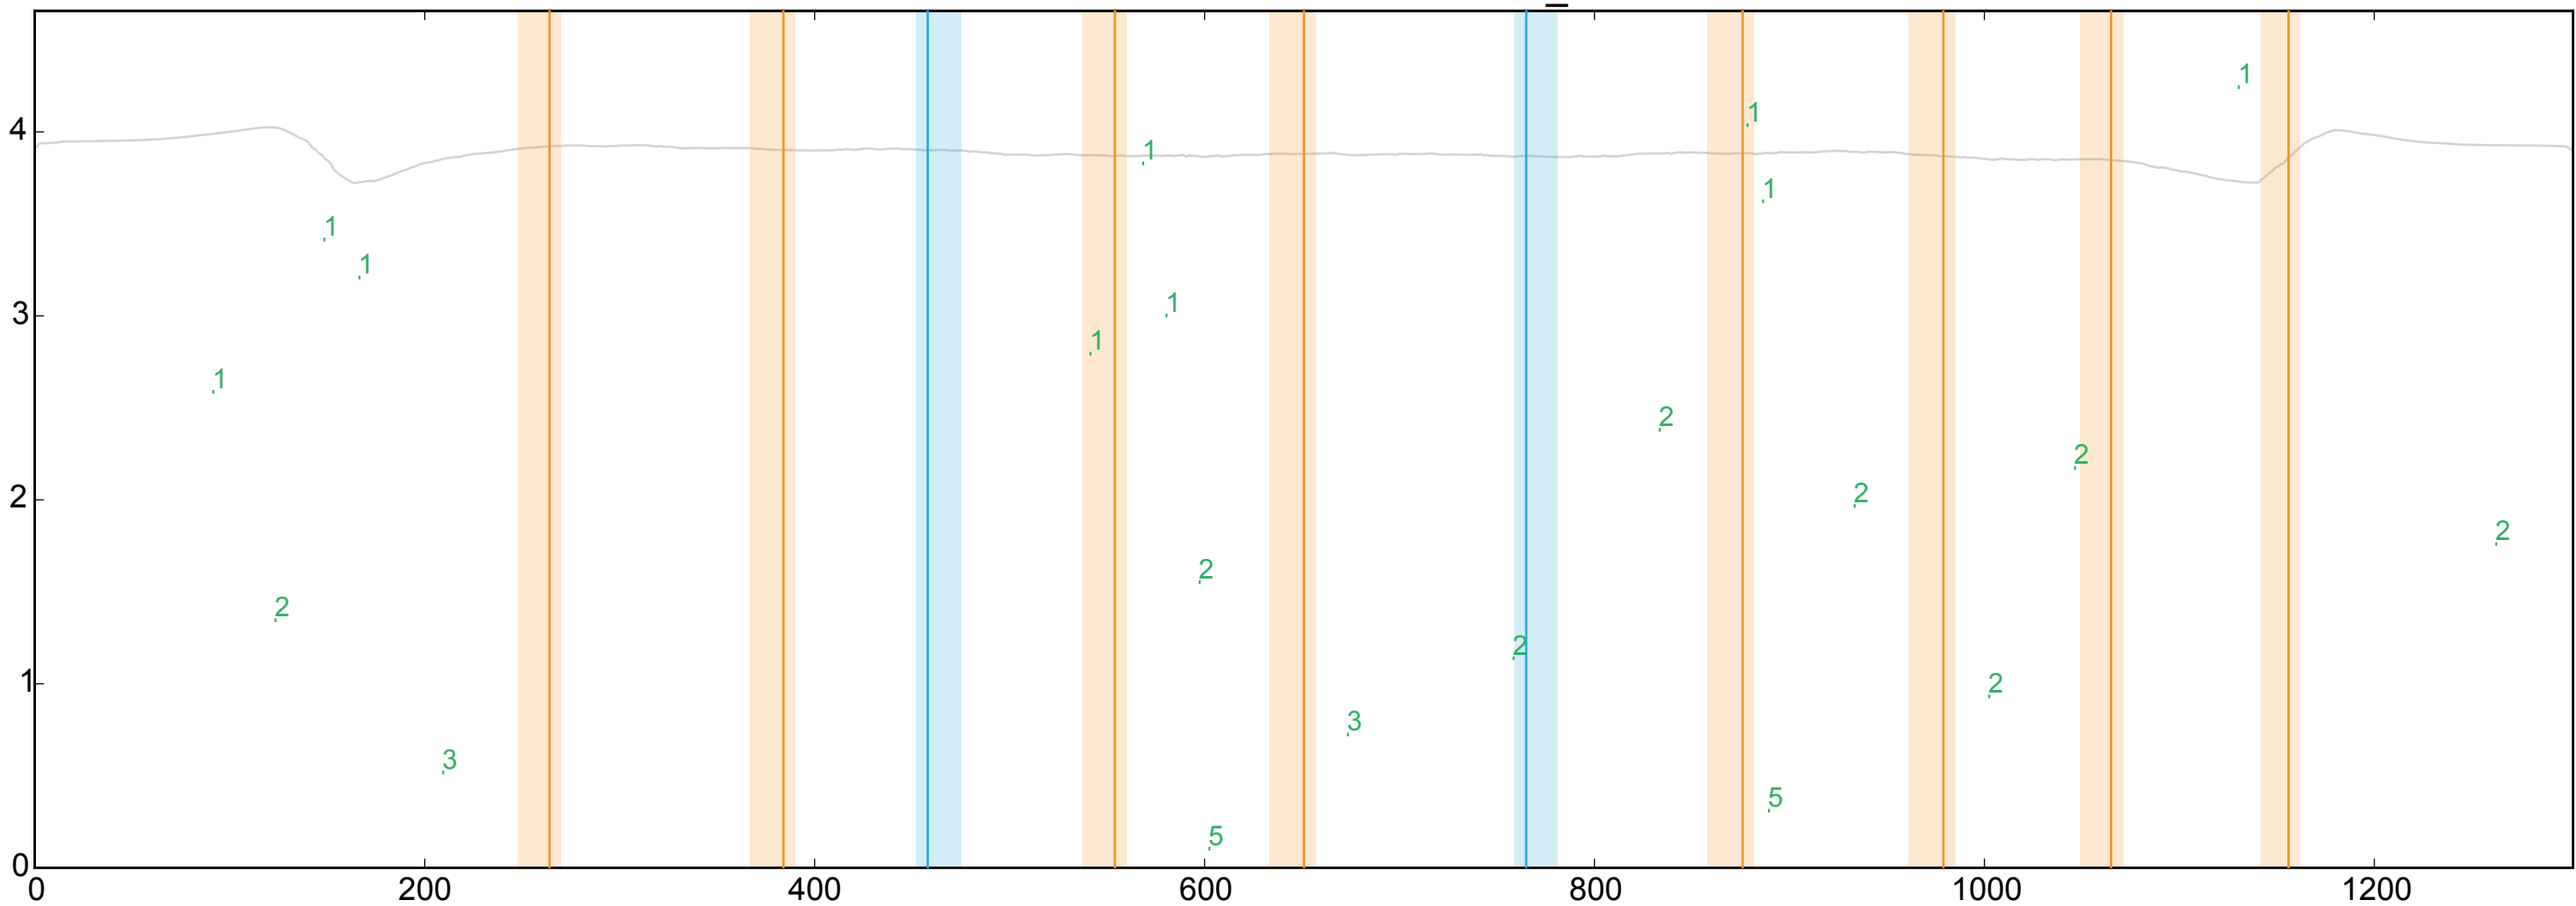

Mutant ENSDARG00000035563\_0

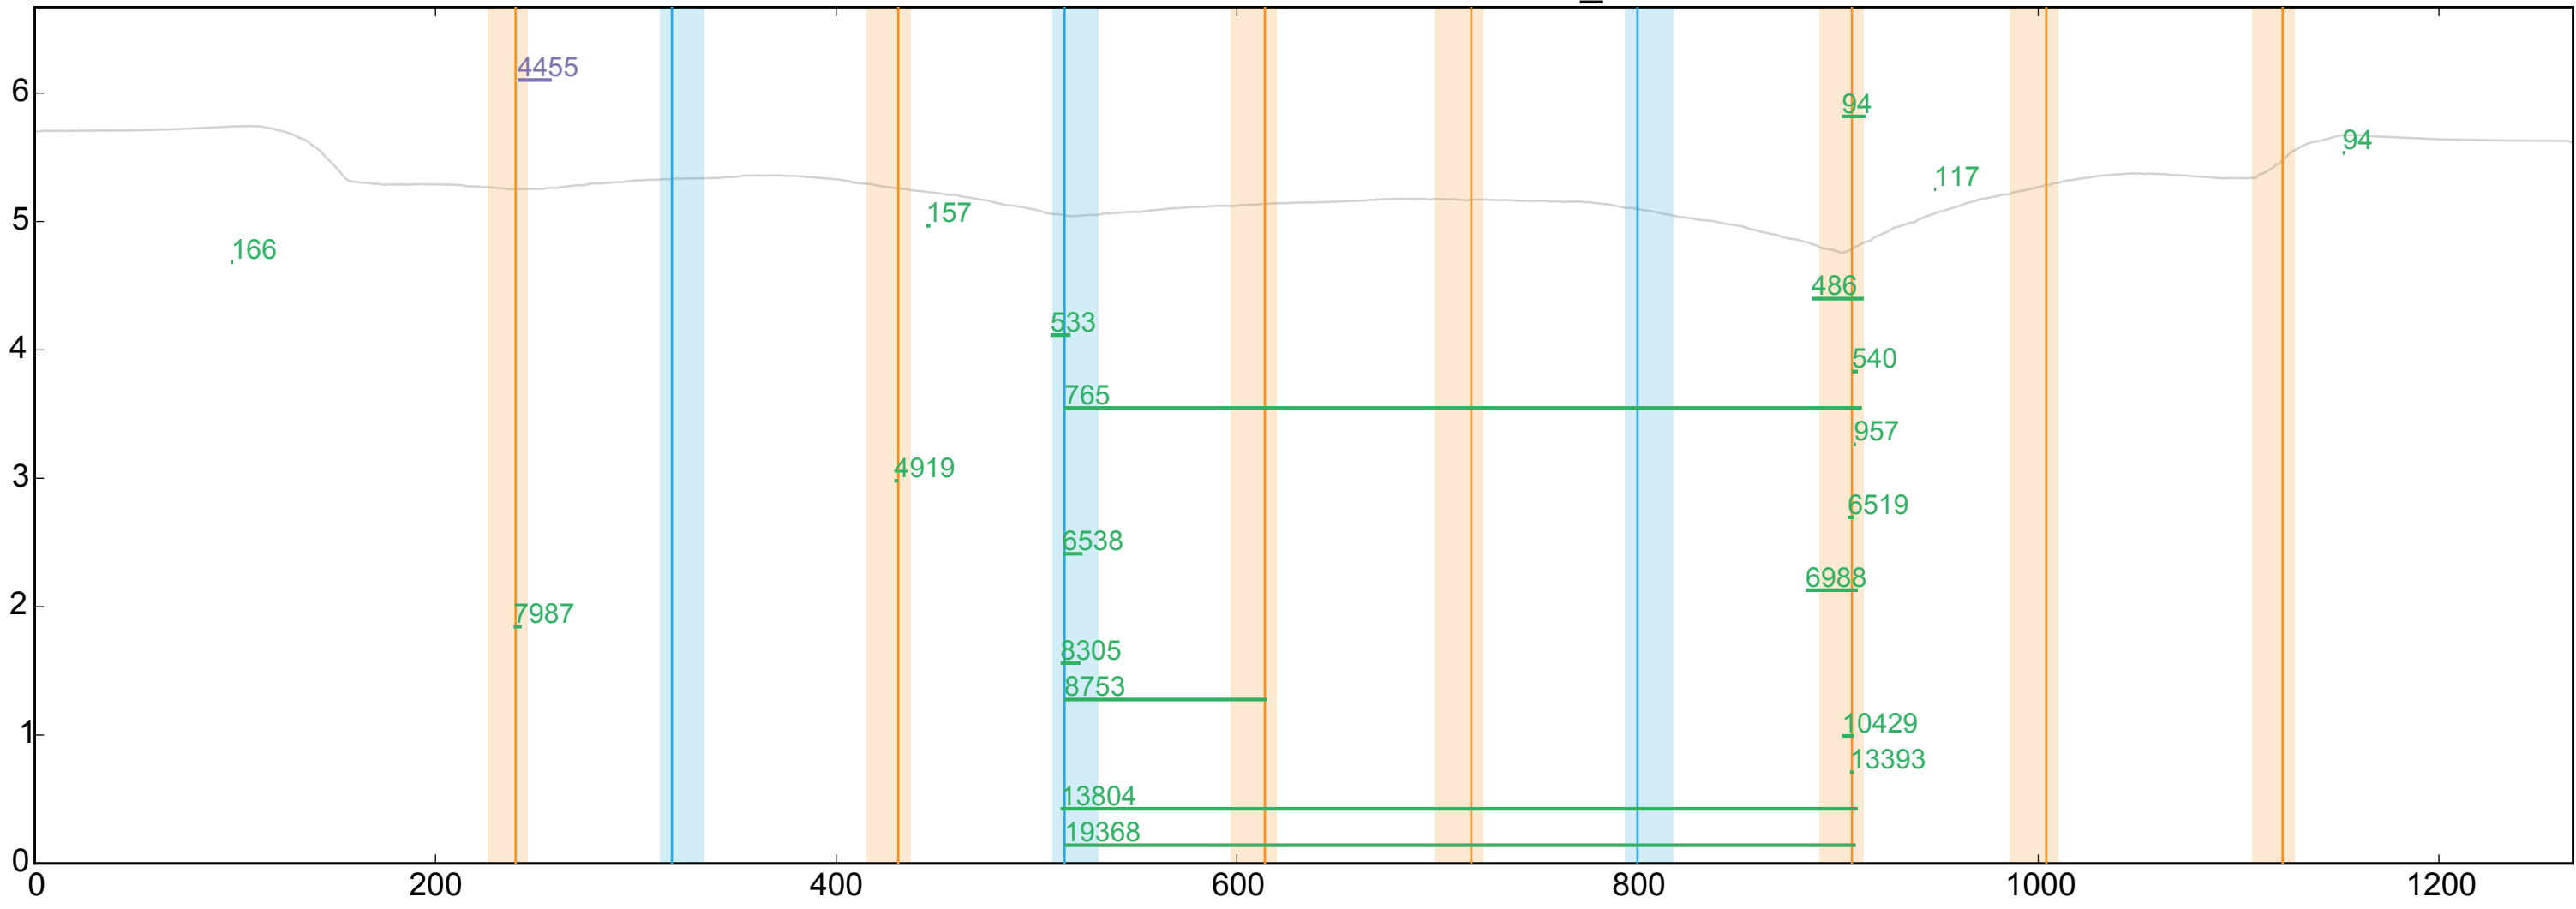

WT ENSDARG00000035563\_0

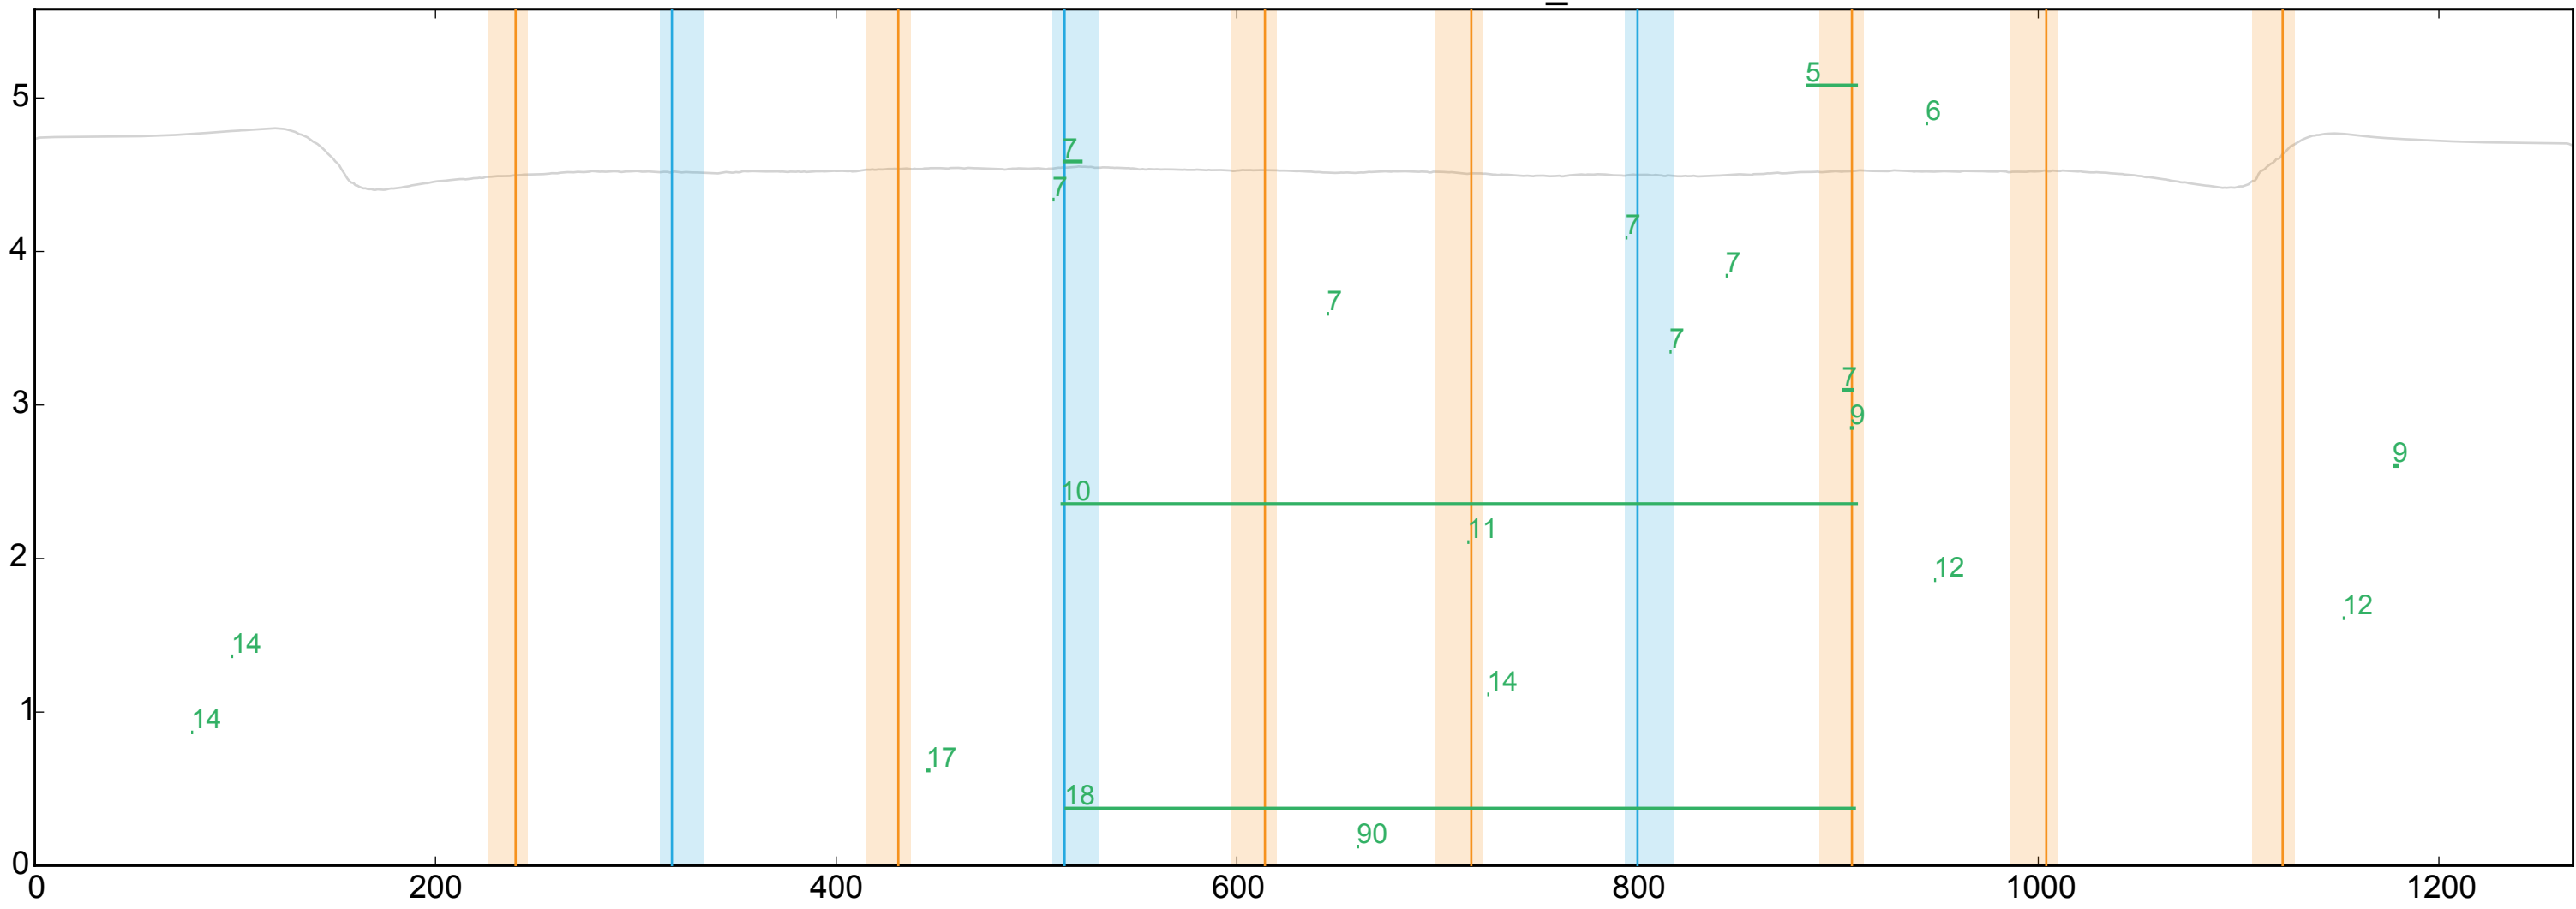



Mutant ENSDARG00000071150\_18

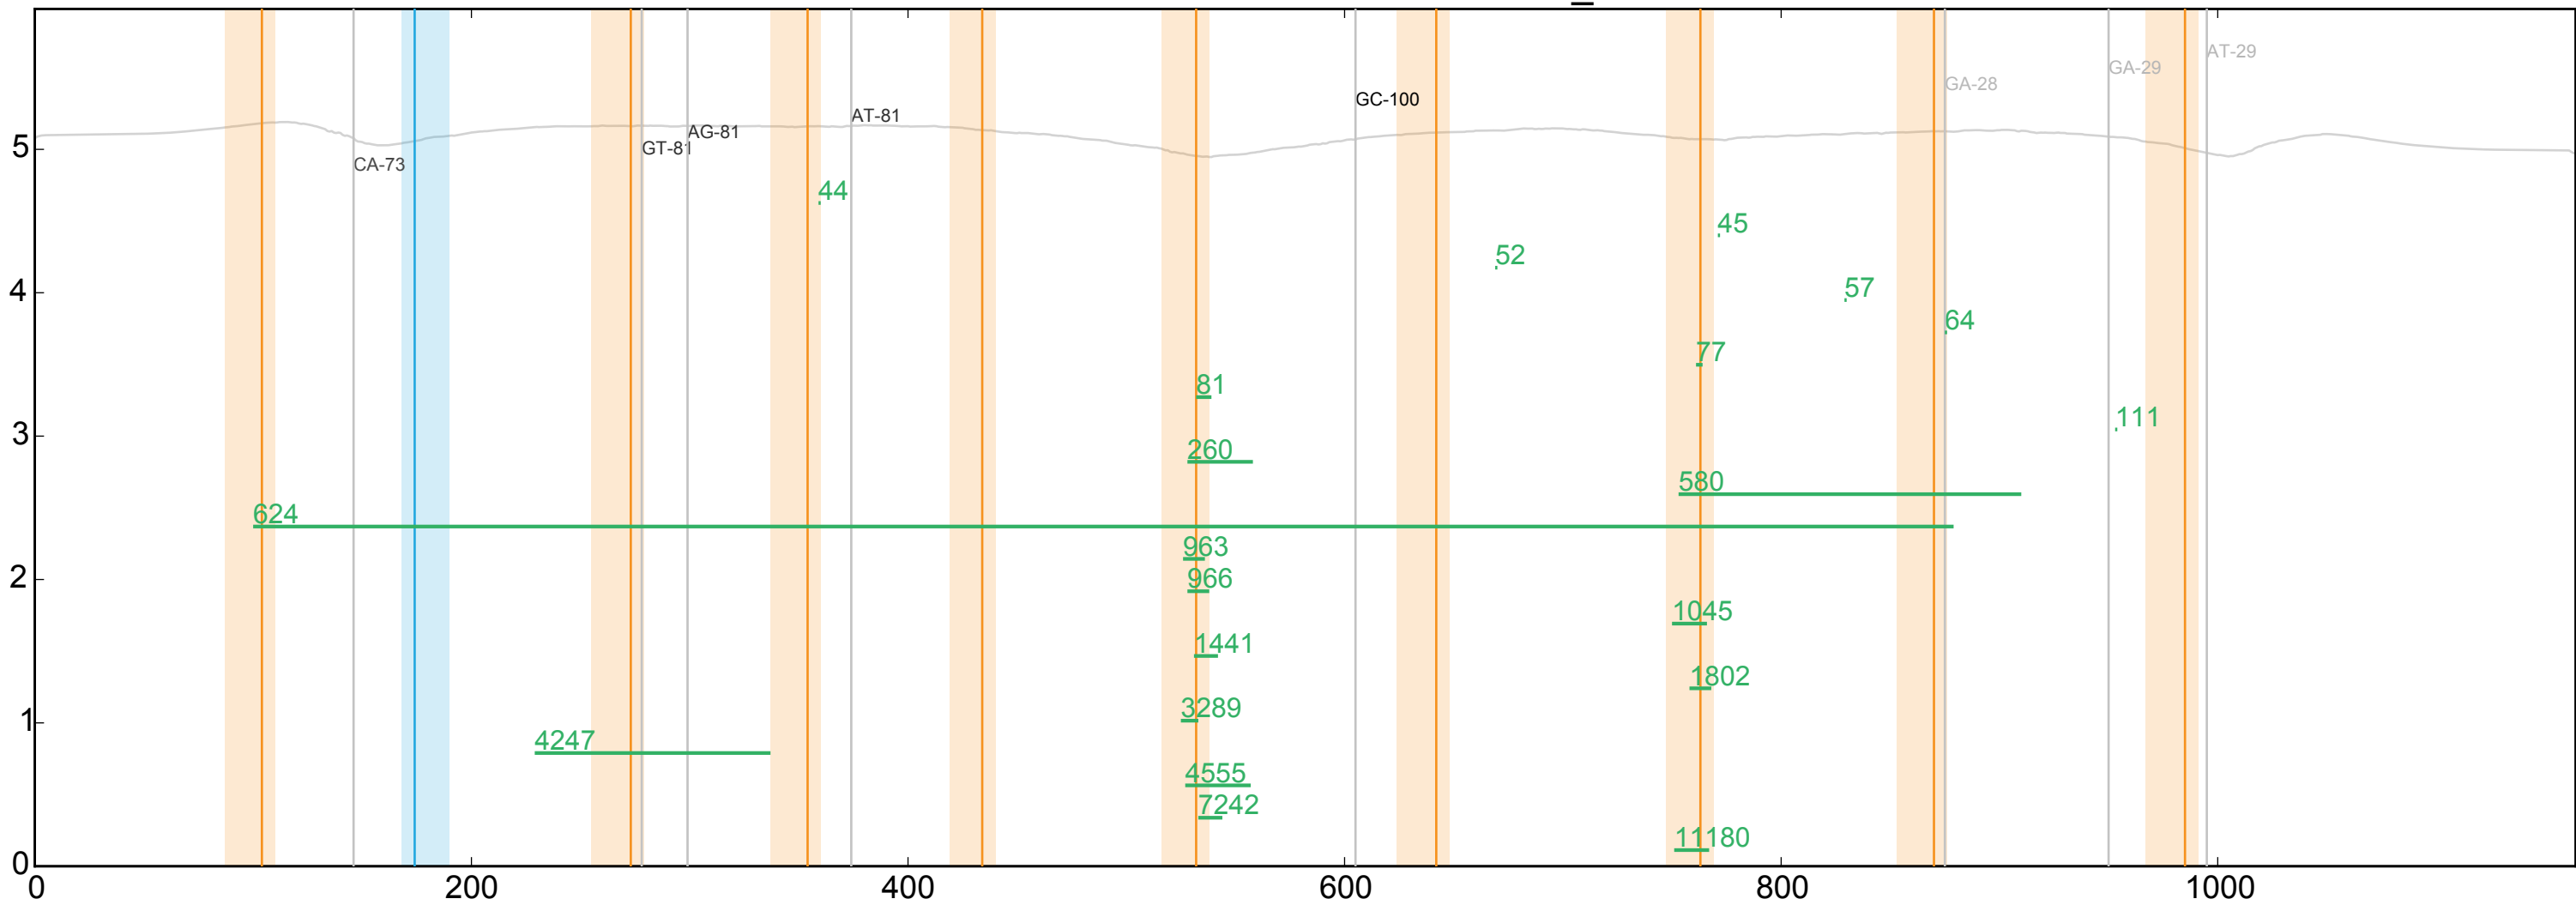

WT ENSDARG00000071150\_18

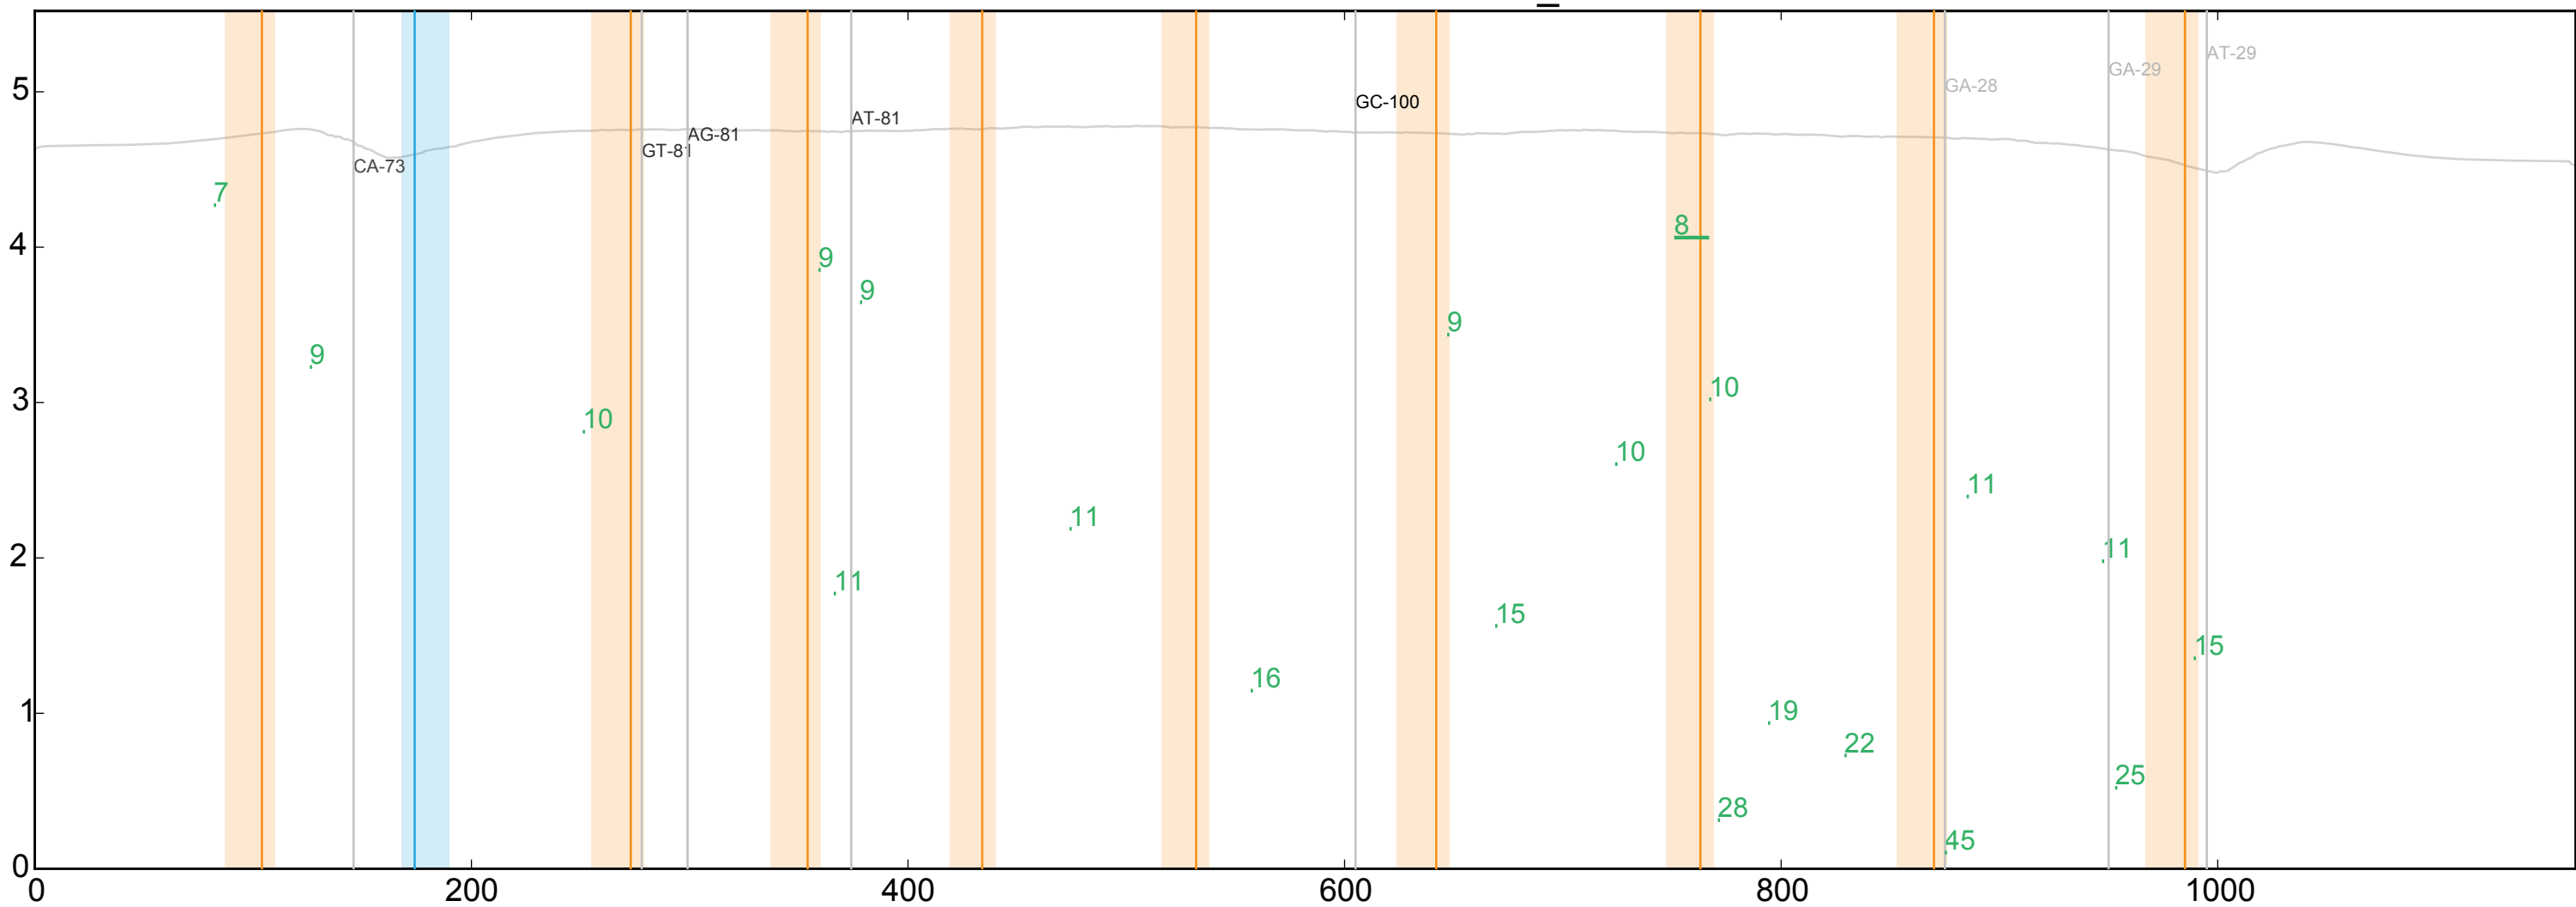

Mutant ENSDARG00000075593\_0

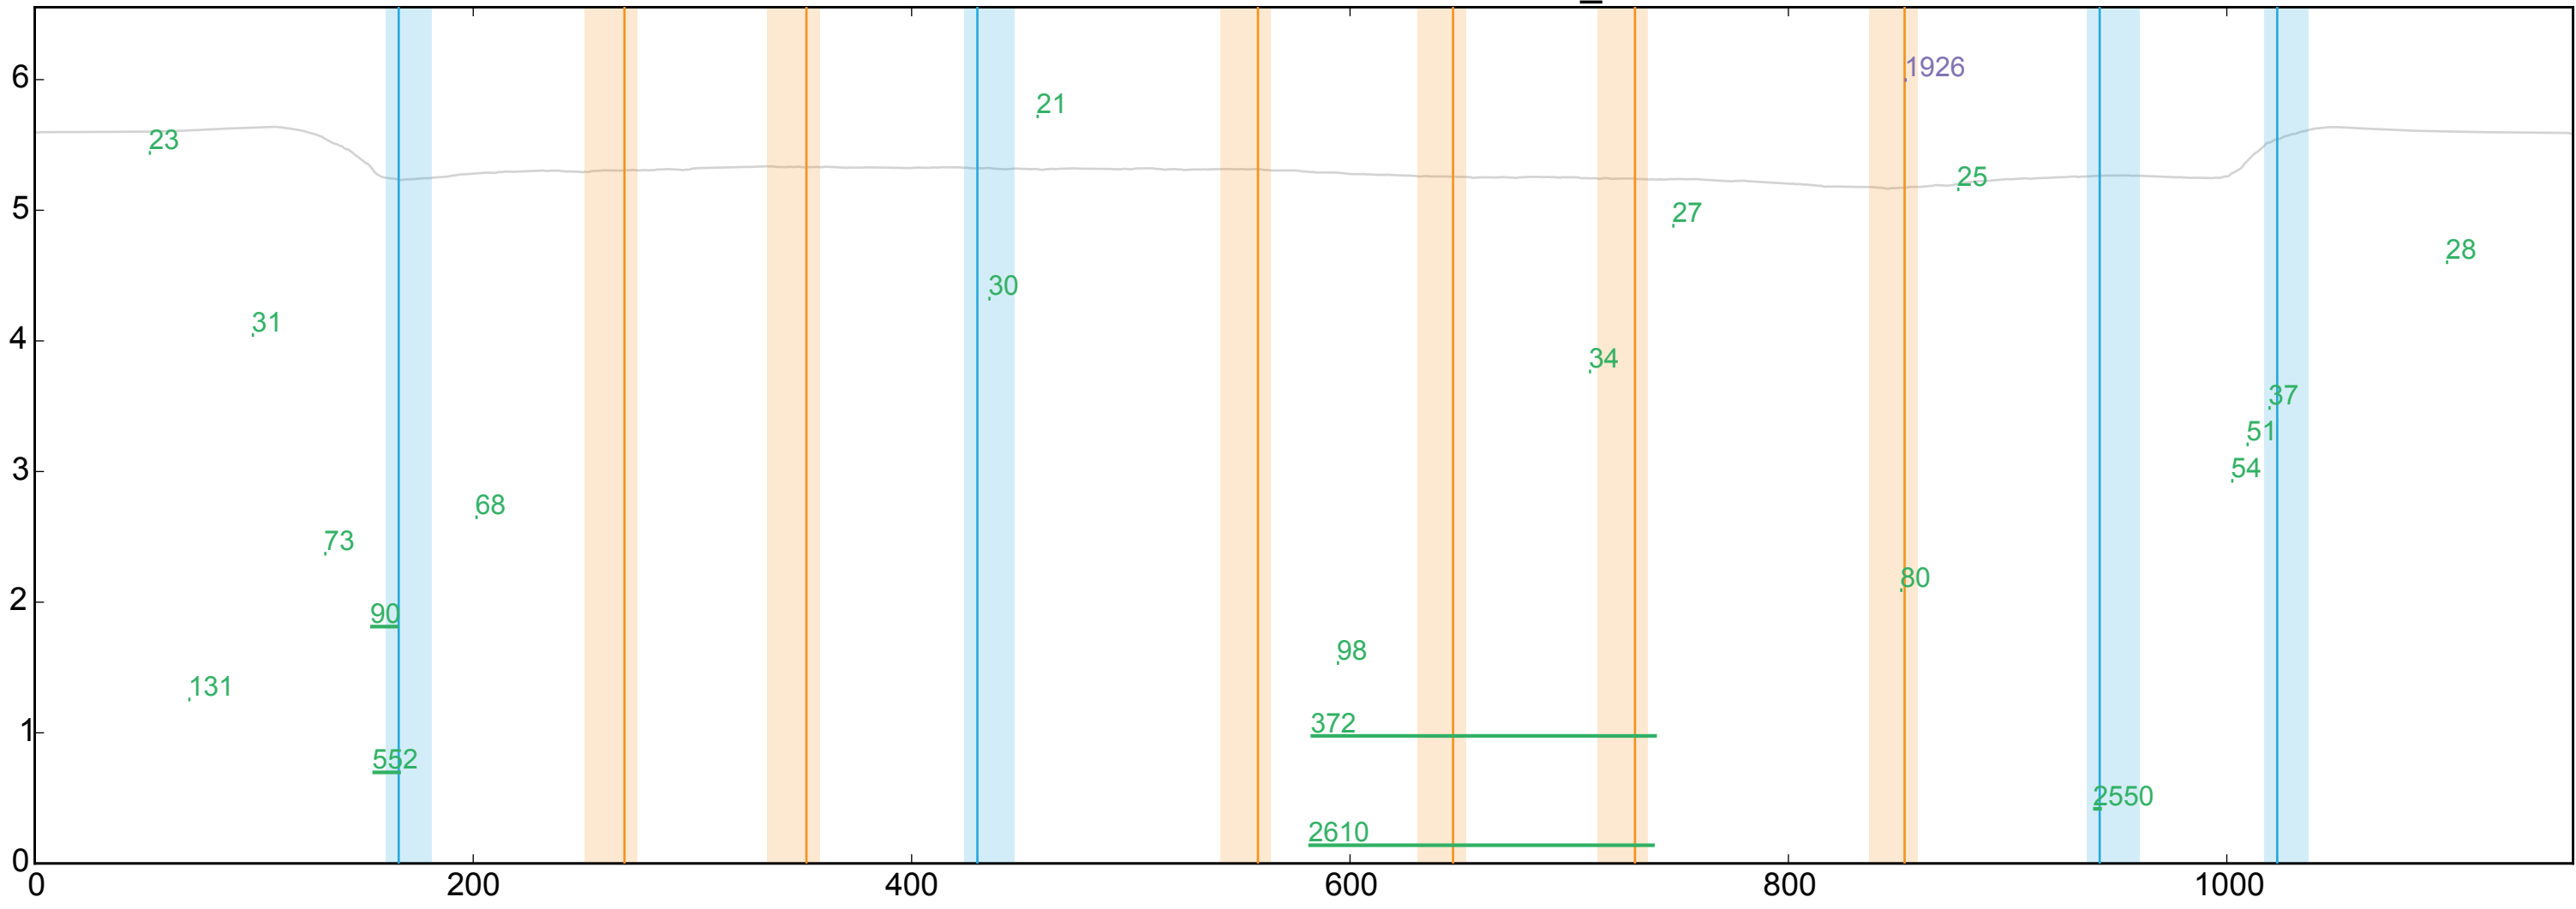

WT ENSDARG00000075593\_0

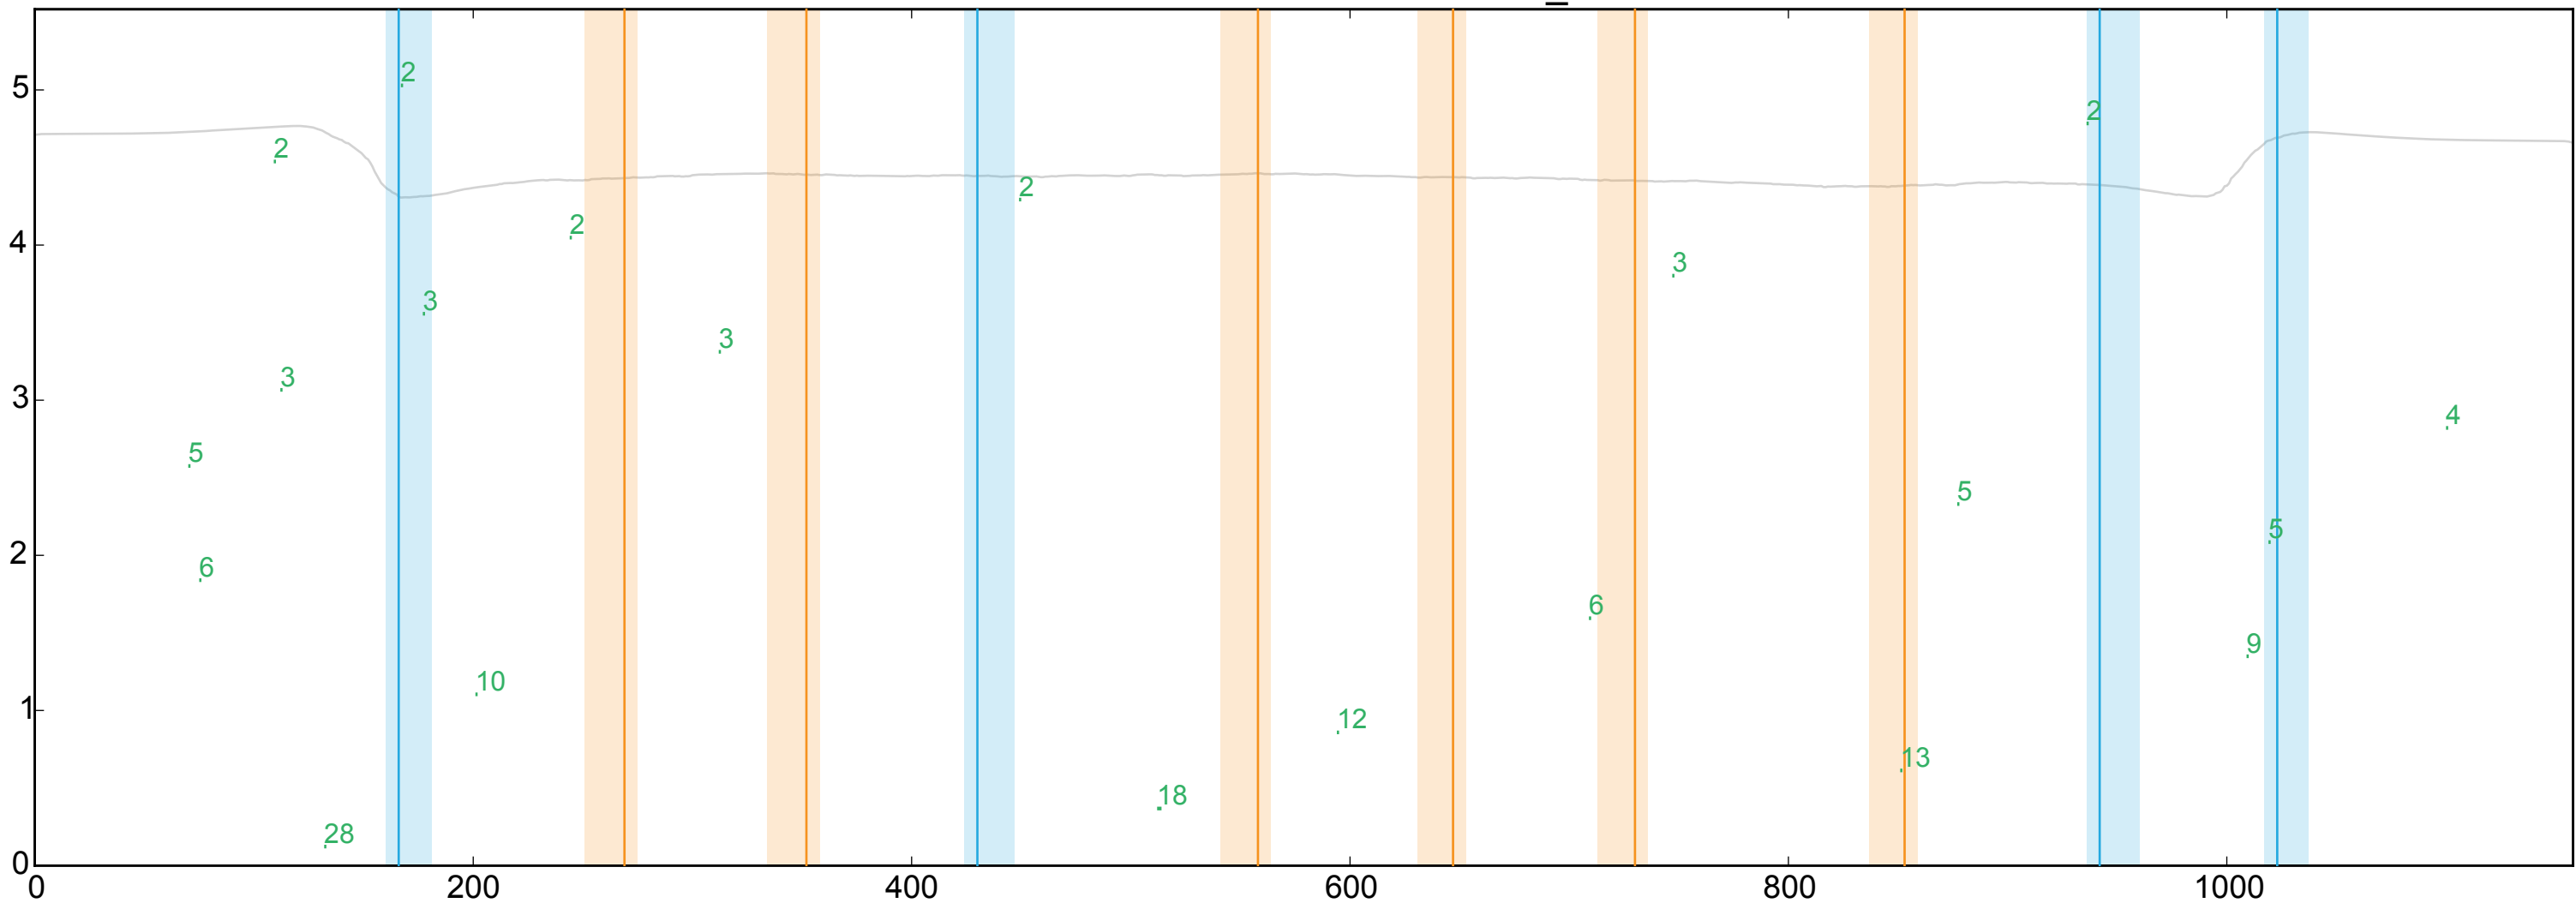

Mutant ENSDARG0000093357\_3

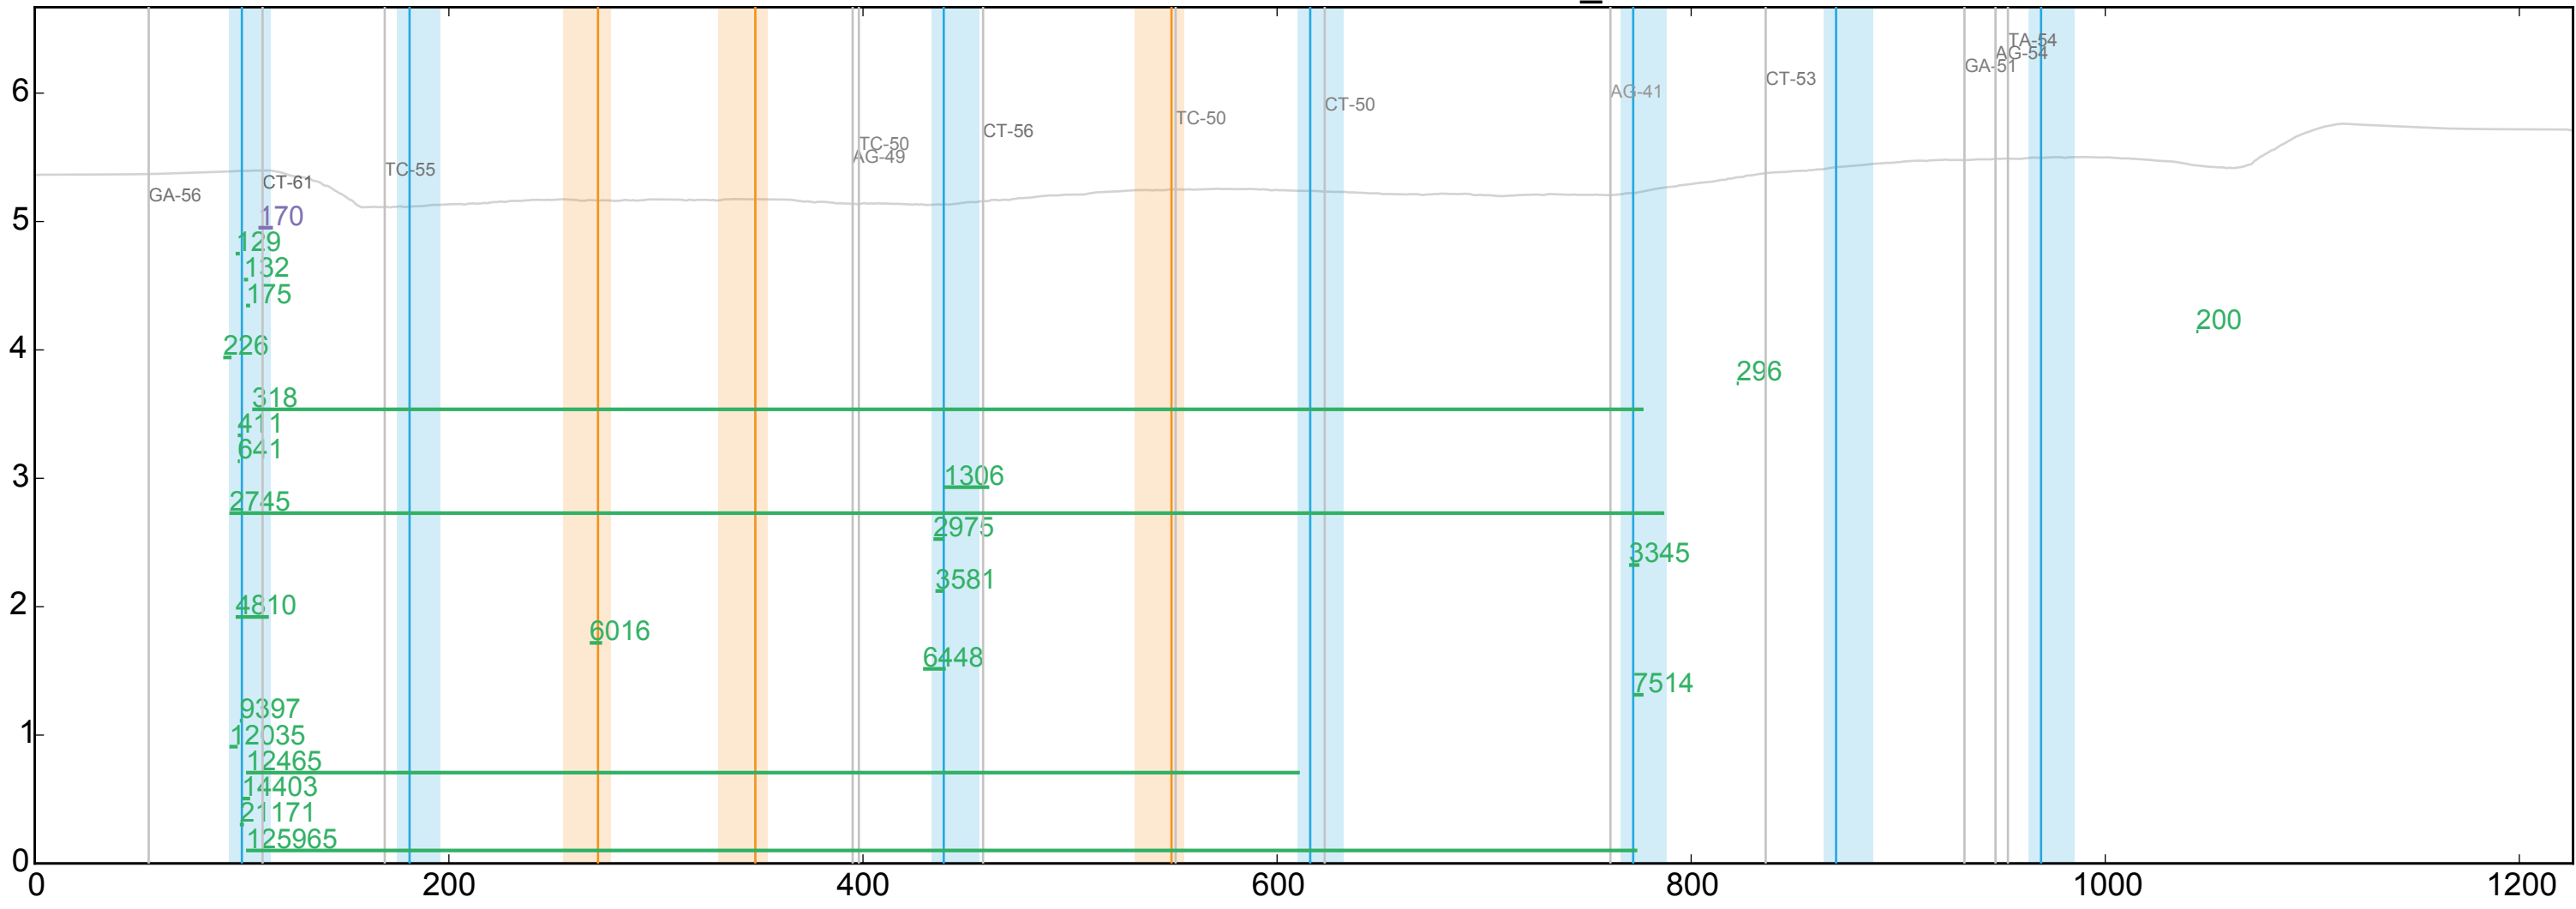

WT ENSDARG0000093357\_3

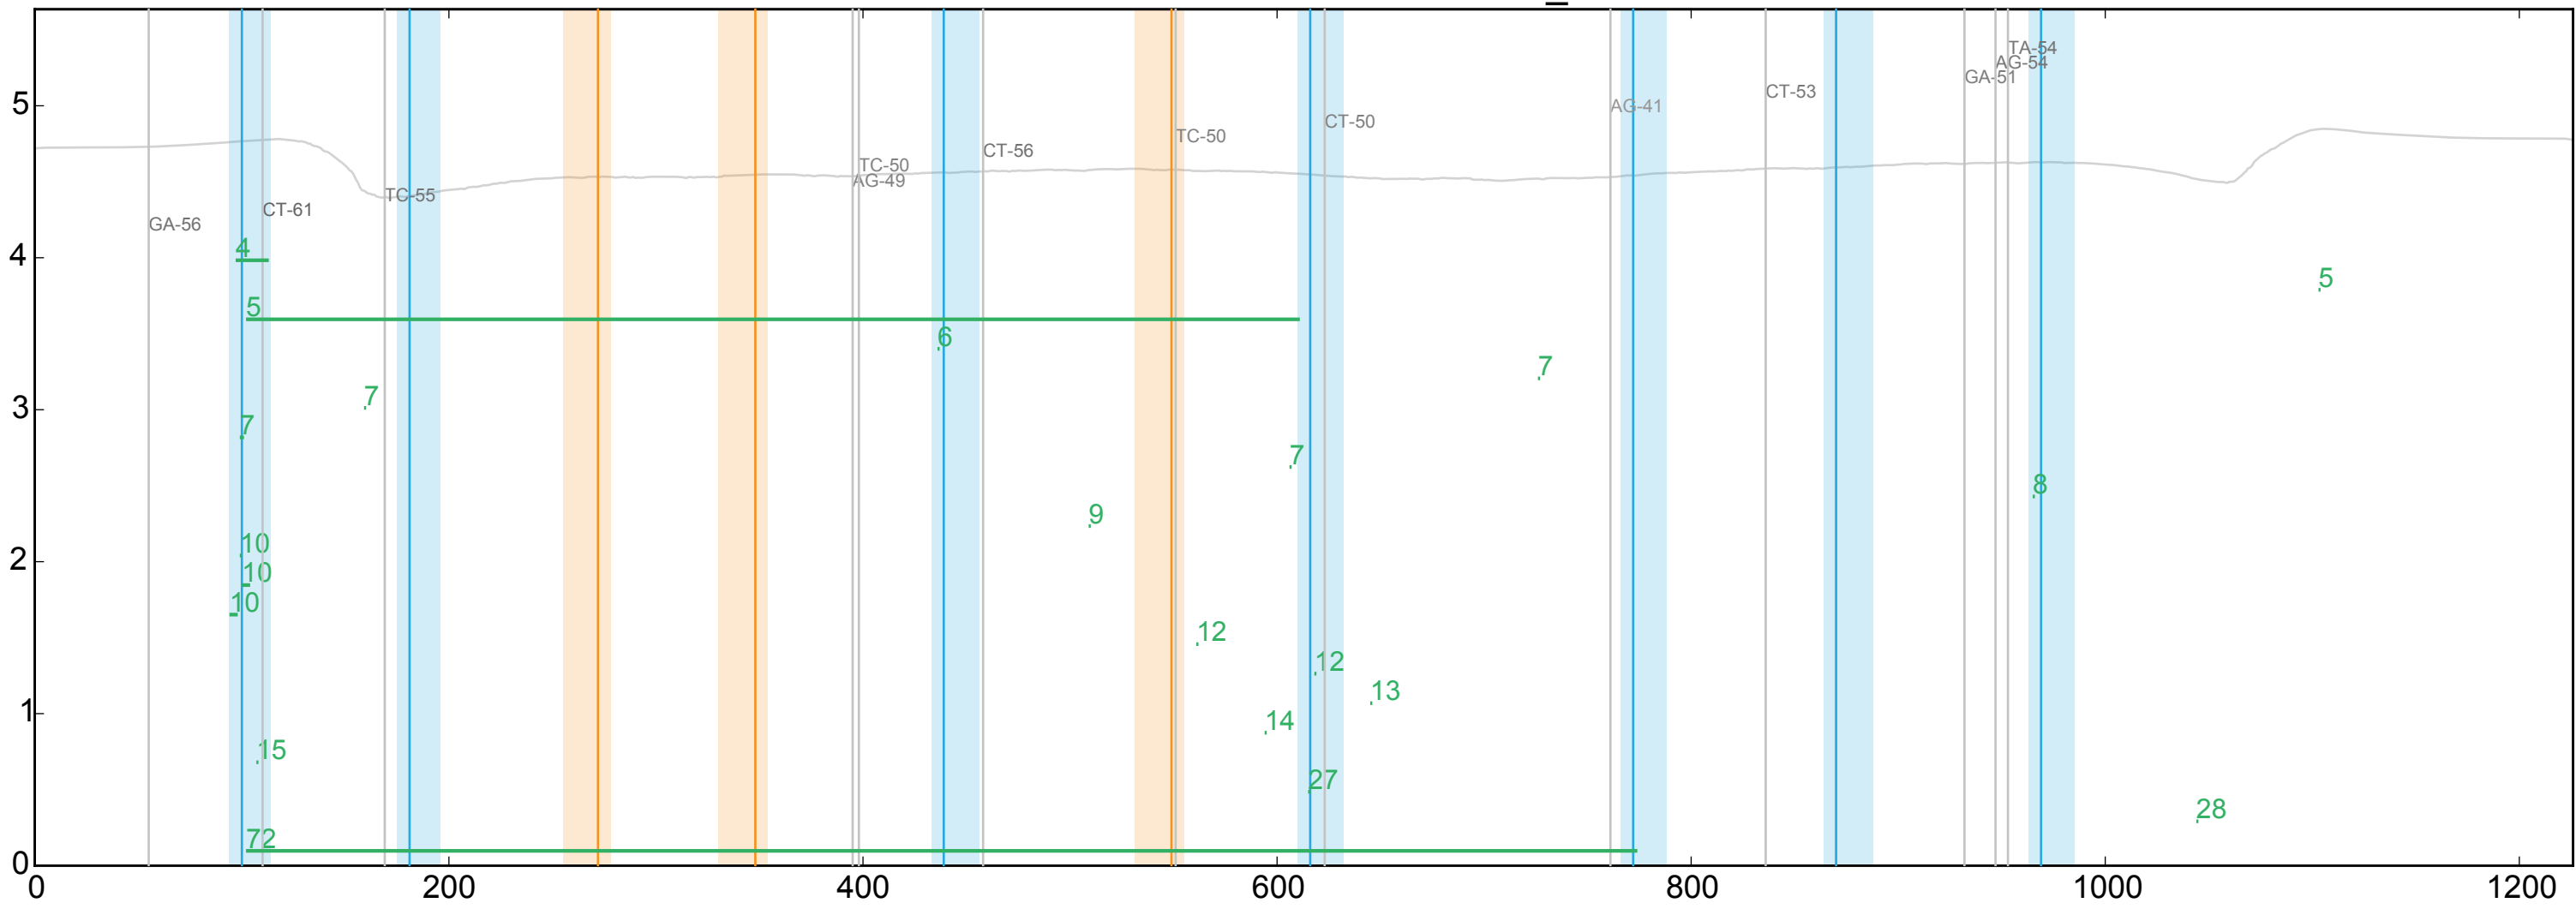

Mutant ENSDARG00000042826\_0

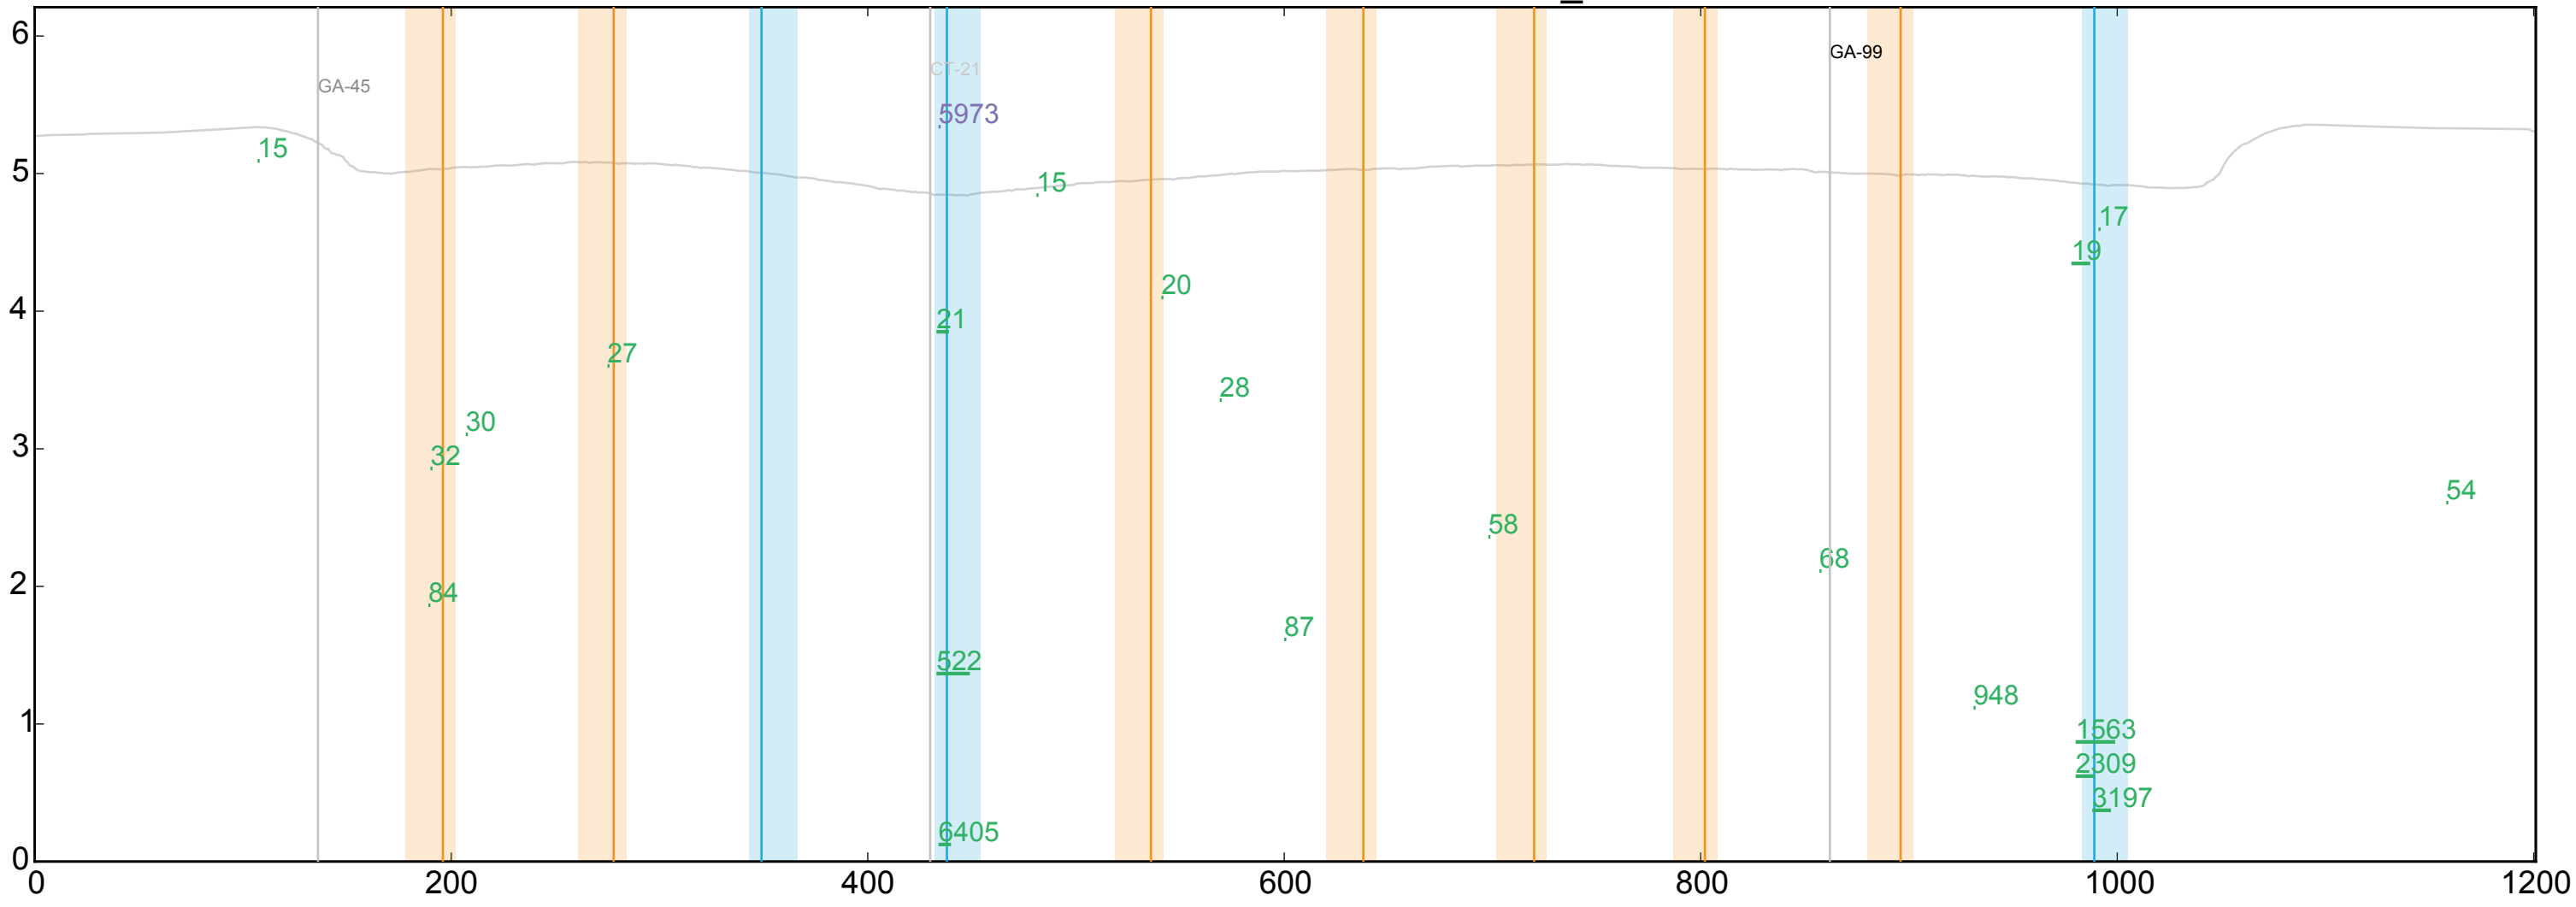

WT ENSDARG00000042826\_0

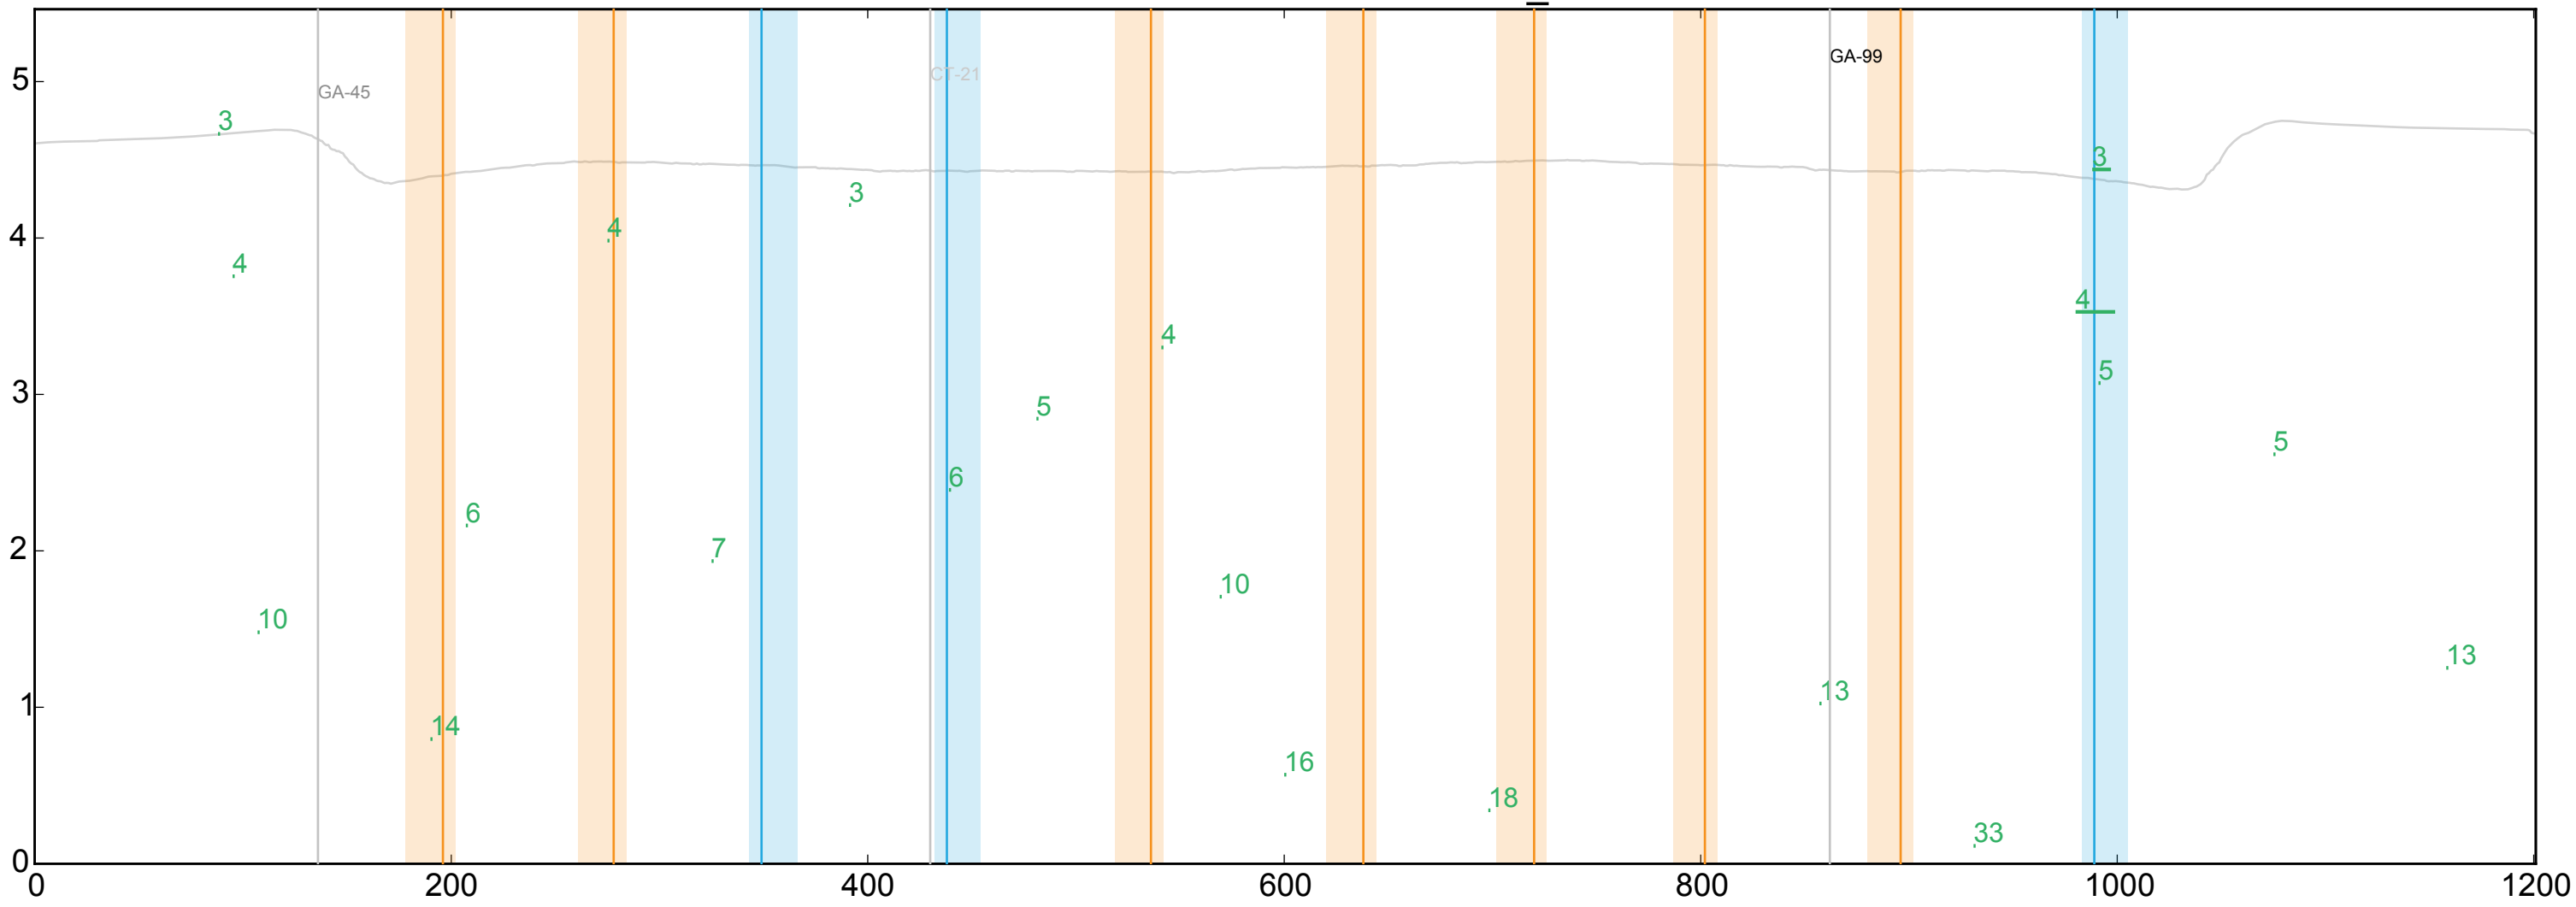

Mutant ENSDARG00000028415\_0

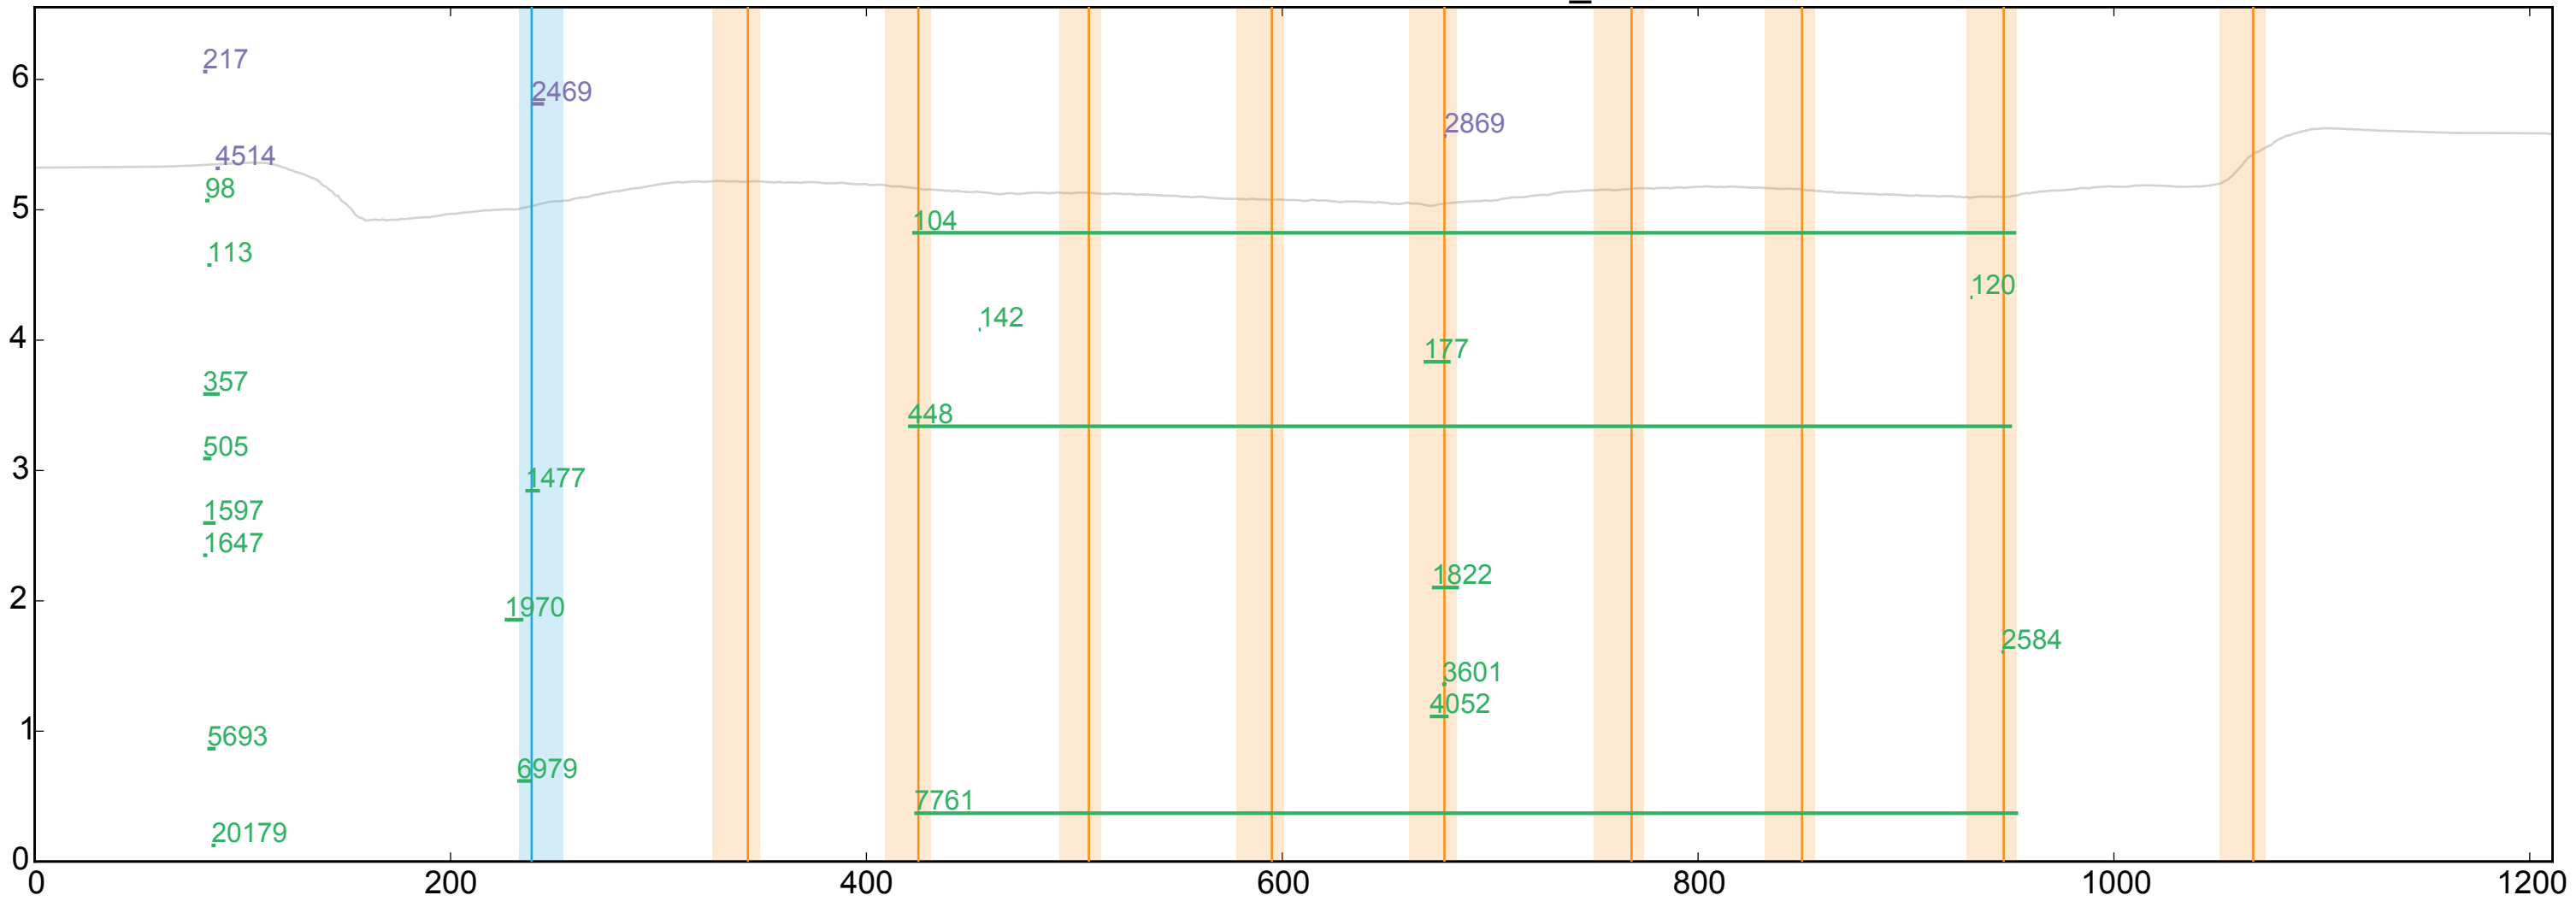

WT ENSDARG00000028415\_0

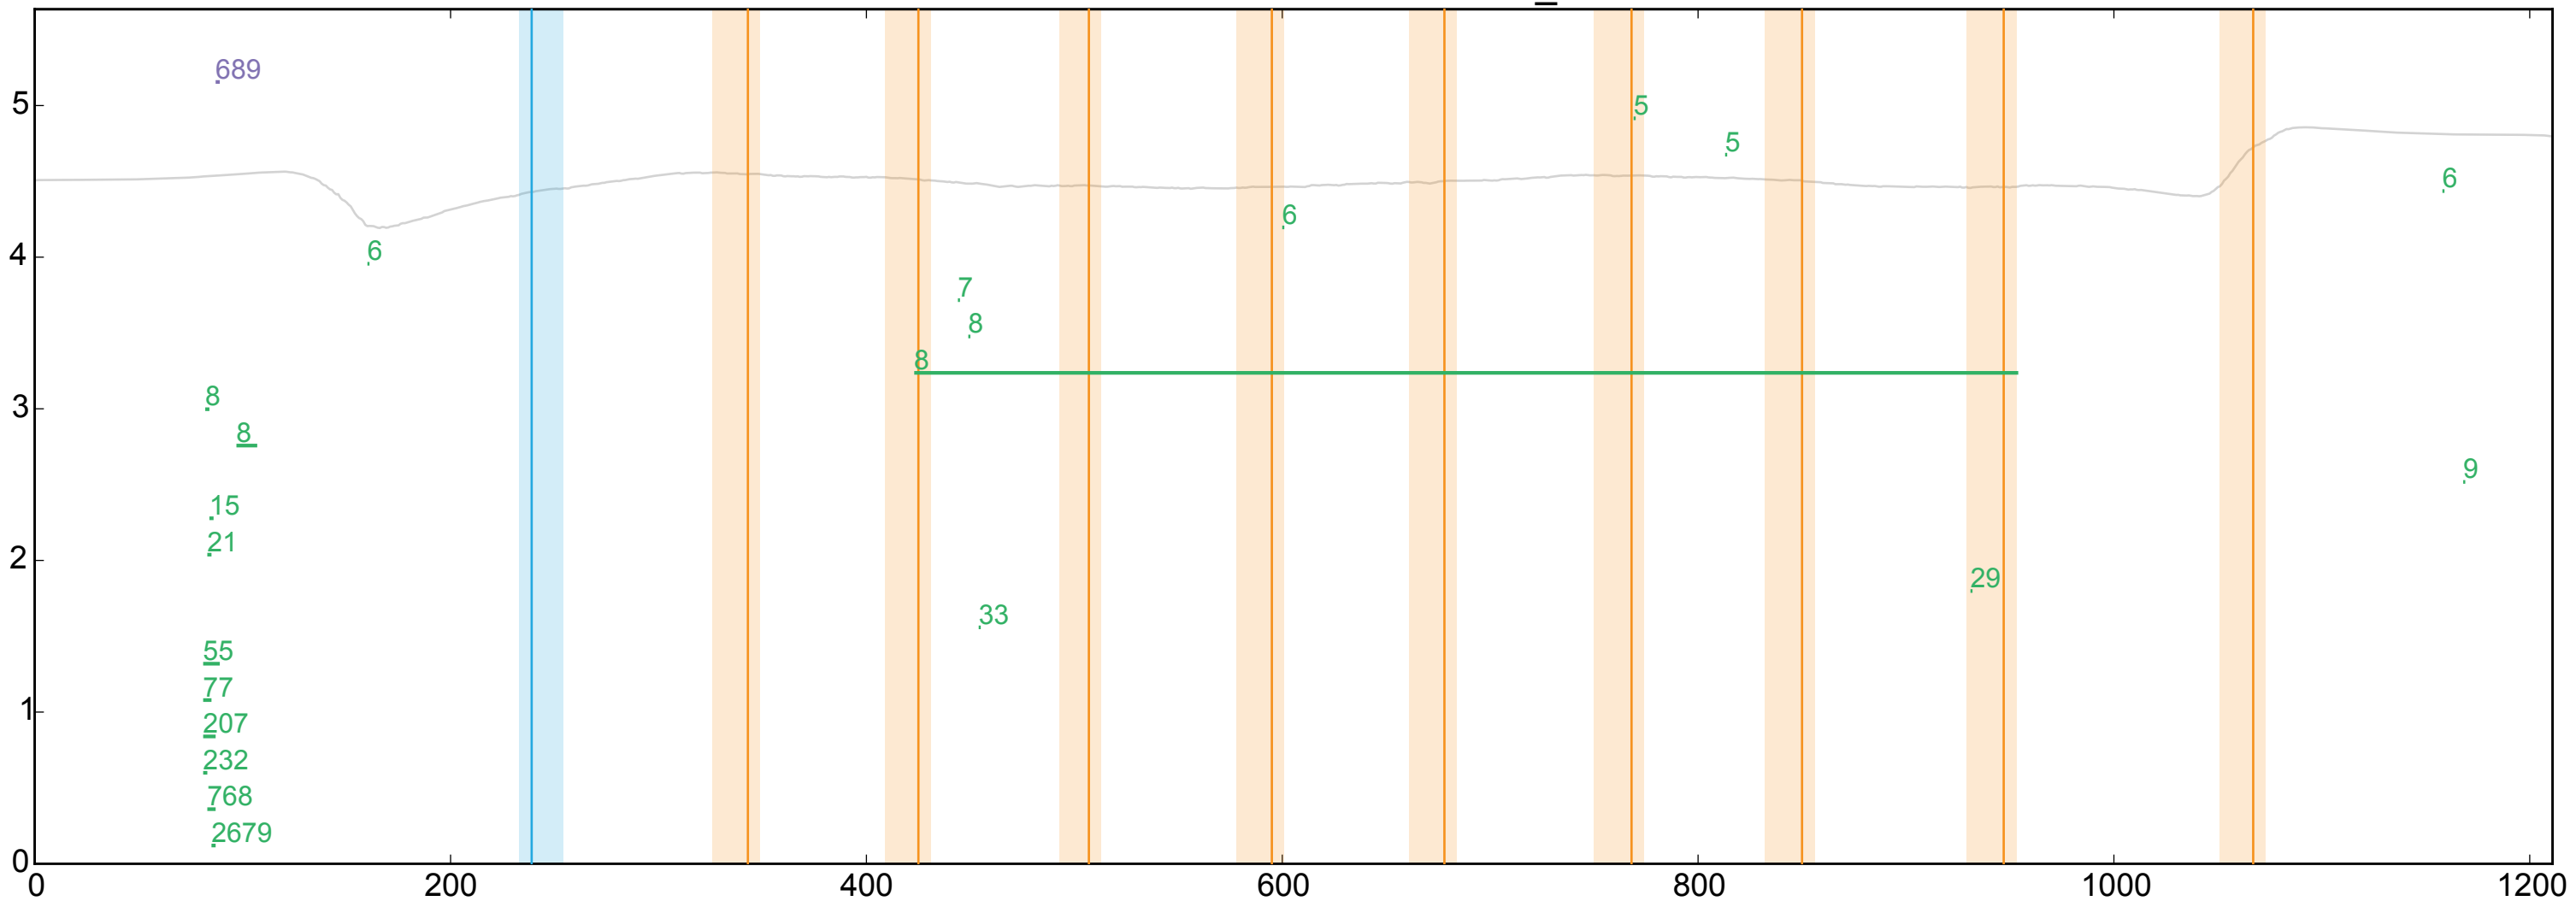

Mutant ENSDARG00000068650\_6

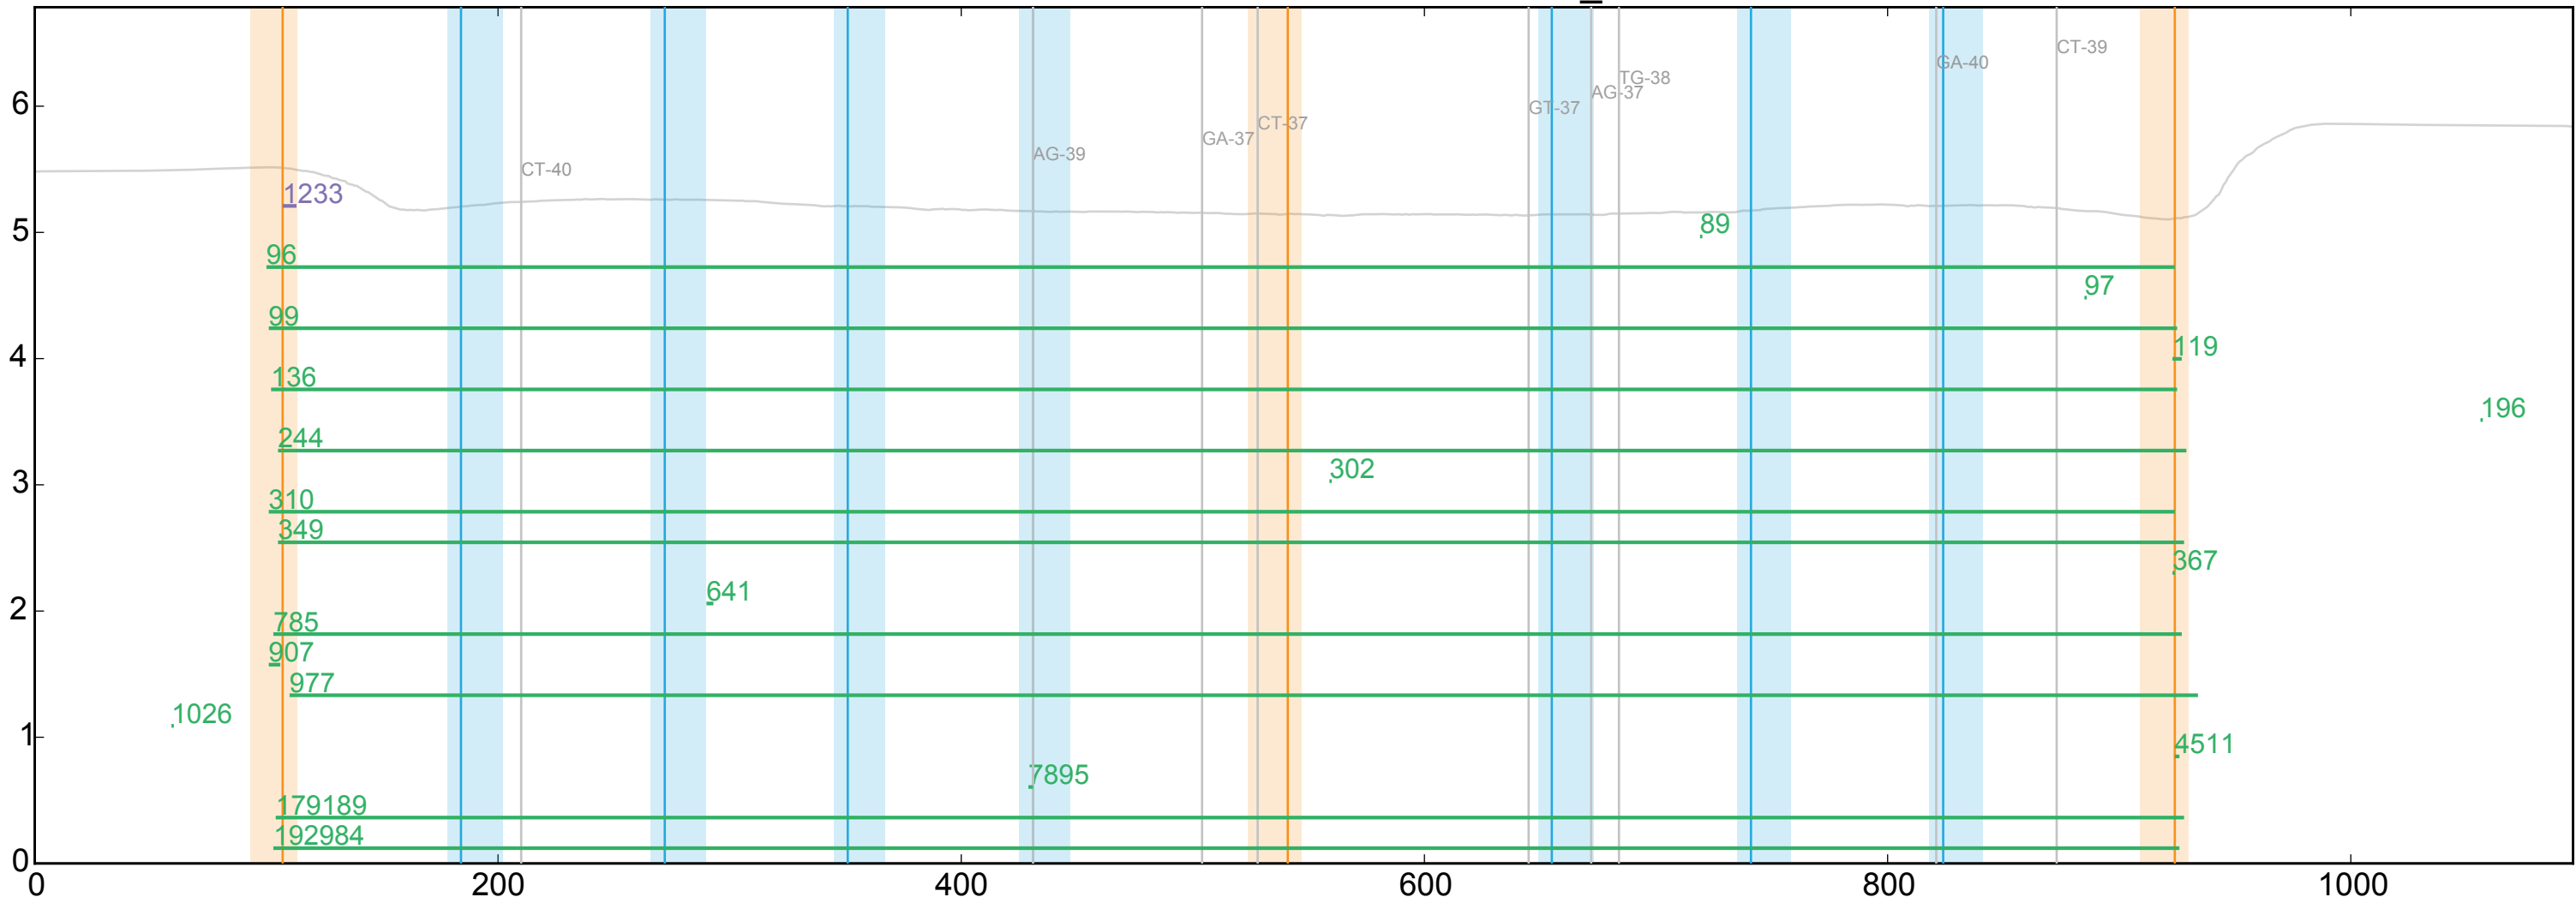

WT ENSDARG00000068650\_6

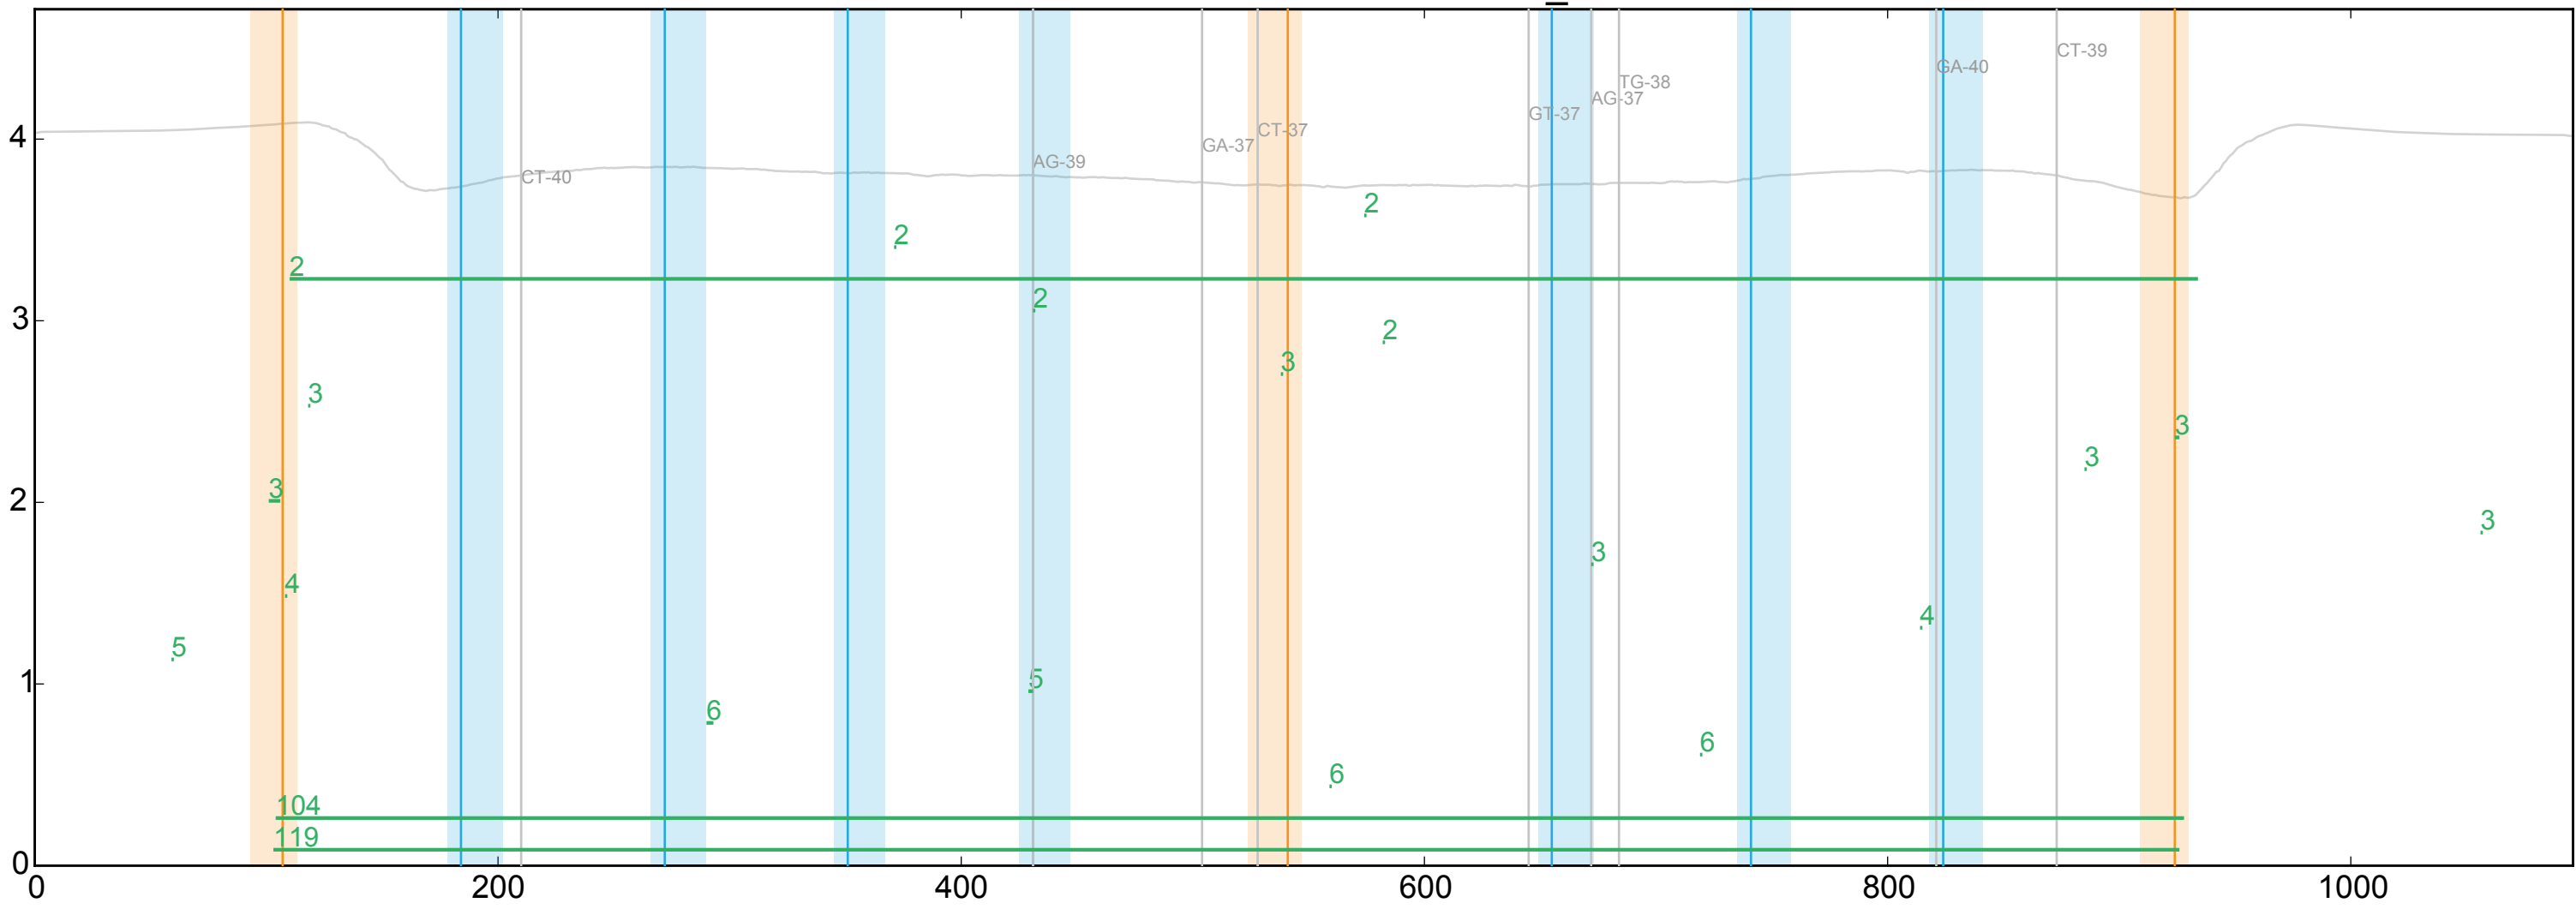

Mutant ENSDARG00000036482\_0

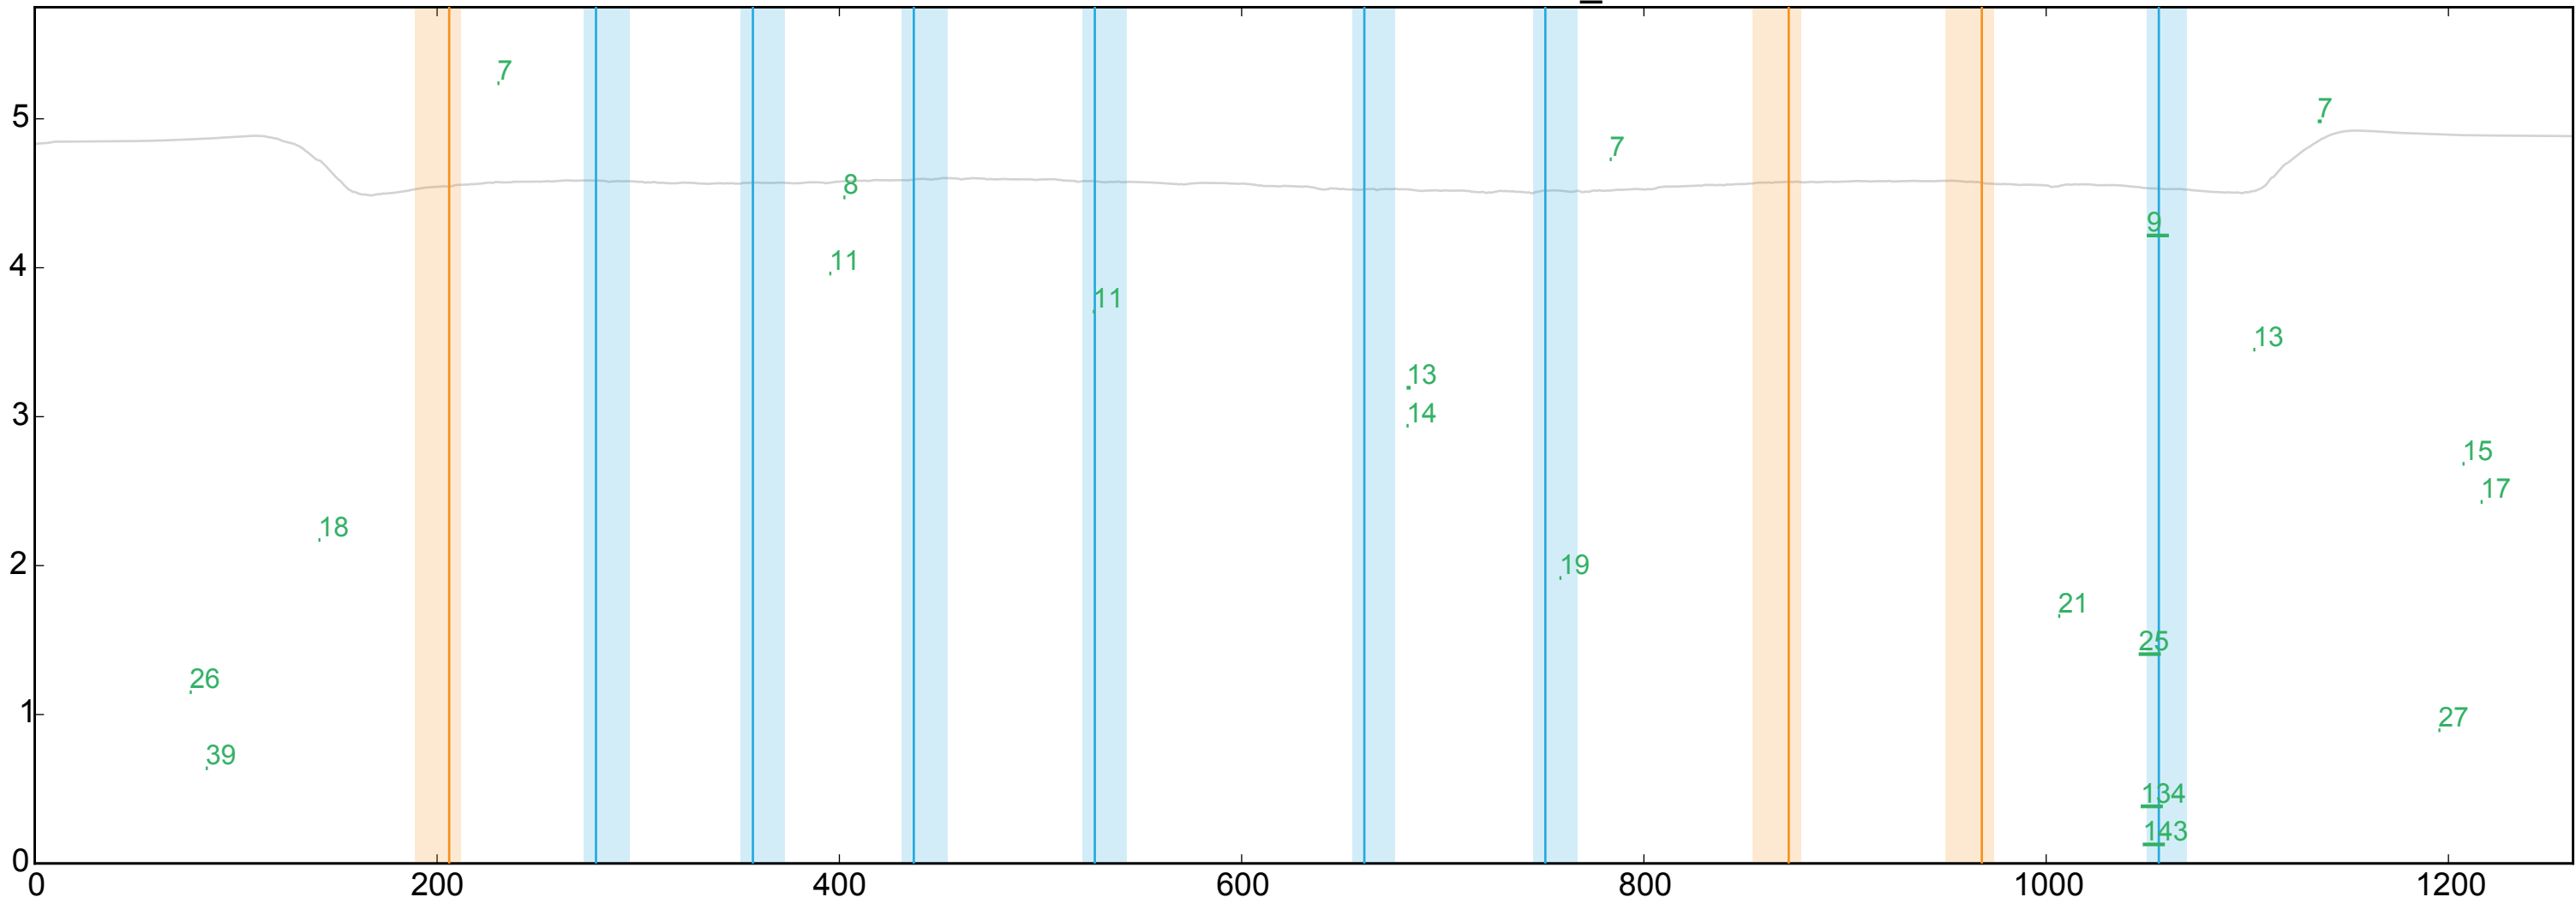

WT ENSDARG00000036482\_0

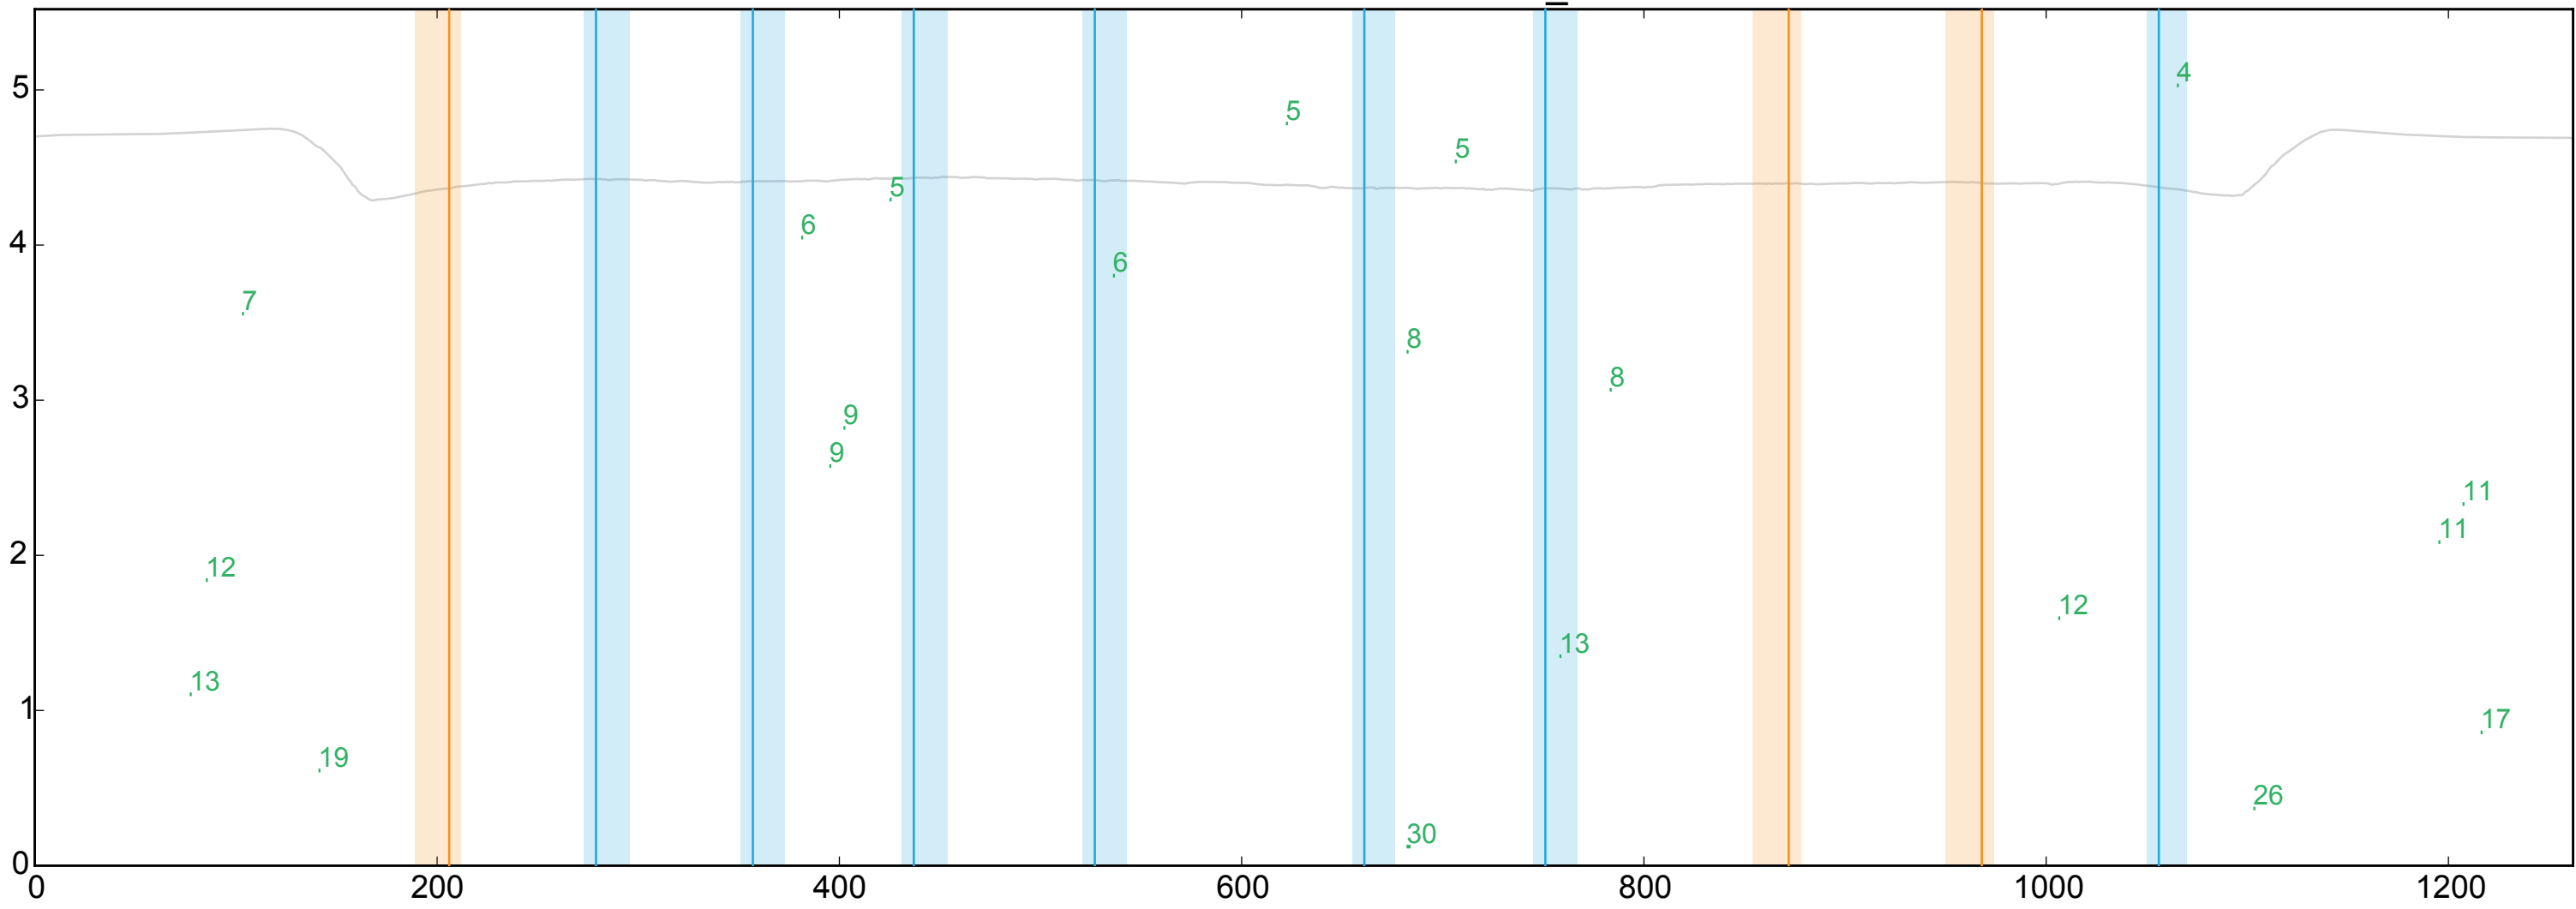

Mutant ENSDARG0000001244\_13

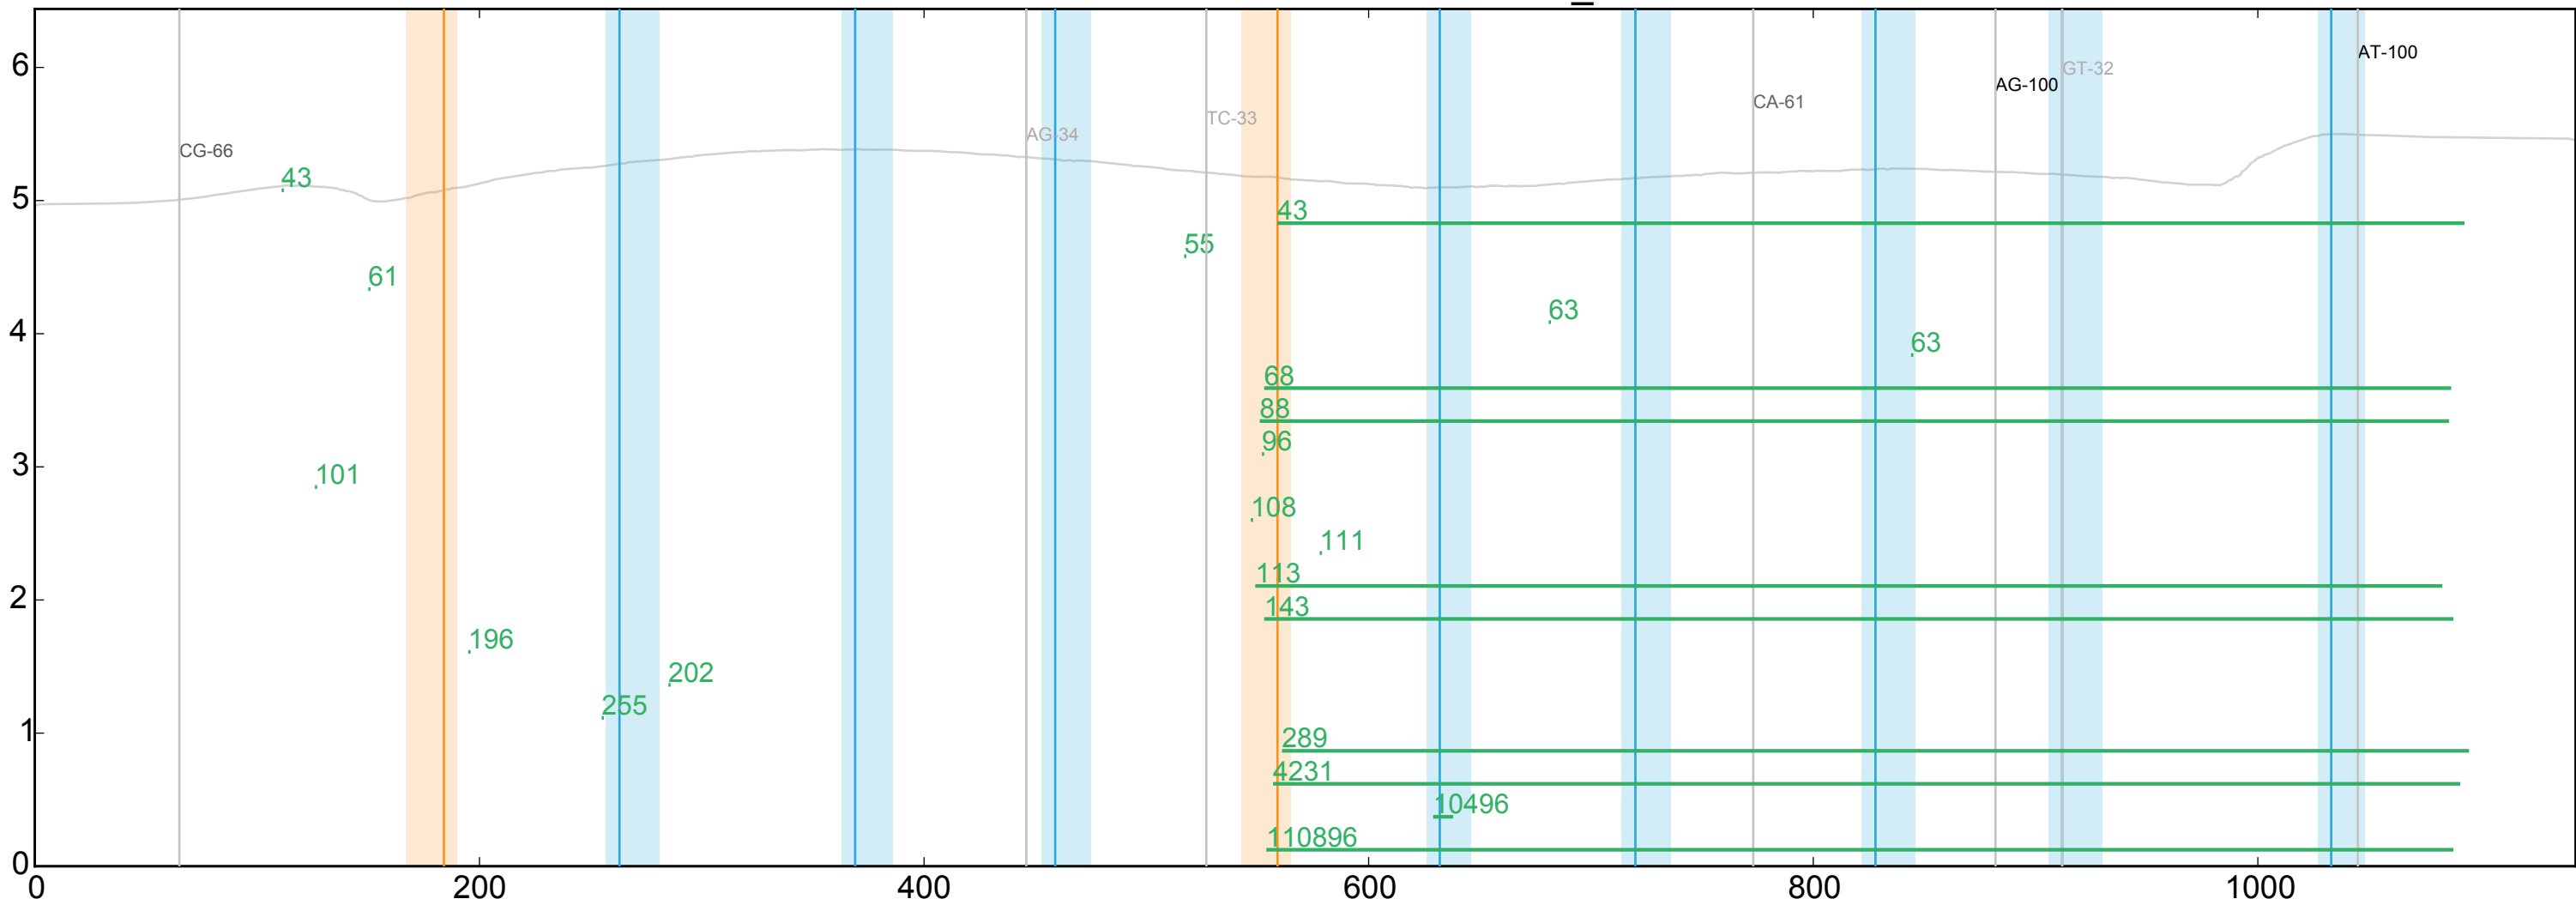

WT ENSDARG0000001244\_13

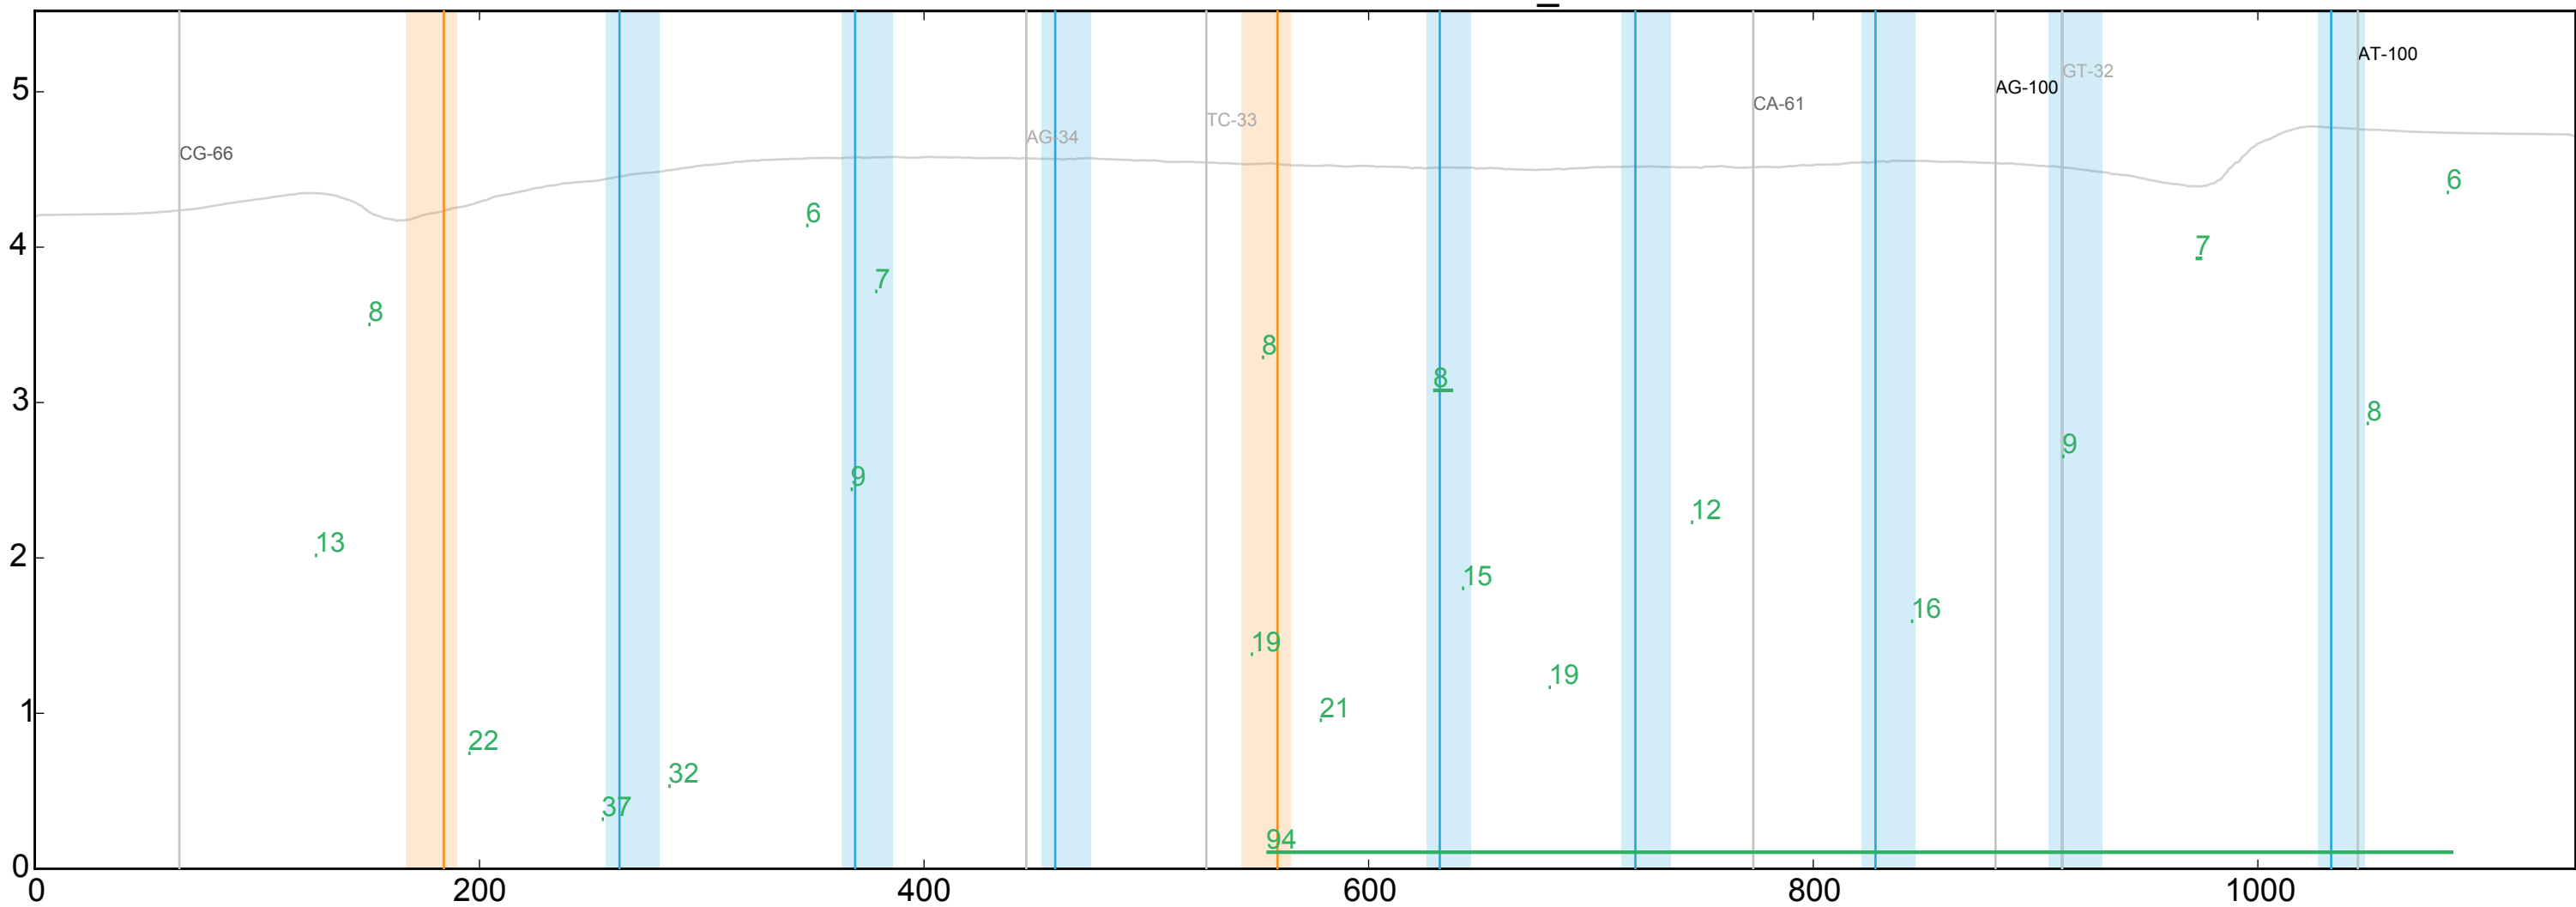

Supplement: NIHMS711531-supplement-3.pdf [file NIHMS711531-supplement-3.pdf]
